# Supplementary material for: Generic injuries are sufficient to induce ectopic Wnt organizers in Hydra
Source: eLife. 2021 Mar 29;10:e60562. doi: 10.7554/eLife.60562 (PMC8049744; doi:10.7554/eLife.60562)
Supplement: Figure 1—source data 1. — The first sheet in the workbook (‘Descriptions’) contains individual descriptions for all tables included in the workbook. [file elife-60562-fig1-data1.xlsx]

## Sheet: Descriptions
Fig. 1C	Comparison of the injury-induced change in transcript abundance during head and foot regeneration at 3 hpa. Combines results from H3vH0 and F3vF0 and uses peaks that passed significance thresholds in H3vH0, F3vF0, or HR3vFR3 (corresponding formulate for comparison names and full results tables provided in Sup. File 2).
Fig. 1D	Comparison of the injury-induced change in chromatin accessibility during head and foot regeneration at 3 hpa. Combines results from H3H0 and F3F0 and uses peaks that passed significance thresholds in H3H0, F3F0, or HRFR3c0 (corresponding formulate for comparison names and full results tables provided in Sup. File 1).
Fig. 1E	Comparison of the injury-induced change in transcript abundance during head and foot regeneration at 8 hpa. Combines results from H8vH0 and F8vF0 and uses peaks that passed significance thresholds in H8vH0, F8vF0, or HR8vFR8c0 (corresponding formulate for comparison names and full results tables provided in Sup. File 2).
Fig. 1F	Comparison of the injury-induced change in chromatin accessibility during head and foot regeneration at 8 hpa. Combines results from H8H0 and F8F0 and uses peaks that passed significance thresholds in H8H0, F8F0, or HRFR8c0 (corresponding formulate for comparison names and full results tables provided in Sup. File 1).
Fig. 1G	Comparison of the injury-induced change in transcript abundance during head and foot regeneration at 12 hpa. Combines results from H12vH0 and F12vF0 and uses peaks that passed significance thresholds in H12vH0, F12vF0, or HR12vFR12c0 (corresponding formulate for comparison names and full results tables provided in Sup. File 2).
Fig. 1H	Comparison of the injury-induced change in chromatin accessibility during head and foot regeneration at 12 hpa. Combines results from H12H0 and F12F0 and uses peaks that passed significance thresholds in H12H0, F12F0, or HRFR12c0 (corresponding formulate for comparison names and full results tables provided in Sup. File 1).
Fig. 1I	Aggregate accessibility scores per ATAC-seq replicate as calculated by chromVAR for all motifs with significant variability over the course of regeneration. For column IDs, the first number refers to the timepoint (in hpa), the letter refers to the regeneration type (head or foot), and the trailing number refers to the replicate number.

## Sheet: Fig. 1C
Gene ID	Swissprot Annotation	Foot Reg logFC	Head Reg logFC	Structural Enrichment
g10056	sp|P0CJ14|VP302_LYCMC	7.01809	6.09755	Not Interesting
g10380	sp|P49919|CDN1C_MOUSE	0.648529	0.447903	Not Interesting
g10458	sp|Q18775|DOPR4_CAEEL	3.61193	3.22363	Not Interesting
g10485	NA	0.584662	0.31864	Not Interesting
g10498	sp|O93603|TRFR_CHICK	-1.26596	-1.33984	Not Interesting
g10500	NA	-0.382288	-0.543237	Not Interesting
g10594	sp|O35426|XBP1_MOUSE	0.74148	0.677543	Not Interesting
g10616	sp|Q80U35|ARHGH_MOUSE	-0.647144	-0.537283	Not Interesting
g1063	sp|P0DN09|VKT5_ANEVI	1.56863	1.12563	Not Interesting
g1064	sp|Q28864|TFPI1_MACMU	1.49628	1.06205	Not Interesting
g10649	sp|Q9VJ79|PDE11_DROME	-0.464422	-0.218784	Not Interesting
g10680	sp|H2A0N9|KCP4_PINMG	1.92552	2.30695	Not Interesting
g10706	sp|P0CP96|FKBP2_CRYNJ	-0.286377	-0.427207	Not Interesting
g10737	sp|D4AK17|PLCX1_ARTBC	0.152225	0.487757	Not Interesting
g10782	sp|Q60700|M3K12_MOUSE	-0.489537	-0.613232	Not Interesting
g10787	sp|D3ZHA0|FLNC_RAT	-0.798195	-0.743673	Not Interesting
g10932	sp|P29061|CHIB_TOBAC	-1.18151	-0.988238	Not Interesting
g10955	sp|B3EWZ3|CADN_ACRMI	0.524028	0.546755	Not Interesting
g1096	sp|Q63429|UBC_RAT	0.42344	0.407868	Not Interesting
g10967	NA	1.33749	1.16782	Not Interesting
g10986	NA	0.539401	0.502424	Not Interesting
g11016	NA	1.23306	0.928251	Not Interesting
g11021	sp|O76075|DFFB_HUMAN	1.54795	1.13329	Not Interesting
g11062	sp|Q9H4G4|GAPR1_HUMAN	0.925083	0.904988	Not Interesting
g11091	sp|Q92519|TRIB2_HUMAN	0.586538	0.38044	Not Interesting
g11095	sp|P97494|GSH1_MOUSE	-0.598164	-0.546238	Not Interesting
g11106	NA	-0.76735	-0.939592	Not Interesting
g11204	sp|Q54TR1|CFAD_DICDI	-0.484879	-0.405851	Not Interesting
g1125	sp|Q00G26|PLIN5_HUMAN	1.52219	1.45655	Not Interesting
g11351	sp|Q7SIB2|CO4A1_BOVIN	0.765376	0.689507	Not Interesting
g11352	sp|P08120|CO4A1_DROME	0.761129	0.670231	Not Interesting
g11353	sp|Q4ZJM7|OTOL1_MOUSE	0.767541	0.731979	Not Interesting
g11354	sp|P05099|MATN1_CHICK	0.637769	0.516068	Not Interesting
g11358	NA	-2.46446	-1.49253	Not Interesting
g11363	sp|P35520|CBS_HUMAN	0.58856	0.947525	Not Interesting
g11398	sp|Q7SXW3|LRC40_DANRE	0.705384	0.779314	Not Interesting
g11444	sp|Q9H7M6|ZSWM4_HUMAN	-0.550115	-0.756687	Not Interesting
g11446	NA	-0.614046	-0.592412	Not Interesting
g11494	sp|Q7M3K2|PELET_DROME	0.689859	0.937206	Not Interesting
g11501	NA	0.834284	1.04697	Not Interesting
g11578	sp|Q9NQX5|NPDC1_HUMAN	0.382125	0.25228	Not Interesting
g11698	sp|P55112|NAS4_CAEEL	4.83285	5.39039	Not Interesting
g11714	sp|Q9HCF6|TRPM3_HUMAN	-0.431451	-0.167846	Not Interesting
g11718	NA	2.06102	1.68732	Not Interesting
g11745	sp|Q90623|MYPT1_CHICK	1.03339	1.01851	Not Interesting
g11780	sp|Q62445|SP4_MOUSE	-0.934506	-0.808015	Not Interesting
g11886	NA	1.89553	1.60183	Not Interesting
g11950	sp|Q8CFH6|SIK2_MOUSE	1.88514	1.78259	Not Interesting
g1199	sp|P42674|BP10_PARLI	1.05817	1.14496	Not Interesting
g11994	NA	1.80974	1.43936	Not Interesting
g11996	sp|A5PN43|TM175_DANRE	1.52494	1.01343	Not Interesting
g12038	NA	-0.71857	-0.26131	Not Interesting
g12040	NA	1.14788	1.24764	Not Interesting
g12061	sp|Q08DQ2|GFPT2_BOVIN	1.10488	1.0011	Not Interesting
g1208	sp|A5PN43|TM175_DANRE	0.898124	0.406109	Not Interesting
g12126	sp|Q08E00|RASLC_BOVIN	0.97435	0.575992	Not Interesting
g12231	sp|P81439|EQST_ACTEQ	-0.541723	-0.558642	Not Interesting
g12236	NA	3.47586	3.39099	Not Interesting
g12322	sp|P40240|CD9_MOUSE	0.645041	0.517031	Not Interesting
g12371	sp|Q640R7|RAP1B_XENTR	-1.40129	-1.01219	Not Interesting
g12418	sp|Q5R8J8|DNJB4_PONAB	1.24725	1.6148	Not Interesting
g12434	sp|A4GTP4|ELK1_RAT	3.22644	2.97769	Not Interesting
g12437	NA	3.01071	2.9459	Not Interesting
g12439	sp|P41969|ELK1_MOUSE	4.48181	3.62858	Not Interesting
g12440	NA	3.46011	3.1632	Not Interesting
g12447	sp|A4GTP4|ELK1_RAT	1.08921	0.982266	Not Interesting
g12458	sp|P0C548|PLPL2_RAT	-1.60748	-1.03078	Not Interesting
g12471	NA	0.781096	0.649862	Not Interesting
g12568	NA	0.540782	0.222789	Not Interesting
g12603	sp|Q17QJ5|TSN5_BOVIN	0.625737	0.320352	Not Interesting
g12710	sp|P35283|RAB12_MOUSE	2.89913	2.71869	Not Interesting
g12732	sp|Q8CIS0|CAR11_MOUSE	0.979479	0.729223	Not Interesting
g1276	sp|Q96RW7|HMCN1_HUMAN	0.708129	0.494246	Not Interesting
g12783	sp|Q9ULC3|RAB23_HUMAN	0.60292	0.727295	Not Interesting
g12884	sp|P80513|MANF_BOVIN	1.17996	1.02552	Not Interesting
g12949	sp|Q8NHV1|GIMA7_HUMAN	0.65367	0.38607	Not Interesting
g12951	NA	2.45225	2.01892	Not Interesting
g12992	sp|P69478|CHSTB_RAT	2.33049	2.15056	Not Interesting
g1301	NA	1.3577	1.19179	Not Interesting
g13058	sp|H6BDU4|SODC_CAMDR	0.588173	0.433819	Not Interesting
g13063	NA	-0.440065	-0.490112	Not Interesting
g13065	sp|Q53H47|SETMR_HUMAN	3.13053	4.26677	Not Interesting
g13109	NA	-1.10309	-0.890717	Not Interesting
g13138	sp|P34743|BTG1_CHICK	1.00044	0.76981	Not Interesting
g13182	sp|Q9UHC3|ASIC3_HUMAN	0.792606	1.2682	Not Interesting
g1320	sp|Q8K007|SULF1_MOUSE	0.818508	0.539594	Not Interesting
g13229	sp|P09954|CBPA1_PIG	-0.785569	-0.267247	Not Interesting
g13247	sp|Q9KWN0|AHV_ACTSK	1.47752	1.20148	Not Interesting
g13250	sp|Q9KWN0|AHV_ACTSK	0.956358	0.812247	Not Interesting
g1338	sp|Q9GNN8|CTXA_CARAL	-0.626541	-0.509046	Not Interesting
g13433	NA	-0.430345	-0.476949	Not Interesting
g1349	sp|Q9BY15|AGRE3_HUMAN	0.850802	0.352342	Not Interesting
g13514	sp|Q9BX10|GTPB2_HUMAN	1.89734	1.52262	Not Interesting
g13520	NA	1.11795	1.27449	Not Interesting
g13585	sp|Q15760|GPR19_HUMAN	-1.04079	-0.604596	Not Interesting
g13587	sp|Q64121|PRLHR_RAT	1.26975	0.955722	Not Interesting
g13619	NA	2.66626	2.40939	Not Interesting
g13698	sp|Q804X9|OPN4A_GADMO	-0.720839	-0.617815	Not Interesting
g1374	sp|P19440|GGT1_HUMAN	-0.369635	-0.467543	Not Interesting
g13799	NA	2.38102	1.76605	Not Interesting
g13907	sp|O88866|HUNK_MOUSE	0.579531	0.593211	Not Interesting
g14018	sp|Q15063|POSTN_HUMAN	-2.39187	-1.39316	Not Interesting
g14048	sp|Q9UIK4|DAPK2_HUMAN	0.541577	0.856156	Not Interesting
g14107	sp|A8GCA7|RIMK_SERP5	0.589502	0.556298	Not Interesting
g14220	NA	5.10195	3.25309	Not Interesting
g14239	sp|Q9Y6W6|DUS10_HUMAN	0.998266	0.849546	Not Interesting
g14300	sp|Q9BSR8|YIPF4_HUMAN	0.653686	0.332833	Not Interesting
g14470	sp|P53690|MMP14_MOUSE	2.65889	2.15677	Not Interesting
g1450	sp|P18870|JUN_CHICK	2.88613	2.7525	Not Interesting
g14514	NA	-0.709239	-0.201897	Not Interesting
g1460	sp|Q9DBU3|RIOK3_MOUSE	0.615286	0.442831	Not Interesting
g1461	NA	3.71714	3.13401	Not Interesting
g14685	sp|Q08E39|SPY2_BOVIN	0.365878	0.509911	Not Interesting
g14746	sp|Q9H324|ATS10_HUMAN	-0.421422	-0.39924	Not Interesting
g14799	sp|Q86TX2|ACOT1_HUMAN	1.34552	0.808235	Not Interesting
g14800	sp|Q8CGB3|UACA_MOUSE	1.12686	0.926022	Not Interesting
g14801	sp|Q80WQ9|ZBED4_MOUSE	0.714081	0.549412	Not Interesting
g14866	sp|P25931|NPYR_DROME	-0.889865	-0.619961	Not Interesting
g14978	NA	1.21976	1.07957	Not Interesting
g15095	sp|P19440|GGT1_HUMAN	-0.444987	-0.507469	Not Interesting
g15129	sp|P32020|NLTP_MOUSE	0.604239	0.304544	Not Interesting
g15133	sp|Q6MG82|PRRT1_RAT	0.469403	0.335294	Not Interesting
g15145	NA	2.14827	2.26602	Not Interesting
g15181	sp|Q3SZE3|PLPP3_BOVIN	1.55028	1.29904	Not Interesting
g15206	NA	0.545295	0.491705	Not Interesting
g15221	sp|Q8NHS3|MFSD8_HUMAN	0.935401	0.697597	Not Interesting
g15226	sp|A6YP92|ARX_RAT	-0.622365	-0.510499	Not Interesting
g15331	sp|Q3T0J1|FBX4_BOVIN	1.18697	0.846715	Not Interesting
g15359	sp|O60481|ZIC3_HUMAN	-0.737772	-0.384399	Not Interesting
g1539	NA	-0.384544	-0.458922	Not Interesting
g15457	sp|O35815|ATX3_RAT	0.843399	0.704158	Not Interesting
g15458	sp|B2LU20|SFXN1_SHEEP	0.958337	0.598761	Not Interesting
g15494	sp|Q8N2E2|VWDE_HUMAN	1.77057	1.52842	Not Interesting
g15502	NA	-1.72678	-2.52025	Not Interesting
g15578	NA	-0.501755	-0.58676	Not Interesting
g15590	sp|P91953|HE_HEMPU	0.392716	0.795505	Not Interesting
g15603	sp|Q9QYF1|RDH11_MOUSE	0.375818	0.260144	Not Interesting
g15629	sp|P18519|TNR16_CHICK	1.48241	1.2164	Not Interesting
g15630	sp|H2A0N9|KCP4_PINMG	3.03939	2.10973	Not Interesting
g15640	sp|Q9YIB7|ZIC2B_XENLA	-0.650905	-0.334338	Not Interesting
g15667	sp|P54001|P4HA1_RAT	-0.358605	-0.441449	Not Interesting
g15668	sp|P10079|FBP1_STRPU	-0.46559	-0.442858	Not Interesting
g15679	NA	0.219949	0.446263	Not Interesting
g15773	NA	0.623017	0.649767	Not Interesting
g15840	sp|Q29H56|MAB21_DROPS	-2.18709	-1.51468	Not Interesting
g15894	sp|B5ZYI7|DUT_RHILW	2.8854	2.29176	Not Interesting
g15918	NA	-0.884759	-0.960815	Not Interesting
g15952	NA	1.40805	1.15244	Not Interesting
g15985	sp|Q496Y0|LONF3_HUMAN	0.806935	0.584623	Not Interesting
g16028	sp|P14099|PDE2A_BOVIN	-0.472252	-0.311791	Not Interesting
g1608	sp|P98155|VLDLR_HUMAN	0.380948	0.284294	Not Interesting
g16165	sp|Q61467|ZIC4_MOUSE	0.425646	2.30132	Not Interesting
g16168	sp|Q90593|GRP78_CHICK	0.930538	0.740933	Not Interesting
g16204	sp|D3YXG0|HMCN1_MOUSE	1.20818	0.929597	Not Interesting
g16224	sp|Q96P65|QRFPR_HUMAN	0.873312	0.52886	Not Interesting
g16229	NA	1.9128	0.878957	Not Interesting
g1624	sp|Q61115|PTC1_MOUSE	1.45031	1.33014	Not Interesting
g16442	sp|Q05826|CEBPB_CHICK	1.41833	1.21517	Not Interesting
g16491	sp|P51984|CREB_HYDVD	1.41483	1.47963	Not Interesting
g16493	NA	3.37354	3.93733	Not Interesting
g16557	sp|Q09604|VAB15_CAEEL	-1.94031	-1.2662	Not Interesting
g16578	sp|Q9DBS5|KLC4_MOUSE	0.875679	0.606972	Not Interesting
g16599	sp|C6FG12|NLRC5_ICTPU	1.05411	0.954273	Not Interesting
g16628	sp|P54846|NRL_MOUSE	0.899975	0.822386	Not Interesting
g16721	sp|P43378|PTN9_HUMAN	0.468317	0.310727	Not Interesting
g16879	sp|Q9VSF3|UBC12_DROME	2.78974	2.45172	Not Interesting
g16930	NA	0.825925	0.876101	Not Interesting
g1696	sp|O95490|AGRL2_HUMAN	-0.447746	-0.604046	Not Interesting
g16973	sp|Q6WZ18|NGB_CANLF	2.5875	3.69439	Not Interesting
g1705	sp|Q8N8A2|ANR44_HUMAN	0.449505	1.12427	Not Interesting
g17177	sp|Q9CXY1|TM175_MOUSE	1.22271	1.18734	Not Interesting
g1718	sp|P69478|CHSTB_RAT	3.38493	3.02115	Not Interesting
g17212	sp|Q18297|TRPA1_CAEEL	-0.474575	-0.537212	Not Interesting
g17270	sp|P00630|PA2_APIME	-0.838695	-0.921483	Not Interesting
g17348	sp|A0A0K3AWM6|MOM5_CAEEL	-1.02624	-0.621131	Not Interesting
g17349	sp|P62293|ASPM_PANTR	-1.06855	-0.681527	Not Interesting
g17372	sp|P55268|LAMB2_HUMAN	-0.447539	-0.534968	Not Interesting
g1742	sp|Q5XXP2|OPN4_PHOSU	0.867949	0.911136	Not Interesting
g17462	NA	1.12091	0.918217	Not Interesting
g17469	NA	1.3754	1.44721	Not Interesting
g17476	NA	-1.17579	-0.910506	Not Interesting
g17506	sp|P54707|AT12A_HUMAN	8.05207	6.30255	Not Interesting
g17588	sp|P70426|RIT1_MOUSE	0.544678	0.530317	Not Interesting
g17631	sp|Q9H4G4|GAPR1_HUMAN	-0.553163	-0.48835	Not Interesting
g17667	sp|Q3UGY8|BIG3_MOUSE	-0.465713	-0.489044	Not Interesting
g17774	sp|Q5BLE8|RETST_DANRE	0.637265	0.514306	Not Interesting
g17796	sp|Q20191|NAS13_CAEEL	2.88604	3.51481	Not Interesting
g1782	sp|P35668|GSHB_XENLA	-0.260651	-0.498172	Not Interesting
g17880	sp|Q2PFN5|SPY2_MACFA	1.11059	1.23589	Not Interesting
g17929	NA	1.27047	1.19277	Not Interesting
g17979	sp|P02510|CRYAB_BOVIN	2.2918	2.42992	Not Interesting
g17982	sp|P02510|CRYAB_BOVIN	0.827116	0.800472	Not Interesting
g17988	sp|P02510|CRYAB_BOVIN	1.38009	1.56568	Not Interesting
g17998	sp|P02510|CRYAB_BOVIN	2.14073	2.10838	Not Interesting
g18016	sp|Q11126|FUT3_BOVIN	-1.44822	-2.35151	Not Interesting
g18029	NA	0.551021	0.497574	Not Interesting
g18145	sp|P14381|YTX2_XENLA	0.956839	0.729935	Not Interesting
g18191	sp|Q9ZQF9|MBR1_ARATH	0.844027	0.28353	Not Interesting
g18200	sp|Q99578|RIT2_HUMAN	1.53002	1.37616	Not Interesting
g18215	sp|Q9BQS2|SYT15_HUMAN	1.09827	1.31077	Not Interesting
g18241	NA	0.851368	0.547764	Not Interesting
g18277	sp|Q9H4G4|GAPR1_HUMAN	1.08835	0.710922	Not Interesting
g18321	NA	0.525002	0.389999	Not Interesting
g18331	NA	0.423706	0.612148	Not Interesting
g18420	NA	-0.467121	-0.490729	Not Interesting
g18439	NA	-1.11698	-0.728315	Not Interesting
g18466	sp|P07524|TYRO_STRAT	7.42212	6.89396	Not Interesting
g18477	sp|Q5TJ56|FORF_DICDI	-0.841039	-0.779149	Not Interesting
g18524	NA	-0.587905	-0.410894	Not Interesting
g18525	sp|O15014|ZN609_HUMAN	-0.606834	-0.465572	Not Interesting
g18700	sp|Q9QXM0|ABHD2_MOUSE	0.528697	0.402112	Not Interesting
g1874	sp|P56945|BCAR1_HUMAN	0.409652	0.175862	Not Interesting
g18842	sp|Q6DID7|WLS_MOUSE	2.62642	2.19776	Not Interesting
g18947	sp|Q8NB14|UBP38_HUMAN	0.742856	0.69892	Not Interesting
g18951	sp|P38571|LICH_HUMAN	1.00876	0.940006	Not Interesting
g18982	sp|P34908|BRAF_COTJA	-0.76329	-0.680603	Not Interesting
g18986	sp|P15056|BRAF_HUMAN	-0.616097	-0.405468	Not Interesting
g19087	sp|Q6ZWL3|CP4V2_HUMAN	0.882278	0.853691	Not Interesting
g19089	sp|Q9DBW0|CP4V2_MOUSE	0.95635	0.809771	Not Interesting
g19261	sp|Q04892|SOX14_MOUSE	-0.691245	-0.529187	Not Interesting
g19265	sp|Q8NFT8|DNER_HUMAN	-0.30735	-0.391956	Not Interesting
g19275	sp|Q6NSM8|SIK3_DANRE	-0.519347	-0.380763	Not Interesting
g19288	sp|Q967D7|TUTL_DROME	0.607824	0.609466	Not Interesting
g19310	sp|Q01262|HYUA_PSESN	1.26007	1.19716	Not Interesting
g19355	NA	1.76062	1.54778	Not Interesting
g19392	sp|P96738|CAPA_BACSU	-0.640092	-0.534592	Not Interesting
g19421	sp|O08629|TIF1B_RAT	-0.837709	-0.692161	Not Interesting
g19422	NA	-0.758528	-0.560641	Not Interesting
g19496	sp|P63255|CRIP1_RAT	1.0561	1.08851	Not Interesting
g19531	NA	1.5583	1.46782	Not Interesting
g19542	sp|Q4R6I1|GIN1_MACFA	-0.838367	-0.834998	Not Interesting
g19568	NA	4.57203	3.3855	Not Interesting
g19596	sp|P15882|CHIN_HUMAN	1.44394	1.06379	Not Interesting
g19631	sp|P16423|POLR_DROME	1.06606	1.03555	Not Interesting
g1971	sp|Q9US12|YK66_SCHPO	0.335548	0.521912	Not Interesting
g19768	sp|P32254|RASS_DICDI	1.91627	1.68252	Not Interesting
g19781	NA	2.56077	2.25744	Not Interesting
g1979	sp|Q9UPW0|FOXJ3_HUMAN	-0.480738	-0.320335	Not Interesting
g19877	sp|P48442|CASR_RAT	-0.846972	-0.573894	Not Interesting
g1988	sp|O75840|KLF7_HUMAN	-0.631332	-0.519479	Not Interesting
g19890	NA	1.10371	1.17915	Not Interesting
g19927	sp|P06727|APOA4_HUMAN	2.42334	2.26055	Not Interesting
g19973	sp|P91953|HE_HEMPU	0.549132	1.22729	Not Interesting
g19984	sp|Q02225|SKI_XENLA	-0.94997	-0.936094	Not Interesting
g19992	sp|Q5SVZ6|ZMYM1_HUMAN	2.80309	3.16581	Not Interesting
g19993	sp|Q4R3D6|ZMYM5_MACFA	3.58017	6.04334	Not Interesting
g20012	NA	2.81088	2.53659	Not Interesting
g20035	NA	-1.423	-2.20266	Not Interesting
g20037	NA	1.81948	1.52082	Not Interesting
g20038	NA	2.32058	1.77099	Not Interesting
g20042	sp|Q66IY8|I2BLA_XENLA	0.578876	0.594899	Not Interesting
g20043	NA	-1.36682	-1.88456	Not Interesting
g20083	sp|O57525|CP17A_RANDY	2.53248	2.34818	Not Interesting
g20096	NA	0.850225	0.517657	Not Interesting
g2028	NA	0.700439	0.685371	Not Interesting
g2038	sp|P35400|GRM7_RAT	-0.652763	-0.541735	Not Interesting
g20428	sp|P41366|VMO1_CHICK	2.07363	1.70168	Not Interesting
g20473	sp|Q923S9|RAB30_MOUSE	1.96916	1.99514	Not Interesting
g20504	sp|Q1PRL4|LIN41_CHICK	0.414116	0.548627	Not Interesting
g20537	sp|Q08790|BLC_VIBCH	0.951746	0.844012	Not Interesting
g20552	sp|K7Z9Q9|VMP_NEMVE	0.382347	0.686036	Not Interesting
g20553	sp|P31579|LCE_ORYLA	0.315943	0.673169	Not Interesting
g20611	sp|B3EWZ8|ECT_ACRMI	3.38967	2.92082	Not Interesting
g2068	NA	0.805164	0.999224	Not Interesting
g20685	sp|P47032|PRY1_YEAST	0.425577	0.488836	Not Interesting
g20686	NA	-0.94895	-0.683973	Not Interesting
g20690	sp|Q6TXF1|ARRD3_RAT	1.01087	1.00047	Not Interesting
g20736	sp|P28175|LFC_TACTR	2.08226	1.86334	Not Interesting
g20769	sp|P78412|IRX6_HUMAN	-0.506151	-0.408856	Not Interesting
g20774	sp|Q55874|Y103_SYNY3	1.00633	0.773077	Not Interesting
g20792	sp|Q8IVN8|SBSPO_HUMAN	1.37854	0.825421	Not Interesting
g20794	sp|P83858|QRFPR_RAT	0.900186	0.412873	Not Interesting
g20816	sp|Q2VLG6|C163A_CANLF	0.741356	0.592794	Not Interesting
g20826	sp|Q2VLG6|C163A_CANLF	0.717237	0.549092	Not Interesting
g20832	sp|Q95218|DMBT1_RABIT	1.46896	1.77478	Not Interesting
g20911	sp|P23770|GATA2_XENLA	-1.83945	-1.34555	Not Interesting
g20916	sp|Q02650|PAX5_MOUSE	-0.530113	-0.472994	Not Interesting
g20987	NA	1.21228	1.09896	Not Interesting
g20995	sp|P46088|GST_NOTSL	0.93744	0.549746	Not Interesting
g21006	sp|Q9U518|ASPG_DIRIM	1.15716	1.05608	Not Interesting
g21055	sp|Q29RV1|PDIA4_BOVIN	0.399094	0.345597	Not Interesting
g21065	sp|Q5R9A4|DNJB9_PONAB	1.76601	1.40711	Not Interesting
g21076	sp|A4IIJ3|KIBRA_XENTR	-0.445385	-0.264969	Not Interesting
g21095	sp|Q6IE82|JADE3_MOUSE	-0.434567	-0.319366	Not Interesting
g21131	NA	-0.997814	-0.467845	Not Interesting
g21141	sp|Q9GRC0|MOS_PATPE	-0.607003	-0.632685	Not Interesting
g21163	NA	-1.79142	-1.54722	Not Interesting
g21174	sp|P43368|CAN3_PIG	1.04326	1.14305	Not Interesting
g21198	NA	0.93281	1.00019	Not Interesting
g21219	sp|Q90623|MYPT1_CHICK	3.13066	1.70715	Not Interesting
g21243	sp|Q5ZIE8|MCAF1_CHICK	0.472465	0.473631	Not Interesting
g21255	sp|Q9X4A5|BETL_LISMN	0.459641	0.404858	Not Interesting
g21274	sp|Q8BG95|MYPT2_MOUSE	0.67484	0.674382	Not Interesting
g21379	NA	1.50251	1.46854	Not Interesting
g21693	sp|O12946|P53_PLAFE	0.709176	0.644442	Not Interesting
g21760	sp|P55112|NAS4_CAEEL	0.1971	0.515846	Not Interesting
g21839	NA	-1.72128	-1.22075	Not Interesting
g2192	sp|Q8TE12|LMX1A_HUMAN	-0.655829	-0.560614	Not Interesting
g21976	sp|O95057|DIRA1_HUMAN	0.852699	0.705037	Not Interesting
g22058	sp|P10079|FBP1_STRPU	-0.454446	-0.396062	Not Interesting
g22086	sp|Q5XGS8|GTPB1_XENLA	0.930917	0.566368	Not Interesting
g22088	sp|D2XV59|GTPB1_RAT	0.759166	0.492553	Not Interesting
g22112	sp|Q91Z92|B3GT6_MOUSE	0.960404	0.749384	Not Interesting
g22114	NA	3.11145	3.27246	Not Interesting
g22197	sp|P07805|DCOR_TRYBB	1.09153	1.36794	Not Interesting
g22209	NA	0.493542	0.25273	Not Interesting
g22226	sp|P21369|PNCA_ECOLI	-1.13572	-0.865106	Not Interesting
g22256	sp|Q5ZLX4|ARHG3_CHICK	0.701933	0.370117	Not Interesting
g22258	sp|Q62165|DAG1_MOUSE	0.597513	0.3992	Not Interesting
g22300	sp|Q7SZ59|RASLC_DANRE	-0.518572	-0.362611	Not Interesting
g22317	sp|Q0VCJ7|RERG_BOVIN	2.31705	1.77627	Not Interesting
g22340	NA	1.39324	1.82651	Not Interesting
g22453	sp|Q0VBL1|TIGD2_MOUSE	0.93425	0.945993	Not Interesting
g22564	sp|A8Y5T1|CA194_DANRE	1.63419	1.98118	Not Interesting
g22585	sp|Q91Z46|DUS7_MOUSE	2.14821	1.62112	Not Interesting
g22615	sp|Q8HYJ7|FUT5_GORGO	0.917638	0.636118	Not Interesting
g22636	NA	0.590292	0.37484	Not Interesting
g22665	sp|Q9ES87|PRSS8_RAT	0.39978	0.44332	Not Interesting
g2273	NA	0.785101	0.59997	Not Interesting
g2274	NA	1.98599	1.94622	Not Interesting
g22869	NA	-1.07239	-0.808013	Not Interesting
g22933	sp|Q9NR82|KCNQ5_HUMAN	-0.672428	-0.739223	Not Interesting
g22934	NA	2.15766	2.07376	Not Interesting
g22990	sp|Q32PV0|GULP1_DANRE	0.524426	0.565828	Not Interesting
g23065	sp|A4IFD0|KAD5_BOVIN	0.292083	0.417989	Not Interesting
g23079	NA	2.82	2.4478	Not Interesting
g23088	sp|A2AJ15|MA1B1_MOUSE	0.422332	0.281415	Not Interesting
g23109	NA	0.54987	0.761771	Not Interesting
g23186	NA	0.75478	0.960578	Not Interesting
g23193	sp|P19246|NFH_MOUSE	-0.65221	-0.505095	Not Interesting
g2328	sp|P54864|JUN_SERCA	-0.5389	-0.470488	Not Interesting
g23304	sp|Q8CHN8|MASP1_RAT	1.83315	1.70586	Not Interesting
g23345	NA	-0.445963	-0.651641	Not Interesting
g23353	sp|Q9ES87|PRSS8_RAT	-0.735155	-0.35825	Not Interesting
g23366	sp|Q9CZR2|NALD2_MOUSE	-0.268538	-0.446466	Not Interesting
g23370	sp|Q9H4G4|GAPR1_HUMAN	-0.519823	-0.401231	Not Interesting
g23371	sp|Q9CYL5|GAPR1_MOUSE	-0.58378	-0.444528	Not Interesting
g234	sp|P05933|CALM_SCHPO	2.56059	2.03672	Not Interesting
g23421	sp|Q82P90|IABF_STRAW	2.87476	2.49154	Not Interesting
g23692	sp|Q8VIJ8|NPRL3_MOUSE	-0.375428	-0.249139	Not Interesting
g23720	sp|P79702|FOS_CYPCA	5.8924	5.76961	Not Interesting
g23856	NA	4.59644	4.14306	Not Interesting
g23857	NA	3.93815	5.48932	Not Interesting
g23859	sp|P02640|VILI_CHICK	-0.658145	0.101331	Not Interesting
g23878	sp|Q7ZZC8|NEK9_XENLA	0.621651	0.444408	Not Interesting
g23880	sp|Q8N129|CNPY4_HUMAN	-0.426654	-0.534813	Not Interesting
g23916	NA	1.79278	0.724199	Not Interesting
g2398	sp|D3YXG0|HMCN1_MOUSE	-0.436287	-0.496045	Not Interesting
g24024	sp|Q91X58|ZFN2B_MOUSE	4.50701	6.34255	Not Interesting
g24036	NA	2.00222	1.7468	Not Interesting
g24037	NA	0.847517	0.652413	Not Interesting
g24062	NA	1.49744	0.767999	Not Interesting
g24114	sp|Q28FN6|OTX2_XENTR	-0.987792	-0.788963	Not Interesting
g24126	sp|O42097|FOXA2_ORYLA	-0.884089	-0.69304	Not Interesting
g24130	sp|Q80ZD3|S2611_MOUSE	0.682106	0.652745	Not Interesting
g2419	sp|Q14209|E2F2_HUMAN	0.441924	0.327209	Not Interesting
g24191	sp|Q28107|FA5_BOVIN	2.65272	3.54873	Not Interesting
g24228	sp|Q6DFF6|KLH20_XENLA	-0.912526	-0.515799	Not Interesting
g24294	sp|Q9JHJ7|TEST_MOUSE	0.707598	0.512841	Not Interesting
g24323	NA	2.33357	2.15028	Not Interesting
g24335	sp|Q99501|GA2L1_HUMAN	0.709584	0.534273	Not Interesting
g24349	NA	2.01214	0.95019	Not Interesting
g24356	NA	-0.441483	-0.401176	Not Interesting
g24378	sp|O00222|GRM8_HUMAN	1.33621	1.10982	Not Interesting
g24398	sp|Q6INC8|VGLU1_XENLA	-0.373523	-0.428753	Not Interesting
g24399	NA	1.30262	0.808913	Not Interesting
g24406	sp|P11362|FGFR1_HUMAN	-0.666426	-0.673639	Not Interesting
g24453	NA	-0.266349	-0.594814	Not Interesting
g24454	NA	-0.267379	-0.499569	Not Interesting
g24476	sp|P10079|FBP1_STRPU	-0.87877	-0.75048	Not Interesting
g24547	sp|Q8WSF1|H33_TRIPS	0.860557	0.731507	Not Interesting
g24580	NA	1.41057	1.14839	Not Interesting
g24626	sp|P35033|TRY3_SALSA	-0.675675	-0.158221	Not Interesting
g24627	sp|P35033|TRY3_SALSA	-1.07029	-0.591043	Not Interesting
g24631	sp|Q6NRE4|GARE1_XENLA	-0.673291	-0.652687	Not Interesting
g2466	NA	2.64876	2.76335	Not Interesting
g24660	sp|Q6INU7|FRRS1_XENLA	0.756149	0.853071	Not Interesting
g24678	sp|Q04972|VIPA_SALTI	2.46035	2.09699	Not Interesting
g24679	sp|Q04973|VIPB_SALTI	0.544119	0.482128	Not Interesting
g24685	sp|Q86L51|RAPB_DICDI	1.71507	0.963479	Not Interesting
g24876	NA	0.960301	1.00314	Not Interesting
g24883	NA	1.46322	1.08277	Not Interesting
g24911	NA	0.759783	0.69659	Not Interesting
g25038	NA	5.48542	3.33821	Not Interesting
g25044	NA	2.22992	1.90743	Not Interesting
g25137	sp|Q28620|NPT2A_RABIT	0.920462	0.582315	Not Interesting
g25174	NA	-0.625931	-0.471119	Not Interesting
g25176	sp|Q5RBA5|SQSTM_PONAB	1.77211	1.70202	Not Interesting
g25238	sp|Q08D62|MAEL_XENTR	-0.632036	-0.727006	Not Interesting
g25321	NA	1.51846	1.10778	Not Interesting
g25356	sp|P35555|FBN1_HUMAN	1.30777	0.965748	Not Interesting
g25359	sp|P52272|HNRPM_HUMAN	2.60775	2.55951	Not Interesting
g25364	sp|P41041|CALM_PNECA	0.983266	0.657421	Not Interesting
g25416	sp|P24802|PLOD1_CHICK	0.509904	0.362008	Not Interesting
g25482	sp|Q865C0|CAH6_CANLF	-0.684729	-0.86719	Not Interesting
g25532	sp|O95980|RECK_HUMAN	-0.715879	-0.657401	Not Interesting
g25556	sp|A7E2S9|A30BL_HUMAN	0.724411	0.538768	Not Interesting
g25557	sp|Q9H1Y3|OPN3_HUMAN	1.95359	2.09251	Not Interesting
g25564	NA	3.56228	2.58644	Not Interesting
g25666	sp|O95490|AGRL2_HUMAN	1.08284	0.879596	Not Interesting
g2575	sp|A1XQX0|NR1AA_DANRE	-1.00053	-0.686081	Not Interesting
g25771	sp|P38977|ANTA_HYDVU	0.577982	0.0940225	Not Interesting
g25773	sp|P38977|ANTA_HYDVU	0.631373	0.283729	Not Interesting
g25870	NA	1.41401	0.958498	Not Interesting
g25893	NA	2.87227	2.64866	Not Interesting
g25899	sp|Q9ZDZ8|Y165_RICPR	0.579761	0.582843	Not Interesting
g25927	NA	-0.616627	-0.477163	Not Interesting
g25945	NA	3.94708	4.94795	Not Interesting
g26038	sp|Q99MT8|MRGRH_MOUSE	-1.07218	-0.921817	Not Interesting
g26061	sp|P48740|MASP1_HUMAN	1.82143	1.66509	Not Interesting
g26213	sp|O75486|SUPT3_HUMAN	-0.512134	-0.286931	Not Interesting
g2623	NA	2.01819	1.96803	Not Interesting
g26250	NA	1.61704	1.10957	Not Interesting
g26294	sp|Q9H0J9|PAR12_HUMAN	0.414909	0.389157	Not Interesting
g26375	sp|Q6NWZ9|CDO1_DANRE	1.27673	0.839579	Not Interesting
g26401	NA	1.53442	0.875614	Not Interesting
g26569	sp|Q96UM2|LAC3_BOTFU	0.577515	0.487044	Not Interesting
g26573	sp|Q96WM9|LAC2_BOTFU	0.983573	0.664291	Not Interesting
g26783	sp|Q4R6I1|GIN1_MACFA	-1.03399	-0.645871	Not Interesting
g26784	sp|C9D7R3|VMPA3_LOXIN	0.925909	1.21078	Not Interesting
g26798	sp|P35320|OXIR_STRLI	1.69683	1.44543	Not Interesting
g26799	sp|Q03326|OXIR_STRAT	1.66579	1.31231	Not Interesting
g26809	NA	0.861819	0.794778	Not Interesting
g26848	NA	0.337404	0.846662	Not Interesting
g26858	sp|P42289|DRD1_XENLA	1.20085	1.04069	Not Interesting
g26881	sp|O14924|RGS12_HUMAN	1.13014	0.881235	Not Interesting
g26882	sp|Q2KHW7|RGS10_BOVIN	0.587418	0.47514	Not Interesting
g26884	sp|Q6DN14|MCTP1_HUMAN	0.380175	0.279212	Not Interesting
g26936	sp|P07207|NOTCH_DROME	-0.518018	-0.417853	Not Interesting
g270	sp|P86925|RLGM2_TRYB2	2.01217	1.94323	Not Interesting
g2705	sp|Q7Z494|NPHP3_HUMAN	1.15577	1.09946	Not Interesting
g27312	NA	-0.720741	-0.74778	Not Interesting
g27534	NA	1.40875	1.16461	Not Interesting
g27552	sp|Q8NB59|SYT14_HUMAN	0.577668	0.428573	Not Interesting
g2762	NA	-0.887933	-0.836198	Not Interesting
g27649	sp|O04714|GCR1_ARATH	2.17013	1.19545	Not Interesting
g27757	NA	3.35975	3.28914	Not Interesting
g27772	sp|Q24040|BGB_DROME	3.22315	2.49245	Not Interesting
g27778	sp|Q03427|LAMC_DROME	0.851187	1.14084	Not Interesting
g27779	NA	0.501259	0.807945	Not Interesting
g27784	sp|Q9BSE4|HERP2_HUMAN	0.493993	0.433924	Not Interesting
g27790	sp|A5WFR0|PIF1_PSYWF	-0.366191	-0.620976	Not Interesting
g27827	sp|Q5EA92|AL14E_BOVIN	2.05841	1.81771	Not Interesting
g2784	NA	-0.600742	-0.684552	Not Interesting
g2786	NA	-0.534877	-0.16409	Not Interesting
g27863	sp|O62809|OX2R_PIG	2.36308	1.63071	Not Interesting
g2790	sp|O43422|P52K_HUMAN	4.89174	4.84629	Not Interesting
g2792	sp|Q80YA8|CRUM2_MOUSE	-0.481641	-0.679301	Not Interesting
g27920	sp|Q9ESD1|PRSS8_MOUSE	0.928245	0.936181	Not Interesting
g2795	NA	0.840547	0.609541	Not Interesting
g28001	sp|P21328|RTJK_DROME	5.51599	0.697526	Not Interesting
g28007	sp|B2RXA1|PLCX2_MOUSE	0.749204	0.371228	Not Interesting
g28009	sp|Q9VCE9|UBS3A_DROME	-0.695752	-0.4137	Not Interesting
g28064	sp|P17553|WNT3_MOUSE	1.52592	2.32947	Not Interesting
g28068	NA	-0.779408	-0.729248	Not Interesting
g28082	sp|Q8N584|TT39C_HUMAN	0.861011	0.447585	Not Interesting
g2810	NA	1.20386	0.997802	Not Interesting
g28136	sp|Q9NQW6|ANLN_HUMAN	0.821582	0.75419	Not Interesting
g28166	sp|Q8W257|PFI_PTIFI	2.24813	2.30763	Not Interesting
g28168	sp|E7FAM5|LIN41_DANRE	-0.391103	-0.507679	Not Interesting
g28232	NA	0.787306	0.433017	Not Interesting
g28253	NA	-0.650453	-0.559279	Not Interesting
g28273	NA	2.15996	2.27158	Not Interesting
g2830	sp|P10090|WHITE_DROME	0.762135	0.635321	Not Interesting
g28368	sp|Q5ZL67|NF2L1_CHICK	0.670452	0.594789	Not Interesting
g28449	sp|P32028|FD4_DROME	-2.31598	-1.63012	Not Interesting
g28498	sp|Q78KK3|S22AI_MOUSE	-0.521049	-0.570651	Not Interesting
g2866	NA	0.834122	0.834358	Not Interesting
g28711	sp|Q3UHC7|DAB2P_MOUSE	0.670781	0.633424	Not Interesting
g28716	NA	4.88719	4.24818	Not Interesting
g28717	NA	3.10328	3.46309	Not Interesting
g28767	sp|Q9ERQ8|CAH7_MOUSE	-0.624039	-0.638712	Not Interesting
g28768	sp|P43166|CAH7_HUMAN	-0.65365	-0.767838	Not Interesting
g28783	NA	3.01872	3.02036	Not Interesting
g28784	NA	4.00293	3.28639	Not Interesting
g28785	NA	2.93378	2.74295	Not Interesting
g28786	sp|P35285|RB22A_MOUSE	0.591895	0.456289	Not Interesting
g28791	NA	2.51551	2.7556	Not Interesting
g28800	sp|O60494|CUBN_HUMAN	-0.422149	-0.600294	Not Interesting
g28828	sp|Q8WXR4|MYO3B_HUMAN	2.16045	1.80807	Not Interesting
g28992	sp|O76360|EGL4_CAEEL	0.986243	1.06344	Not Interesting
g2906	sp|Q504Y0|S39AC_HUMAN	0.562512	0.527619	Not Interesting
g29061	NA	0.462061	0.855302	Not Interesting
g2908	sp|Q6PEH9|S39AA_DANRE	1.04694	0.883461	Not Interesting
g29169	NA	-0.554818	-0.694249	Not Interesting
g292	NA	1.26229	1.15358	Not Interesting
g29234	sp|Q28E95|SH3R1_XENTR	0.799961	0.506993	Not Interesting
g29266	sp|P51830|ADCY9_MOUSE	0.851213	0.695125	Not Interesting
g29308	sp|Q4L235|ACSF4_HUMAN	2.10445	1.89097	Not Interesting
g29309	sp|Q8TB61|S35B2_HUMAN	0.944451	0.67924	Not Interesting
g29383	sp|Q7T3Q7|OPSO_RUTRU	0.600213	0.565775	Not Interesting
g2943	sp|Q62908|CSRP2_RAT	0.862222	0.787271	Not Interesting
g29448	sp|Q24799|MYPH_ECHGR	0.754096	0.63518	Not Interesting
g2945	sp|P47032|PRY1_YEAST	-0.341846	-0.500964	Not Interesting
g29473	sp|Q6XL41|RHCG_CHICK	0.354337	0.338591	Not Interesting
g29487	sp|A6QNS3|ABR_BOVIN	7.87545	7.50892	Not Interesting
g29527	sp|Q8VE97|SRSF4_MOUSE	0.493528	0.44675	Not Interesting
g2954	sp|P32738|CLAT_RAT	4.77307	4.82189	Not Interesting
g2955	NA	-0.547191	-0.5894	Not Interesting
g2956	NA	-0.661109	-0.585544	Not Interesting
g29567	sp|Q9VUL9|FUCTA_DROME	1.19964	0.890114	Not Interesting
g2959	NA	-0.58456	-0.661727	Not Interesting
g29590	NA	-1.69764	-1.07377	Not Interesting
g296	sp|B2RYD2|ESRP1_RAT	0.605409	0.587764	Not Interesting
g29635	sp|O64411|PAO_MAIZE	0.52422	0.371774	Not Interesting
g29750	sp|Q98SN7|WNT2B_CHICK	3.30326	2.77463	Not Interesting
g29778	NA	0.512179	0.896679	Not Interesting
g2978	sp|P55115|NAS15_CAEEL	0.623483	1.27384	Not Interesting
g29781	sp|Q05AS8|DVL2_XENTR	0.618782	0.371542	Not Interesting
g2980	NA	-0.581808	-0.528816	Not Interesting
g29837	NA	1.23955	1.06082	Not Interesting
g2984	NA	-0.51968	-0.562809	Not Interesting
g2988	NA	-0.506587	-0.497806	Not Interesting
g29976	sp|Q8WWL2|SPIR2_HUMAN	4.31665	3.9728	Not Interesting
g30200	sp|P23978|SC6A1_RAT	0.417966	0.420231	Not Interesting
g30243	sp|Q24799|MYPH_ECHGR	1.2909	1.00364	Not Interesting
g30298	sp|P31696|AGRIN_CHICK	0.606948	0.0844607	Not Interesting
g30307	NA	-0.497108	-0.304043	Not Interesting
g30359	sp|P29558|RBMS1_HUMAN	0.632454	0.499156	Not Interesting
g30398	sp|P02510|CRYAB_BOVIN	1.9923	2.18281	Not Interesting
g30409	sp|P48442|CASR_RAT	2.50382	2.27049	Not Interesting
g30414	sp|P48442|CASR_RAT	-1.43719	-0.838786	Not Interesting
g30415	sp|P13944|COCA1_CHICK	0.742402	1.23958	Not Interesting
g30570	NA	1.65119	1.4932	Not Interesting
g30584	sp|Q3UVC0|KSR2_MOUSE	-0.63633	-0.188386	Not Interesting
g30630	sp|P42674|BP10_PARLI	0.442161	0.577329	Not Interesting
g30639	sp|Q20191|NAS13_CAEEL	0.425925	0.548641	Not Interesting
g30674	sp|B3STU3|CHAC1_RAT	1.52863	1.44063	Not Interesting
g30700	sp|Q9BY84|DUS16_HUMAN	1.28895	1.13314	Not Interesting
g30735	sp|Q9H9D4|ZN408_HUMAN	-0.426335	-0.348616	Not Interesting
g30956	sp|E7FAM5|LIN41_DANRE	-0.315685	-0.430498	Not Interesting
g3099	sp|Q9QYS2|GRM3_MOUSE	-0.617242	-0.701384	Not Interesting
g31085	NA	-0.82831	-0.792414	Not Interesting
g31086	NA	-0.875052	-0.75796	Not Interesting
g31273	sp|Q8UVC3|INVS_CHICK	0.835821	0.609852	Not Interesting
g31283	sp|Q9BT88|SYT11_HUMAN	0.995553	0.750723	Not Interesting
g31320	NA	1.42976	1.73587	Not Interesting
g31352	sp|Q9Z0J1|RECK_MOUSE	-0.435583	-0.408676	Not Interesting
g31392	sp|Q6NRD3|SH3R1_XENLA	0.691672	0.660377	Not Interesting
g31440	sp|P25931|NPYR_DROME	-0.5153	-0.574476	Not Interesting
g31631	sp|Q9BRS8|LARP6_HUMAN	1.19888	1.06955	Not Interesting
g31632	sp|Q8AVU4|HES1B_XENLA	-0.827706	-0.37217	Not Interesting
g31652	sp|Q94126|CES2_CAEEL	3.21816	3.24172	Not Interesting
g31686	NA	-0.96657	-1.04939	Not Interesting
g31735	sp|O57321|EAA1_AMBTI	-0.441558	-0.415641	Not Interesting
g31745	NA	0.915175	0.49338	Not Interesting
g31900	sp|P23327|SRCH_HUMAN	0.707294	0.429214	Not Interesting
g31940	NA	1.48107	1.11073	Not Interesting
g32069	sp|Q6AZB8|HARB1_DANRE	2.45866	1.78963	Not Interesting
g32158	sp|P51399|LOX5_MESAU	1.71678	1.61363	Not Interesting
g3223	NA	-0.741109	-1.03316	Not Interesting
g32238	NA	2.03488	1.45588	Not Interesting
g32264	NA	1.75341	2.00997	Not Interesting
g32265	sp|Q8IWL3|HSC20_HUMAN	0.498664	0.195347	Not Interesting
g32290	sp|Q96PN7|TREF1_HUMAN	-0.5973	-0.437661	Not Interesting
g32320	NA	1.03419	0.717832	Not Interesting
g32336	sp|Q9H5L6|THAP9_HUMAN	1.93121	1.62957	Not Interesting
g32344	NA	4.49085	3.77439	Not Interesting
g32585	sp|Q9Z125|CR3L1_MOUSE	1.23644	1.25684	Not Interesting
g326	sp|Q9Z2E3|ERN2_MOUSE	-0.781726	-0.579353	Not Interesting
g32841	NA	2.21076	2.65035	Not Interesting
g329	NA	1.66951	1.96199	Not Interesting
g32907	NA	1.93108	2.04112	Not Interesting
g33059	sp|Q28043|AVR2A_BOVIN	0.874868	0.621202	Not Interesting
g3306	NA	2.069	2.86221	Not Interesting
g33106	sp|Q15760|GPR19_HUMAN	-0.651131	-0.615553	Not Interesting
g33168	NA	1.1909	1.35623	Not Interesting
g33174	sp|F4IZC4|BASS4_ARATH	0.97975	0.773379	Not Interesting
g3318	NA	2.07757	2.47194	Not Interesting
g33206	sp|Q8VCL5|S17A9_MOUSE	0.69278	0.391723	Not Interesting
g33271	NA	1.0219	0.497042	Not Interesting
g33275	sp|Q8VCK5|KLH20_MOUSE	1.73392	1.49373	Not Interesting
g33278	sp|Q6PHE8|CC124_DANRE	0.592143	0.429977	Not Interesting
g33328	NA	1.04844	0.740183	Not Interesting
g33373	sp|P56706|WNT7B_HUMAN	2.61143	4.77038	Not Interesting
g33396	sp|Q28EM7|OTX5_XENTR	-0.615816	-0.318493	Not Interesting
g33422	sp|Q62445|SP4_MOUSE	1.00957	0.417273	Not Interesting
g33450	sp|A6QNK1|G3ST1_BOVIN	-0.425818	-0.769451	Not Interesting
g3347	sp|Q7KTX8|MED13_DROME	-0.580268	-0.375996	Not Interesting
g33581	NA	3.68952	4.01753	Not Interesting
g33633	NA	-0.709262	-0.631283	Not Interesting
g33661	sp|Q5R733|CPEB1_PONAB	1.29487	1.20217	Not Interesting
g33690	sp|P21328|RTJK_DROME	-1.32319	-1.14939	Not Interesting
g33749	sp|G5EGQ6|TEN1_CAEEL	0.487564	0.600381	Not Interesting
g33798	NA	0.640982	0.892327	Not Interesting
g33803	NA	-0.96049	-1.06117	Not Interesting
g3411	NA	-0.360297	-0.459949	Not Interesting
g3414	sp|Q20JQ7|SC4AB_DANRE	0.771951	0.640704	Not Interesting
g3419	sp|Q9VAI0|GNA1_DROME	1.49936	1.03631	Not Interesting
g3424	NA	1.93538	1.06826	Not Interesting
g3432	NA	0.67076	0.588311	Not Interesting
g3660	NA	1.04288	1.11265	Not Interesting
g3694	NA	0.495168	0.928925	Not Interesting
g370	sp|Q68US5|EVA1C_PANTR	-0.565285	-0.621374	Not Interesting
g3709	NA	0.988187	0.767051	Not Interesting
g3710	sp|P38977|ANTA_HYDVU	2.22849	2.05876	Not Interesting
g3780	NA	2.37148	2.17268	Not Interesting
g3847	sp|A4QNP7|DMTA2_XENTR	-0.538113	-0.363291	Not Interesting
g3858	NA	-0.619029	-0.783589	Not Interesting
g3893	sp|Q8GXG1|ASPGB_ARATH	7.31135	6.87953	Not Interesting
g3894	sp|P94252|YHIT_BORBU	0.809867	0.734986	Not Interesting
g3970	NA	0.419122	0.953356	Not Interesting
g3981	sp|P58659|EVA1C_MOUSE	-0.323702	-0.406591	Not Interesting
g4003	sp|Q63475|PTPR2_RAT	0.506412	0.491108	Not Interesting
g4004	sp|Q16820|MEP1B_HUMAN	-1.10487	-0.591959	Not Interesting
g4015	NA	-1.02793	-0.973158	Not Interesting
g4024	NA	-0.780262	-0.400334	Not Interesting
g4036	sp|O02213|SER2_CAEEL	-0.80824	-0.783656	Not Interesting
g4057	NA	0.893155	0.468392	Not Interesting
g4081	sp|Q6P950|PR3CB_DANRE	0.896577	1.2743	Not Interesting
g4304	sp|Q04771|ACVR1_HUMAN	-0.744738	-0.678582	Not Interesting
g4318	NA	1.87253	1.25554	Not Interesting
g4319	NA	1.54768	0.958401	Not Interesting
g4323	NA	1.18291	1.02874	Not Interesting
g4324	sp|P22274|ARF_CANAL	7.04302	7.02117	Not Interesting
g434	sp|Q5RD97|RN219_PONAB	0.492521	0.49631	Not Interesting
g4469	NA	2.52223	3.45676	Not Interesting
g457	NA	-0.874461	-0.298889	Not Interesting
g4571	NA	1.28789	0.966735	Not Interesting
g4573	NA	2.01362	2.32288	Not Interesting
g46	sp|Q86WA9|S2611_HUMAN	1.93167	1.35408	Not Interesting
g4632	NA	1.03065	0.797815	Not Interesting
g4647	NA	0.875529	0.452842	Not Interesting
g4679	sp|Q7U6F4|RIMK_SYNPX	0.761307	0.443804	Not Interesting
g4713	sp|Q9ULH7|MKL2_HUMAN	0.392406	0.441702	Not Interesting
g4715	NA	4.28027	4.31153	Not Interesting
g4765	sp|P50430|ARSB_RAT	-0.493162	-0.426926	Not Interesting
g4815	sp|Q9VW26|OAT_DROME	1.39569	1.06257	Not Interesting
g4856	sp|Q9ESM0|IP6K1_RAT	0.806521	0.527778	Not Interesting
g4917	sp|P25723|TLD_DROME	-1.5575	-1.05372	Not Interesting
g4922	sp|D3ZHV2|MACF1_RAT	0.62304	0.534952	Not Interesting
g502	sp|Q7ZUV7|EMSY_DANRE	-0.423407	-0.300038	Not Interesting
g503	sp|P33277|GAP1_SCHPO	1.48517	1.34641	Not Interesting
g506	sp|O57525|CP17A_RANDY	2.84818	2.43985	Not Interesting
g507	sp|P48430|SOX2_CHICK	-0.610363	-0.326519	Not Interesting
g5106	sp|Q14586|ZN267_HUMAN	0.614967	0.38496	Not Interesting
g5180	NA	0.522082	0.466407	Not Interesting
g52	sp|Q9GKE1|MMP27_TUPBE	-0.959145	-0.310945	Not Interesting
g5225	sp|Q4KWL2|ADRB2_TSCTR	-0.567227	-0.450045	Not Interesting
g5257	NA	0.80687	1.42063	Not Interesting
g53	sp|Q9GKE1|MMP27_TUPBE	-1.1084	-0.338056	Not Interesting
g530	sp|A1Z6E0|GUS_DROME	0.501742	0.344782	Not Interesting
g5350	sp|Q8C5H1|ANO4_MOUSE	-0.586198	-0.510901	Not Interesting
g5401	NA	-1.33029	-0.757231	Not Interesting
g5403	sp|Q76KP1|B4GN4_HUMAN	2.15069	1.87034	Not Interesting
g5411	NA	1.33079	1.28186	Not Interesting
g5455	NA	0.940668	0.894726	Not Interesting
g5459	NA	-0.436062	-0.736138	Not Interesting
g5466	sp|Q9GNN8|CTXA_CARAL	-0.377044	-0.522911	Not Interesting
g5478	NA	-0.483753	-0.607254	Not Interesting
g5483	sp|Q9GNN8|CTXA_CARAL	-0.497947	-0.61376	Not Interesting
g5500	sp|Q84UV8|NEC3_NICLS	-1.181	-1.16051	Not Interesting
g5525	sp|P11308|ERG_HUMAN	1.38485	0.974807	Not Interesting
g5530	sp|Q27968|DNJC3_BOVIN	0.632763	0.451044	Not Interesting
g557	NA	-0.892499	-0.598428	Not Interesting
g5660	sp|A8TX70|CO6A5_HUMAN	0.763788	0.663235	Not Interesting
g5697	sp|B8V7P3|CAH_ACRMI	-0.917914	-0.876178	Not Interesting
g5698	NA	-0.985325	-0.921395	Not Interesting
g5735	sp|O54834|RHG06_MOUSE	-1.15616	-0.980009	Not Interesting
g5757	sp|P32794|AFG2_YEAST	0.536595	0.427677	Not Interesting
g586	NA	-0.522264	-0.651482	Not Interesting
g5880	NA	-0.590796	-0.925965	Not Interesting
g5882	sp|Q9PVW8|SAL_SILAS	1.23382	1.11331	Not Interesting
g5897	sp|Q61830|MRC1_MOUSE	0.733034	1.07833	Not Interesting
g590	sp|Q58CW6|CARTF_BOVIN	-0.680551	-0.627912	Not Interesting
g5947	sp|Q626N3|TM151_CAEBR	1.55326	1.3743	Not Interesting
g6003	NA	-0.778687	-0.959227	Not Interesting
g604	NA	-0.52921	-0.513914	Not Interesting
g6120	sp|D3YXS5|KIF28_MOUSE	0.711096	0.95316	Not Interesting
g6138	NA	2.21752	1.70171	Not Interesting
g6164	sp|Q9UHC6|CNTP2_HUMAN	-0.721489	-0.498061	Not Interesting
g6182	NA	0.562449	1.27349	Not Interesting
g6228	sp|Q9U3S9|NAS6_CAEEL	2.20232	3.08896	Not Interesting
g6256	NA	1.44846	1.42783	Not Interesting
g6268	NA	2.22471	2.30201	Not Interesting
g6269	NA	1.4822	1.97756	Not Interesting
g6282	NA	-0.700241	-0.633756	Not Interesting
g6320	sp|P35317|AT1A_HYDVU	0.653584	0.689225	Not Interesting
g6351	sp|Q9P2E2|KIF17_HUMAN	-0.404639	-0.691707	Not Interesting
g6403	NA	-0.487728	-0.268688	Not Interesting
g6472	sp|P19327|5HT1A_RAT	1.2971	1.05927	Not Interesting
g6571	sp|Q9JLG8|CAN15_MOUSE	0.381568	0.538594	Not Interesting
g6623	sp|Q32KJ8|ARSI_RAT	-0.484834	-0.566247	Not Interesting
g6624	NA	-0.494226	-0.551759	Not Interesting
g6653	sp|Q10741|ADA10_BOVIN	0.409962	0.336439	Not Interesting
g6659	sp|Q8HXX6|SAP3_MACFA	0.191104	0.8526	Not Interesting
g6732	sp|Q54KA7|SECG_DICDI	4.30344	3.23601	Not Interesting
g6779	NA	3.95922	5.22477	Not Interesting
g682	sp|Q5XXP2|OPN4_PHOSU	-0.835222	-0.622811	Not Interesting
g6846	NA	0.888433	0.544225	Not Interesting
g69	sp|O57460|TLL1_DANRE	0.174416	0.472896	Not Interesting
g6940	sp|A6QPT7|ERAP2_BOVIN	-0.386965	-0.53239	Not Interesting
g6980	NA	-0.91324	-0.838486	Not Interesting
g710	sp|Q9NBX4|RTXE_DROME	1.48232	1.17418	Not Interesting
g7113	sp|Q9P267|MBD5_HUMAN	-0.532549	-0.42862	Not Interesting
g7119	sp|O60239|3BP5_HUMAN	1.43267	1.3066	Not Interesting
g712	NA	1.42308	1.22704	Not Interesting
g7122	sp|Q5SVZ6|ZMYM1_HUMAN	1.8761	2.33959	Not Interesting
g7128	sp|Q6PF45|VIAAT_XENLA	1.24455	0.605426	Not Interesting
g7149	sp|A1DWM3|MFSD6_PIG	-0.359693	-0.422593	Not Interesting
g7188	NA	3.81825	4.22987	Not Interesting
g726	NA	0.975528	0.877701	Not Interesting
g7262	sp|P35224|CTNB_URECA	0.689335	0.523479	Not Interesting
g7294	NA	2.27112	2.55033	Not Interesting
g7321	sp|P41594|GRM5_HUMAN	-0.914427	-0.724272	Not Interesting
g734	sp|Q8VHI4|CARTF_MOUSE	-0.662269	-0.224677	Not Interesting
g7398	sp|Q27128|PAPSS_URECA	0.478223	0.352606	Not Interesting
g7422	sp|Q55GQ6|UPP_DICDI	0.467951	0.516459	Not Interesting
g7427	NA	-0.515001	-0.550611	Not Interesting
g7456	sp|D3YXG0|HMCN1_MOUSE	-0.560688	-0.510305	Not Interesting
g7600	sp|A2AVA0|SVEP1_MOUSE	-0.516209	-0.20953	Not Interesting
g7649	sp|B3EWY9|MLP_ACRMI	3.02589	2.82911	Not Interesting
g7660	NA	-0.673714	-0.492587	Not Interesting
g7675	sp|P42128|FOXK1_MOUSE	-0.611992	-0.415204	Not Interesting
g7723	sp|Q8BH16|FBXL2_MOUSE	-0.721844	-0.419196	Not Interesting
g7775	sp|O02703|BAX_BOVIN	0.55242	0.362773	Not Interesting
g7820	sp|Q8CHL0|FZD5_RAT	-0.518291	-0.322658	Not Interesting
g7832	sp|O95267|GRP1_HUMAN	0.610478	0.307125	Not Interesting
g79	sp|Q9C0F3|ZN436_HUMAN	1.13677	0.895846	Not Interesting
g7964	sp|Q03717|KCNB1_MOUSE	0.987878	1.15596	Not Interesting
g7977	sp|Q9R0S2|MMP24_MOUSE	3.49328	3.31947	Not Interesting
g7978	sp|O77592|S35A3_CANLF	0.944749	0.77613	Not Interesting
g8051	sp|Q58DD2|S2611_BOVIN	0.421845	0.776677	Not Interesting
g8201	sp|Q496Y0|LONF3_HUMAN	1.16532	0.520342	Not Interesting
g8427	sp|Q8JI28|TLL1_XENLA	1.80588	1.64374	Not Interesting
g8550	sp|Q9UHC3|ASIC3_HUMAN	1.40737	0.832162	Not Interesting
g856	sp|Q503V9|ENDUB_DANRE	0.928945	0.902872	Not Interesting
g8620	NA	-0.702884	-0.540311	Not Interesting
g8661	sp|Q9P2J8|ZN624_HUMAN	-0.808265	-0.518359	Not Interesting
g8682	NA	-0.440958	-0.586052	Not Interesting
g87	sp|Q4KMC4|GFPT2_RAT	0.992155	0.422422	Not Interesting
g8768	sp|Q1KKZ3|HXA9B_TAKRU	-0.610146	-0.37771	Not Interesting
g8869	NA	-0.841711	-0.638131	Not Interesting
g8909	NA	-0.892292	-0.615288	Not Interesting
g8915	NA	-0.636429	-0.847908	Not Interesting
g8917	sp|P48800|FGF2_CHICK	2.09825	2.07846	Not Interesting
g8942	sp|O94844|RHBT1_HUMAN	0.853613	0.348388	Not Interesting
g8947	sp|Q5ZKX1|CHM1B_CHICK	0.727597	0.672411	Not Interesting
g8968	sp|P55112|NAS4_CAEEL	0.701371	0.479868	Not Interesting
g900	sp|P34743|BTG1_CHICK	0.465112	0.488896	Not Interesting
g9042	sp|P21328|RTJK_DROME	-1.84244	8.69382	Not Interesting
g9063	sp|Q9UPI3|FLVC2_HUMAN	2.59573	1.74986	Not Interesting
g9117	NA	0.886965	0.879647	Not Interesting
g9118	NA	3.9812	2.27107	Not Interesting
g9169	sp|Q8UWA5|CAH2_TRIHK	2.77272	2.46393	Not Interesting
g9388	sp|Q9MYY0|HPSE_BOVIN	0.662918	1.42505	Not Interesting
g9394	sp|Q12982|BNIP2_HUMAN	0.713997	0.521947	Not Interesting
g9406	sp|A2VDS1|SCLY_BOVIN	0.534853	0.616801	Not Interesting
g9425	sp|P48547|KCNC1_HUMAN	2.17183	2.17025	Not Interesting
g947	sp|P61150|FGF12_RAT	0.72267	0.465527	Not Interesting
g9493	NA	-0.676362	-0.350559	Not Interesting
g9565	sp|Q27746|DNMT1_PARLI	0.475316	0.487826	Not Interesting
g9572	sp|P26436|ASPX_HUMAN	0.728623	0.274257	Not Interesting
g9759	NA	-1.05004	-0.683512	Not Interesting
g9832	sp|Q5SF07|IF2B2_MOUSE	0.44328	0.20977	Not Interesting
g9857	sp|P39795|TREC_BACSU	1.41822	1.27007	Not Interesting
g9883	NA	0.767125	0.816798	Not Interesting
g9900	sp|P0CF95|BICL1_DANRE	1.2529	0.87314	Not Interesting
g9971	sp|Q5TC82|RC3H1_HUMAN	0.561164	0.412265	Not Interesting
g9972	NA	0.514748	0.363676	Not Interesting

## Sheet: Fig. 1D
Peak ID	Gene ID	Swissprot Annotation	Foot Reg logFC	Head Reg logFC	Structural Enrichment
10	g5778	NA	-1.10224	-1.12159	Not Interesting
100035	g31462	sp|P17126|ACT_HYDVU	0.53359	0.45151	Not Interesting
100038	g31462	sp|P17126|ACT_HYDVU	0.741897	0.362503	Not Interesting
100047	g31464	sp|Q149F3|ERF3B_MOUSE	-1.67399	-1.20271	Not Interesting
10009	NA	NA	0.477881	0.600225	Not Interesting
100090	g31120	sp|Q3MSQ8|DDX4_PELLE	-0.702655	-0.721696	Not Interesting
10013	NA	NA	0.877774	0.56018	Not Interesting
100139	g27211	sp|Q14161|GIT2_HUMAN	-0.511216	-0.521273	Not Interesting
100142	g27211	sp|Q14161|GIT2_HUMAN	-0.625907	-0.532174	Not Interesting
100155	g27218	sp|P98154|IDD_MOUSE	-0.895914	-0.652765	Not Interesting
100175	g27219	sp|P53814|SMTN_HUMAN	-1.07905	-1.00937	Not Interesting
100176	g27219	sp|P53814|SMTN_HUMAN	-1.28898	-1.09107	Not Interesting
100179	g27219	sp|P53814|SMTN_HUMAN	-0.858958	-0.560282	Not Interesting
100180	g27219	sp|P53814|SMTN_HUMAN	-1.51945	-1.19644	Not Interesting
100216	g27225	NA	-0.773645	-0.677549	Not Interesting
100220	g16419	NA	0.793577	1.40363	Not Interesting
100228	g16497	NA	-0.888875	-0.786865	Not Interesting
10025	g2837	sp|P10090|WHITE_DROME	0.719129	0.3646	Not Interesting
100260	g16503	sp|P56696|KCNQ4_HUMAN	-0.868918	-0.79695	Not Interesting
100295	g16528	NA	-0.489276	-1.33977	Not Interesting
100297	g16528	NA	0.86544	0.588764	Not Interesting
100311	g16533	sp|Q8VHV8|SELS_RAT	0.432847	0.287382	Not Interesting
100319	g16538	sp|Q28GD9|RNH2B_XENTR	-1.32951	-1.31964	Not Interesting
100377	g16546	sp|E7F5E1|CE162_DANRE	1.0226	1.87186	Not Interesting
100390	g16547	sp|Q6PBF0|RL8_XENTR	-0.382391	-0.489198	Not Interesting
100406	g16553	sp|O00410|IPO5_HUMAN	-0.469858	-0.561994	Not Interesting
100421	g16557	sp|Q09604|VAB15_CAEEL	-1.31003	-1.0482	Not Interesting
100487	g5289	sp|Q7ZUW2|HYOU1_DANRE	0.682307	0.411073	Not Interesting
100500	g20013	NA	-0.924079	-1.07334	Not Interesting
10054	g2848	sp|Q96DM1|PGBD4_HUMAN	0.500024	0.388359	Not Interesting
100540	g32050	NA	-1.8059	-1.6787	Not Interesting
100575	g17136	sp|P56696|KCNQ4_HUMAN	-0.606375	-0.582305	Not Interesting
100589	g17139	sp|Q90610|NEO1_CHICK	-1.1931	-0.829433	Not Interesting
100605	g17144	sp|Q9R0Y1|ASIC5_MOUSE	0.610917	0.460364	Not Interesting
100606	g17144	sp|Q9R0Y1|ASIC5_MOUSE	0.787874	0.886459	Not Interesting
100630	g17150	sp|Q02006|Y4233_RHOPA	0.788605	0.843622	Not Interesting
100642	g17151	NA	0.828263	0.704224	Not Interesting
100643	g17151	NA	2.28023	1.75081	Not Interesting
1007	g13514	sp|Q9BX10|GTPB2_HUMAN	1.68813	1.506	Not Interesting
10071	g2855	NA	-0.655288	-1.59055	Not Interesting
100760	g6515	sp|Q10473|GALT1_RAT	0.300123	0.618772	Not Interesting
100792	g6525	NA	-0.668695	-0.444248	Not Interesting
100794	g6526	sp|P13116|SRC2_XENLA	-0.701647	-0.591114	Not Interesting
100798	g6526	sp|P13116|SRC2_XENLA	-0.811503	-0.576311	Not Interesting
100804	g6527	sp|Q8TCB7|METL6_HUMAN	-0.43995	-0.254697	Not Interesting
10082	g17518	NA	-0.72409	-0.894631	Not Interesting
10083	g17518	NA	-1.69249	-2.24377	Not Interesting
100835	g6538	NA	-0.677326	-0.150396	Not Interesting
100836	g6538	NA	-1.3583	-0.834445	Not Interesting
100864	g6547	NA	0.846696	0.455825	Not Interesting
100869	g6548	sp|Q6ZQ89|MARH6_MOUSE	-0.400322	-0.561956	Not Interesting
100879	g6550	NA	0.962919	0.744201	Not Interesting
100883	g6553	NA	-0.652816	-0.72985	Not Interesting
100888	g6554	NA	-0.678471	-0.453033	Not Interesting
100889	g6554	NA	-1.01754	-1.20191	Not Interesting
10091	NA	NA	-0.609649	-0.598301	Not Interesting
100993	g1654	NA	-0.603485	-0.167291	Not Interesting
100995	g1654	NA	-0.486597	-0.542413	Not Interesting
1010	g13514	sp|Q9BX10|GTPB2_HUMAN	2.94325	2.24273	Not Interesting
101001	g1655	sp|Q9D531|NXNL2_MOUSE	-1.03747	-0.993888	Not Interesting
101008	g1659	NA	-1.05203	-1.15609	Not Interesting
101080	g12824	sp|Q80TC5|POGK_MOUSE	-0.761231	-0.773546	Not Interesting
101082	g12829	NA	-0.689954	-0.833014	Not Interesting
101086	g12831	NA	0.794302	0.669657	Not Interesting
101119	g19956	sp|Q8IY21|DDX60_HUMAN	-0.524058	-0.489276	Not Interesting
101138	g9138	sp|Q9QXA6|BAT1_MOUSE	-0.673486	-0.475592	Not Interesting
101149	g9139	sp|Q8BGF3|WDR92_MOUSE	0.296089	0.418342	Not Interesting
101187	g31949	NA	-0.830809	-0.846557	Not Interesting
101189	g31949	NA	-0.557828	-1.33028	Not Interesting
101199	g31950	NA	-1.10372	-0.874104	Not Interesting
101218	g31953	NA	-1.23744	-1.84418	Not Interesting
101253	g31959	NA	2.12337	1.26379	Not Interesting
10127	g1096	sp|Q63429|UBC_RAT	0.634358	0.540775	Not Interesting
101300	g9491	NA	-0.746346	-0.479654	Not Interesting
101333	g9512	NA	-0.537456	-0.717427	Not Interesting
101355	g29507	sp|Q0IJ05|OSBL9_XENTR	0.462014	0.252058	Not Interesting
101359	g29507	sp|Q0IJ05|OSBL9_XENTR	0.645432	0.592268	Not Interesting
101374	g29508	NA	0.639913	0.645652	Not Interesting
10148	g1102	NA	0.620422	0.633174	Not Interesting
101498	g33690	sp|P21328|RTJK_DROME	-2.26993	-1.54232	Not Interesting
101499	g33690	sp|P21328|RTJK_DROME	-0.933931	-0.996837	Not Interesting
101503	g21432	sp|O42387|RS24_TAKRU	-0.444365	-0.608225	Not Interesting
101578	g13015	NA	-0.741354	-0.37708	Not Interesting
101579	g13016	sp|Q5ZKD9|KLH20_CHICK	-0.889638	-0.823915	Not Interesting
101580	g13016	sp|Q5ZKD9|KLH20_CHICK	0.549413	0.626234	Not Interesting
101596	g13017	sp|Q13591|SEM5A_HUMAN	-0.475844	-0.892587	Not Interesting
101597	g13017	sp|Q13591|SEM5A_HUMAN	-0.788663	-0.758716	Not Interesting
101601	g13019	sp|P16273|PRPX_HORVU	0.852989	0.470111	Not Interesting
101615	g13026	NA	1.14877	0.724606	Not Interesting
101638	g9116	NA	3.52474	1.99865	Not Interesting
101639	g9117	NA	0.995354	0.617083	Not Interesting
101641	g9118	NA	0.609098	0.393186	Not Interesting
101643	g9118	NA	1.66628	0.907311	Not Interesting
101735	g22612	sp|Q91827|AR1_XENLA	0.51616	0.786036	Not Interesting
101738	g22612	sp|Q91827|AR1_XENLA	-0.585119	-0.331015	Not Interesting
101753	g22615	sp|Q8HYJ7|FUT5_GORGO	1.17735	0.992144	Not Interesting
101754	g22615	sp|Q8HYJ7|FUT5_GORGO	1.16281	0.83616	Not Interesting
101756	g22615	sp|Q8HYJ7|FUT5_GORGO	1.28148	0.492432	Not Interesting
101760	g22616	sp|Q5DQR4|STB5L_MOUSE	1.05996	0.900769	Not Interesting
101809	g31753	NA	-0.541586	-0.442696	Not Interesting
101866	g31795	sp|Q8ETH0|HMP_OCEIH	-1.15182	-0.77372	Not Interesting
101875	g31795	sp|Q8ETH0|HMP_OCEIH	-0.818363	-0.694561	Not Interesting
101876	g31795	sp|Q8ETH0|HMP_OCEIH	-1.94646	-1.56548	Not Interesting
101893	g31799	NA	-0.747992	-0.944291	Not Interesting
101943	g18766	NA	0.516389	0.484415	Not Interesting
101960	g18772	sp|Q626N3|TM151_CAEBR	-1.03713	-0.889392	Not Interesting
101982	g1126	NA	1.37505	1.19081	Not Interesting
101992	g1128	NA	-0.847799	-0.767324	Not Interesting
101995	g1131	NA	-1.12404	-0.906449	Not Interesting
101996	g1132	NA	-0.95289	-0.986216	Not Interesting
10201	g29711	sp|Q9BTV6|DPH7_HUMAN	1.29297	0.687927	Not Interesting
102032	g1140	sp|G3V9H8|RET_RAT	0.565138	0.735411	Not Interesting
102043	g1143	sp|Q60997|DMBT1_MOUSE	-0.716222	-0.665159	Not Interesting
10205	g29711	sp|Q9BTV6|DPH7_HUMAN	1.28407	1.05239	Not Interesting
102051	g1145	sp|P35546|RET_MOUSE	-0.60919	-0.844559	Not Interesting
102057	g1146	sp|Q498D6|FGFR4_RAT	0.342576	0.510197	Not Interesting
102080	g1155	sp|Q86HQ2|ABCG8_DICDI	-0.622367	-0.61306	Not Interesting
102083	g1155	sp|Q86HQ2|ABCG8_DICDI	-0.983637	-0.868166	Not Interesting
102153	g1203	NA	0.98733	0.779311	Not Interesting
102156	g1205	NA	-1.40443	-0.821837	Not Interesting
102277	g21201	sp|Q63430|CSDC2_RAT	1.03965	1.16823	Not Interesting
102309	g21209	NA	0.401379	0.247252	Not Interesting
102326	g21212	NA	0.6932	0.310313	Not Interesting
102337	g21219	sp|Q90623|MYPT1_CHICK	0.774384	0.333766	Not Interesting
102340	g21220	NA	0.731725	0.675381	Not Interesting
102341	g21220	NA	0.71323	0.583347	Not Interesting
1024	g13519	sp|Q7M456|RNOY_CRAGI	-1.13867	-0.839569	Not Interesting
102406	g33476	NA	-1.42345	-1.33943	Not Interesting
102413	g33476	NA	1.41918	0.572927	Not Interesting
102422	g33477	sp|Q24799|MYPH_ECHGR	0.514552	0.417095	Not Interesting
102484	g23186	NA	-1.07846	-1.08004	Not Interesting
102513	g23188	sp|P31646|S6A13_RAT	-0.596735	-0.460909	Not Interesting
102553	g23196	NA	-0.641515	-0.682779	Not Interesting
102597	g14832	sp|B0UYT5|MFD6B_DANRE	-0.499166	-0.34673	Not Interesting
102600	g14832	sp|B0UYT5|MFD6B_DANRE	-0.598932	-0.486326	Not Interesting
102612	g14838	sp|Q8CBH5|MFSD6_MOUSE	-0.635595	-0.756187	Not Interesting
102622	g14839	sp|B0UYT5|MFD6B_DANRE	-0.468409	-0.302815	Not Interesting
102637	g9166	sp|Q8UWA5|CAH2_TRIHK	-0.830329	-0.858647	Not Interesting
102652	g9167	sp|Q8UWA5|CAH2_TRIHK	-0.386106	-0.6064	Not Interesting
102662	g9168	sp|P35072|TCB1_CAEBR	0.692679	0.656578	Not Interesting
102665	g9168	sp|P35072|TCB1_CAEBR	0.839439	0.550342	Not Interesting
102667	g9169	sp|Q8UWA5|CAH2_TRIHK	-0.974816	-0.92449	Not Interesting
102669	g9169	sp|Q8UWA5|CAH2_TRIHK	0.774257	0.529354	Not Interesting
102776	g9207	NA	0.714479	0.603825	Not Interesting
102781	g9208	NA	-0.808979	-0.259541	Not Interesting
102843	g21939	NA	-0.598083	-0.65358	Not Interesting
102877	g9893	sp|Q2Q426|AGRE2_MACMU	0.822854	0.662211	Not Interesting
10288	g29761	sp|P25927|BIGA_SALTY	-0.921526	-0.799417	Not Interesting
10289	g29761	sp|P25927|BIGA_SALTY	-0.595376	-0.987746	Not Interesting
102891	g6896	NA	0.441421	0.54989	Not Interesting
102994	g7711	NA	0.825567	0.892909	Not Interesting
1030	g13520	NA	0.712253	0.591363	Not Interesting
103001	g7717	sp|P27080|ADT_CHLRE	-0.332391	-0.607973	Not Interesting
103052	g7731	NA	0.790724	0.702336	Not Interesting
103061	g7731	NA	-0.920307	-0.626871	Not Interesting
103070	g7731	NA	-0.842693	-0.470653	Not Interesting
1031	g13520	NA	1.10313	0.677951	Not Interesting
103104	g413	NA	-0.63092	-0.547218	Not Interesting
103140	g424	sp|Q9EST9|FGF20_RAT	-0.238104	-0.721429	Not Interesting
103148	g431	NA	0.420619	0.316387	Not Interesting
10321	g29767	sp|P29288|PPA5_RAT	0.853223	0.986509	Not Interesting
103211	g445	NA	-1.09074	-0.645422	Not Interesting
103212	g445	NA	-1.02942	-0.637377	Not Interesting
103214	g445	NA	-0.914621	-0.482175	Not Interesting
103217	g445	NA	-0.551499	-0.209744	Not Interesting
103225	g447	sp|Q8IZF6|AGRG4_HUMAN	0.716606	0.190069	Not Interesting
103233	g447	sp|Q8IZF6|AGRG4_HUMAN	-0.744938	-0.692926	Not Interesting
103236	g448	NA	0.837733	0.781473	Not Interesting
103240	g449	sp|Q9JHJ0|TMOD3_MOUSE	-0.666473	-0.448487	Not Interesting
103243	g449	sp|Q9JHJ0|TMOD3_MOUSE	-1.38407	-1.29252	Not Interesting
103244	g449	sp|Q9JHJ0|TMOD3_MOUSE	-0.814779	-0.565195	Not Interesting
103251	g450	NA	-0.821685	-1.08956	Not Interesting
103274	g453	sp|P21213|HUTH_RAT	0.87229	0.624761	Not Interesting
103281	g455	sp|P21213|HUTH_RAT	0.651078	0.625402	Not Interesting
103291	g15133	sp|Q6MG82|PRRT1_RAT	2.40617	2.08662	Not Interesting
103292	g15133	sp|Q6MG82|PRRT1_RAT	2.06933	1.33145	Not Interesting
103294	g15133	sp|Q6MG82|PRRT1_RAT	0.59267	0.526823	Not Interesting
103295	g15133	sp|Q6MG82|PRRT1_RAT	0.552211	0.526257	Not Interesting
103323	g15141	sp|A4IG66|TM201_DANRE	-0.458997	-0.349504	Not Interesting
103328	g15144	sp|O00409|FOXN3_HUMAN	0.278668	0.451931	Not Interesting
103329	g15145	NA	0.420354	0.287535	Not Interesting
103330	g15145	NA	-0.556748	-0.442638	Not Interesting
103348	g15148	sp|Q5R501|OST48_PONAB	0.857415	0.788404	Not Interesting
103349	g15148	sp|Q5R501|OST48_PONAB	0.470067	0.434181	Not Interesting
103385	g15160	sp|Q6P3X8|PGBD2_HUMAN	0.564173	0.682216	Not Interesting
103400	g15167	NA	0.564422	0.362625	Not Interesting
103414	g15171	sp|P59742|NGB1_ONCMY	-0.502424	-0.72109	Not Interesting
103467	g11408	sp|Q9Z254|GIPC1_RAT	-0.518132	-0.362311	Not Interesting
103470	g11408	sp|Q9Z254|GIPC1_RAT	-1.22475	-0.922477	Not Interesting
103501	g10856	NA	1.12924	0.464231	Not Interesting
103509	g10863	NA	-0.960434	-0.84996	Not Interesting
103532	g9701	NA	0.657655	0.389101	Not Interesting
103563	g9713	sp|P10039|TENA_CHICK	1.21228	0.656402	Not Interesting
103590	g9721	NA	-0.993782	-0.972426	Not Interesting
103591	g9721	NA	-1.49355	-1.60147	Not Interesting
103592	g9722	NA	-0.967499	-0.828596	Not Interesting
10363	g26728	NA	1.72341	0.957414	Not Interesting
103702	g18506	NA	1.09332	0.445545	Not Interesting
103741	g21233	sp|Q9NPA2|MMP25_HUMAN	0.684501	0.680174	Not Interesting
103755	g21235	sp|Q94BZ1|ZIFL1_ARATH	0.801628	0.453769	Not Interesting
103785	g21238	sp|Q9P2K1|C2D2A_HUMAN	-0.589777	-0.520029	Not Interesting
103792	g21238	sp|Q9P2K1|C2D2A_HUMAN	-1.3096	-1.16391	Not Interesting
103875	g28522	NA	-0.778224	-0.779717	Not Interesting
103892	g28523	NA	-0.923096	-0.831323	Not Interesting
103916	g5911	sp|P47810|WEE1_MOUSE	-1.90753	-1.65271	Not Interesting
103982	g5926	sp|P10076|ZFP26_MOUSE	-1.28333	-1.07481	Not Interesting
103983	g5926	sp|P10076|ZFP26_MOUSE	-1.72502	-1.54188	Not Interesting
103997	g5932	sp|P49137|MAPK2_HUMAN	1.32621	0.768602	Not Interesting
103998	g5932	sp|P49137|MAPK2_HUMAN	1.15242	0.5492	Not Interesting
104002	g5933	sp|P17276|PH4H_DROME	0.912888	0.867947	Not Interesting
104004	g5933	sp|P17276|PH4H_DROME	1.29967	1.06578	Not Interesting
104007	g5933	sp|P17276|PH4H_DROME	2.0884	2.01799	Not Interesting
10403	g9842	NA	-0.676658	-0.530772	Not Interesting
104084	g15379	NA	1.10026	1.87244	Not Interesting
104126	g15389	sp|Q682T9|CALM5_ARATH	-1.12902	-0.895064	Not Interesting
104129	g15390	sp|Q9Y619|ORNT1_HUMAN	-1.02012	-0.85735	Not Interesting
104130	g15390	sp|Q9Y619|ORNT1_HUMAN	-0.769126	-0.443999	Not Interesting
104222	g29660	sp|Q9D0B5|TSTD3_MOUSE	0.599246	0.511032	Not Interesting
104239	g29664	NA	0.719856	0.713852	Not Interesting
10429	g9854	sp|Q8CFK2|TF3B_MOUSE	0.78538	0.779714	Not Interesting
10430	g9857	sp|P39795|TREC_BACSU	1.54053	1.3646	Not Interesting
104310	g19474	NA	-0.652535	-0.633406	Not Interesting
104329	g19480	sp|Q9VAS7|INX3_DROME	-0.587949	-0.797687	Not Interesting
104330	g19480	sp|Q9VAS7|INX3_DROME	-0.748096	-0.734428	Not Interesting
104332	g19481	NA	-0.728507	-0.384599	Not Interesting
104396	g19502	sp|Q5RID7|SNX17_DANRE	-0.748665	-0.965489	Not Interesting
10440	g9860	NA	-0.625876	-0.410795	Not Interesting
104475	g24010	sp|Q4KMJ1|CHAC2_DANRE	-0.548203	-0.647483	Not Interesting
104476	g24010	sp|Q4KMJ1|CHAC2_DANRE	-0.643698	-0.690501	Not Interesting
1045	g13529	NA	1.06261	1.69904	Not Interesting
10452	g9871	sp|Q6P2K6|P4R3A_MOUSE	0.817652	0.663419	Not Interesting
104529	g24024	sp|Q91X58|ZFN2B_MOUSE	0.399143	0.52347	Not Interesting
104549	g24035	NA	3.64126	3.17585	Not Interesting
104563	g24037	NA	3.08054	2.15219	Not Interesting
104565	g24037	NA	2.38703	1.75311	Not Interesting
104567	g24037	NA	1.22257	0.877294	Not Interesting
104568	g24037	NA	0.792637	0.381659	Not Interesting
104571	g24037	NA	-0.776415	-0.470101	Not Interesting
10459	g9873	sp|Q5SP90|PP4R3_DANRE	0.72715	0.377053	Not Interesting
104590	g24043	NA	-0.692865	-0.430816	Not Interesting
1046	g13529	NA	0.502365	0.644555	Not Interesting
104650	g224	NA	-0.986661	-0.711605	Not Interesting
104651	g224	NA	-0.820194	-0.711178	Not Interesting
104653	g224	NA	-0.562902	-0.669815	Not Interesting
104655	g224	NA	-0.555484	-0.245345	Not Interesting
10466	g9879	sp|Q95NT6|MTH2_DROYA	-1.12713	-0.739415	Not Interesting
104696	g24534	sp|Q1PSW8|LIN41_MOUSE	-0.667216	-0.997199	Not Interesting
104701	g24534	sp|Q1PSW8|LIN41_MOUSE	0.684979	0.51533	Not Interesting
104718	g24542	sp|Q95KH6|RGF1C_MACFA	-1.4049	-1.38332	Not Interesting
104719	g24542	sp|Q95KH6|RGF1C_MACFA	-0.41236	-0.393046	Not Interesting
104725	g24543	NA	0.785995	0.121325	Not Interesting
104770	g9520	sp|P13797|PLST_HUMAN	0.827922	2.20467	Not Interesting
104773	g9521	sp|Q4V9P6|ADAL_DANRE	0.969315	1.05789	Not Interesting
104813	g9540	sp|P68252|1433G_BOVIN	-0.804772	-0.858102	Not Interesting
104825	g9542	sp|Q6GL75|DCC1_XENTR	-0.752678	-0.639558	Not Interesting
104826	g9542	sp|Q6GL75|DCC1_XENTR	-0.684706	-0.573621	Not Interesting
104828	g9543	sp|O55164|MPDZ_RAT	-1.14716	-1.11365	Not Interesting
104846	g9551	sp|P38978|KS1_HYDVU	-0.547817	-0.454043	Not Interesting
10488	g9882	NA	-0.932081	-0.675981	Not Interesting
104880	g2558	NA	1.03419	0.810474	Not Interesting
104887	g27076	sp|Q8N5D0|WDTC1_HUMAN	-0.618113	-0.504031	Not Interesting
104923	g27080	sp|Q8BGK5|S35F1_MOUSE	-1.21341	-1.17149	Not Interesting
104924	g27080	sp|Q8BGK5|S35F1_MOUSE	-0.830307	-0.762086	Not Interesting
104990	g27095	NA	-0.881828	-1.14675	Not Interesting
105038	g27119	NA	-0.638278	-0.559358	Not Interesting
105039	g27119	NA	-1.39989	-2.05074	Not Interesting
105089	g32693	sp|P14408|FUMH_RAT	1.05804	0.273286	Not Interesting
105104	g32700	sp|Q9NQR9|G6PC2_HUMAN	-0.487173	-0.594156	Not Interesting
105130	g32707	sp|Q9NQC3|RTN4_HUMAN	-1.12851	-1.11392	Not Interesting
105161	g32716	NA	0.723993	0.440015	Not Interesting
105189	g18777	NA	0.628967	0.904438	Not Interesting
105198	g18779	sp|Q61041|NPY4R_MOUSE	-1.16157	-1.32943	Not Interesting
105292	g11925	sp|Q9BUZ4|TRAF4_HUMAN	0.881285	0.514008	Not Interesting
105296	g11925	sp|Q9BUZ4|TRAF4_HUMAN	-0.813162	-0.970523	Not Interesting
105298	g11925	sp|Q9BUZ4|TRAF4_HUMAN	-0.968962	-0.509957	Not Interesting
105338	g11950	sp|Q8CFH6|SIK2_MOUSE	1.09343	0.987614	Not Interesting
105339	g11950	sp|Q8CFH6|SIK2_MOUSE	0.615857	0.769783	Not Interesting
105341	g11950	sp|Q8CFH6|SIK2_MOUSE	2.84699	2.51511	Not Interesting
105356	g11952	sp|Q9V3B4|FADD_DROME	-0.651558	-0.710566	Not Interesting
105365	g11956	sp|Q5THJ4|VP13D_HUMAN	0.375068	0.497795	Not Interesting
105383	g11961	NA	0.693557	0.532107	Not Interesting
105387	g11965	sp|O55005|ROBO1_RAT	0.904313	0.788694	Not Interesting
105443	g11989	NA	1.29328	0.683279	Not Interesting
105456	g11994	NA	3.73559	2.61495	Not Interesting
105467	g11996	sp|A5PN43|TM175_DANRE	2.47991	1.47297	Not Interesting
105479	g12000	sp|Q9CXY1|TM175_MOUSE	-1.18628	-0.784686	Not Interesting
105512	g12014	NA	-1.27115	-1.13838	Not Interesting
105519	g12018	NA	0.815126	0.675241	Not Interesting
105580	g23731	NA	-1.54568	-1.3464	Not Interesting
105604	g23735	sp|Q08DK7|MCATL_BOVIN	-1.0252	-0.465324	Not Interesting
105611	g23740	NA	-0.806232	-0.684167	Not Interesting
105617	g23742	sp|G3V9H8|RET_RAT	-0.737394	-0.970895	Not Interesting
105665	g23752	NA	-1.61933	-1.14803	Not Interesting
105737	g28082	sp|Q8N584|TT39C_HUMAN	0.673965	0.784628	Not Interesting
105749	g28084	sp|Q6DN12|MCTP2_HUMAN	-0.829465	-0.923073	Not Interesting
105758	g9	NA	-0.666543	-0.570118	Not Interesting
105782	g9	NA	-0.554647	-0.607557	Not Interesting
105787	g10	NA	-0.453858	-0.444382	Not Interesting
10579	g7366	NA	-0.7248	-0.825147	Not Interesting
105940	g7262	sp|P35224|CTNB_URECA	1.6587	1.09321	Not Interesting
105941	g7262	sp|P35224|CTNB_URECA	1.6454	1.22198	Not Interesting
105949	g7263	sp|O08760|OGG1_MOUSE	-0.976912	-0.793629	Not Interesting
106044	g21597	sp|Q92047|PIMT_DANRE	-0.74085	-0.54645	Not Interesting
106076	g21605	sp|Q6PF21|SYMC_XENLA	-0.490172	-0.871527	Not Interesting
106108	g21613	sp|Q4QQV8|CHMP5_RAT	2.13203	1.27915	Not Interesting
106109	g21613	sp|Q4QQV8|CHMP5_RAT	2.09445	1.22857	Not Interesting
106125	g21527	sp|Q91736|EPB1B_XENLA	-1.16969	-1.06243	Not Interesting
10619	g7344	NA	0.868418	0.543516	Not Interesting
106209	g2704	NA	-0.416056	-0.641033	Not Interesting
10623	g7349	NA	0.807841	1.00115	Not Interesting
106237	g2707	NA	-0.471014	-0.973508	Not Interesting
106258	g2716	NA	0.733886	0.762768	Not Interesting
106282	g2718	sp|Q9QZ67|PPM1D_MOUSE	-0.579675	-0.482253	Not Interesting
106370	g24070	sp|P70567|TMOD1_RAT	-0.945958	-0.7563	Not Interesting
106391	g960	NA	-0.854361	-0.575449	Not Interesting
10645	g7354	NA	0.50995	0.456464	Not Interesting
106452	g17940	sp|Q24799|MYPH_ECHGR	-0.892644	-0.829534	Not Interesting
10646	g7354	NA	0.378972	0.335855	Not Interesting
106539	g13406	sp|Q75N73|S39AE_MOUSE	-0.781348	-0.668978	Not Interesting
106542	g13406	sp|Q75N73|S39AE_MOUSE	-1.12772	-0.736776	Not Interesting
10708	g7379	sp|Q7TMF2|ERI1_MOUSE	0.263083	0.398909	Not Interesting
10755	g20052	sp|Q6PAX2|ATD3B_XENLA	-1.15186	-1.15853	Not Interesting
10812	g17387	NA	-0.485756	-0.781448	Not Interesting
10827	g17392	sp|Q4R7D3|SAXO1_MACFA	-0.793157	-1.04158	Not Interesting
10840	g17396	NA	-0.987606	-1.23349	Not Interesting
10887	g12322	sp|P40240|CD9_MOUSE	0.828596	0.906987	Not Interesting
10888	g12322	sp|P40240|CD9_MOUSE	0.713009	0.61783	Not Interesting
10893	g12322	sp|P40240|CD9_MOUSE	0.550169	0.579213	Not Interesting
10903	g12323	NA	1.24548	0.912804	Not Interesting
10952	g12342	sp|Q6TLI9|DRD2_MUSPF	1.58302	0.971333	Not Interesting
10953	g12342	sp|Q6TLI9|DRD2_MUSPF	2.00131	1.54643	Not Interesting
10954	g12342	sp|Q6TLI9|DRD2_MUSPF	1.01427	0.846229	Not Interesting
10976	g12355	NA	-0.99411	-0.839535	Not Interesting
10977	g12355	NA	-1.13071	-0.877548	Not Interesting
11023	g12366	NA	-0.77099	-0.704814	Not Interesting
11045	g12368	sp|P16389|KCNA2_HUMAN	-0.838246	-0.617053	Not Interesting
11099	g6256	NA	0.807822	0.757139	Not Interesting
11130	g21478	NA	-0.782444	-0.235704	Not Interesting
11138	g21478	NA	1.15981	1.41102	Not Interesting
11139	g21478	NA	0.378866	0.462148	Not Interesting
11154	g21482	sp|Q7JQ07|MOS1T_DROMA	-0.467091	-0.553712	Not Interesting
11179	g21488	sp|O57422|OPN4B_XENLA	-1.25583	-0.673094	Not Interesting
11197	g21492	sp|P08116|PVA_PLAFA	-1.64836	-1.39246	Not Interesting
11225	g21508	NA	-0.654658	-0.513012	Not Interesting
11231	g21508	NA	2.71676	2.54012	Not Interesting
11241	NA	NA	-0.657366	-0.657259	Not Interesting
11246	g19700	NA	-0.499205	-0.713866	Not Interesting
11339	g15456	sp|B2LU20|SFXN1_SHEEP	0.779454	0.589802	Not Interesting
11363	g15465	sp|Q9BST9|RTKN_HUMAN	0.740638	0.431809	Not Interesting
11459	g19999	NA	-1.26912	-1.21605	Not Interesting
11474	g20005	sp|Q8WXI2|CNKR2_HUMAN	-0.75744	-0.662106	Not Interesting
11492	g5658	sp|Q8C6K9|CO6A6_MOUSE	-1.10917	-0.854333	Not Interesting
11502	g5660	sp|A8TX70|CO6A5_HUMAN	-0.44606	-0.46441	Not Interesting
11518	g5851	sp|Q8C172|CERS6_MOUSE	-0.668446	-0.773644	Not Interesting
11542	g33323	NA	-0.689936	-0.47771	Not Interesting
11616	g23029	sp|Q5F2F2|ABH15_MOUSE	1.15971	1.07436	Not Interesting
11617	g23029	sp|Q5F2F2|ABH15_MOUSE	0.308968	0.3521	Not Interesting
11644	g22580	NA	-0.957912	-0.787418	Not Interesting
11659	g22585	sp|Q91Z46|DUS7_MOUSE	0.411794	0.386211	Not Interesting
11660	g22585	sp|Q91Z46|DUS7_MOUSE	1.54608	1.25596	Not Interesting
117	g18885	NA	-0.681983	-0.660687	Not Interesting
11713	g29231	sp|P26638|SYSC_MOUSE	0.964306	0.536557	Not Interesting
11720	g29232	NA	-0.504927	-0.462969	Not Interesting
11724	g29234	sp|Q28E95|SH3R1_XENTR	-0.816063	-0.557079	Not Interesting
11743	g29242	NA	-1.1027	-1.49299	Not Interesting
11766	g29256	sp|B9DFR3|PAE9_ARATH	-0.64723	-0.563804	Not Interesting
11801	g29264	sp|Q14185|DOCK1_HUMAN	-0.715009	-0.453317	Not Interesting
11806	g29265	sp|Q9DGG6|ADCY9_CHICK	-0.581243	-0.951074	Not Interesting
11807	g29265	sp|Q9DGG6|ADCY9_CHICK	-0.411068	-0.372514	Not Interesting
11811	g29266	sp|P51830|ADCY9_MOUSE	1.64382	1.4794	Not Interesting
11813	g29266	sp|P51830|ADCY9_MOUSE	-0.682594	-0.587581	Not Interesting
11815	g29266	sp|P51830|ADCY9_MOUSE	-0.8507	-0.838328	Not Interesting
11816	g29267	NA	1.34027	1.30861	Not Interesting
11834	g29272	sp|P16395|ACM1_DROME	-0.84479	-0.703292	Not Interesting
11853	g29284	sp|Q9NBX4|RTXE_DROME	-0.921835	-0.862267	Not Interesting
11863	g29287	NA	-0.780062	-0.478589	Not Interesting
11869	g29288	NA	-0.835217	-0.709373	Not Interesting
11906	g29298	sp|Q9VZW5|FMAR_DROME	-1.26076	-1.27946	Not Interesting
11913	g29299	sp|Q9D0F3|LMAN1_MOUSE	0.904395	0.748683	Not Interesting
11924	g29300	NA	0.732464	0.386062	Not Interesting
11927	g29300	NA	0.604695	0.616362	Not Interesting
11945	g29308	sp|Q4L235|ACSF4_HUMAN	0.960115	0.41087	Not Interesting
11947	g29308	sp|Q4L235|ACSF4_HUMAN	1.3391	0.723683	Not Interesting
11959	g29309	sp|Q8TB61|S35B2_HUMAN	1.26776	0.953612	Not Interesting
11967	g29314	NA	0.821768	0.916364	Not Interesting
11980	g29317	sp|Q6DCX5|PCFT_XENLA	0.793804	0.498136	Not Interesting
11995	g29319	sp|O15118|NPC1_HUMAN	0.414743	0.309147	Not Interesting
120	g18886	NA	1.01276	1.00114	Not Interesting
12001	g29319	sp|O15118|NPC1_HUMAN	0.653433	0.38458	Not Interesting
12066	g22521	NA	-0.733624	-0.748714	Not Interesting
12087	g1351	NA	-0.930748	-0.953038	Not Interesting
12100	g1355	NA	0.87092	0.941616	Not Interesting
12117	g1359	NA	1.0802	0.927955	Not Interesting
12123	g1360	NA	0.889639	0.532467	Not Interesting
12178	g30694	NA	-0.837121	-0.571746	Not Interesting
12190	g30699	sp|P16425|Y2R2_DROME	0.869923	0.754447	Not Interesting
12192	g30700	sp|Q9BY84|DUS16_HUMAN	1.90786	1.68687	Not Interesting
12198	g30702	sp|Q4R3M6|NDUS5_MACFA	-0.994971	-0.705345	Not Interesting
12252	g30710	sp|Q8K370|ACD10_MOUSE	-1.16702	-1.07553	Not Interesting
12377	g13307	sp|P41252|SYIC_HUMAN	0.406373	0.618302	Not Interesting
12378	g13307	sp|P41252|SYIC_HUMAN	0.349365	0.222513	Not Interesting
12380	g13307	sp|P41252|SYIC_HUMAN	2.0608	1.59474	Not Interesting
12382	g13307	sp|P41252|SYIC_HUMAN	2.25138	1.81344	Not Interesting
12387	g13309	sp|P41252|SYIC_HUMAN	1.91373	1.3457	Not Interesting
1243	g23832	sp|Q9LS44|PCR4_ARATH	-0.535903	-0.739194	Not Interesting
12531	g7437	sp|Q5GIS3|GBB_PINFU	-0.419731	-0.513638	Not Interesting
12538	g32929	NA	0.645824	0.65267	Not Interesting
12543	g32930	sp|Q2U7A3|ACT_ASPOR	-1.08827	-0.74267	Not Interesting
12544	g32930	sp|Q2U7A3|ACT_ASPOR	-0.877996	-0.73085	Not Interesting
12547	g32930	sp|Q2U7A3|ACT_ASPOR	-0.881358	-0.534481	Not Interesting
12548	g32930	sp|Q2U7A3|ACT_ASPOR	-0.625525	-0.380222	Not Interesting
12551	g32930	sp|Q2U7A3|ACT_ASPOR	-0.859902	-1.04786	Not Interesting
12692	g8192	NA	-0.708473	-0.723652	Not Interesting
12753	g26066	sp|Q3MV19|TRF6A_XENLA	-0.268386	-0.480696	Not Interesting
1277	g23834	sp|Q640L2|SPX3_XENLA	-1.24017	-1.10984	Not Interesting
12811	g6414	sp|A6NHR9|SMHD1_HUMAN	-0.736686	-0.350386	Not Interesting
12903	g9811	sp|A2AJ76|HMCN2_MOUSE	0.751138	0.727679	Not Interesting
12925	g9814	NA	-0.647875	-0.36686	Not Interesting
12938	g9815	sp|P0C1Q2|PDE11_MOUSE	-0.698794	-0.683525	Not Interesting
12966	g9819	sp|P86179|CSL3_ONCKE	0.954918	0.429951	Not Interesting
12967	g9820	NA	2.28322	1.90299	Not Interesting
12968	g9820	NA	0.630687	0.471639	Not Interesting
13018	g9830	NA	-0.775326	-0.393998	Not Interesting
13036	g9834	sp|O34886|YTCB_BACSU	0.795335	0.753029	Not Interesting
13044	g9835	sp|Q9I8S4|AZIN2_XENLA	-0.533085	-0.335323	Not Interesting
13045	g9835	sp|Q9I8S4|AZIN2_XENLA	-0.833749	-0.746041	Not Interesting
13061	g29097	NA	-0.616273	-0.943809	Not Interesting
13070	g29098	NA	-0.408699	-0.472171	Not Interesting
13127	g27911	sp|Q95SX7|RTBS_DROME	-0.543883	-0.3221	Not Interesting
13130	g27911	sp|Q95SX7|RTBS_DROME	-0.751573	-0.639883	Not Interesting
13131	g19215	NA	-0.738274	-1.02426	Not Interesting
13136	g19216	sp|Q6GQB9|EDEM3_XENLA	1.99026	1.83437	Not Interesting
13140	g19216	sp|Q6GQB9|EDEM3_XENLA	1.62752	0.962672	Not Interesting
13157	g19218	NA	-0.897908	-0.806228	Not Interesting
13169	g19220	NA	-0.9075	-1.06728	Not Interesting
1317	g11048	sp|Q64077|NK2R_CAVPO	-0.32419	-0.800581	Not Interesting
13170	g19220	NA	-1.99932	-1.84355	Not Interesting
13177	g19221	NA	-0.603838	-0.57012	Not Interesting
13179	g19221	NA	-0.743417	-0.686452	Not Interesting
13183	g19222	NA	0.736057	0.218852	Not Interesting
13195	g19222	NA	-0.950374	-0.78646	Not Interesting
13200	g19223	NA	-0.494123	-0.537885	Not Interesting
13210	g19229	NA	-0.627325	-0.457979	Not Interesting
13216	g19230	sp|Q9EQX4|AIF1L_MOUSE	1.10748	0.630454	Not Interesting
13237	g19232	NA	0.68004	0.184247	Not Interesting
1330	g11049	sp|P35072|TCB1_CAEBR	-0.520696	-0.229521	Not Interesting
13312	g9691	sp|Q9VHR6|ATG13_DROME	1.48593	1.22281	Not Interesting
13320	g9693	sp|P18503|CAS4_EPHMU	0.815375	0.506723	Not Interesting
13340	g9694	sp|Q6I6M7|FGF1_CYNPY	-0.553903	-0.548348	Not Interesting
13356	g30675	sp|Q8BGC4|PTGR3_MOUSE	-0.799629	-0.586728	Not Interesting
1338	g11054	NA	-0.704008	-0.244563	Not Interesting
13438	g19983	NA	1.37613	0.855168	Not Interesting
13444	g19984	sp|Q02225|SKI_XENLA	-1.15763	-0.959902	Not Interesting
13445	g19984	sp|Q02225|SKI_XENLA	-0.936631	-0.885925	Not Interesting
13447	g19984	sp|Q02225|SKI_XENLA	-1.23037	-1.39801	Not Interesting
13448	g19984	sp|Q02225|SKI_XENLA	-1.30012	-0.903556	Not Interesting
1345	g11056	NA	-0.329766	-0.586755	Not Interesting
1348	g11056	NA	1.63861	0.916306	Not Interesting
13535	g22633	sp|P34275|IVD_CAEEL	-0.852072	-1.21353	Not Interesting
13542	g22636	NA	1.50081	0.868865	Not Interesting
13543	g22636	NA	1.39535	0.849829	Not Interesting
13544	g22636	NA	1.13555	0.460973	Not Interesting
13545	g22636	NA	-0.708929	-0.286429	Not Interesting
13546	g22636	NA	0.715062	0.472606	Not Interesting
13547	g22636	NA	0.855037	0.790945	Not Interesting
13552	g22637	NA	-0.696411	-0.55108	Not Interesting
13556	g22638	NA	-0.56782	-0.777172	Not Interesting
1356	g11058	sp|C4R7Z3|C9MT_KOMPG	-0.967659	-0.553073	Not Interesting
13561	g22639	sp|Q58A42|DD3_DICDI	-1.41412	-1.32384	Not Interesting
13590	g22646	sp|P0CH95|PHF8_DANRE	-0.573195	-1.28082	Not Interesting
13594	g22646	sp|P0CH95|PHF8_DANRE	1.401	1.36872	Not Interesting
13600	g22647	NA	0.497259	0.374497	Not Interesting
13610	g22649	sp|P28867|KPCD_MOUSE	0.553572	0.446866	Not Interesting
13623	g22652	NA	1.31947	1.11883	Not Interesting
13630	g22655	sp|Q63690|BAX_RAT	1.05177	0.637806	Not Interesting
13639	g22657	sp|Q3ZCU0|YK006_HUMAN	-0.584513	-0.597033	Not Interesting
13647	g22659	NA	-0.970549	-1.49047	Not Interesting
1365	g11059	sp|Q9BQI7|PSD2_HUMAN	-0.843064	-0.791343	Not Interesting
13669	g22663	NA	-0.637603	-0.521023	Not Interesting
13695	g22671	sp|Q12792|TWF1_HUMAN	-1.36363	-0.813891	Not Interesting
137	g18894	sp|Q2KIK0|SGT1_BOVIN	-0.689077	-0.579594	Not Interesting
1371	g11061	NA	-0.835437	-0.576758	Not Interesting
13713	g22675	NA	-0.868604	-0.515325	Not Interesting
13724	g22677	sp|Q8IWV2|CNTN4_HUMAN	-1.53871	-0.962155	Not Interesting
13727	g22677	sp|Q8IWV2|CNTN4_HUMAN	0.440582	0.407019	Not Interesting
1374	g11061	NA	1.25293	0.624128	Not Interesting
13742	g22679	NA	0.504107	0.607484	Not Interesting
13799	g22705	sp|A7E2Z9|K132L_BOVIN	-0.504188	-0.822158	Not Interesting
13823	g10818	sp|Q7TN88|PK1L2_MOUSE	-1.30127	-0.974133	Not Interesting
13861	g234	sp|P05933|CALM_SCHPO	0.767255	0.467228	Not Interesting
13886	g240	sp|P25325|THTM_HUMAN	0.934585	1.72546	Not Interesting
1390	g11069	sp|Q9VAI0|GNA1_DROME	0.413064	0.331673	Not Interesting
13906	g245	sp|A7MB28|NDRG3_BOVIN	0.742121	0.815021	Not Interesting
13910	g245	sp|A7MB28|NDRG3_BOVIN	1.65627	0.805278	Not Interesting
1394	g11070	sp|Q5TCZ1|SPD2A_HUMAN	-0.556605	-0.551502	Not Interesting
13944	g266	sp|Q5XHF8|VIP2_XENLA	-0.269701	-0.634828	Not Interesting
13948	g268	sp|Q5REW1|IYD1_PONAB	-0.835596	-0.52052	Not Interesting
13950	g269	sp|Q9BGT1|TTC9C_MACFA	3.74448	3.32756	Not Interesting
1397	g16757	sp|Q5RED8|CYLD_PONAB	-0.583349	-0.524793	Not Interesting
13994	g14067	sp|Q3UYK3|TBCD9_MOUSE	-1.05944	-0.90055	Not Interesting
13996	g14067	sp|Q3UYK3|TBCD9_MOUSE	-0.494729	-0.497585	Not Interesting
14004	g14070	sp|Q14766|LTBP1_HUMAN	0.886513	0.537532	Not Interesting
14049	g14088	sp|D3YXG0|HMCN1_MOUSE	-0.68765	-0.876872	Not Interesting
14066	g14094	NA	0.943664	0.562651	Not Interesting
14142	g9073	sp|C6KSQ6|RAD50_PLAF7	-0.776828	-1.0583	Not Interesting
14202	g31198	sp|Q8R4T9|UT2_MOUSE	-0.864287	-0.978248	Not Interesting
14204	g31198	sp|Q8R4T9|UT2_MOUSE	-0.949563	-0.747552	Not Interesting
14227	g20055	NA	-0.619346	-0.699501	Not Interesting
14248	g20062	sp|P18761|CAH6_MOUSE	-0.544248	-0.470424	Not Interesting
14315	g20083	sp|O57525|CP17A_RANDY	2.35298	1.98479	Not Interesting
14348	g20096	NA	1.83998	1.33895	Not Interesting
14349	g20096	NA	0.946232	0.642367	Not Interesting
14356	g20096	NA	-0.657766	-0.721041	Not Interesting
14427	g20106	sp|A5PN43|TM175_DANRE	-0.648508	-0.565925	Not Interesting
14455	g20115	NA	0.398557	0.25147	Not Interesting
14456	g20115	NA	0.58434	0.518137	Not Interesting
14460	g20117	NA	-1.20533	-1.02095	Not Interesting
14529	g13387	NA	-0.459364	-0.649641	Not Interesting
14565	g21749	sp|P21328|RTJK_DROME	-0.88685	-0.838632	Not Interesting
14632	g21761	sp|Q9Y5R5|DMRT2_HUMAN	-0.811163	-0.666382	Not Interesting
14633	g21761	sp|Q9Y5R5|DMRT2_HUMAN	-0.706303	-0.34351	Not Interesting
14636	g21761	sp|Q9Y5R5|DMRT2_HUMAN	-0.678137	-0.517734	Not Interesting
14687	g21782	sp|P13135|CPNS1_BOVIN	0.536916	0.728881	Not Interesting
14688	g21782	sp|P13135|CPNS1_BOVIN	1.05265	0.69793	Not Interesting
14733	g21793	NA	-0.996575	-1.12101	Not Interesting
14746	g21798	sp|Q8BGF8|S35D3_MOUSE	0.364998	0.229962	Not Interesting
14770	g21807	sp|Q6AXJ9|CDKL1_DANRE	-1.02387	-0.78435	Not Interesting
14816	g22268	NA	0.65477	0.539616	Not Interesting
14818	g22268	NA	0.920539	0.700409	Not Interesting
14819	g22268	NA	0.811088	0.715917	Not Interesting
14852	g22276	sp|P30664|MCM4B_XENLA	-1.19258	-1.27423	Not Interesting
14894	g24469	NA	-0.652241	-0.766526	Not Interesting
14939	g3220	sp|Q9TWL9|COMA_CONMA	0.579173	0.526985	Not Interesting
14950	g3222	sp|A6YP92|ARX_RAT	0.729678	0.153017	Not Interesting
15007	g12118	NA	-0.35304	-0.523559	Not Interesting
15016	g5381	NA	-0.832826	-0.54604	Not Interesting
15038	g9381	NA	-0.781924	-1.19346	Not Interesting
15039	g9381	NA	-0.750506	-0.38577	Not Interesting
1504	g6635	sp|Q7Z7L7|ZER1_HUMAN	-0.732491	-0.687865	Not Interesting
15088	g9398	sp|Q5E9Y6|PRUNE_BOVIN	0.480418	0.489914	Not Interesting
15175	g13666	NA	-1.52113	-1.10044	Not Interesting
15184	g13672	sp|A4IHS2|BOP1_XENTR	0.456374	0.596253	Not Interesting
15288	g27925	sp|D2IYS2|TORSO_BOMMO	0.795005	0.78546	Not Interesting
15349	g27960	NA	-0.851413	-0.643424	Not Interesting
15352	g27960	NA	-1.62347	-2.72573	Not Interesting
15368	g9103	sp|O08912|GALT1_MOUSE	-0.687694	-0.799068	Not Interesting
15381	g9107	sp|D3YXS5|KIF28_MOUSE	-0.547521	-0.245104	Not Interesting
15409	g32575	NA	-1.03934	-0.91659	Not Interesting
15410	g32575	NA	-0.943521	-0.764683	Not Interesting
1544	g6648	sp|Q9C0J1|B3GN4_HUMAN	-0.924713	-1.06074	Not Interesting
15483	g13928	sp|Q6GM44|MARH5_XENLA	-0.633306	-0.78296	Not Interesting
1549	g6652	sp|O14672|ADA10_HUMAN	0.8274	0.767889	Not Interesting
15496	g13929	sp|Q5RA22|5NTC_PONAB	0.46365	0.827485	Not Interesting
15543	g13939	sp|Q9CPU4|MGST3_MOUSE	-0.743665	-0.708538	Not Interesting
15566	g13950	NA	-0.890321	-0.644921	Not Interesting
15574	g8398	sp|Q07994|NCPR_MUSDO	1.59053	1.25435	Not Interesting
15575	g8398	sp|Q07994|NCPR_MUSDO	1.59385	1.35957	Not Interesting
15576	g8398	sp|Q07994|NCPR_MUSDO	1.89067	1.06164	Not Interesting
15578	g8398	sp|Q07994|NCPR_MUSDO	1.63233	1.46986	Not Interesting
15633	g8426	NA	0.469216	0.432926	Not Interesting
15635	g8427	sp|Q8JI28|TLL1_XENLA	1.37722	1.3419	Not Interesting
15670	NA	NA	-0.783633	-0.822265	Not Interesting
15674	g32900	NA	1.83057	2.19743	Not Interesting
15704	g32919	NA	-0.428697	-0.692663	Not Interesting
15705	g32919	NA	-1.17239	-1.06036	Not Interesting
1571	g6657	sp|Q8NI77|KI18A_HUMAN	0.757682	0.998317	Not Interesting
15716	g32919	NA	-1.26634	-1.18687	Not Interesting
15717	g32919	NA	-1.72456	-1.88017	Not Interesting
15718	g32919	NA	-1.22239	-0.964213	Not Interesting
15726	g32919	NA	0.936123	0.292148	Not Interesting
15784	g7459	sp|P78325|ADAM8_HUMAN	-0.648773	-0.876753	Not Interesting
1583	g6658	sp|Q9D489|SOLH2_MOUSE	-0.389863	-0.65016	Not Interesting
15836	g167	NA	-0.86157	-1.08094	Not Interesting
15893	g187	sp|Q96ES7|SGF29_HUMAN	-0.973834	-0.486205	Not Interesting
15915	g196	sp|Q9PV90|RLA0_DANRE	-0.543962	-0.741398	Not Interesting
15927	g202	sp|Q9Y5A9|YTHD2_HUMAN	0.439527	0.243159	Not Interesting
1593	g3599	NA	-0.817245	-0.738906	Not Interesting
15961	g213	NA	-0.963791	-0.775073	Not Interesting
16001	g4669	sp|Q7ZWA3|RBMX_DANRE	-0.490313	-0.445743	Not Interesting
16003	g4670	NA	1.35452	1.17359	Not Interesting
16004	g4670	NA	1.17076	0.698036	Not Interesting
16006	g4670	NA	0.791139	0.344244	Not Interesting
16008	g4670	NA	-0.263933	-0.627267	Not Interesting
16011	g4670	NA	0.430903	0.48175	Not Interesting
16086	g4757	NA	0.874868	0.880815	Not Interesting
1609	g3605	NA	-0.513285	-0.321959	Not Interesting
16096	g1738	NA	-0.785239	-1.25716	Not Interesting
16107	g1742	sp|Q5XXP2|OPN4_PHOSU	0.940835	1.28354	Not Interesting
16108	g1742	sp|Q5XXP2|OPN4_PHOSU	0.556138	1.27435	Not Interesting
16111	g1743	sp|Q16363|LAMA4_HUMAN	1.67017	1.62152	Not Interesting
16121	g1744	sp|Q00174|LAMA_DROME	0.724212	0.673757	Not Interesting
16147	g1749	sp|Q28F07|ANM1_XENTR	-0.455271	-0.579435	Not Interesting
16172	g1757	NA	0.820305	0.732347	Not Interesting
16173	g1758	NA	-0.626458	-1.05252	Not Interesting
1618	g3604	sp|Q01063|PDE4D_MOUSE	-0.747319	-0.289354	Not Interesting
1619	g3607	sp|Q9H5L6|THAP9_HUMAN	-0.586372	-0.463574	Not Interesting
16196	g1764	NA	-1.02303	-0.893291	Not Interesting
16197	g1765	sp|Q9Y376|CAB39_HUMAN	-0.955802	-0.766978	Not Interesting
16198	g1765	sp|Q9Y376|CAB39_HUMAN	-1.11163	-1.21676	Not Interesting
16213	g1768	sp|Q6GP53|NAA50_XENLA	-0.937903	-1.17888	Not Interesting
16214	g1769	NA	-0.598405	-0.731472	Not Interesting
16231	g1775	NA	-0.961857	-0.976503	Not Interesting
16395	g1849	NA	0.387768	0.897303	Not Interesting
16402	g1851	NA	-0.986383	-0.844313	Not Interesting
16412	g1856	NA	0.61652	0.709014	Not Interesting
16428	g1858	sp|Q2Z1R2|SOX1B_DANRE	-1.1161	-0.659777	Not Interesting
16429	g1858	sp|Q2Z1R2|SOX1B_DANRE	-1.3358	-1.0054	Not Interesting
16436	g1865	sp|Q95SX7|RTBS_DROME	-0.360468	-0.475394	Not Interesting
16475	g1872	sp|Q9ULB1|NRX1A_HUMAN	0.499399	0.722616	Not Interesting
16495	g1874	sp|P56945|BCAR1_HUMAN	-0.782826	-0.551055	Not Interesting
16525	g1881	sp|O43402|EMC8_HUMAN	-0.366036	-0.525499	Not Interesting
16544	g1882	sp|Q99L88|SNTB1_MOUSE	-0.871746	-0.94238	Not Interesting
16549	g1882	sp|Q99L88|SNTB1_MOUSE	-0.535302	-0.781179	Not Interesting
1655	g3626	NA	-0.776587	-1.08334	Not Interesting
16611	g6667	NA	-0.966471	-0.249092	Not Interesting
16622	g6671	NA	-1.27583	-1.2116	Not Interesting
16647	g13899	sp|C6KSQ6|RAD50_PLAF7	-2.30251	-1.53941	Not Interesting
16675	g13906	sp|Q5ZJ65|FA76A_CHICK	0.474722	0.241424	Not Interesting
16678	g13906	sp|Q5ZJ65|FA76A_CHICK	-0.523659	-0.485028	Not Interesting
16681	g13907	sp|O88866|HUNK_MOUSE	-0.770859	-0.837623	Not Interesting
16683	g13907	sp|O88866|HUNK_MOUSE	0.590273	0.557525	Not Interesting
16684	g13907	sp|O88866|HUNK_MOUSE	1.32755	1.52922	Not Interesting
16686	g13907	sp|O88866|HUNK_MOUSE	-0.47111	-0.211499	Not Interesting
16703	g13917	NA	1.51293	1.884	Not Interesting
16704	g13917	NA	1.99746	1.22931	Not Interesting
16793	g47	NA	0.780555	0.479715	Not Interesting
16794	g46	sp|Q86WA9|S2611_HUMAN	0.536515	0.219942	Not Interesting
16821	NA	NA	0.603733	0.411316	Not Interesting
16822	NA	NA	0.518423	0.637502	Not Interesting
16856	g33242	NA	3.05523	1.97295	Not Interesting
16862	g33243	sp|P21328|RTJK_DROME	-0.582473	-0.547123	Not Interesting
17033	g11732	NA	1.25311	0.737731	Not Interesting
17034	g11732	NA	0.510647	0.684587	Not Interesting
17052	g11736	sp|Q91770|NOT2_XENLA	-0.502523	-0.505535	Not Interesting
17076	g11745	sp|Q90623|MYPT1_CHICK	0.758896	0.727671	Not Interesting
17189	g1705	sp|Q8N8A2|ANR44_HUMAN	-0.184008	-0.835968	Not Interesting
17209	g33723	sp|Q96GG9|DCNL1_HUMAN	0.617859	0.381079	Not Interesting
17240	g33729	sp|A4J6H7|HEM3_DESRM	-0.629708	-0.780367	Not Interesting
17256	g33731	sp|P70566|TMOD2_RAT	-1.37654	-1.18456	Not Interesting
17259	g33731	sp|P70566|TMOD2_RAT	-0.756833	-0.767225	Not Interesting
17261	g33731	sp|P70566|TMOD2_RAT	-1.08634	-1.15125	Not Interesting
17318	g33744	NA	-1.12524	-1.04099	Not Interesting
1732	g26908	NA	1.1302	0.600343	Not Interesting
17323	g33744	NA	-0.922854	-0.840074	Not Interesting
17356	g33753	sp|Q923U9|S40A1_RAT	-0.807373	-0.578378	Not Interesting
1743	g26915	NA	1.11417	0.981133	Not Interesting
17486	g14267	sp|Q921D9|GRHL1_MOUSE	-2.22534	-1.72066	Not Interesting
17556	g9900	sp|P0CF95|BICL1_DANRE	2.39731	1.76883	Not Interesting
1771	g28526	sp|Q60855|RIPK1_MOUSE	-0.425212	-0.495739	Not Interesting
17750	g12039	sp|Q505D9|TRI67_MOUSE	0.956181	0.766501	Not Interesting
17760	g12041	NA	1.06381	0.560654	Not Interesting
17764	g12042	NA	1.39456	1.14936	Not Interesting
17780	g12046	sp|Q63150|DPYS_RAT	-0.247622	-0.576715	Not Interesting
17796	g12055	NA	-0.509359	-0.515292	Not Interesting
17797	g12055	NA	-1.4641	-1.43137	Not Interesting
17801	g12056	NA	-0.376949	-0.126723	Not Interesting
17829	g12059	sp|Q8X034|RL15_NEUCR	-0.628955	-0.703965	Not Interesting
17834	g12061	sp|Q08DQ2|GFPT2_BOVIN	1.01581	0.777851	Not Interesting
17838	g12061	sp|Q08DQ2|GFPT2_BOVIN	1.83087	1.64836	Not Interesting
17851	g9559	NA	0.463035	0.0510834	Not Interesting
17878	g9565	sp|Q27746|DNMT1_PARLI	0.368419	0.495141	Not Interesting
17909	g9572	sp|P26436|ASPX_HUMAN	0.814301	0.627966	Not Interesting
17929	g9576	sp|B5X4E0|CALUB_SALSA	-0.766142	-0.900885	Not Interesting
1793	NA	NA	-0.612214	-0.358549	Not Interesting
17945	g9580	sp|Q80VW5|WHRN_MOUSE	0.65977	0.912269	Not Interesting
17967	g8541	sp|Q9QZD5|RAE2_MOUSE	-1.11153	-1.06723	Not Interesting
17969	g8549	sp|Q58CP9|STIM1_BOVIN	-0.425788	-0.615939	Not Interesting
17975	g8550	sp|Q9UHC3|ASIC3_HUMAN	-1.3057	-1.146	Not Interesting
17977	g8550	sp|Q9UHC3|ASIC3_HUMAN	0.849904	0.483317	Not Interesting
17993	g8553	sp|D2CLZ9|ATOH8_DANRE	-0.387463	-0.585956	Not Interesting
180	g18915	sp|Q6TLH3|CUED2_DANRE	1.26189	0.954319	Not Interesting
18013	g8566	sp|E9Q414|APOB_MOUSE	-0.535878	-0.531364	Not Interesting
18039	g8573	NA	-0.840546	-0.80755	Not Interesting
18044	g8574	NA	-0.39869	-0.498092	Not Interesting
18049	g8574	NA	-1.16564	-1.13675	Not Interesting
18079	g8589	sp|Q5ZKP7|S2536_CHICK	-0.48606	-0.54143	Not Interesting
18136	g8604	sp|Q58D06|WDR74_BOVIN	-0.98732	-1.14037	Not Interesting
18235	g32581	sp|Q5M9G0|DCTD_RAT	0.726636	0.70754	Not Interesting
18239	g32582	sp|Q1W617|SHRM4_MOUSE	-1.22946	-1.26797	Not Interesting
18240	g32582	sp|Q1W617|SHRM4_MOUSE	-0.780756	-0.68975	Not Interesting
18241	g32582	sp|Q1W617|SHRM4_MOUSE	-1.54436	-1.25698	Not Interesting
18257	g32585	sp|Q9Z125|CR3L1_MOUSE	0.609485	0.57027	Not Interesting
18258	g32585	sp|Q9Z125|CR3L1_MOUSE	0.78944	0.317398	Not Interesting
18259	g32585	sp|Q9Z125|CR3L1_MOUSE	1.07896	0.9059	Not Interesting
18262	g32585	sp|Q9Z125|CR3L1_MOUSE	1.35789	1.46398	Not Interesting
18287	NA	NA	-0.354074	-0.334766	Not Interesting
18295	g15773	NA	0.742699	0.890829	Not Interesting
18297	g15773	NA	0.606182	0.366693	Not Interesting
18306	g15774	sp|P51577|P2RX4_RAT	0.48359	0.603292	Not Interesting
18307	g15774	sp|P51577|P2RX4_RAT	1.14958	1.52638	Not Interesting
18347	g15789	sp|P22182|FGFR1_XENLA	1.84006	1.49399	Not Interesting
1835	g10556	sp|P49010|HEXC_BOMMO	-1.17426	-1.3052	Not Interesting
18380	g26099	NA	-0.767384	-0.878515	Not Interesting
18410	g26106	sp|Q5R9H4|A1CF_PONAB	-0.607199	-0.623641	Not Interesting
18414	g26107	sp|Q9BQS2|SYT15_HUMAN	-0.806602	-0.893177	Not Interesting
1844	g10564	sp|O00370|LORF2_HUMAN	-1.05354	-0.713047	Not Interesting
18441	g26120	sp|P98191|CDS1_MOUSE	-0.851866	-0.61338	Not Interesting
1850	g10565	sp|Q9WVM4|ICMT_RAT	-0.66231	-0.535775	Not Interesting
18501	g2865	NA	-1.05619	-0.81869	Not Interesting
18515	g2869	NA	-0.784109	-0.482355	Not Interesting
18531	NA	NA	-0.714197	-0.653728	Not Interesting
18564	NA	NA	-0.764569	-0.726056	Not Interesting
18579	g18032	NA	1.54152	1.44171	Not Interesting
18589	g18035	NA	-0.981147	-0.994834	Not Interesting
18637	g32018	sp|Q24547|STX1A_DROME	1.31041	1.32317	Not Interesting
18652	g13299	sp|Q8CG19|LTBP1_MOUSE	0.913007	0.651883	Not Interesting
18667	g11330	sp|Q9KWN0|AHV_ACTSK	0.515628	0.7003	Not Interesting
18693	g5384	NA	1.42277	1.24921	Not Interesting
18710	g5390	NA	0.791797	0.685184	Not Interesting
18728	g5392	NA	-0.495841	-0.688884	Not Interesting
18756	g5398	NA	-1.53864	-1.12113	Not Interesting
1876	g16741	NA	0.508003	0.766776	Not Interesting
1877	g16741	NA	-0.574841	-0.371728	Not Interesting
18789	g65	NA	-0.450245	-0.227276	Not Interesting
18792	g65	NA	-1.5337	-0.977459	Not Interesting
18799	g68	sp|O57525|CP17A_RANDY	-0.978695	-0.61377	Not Interesting
18820	g69	sp|O57460|TLL1_DANRE	-1.1371	-1.64837	Not Interesting
18870	g11088	NA	-1.07417	-0.742414	Not Interesting
1890	g16742	NA	-0.482496	-0.493534	Not Interesting
1892	g16743	NA	-0.381916	-0.324418	Not Interesting
18948	g25443	NA	-1.26383	-1.1622	Not Interesting
19012	g25486	NA	0.729595	0.721275	Not Interesting
19062	g25501	NA	1.93727	1.15053	Not Interesting
19064	g25502	sp|Q7ZYA0|LMBD2_XENLA	0.566246	0.488853	Not Interesting
19072	g25504	sp|Q5XI59|RNF10_RAT	0.714506	0.536565	Not Interesting
19155	g2509	NA	0.69955	0.62325	Not Interesting
19266	g13566	NA	-0.890311	-1.01265	Not Interesting
19319	g16876	sp|A7RU46|NAPA_NEMVE	0.78678	0.559029	Not Interesting
19321	g16876	sp|A7RU46|NAPA_NEMVE	0.53272	0.618788	Not Interesting
19332	g16879	sp|Q9VSF3|UBC12_DROME	3.10584	2.32862	Not Interesting
19333	g16879	sp|Q9VSF3|UBC12_DROME	2.64191	2.10303	Not Interesting
19388	g16903	NA	-0.54754	-0.39311	Not Interesting
19413	g16907	sp|B3EWZ6|MLRP2_ACRMI	-1.07021	-0.983833	Not Interesting
19444	g10729	NA	-1.55578	-1.17703	Not Interesting
19485	g21987	sp|P56522|ADRO_RAT	-0.503644	-0.400326	Not Interesting
19503	g21991	sp|Q3T075|STX8_BOVIN	0.584414	0.537145	Not Interesting
19508	g21993	sp|P24733|MYS_ARGIR	1.38227	1.56203	Not Interesting
19522	g21995	sp|Q05000|MYS_PODCA	-2.17499	-2.05782	Not Interesting
19541	g15762	sp|Q6P3X8|PGBD2_HUMAN	-1.44207	-1.01347	Not Interesting
19543	g15763	NA	-0.702944	-0.724241	Not Interesting
19544	g15763	NA	-0.76201	-0.801136	Not Interesting
19602	g13799	NA	1.1924	0.705632	Not Interesting
19612	g13800	sp|Q6PH57|GBB1_DANRE	-0.639009	-0.32206	Not Interesting
19619	g13800	sp|Q6PH57|GBB1_DANRE	-0.644427	-0.550022	Not Interesting
19632	g13803	sp|Q6ING7|FLAD1_XENLA	0.642823	0.331905	Not Interesting
19693	g4067	NA	-0.435673	-0.271162	Not Interesting
19699	g4073	sp|P48766|NAC1_CAVPO	-0.831642	-0.691278	Not Interesting
19713	g4080	sp|Q53H47|SETMR_HUMAN	-0.862394	-0.440648	Not Interesting
19734	g4084	sp|Q9QZC7|PKHB2_MOUSE	0.916715	0.422868	Not Interesting
19748	g4091	sp|Q8NB59|SYT14_HUMAN	-0.7293	-0.602588	Not Interesting
19749	g4091	sp|Q8NB59|SYT14_HUMAN	-1.15249	-0.892027	Not Interesting
1975	g30824	sp|Q08DK7|MCATL_BOVIN	-0.593366	-0.567144	Not Interesting
19758	g4092	NA	0.937775	0.942877	Not Interesting
19764	g4095	NA	-0.714655	-0.650653	Not Interesting
19772	g4104	sp|Q95SX7|RTBS_DROME	0.42124	0.485739	Not Interesting
19823	g23620	sp|P61315|G3ST3_MOUSE	-0.573613	-0.42872	Not Interesting
19826	g23620	sp|P61315|G3ST3_MOUSE	1.28521	1.2735	Not Interesting
19847	g23635	NA	-0.853094	-0.934573	Not Interesting
19852	g23638	sp|Q9UIK4|DAPK2_HUMAN	-0.84242	-0.723597	Not Interesting
19887	g8888	NA	0.814192	0.757783	Not Interesting
19899	NA	NA	-0.940361	-1.05213	Not Interesting
19924	g2672	NA	-1.19641	-0.741505	Not Interesting
19946	g14016	NA	0.972486	0.650925	Not Interesting
19949	g14016	NA	-0.630151	-0.538806	Not Interesting
19954	g14017	NA	0.772312	0.751769	Not Interesting
19957	g14018	sp|Q15063|POSTN_HUMAN	-1.25262	-0.702199	Not Interesting
19959	g14018	sp|Q15063|POSTN_HUMAN	-0.648485	-0.545015	Not Interesting
19960	g14018	sp|Q15063|POSTN_HUMAN	-1.19785	-0.73607	Not Interesting
1997	g30827	NA	0.98956	0.649333	Not Interesting
19970	g14025	sp|P60670|NPL4_MOUSE	-0.754984	-0.716254	Not Interesting
19981	g14033	sp|Q5F3I6|TM104_CHICK	1.12962	0.702709	Not Interesting
19986	g14034	NA	1.45976	1.55112	Not Interesting
2	g5776	sp|Q82P90|IABF_STRAW	0.648854	0.206695	Not Interesting
20027	g21930	sp|Q4R3D6|ZMYM5_MACFA	-1.04378	-0.88823	Not Interesting
20100	g7738	NA	0.793597	0.338046	Not Interesting
20139	g10585	sp|Q8IZJ1|UNC5B_HUMAN	0.866624	0.584387	Not Interesting
20156	g10588	sp|Q9V785|3BP5H_DROME	1.25198	0.860779	Not Interesting
20187	g10594	sp|O35426|XBP1_MOUSE	1.08148	0.860786	Not Interesting
20216	g10600	NA	-0.946078	-1.17223	Not Interesting
20219	g10604	sp|P49715|CEBPA_HUMAN	-0.681949	-0.632976	Not Interesting
20220	g10604	sp|P49715|CEBPA_HUMAN	-0.668639	-0.468901	Not Interesting
20222	g10604	sp|P49715|CEBPA_HUMAN	-0.577526	-0.398908	Not Interesting
203	g18921	sp|Q9YGW7|DAZL_DANRE	1.00905	0.887574	Not Interesting
20302	g7859	sp|P32674|PFLD_ECOLI	1.04504	0.974458	Not Interesting
20303	g7859	sp|P32674|PFLD_ECOLI	1.05245	0.655139	Not Interesting
20316	g7862	NA	0.811209	0.821261	Not Interesting
20346	g7872	sp|Q8R4V5|OIT3_MOUSE	0.911194	0.476885	Not Interesting
20397	g1266	sp|O16025|AOSL_PLEHO	-1.12402	-0.810745	Not Interesting
20512	g8475	sp|Q5F485|DDX42_CHICK	0.398833	0.35002	Not Interesting
20523	g8479	NA	-1.00696	-0.619109	Not Interesting
20525	g8480	NA	-0.512331	-0.413155	Not Interesting
20553	g8496	sp|Q5XIN3|MIPT3_RAT	1.1973	0.669523	Not Interesting
20564	g8497	sp|O42350|CO1A2_LITCT	-0.656725	-0.772586	Not Interesting
20566	g8497	sp|O42350|CO1A2_LITCT	-1.15665	-1.02464	Not Interesting
20579	g8503	NA	-1.3453	-1.45445	Not Interesting
20582	g8504	NA	-0.732524	-0.715381	Not Interesting
2059	g308	sp|O00222|GRM8_HUMAN	0.594729	0.575841	Not Interesting
2060	g308	sp|O00222|GRM8_HUMAN	-1.22755	-1.17048	Not Interesting
20606	g8511	sp|Q1LZ71|LFG2_BOVIN	0.904904	0.759028	Not Interesting
2061	g308	sp|O00222|GRM8_HUMAN	-1.36045	-0.858781	Not Interesting
20658	g8046	sp|Q9NYT0|PLEK2_HUMAN	0.37141	0.217618	Not Interesting
20684	g13882	NA	0.724259	0.584891	Not Interesting
20728	g25556	sp|A7E2S9|A30BL_HUMAN	0.655607	0.438823	Not Interesting
20730	g25556	sp|A7E2S9|A30BL_HUMAN	1.2544	1.40179	Not Interesting
20731	g25556	sp|A7E2S9|A30BL_HUMAN	1.48194	1.45273	Not Interesting
20734	g25557	sp|Q9H1Y3|OPN3_HUMAN	0.663533	0.553364	Not Interesting
20736	g25557	sp|Q9H1Y3|OPN3_HUMAN	-0.962788	-1.1106	Not Interesting
20753	g25564	NA	2.28919	2.15413	Not Interesting
20756	g25565	sp|Q8AVY1|ODF3A_XENLA	-0.595293	-0.499729	Not Interesting
20787	g25574	NA	-0.528375	-0.406531	Not Interesting
20835	g25581	sp|Q2KJG3|SYNC_BOVIN	2.32495	1.71992	Not Interesting
20837	g25581	sp|Q2KJG3|SYNC_BOVIN	2.53529	1.646	Not Interesting
20852	g25586	sp|Q5T1C6|THEM4_HUMAN	-0.859304	-0.432177	Not Interesting
20884	g12906	sp|Q02556|IRF8_HUMAN	-0.567764	-0.734387	Not Interesting
20901	g12915	sp|O45818|DKF2_CAEEL	-0.901847	-0.541784	Not Interesting
20911	g12918	NA	-0.594573	-0.43631	Not Interesting
20919	g12926	NA	-1.14483	-1.00798	Not Interesting
21025	g12949	sp|Q8NHV1|GIMA7_HUMAN	-0.814241	-0.833775	Not Interesting
21032	g12951	NA	0.780982	0.773507	Not Interesting
21033	g12951	NA	0.726134	0.901315	Not Interesting
21048	g12966	NA	0.650688	0.500301	Not Interesting
21077	g21184	NA	-0.666786	-0.512902	Not Interesting
21099	g5150	sp|Q12802|AKP13_HUMAN	1.05056	0.772161	Not Interesting
21100	g5150	sp|Q12802|AKP13_HUMAN	1.70932	1.29148	Not Interesting
21104	g5150	sp|Q12802|AKP13_HUMAN	0.814328	0.49682	Not Interesting
21138	g5158	NA	0.572873	0.368306	Not Interesting
21139	g5158	NA	0.597662	0.713542	Not Interesting
21160	g21719	NA	0.922259	0.628203	Not Interesting
2121	g322	NA	-0.593187	-0.410917	Not Interesting
21246	g23847	sp|Q2KN96|CYTSA_XENTR	-1.27072	-0.998647	Not Interesting
21247	g23847	sp|Q2KN96|CYTSA_XENTR	-1.57827	-1.09158	Not Interesting
21252	g23847	sp|Q2KN96|CYTSA_XENTR	-1.44693	-1.59793	Not Interesting
21271	g23856	NA	1.95168	1.28933	Not Interesting
21290	g23866	sp|P17713|STK_HYDVU	0.588672	0.369699	Not Interesting
21305	g23869	NA	-0.739228	-0.848476	Not Interesting
21316	g23869	NA	-0.26452	-0.525562	Not Interesting
21367	g17928	NA	-1.16438	-0.820641	Not Interesting
21369	g17928	NA	-0.935233	-0.51234	Not Interesting
21396	g30657	sp|Q32KX5|LRC28_BOVIN	1.37522	1.11521	Not Interesting
2142	g324	NA	-0.737444	-1.05186	Not Interesting
21430	g30665	sp|Q2T9S3|RPC6_BOVIN	-1.17654	-0.846545	Not Interesting
21444	g30671	sp|J3S6Y1|TSEAR_MOUSE	-2.17848	-1.77186	Not Interesting
21454	g30674	sp|B3STU3|CHAC1_RAT	1.30373	0.547806	Not Interesting
21489	g17462	NA	1.05541	0.825542	Not Interesting
21498	g17463	sp|P51476|OPSP_COLLI	0.613602	0.969611	Not Interesting
21510	g17465	sp|Q9H8Y8|GORS2_HUMAN	0.974045	0.256925	Not Interesting
21513	g17466	sp|P46222|RL11_DROME	-0.5084	-0.479304	Not Interesting
21581	g20718	sp|Q6PAM0|AAKB2_MOUSE	1.53564	0.831385	Not Interesting
21622	g20727	sp|Q96AY4|TTC28_HUMAN	0.785977	0.546122	Not Interesting
21630	g20728	sp|P22897|MRC1_HUMAN	-0.995989	-0.596992	Not Interesting
21643	g20735	sp|P35546|RET_MOUSE	-0.544256	-0.777368	Not Interesting
217	g18923	NA	-0.677045	-0.71572	Not Interesting
21701	g28430	NA	0.806465	0.577178	Not Interesting
21703	g28430	NA	1.17801	0.918664	Not Interesting
21704	g28430	NA	0.717688	0.84221	Not Interesting
21710	g28434	sp|P35072|TCB1_CAEBR	0.97549	0.81802	Not Interesting
2175	g332	NA	1.73489	1.39147	Not Interesting
21755	g33035	sp|Q922R0|PRKX_MOUSE	0.677556	0.552768	Not Interesting
21759	g33035	sp|Q922R0|PRKX_MOUSE	0.604865	0.80743	Not Interesting
2183	g334	sp|Q9BUZ4|TRAF4_HUMAN	-0.741261	-0.773208	Not Interesting
21830	g9992	NA	1.0109	0.793213	Not Interesting
21833	g9992	NA	0.933787	0.591407	Not Interesting
21838	g9993	NA	0.989842	0.871023	Not Interesting
21842	g9994	sp|Q2W2L2|RS11_MAGSA	-0.986159	-0.936422	Not Interesting
21890	g10014	sp|P55199|ELL_HUMAN	-0.460707	-0.287384	Not Interesting
21900	g10017	sp|Q2KIA2|TR112_BOVIN	-0.62014	-0.87398	Not Interesting
21907	g10018	sp|Q4I963|COFI_GIBZE	-0.800445	-0.725202	Not Interesting
21911	g10020	sp|P70057|KCNQ1_XENLA	0.613601	0.471241	Not Interesting
21927	g10027	sp|P0C6Y7|PRDM9_RAT	-0.697119	-0.739067	Not Interesting
21949	g10034	sp|P08419|CEL2A_PIG	0.782923	0.48319	Not Interesting
22030	g10055	NA	0.38852	0.339207	Not Interesting
22049	g10067	NA	-0.677734	-0.552079	Not Interesting
22051	g10067	NA	-0.826448	-0.562737	Not Interesting
22085	g10084	sp|P27448|MARK3_HUMAN	0.590607	0.760831	Not Interesting
22087	g10084	sp|P27448|MARK3_HUMAN	-0.635284	-0.613084	Not Interesting
22096	g10084	sp|P27448|MARK3_HUMAN	-0.913161	-0.797869	Not Interesting
22151	g10106	sp|Q96PZ7|CSMD1_HUMAN	-0.773913	-0.634296	Not Interesting
22153	g10106	sp|Q96PZ7|CSMD1_HUMAN	-0.745022	-0.572004	Not Interesting
22201	g3246	NA	-1.08736	-0.90299	Not Interesting
22239	g33693	sp|P18428|LBP_HUMAN	-1.20988	-1.62388	Not Interesting
22253	g33693	sp|P18428|LBP_HUMAN	-0.506924	-0.621981	Not Interesting
22267	g33696	sp|Q5PQJ7|TBCEL_RAT	0.496233	0.628602	Not Interesting
22268	g33696	sp|Q5PQJ7|TBCEL_RAT	2.1036	1.83689	Not Interesting
22308	g33712	NA	-0.316195	-0.74635	Not Interesting
22313	g33712	NA	0.712619	0.520525	Not Interesting
22336	g33718	sp|Q9D361|SNR48_MOUSE	0.852268	0.608198	Not Interesting
22379	g31978	sp|Q9VUW9|HIP14_DROME	-0.401757	-0.274996	Not Interesting
22393	g31982	sp|Q9YHD3|BAG6A_XENLA	2.24916	1.36078	Not Interesting
22432	g26533	NA	-0.458488	-0.585583	Not Interesting
22456	g26540	sp|Q6R2W3|SCND3_HUMAN	-1.42743	-1.03799	Not Interesting
22471	g21461	NA	-1.64854	-1.62748	Not Interesting
22477	g21462	NA	-0.725229	-0.450568	Not Interesting
2249	g371	sp|Q9GM70|ST17A_RABIT	-0.674218	-0.898094	Not Interesting
2251	g371	sp|Q9GM70|ST17A_RABIT	-1.45883	-1.11904	Not Interesting
22593	g4292	NA	0.632279	0.801593	Not Interesting
22596	g4292	NA	-0.577008	-0.676625	Not Interesting
22634	g11186	NA	1.51018	1.13185	Not Interesting
22741	g29101	sp|P79282|FUT8_PIG	-0.685938	-0.499589	Not Interesting
22756	g29107	sp|Q7ZWS1|DUS3L_XENLA	-0.838258	-0.609466	Not Interesting
22848	g29132	sp|Q9Y6P5|SESN1_HUMAN	-0.564865	-0.746288	Not Interesting
22900	g29138	NA	-1.1892	-1.1616	Not Interesting
2291	g387	sp|Q9VXN0|GTDC1_DROME	-0.716915	-0.4378	Not Interesting
22934	g29153	sp|Q99LZ3|SLD5_MOUSE	-0.981179	-0.741115	Not Interesting
23014	NA	NA	0.35583	0.536472	Not Interesting
23045	g15814	NA	-0.78282	-0.611758	Not Interesting
2305	g388	NA	0.791545	0.667691	Not Interesting
23058	g15817	sp|Q9JMD3|PCTL_MOUSE	0.527206	0.680321	Not Interesting
23091	g15826	sp|Q16659|MK06_HUMAN	-0.690209	-0.88266	Not Interesting
23094	g15826	sp|Q16659|MK06_HUMAN	-0.775097	-0.91517	Not Interesting
23095	g15827	NA	-0.598946	-0.541965	Not Interesting
23149	g15843	NA	0.406693	0.341113	Not Interesting
23181	g15863	sp|Q9WUK7|OPN3_MOUSE	-1.10931	-1.50323	Not Interesting
23215	g15881	sp|Q06725|N2F1A_DANRE	-1.08218	-1.00968	Not Interesting
23217	g15881	sp|Q06725|N2F1A_DANRE	-0.563066	-0.514984	Not Interesting
23220	g15882	sp|Q9Z1N9|UN13B_MOUSE	-1.44596	-1.30323	Not Interesting
23252	g15884	NA	-1.54672	-1.31221	Not Interesting
23261	g15894	sp|B5ZYI7|DUT_RHILW	0.537172	0.491863	Not Interesting
23263	g15894	sp|B5ZYI7|DUT_RHILW	0.77657	0.762102	Not Interesting
2328	g391	NA	-1.14812	-1.00797	Not Interesting
23298	g15901	NA	-0.297325	-0.774532	Not Interesting
23311	g15906	sp|P13804|ETFA_HUMAN	-1.02909	-1.02337	Not Interesting
23312	g15906	sp|P13804|ETFA_HUMAN	-0.752607	-0.530618	Not Interesting
23316	g15907	sp|O43581|SYT7_HUMAN	0.998408	0.633253	Not Interesting
23330	g15911	sp|Q3SZ27|MIC27_BOVIN	-0.458061	-0.26656	Not Interesting
23411	NA	NA	1.41024	1.42796	Not Interesting
23448	g30805	NA	1.1092	0.988654	Not Interesting
23478	g31477	sp|P17972|KCNAW_DROME	-0.702668	-0.520241	Not Interesting
23483	g31478	NA	1.01679	0.685952	Not Interesting
23523	g6061	sp|P09330|PRPS2_RAT	-0.633361	-0.39403	Not Interesting
23544	g6065	sp|C3YWU0|FUCO_BRAFL	0.974019	0.761985	Not Interesting
23609	g1591	sp|Q01973|ROR1_HUMAN	-0.604607	-0.479178	Not Interesting
23611	g1591	sp|Q01973|ROR1_HUMAN	-0.778566	-0.746916	Not Interesting
23614	g1591	sp|Q01973|ROR1_HUMAN	0.619671	0.523276	Not Interesting
23674	g1603	sp|P55809|SCOT1_HUMAN	1.14299	1.02497	Not Interesting
23690	g1605	sp|Q6P0Q8|MAST2_HUMAN	0.785757	0.399428	Not Interesting
23706	g1608	sp|P98155|VLDLR_HUMAN	0.707646	0.401061	Not Interesting
23723	g1609	sp|P21328|RTJK_DROME	-1.11168	-0.765344	Not Interesting
2378	g15013	sp|Q9CQ33|LZTR1_MOUSE	-0.930325	-0.712444	Not Interesting
23790	g1624	sp|Q61115|PTC1_MOUSE	0.874127	0.816104	Not Interesting
23871	g23177	sp|P70255|NFIC_MOUSE	-0.652716	-0.416701	Not Interesting
23873	g23177	sp|P70255|NFIC_MOUSE	1.01801	1.08907	Not Interesting
23943	g27513	NA	-0.76538	-0.796104	Not Interesting
23948	g27513	NA	1.81656	0.500995	Not Interesting
23966	NA	NA	-1.30941	-0.81848	Not Interesting
23983	g32977	NA	-1.42346	-1.30964	Not Interesting
24000	g32982	sp|Q5R6T1|PDIA6_PONAB	1.30922	1.03517	Not Interesting
2402	g15023	sp|O75146|HIP1R_HUMAN	0.841004	0.645612	Not Interesting
24027	g32989	sp|P48147|PPCE_HUMAN	1.3901	0.901517	Not Interesting
24031	g32989	sp|P48147|PPCE_HUMAN	0.996195	0.420751	Not Interesting
24033	g32990	NA	0.663143	0.750039	Not Interesting
24045	g32992	NA	-0.641336	-0.544851	Not Interesting
24048	g32992	NA	0.428812	0.402175	Not Interesting
24068	g33001	sp|A1A4J1|PFKAL_BOVIN	-0.813397	-0.456146	Not Interesting
24127	g8014	sp|Q95SX7|RTBS_DROME	0.477877	0.907761	Not Interesting
24157	g25396	NA	0.449031	0.499288	Not Interesting
24182	g12066	NA	-0.433925	-0.566233	Not Interesting
24184	g26195	NA	0.640086	1.42242	Not Interesting
2420	g15029	sp|P54632|1433_DICDI	1.05907	0.931341	Not Interesting
24203	g11786	sp|P61315|G3ST3_MOUSE	0.739158	0.72714	Not Interesting
24207	g11786	sp|P61315|G3ST3_MOUSE	1.68506	1.07996	Not Interesting
24209	g11786	sp|P61315|G3ST3_MOUSE	1.11555	0.797576	Not Interesting
2421	g15029	sp|P54632|1433_DICDI	0.556062	0.69727	Not Interesting
24250	g11799	sp|O73606|KCNG2_CHICK	-0.949162	-1.01582	Not Interesting
2430	g15033	sp|Q02040|AK17A_HUMAN	0.738812	0.878086	Not Interesting
24312	g11829	sp|Q7LKY2|ADDH_SCHPO	-0.347118	-0.452992	Not Interesting
24367	g11860	NA	-0.76304	-0.711127	Not Interesting
24379	g11866	NA	-0.175482	-0.928307	Not Interesting
24391	g11868	NA	-0.805957	-0.75543	Not Interesting
24393	g11868	NA	-0.737558	-0.54728	Not Interesting
24412	g11871	NA	-1.1794	-0.855591	Not Interesting
24435	g16424	NA	-0.442001	-0.620429	Not Interesting
24507	g1275	sp|P27918|PROP_HUMAN	-1.33036	-0.882096	Not Interesting
24514	g1276	sp|Q96RW7|HMCN1_HUMAN	-1.2359	-0.571658	Not Interesting
24521	g1276	sp|Q96RW7|HMCN1_HUMAN	-0.453143	-0.339241	Not Interesting
24522	g1276	sp|Q96RW7|HMCN1_HUMAN	-0.484475	-0.344753	Not Interesting
24524	g1278	NA	-0.761213	-0.428408	Not Interesting
24565	g6371	NA	0.408741	0.556423	Not Interesting
24566	g6372	sp|Q8BT14|CNOT4_MOUSE	0.929694	0.676237	Not Interesting
24596	g6382	sp|Q19269|NAS14_CAEEL	-0.601075	-0.479875	Not Interesting
24606	g6384	NA	-0.613548	-0.408995	Not Interesting
24608	g6385	NA	-0.59592	-0.97799	Not Interesting
24612	g6386	NA	-0.845445	-0.485158	Not Interesting
24616	g6387	sp|P08183|MDR1_HUMAN	2.21132	1.49659	Not Interesting
24717	g31546	NA	-0.622616	-0.684413	Not Interesting
24787	g19641	NA	0.557315	0.325037	Not Interesting
24793	g19642	sp|Q5SVZ6|ZMYM1_HUMAN	0.642882	0.413988	Not Interesting
24800	g33594	sp|Q7Z494|NPHP3_HUMAN	-0.956552	-0.977229	Not Interesting
24882	g23974	sp|Q7Z494|NPHP3_HUMAN	-0.908326	-0.525064	Not Interesting
24970	g26294	sp|Q9H0J9|PAR12_HUMAN	-0.580321	-0.466145	Not Interesting
24988	g26299	sp|Q9NR09|BIRC6_HUMAN	-2.12265	-1.83908	Not Interesting
24997	g26307	NA	-0.872866	-0.75556	Not Interesting
25011	g20580	sp|Q9U943|APLP_LOCMI	-0.634033	-0.775035	Not Interesting
25042	g20596	NA	0.7783	0.660885	Not Interesting
25043	g20596	NA	-0.732536	-0.731403	Not Interesting
25064	g27042	NA	-0.918135	-1.03482	Not Interesting
25076	g9403	NA	0.62566	0.649738	Not Interesting
25145	g6109	sp|Q3TCT4|ENTP7_MOUSE	1.1664	2.01546	Not Interesting
25152	g6116	sp|Q8WX94|NALP7_HUMAN	-1.13532	-0.970288	Not Interesting
25197	g6131	sp|O73853|CP17A_ICTPU	0.534509	0.300575	Not Interesting
25219	g6134	sp|Q7LHG5|YI31B_YEAST	1.02311	1.03317	Not Interesting
25227	g6135	sp|P08548|LIN1_NYCCO	-0.857831	-1.19495	Not Interesting
25238	g6138	NA	0.799432	0.447096	Not Interesting
25241	g6139	sp|Q03350|TSP2_MOUSE	-0.858284	-0.916594	Not Interesting
25252	g6141	sp|Q4UMH6|Y381_RICFE	-0.878254	-0.654434	Not Interesting
25255	g6142	sp|Q04202|TCB2_CAEBR	-0.647406	-0.970106	Not Interesting
25309	g6164	sp|Q9UHC6|CNTP2_HUMAN	-0.843059	-0.463078	Not Interesting
25310	g6164	sp|Q9UHC6|CNTP2_HUMAN	-1.01875	-0.737028	Not Interesting
25315	g6167	sp|Q8BH04|PCKGM_MOUSE	-1.1354	-0.979531	Not Interesting
25316	g6167	sp|Q8BH04|PCKGM_MOUSE	-0.632067	-0.315449	Not Interesting
25317	g6167	sp|Q8BH04|PCKGM_MOUSE	-0.601257	-0.465154	Not Interesting
25322	g6167	sp|Q8BH04|PCKGM_MOUSE	-1.4082	-1.44275	Not Interesting
25326	g6168	sp|P49263|PXN1_XENLA	-0.564726	-0.783888	Not Interesting
25330	g6168	sp|P49263|PXN1_XENLA	0.466496	0.565281	Not Interesting
25348	g6172	sp|P0DOC8|CH037_DANRE	0.304276	0.71283	Not Interesting
25355	g6173	sp|Q8BH04|PCKGM_MOUSE	0.394085	0.68656	Not Interesting
25359	g6173	sp|Q8BH04|PCKGM_MOUSE	0.509195	0.724655	Not Interesting
2537	g7626	sp|Q40302|CALM_MACPY	-0.463696	-0.548725	Not Interesting
2538	g7626	sp|Q40302|CALM_MACPY	-0.650425	-0.626531	Not Interesting
2541	g7629	sp|Q6NYB7|RAB1A_RAT	-0.879914	-0.872324	Not Interesting
25443	g6200	sp|Q9WTZ2|MBTP1_MOUSE	-0.991692	-0.570642	Not Interesting
2545	g7630	NA	-0.94854	-0.74737	Not Interesting
25530	g10552	NA	0.698445	0.624995	Not Interesting
25552	g6707	sp|Q9UGT4|SUSD2_HUMAN	1.28939	0.838725	Not Interesting
25553	g6707	sp|Q9UGT4|SUSD2_HUMAN	-0.444232	-0.502806	Not Interesting
25555	g6708	sp|Q5DU56|NLRC3_MOUSE	-0.473791	-0.791568	Not Interesting
25569	g10615	sp|Q10574|LIN32_CAEEL	-0.555707	-0.509113	Not Interesting
25574	g10616	sp|Q80U35|ARHGH_MOUSE	0.504821	0.297548	Not Interesting
25579	g10616	sp|Q80U35|ARHGH_MOUSE	-0.706806	-0.652149	Not Interesting
25612	g10637	sp|Q766D5|B4GN4_MOUSE	-0.781782	-0.754579	Not Interesting
25633	g10648	sp|Q5R7P4|BGAL_PONAB	0.940681	0.172158	Not Interesting
25648	g10650	sp|Q7LL04|YQK1_SCHPO	0.961365	1.07095	Not Interesting
25673	g10655	NA	-0.378379	-0.195904	Not Interesting
25725	g10680	sp|H2A0N9|KCP4_PINMG	1.05373	0.758923	Not Interesting
25726	g10680	sp|H2A0N9|KCP4_PINMG	0.746786	0.597726	Not Interesting
25727	g10680	sp|H2A0N9|KCP4_PINMG	0.957759	0.833665	Not Interesting
25728	g10680	sp|H2A0N9|KCP4_PINMG	1.34163	0.731217	Not Interesting
25748	g4990	NA	-1.67943	-1.37771	Not Interesting
25797	g3383	sp|Q9JL18|BACE2_MOUSE	-0.356404	-0.24727	Not Interesting
25833	g2666	sp|P21677|TFE2_RAT	-0.384927	-0.366884	Not Interesting
25857	g33566	sp|P41743|KPCI_HUMAN	1.23115	1.27789	Not Interesting
25881	g33575	NA	0.966371	0.775735	Not Interesting
25884	g33575	NA	0.811838	0.657566	Not Interesting
25899	g33581	NA	3.85351	3.75768	Not Interesting
25900	g33581	NA	1.04037	1.10282	Not Interesting
25901	g33581	NA	0.354756	0.372694	Not Interesting
25907	g33582	NA	-0.658372	-0.973255	Not Interesting
2591	g7646	NA	-0.576536	-0.846774	Not Interesting
2593	g7646	NA	-0.578646	-0.473852	Not Interesting
25976	g7804	NA	-1.41082	-1.58338	Not Interesting
25985	g7808	NA	-1.39123	-1.12951	Not Interesting
25988	g7810	sp|Q9I830|KCNA2_ONCMY	-0.690257	-0.650645	Not Interesting
25993	g7812	NA	-0.458383	-0.673996	Not Interesting
25994	g7810	sp|Q9I830|KCNA2_ONCMY	-0.585381	-0.591604	Not Interesting
2600	g7646	NA	-0.565668	-0.934583	Not Interesting
26014	g7817	sp|Q09081|KCNA2_RABIT	-0.449254	-0.308489	Not Interesting
26038	g7820	sp|Q8CHL0|FZD5_RAT	-0.522533	-0.452577	Not Interesting
26055	g7827	sp|Q95SX7|RTBS_DROME	-1.50571	-1.20463	Not Interesting
26066	g7832	sp|O95267|GRP1_HUMAN	0.632007	0.3821	Not Interesting
26067	g7832	sp|O95267|GRP1_HUMAN	0.976886	1.08261	Not Interesting
26068	g7832	sp|O95267|GRP1_HUMAN	0.625421	0.747192	Not Interesting
26074	g7835	NA	0.428122	0.209593	Not Interesting
26078	g7838	NA	-0.531787	-0.835975	Not Interesting
26079	g7838	NA	0.787145	0.644837	Not Interesting
26086	g7838	NA	0.647376	0.646411	Not Interesting
2613	g7650	NA	1.05603	0.572734	Not Interesting
26135	g22859	sp|B2RX14|TUT4_MOUSE	-1.14578	-0.786836	Not Interesting
26161	g22869	NA	-1.16929	-0.953661	Not Interesting
26208	g22879	sp|Q8WWF8|CAPSL_HUMAN	0.798708	0.867522	Not Interesting
2622	g7652	sp|Q52KG5|KI26A_MOUSE	-0.499723	-0.242825	Not Interesting
2623	g7652	sp|Q52KG5|KI26A_MOUSE	-0.833914	-0.982079	Not Interesting
2626	g7652	sp|Q52KG5|KI26A_MOUSE	-0.712107	-0.442478	Not Interesting
26288	g9270	sp|A9UZ24|BCAT_MONBE	-0.923656	-0.379809	Not Interesting
26330	g11659	sp|Q9NQG7|HPS4_HUMAN	-0.825768	-0.404154	Not Interesting
26355	g11669	sp|A6QLC7|TPC11_BOVIN	-1.18733	-1.24885	Not Interesting
26368	g11670	sp|Q4FAT7|BGLR_PIG	-1.66522	-1.59673	Not Interesting
26386	g11692	sp|Q9JJC6|RIPL1_MOUSE	0.467746	0.350927	Not Interesting
26387	g11693	sp|Q9M0A7|GGP1_ARATH	0.442987	0.585877	Not Interesting
26388	g11694	sp|P39921|TPM1_HYDVU	1.07486	1.0996	Not Interesting
26393	g11696	sp|P39921|TPM1_HYDVU	-0.500528	-0.506628	Not Interesting
26394	g11696	sp|P39921|TPM1_HYDVU	-0.945091	-0.736597	Not Interesting
26395	g11697	sp|P55112|NAS4_CAEEL	0.63438	0.533255	Not Interesting
26407	g11698	sp|P55112|NAS4_CAEEL	1.56341	1.52794	Not Interesting
26464	g25248	sp|Q8UWA5|CAH2_TRIHK	-0.854664	-0.931921	Not Interesting
26499	g25257	NA	-0.800042	-0.590219	Not Interesting
26506	g25259	sp|Q9VCA2|ORCT_DROME	-0.390539	-0.456294	Not Interesting
26523	g17028	NA	-0.569783	-0.449574	Not Interesting
26541	g16603	NA	-0.887832	-0.782374	Not Interesting
26542	g16603	NA	-1.11885	-0.613744	Not Interesting
26602	g16628	sp|P54846|NRL_MOUSE	1.00123	1.01304	Not Interesting
26661	NA	NA	-1.37042	-1.31982	Not Interesting
2667	g6719	sp|Q91ZH7|ABHD3_MOUSE	0.865126	0.557579	Not Interesting
26736	g23757	NA	0.0836442	0.652023	Not Interesting
26796	g26083	sp|P51399|LOX5_MESAU	0.776794	0.475539	Not Interesting
26852	g16274	sp|P61244|MAX_HUMAN	0.745975	0.466752	Not Interesting
26900	g16288	sp|Q28H35|DAND5_XENTR	-0.758535	-0.467255	Not Interesting
26901	g16288	sp|Q28H35|DAND5_XENTR	-1.6794	-1.48811	Not Interesting
26911	g16296	NA	-1.3018	-1.12403	Not Interesting
26921	g16299	sp|Q9QWG7|ST1B1_MOUSE	-1.1729	-1.43027	Not Interesting
26932	g16302	NA	-0.59955	-0.616296	Not Interesting
2695	g6724	NA	0.913845	0.694834	Not Interesting
26952	g28507	sp|A2AJ76|HMCN2_MOUSE	-0.431579	-0.527079	Not Interesting
26953	g28507	sp|A2AJ76|HMCN2_MOUSE	-0.47195	-0.356415	Not Interesting
26956	g28507	sp|A2AJ76|HMCN2_MOUSE	-0.616103	-0.749385	Not Interesting
26966	g28511	NA	-1.20478	-0.832077	Not Interesting
26971	g28512	NA	-0.617638	-0.510271	Not Interesting
27009	g12685	sp|Q3U481|MFS12_MOUSE	1.00672	0.893997	Not Interesting
27011	g12685	sp|Q3U481|MFS12_MOUSE	-1.0215	-0.91767	Not Interesting
27013	g12685	sp|Q3U481|MFS12_MOUSE	-1.03238	-1.03513	Not Interesting
27117	g9425	sp|P48547|KCNC1_HUMAN	2.46199	1.78691	Not Interesting
27120	g9425	sp|P48547|KCNC1_HUMAN	0.78623	0.572609	Not Interesting
27128	g9430	NA	0.763728	0.506727	Not Interesting
2715	g6732	sp|Q54KA7|SECG_DICDI	-0.941415	-0.754598	Not Interesting
27288	g2880	NA	1.12981	1.90986	Not Interesting
27289	g2880	NA	-1.60105	-1.37674	Not Interesting
27326	g18860	NA	-0.715634	-0.500896	Not Interesting
27339	g21336	NA	-0.265333	-0.540946	Not Interesting
2734	g6740	NA	-0.363016	-0.501072	Not Interesting
27361	g1957	sp|Q8C1R0|TSSK5_MOUSE	0.697414	0.521103	Not Interesting
27392	g1967	sp|Q2TA16|CCD65_BOVIN	-1.68757	-1.37059	Not Interesting
27404	g1969	NA	1.6629	1.15231	Not Interesting
27406	g1970	sp|Q9I9E0|TAOK3_CHICK	0.849586	0.538911	Not Interesting
27421	g1972	NA	-0.855319	-0.496349	Not Interesting
27426	g1972	NA	0.674907	0.488834	Not Interesting
27507	g25842	NA	0.13091	0.557643	Not Interesting
27549	g2068	NA	0.162062	0.350766	Not Interesting
27550	g2069	NA	0.662622	0.905336	Not Interesting
27551	g2069	NA	1.22398	1.24862	Not Interesting
27588	g28775	sp|P34457|YMD3_CAEEL	-0.665136	-0.0381002	Not Interesting
27647	g28474	sp|Q8VZH2|APM1_ARATH	-0.692657	-0.564854	Not Interesting
27672	g28482	sp|Q8BW72|KDM4A_MOUSE	0.546014	0.34342	Not Interesting
2770	g6754	NA	1.22309	0.610416	Not Interesting
27739	NA	NA	0.565242	0.698868	Not Interesting
27783	g7936	sp|Q91175|ADA1A_ORYLA	-0.580996	-0.571356	Not Interesting
27784	g7936	sp|Q91175|ADA1A_ORYLA	-0.553627	-0.119431	Not Interesting
27791	g7938	sp|Q7RTX9|MOT14_HUMAN	-0.719926	-0.563738	Not Interesting
27792	g7938	sp|Q7RTX9|MOT14_HUMAN	-0.903678	-0.549405	Not Interesting
27793	g7938	sp|Q7RTX9|MOT14_HUMAN	-0.569446	-0.688299	Not Interesting
27862	g23133	NA	0.620465	0.521995	Not Interesting
27873	g23134	sp|Q52KK3|S2551_RAT	-0.385768	-0.323046	Not Interesting
27896	g23140	sp|Q02218|ODO1_HUMAN	0.662475	0.158418	Not Interesting
27920	g23153	sp|P92208|JNK_DROME	-0.610591	-0.763219	Not Interesting
27956	g11467	NA	-0.478966	-0.580362	Not Interesting
27960	g11467	NA	0.362016	0.622213	Not Interesting
27966	g11470	sp|Q96LW9|ZSC31_HUMAN	1.77246	1.51825	Not Interesting
27967	g11470	sp|Q96LW9|ZSC31_HUMAN	0.869135	0.612334	Not Interesting
27970	g11470	sp|Q96LW9|ZSC31_HUMAN	0.55022	0.449931	Not Interesting
27971	g11470	sp|Q96LW9|ZSC31_HUMAN	1.15911	0.208647	Not Interesting
27979	g11471	sp|P24044|CALM_PLAFA	0.577018	0.395011	Not Interesting
2800	g6758	sp|Q91EK3|REP_GOCV	0.719678	0.565669	Not Interesting
28128	g16313	NA	-0.642237	-0.450541	Not Interesting
28147	g24556	sp|P54644|KRAC_DICDI	-0.603615	-0.484035	Not Interesting
28162	g24560	sp|Q9UKN7|MYO15_HUMAN	-0.933495	-0.391399	Not Interesting
28221	g32429	sp|Q07139|ECT2_MOUSE	0.421439	0.0891102	Not Interesting
28256	g32443	NA	0.778873	0.679919	Not Interesting
28257	g32443	NA	1.6245	1.77724	Not Interesting
28348	g21617	NA	1.04147	0.6418	Not Interesting
28365	g21617	NA	-0.486898	-0.953331	Not Interesting
28406	g21622	NA	-0.563972	-0.585473	Not Interesting
28407	g21622	NA	-0.59381	-0.472326	Not Interesting
28426	g4694	NA	0.603973	0.430096	Not Interesting
28432	g4694	NA	-1.04179	-0.843471	Not Interesting
28436	g4694	NA	-0.873214	-1.10158	Not Interesting
28517	g29670	sp|Q95M18|ENPL_BOVIN	1.14638	1.18405	Not Interesting
2852	g6825	sp|Q9H0J4|QRIC2_HUMAN	1.11094	1.05305	Not Interesting
28533	g22086	sp|Q5XGS8|GTPB1_XENLA	2.57512	1.60223	Not Interesting
28540	g22088	sp|D2XV59|GTPB1_RAT	2.96696	2.35287	Not Interesting
28542	g22088	sp|D2XV59|GTPB1_RAT	2.7854	1.90373	Not Interesting
28543	g22088	sp|D2XV59|GTPB1_RAT	2.96025	2.32319	Not Interesting
28544	g22088	sp|D2XV59|GTPB1_RAT	2.53678	2.2887	Not Interesting
28549	g22088	sp|D2XV59|GTPB1_RAT	1.23643	0.605665	Not Interesting
28568	g28100	sp|Q95SX7|RTBS_DROME	0.67923	0.320155	Not Interesting
28623	g28118	NA	-1.04086	-0.783542	Not Interesting
28666	g11021	sp|O76075|DFFB_HUMAN	0.633184	0.71769	Not Interesting
2867	g6835	sp|A0JMP0|ATHL1_DANRE	-0.853445	-0.737364	Not Interesting
28670	g11022	sp|Q9H6U8|ALG9_HUMAN	0.47846	0.670034	Not Interesting
28671	g11022	sp|Q9H6U8|ALG9_HUMAN	0.582038	0.761818	Not Interesting
28699	g11029	NA	-0.606931	-0.630809	Not Interesting
28700	g11030	NA	-1.03759	-1.43171	Not Interesting
28708	g11032	NA	-0.752648	-0.982777	Not Interesting
28718	g11035	NA	0.919834	0.783582	Not Interesting
28778	NA	NA	0.718241	1.50569	Not Interesting
28790	g29167	sp|A0JMY5|NFXL1_XENLA	-0.680929	-0.698864	Not Interesting
28854	g29182	sp|Q9Z1T5|DEAF1_MOUSE	-1.33144	-0.888757	Not Interesting
28855	g29182	sp|Q9Z1T5|DEAF1_MOUSE	-0.908291	-0.476791	Not Interesting
2886	g6840	sp|Q05944|HSP70_HYDVU	1.76727	1.50102	Not Interesting
2887	g6840	sp|Q05944|HSP70_HYDVU	1.23807	0.751958	Not Interesting
28876	g29199	NA	0.931302	0.663382	Not Interesting
28903	g23249	NA	0.306865	0.420649	Not Interesting
28907	g23249	NA	-0.812517	-0.65266	Not Interesting
28924	g23256	sp|Q8BH31|MFSD8_MOUSE	-0.612504	-0.443486	Not Interesting
28926	g23256	sp|Q8BH31|MFSD8_MOUSE	1.52564	1.12477	Not Interesting
28929	g23256	sp|Q8BH31|MFSD8_MOUSE	-0.599946	-0.550724	Not Interesting
28954	g23268	sp|O94827|PKHG5_HUMAN	-0.912279	-0.893151	Not Interesting
29006	g23281	sp|A7T0W1|UXT_NEMVE	-0.833934	-0.463293	Not Interesting
29017	g23284	sp|P54288|CACB2_RABIT	1.05231	0.691039	Not Interesting
29024	g23287	NA	1.41065	1.10605	Not Interesting
29033	g23289	NA	0.884174	0.489714	Not Interesting
29069	g23296	sp|Q64317|DLX1_MOUSE	-0.569835	-0.442423	Not Interesting
2908	g6847	sp|P20673|ARLY_RAT	-1.48058	-1.46601	Not Interesting
29087	NA	NA	1.11869	1.9299	Not Interesting
29106	g9033	NA	-0.906169	-0.782709	Not Interesting
2911	g6848	NA	-1.06658	-1.21446	Not Interesting
29115	g25700	NA	0.827844	0.278422	Not Interesting
29125	g28537	NA	-0.625805	-0.721808	Not Interesting
29193	g28594	sp|Q9Z2I4|ROBO3_MOUSE	0.649366	0.76438	Not Interesting
29216	g28605	NA	-0.899549	-0.803712	Not Interesting
29221	g28606	sp|Q06507|ATF4_MOUSE	0.546664	0.292551	Not Interesting
29223	g28606	sp|Q06507|ATF4_MOUSE	-0.521035	-0.468341	Not Interesting
29235	g28608	sp|Q7Z2H8|S36A1_HUMAN	0.496986	0.399943	Not Interesting
29267	g28615	sp|Q0V8S0|HGS_BOVIN	1.74652	1.57678	Not Interesting
29272	g28616	sp|Q80VP0|TCPR1_MOUSE	1.95085	1.54926	Not Interesting
29276	g28616	sp|Q80VP0|TCPR1_MOUSE	0.956332	0.84296	Not Interesting
293	g18948	sp|Q6AVI0|RSLE2_ORYSJ	0.478061	0.442627	Not Interesting
29345	g28640	sp|Q9ULT8|HECD1_HUMAN	0.246853	0.511019	Not Interesting
2938	g32638	sp|Q98925|IRF2_CHICK	-0.631883	-0.508841	Not Interesting
29473	g28682	sp|Q95NR9|CALM_METSE	-0.812942	-0.720661	Not Interesting
29486	g28684	sp|Q9MZT7|MYC_TADBR	0.616565	0.55728	Not Interesting
29521	g28700	sp|Q9NXK6|MPRG_HUMAN	-0.869097	-1.10357	Not Interesting
29522	g28700	sp|Q9NXK6|MPRG_HUMAN	-0.899261	-0.795653	Not Interesting
29523	g28700	sp|Q9NXK6|MPRG_HUMAN	-1.30336	-0.931352	Not Interesting
29556	g21447	sp|P55344|LMIP_HUMAN	-0.600307	-0.836548	Not Interesting
29597	g19241	sp|Q80WQ9|ZBED4_MOUSE	0.961204	0.318071	Not Interesting
296	g18947	sp|Q8NB14|UBP38_HUMAN	1.66581	1.65005	Not Interesting
29638	g15629	sp|P18519|TNR16_CHICK	1.18572	1.10688	Not Interesting
2964	g32652	NA	-0.535403	-0.736562	Not Interesting
29642	g15629	sp|P18519|TNR16_CHICK	0.243186	0.597848	Not Interesting
29652	g15630	sp|H2A0N9|KCP4_PINMG	0.76322	0.608222	Not Interesting
29655	g15630	sp|H2A0N9|KCP4_PINMG	3.48101	2.67228	Not Interesting
29656	g15630	sp|H2A0N9|KCP4_PINMG	1.69202	0.970782	Not Interesting
29657	g15630	sp|H2A0N9|KCP4_PINMG	0.696638	0.541787	Not Interesting
29659	g15631	sp|P0CJ14|VP302_LYCMC	-0.46718	-0.680368	Not Interesting
29660	g15631	sp|P0CJ14|VP302_LYCMC	-0.521208	-0.56125	Not Interesting
29663	g15632	sp|P0CJ14|VP302_LYCMC	-0.252101	-0.627346	Not Interesting
29679	g15635	NA	0.890083	0.756519	Not Interesting
29722	g3467	NA	-0.831412	-0.715031	Not Interesting
29725	g3468	NA	-1.15953	-0.998351	Not Interesting
29735	g3473	sp|O15127|SCAM2_HUMAN	1.79831	1.26108	Not Interesting
29754	g3486	sp|Q13231|CHIT1_HUMAN	0.613211	0.399215	Not Interesting
29808	g3515	sp|A7S3I2|BBIP1_NEMVE	-0.963608	-0.919002	Not Interesting
29815	g3517	NA	0.668159	0.832995	Not Interesting
29820	g3518	sp|Q7T3Q7|OPSO_RUTRU	-0.691889	-0.587819	Not Interesting
29842	g3525	NA	-1.81685	-1.8018	Not Interesting
29852	g3528	sp|Q25189|GBLP_HYDVU	-0.868851	-0.770539	Not Interesting
29869	g3530	sp|P30825|CTR1_HUMAN	0.675305	0.503212	Not Interesting
29879	g3534	sp|Q5XIH9|HPDL_RAT	-1.24688	-0.79519	Not Interesting
29880	g3534	sp|Q5XIH9|HPDL_RAT	-0.762827	-0.580739	Not Interesting
29881	g3534	sp|Q5XIH9|HPDL_RAT	-1.30814	-1.38619	Not Interesting
29883	g3535	sp|Q32LE3|CETN1_BOVIN	-0.58024	-0.436062	Not Interesting
29931	g3549	NA	0.92702	2.09524	Not Interesting
29954	g3553	sp|A0LMC1|PHNX_SYNFM	0.56933	0.956071	Not Interesting
29955	g3553	sp|A0LMC1|PHNX_SYNFM	0.173317	0.367128	Not Interesting
29980	g3561	NA	-0.569537	-0.505074	Not Interesting
29982	g3561	NA	-0.512759	-0.396767	Not Interesting
29986	g3562	NA	0.575485	0.538017	Not Interesting
30024	g3568	sp|O35490|BHMT1_MOUSE	-1.87512	-1.51441	Not Interesting
30040	g28088	NA	-0.732358	-0.668138	Not Interesting
30118	g19358	NA	-1.10197	-0.857051	Not Interesting
30144	g19367	NA	0.466554	0.572079	Not Interesting
30150	g19367	NA	0.740306	0.799816	Not Interesting
30165	g19369	sp|Q28007|DPYD_BOVIN	-0.763164	-0.431369	Not Interesting
30196	g33259	sp|Q94BZ1|ZIFL1_ARATH	0.459419	0.59206	Not Interesting
302	g18951	sp|P38571|LICH_HUMAN	0.391608	0.415984	Not Interesting
30220	g33267	sp|Q6DIV6|VIAAT_XENTR	0.385549	0.286939	Not Interesting
30238	g33270	sp|Q13367|AP3B2_HUMAN	-1.08098	-1.18819	Not Interesting
30266	g33275	sp|Q8VCK5|KLH20_MOUSE	1.13673	0.774819	Not Interesting
30272	g33276	sp|Q86U44|MTA70_HUMAN	0.680601	0.56625	Not Interesting
30275	g33276	sp|Q86U44|MTA70_HUMAN	-0.600249	-0.633211	Not Interesting
30301	g33286	sp|Q28GU6|ARP19_XENTR	-0.491468	-0.578835	Not Interesting
30315	g33299	NA	-0.809156	-0.931985	Not Interesting
30350	g16590	NA	-1.24663	-0.99227	Not Interesting
30355	g16598	NA	-0.81646	-1.30138	Not Interesting
30392	g26850	NA	0.433142	0.58114	Not Interesting
30422	g31828	NA	-0.626226	-0.452598	Not Interesting
30451	g32665	sp|Q9VFK6|KMT5A_DROME	0.257125	0.337838	Not Interesting
30453	g32665	sp|Q9VFK6|KMT5A_DROME	0.628214	0.565969	Not Interesting
30523	g2028	NA	0.526293	0.390631	Not Interesting
30524	g2028	NA	2.18715	1.79383	Not Interesting
30537	g2033	NA	-0.98278	-0.894419	Not Interesting
30562	g2038	sp|P35400|GRM7_RAT	-0.763512	-0.488116	Not Interesting
30563	g2038	sp|P35400|GRM7_RAT	-0.701174	-0.568067	Not Interesting
30565	g2038	sp|P35400|GRM7_RAT	-0.650608	-0.854564	Not Interesting
30580	g2041	sp|Q93127|GPR18_AMPAM	-0.990025	-0.691432	Not Interesting
306	g18951	sp|P38571|LICH_HUMAN	1.64026	1.44823	Not Interesting
30626	g25312	NA	0.974436	0.894361	Not Interesting
30630	g25316	NA	1.1631	0.880509	Not Interesting
30640	g25320	sp|Q9WVC0|SEPT7_RAT	-0.628395	-0.477808	Not Interesting
30657	g25321	NA	1.09499	0.662841	Not Interesting
30661	g25322	sp|O60290|ZN862_HUMAN	1.39696	1.68458	Not Interesting
30700	g26569	sp|Q96UM2|LAC3_BOTFU	1.27483	1.03594	Not Interesting
30713	g26572	sp|Q2QUN2|LAC24_ORYSJ	-1.51419	-0.867873	Not Interesting
30716	g26572	sp|Q2QUN2|LAC24_ORYSJ	0.674631	0.842873	Not Interesting
30723	g26574	NA	-0.470606	-0.348045	Not Interesting
30725	g26574	NA	0.849943	0.729516	Not Interesting
30743	g26583	sp|Q68CZ2|TENS3_HUMAN	-0.595909	-0.505921	Not Interesting
30744	g26583	sp|Q68CZ2|TENS3_HUMAN	0.705619	0.557209	Not Interesting
30751	g26583	sp|Q68CZ2|TENS3_HUMAN	-0.627291	-0.584756	Not Interesting
30809	g23162	NA	-1.01942	-0.609749	Not Interesting
30860	g8644	NA	-1.08837	-0.74707	Not Interesting
30881	g8647	sp|Q14767|LTBP2_HUMAN	-0.924969	-0.642976	Not Interesting
30902	g8658	sp|A2ASQ1|AGRIN_MOUSE	-1.03905	-0.574662	Not Interesting
3098	g8736	sp|O95905|ECD_HUMAN	-0.508994	-0.546337	Not Interesting
30987	g3875	sp|A3DEX6|RSGI5_CLOTH	0.871077	0.578268	Not Interesting
30996	g3879	NA	0.670348	0.612281	Not Interesting
31003	g3892	sp|P80404|GABT_HUMAN	0.793467	0.576555	Not Interesting
31006	g3893	sp|Q8GXG1|ASPGB_ARATH	1.27116	0.605296	Not Interesting
31009	g3894	sp|P94252|YHIT_BORBU	0.423864	0.395965	Not Interesting
31011	g3894	sp|P94252|YHIT_BORBU	0.553077	0.463451	Not Interesting
31043	g3921	sp|Q8BTM8|FLNA_MOUSE	-0.571225	-0.460677	Not Interesting
31051	g3921	sp|Q8BTM8|FLNA_MOUSE	0.768036	0.504401	Not Interesting
31053	g3921	sp|Q8BTM8|FLNA_MOUSE	-0.656904	-0.567361	Not Interesting
31060	g3921	sp|Q8BTM8|FLNA_MOUSE	-1.01735	-0.865796	Not Interesting
31076	g3924	sp|O88382|MAGI2_RAT	-0.502589	-0.888821	Not Interesting
31106	g3930	sp|Q9NU19|TB22B_HUMAN	0.430846	0.456981	Not Interesting
31128	g3945	NA	0.552054	0.468115	Not Interesting
31129	g3945	NA	1.24703	0.336318	Not Interesting
31131	g3945	NA	-0.530438	-0.342241	Not Interesting
31142	g3948	sp|Q9KDS9|ACCC_BACHD	0.53731	0.680214	Not Interesting
31145	g3948	sp|Q9KDS9|ACCC_BACHD	0.874431	0.996882	Not Interesting
31176	g9836	NA	0.660608	0.441284	Not Interesting
31216	g13188	NA	-1.02937	-1.09546	Not Interesting
31225	g13190	sp|Q8MIZ3|DCPS_PIG	-0.71233	-0.426872	Not Interesting
31260	g13195	NA	-0.636363	-0.486	Not Interesting
31389	g28881	NA	-0.425459	-0.359573	Not Interesting
31394	g28887	sp|A6QPH9|ZMYM5_BOVIN	0.709481	0.641007	Not Interesting
31428	g13272	sp|P18729|ZG57_XENLA	0.666878	0.66479	Not Interesting
31433	g13275	NA	0.58893	0.542874	Not Interesting
31478	g17707	sp|Q5R4D4|NP1L1_PONAB	0.333623	0.384533	Not Interesting
3153	g27049	NA	-0.588784	-0.614763	Not Interesting
31533	g17742	sp|Q5IS41|NCAN_PANTR	-0.610434	-0.50061	Not Interesting
31535	g17742	sp|Q5IS41|NCAN_PANTR	0.617999	0.28998	Not Interesting
31538	g17742	sp|Q5IS41|NCAN_PANTR	2.14136	1.57882	Not Interesting
31570	g17754	sp|Q7Z2H8|S36A1_HUMAN	-1.25748	-1.25629	Not Interesting
31603	g23079	NA	0.822762	0.560669	Not Interesting
31604	g23079	NA	1.08563	0.775233	Not Interesting
31607	g23079	NA	2.48465	1.90569	Not Interesting
31611	g23080	sp|Q5U3Q6|CIP4_DANRE	0.81139	0.350971	Not Interesting
31621	g23080	sp|Q5U3Q6|CIP4_DANRE	-1.4339	-1.12643	Not Interesting
31647	g23103	NA	-0.93027	-0.826351	Not Interesting
31648	g23103	NA	-0.521788	0.0553829	Not Interesting
31662	g23109	NA	1.11655	1.10757	Not Interesting
31693	g23119	sp|Q6P7A9|LYAG_RAT	-1.31426	-1.13951	Not Interesting
31705	g25303	NA	-0.846968	-0.812956	Not Interesting
31807	g28054	NA	-2.40706	-2.22506	Not Interesting
31823	g19879	NA	0.347618	0.472434	Not Interesting
31855	g3811	sp|P07584|ASTA_ASTAS	0.898359	0.700876	Not Interesting
31869	g3813	sp|P55115|NAS15_CAEEL	0.72677	0.575709	Not Interesting
3190	g27063	sp|Q91XD6|VPS36_MOUSE	-0.679989	-0.597878	Not Interesting
31944	g26585	sp|Q7PMT1|EXD_ANOGA	-0.882993	-0.663646	Not Interesting
31950	g26586	NA	-0.83205	-0.688292	Not Interesting
31988	g1320	sp|Q8K007|SULF1_MOUSE	-0.951512	-0.477107	Not Interesting
320	g18954	sp|A8WIP6|CDK20_DANRE	-0.684382	-0.617342	Not Interesting
3203	g20035	NA	0.629069	0.556986	Not Interesting
32031	g1340	NA	0.392937	0.339936	Not Interesting
32038	g1347	NA	0.376096	0.462318	Not Interesting
3204	g20035	NA	-0.980669	-0.903989	Not Interesting
32069	NA	NA	-0.889628	-0.888757	Not Interesting
3207	g20037	NA	1.45265	1.11523	Not Interesting
3209	g20037	NA	1.08689	1.0795	Not Interesting
3211	g20037	NA	0.960074	1.1088	Not Interesting
3212	g20037	NA	2.37973	2.04944	Not Interesting
3213	g20037	NA	0.926307	0.654125	Not Interesting
3214	g20038	NA	2.6854	2.26175	Not Interesting
3217	g20038	NA	0.606563	0.489858	Not Interesting
32175	g14614	sp|O35841|API5_MOUSE	-0.905819	-0.636826	Not Interesting
32205	g15950	NA	1.42639	0.756163	Not Interesting
32224	NA	NA	-1.07432	-0.769237	Not Interesting
32225	NA	NA	-0.735344	-1.23036	Not Interesting
32246	g29544	sp|O14656|TOR1A_HUMAN	-0.634409	-0.423767	Not Interesting
32280	g29567	sp|Q9VUL9|FUCTA_DROME	1.37648	1.23954	Not Interesting
32283	g29567	sp|Q9VUL9|FUCTA_DROME	2.00333	1.42179	Not Interesting
32332	g29577	NA	0.69845	0.48806	Not Interesting
32335	g29578	sp|P50538|MAD1_MOUSE	0.270667	0.553197	Not Interesting
32337	g29578	sp|P50538|MAD1_MOUSE	-1.08048	-0.993073	Not Interesting
3239	g20042	sp|Q66IY8|I2BLA_XENLA	-0.322697	-0.483037	Not Interesting
32428	g29057	NA	1.04088	1.10214	Not Interesting
3243	g20042	sp|Q66IY8|I2BLA_XENLA	-0.795782	-0.547774	Not Interesting
3249	g20043	NA	0.836661	1.03961	Not Interesting
32521	g8157	sp|Q64213|SF01_MOUSE	-0.438979	-0.354604	Not Interesting
3260	g20045	NA	0.638518	0.542194	Not Interesting
32637	g17403	NA	-0.647415	-0.748432	Not Interesting
3266	g20048	NA	-1.32641	-1.22798	Not Interesting
32662	g17408	NA	0.568549	-0.0175797	Not Interesting
32685	g32883	NA	-0.589303	-0.5978	Not Interesting
3269	g20050	sp|O41033|DUT_PBCV1	-1.23133	-1.56285	Not Interesting
32693	g32884	NA	-0.487081	-0.687151	Not Interesting
3270	g20051	NA	-1.47686	-1.41423	Not Interesting
32704	g32886	NA	-0.555657	-0.723566	Not Interesting
32710	g32887	NA	-1.28389	-0.865973	Not Interesting
32715	g32887	NA	-0.33129	-0.756355	Not Interesting
32720	g32887	NA	-0.751486	-0.470637	Not Interesting
32785	g17479	sp|Q3UHD1|BAI1_MOUSE	-1.12612	-1.09808	Not Interesting
32790	g17479	sp|Q3UHD1|BAI1_MOUSE	-1.07088	-1.01979	Not Interesting
32791	g17479	sp|Q3UHD1|BAI1_MOUSE	-0.864004	-0.735878	Not Interesting
32831	g17491	sp|E2JA28|DDAC_ENTAG	-0.61698	-0.569306	Not Interesting
32855	g17500	sp|Q9BXF3|CECR2_HUMAN	-0.365408	-0.344848	Not Interesting
32884	g17506	sp|P54707|AT12A_HUMAN	0.683286	0.5863	Not Interesting
32981	g2660	sp|Q6MG82|PRRT1_RAT	0.860598	0.842912	Not Interesting
32992	g2661	sp|Q60467|CO5A1_CRILO	-0.929526	-1.03396	Not Interesting
33023	g21056	sp|Q29RV1|PDIA4_BOVIN	1.14432	0.940328	Not Interesting
33069	g18085	sp|Q9DGD1|MGT4C_CHICK	1.88428	1.1781	Not Interesting
33113	g18096	NA	0.633896	0.536325	Not Interesting
33116	g18097	sp|Q8C0T5|SI1L1_MOUSE	0.652211	0.666592	Not Interesting
33139	g18101	NA	0.889448	0.712621	Not Interesting
33148	g18102	NA	0.715114	1.27644	Not Interesting
33195	g18123	sp|P29318|EPHA3_CHICK	0.501123	0.403408	Not Interesting
33217	g18127	NA	0.499108	0.443415	Not Interesting
33220	g18131	NA	-0.434427	-0.635683	Not Interesting
33242	g18155	sp|Q4VAC9|PKHG3_MOUSE	-0.651336	-0.852996	Not Interesting
33343	g18184	NA	-0.619156	-0.572756	Not Interesting
33348	g18188	NA	-0.644126	-0.731196	Not Interesting
33364	g18192	sp|Q8BND5|QSOX1_MOUSE	0.855028	0.537372	Not Interesting
33378	g18195	NA	1.17241	0.936267	Not Interesting
33387	g18199	sp|Q5SFM8|RBM27_MOUSE	0.604622	0.581348	Not Interesting
33388	g18200	sp|Q99578|RIT2_HUMAN	0.330683	0.794068	Not Interesting
33393	g18200	sp|Q99578|RIT2_HUMAN	1.90378	1.6224	Not Interesting
33407	g33373	sp|P56706|WNT7B_HUMAN	1.76347	0.987341	Not Interesting
33408	g33373	sp|P56706|WNT7B_HUMAN	0.846602	0.520198	Not Interesting
33439	g33377	sp|Q8LA13|RH11_ARATH	-1.00848	-0.804838	Not Interesting
33442	g33377	sp|Q8LA13|RH11_ARATH	-2.43266	-2.29882	Not Interesting
33443	g33377	sp|Q8LA13|RH11_ARATH	-0.870096	-0.550264	Not Interesting
33448	g33380	sp|B5XBI1|IF43A_SALSA	0.659394	0.690089	Not Interesting
33474	g33393	NA	0.742799	0.374538	Not Interesting
33483	g33394	sp|Q91W89|MA2C1_MOUSE	-1.04514	-1.00145	Not Interesting
33484	g33394	sp|Q91W89|MA2C1_MOUSE	-0.934099	-0.816268	Not Interesting
33485	g33394	sp|Q91W89|MA2C1_MOUSE	-0.815631	-0.808194	Not Interesting
33495	g33396	sp|Q28EM7|OTX5_XENTR	-0.676752	-0.792954	Not Interesting
33497	g33396	sp|Q28EM7|OTX5_XENTR	-0.443452	-0.654945	Not Interesting
33498	g33396	sp|Q28EM7|OTX5_XENTR	-0.79257	-0.865313	Not Interesting
33530	g33401	NA	-0.636396	-0.363461	Not Interesting
33539	g33404	NA	-0.678757	-1.50355	Not Interesting
33550	g33404	NA	-0.494529	-0.581727	Not Interesting
33559	g33408	NA	0.42444	0.783018	Not Interesting
33560	g33409	NA	0.426669	0.525387	Not Interesting
33564	g33412	NA	0.428405	0.586542	Not Interesting
33587	g33422	sp|Q62445|SP4_MOUSE	0.650088	0.645918	Not Interesting
33588	g33422	sp|Q62445|SP4_MOUSE	0.51844	0.45065	Not Interesting
33605	g33430	sp|P13832|MRLCA_RAT	-0.658579	-0.793143	Not Interesting
33614	g33432	NA	0.594845	0.651858	Not Interesting
33660	g33444	NA	-0.746271	-0.533229	Not Interesting
33663	g33444	NA	-1.73129	-1.76157	Not Interesting
33674	g33445	sp|Q28824|MYLK_BOVIN	0.535227	0.827317	Not Interesting
33693	g33449	NA	0.970702	0.595513	Not Interesting
33695	g33449	NA	0.858917	0.762463	Not Interesting
33759	g33464	NA	-0.903094	-1.0333	Not Interesting
33767	g33464	NA	-0.72904	-0.456935	Not Interesting
33768	g33464	NA	-0.491559	-0.650581	Not Interesting
33811	g17574	sp|C9D7C2|CAC1A_APIME	-0.439161	-0.61509	Not Interesting
33830	g17581	sp|P56698|CAC1B_DIPOM	-1.21715	-1.11308	Not Interesting
3388	g23514	sp|P83852|CBPD_LOPSP	0.337845	0.26325	Not Interesting
33884	g19963	sp|P40122|CAP_HYDVD	-0.710466	-0.589882	Not Interesting
33886	g19963	sp|P40122|CAP_HYDVD	-0.310957	-0.514395	Not Interesting
33913	g19974	NA	-0.81865	-0.472277	Not Interesting
33914	g19974	NA	-0.563838	-0.735833	Not Interesting
33925	g10190	sp|Q95107|WASL_BOVIN	0.788313	0.854093	Not Interesting
33970	g26784	sp|C9D7R3|VMPA3_LOXIN	1.20115	0.752855	Not Interesting
33971	g26784	sp|C9D7R3|VMPA3_LOXIN	1.14261	1.07329	Not Interesting
33972	g26784	sp|C9D7R3|VMPA3_LOXIN	1.04554	0.705304	Not Interesting
33979	g26788	sp|P63079|GBRB3_RAT	-0.672224	-0.482248	Not Interesting
34004	g26795	sp|Q03326|OXIR_STRAT	-1.00119	-0.662011	Not Interesting
34026	g26798	sp|P35320|OXIR_STRLI	0.649889	0.471035	Not Interesting
34027	g26798	sp|P35320|OXIR_STRLI	1.09035	0.547295	Not Interesting
34030	g26799	sp|Q03326|OXIR_STRAT	0.791391	0.66963	Not Interesting
34036	g26801	NA	-0.607257	-0.226454	Not Interesting
34037	g26801	NA	-1.16664	-1.13324	Not Interesting
34059	g26809	NA	0.540884	0.447655	Not Interesting
3406	g23541	sp|Q62798|DRGX_RAT	-0.798024	-0.66731	Not Interesting
34060	g26809	NA	2.29529	1.87834	Not Interesting
34089	g26815	sp|O95475|SIX6_HUMAN	-0.778471	-0.466967	Not Interesting
34091	g26815	sp|O95475|SIX6_HUMAN	-0.982446	-0.908187	Not Interesting
34108	g26819	NA	0.85212	0.475574	Not Interesting
34109	g26819	NA	1.07856	0.645673	Not Interesting
34120	g26832	NA	0.491414	0.61418	Not Interesting
34121	g26832	NA	0.921461	0.920156	Not Interesting
34126	g26833	sp|P24014|SLIT_DROME	0.653172	0.142772	Not Interesting
34160	g26840	sp|Q566L4|ZN703_XENTR	0.518707	0.323314	Not Interesting
34162	g26840	sp|Q566L4|ZN703_XENTR	-1.27442	-1.04638	Not Interesting
34277	g25771	sp|P38977|ANTA_HYDVU	-0.825342	-1.45095	Not Interesting
34280	g25772	sp|B1P1J3|CYT_CHIGU	-0.544203	-0.420124	Not Interesting
34285	g25773	sp|P38977|ANTA_HYDVU	-0.606848	-1.27667	Not Interesting
34287	g25773	sp|P38977|ANTA_HYDVU	-0.796826	-1.78941	Not Interesting
34325	g25781	NA	-1.21144	-1.33008	Not Interesting
3433	g23544	sp|Q9VHH9|JHD1_DROME	-1.21936	-1.09276	Not Interesting
34370	g25813	sp|P49756|RBM25_HUMAN	0.423354	0.318969	Not Interesting
34447	g32568	NA	-0.634489	-0.462769	Not Interesting
34467	g9617	sp|Q95SX7|RTBS_DROME	2.14396	2.0858	Not Interesting
34473	g20684	sp|Q92859|NEO1_HUMAN	0.72729	0.45034	Not Interesting
34489	g20686	NA	-1.12006	-0.954056	Not Interesting
34490	g20686	NA	-1.13433	-0.897836	Not Interesting
34493	g20686	NA	-0.529337	-0.26094	Not Interesting
34514	g20690	sp|Q6TXF1|ARRD3_RAT	2.51921	2.31569	Not Interesting
34515	g20690	sp|Q6TXF1|ARRD3_RAT	1.56704	1.42131	Not Interesting
34517	g20690	sp|Q6TXF1|ARRD3_RAT	2.11561	1.61466	Not Interesting
34518	g20690	sp|Q6TXF1|ARRD3_RAT	2.45705	1.80671	Not Interesting
34521	g20690	sp|Q6TXF1|ARRD3_RAT	0.635015	0.386728	Not Interesting
34522	g20690	sp|Q6TXF1|ARRD3_RAT	-0.829612	-0.632951	Not Interesting
34525	g20690	sp|Q6TXF1|ARRD3_RAT	0.402432	0.675546	Not Interesting
34526	g20690	sp|Q6TXF1|ARRD3_RAT	1.17255	1.12826	Not Interesting
34539	g20696	sp|Q5R5L7|ARRD3_PONAB	-0.690446	-0.751431	Not Interesting
34557	g20700	sp|Q7TPQ9|ARRD3_MOUSE	0.382088	0.463084	Not Interesting
34610	g6943	sp|Q99LI7|CSTF3_MOUSE	-0.597654	-0.63206	Not Interesting
34630	g6956	NA	0.744085	0.75068	Not Interesting
34644	g6959	sp|Q13423|NNTM_HUMAN	-0.697248	-0.47452	Not Interesting
34651	g6960	sp|P07746|HMGT_ONCMY	-0.54674	-0.654398	Not Interesting
34714	g6983	sp|P28651|CAH8_MOUSE	-0.821522	-0.366936	Not Interesting
34719	g456	sp|P42859|HD_MOUSE	-0.56535	-0.598673	Not Interesting
34720	g456	sp|P42859|HD_MOUSE	-0.645617	-0.709761	Not Interesting
34724	g458	sp|P42859|HD_MOUSE	-0.319205	-0.506007	Not Interesting
34772	g472	sp|Q9TUP7|OX2R_CANLF	0.284816	0.515665	Not Interesting
34777	g10831	NA	-0.896173	-0.640861	Not Interesting
34793	NA	NA	-1.00098	-0.864472	Not Interesting
34799	g19635	sp|Q54RZ7|Y1199_DICDI	-1.23355	-1.30905	Not Interesting
3480	g23558	sp|Q6PAJ1|BCR_MOUSE	-0.720571	-0.636476	Not Interesting
34890	g14375	sp|P21328|RTJK_DROME	-0.832435	-0.427718	Not Interesting
34910	g14378	sp|Q7LHG5|YI31B_YEAST	0.654533	0.270913	Not Interesting
34922	g14380	sp|O77775|NCF2_BOVIN	0.790618	0.752872	Not Interesting
34928	g14380	sp|O77775|NCF2_BOVIN	1.35234	1.41574	Not Interesting
3496	g23560	sp|Q9XWZ2|ACD11_CAEEL	-0.890749	-0.498374	Not Interesting
35248	g10576	NA	-0.505648	-0.915633	Not Interesting
35253	g10580	sp|H2LBU8|YAP1_ORYLA	-0.847365	-0.980951	Not Interesting
3528	g23571	NA	-1.22048	-1.20462	Not Interesting
35327	g4533	NA	0.944983	1.16229	Not Interesting
35368	g4545	NA	-0.430074	-0.688249	Not Interesting
35438	g4566	sp|Q704E8|ABCB7_RAT	1.13971	0.612692	Not Interesting
35451	g4572	sp|O00299|CLIC1_HUMAN	1.283	0.948297	Not Interesting
35452	g13294	NA	0.605626	0.324218	Not Interesting
35479	g26961	sp|P00976|IBPC_BOVIN	1.73685	1.54493	Not Interesting
35480	g26961	sp|P00976|IBPC_BOVIN	1.71183	1.28575	Not Interesting
35487	g26961	sp|P00976|IBPC_BOVIN	1.1812	0.906149	Not Interesting
35543	g31098	sp|P97858|S35B1_MOUSE	-0.907811	-0.882727	Not Interesting
3558	g23575	NA	-0.473052	-0.478494	Not Interesting
35583	g14049	sp|O00566|MPP10_HUMAN	-0.964841	-0.818359	Not Interesting
35587	g14049	sp|O00566|MPP10_HUMAN	0.477293	0.335186	Not Interesting
35669	g4733	sp|Q7Z494|NPHP3_HUMAN	-0.84718	-0.848123	Not Interesting
35685	g4740	NA	0.692944	0.612927	Not Interesting
35816	g1293	NA	-0.731975	-0.1993	Not Interesting
35841	g16164	sp|Q805F9|DDB1_CHICK	0.813725	0.294371	Not Interesting
35846	g16165	sp|Q61467|ZIC4_MOUSE	-0.73219	-0.94102	Not Interesting
35859	g16168	sp|Q90593|GRP78_CHICK	2.1254	2.29368	Not Interesting
35901	g16179	sp|Q9I926|FUCL6_ANGJA	-0.623117	-0.538407	Not Interesting
35948	g21260	sp|Q90610|NEO1_CHICK	-0.577496	-0.49054	Not Interesting
35955	g21263	NA	0.309571	0.481201	Not Interesting
35958	g21264	sp|Q9N1R6|BAT1_RABIT	0.431357	0.311117	Not Interesting
35959	g21264	sp|Q9N1R6|BAT1_RABIT	0.505789	0.562246	Not Interesting
36001	g21274	sp|Q8BG95|MYPT2_MOUSE	0.947743	0.688147	Not Interesting
36016	g21277	sp|P41439|FOLR3_HUMAN	-0.583879	-0.522335	Not Interesting
36051	g8784	sp|A1L1W9|MOT10_DANRE	1.42499	0.788029	Not Interesting
36059	g8784	sp|A1L1W9|MOT10_DANRE	1.07904	0.50956	Not Interesting
36094	g9460	sp|P17900|SAP3_HUMAN	-1.37275	-1.84665	Not Interesting
36105	g21064	NA	-0.864114	-0.734157	Not Interesting
36108	g21065	sp|Q5R9A4|DNJB9_PONAB	1.99379	1.80273	Not Interesting
36137	g21076	sp|A4IIJ3|KIBRA_XENTR	0.447436	0.191556	Not Interesting
36138	g21076	sp|A4IIJ3|KIBRA_XENTR	-0.716987	-0.695666	Not Interesting
36140	g21076	sp|A4IIJ3|KIBRA_XENTR	-0.562488	-0.414607	Not Interesting
36146	g21076	sp|A4IIJ3|KIBRA_XENTR	0.625679	0.97135	Not Interesting
36166	g21085	sp|P37235|HPCL1_HUMAN	-0.583358	-0.529535	Not Interesting
36189	g21088	sp|Q16720|AT2B3_HUMAN	-0.595132	-0.535878	Not Interesting
36190	g21088	sp|Q16720|AT2B3_HUMAN	-0.576819	-0.607981	Not Interesting
36254	g21118	NA	-0.503559	-0.743723	Not Interesting
36255	g21118	NA	-0.646306	-0.557055	Not Interesting
36265	g21119	sp|Q5R7U4|GBG2_PONAB	0.945247	1.63613	Not Interesting
36269	g21120	sp|Q99MI1|RB6I2_MOUSE	0.657079	0.57357	Not Interesting
36277	g21122	NA	-0.894872	-0.870031	Not Interesting
36309	g21127	NA	0.745076	0.907044	Not Interesting
3631	g23601	NA	-0.718006	-0.445398	Not Interesting
36311	g21128	NA	1.36664	1.24606	Not Interesting
36313	g21128	NA	2.40967	1.68298	Not Interesting
36320	g21131	NA	-0.915393	-0.955132	Not Interesting
36340	g21140	sp|P03934|TC1A_CAEEL	-0.867541	-0.874647	Not Interesting
36359	g21147	sp|P79888|DCAM_XENLA	-0.547917	-0.411955	Not Interesting
36426	g32536	sp|Q8VHK1|CSKI2_MOUSE	-0.830897	-0.992081	Not Interesting
36449	g32544	sp|P02269|H2A_ASTRU	-0.699833	-0.874299	Not Interesting
36455	g32547	NA	-0.655358	-0.754821	Not Interesting
36479	g32551	sp|Q5TCZ1|SPD2A_HUMAN	2.08582	1.45292	Not Interesting
36480	g32551	sp|Q5TCZ1|SPD2A_HUMAN	3.6263	3.16926	Not Interesting
36485	g32551	sp|Q5TCZ1|SPD2A_HUMAN	-0.728768	-0.556674	Not Interesting
36517	g32564	NA	-0.713	-0.672494	Not Interesting
36531	g32566	sp|Q5RA10|ADDA_PONAB	0.500368	0.662693	Not Interesting
36538	g30594	sp|Q17770|PDI2_CAEEL	0.452366	0.25773	Not Interesting
3658	g23606	NA	-0.726043	-0.621047	Not Interesting
36592	g3639	sp|Q15427|SF3B4_HUMAN	0.501163	0.788041	Not Interesting
36610	g3641	sp|P11533|DMD_CHICK	0.544942	0.655545	Not Interesting
36612	g3641	sp|P11533|DMD_CHICK	0.500547	0.634326	Not Interesting
3662	g23607	sp|Q99LS3|SERB_MOUSE	1.14744	0.659431	Not Interesting
36653	g3653	sp|O01367|HOW_DROME	-0.862103	-0.830985	Not Interesting
36684	g3660	NA	3.90238	4.20174	Not Interesting
36685	g3660	NA	4.2666	3.67371	Not Interesting
36686	g3660	NA	1.24353	0.833938	Not Interesting
36688	g3660	NA	0.644151	0.57389	Not Interesting
36701	g26390	NA	-0.684245	-0.373733	Not Interesting
36702	g26390	NA	-0.679692	-0.506161	Not Interesting
3673	g23612	sp|Q9WUK2|IF4H_MOUSE	-0.870203	-0.982442	Not Interesting
36732	g27691	sp|P41737|LRCH1_FELCA	-0.59244	-0.440008	Not Interesting
36840	g15582	sp|Q670P5|WNT11_XENLA	-2.44613	-2.41191	Not Interesting
36858	g15585	NA	1.00931	1.56911	Not Interesting
3687	g23613	NA	0.760856	0.577236	Not Interesting
3695	g23615	NA	-0.963127	-0.83639	Not Interesting
36955	g4192	sp|Q08AY6|KT5AA_XENLA	0.75119	0.611535	Not Interesting
3707	g23616	NA	-0.806164	-0.707266	Not Interesting
37087	NA	NA	-0.56575	-0.229874	Not Interesting
37103	g27004	NA	0.781977	0.716558	Not Interesting
37110	g27008	sp|Q9WV54|ASAH1_MOUSE	-0.746495	-0.593052	Not Interesting
37122	g27009	sp|A3KQV2|BROX_DANRE	0.652849	0.37714	Not Interesting
37139	g27013	sp|Q1RMG8|RPAC2_BOVIN	0.520203	0.776915	Not Interesting
37215	g4299	sp|Q9UDY8|MALT1_HUMAN	-0.903663	-0.994879	Not Interesting
37220	g4300	sp|Q8BH60|GOPC_MOUSE	-0.74785	-0.66409	Not Interesting
37238	g4302	sp|Q5BKC9|NGEF_RAT	-0.548146	-0.500423	Not Interesting
37249	g4303	sp|Q5VV41|ARHGG_HUMAN	-0.941761	-0.727207	Not Interesting
37258	g4304	sp|Q04771|ACVR1_HUMAN	-0.815199	-0.578591	Not Interesting
37283	g4307	sp|O60229|KALRN_HUMAN	-0.824989	-0.585835	Not Interesting
37321	g4318	NA	1.32518	0.519026	Not Interesting
37327	g4318	NA	1.13291	0.840937	Not Interesting
37334	g4319	NA	1.45043	1.49809	Not Interesting
37335	g4319	NA	3.22655	2.58844	Not Interesting
37338	g4319	NA	2.28669	1.71309	Not Interesting
37340	g4319	NA	3.40174	2.61686	Not Interesting
37343	g4319	NA	3.21808	2.41219	Not Interesting
37344	g4319	NA	2.46014	1.67456	Not Interesting
37345	g4319	NA	2.26858	1.4757	Not Interesting
37350	g4324	sp|P22274|ARF_CANAL	1.50323	1.2569	Not Interesting
37351	g4324	sp|P22274|ARF_CANAL	2.36498	1.94148	Not Interesting
37353	g4324	sp|P22274|ARF_CANAL	2.4423	1.90521	Not Interesting
3736	g12124	NA	-0.65263	-0.481244	Not Interesting
3737	g12124	NA	-0.533402	-0.458127	Not Interesting
3739	g12125	sp|Q95NI4|CALM_HALOK	1.25604	0.891589	Not Interesting
37448	g22047	NA	0.614556	0.770186	Not Interesting
3748	g12125	sp|Q95NI4|CALM_HALOK	2.57808	2.20668	Not Interesting
37489	g24173	NA	0.271537	0.398362	Not Interesting
3749	g12125	sp|Q95NI4|CALM_HALOK	1.4792	0.833785	Not Interesting
37491	g24173	NA	1.02798	0.655154	Not Interesting
37492	g24173	NA	0.996909	1.12866	Not Interesting
37494	g24173	NA	1.24286	0.968727	Not Interesting
37547	g24190	sp|Q921C5|BICD2_MOUSE	-1.46406	-0.985611	Not Interesting
37549	g24190	sp|Q921C5|BICD2_MOUSE	1.25469	0.319548	Not Interesting
3755	g12126	sp|Q08E00|RASLC_BOVIN	0.587582	0.513805	Not Interesting
37564	g24192	NA	-0.612136	-0.618205	Not Interesting
37568	g24193	NA	0.709371	0.416287	Not Interesting
37639	g24222	sp|Q9QYS2|GRM3_MOUSE	0.527774	0.790087	Not Interesting
37654	g24223	sp|Q9QYS2|GRM3_MOUSE	0.53379	0.568557	Not Interesting
37689	g29077	NA	0.752139	0.753978	Not Interesting
377	g18979	sp|O94913|PCF11_HUMAN	0.63665	0.661694	Not Interesting
3772	g18799	NA	-0.738749	-0.726796	Not Interesting
37750	g29094	NA	-0.658986	-0.745546	Not Interesting
37778	g33125	NA	-0.783549	-0.709691	Not Interesting
37833	g29591	NA	-0.965841	-0.845948	Not Interesting
37840	g29601	sp|Q6DJN2|TRF6B_XENLA	-0.906057	-0.926381	Not Interesting
37849	g29604	sp|Q9BUZ4|TRAF4_HUMAN	-0.775652	-1.02814	Not Interesting
37867	g29608	NA	-0.713596	-0.556088	Not Interesting
37889	g29616	sp|D3YXG0|HMCN1_MOUSE	0.5855	0.578073	Not Interesting
37930	g29628	sp|A8WG21|SNXAB_DANRE	-1.90682	-1.20826	Not Interesting
37956	g22334	NA	0.464639	0.583932	Not Interesting
37963	g22338	sp|Q5EA28|CXXC1_BOVIN	-0.577648	-0.539713	Not Interesting
38024	g2906	sp|Q504Y0|S39AC_HUMAN	-0.580424	-0.613995	Not Interesting
38025	g2906	sp|Q504Y0|S39AC_HUMAN	-0.49452	-0.38787	Not Interesting
38031	g2908	sp|Q6PEH9|S39AA_DANRE	1.35241	0.789476	Not Interesting
3804	g18805	sp|P35448|TSP1_XENLA	-1.22757	-0.822777	Not Interesting
38045	g2913	NA	-0.868881	-0.776827	Not Interesting
38055	g2915	NA	-0.948878	-1.05192	Not Interesting
3808	g18806	sp|P0CB22|ATX2_ARATH	-0.75757	-0.580976	Not Interesting
38093	g2932	sp|Q708S3|ASI4B_DANRE	-0.568688	-0.667304	Not Interesting
38146	g2954	sp|P32738|CLAT_RAT	1.13417	0.864217	Not Interesting
38147	g2954	sp|P32738|CLAT_RAT	1.89971	1.54191	Not Interesting
38161	g2958	NA	-0.808546	-0.774786	Not Interesting
3817	g18807	sp|P49166|RL37A_YEAST	-0.554839	-0.433091	Not Interesting
38187	g2961	NA	1.13112	0.676136	Not Interesting
38341	g10696	sp|Q5ZLD7|VPS53_CHICK	0.639789	0.314253	Not Interesting
38345	g10697	NA	0.670186	0.554335	Not Interesting
38385	g2291	sp|Q9CZR2|NALD2_MOUSE	-1.69428	-1.61504	Not Interesting
38403	g2295	NA	-0.746441	-0.897618	Not Interesting
38404	g2295	NA	-1.08099	-0.629912	Not Interesting
38408	g2295	NA	-0.897745	-0.900219	Not Interesting
38411	g2296	NA	-0.994666	-0.797076	Not Interesting
38412	g2296	NA	-0.770232	-0.695028	Not Interesting
3842	g18812	sp|Q66JF3|MKNK1_XENTR	-1.11128	-0.726713	Not Interesting
3843	g18812	sp|Q66JF3|MKNK1_XENTR	0.385914	0.327166	Not Interesting
3848	g18813	sp|Q6DE73|OGFD1_XENLA	1.53358	1.42147	Not Interesting
38521	g8869	NA	-1.40251	-1.40097	Not Interesting
38529	g8871	NA	0.851516	0.639444	Not Interesting
3854	g18817	sp|Q96E17|RAB3C_HUMAN	-0.33964	-0.705489	Not Interesting
38604	g15984	sp|P83941|ELOC_RAT	-1.00474	-0.744334	Not Interesting
38605	g15984	sp|P83941|ELOC_RAT	-0.685948	-0.583264	Not Interesting
38610	g15985	sp|Q496Y0|LONF3_HUMAN	0.975903	0.860408	Not Interesting
38620	g15989	NA	-1.16962	-0.70969	Not Interesting
38623	g15989	NA	-1.02574	-0.630035	Not Interesting
38626	g15990	sp|Q91WM3|U3IP2_MOUSE	-0.898792	-1.13382	Not Interesting
3864	g18819	NA	0.285521	0.466204	Not Interesting
38653	g15997	sp|P51611|HCFC1_MESAU	-0.321648	-0.679414	Not Interesting
38717	g16024	sp|Q5SVZ6|ZMYM1_HUMAN	1.03022	0.629077	Not Interesting
38720	g16024	sp|Q5SVZ6|ZMYM1_HUMAN	1.20623	0.663453	Not Interesting
38747	g16033	sp|Q09930|DIRA_CAEEL	1.77389	1.79802	Not Interesting
38749	g16034	sp|P48442|CASR_RAT	0.688057	0.700666	Not Interesting
38766	g16038	sp|Q60809|CNOT7_MOUSE	-0.361348	-0.159908	Not Interesting
38773	g16040	sp|P14099|PDE2A_BOVIN	1.07866	1.36865	Not Interesting
38836	g16071	sp|Q9LVK9|ALA7_ARATH	1.09951	0.524813	Not Interesting
38848	g16071	sp|Q9LVK9|ALA7_ARATH	0.514457	0.374198	Not Interesting
38849	g16071	sp|Q9LVK9|ALA7_ARATH	0.758375	0.108211	Not Interesting
38852	g16072	sp|Q58DT4|P5CR1_BOVIN	-1.50826	-1.26923	Not Interesting
38853	g16072	sp|Q58DT4|P5CR1_BOVIN	-1.03656	-0.97464	Not Interesting
3888	g18825	sp|A8XNX8|LGC4_CAEBR	-0.789897	-0.47528	Not Interesting
38880	g16092	sp|A7S3J7|RS3A_NEMVE	-0.590202	-0.66616	Not Interesting
38904	g15810	sp|Q9QYS2|GRM3_MOUSE	-0.892799	-0.629335	Not Interesting
38961	g2411	sp|Q8C1B1|CAMP2_MOUSE	-0.619016	-0.384869	Not Interesting
39003	g2419	sp|Q14209|E2F2_HUMAN	0.631055	0.342719	Not Interesting
39016	g2425	sp|Q9NBX4|RTXE_DROME	-0.617722	-0.437401	Not Interesting
39090	g2463	sp|P50025|DNAJ_LEGPN	-0.51467	-0.618149	Not Interesting
39093	g2463	sp|P50025|DNAJ_LEGPN	-0.655468	-1.0386	Not Interesting
39096	g2466	NA	2.66074	2.5606	Not Interesting
39097	g2466	NA	0.600409	0.475337	Not Interesting
39101	g2467	NA	-0.806821	-0.620286	Not Interesting
39114	g2470	sp|Q9I8B3|RB24B_XENLA	-0.550635	-0.433802	Not Interesting
39140	g2475	NA	-0.502516	-0.577714	Not Interesting
39146	g2479	sp|Q5PQ44|CD022_XENLA	-0.977459	-0.570772	Not Interesting
39270	g22286	sp|B3VSC2|TSN9_SHEEP	2.04514	1.35226	Not Interesting
39275	g22286	sp|B3VSC2|TSN9_SHEEP	1.98577	1.509	Not Interesting
39278	g22286	sp|B3VSC2|TSN9_SHEEP	1.45479	1.60855	Not Interesting
3929	g18832	sp|Q3ZCU0|YK006_HUMAN	-0.740296	-0.651405	Not Interesting
39295	g22293	NA	-1.0951	-0.880446	Not Interesting
39311	g22300	sp|Q7SZ59|RASLC_DANRE	-1.61479	-1.53952	Not Interesting
39314	g22300	sp|Q7SZ59|RASLC_DANRE	0.574709	0.391543	Not Interesting
39341	g22313	NA	0.803952	1.04751	Not Interesting
39345	g22314	sp|Q9H841|NPAL2_HUMAN	-0.395056	-0.479082	Not Interesting
39397	g22327	sp|P21328|RTJK_DROME	-0.585433	-0.534657	Not Interesting
39431	g15344	NA	-0.630308	-0.461247	Not Interesting
39444	g15345	sp|Q6GN42|CTL4_XENLA	0.694739	0.572791	Not Interesting
3945	g18842	sp|Q6DID7|WLS_MOUSE	0.814576	0.689468	Not Interesting
39457	g15359	sp|O60481|ZIC3_HUMAN	-0.915097	-1.04331	Not Interesting
39458	g15359	sp|O60481|ZIC3_HUMAN	-0.529418	-0.359661	Not Interesting
39459	g15359	sp|O60481|ZIC3_HUMAN	-0.774928	-0.924371	Not Interesting
3946	g18842	sp|Q6DID7|WLS_MOUSE	1.56908	1.24297	Not Interesting
39464	g15359	sp|O60481|ZIC3_HUMAN	-0.515527	-0.690339	Not Interesting
39481	g15367	NA	0.935454	0.55697	Not Interesting
39522	g5506	NA	-0.471445	-0.720007	Not Interesting
39535	g5516	sp|P33527|MRP1_HUMAN	0.795319	0.707453	Not Interesting
39538	g5519	sp|Q5F364|MRP1_CHICK	-2.20225	-1.6116	Not Interesting
39539	g5519	sp|Q5F364|MRP1_CHICK	-1.15467	-0.924788	Not Interesting
39542	g5519	sp|Q5F364|MRP1_CHICK	-0.801574	-0.709602	Not Interesting
39547	g5520	NA	1.46826	0.95921	Not Interesting
39548	g5520	NA	0.731071	0.61289	Not Interesting
39565	g5525	sp|P11308|ERG_HUMAN	-0.62258	0.16594	Not Interesting
39604	g5534	sp|P39896|TCMO_STRGA	-1.28373	-1.04305	Not Interesting
39637	g5548	sp|P47820|ACE_RAT	-0.610695	-0.533228	Not Interesting
3971	g19617	sp|Q68FD5|CLH1_MOUSE	-0.834865	-0.823368	Not Interesting
39736	g21683	sp|O65639|CSP1_ARATH	-0.417222	-0.605876	Not Interesting
39795	g21693	sp|O12946|P53_PLAFE	0.895911	0.736454	Not Interesting
39808	g21702	sp|Q8CIW6|S26A6_MOUSE	2.58442	1.96047	Not Interesting
3981	g19618	sp|P11442|CLH1_RAT	-0.7762	-0.802936	Not Interesting
39815	g21702	sp|Q8CIW6|S26A6_MOUSE	0.428828	0.334805	Not Interesting
39816	g21703	NA	0.229498	0.50721	Not Interesting
39817	g21703	NA	1.03404	0.862193	Not Interesting
3982	g19618	sp|P11442|CLH1_RAT	-0.805333	-0.492132	Not Interesting
39822	g21710	sp|Q1JPX3|SYFA_DANRE	0.625571	0.607765	Not Interesting
39828	g21711	NA	1.61948	1.14599	Not Interesting
39830	g21711	NA	0.964505	0.89155	Not Interesting
39865	g19858	sp|Q8I1F4|FBRL_DROER	-0.72807	-0.654899	Not Interesting
39917	g27822	NA	0.856627	0.488591	Not Interesting
39942	g27825	sp|Q27415|NLP_DROME	-0.591238	-0.456313	Not Interesting
39965	g27837	NA	2.16489	1.11238	Not Interesting
39966	g27838	NA	0.669299	0.498198	Not Interesting
40015	g27858	NA	-0.971964	-0.815165	Not Interesting
40045	g25379	NA	0.349378	0.415509	Not Interesting
40094	g29498	NA	-0.731328	-0.540497	Not Interesting
40113	g13793	NA	-1.04539	-0.964887	Not Interesting
40151	g8048	sp|Q58DD2|S2611_BOVIN	0.811552	0.610651	Not Interesting
40179	g33631	sp|Q90839|DKK3_CHICK	-0.759011	-0.665456	Not Interesting
40212	g33646	sp|E9Q634|MYO1E_MOUSE	0.642452	0.426276	Not Interesting
40218	g33648	sp|Q9HD45|TM9S3_HUMAN	0.239164	0.447355	Not Interesting
40226	g33649	NA	0.754712	0.527784	Not Interesting
40241	g33661	sp|Q5R733|CPEB1_PONAB	1.2132	1.25269	Not Interesting
40243	g33661	sp|Q5R733|CPEB1_PONAB	-0.913138	-0.907195	Not Interesting
40280	g33668	sp|Q9P2R6|RERE_HUMAN	0.403657	0.50392	Not Interesting
40300	g33670	NA	1.74025	1.10337	Not Interesting
40309	g33671	sp|Q8NWQ4|TDCB_STAAW	0.9413	0.603603	Not Interesting
40339	g33681	NA	-0.647099	-0.460605	Not Interesting
4040	g28778	NA	-0.830984	-0.709718	Not Interesting
40441	g17220	NA	-0.517545	-0.790761	Not Interesting
40467	g17232	sp|Q5RAL7|B3GL1_PONAB	0.591159	0.622549	Not Interesting
40502	g17241	NA	-0.674291	-0.810469	Not Interesting
4051	g20598	sp|Q9DBN1|STR6L_MOUSE	-1.40869	-0.962097	Not Interesting
40566	g17270	sp|P00630|PA2_APIME	-0.783187	-0.568332	Not Interesting
40572	g17271	sp|O00418|EF2K_HUMAN	-0.982407	-0.932101	Not Interesting
40598	g17283	sp|Q5NVM8|RNPS1_PONAB	-0.578076	-0.715819	Not Interesting
40601	g17283	sp|Q5NVM8|RNPS1_PONAB	-0.882409	-0.731832	Not Interesting
40613	g17289	sp|Q10741|ADA10_BOVIN	0.677379	0.353361	Not Interesting
40667	g17298	sp|P12849|KAP1_MOUSE	0.961611	0.295681	Not Interesting
40668	g17298	sp|P12849|KAP1_MOUSE	-0.944271	-0.968016	Not Interesting
4069	g20600	sp|Q80TI0|GRM1B_MOUSE	0.721353	0.423595	Not Interesting
40705	g17315	sp|Q8RPX2|AGUA_LACSS	-1.06132	-0.805595	Not Interesting
4073	g20601	sp|Q49B93|SC5AC_MOUSE	-0.478896	-0.797341	Not Interesting
40760	NA	NA	-1.36722	-1.32109	Not Interesting
40764	NA	NA	-1.04599	-1.05502	Not Interesting
40822	g10483	sp|Q5XXP2|OPN4_PHOSU	0.814913	0.257682	Not Interesting
40876	g16764	NA	0.618777	0.629567	Not Interesting
40905	g16769	sp|Q8N2S1|LTBP4_HUMAN	0.940891	0.872762	Not Interesting
40920	g16771	NA	-1.09382	-0.781077	Not Interesting
40921	g16772	sp|P08155|KRH1_DROME	-1.22438	-1.55132	Not Interesting
40922	g16772	sp|P08155|KRH1_DROME	-0.547078	-0.630851	Not Interesting
40923	g16772	sp|P08155|KRH1_DROME	-0.884287	-0.855443	Not Interesting
40924	g16772	sp|P08155|KRH1_DROME	-1.26838	-0.966541	Not Interesting
40968	g16788	NA	-0.544651	-0.428404	Not Interesting
40979	g16791	sp|Q6PCX7|RGMA_MOUSE	-0.674429	-0.331611	Not Interesting
41015	g16800	sp|Q96DM1|PGBD4_HUMAN	-0.674797	-0.398655	Not Interesting
41016	g16800	sp|Q96DM1|PGBD4_HUMAN	-0.486222	-0.409761	Not Interesting
41036	g17783	sp|Q8K4H1|KFA_MOUSE	-1.03234	-0.878419	Not Interesting
41046	g17786	NA	-1.13732	-0.926874	Not Interesting
41050	g17787	sp|P57729|RAB38_HUMAN	-1.0171	-0.524367	Not Interesting
4107	g20603	sp|Q99J45|NRBP_MOUSE	1.45902	1.75479	Not Interesting
41080	g17795	sp|Q61847|MEP1B_MOUSE	-0.797322	-0.928141	Not Interesting
4111	g20604	sp|Q26486|FKBP4_SPOFR	-0.647343	-0.459393	Not Interesting
41127	g17805	sp|Q9DAK2|PACRG_MOUSE	-0.711503	-0.770392	Not Interesting
4114	g20604	sp|Q26486|FKBP4_SPOFR	0.20326	0.624268	Not Interesting
41152	g17819	sp|Q6AZT7|NPHP3_XENLA	-1.10812	-0.850159	Not Interesting
4116	g20604	sp|Q26486|FKBP4_SPOFR	-0.933718	-0.912161	Not Interesting
4117	g20604	sp|Q26486|FKBP4_SPOFR	1.42021	1.19793	Not Interesting
41222	g30952	sp|P34737|RS15_PODAS	-0.588845	-0.684652	Not Interesting
41276	g30964	NA	-1.26546	-1.27062	Not Interesting
41283	g30968	NA	0.556315	0.511714	Not Interesting
41344	g30982	sp|A0JP85|CNOT1_XENTR	-0.565183	-0.563219	Not Interesting
4137	g20610	NA	-0.799611	-0.900329	Not Interesting
41404	g27379	NA	1.1909	0.750323	Not Interesting
41443	g27399	NA	-0.935458	-0.824763	Not Interesting
4145	g20611	sp|B3EWZ8|ECT_ACRMI	1.30622	0.738971	Not Interesting
41456	g27404	sp|Q9UHJ3|SMBT1_HUMAN	-0.889623	-0.579698	Not Interesting
4150	g20613	NA	0.53297	0.967303	Not Interesting
41540	g27426	sp|P55115|NAS15_CAEEL	0.733037	0.861979	Not Interesting
41565	g27438	NA	-0.834553	-0.735083	Not Interesting
4158	g20614	NA	1.02419	0.804779	Not Interesting
4159	g20614	NA	1.04476	1.0222	Not Interesting
41598	g27447	NA	-1.00701	-0.454915	Not Interesting
41619	g27451	sp|Q5SWY8|SC5AA_MOUSE	-0.408564	-0.330476	Not Interesting
41633	g27456	sp|Q18246|RAP1_CAEEL	0.634766	0.44418	Not Interesting
41654	g27473	NA	0.84799	0.273392	Not Interesting
41661	g27484	sp|J7FCF0|DMR3T_HORSE	0.944182	0.799291	Not Interesting
4168	g20632	NA	1.37733	1.48039	Not Interesting
41699	g27497	NA	0.582919	0.661955	Not Interesting
41711	g27497	NA	-0.528021	-0.697914	Not Interesting
4172	g20636	sp|P42026|NDUS7_BOVIN	-1.12377	-1.12001	Not Interesting
41740	NA	NA	-0.250214	-0.431536	Not Interesting
41770	g33315	sp|Q6S9Z5|ZN474_HUMAN	0.743176	0.582506	Not Interesting
41797	NA	NA	0.761615	0.40165	Not Interesting
41804	g14683	NA	-0.499729	-0.55492	Not Interesting
41814	g14192	sp|Q3UHD1|BAI1_MOUSE	1.15233	0.503971	Not Interesting
41816	g14192	sp|Q3UHD1|BAI1_MOUSE	-1.12797	-1.15245	Not Interesting
4182	g20637	sp|A2VDZ3|MEF2A_BOVIN	0.656961	0.458795	Not Interesting
41858	g4662	sp|Q9V3H2|PSDE_DROME	0.391142	0.33739	Not Interesting
41876	g21523	NA	1.29471	0.565684	Not Interesting
4192	g20640	sp|Q25197|HTK7_HYDVU	-1.32054	-1.11917	Not Interesting
41925	g25742	sp|E7F7X0|LMOD3_DANRE	-0.531161	-0.48731	Not Interesting
41967	g25762	sp|Q10651|A4_CAEEL	0.794121	0.51504	Not Interesting
41970	g25762	sp|Q10651|A4_CAEEL	0.50354	0.336888	Not Interesting
41979	g25766	NA	-1.10203	-0.851034	Not Interesting
41981	g25767	sp|P85838|FRIH_TREBE	-0.897141	-0.764495	Not Interesting
41983	g25767	sp|P85838|FRIH_TREBE	-1.11464	-1.22482	Not Interesting
41997	g25768	sp|Q5R5F8|PANK4_PONAB	0.376814	0.389557	Not Interesting
42027	g21401	NA	1.19544	1.70189	Not Interesting
42078	g7749	NA	-0.795515	-0.596056	Not Interesting
42168	g26473	NA	0.398221	0.355409	Not Interesting
42220	g26481	NA	-0.700693	-0.487858	Not Interesting
42232	g21342	NA	-0.61379	-0.484605	Not Interesting
42293	g12179	NA	0.518022	0.638547	Not Interesting
42301	g12179	NA	1.10182	0.716851	Not Interesting
4233	g20654	sp|B3EWZ8|ECT_ACRMI	-0.700799	-0.951552	Not Interesting
42374	g12204	NA	-0.618413	-0.73943	Not Interesting
42421	g12222	sp|P21328|RTJK_DROME	1.31737	1.09049	Not Interesting
42457	g12232	sp|P33402|GCYA2_HUMAN	-0.749639	-0.858146	Not Interesting
42466	g12236	NA	0.497717	0.453463	Not Interesting
42467	g12236	NA	2.3264	2.32203	Not Interesting
4253	g20656	NA	3.04269	2.57679	Not Interesting
4254	g20656	NA	1.39961	1.4843	Not Interesting
42548	g19652	sp|O14353|BPL1_SCHPO	-0.825609	-0.652793	Not Interesting
42573	g19670	sp|Q6ZWX0|ASTER_MOUSE	0.524344	0.464503	Not Interesting
42629	g19688	sp|B4KMZ1|LPHN_DROMO	-0.588252	-0.344183	Not Interesting
42630	g19688	sp|B4KMZ1|LPHN_DROMO	-0.71499	-0.479903	Not Interesting
42634	g19688	sp|B4KMZ1|LPHN_DROMO	-0.798023	-0.772378	Not Interesting
42641	g19689	sp|C0HK24|ELEL_ECHLU	-0.593833	-0.521426	Not Interesting
42671	NA	NA	0.678033	1.60767	Not Interesting
42675	g20736	sp|P28175|LFC_TACTR	2.167	1.59532	Not Interesting
42678	g20323	NA	1.3531	1.23829	Not Interesting
42680	g20323	NA	1.38119	1.27854	Not Interesting
42681	g20323	NA	1.44086	1.68571	Not Interesting
42687	g26061	sp|P48740|MASP1_HUMAN	1.97364	1.73761	Not Interesting
42688	g26061	sp|P48740|MASP1_HUMAN	2.08794	1.73741	Not Interesting
42713	NA	NA	3.35433	2.86799	Not Interesting
42721	g11338	NA	-0.651778	-0.538341	Not Interesting
42728	g11339	NA	-0.752979	-0.585613	Not Interesting
42729	g11339	NA	-1.03921	-0.932466	Not Interesting
42731	g11341	NA	-0.609226	-0.659252	Not Interesting
4274	g20662	sp|Q6UUV9|CRTC1_HUMAN	0.913029	0.34836	Not Interesting
42758	g11350	NA	0.613582	0.364408	Not Interesting
42770	g11351	sp|Q7SIB2|CO4A1_BOVIN	1.3952	0.814854	Not Interesting
42771	g11351	sp|Q7SIB2|CO4A1_BOVIN	2.78904	2.00819	Not Interesting
42772	g11352	sp|P08120|CO4A1_DROME	3.00792	2.11641	Not Interesting
42784	g11355	sp|P27393|CO4A2_ASCSU	1.72291	1.14313	Not Interesting
42786	g11355	sp|P27393|CO4A2_ASCSU	-1.09488	-1.07752	Not Interesting
42793	g11359	NA	-2.55818	-1.27335	Not Interesting
42802	g11363	sp|P35520|CBS_HUMAN	-0.859739	-0.815886	Not Interesting
42804	g11363	sp|P35520|CBS_HUMAN	-0.885798	-1.00117	Not Interesting
42831	g11373	sp|Q54CS8|PEX6_DICDI	-0.956847	-0.802818	Not Interesting
42869	g11395	sp|Q9R087|GPC6_MOUSE	-1.37197	-1.55356	Not Interesting
42874	g11395	sp|Q9R087|GPC6_MOUSE	-0.807415	-0.598042	Not Interesting
42888	g11398	sp|Q7SXW3|LRC40_DANRE	1.51718	1.39276	Not Interesting
42931	g11404	NA	0.655829	0.834655	Not Interesting
42990	g8034	NA	-0.572412	-0.361752	Not Interesting
42991	g8035	NA	-0.871331	-0.947241	Not Interesting
43124	NA	NA	-1.31523	-0.769528	Not Interesting
43193	g13583	NA	0.381642	0.584911	Not Interesting
4321	g20673	sp|A2PYH4|HFM1_HUMAN	-0.84685	-0.822536	Not Interesting
43210	g13584	NA	0.627245	0.876317	Not Interesting
43224	g13586	NA	-0.750735	-0.750838	Not Interesting
43228	g13587	sp|Q64121|PRLHR_RAT	1.50499	0.734704	Not Interesting
43231	g13587	sp|Q64121|PRLHR_RAT	1.91309	1.41698	Not Interesting
4327	g20674	sp|P22770|ACHA7_CHICK	-0.518714	-0.593524	Not Interesting
43305	g13600	sp|A1L3F4|MEX3B_XENLA	0.767642	0.531398	Not Interesting
43312	g13601	sp|Q8NDA2|HMCN2_HUMAN	-0.761785	-0.717854	Not Interesting
43316	g13601	sp|Q8NDA2|HMCN2_HUMAN	0.587316	0.795022	Not Interesting
4333	g20678	NA	-0.595522	-0.793256	Not Interesting
4334	g20679	NA	-0.668948	-0.609656	Not Interesting
43342	g13602	sp|P13234|KCC4_RAT	0.270949	0.452968	Not Interesting
4335	g20679	NA	-0.77062	-0.540802	Not Interesting
4337	g20679	NA	-1.25328	-1.07271	Not Interesting
43385	g1515	sp|P28334|5HT1B_MOUSE	-0.604538	-0.762504	Not Interesting
43396	g1517	sp|A7SD85|CDC5L_NEMVE	0.273925	0.403988	Not Interesting
43428	g1532	sp|Q9BZC7|ABCA2_HUMAN	-0.63537	-0.40309	Not Interesting
43478	g8201	sp|Q496Y0|LONF3_HUMAN	0.599745	0.409397	Not Interesting
43512	g31821	NA	-0.598556	-0.548112	Not Interesting
43522	g31824	NA	0.772863	0.679699	Not Interesting
43548	g1974	sp|Q5E9J2|CNPD1_BOVIN	-0.985239	-0.504774	Not Interesting
43601	g1988	sp|O75840|KLF7_HUMAN	-0.466051	-0.439371	Not Interesting
43641	g1998	sp|Q3SZL3|MBOA5_BOVIN	-1.88532	-1.79679	Not Interesting
43678	g2009	sp|P15454|KGUA_YEAST	-0.358089	-0.363135	Not Interesting
43690	g2010	sp|O94827|PKHG5_HUMAN	0.898665	0.709818	Not Interesting
43691	g2010	sp|O94827|PKHG5_HUMAN	1.11702	0.888222	Not Interesting
43696	g2011	sp|O94827|PKHG5_HUMAN	-0.892334	-0.710648	Not Interesting
43730	g2021	sp|O17389|TYB_CAEEL	1.09246	0.670133	Not Interesting
43772	g25200	NA	-1.16101	-0.963846	Not Interesting
43832	g27805	NA	-0.848414	-0.846993	Not Interesting
4389	g23694	sp|Q6P5H6|FRMD5_MOUSE	-0.801011	-0.851462	Not Interesting
43924	g7906	NA	-0.679735	-0.585592	Not Interesting
43998	g7411	sp|Q9CR23|TMEM9_MOUSE	0.374723	0.4594	Not Interesting
44	g5789	sp|Q7SY06|HACD3_DANRE	1.63009	1.18622	Not Interesting
44111	g30463	sp|Q5RBM8|RBM12_PONAB	0.377769	0.551696	Not Interesting
44112	g30463	sp|Q5RBM8|RBM12_PONAB	-0.438276	-0.497731	Not Interesting
44130	g30467	sp|P70031|CCKAR_XENLA	0.441625	0.317214	Not Interesting
44240	g10910	NA	-0.741529	-0.950499	Not Interesting
443	g17117	NA	0.62305	0.320333	Not Interesting
44310	g11453	NA	0.988343	1.38991	Not Interesting
4433	g31029	sp|Q7PQ25|CCDCX_ANOGA	0.839825	0.569286	Not Interesting
44345	g15532	NA	-0.564829	-0.426214	Not Interesting
44351	g15558	NA	-0.854361	-0.574568	Not Interesting
44437	NA	NA	-0.352335	-0.630084	Not Interesting
44453	g29631	sp|P21328|RTJK_DROME	-1.48297	-0.724722	Not Interesting
44458	g29631	sp|P21328|RTJK_DROME	0.583044	0.547154	Not Interesting
44471	g29638	sp|P10039|TENA_CHICK	-0.540605	-0.480793	Not Interesting
44476	g29638	sp|P10039|TENA_CHICK	-0.542439	-0.287005	Not Interesting
44493	g29640	sp|Q8BFY9|TNPO1_MOUSE	-1.02863	-1.01311	Not Interesting
44532	g24303	NA	0.820153	0.415936	Not Interesting
44564	g24312	sp|P48442|CASR_RAT	-0.577438	-0.415344	Not Interesting
44593	g24323	NA	-0.456885	-0.351449	Not Interesting
44606	g24326	NA	-0.791044	-0.745358	Not Interesting
44703	g9037	sp|Q812A5|PRR5_MOUSE	0.682794	0.309628	Not Interesting
44708	g9039	NA	-0.697213	-0.782385	Not Interesting
44735	g9051	sp|Q95SX7|RTBS_DROME	-0.720543	-0.709007	Not Interesting
44737	g9051	sp|Q95SX7|RTBS_DROME	-0.747634	-0.500678	Not Interesting
4474	g31033	sp|Q9VBW3|CAD96_DROME	0.456963	0.695028	Not Interesting
44747	g9055	NA	-0.346584	-0.502088	Not Interesting
44748	g9057	NA	-0.512999	-0.435761	Not Interesting
44769	g9060	sp|A7SA47|EIF3H_NEMVE	-1.05251	-0.71878	Not Interesting
44780	g9063	sp|Q9UPI3|FLVC2_HUMAN	-0.956005	-0.725066	Not Interesting
44806	g28208	sp|P18461|FGFR2_CHICK	-0.684372	-0.489337	Not Interesting
44809	g28211	NA	0.491281	0.74388	Not Interesting
44815	g28212	sp|O17185|SUP9_CAEEL	-0.394688	-0.702493	Not Interesting
44828	g28215	sp|P54527|YQIK_BACSU	-0.432652	-0.74834	Not Interesting
44840	g28218	sp|Q5GH73|XKR6_HUMAN	-0.737696	-0.526458	Not Interesting
4486	g31041	sp|Q9QUN9|DKK3_MOUSE	0.667284	0.41777	Not Interesting
44873	g28229	sp|Q3SZJ4|PTGR1_BOVIN	-0.687405	-0.579309	Not Interesting
44881	g28232	NA	-0.951286	-1.17695	Not Interesting
44886	g28236	NA	-0.67361	-0.521557	Not Interesting
44908	g28244	NA	0.588105	0.92548	Not Interesting
45011	g28284	sp|A1L2I9|T214B_XENLA	0.957783	0.835161	Not Interesting
45014	g28284	sp|A1L2I9|T214B_XENLA	1.41424	0.889208	Not Interesting
45036	g19129	sp|Q3EAQ5|PTR36_ARATH	-1.4648	-1.3727	Not Interesting
4507	g31056	NA	1.58755	0.698539	Not Interesting
45149	g8528	sp|Q14568|HS902_HUMAN	0.289864	0.45	Not Interesting
45158	g21825	NA	-0.922265	-0.799295	Not Interesting
45160	g21825	NA	0.891838	0.694522	Not Interesting
45177	g21831	sp|Q6QMZ4|RL6_CHILA	-0.386928	-0.367098	Not Interesting
45196	g21839	NA	-0.718855	-0.384053	Not Interesting
45197	g21843	NA	-2.00418	-0.874347	Not Interesting
45219	g21853	sp|Q6PFQ2|EIF3C_DANRE	-0.497008	-0.735601	Not Interesting
45258	g21865	NA	0.909285	0.917813	Not Interesting
45266	g21867	NA	-1.12252	-0.64586	Not Interesting
45293	g26253	NA	1.38506	1.06532	Not Interesting
45297	g26255	NA	2.48689	2.03611	Not Interesting
45305	NA	NA	-0.598347	-0.596955	Not Interesting
45318	g29984	NA	0.560629	0.488774	Not Interesting
45325	g29986	sp|Q5T011|SZT2_HUMAN	0.907052	0.943857	Not Interesting
45383	g30012	NA	-0.950169	-0.764178	Not Interesting
45405	g30025	sp|O08984|LBR_RAT	-0.558524	-0.706189	Not Interesting
45407	g30025	sp|O08984|LBR_RAT	-0.563928	-0.401922	Not Interesting
45433	g30036	sp|Q6NSQ7|LTV1_MOUSE	-0.616602	-0.339225	Not Interesting
45541	g30081	sp|Q32MH5|F214A_HUMAN	0.463583	0.231966	Not Interesting
[truncated: 2,802 more rows]

## Sheet: Fig. 1E
Gene ID	Swissprot Annotation	Foot Reg logFC	Head Reg logFC	Structural Enrichment
g10034	sp|P08419|CEL2A_PIG	0.508656	0.439752	Not Interesting
g10056	sp|P0CJ14|VP302_LYCMC	6.34716	6.5382	Not Interesting
g10300	sp|Q76KP1|B4GN4_HUMAN	0.71566	1.61946	Not Interesting
g10368	NA	-0.856833	-0.271415	Not Interesting
g10485	NA	0.506322	0.527551	Not Interesting
g10513	sp|Q9DB27|MCTS1_MOUSE	0.338701	0.392381	Not Interesting
g10536	sp|Q08874|MITF_MOUSE	-0.41841	-0.569552	Not Interesting
g10585	sp|Q8IZJ1|UNC5B_HUMAN	1.99759	1.70006	Not Interesting
g10594	sp|O35426|XBP1_MOUSE	0.614704	0.728005	Not Interesting
g1063	sp|P0DN09|VKT5_ANEVI	1.78711	1.86544	Not Interesting
g1064	sp|Q28864|TFPI1_MACMU	1.59982	1.69579	Not Interesting
g10649	sp|Q9VJ79|PDE11_DROME	-0.331554	-0.440777	Not Interesting
g10650	sp|Q7LL04|YQK1_SCHPO	0.173918	0.777212	Not Interesting
g10680	sp|H2A0N9|KCP4_PINMG	1.90923	3.4942	Head
g10706	sp|P0CP96|FKBP2_CRYNJ	-0.204859	-0.40252	Not Interesting
g10737	sp|D4AK17|PLCX1_ARTBC	0.575533	0.87664	Not Interesting
g10787	sp|D3ZHA0|FLNC_RAT	-0.120215	-0.573264	Not Interesting
g10817	sp|Q26627|SUREJ_STRPU	-0.852002	-0.0692589	Not Interesting
g10818	sp|Q7TN88|PK1L2_MOUSE	-0.949319	0.0375678	Not Interesting
g10850	NA	-0.188315	-1.14789	Not Interesting
g10863	NA	1.32081	1.68999	Not Interesting
g10915	sp|P24288|BCAT1_MOUSE	0.466915	0.315285	Not Interesting
g10932	sp|P29061|CHIB_TOBAC	-1.05565	-1.05592	Not Interesting
g10933	sp|Q9Y2H1|ST38L_HUMAN	0.18148	0.432951	Not Interesting
g10944	sp|Q9PSX7|RHOC_CHICK	-0.811896	-1.06537	Not Interesting
g10950	NA	0.57531	1.61243	Not Interesting
g10955	sp|B3EWZ3|CADN_ACRMI	0.582486	0.659996	Not Interesting
g1096	sp|Q63429|UBC_RAT	0.41654	0.465542	Not Interesting
g10961	sp|Q9CYL5|GAPR1_MOUSE	3.17732	2.89323	Not Interesting
g10967	NA	1.35609	1.9846	Not Interesting
g10986	NA	0.503109	0.898326	Not Interesting
g11021	sp|O76075|DFFB_HUMAN	1.1713	1.42841	Not Interesting
g11058	sp|C4R7Z3|C9MT_KOMPG	0.440165	0.352261	Not Interesting
g11062	sp|Q9H4G4|GAPR1_HUMAN	0.911942	0.822323	Not Interesting
g11095	sp|P97494|GSH1_MOUSE	-0.483045	-0.709183	Not Interesting
g11106	NA	-0.552669	-0.817071	Not Interesting
g11134	NA	0.983985	0.870156	Not Interesting
g11204	sp|Q54TR1|CFAD_DICDI	-0.449341	-0.439431	Not Interesting
g1125	sp|Q00G26|PLIN5_HUMAN	0.943308	1.29664	Not Interesting
g11351	sp|Q7SIB2|CO4A1_BOVIN	1.07983	1.24511	Not Interesting
g11352	sp|P08120|CO4A1_DROME	1.08669	1.24229	Not Interesting
g11353	sp|Q4ZJM7|OTOL1_MOUSE	1.11397	1.27221	Not Interesting
g11354	sp|P05099|MATN1_CHICK	1.20857	1.39798	Not Interesting
g11355	sp|P27393|CO4A2_ASCSU	1.20384	1.33367	Not Interesting
g11358	NA	1.22261	0.613095	Not Interesting
g11363	sp|P35520|CBS_HUMAN	1.08963	1.15551	Not Interesting
g11398	sp|Q7SXW3|LRC40_DANRE	0.351762	0.66168	Not Interesting
g11444	sp|Q9H7M6|ZSWM4_HUMAN	-0.954631	1.26665	Head
g11446	NA	-0.504169	-0.729743	Not Interesting
g11469	NA	0.209154	0.493322	Not Interesting
g11470	sp|Q96LW9|ZSC31_HUMAN	0.64332	1.31162	Not Interesting
g11471	sp|P24044|CALM_PLAFA	0.782851	0.895894	Not Interesting
g11487	NA	-0.444554	-0.740964	Not Interesting
g11501	NA	0.136615	1.02323	Not Interesting
g11528	sp|P02466|CO1A2_RAT	0.641219	0.455221	Not Interesting
g11588	NA	-1.40649	-1.68739	Not Interesting
g11692	sp|Q9JJC6|RIPL1_MOUSE	0.376166	0.454989	Not Interesting
g11696	sp|P39921|TPM1_HYDVU	0.44922	0.527713	Not Interesting
g11697	sp|P55112|NAS4_CAEEL	0.254352	0.437787	Not Interesting
g11698	sp|P55112|NAS4_CAEEL	1.80233	2.49139	Not Interesting
g11714	sp|Q9HCF6|TRPM3_HUMAN	-0.494044	-0.382024	Not Interesting
g11718	NA	-0.0941103	1.10342	Not Interesting
g1174	sp|O15230|LAMA5_HUMAN	-0.464453	-0.777368	Not Interesting
g11745	sp|Q90623|MYPT1_CHICK	-0.180611	0.868079	Head
g1176	sp|P07942|LAMB1_HUMAN	-0.282519	-0.452949	Not Interesting
g11765	sp|P54366|GSC_DROME	-0.766096	-0.859766	Not Interesting
g11780	sp|Q62445|SP4_MOUSE	-0.340459	-1.60273	Foot
g11880	sp|Q17RW2|COOA1_HUMAN	0.812458	0.268569	Not Interesting
g11950	sp|Q8CFH6|SIK2_MOUSE	-0.149788	0.766002	Head
g11978	sp|Q5EA92|AL14E_BOVIN	-0.924124	-1.48441	Not Interesting
g1199	sp|P42674|BP10_PARLI	1.11852	1.06218	Not Interesting
g11994	NA	1.1115	1.7246	Not Interesting
g11996	sp|A5PN43|TM175_DANRE	1.0829	1.37761	Not Interesting
g12040	NA	0.476149	1.63902	Not Interesting
g12061	sp|Q08DQ2|GFPT2_BOVIN	1.04562	1.2062	Not Interesting
g12120	sp|P50280|MMP7_RAT	0.488766	0.393742	Not Interesting
g12223	sp|D3ZDI6|MYLIP_RAT	-0.559334	-0.131472	Not Interesting
g12231	sp|P81439|EQST_ACTEQ	-0.462535	-0.68349	Not Interesting
g12236	NA	1.56613	2.71653	Not Interesting
g12259	sp|Q80ZF8|AGRB3_MOUSE	-0.967021	-0.986556	Not Interesting
g12274	sp|G5ECQ2|FRIZ2_CAEEL	0.879524	2.07638	Head
g12277	sp|Q5SRI9|MANEA_HUMAN	0.434118	0.563612	Not Interesting
g12280	sp|Q6TGY8|EMC2_DANRE	0.616248	0.497439	Not Interesting
g12434	sp|A4GTP4|ELK1_RAT	2.0473	1.73139	Not Interesting
g12439	sp|P41969|ELK1_MOUSE	2.95875	0.90267	Not Interesting
g12440	NA	1.8769	0.301707	Not Interesting
g12447	sp|A4GTP4|ELK1_RAT	0.533416	0.680318	Not Interesting
g12458	sp|P0C548|PLPL2_RAT	-0.363637	-1.10867	Not Interesting
g12461	sp|O18405|SURF4_DROME	0.336922	0.263997	Not Interesting
g12471	NA	0.496336	0.785301	Not Interesting
g1253	NA	5.23088	5.02264	Not Interesting
g1254	NA	3.55128	2.818	Not Interesting
g12567	sp|P48430|SOX2_CHICK	0.736623	1.90399	Not Interesting
g12568	NA	0.423064	0.380562	Not Interesting
g12571	sp|Q17QJ5|TSN5_BOVIN	0.276501	0.434807	Not Interesting
g12585	sp|A2AVA0|SVEP1_MOUSE	0.446942	0.535844	Not Interesting
g12639	NA	-0.371192	-0.617927	Not Interesting
g12706	sp|Q539E5|APX1_HYDVD	1.0901	0.581456	Not Interesting
g12710	sp|P35283|RAB12_MOUSE	0.646767	2.43563	Head
g12732	sp|Q8CIS0|CAR11_MOUSE	0.539045	0.97527	Not Interesting
g1275	sp|P27918|PROP_HUMAN	1.09591	0.691674	Not Interesting
g1276	sp|Q96RW7|HMCN1_HUMAN	1.21392	0.770199	Not Interesting
g12783	sp|Q9ULC3|RAB23_HUMAN	0.701065	0.76018	Not Interesting
g1279	NA	1.11228	0.768315	Not Interesting
g12795	NA	-0.786477	-0.795	Not Interesting
g12822	NA	0.0313219	0.689505	Not Interesting
g12875	NA	-0.217655	-0.466507	Not Interesting
g12884	sp|P80513|MANF_BOVIN	0.975443	1.05685	Not Interesting
g12951	NA	-0.0242746	1.61502	Not Interesting
g12992	sp|P69478|CHSTB_RAT	1.47701	2.16685	Not Interesting
g1301	NA	0.568537	1.29751	Not Interesting
g13019	sp|P16273|PRPX_HORVU	1.43935	-0.195364	Not Interesting
g13020	sp|P16273|PRPX_HORVU	0.876107	0.292126	Not Interesting
g13058	sp|H6BDU4|SODC_CAMDR	0.917739	1.08931	Not Interesting
g13063	NA	-0.412274	-0.580319	Not Interesting
g1320	sp|Q8K007|SULF1_MOUSE	-0.298231	0.604849	Not Interesting
g13212	sp|Q9Y6L7|TLL2_HUMAN	-0.573855	-0.81992	Not Interesting
g13225	sp|O43172|PRP4_HUMAN	0.429496	0.444741	Not Interesting
g13247	sp|Q9KWN0|AHV_ACTSK	1.25752	1.67258	Not Interesting
g13250	sp|Q9KWN0|AHV_ACTSK	0.925908	1.41336	Not Interesting
g13307	sp|P41252|SYIC_HUMAN	0.380719	0.444617	Not Interesting
g13309	sp|P41252|SYIC_HUMAN	0.326174	0.43191	Not Interesting
g13331	sp|A0A0R4IBK5|R213A_DANRE	-0.614121	-0.367257	Not Interesting
g13376	sp|Q9GLY5|ITIH3_RABIT	0.259654	0.448357	Not Interesting
g1338	sp|Q9GNN8|CTXA_CARAL	-0.557417	-0.695653	Not Interesting
g13448	sp|Q08759|MYB_XENLA	-0.290353	-0.445415	Not Interesting
g13514	sp|Q9BX10|GTPB2_HUMAN	1.49347	1.54024	Not Interesting
g13544	sp|O08992|SDCB1_MOUSE	0.403527	0.486974	Not Interesting
g13587	sp|Q64121|PRLHR_RAT	-1.4549	0.56993	Head
g13619	NA	2.69201	4.17552	Not Interesting
g13748	NA	-0.873852	-0.715601	Not Interesting
g13749	sp|Q8WXH0|SYNE2_HUMAN	-0.650889	-0.486824	Not Interesting
g13759	sp|Q9UNL2|SSRG_HUMAN	0.442329	0.36961	Not Interesting
g13799	NA	-3.0771	-0.562935	Not Interesting
g13801	sp|Q5UQ60|YL662_MIMIV	0.961676	1.0927	Not Interesting
g13803	sp|Q6ING7|FLAD1_XENLA	0.584848	0.617234	Not Interesting
g13929	sp|Q5RA22|5NTC_PONAB	0.469815	0.353692	Not Interesting
g14000	sp|Q00174|LAMA_DROME	0.49852	0.38069	Not Interesting
g14018	sp|Q15063|POSTN_HUMAN	-1.09399	-3.07758	Not Interesting
g14048	sp|Q9UIK4|DAPK2_HUMAN	0.581673	0.930372	Not Interesting
g14107	sp|A8GCA7|RIMK_SERP5	0.757158	0.930015	Not Interesting
g14213	NA	1.08868	1.26676	Not Interesting
g14220	NA	3.98191	3.32696	Not Interesting
g14229	sp|Q9H772|GREM2_HUMAN	-0.269059	1.31707	Head
g14239	sp|Q9Y6W6|DUS10_HUMAN	0.368253	0.581376	Not Interesting
g143	sp|Q8BG58|P4HTM_MOUSE	-0.398778	-0.474862	Not Interesting
g1435	NA	-0.460806	-0.465165	Not Interesting
g14380	sp|O77775|NCF2_BOVIN	-0.622096	-0.186919	Not Interesting
g14383	NA	0.374477	0.454358	Not Interesting
g1439	NA	-0.184101	-0.946551	Not Interesting
g14402	sp|Q6DG32|S2536_DANRE	0.315042	0.622729	Not Interesting
g14470	sp|P53690|MMP14_MOUSE	3.53332	4.59923	Not Interesting
g14473	NA	-0.587576	-0.523383	Not Interesting
g1450	sp|P18870|JUN_CHICK	-0.183385	0.639373	Head
g14502	sp|Q9BW91|NUDT9_HUMAN	0.390554	0.328622	Not Interesting
g14514	NA	-0.678546	-0.50145	Not Interesting
g1460	sp|Q9DBU3|RIOK3_MOUSE	0.711511	0.799067	Not Interesting
g1461	NA	0.543302	2.19046	Not Interesting
g14675	NA	-0.668992	-1.02989	Not Interesting
g14685	sp|Q08E39|SPY2_BOVIN	-0.559055	0.357529	Head
g14688	sp|Q54TL0|KIF7_DICDI	0.231598	0.684796	Not Interesting
g14694	sp|Q6GNJ8|VPS72_XENLA	0.232283	0.398919	Not Interesting
g14708	NA	0.627367	0.232662	Not Interesting
g1473	sp|Q5USW0|GDF8_TAUDE	-0.950504	-0.871388	Not Interesting
g14746	sp|Q9H324|ATS10_HUMAN	-0.645166	-0.746207	Not Interesting
g14799	sp|Q86TX2|ACOT1_HUMAN	1.18459	1.16062	Not Interesting
g14800	sp|Q8CGB3|UACA_MOUSE	0.546301	1.13662	Not Interesting
g14801	sp|Q80WQ9|ZBED4_MOUSE	0.384888	0.763558	Not Interesting
g14855	NA	-0.662574	-1.18744	Not Interesting
g14866	sp|P25931|NPYR_DROME	-1.27173	-1.00746	Not Interesting
g14912	NA	1.28459	0.498574	Not Interesting
g14938	sp|O15169|AXIN1_HUMAN	0.485003	1.62712	Head
g14978	NA	1.03312	1.23483	Not Interesting
g14987	sp|Q569D5|SBP1_XENTR	0.440774	0.429429	Not Interesting
g15	sp|P49355|FNTB_BOVIN	0.48609	0.540198	Not Interesting
g15015	sp|P22757|HE_PARLI	0.457513	0.740146	Not Interesting
g15069	sp|Q0VA16|WDR70_XENTR	0.490777	0.357523	Not Interesting
g15095	sp|P19440|GGT1_HUMAN	-0.415283	-0.449821	Not Interesting
g15120	sp|Q9CWS0|DDAH1_MOUSE	-0.548805	-0.969445	Not Interesting
g15129	sp|P32020|NLTP_MOUSE	0.70179	0.404875	Not Interesting
g15133	sp|Q6MG82|PRRT1_RAT	0.577239	0.650568	Not Interesting
g15165	sp|P58058|NADK_MOUSE	0.72425	0.705453	Not Interesting
g15181	sp|Q3SZE3|PLPP3_BOVIN	0.324103	1.05076	Not Interesting
g15185	sp|Q95334|AMPE_PIG	1.0341	0.752561	Not Interesting
g15226	sp|A6YP92|ARX_RAT	-0.28985	1.14748	Head
g15293	sp|Q98TB4|GDF8_OREMO	-1.13638	-0.772959	Not Interesting
g15359	sp|O60481|ZIC3_HUMAN	-0.550928	-0.262047	Not Interesting
g15375	NA	-0.380678	-0.338707	Not Interesting
g15387	sp|Q566X8|DMX1B_DANRE	-0.433441	-0.833823	Not Interesting
g1539	NA	-0.347671	-0.558654	Not Interesting
g15442	NA	0.297648	0.395908	Not Interesting
g15451	sp|P47799|FSHR_HORSE	2.86875	1.72664	Not Interesting
g15457	sp|O35815|ATX3_RAT	1.09128	1.07032	Not Interesting
g15458	sp|B2LU20|SFXN1_SHEEP	1.1716	1.14951	Not Interesting
g15493	sp|Q8VHI3|OFUT2_MOUSE	0.424452	0.220405	Not Interesting
g15494	sp|Q8N2E2|VWDE_HUMAN	0.474066	2.21967	Head
g15578	NA	-0.527144	-0.558106	Not Interesting
g15590	sp|P91953|HE_HEMPU	0.401864	0.666846	Not Interesting
g15603	sp|Q9QYF1|RDH11_MOUSE	0.412972	0.541892	Not Interesting
g15629	sp|P18519|TNR16_CHICK	0.39282	0.556718	Not Interesting
g15630	sp|H2A0N9|KCP4_PINMG	3.19549	3.12343	Not Interesting
g15640	sp|Q9YIB7|ZIC2B_XENLA	-0.257149	-0.556413	Not Interesting
g15667	sp|P54001|P4HA1_RAT	-0.262925	-0.362794	Not Interesting
g15668	sp|P10079|FBP1_STRPU	-0.473562	-0.441019	Not Interesting
g15679	NA	-0.0274431	0.560157	Not Interesting
g15773	NA	-0.0479001	0.677991	Not Interesting
g15775	NA	-0.995713	-0.608696	Not Interesting
g15894	sp|B5ZYI7|DUT_RHILW	2.23477	1.0828	Not Interesting
g15913	sp|Q63ZI0|KCNK9_XENLA	0.908809	2.87495	Not Interesting
g15952	NA	0.755751	1.25705	Not Interesting
g15980	sp|Q8IVL0|NAV3_HUMAN	-0.329998	-0.64775	Not Interesting
g16071	sp|Q9LVK9|ALA7_ARATH	0.41261	0.602326	Not Interesting
g1608	sp|P98155|VLDLR_HUMAN	0.403454	0.251849	Not Interesting
g16165	sp|Q61467|ZIC4_MOUSE	0.960555	3.92379	Head
g16168	sp|Q90593|GRP78_CHICK	1.39945	1.40642	Not Interesting
g16204	sp|D3YXG0|HMCN1_MOUSE	1.18599	1.36938	Not Interesting
g16227	sp|Q64077|NK2R_CAVPO	-0.468647	-0.910878	Not Interesting
g1624	sp|Q61115|PTC1_MOUSE	0.823224	1.00657	Not Interesting
g16330	sp|P48723|HSP13_HUMAN	0.562557	0.510601	Not Interesting
g1642	sp|A5PJM7|DEFI8_BOVIN	-0.798079	-0.603247	Not Interesting
g16431	sp|Q9P2N4|ATS9_HUMAN	1.37529	1.03145	Not Interesting
g16491	sp|P51984|CREB_HYDVD	0.230018	0.948018	Not Interesting
g16493	NA	2.1741	5.10891	Not Interesting
g16500	sp|P46824|KLC_DROME	0.0322535	-0.960203	Not Interesting
g16557	sp|Q09604|VAB15_CAEEL	-2.44446	-1.36216	Not Interesting
g16717	sp|P58478|HTPG_RICCN	-0.589195	-0.454647	Not Interesting
g16788	NA	-0.485462	-0.680991	Not Interesting
g16805	sp|O75445|USH2A_HUMAN	-0.661036	-0.459871	Not Interesting
g16877	sp|E3PY99|ORD_CLOSD	0.481177	0.622563	Not Interesting
g16879	sp|Q9VSF3|UBC12_DROME	0.838273	0.280048	Not Interesting
g16882	NA	2.58617	3.01307	Not Interesting
g1696	sp|O95490|AGRL2_HUMAN	-0.379155	-0.79184	Not Interesting
g16973	sp|Q6WZ18|NGB_CANLF	1.27373	3.96531	Not Interesting
g1705	sp|Q8N8A2|ANR44_HUMAN	0.883035	1.96183	Not Interesting
g1718	sp|P69478|CHSTB_RAT	2.60753	3.60373	Not Interesting
g17202	sp|P70191|TRAF5_MOUSE	0.519517	0.522349	Not Interesting
g17212	sp|Q18297|TRPA1_CAEEL	-0.546979	-0.713257	Not Interesting
g17270	sp|P00630|PA2_APIME	-0.8129	-1.02979	Not Interesting
g17348	sp|A0A0K3AWM6|MOM5_CAEEL	-1.59286	-1.2128	Not Interesting
g17349	sp|P62293|ASPM_PANTR	-1.46692	-1.23646	Not Interesting
g17371	sp|Q5F408|SYCC_CHICK	0.467811	0.534702	Not Interesting
g17372	sp|P55268|LAMB2_HUMAN	-0.590287	-0.735482	Not Interesting
g1743	sp|Q16363|LAMA4_HUMAN	0.777793	0.922252	Not Interesting
g17465	sp|Q9H8Y8|GORS2_HUMAN	0.5753	0.575322	Not Interesting
g17469	NA	0.349215	0.890256	Not Interesting
g17476	NA	-0.946189	-0.889526	Not Interesting
g17479	sp|Q3UHD1|BAI1_MOUSE	0.72095	0.390616	Not Interesting
g17506	sp|P54707|AT12A_HUMAN	6.86364	6.6957	Not Interesting
g17635	sp|Q18297|TRPA1_CAEEL	-0.463302	-0.436936	Not Interesting
g17667	sp|Q3UGY8|BIG3_MOUSE	-0.420703	-0.558916	Not Interesting
g1771	sp|Q9VYN8|TENA_DROME	0.995976	0.812337	Not Interesting
g17730	sp|Q8N2M4|TM86A_HUMAN	-0.441506	-0.434051	Not Interesting
g17774	sp|Q5BLE8|RETST_DANRE	0.709174	0.704527	Not Interesting
g17795	sp|Q61847|MEP1B_MOUSE	0.777942	0.828291	Not Interesting
g1782	sp|P35668|GSHB_XENLA	-0.313743	-0.517114	Not Interesting
g17848	sp|Q92481|AP2B_HUMAN	-1.09134	-0.67334	Not Interesting
g17880	sp|Q2PFN5|SPY2_MACFA	0.900044	0.810246	Not Interesting
g17891	sp|Q93YS4|AB22G_ARATH	0.507808	0.42886	Not Interesting
g17908	sp|Q75N90|FBN3_HUMAN	0.237989	0.65056	Not Interesting
g17917	sp|Q27052|FCA1_TRYRA	-0.564246	0.121018	Not Interesting
g17928	NA	0.446025	0.400542	Not Interesting
g17949	sp|Q7Z494|NPHP3_HUMAN	-0.842727	-1.31404	Not Interesting
g17979	sp|P02510|CRYAB_BOVIN	0.730588	1.19608	Not Interesting
g17982	sp|P02510|CRYAB_BOVIN	0.810748	0.585659	Not Interesting
g17988	sp|P02510|CRYAB_BOVIN	0.653649	1.44486	Not Interesting
g17998	sp|P02510|CRYAB_BOVIN	1.28135	1.44781	Not Interesting
g18016	sp|Q11126|FUT3_BOVIN	-1.78386	-2.15208	Not Interesting
g18017	sp|Q11128|FUT5_HUMAN	0.465872	0.616487	Not Interesting
g18022	NA	0.501107	0.46777	Not Interesting
g18029	NA	0.489326	0.53968	Not Interesting
g181	sp|Q60738|ZNT1_MOUSE	0.32571	0.95713	Not Interesting
g18200	sp|Q99578|RIT2_HUMAN	-0.207784	0.986868	Head
g18215	sp|Q9BQS2|SYT15_HUMAN	0.516171	0.986512	Not Interesting
g18277	sp|Q9H4G4|GAPR1_HUMAN	1.04819	0.83106	Not Interesting
g18285	NA	-1.48811	-1.8751	Not Interesting
g18299	sp|P10079|FBP1_STRPU	-0.255425	-0.672765	Not Interesting
g18303	sp|P10079|FBP1_STRPU	-0.435783	-0.547906	Not Interesting
g18321	NA	0.583272	0.738227	Not Interesting
g18331	NA	0.481914	0.705242	Not Interesting
g1834	sp|Q5NVI9|DNJA1_PONAB	0.335818	0.374391	Not Interesting
g18373	NA	0.937781	0.629943	Not Interesting
g18439	NA	-0.451406	-0.932729	Not Interesting
g18466	sp|P07524|TYRO_STRAT	7.23095	8.16584	Not Interesting
g18477	sp|Q5TJ56|FORF_DICDI	-0.50085	-0.926397	Not Interesting
g18524	NA	-0.494477	-0.444869	Not Interesting
g18525	sp|O15014|ZN609_HUMAN	-0.57363	-0.51151	Not Interesting
g18549	NA	0.504692	0.435075	Not Interesting
g1858	sp|Q2Z1R2|SOX1B_DANRE	-0.997924	-0.722942	Not Interesting
g18690	sp|O75762|TRPA1_HUMAN	-0.449129	-0.837853	Not Interesting
g18700	sp|Q9QXM0|ABHD2_MOUSE	0.560837	0.664217	Not Interesting
g18717	NA	-0.579075	-0.389024	Not Interesting
g18735	sp|A7Y2W8|SC6A9_XENLA	-0.502625	-0.488529	Not Interesting
g18737	sp|Q6NVD0|FREM2_MOUSE	0.732519	1.18318	Not Interesting
g18743	sp|Q5SZK8|FREM2_HUMAN	0.993654	1.02542	Not Interesting
g18779	sp|Q61041|NPY4R_MOUSE	-1.52277	-2.04588	Not Interesting
g18842	sp|Q6DID7|WLS_MOUSE	2.68334	3.37637	Not Interesting
g18947	sp|Q8NB14|UBP38_HUMAN	0.58621	0.767646	Not Interesting
g18951	sp|P38571|LICH_HUMAN	1.42456	1.50252	Not Interesting
g18952	sp|O15072|ATS3_HUMAN	0.407671	0.278243	Not Interesting
g18982	sp|P34908|BRAF_COTJA	-0.680573	-0.716237	Not Interesting
g18986	sp|P15056|BRAF_HUMAN	-0.583419	-0.534921	Not Interesting
g19012	sp|Q7LL04|YQK1_SCHPO	0.399188	0.884033	Not Interesting
g19215	NA	-0.908324	-0.51386	Not Interesting
g19216	sp|Q6GQB9|EDEM3_XENLA	0.432785	0.529	Not Interesting
g19230	sp|Q9EQX4|AIF1L_MOUSE	0.441227	0.40962	Not Interesting
g19253	sp|P47728|CALB2_RAT	-0.704405	0.346201	Head
g19275	sp|Q6NSM8|SIK3_DANRE	-0.446263	-0.540177	Not Interesting
g19288	sp|Q967D7|TUTL_DROME	0.220214	0.469412	Not Interesting
g19310	sp|Q01262|HYUA_PSESN	0.665359	0.996542	Not Interesting
g19355	NA	0.762255	1.80862	Not Interesting
g19363	sp|Q32NH8|PLCD4_XENLA	0.905329	0.509066	Not Interesting
g194	sp|Q59536|PTRB_MORLA	-0.507939	-0.607938	Not Interesting
g19401	sp|Q9JI85|NUCB2_RAT	0.568492	0.614513	Not Interesting
g19404	sp|Q15058|KIF14_HUMAN	-0.598573	-0.676165	Not Interesting
g1942	sp|Q6DHR8|NGBR_DANRE	0.586989	0.324007	Not Interesting
g19421	sp|O08629|TIF1B_RAT	-0.549065	-0.78805	Not Interesting
g19422	NA	-0.42863	-0.655219	Not Interesting
g19496	sp|P63255|CRIP1_RAT	1.11099	1.40185	Not Interesting
g19531	NA	1.04266	1.637	Not Interesting
g19567	sp|Q9R0U0|SRS10_MOUSE	0.409569	0.422144	Not Interesting
g19568	NA	6.25809	5.23548	Not Interesting
g19677	sp|A7RWD2|CIAO1_NEMVE	0.574372	0.535509	Not Interesting
g19703	sp|A0A0R4IBK5|R213A_DANRE	-0.861398	-1.03579	Not Interesting
g1973	sp|Q52KG5|KI26A_MOUSE	0.263398	0.564178	Not Interesting
g19768	sp|P32254|RASS_DICDI	0.561556	1.45442	Head
g19890	NA	-0.543045	1.09453	Head
g19927	sp|P06727|APOA4_HUMAN	2.30071	3.35405	Not Interesting
g19973	sp|P91953|HE_HEMPU	0.54396	1.0696	Not Interesting
g19975	sp|Q54RZ7|Y1199_DICDI	-0.396057	-0.608618	Not Interesting
g19984	sp|Q02225|SKI_XENLA	-0.639564	-0.128439	Not Interesting
g19992	sp|Q5SVZ6|ZMYM1_HUMAN	0.582757	1.86151	Not Interesting
g19993	sp|Q4R3D6|ZMYM5_MACFA	0.42567	4.70131	Not Interesting
g20012	NA	2.31841	3.08198	Not Interesting
g20037	NA	0.324165	1.67468	Not Interesting
g2004	sp|Q6NUX8|RHOAA_DANRE	0.575296	0.714858	Not Interesting
g20050	sp|O41033|DUT_PBCV1	0.0683938	0.927189	Not Interesting
g20083	sp|O57525|CP17A_RANDY	2.07215	2.79543	Not Interesting
g20086	sp|Q19849|EGL44_CAEEL	-0.354271	-0.567185	Not Interesting
g20096	NA	0.552153	0.70088	Not Interesting
g2010	sp|O94827|PKHG5_HUMAN	0.709505	0.579973	Not Interesting
g2011	sp|O94827|PKHG5_HUMAN	0.698389	0.817255	Not Interesting
g20117	NA	0.317902	0.457755	Not Interesting
g2028	NA	0.62802	0.946391	Not Interesting
g20340	NA	0.703847	0.457609	Not Interesting
g20349	sp|P64922|Y2028_MYCBO	0.500725	0.825033	Not Interesting
g2038	sp|P35400|GRM7_RAT	0.171177	-0.672496	Not Interesting
g20537	sp|Q08790|BLC_VIBCH	0.642658	1.03481	Not Interesting
g20552	sp|K7Z9Q9|VMP_NEMVE	0.525929	0.729584	Not Interesting
g20553	sp|P31579|LCE_ORYLA	0.428816	0.730156	Not Interesting
g2061	sp|Q8VHN7|GPR98_MOUSE	-0.5133	-0.455469	Not Interesting
g20613	NA	-0.110531	0.979153	Not Interesting
g20637	sp|A2VDZ3|MEF2A_BOVIN	-0.39921	-0.479138	Not Interesting
g2068	NA	-0.164423	0.759876	Head
g20685	sp|P47032|PRY1_YEAST	0.515836	0.608921	Not Interesting
g20686	NA	-0.452994	-0.512593	Not Interesting
g20690	sp|Q6TXF1|ARRD3_RAT	0.893251	1.38935	Not Interesting
g20700	sp|Q7TPQ9|ARRD3_MOUSE	0.474443	0.354031	Not Interesting
g20769	sp|P78412|IRX6_HUMAN	-0.342832	-0.693517	Not Interesting
g20774	sp|Q55874|Y103_SYNY3	1.33717	1.71246	Not Interesting
g20792	sp|Q8IVN8|SBSPO_HUMAN	2.51203	2.74023	Not Interesting
g20826	sp|Q2VLG6|C163A_CANLF	0.517484	0.845489	Not Interesting
g20832	sp|Q95218|DMBT1_RABIT	1.65126	1.68595	Not Interesting
g20857	sp|A6QLU6|AGRD1_BOVIN	-0.582318	-0.804955	Not Interesting
g20911	sp|P23770|GATA2_XENLA	-0.649659	-1.7388	Not Interesting
g20918	sp|P35360|OPSL_LIMPO	-0.547932	-0.674473	Not Interesting
g20991	sp|P46088|GST_NOTSL	1.07094	1.55148	Not Interesting
g20995	sp|P46088|GST_NOTSL	1.0864	0.785037	Not Interesting
g21006	sp|Q9U518|ASPG_DIRIM	0.131259	-1.31309	Foot
g21025	NA	-0.364387	-0.433549	Not Interesting
g21055	sp|Q29RV1|PDIA4_BOVIN	0.720387	0.754894	Not Interesting
g21056	sp|Q29RV1|PDIA4_BOVIN	0.72922	0.701695	Not Interesting
g21065	sp|Q5R9A4|DNJB9_PONAB	0.917732	1.04932	Not Interesting
g21066	NA	-0.941163	-0.114904	Not Interesting
g21076	sp|A4IIJ3|KIBRA_XENTR	-0.347986	0.559355	Head
g21088	sp|Q16720|AT2B3_HUMAN	0.484136	0.147214	Not Interesting
g21095	sp|Q6IE82|JADE3_MOUSE	-0.444045	-0.377556	Not Interesting
g2111	sp|Q80VL3|PRIC3_MOUSE	-0.104916	-0.347793	Not Interesting
g21163	NA	0.66595	-0.324397	Foot
g21174	sp|P43368|CAN3_PIG	0.282457	1.00203	Not Interesting
g21219	sp|Q90623|MYPT1_CHICK	2.21014	1.77147	Not Interesting
g21247	sp|A0A0R4IBK5|R213A_DANRE	-0.676432	-0.745893	Not Interesting
g21254	sp|A0A0R4IBK5|R213A_DANRE	-0.763396	-0.568688	Not Interesting
g21270	sp|Q0V7M1|KPSH1_BOVIN	0.159158	0.972363	Not Interesting
g21488	sp|O57422|OPN4B_XENLA	-1.15642	-1.01193	Not Interesting
g21491	sp|P30974|TLR1_DROME	-1.12822	-0.248056	Not Interesting
g21616	NA	2.84184	2.36502	Not Interesting
g21702	sp|Q8CIW6|S26A6_MOUSE	0.603459	0.806821	Not Interesting
g21713	sp|Q8CIW6|S26A6_MOUSE	0.614914	0.86979	Not Interesting
g21760	sp|P55112|NAS4_CAEEL	0.311258	0.579336	Not Interesting
g21761	sp|Q9Y5R5|DMRT2_HUMAN	-1.44975	1.5612	Head
g21772	NA	-0.708194	-1.29754	Not Interesting
g21798	sp|Q8BGF8|S35D3_MOUSE	0.370848	0.814847	Not Interesting
g2189	NA	-1.05483	-0.514711	Not Interesting
g2192	sp|Q8TE12|LMX1A_HUMAN	-1.02285	-0.566278	Not Interesting
g21976	sp|O95057|DIRA1_HUMAN	0.375826	0.642426	Not Interesting
g2198	sp|Q8N8K9|K1958_HUMAN	-0.915507	-1.86136	Not Interesting
g22025	sp|Q75M08|PDI21_ORYSJ	-0.556732	-0.688305	Not Interesting
g22058	sp|P10079|FBP1_STRPU	-0.464134	-0.570559	Not Interesting
g22086	sp|Q5XGS8|GTPB1_XENLA	0.998491	1.15916	Not Interesting
g22087	sp|Q5XGS8|GTPB1_XENLA	0.993636	1.34877	Not Interesting
g22088	sp|D2XV59|GTPB1_RAT	0.971183	1.21896	Not Interesting
g22100	sp|Q4KM30|DESI1_RAT	0.986372	0.848958	Not Interesting
g22112	sp|Q91Z92|B3GT6_MOUSE	0.573927	0.710959	Not Interesting
g22114	NA	1.72516	3.08823	Head
g22132	NA	0.486393	0.591257	Not Interesting
g22137	sp|P50129|5HT2A_PIG	-0.256505	-1.10173	Not Interesting
g22186	sp|Q91175|ADA1A_ORYLA	-0.37068	-0.784819	Not Interesting
g22197	sp|P07805|DCOR_TRYBB	1.24839	1.63406	Not Interesting
g22221	NA	-0.354442	-0.627807	Not Interesting
g22226	sp|P21369|PNCA_ECOLI	-1.04676	-1.02313	Not Interesting
g22258	sp|Q62165|DAG1_MOUSE	0.479815	0.465025	Not Interesting
g22286	sp|B3VSC2|TSN9_SHEEP	0.333556	0.483969	Not Interesting
g22317	sp|Q0VCJ7|RERG_BOVIN	1.29023	2.03794	Not Interesting
g22319	sp|Q7T163|KDIS_DANRE	-0.182404	-0.541194	Not Interesting
g22348	NA	-0.434423	-1.0157	Not Interesting
g22533	sp|Q9BQE3|TBA1C_HUMAN	-0.592431	0.0162518	Not Interesting
g22555	sp|P07942|LAMB1_HUMAN	0.825047	0.822995	Not Interesting
g22557	sp|Q61116|ZN235_MOUSE	0.45048	0.57117	Not Interesting
g22585	sp|Q91Z46|DUS7_MOUSE	0.209677	0.884098	Not Interesting
g22615	sp|Q8HYJ7|FUT5_GORGO	0.426732	0.803292	Not Interesting
g22655	sp|Q63690|BAX_RAT	0.283831	0.416008	Not Interesting
g2266	NA	-0.77467	-0.780407	Not Interesting
g22665	sp|Q9ES87|PRSS8_RAT	0.60147	0.641738	Not Interesting
g22680	sp|Q3E6S9|CNIF3_ARATH	0.348192	0.275038	Not Interesting
g22718	sp|P11845|IPP2_RABIT	0.550852	0.582315	Not Interesting
g2273	NA	0.673274	0.542232	Not Interesting
g22734	sp|P11279|LAMP1_HUMAN	0.38809	0.415753	Not Interesting
g2274	NA	2.07871	2.40772	Not Interesting
g22822	NA	0.272521	-0.985588	Not Interesting
g22852	sp|Q5TAX3|TUT4_HUMAN	-0.411052	-0.497684	Not Interesting
g22869	NA	-0.684965	0.00705922	Not Interesting
g22879	sp|Q8WWF8|CAPSL_HUMAN	0.593028	0.486547	Not Interesting
g2288	NA	-0.634054	-0.924785	Not Interesting
g22916	sp|P85857|GDF6A_DANRE	0.727716	0.61882	Not Interesting
g22919	sp|Q5SPC5|OTOF_DANRE	-1.08792	-0.845747	Not Interesting
g22933	sp|Q9NR82|KCNQ5_HUMAN	-0.512892	-0.83334	Not Interesting
g22934	NA	1.54529	3.3121	Head
g22990	sp|Q32PV0|GULP1_DANRE	0.13792	0.416217	Not Interesting
g23047	sp|P97819|PLPL9_MOUSE	0.496465	0.114108	Not Interesting
g23048	sp|P97570|PLPL9_RAT	0.401798	0.619766	Not Interesting
g23069	NA	-0.334403	-0.77698	Not Interesting
g23079	NA	1.90064	2.46325	Not Interesting
g23088	sp|A2AJ15|MA1B1_MOUSE	0.439722	0.448352	Not Interesting
g23103	NA	-0.11212	-0.704645	Not Interesting
g23108	sp|Q6L9W6|B4GN3_HUMAN	-0.30882	-0.567062	Not Interesting
g23109	NA	0.0972201	0.588735	Not Interesting
g23186	NA	0.667167	0.940486	Not Interesting
g23193	sp|P19246|NFH_MOUSE	-0.719649	-0.778158	Not Interesting
g23249	NA	0.158359	0.708271	Not Interesting
g23252	sp|P23508|CRCM_HUMAN	0.0775139	0.685542	Not Interesting
g23270	sp|Q7ZTV5|FSHR_CAIMO	-0.534539	0.0193111	Not Interesting
g2328	sp|P54864|JUN_SERCA	-0.452283	-0.509661	Not Interesting
g23304	sp|Q8CHN8|MASP1_RAT	0.765401	1.08935	Not Interesting
g23347	sp|Q29243|DAG1_PIG	-0.724959	-0.965099	Not Interesting
g23352	NA	-0.643152	-0.464246	Not Interesting
g23370	sp|Q9H4G4|GAPR1_HUMAN	-0.560682	-0.595292	Not Interesting
g23371	sp|Q9CYL5|GAPR1_MOUSE	-0.719713	-0.693824	Not Interesting
g234	sp|P05933|CALM_SCHPO	2.16601	2.48199	Not Interesting
g23416	sp|Q7YRZ9|MCL1_FELCA	-0.801095	-0.147888	Not Interesting
g23418	sp|Q99L28|RLP24_MOUSE	0.457008	0.352456	Not Interesting
g23421	sp|Q82P90|IABF_STRAW	2.55586	3.46565	Not Interesting
g23426	NA	-0.609347	-0.503732	Not Interesting
g23429	sp|A3DEX6|RSGI5_CLOTH	-0.668909	-0.599797	Not Interesting
g23571	NA	0.0382695	0.565123	Not Interesting
g23588	sp|Q61382|TRAF4_MOUSE	-0.786726	0.796965	Head
g23600	sp|E7FKV8|PK1L1_ORYLA	-0.95246	-0.771657	Not Interesting
g23621	sp|Q9BX70|BTBD2_HUMAN	0.330796	0.481035	Not Interesting
g23692	sp|Q8VIJ8|NPRL3_MOUSE	-0.625668	-0.301423	Not Interesting
g23720	sp|P79702|FOS_CYPCA	3.09307	3.71286	Not Interesting
g2385	sp|Q684P5|RPGP2_HUMAN	-0.212092	-0.375463	Not Interesting
g23856	NA	2.12943	2.53027	Not Interesting
g23857	NA	1.31416	3.61926	Not Interesting
g23858	sp|Q6A548|TERT_CANLF	-0.605809	-0.421525	Not Interesting
g23859	sp|P02640|VILI_CHICK	-1.21529	-0.0170005	Head
g23878	sp|Q7ZZC8|NEK9_XENLA	0.851542	0.740899	Not Interesting
g23880	sp|Q8N129|CNPY4_HUMAN	-0.359625	-0.462389	Not Interesting
g23916	NA	1.22146	-0.303609	Not Interesting
g2398	sp|D3YXG0|HMCN1_MOUSE	-0.444913	-0.678894	Not Interesting
g24008	sp|P47033|PRY3_YEAST	-0.398167	-0.486994	Not Interesting
g2402	sp|Q9P2N4|ATS9_HUMAN	-0.386488	-0.666351	Not Interesting
g24024	sp|Q91X58|ZFN2B_MOUSE	1.47528	4.45654	Not Interesting
g24036	NA	1.67096	2.11239	Not Interesting
g24037	NA	0.563936	0.917135	Not Interesting
g24039	sp|Q3TZM9|ALG11_MOUSE	0.717543	0.685982	Not Interesting
g24114	sp|Q28FN6|OTX2_XENTR	0.321021	0.479401	Not Interesting
g24126	sp|O42097|FOXA2_ORYLA	-0.215181	0.673234	Head
g24129	sp|Q5RF84|UB2G2_PONAB	0.46885	0.475325	Not Interesting
g24130	sp|Q80ZD3|S2611_MOUSE	0.534235	0.744203	Not Interesting
g24147	NA	0.482999	0.458636	Not Interesting
g24191	sp|Q28107|FA5_BOVIN	2.02956	3.06502	Not Interesting
g24228	sp|Q6DFF6|KLH20_XENLA	-0.775363	-0.316179	Not Interesting
g24241	sp|Q6DIP5|EMAL4_XENTR	-0.634811	0.229408	Not Interesting
g24257	NA	0.722373	0.880891	Not Interesting
g24294	sp|Q9JHJ7|TEST_MOUSE	0.620549	0.691414	Not Interesting
g24307	sp|Q68ED2|GRM7_MOUSE	-0.0937869	-1.15171	Not Interesting
g24323	NA	1.75156	2.4988	Not Interesting
g24349	NA	1.72854	1.97705	Not Interesting
g24356	NA	-0.0839783	-0.449868	Not Interesting
g24360	sp|Q7SXV9|CALUB_DANRE	0.555812	0.533524	Not Interesting
g24398	sp|Q6INC8|VGLU1_XENLA	-0.374317	-0.514389	Not Interesting
g2440	NA	-0.691185	-0.71034	Not Interesting
g24406	sp|P11362|FGFR1_HUMAN	-0.0214887	-0.556409	Not Interesting
g24476	sp|P10079|FBP1_STRPU	-0.968412	-1.12628	Not Interesting
g24483	sp|P70211|DCC_MOUSE	-0.575365	0.370982	Head
g24547	sp|Q8WSF1|H33_TRIPS	0.771124	0.900383	Not Interesting
g2461	sp|Q90268|PAX2A_DANRE	-0.241154	-0.441755	Not Interesting
g24677	sp|Q03014|HHEX_HUMAN	-0.410303	-0.829926	Not Interesting
g24678	sp|Q04972|VIPA_SALTI	0.13431	1.0177	Not Interesting
g24679	sp|Q04973|VIPB_SALTI	0.28731	0.64013	Not Interesting
g24716	sp|O57457|E41L4_DANRE	-0.505202	-0.38486	Not Interesting
g24777	sp|Q7RTS6|OTOP2_HUMAN	-0.305672	-0.388308	Not Interesting
g24822	sp|P15253|CALR_RABIT	0.372068	0.356061	Not Interesting
g24876	NA	0.896052	0.950116	Not Interesting
g24883	NA	0.229164	0.754146	Not Interesting
g24903	sp|P29146|NECA_HYDVU	-0.402747	-0.6285	Not Interesting
g24911	NA	0.653633	1.14691	Not Interesting
g24930	sp|Q5SPH9|RT10_DANRE	0.392643	0.44738	Not Interesting
g24936	sp|Q54HW1|PSD10_DICDI	-0.177426	-2.16886	Foot
g24952	sp|O15178|BRAC_HUMAN	1.9378	3.84774	Head
g24983	sp|O75132|ZBED4_HUMAN	-0.717408	-1.13594	Not Interesting
g25021	sp|P97292|HRH2_MOUSE	-0.674167	-1.06654	Not Interesting
g25044	NA	0.997425	1.8398	Not Interesting
g25079	NA	0.27061	0.542202	Not Interesting
g25080	NA	0.206542	0.554303	Not Interesting
g25127	sp|A8TSS9|DMTA2_MONAL	1.20711	0.269216	Not Interesting
g25137	sp|Q28620|NPT2A_RABIT	0.73301	0.69852	Not Interesting
g25176	sp|Q5RBA5|SQSTM_PONAB	1.02887	1.6727	Head
g25238	sp|Q08D62|MAEL_XENTR	-0.438827	-0.51033	Not Interesting
g25321	NA	0.0874956	0.677479	Not Interesting
g25356	sp|P35555|FBN1_HUMAN	0.253894	0.574624	Not Interesting
g25362	sp|O88281|MEGF6_RAT	0.317689	0.733059	Not Interesting
g25364	sp|P41041|CALM_PNECA	1.005	0.8207	Not Interesting
g25416	sp|P24802|PLOD1_CHICK	0.880645	0.753452	Not Interesting
g25422	sp|Q5U367|PLOD3_RAT	1.48272	0.977275	Not Interesting
g25482	sp|Q865C0|CAH6_CANLF	-0.582353	-0.859494	Not Interesting
g25532	sp|O95980|RECK_HUMAN	-0.251831	-0.611316	Not Interesting
g25539	sp|Q0V8T4|CTP5C_RAT	-0.471859	-0.256801	Not Interesting
g25556	sp|A7E2S9|A30BL_HUMAN	0.211073	0.699879	Not Interesting
g25557	sp|Q9H1Y3|OPN3_HUMAN	0.645134	2.27272	Not Interesting
g25581	sp|Q2KJG3|SYNC_BOVIN	0.472957	0.563384	Not Interesting
g25724	sp|P49354|FNTA_HUMAN	0.407591	0.297674	Not Interesting
g25736	sp|Q99JY3|GIMA4_MOUSE	-0.56858	-0.91749	Not Interesting
g25747	sp|Q99715|COCA1_HUMAN	-0.320166	-0.431657	Not Interesting
g25768	sp|Q5R5F8|PANK4_PONAB	0.697941	0.929914	Not Interesting
g25771	sp|P38977|ANTA_HYDVU	0.622237	0.216873	Not Interesting
g25773	sp|P38977|ANTA_HYDVU	0.748356	0.459257	Not Interesting
g258	sp|Q24UI6|IF2_DESHY	0.487564	0.490646	Not Interesting
g25824	NA	-1.34588	-0.182652	Not Interesting
g25854	sp|Q9H1Y3|OPN3_HUMAN	-0.677388	-1.45184	Not Interesting
g25893	NA	-1.33625	1.01563	Head
g25927	NA	-0.568066	-0.443955	Not Interesting
g26061	sp|P48740|MASP1_HUMAN	0.684686	1.31393	Not Interesting
g2608	sp|Q7SZ59|RASLC_DANRE	0.626452	0.630872	Not Interesting
g26083	sp|P51399|LOX5_MESAU	0.813247	0.203671	Not Interesting
g2609	sp|O93530|WRN_XENLA	-0.319643	-0.41716	Not Interesting
g26213	sp|O75486|SUPT3_HUMAN	-0.182939	-0.606798	Not Interesting
g26244	sp|Q04637|IF4G1_HUMAN	-1.01693	-0.705419	Not Interesting
g26250	NA	1.40375	1.4962	Not Interesting
g26294	sp|Q9H0J9|PAR12_HUMAN	-0.397159	-0.156638	Not Interesting
g26299	sp|Q9NR09|BIRC6_HUMAN	-0.538756	-0.491502	Not Interesting
g26375	sp|Q6NWZ9|CDO1_DANRE	1.31424	1.45675	Not Interesting
g26425	sp|Q8K3X3|GMDS_CRIGR	0.70187	0.626469	Not Interesting
g26522	sp|A0A0R4IBK5|R213A_DANRE	-1.15594	-0.740562	Not Interesting
g26569	sp|Q96UM2|LAC3_BOTFU	0.751582	0.720098	Not Interesting
g26570	sp|Q96WM9|LAC2_BOTFU	0.775147	0.87771	Not Interesting
g26573	sp|Q96WM9|LAC2_BOTFU	0.724043	0.828877	Not Interesting
g26583	sp|Q68CZ2|TENS3_HUMAN	0.55263	0.455398	Not Interesting
g26620	sp|O75366|AVIL_HUMAN	-0.563743	-0.225989	Not Interesting
g26703	NA	0.432873	0.538041	Not Interesting
g26764	NA	-0.128854	-0.649395	Not Interesting
g26784	sp|C9D7R3|VMPA3_LOXIN	0.989856	1.6528	Not Interesting
g26787	NA	0.386195	0.483446	Not Interesting
g26797	sp|Q03326|OXIR_STRAT	0.520886	0.50887	Not Interesting
g26798	sp|P35320|OXIR_STRLI	1.30239	1.8305	Not Interesting
g26799	sp|Q03326|OXIR_STRAT	1.31304	1.57426	Not Interesting
g26809	NA	0.61752	0.884092	Not Interesting
g26840	sp|Q566L4|ZN703_XENTR	-0.334958	0.866029	Head
g26848	NA	0.33645	0.626679	Not Interesting
g26858	sp|P42289|DRD1_XENLA	1.3906	1.74203	Not Interesting
g2686	sp|P35317|AT1A_HYDVU	0.428258	1.06449	Not Interesting
g26877	sp|Q9UBI9|HDC_HUMAN	0.325756	0.468653	Not Interesting
g26884	sp|Q6DN14|MCTP1_HUMAN	0.574299	0.474143	Not Interesting
g2689	sp|Q800K6|TOB1A_XENLA	-0.319704	-0.592973	Not Interesting
g26934	sp|Q9UM47|NOTC3_HUMAN	-0.281149	-0.938673	Not Interesting
g26936	sp|P07207|NOTCH_DROME	-0.571592	-0.545422	Not Interesting
g270	sp|P86925|RLGM2_TRYB2	2.25922	2.67932	Not Interesting
g2700	sp|P35317|AT1A_HYDVU	-0.340998	-0.384468	Not Interesting
g27008	sp|Q9WV54|ASAH1_MOUSE	-0.55856	0.176781	Head
g27009	sp|A3KQV2|BROX_DANRE	0.199416	0.416148	Not Interesting
g27082	sp|Q80U40|RIMB2_MOUSE	-0.636122	-0.228954	Not Interesting
g27138	sp|O77775|NCF2_BOVIN	-0.730567	-1.39787	Not Interesting
g27164	sp|P21333|FLNA_HUMAN	0.288685	0.509134	Not Interesting
g27170	sp|Q68EQ1|GMPPB_XENTR	0.642996	0.79679	Not Interesting
g27171	sp|Q7JZB4|GMPPB_DROME	0.584605	0.743256	Not Interesting
g27225	NA	0.726295	0.560182	Not Interesting
g27236	sp|P23950|TISB_MOUSE	-0.700585	-0.291487	Not Interesting
g27266	sp|Q96CX6|LRC58_HUMAN	-0.517728	-0.572504	Not Interesting
g27312	NA	-0.277976	-0.995727	Not Interesting
g27334	sp|Q04831|GLNA_PANAR	0.604345	1.32057	Not Interesting
g27351	sp|Q86A72|Y4781_DICDI	0.46745	0.363279	Not Interesting
g27364	sp|P91943|PANG1_DROME	0.412633	1.24401	Head
g2738	sp|Q6P5D8|SMHD1_MOUSE	-0.616553	-0.617837	Not Interesting
g27455	sp|P45723|PLC_STAAE	0.351986	0.570369	Not Interesting
g27456	sp|Q18246|RAP1_CAEEL	0.289241	0.351271	Not Interesting
g27534	NA	0.757264	1.07192	Not Interesting
g27596	NA	0.880428	-0.0202355	Not Interesting
g27612	sp|Q8WVB3|HEXDC_HUMAN	0.233103	0.584141	Not Interesting
g2762	NA	-0.947362	-1.05881	Not Interesting
g27625	sp|Q8N9L1|ZIC4_HUMAN	-0.515073	-0.796169	Not Interesting
g27641	sp|Q9D1F4|AKTS1_MOUSE	-0.311119	-0.596475	Not Interesting
g27757	NA	0.0892834	1.64139	Not Interesting
g27772	sp|Q24040|BGB_DROME	1.79152	1.95835	Not Interesting
g27778	sp|Q03427|LAMC_DROME	-0.304895	0.973031	Head
g2784	NA	-0.695031	-0.753187	Not Interesting
g27852	sp|O75096|LRP4_HUMAN	-0.4904	-0.432529	Not Interesting
g27896	sp|P12027|PSGP_ONCMY	0.614021	0.465066	Not Interesting
g2790	sp|O43422|P52K_HUMAN	3.83639	5.01085	Not Interesting
g2792	sp|Q80YA8|CRUM2_MOUSE	-0.913945	-0.734258	Not Interesting
g27920	sp|Q9ESD1|PRSS8_MOUSE	0.680488	0.901666	Not Interesting
g27959	sp|Q63472|KCNH1_RAT	-1.0272	-1.04096	Not Interesting
g27960	NA	-0.555227	-0.387607	Not Interesting
g28001	sp|P21328|RTJK_DROME	5.53699	0.35361	Not Interesting
g28009	sp|Q9VCE9|UBS3A_DROME	-0.717511	-0.684087	Not Interesting
g28042	sp|Q67FQ3|ARHB_XENLA	0.396628	-0.692039	Foot
g28055	NA	-2.36352	-1.32064	Not Interesting
g2806	sp|P97739|ECE1_CAVPO	-0.356504	-0.590581	Not Interesting
g28064	sp|P17553|WNT3_MOUSE	0.711441	3.08054	Head
g28068	NA	-0.754918	-0.830481	Not Interesting
g28083	sp|Q6DN14|MCTP1_HUMAN	-0.467489	-0.357136	Not Interesting
g2810	NA	0.721918	1.12701	Not Interesting
g28117	sp|A6NMZ7|CO6A6_HUMAN	1.28735	0.866136	Not Interesting
g28136	sp|Q9NQW6|ANLN_HUMAN	0.681149	0.869445	Not Interesting
g28166	sp|Q8W257|PFI_PTIFI	2.50383	3.47786	Not Interesting
g28168	sp|E7FAM5|LIN41_DANRE	-0.407395	-0.57206	Not Interesting
g28232	NA	0.744457	0.648575	Not Interesting
g28253	NA	-0.619124	-0.696092	Not Interesting
g28262	sp|P41221|WNT5A_HUMAN	0.767043	0.603178	Not Interesting
g28273	NA	1.91305	2.81209	Not Interesting
g2830	sp|P10090|WHITE_DROME	0.0699594	0.590468	Not Interesting
g28301	sp|P22897|MRC1_HUMAN	0.319123	0.382583	Not Interesting
g28374	NA	-0.440324	-0.639808	Not Interesting
g28448	NA	0.550779	1.1915	Not Interesting
g28449	sp|P32028|FD4_DROME	-0.495738	-1.50591	Not Interesting
g28498	sp|Q78KK3|S22AI_MOUSE	-0.391573	-0.603635	Not Interesting
g28512	NA	-0.963938	-1.47745	Not Interesting
g28617	sp|Q86SS6|SYT9_HUMAN	0.589828	0.435339	Not Interesting
g2866	NA	0.905671	1.09146	Not Interesting
g28706	sp|Q8VDL4|ADPGK_MOUSE	0.519612	0.596659	Not Interesting
g28716	NA	3.11591	4.43023	Not Interesting
g28717	NA	1.8726	3.53822	Head
g28767	sp|Q9ERQ8|CAH7_MOUSE	-0.58838	-0.791297	Not Interesting
g28768	sp|P43166|CAH7_HUMAN	-0.609563	-0.786174	Not Interesting
g28783	NA	2.57739	3.55326	Not Interesting
g28784	NA	2.2353	3.0336	Not Interesting
g28785	NA	2.26474	3.36019	Not Interesting
g28786	sp|P35285|RB22A_MOUSE	0.606918	0.645562	Not Interesting
g28791	NA	1.16177	3.2142	Not Interesting
g28800	sp|O60494|CUBN_HUMAN	-0.572871	-0.559582	Not Interesting
g28828	sp|Q8WXR4|MYO3B_HUMAN	1.87358	1.92692	Not Interesting
g28839	sp|Q8IY50|S35F3_HUMAN	-0.427464	-0.936995	Not Interesting
g28899	sp|Q13057|COASY_HUMAN	0.345895	0.20217	Not Interesting
g28986	NA	-0.319401	-0.494997	Not Interesting
g28992	sp|O76360|EGL4_CAEEL	0.618962	1.09714	Not Interesting
g28994	sp|P02469|LAMB1_MOUSE	-0.424719	-0.64203	Not Interesting
g2903	sp|Q6GMK0|MGT4B_DANRE	0.314722	0.401803	Not Interesting
g29030	sp|P62775|MTPN_RAT	-1.24378	0.446232	Head
g29039	sp|Q64701|RBL1_MOUSE	-0.733156	-0.330916	Not Interesting
g2908	sp|Q6PEH9|S39AA_DANRE	0.683681	0.728866	Not Interesting
g29090	NA	-0.612519	-0.54282	Not Interesting
g29169	NA	-0.327479	-0.720178	Not Interesting
g292	NA	0.722705	0.986715	Not Interesting
g29211	sp|P50904|RASA1_RAT	0.388651	0.558827	Not Interesting
g29234	sp|Q28E95|SH3R1_XENTR	0.986449	0.299332	Foot
g29257	sp|Q8SQ72|SGCG_CANLF	0.680343	0.428463	Not Interesting
g29262	sp|Q8WP23|BOLL_MACFA	1.0678	1.2884	Not Interesting
g29266	sp|P51830|ADCY9_MOUSE	0.24153	0.577504	Not Interesting
g29308	sp|Q4L235|ACSF4_HUMAN	0.42573	1.25312	Not Interesting
g29309	sp|Q8TB61|S35B2_HUMAN	0.200039	0.658631	Not Interesting
g29352	NA	-0.83281	0.215021	Head
g29383	sp|Q7T3Q7|OPSO_RUTRU	0.183063	0.676263	Not Interesting
g29412	sp|P97739|ECE1_CAVPO	-0.139522	-1.16854	Foot
g2943	sp|Q62908|CSRP2_RAT	0.957694	0.768167	Not Interesting
g2944	sp|A2VDD2|TC1DB_XENLA	-1.00667	-0.981553	Not Interesting
g29448	sp|Q24799|MYPH_ECHGR	0.62309	1.03867	Not Interesting
g29454	sp|P72745|Y1101_SYNY3	0.357336	0.479503	Not Interesting
g29473	sp|Q6XL41|RHCG_CHICK	0.436897	0.387592	Not Interesting
g29481	sp|Q8BTN6|LENG9_MOUSE	1.08146	1.38847	Not Interesting
g29487	sp|A6QNS3|ABR_BOVIN	5.86866	6.22115	Not Interesting
g29497	sp|Q68FD7|FNIP1_MOUSE	-0.227995	-0.583033	Not Interesting
g29527	sp|Q8VE97|SRSF4_MOUSE	0.618528	0.619698	Not Interesting
g2954	sp|P32738|CLAT_RAT	0.978739	2.70631	Not Interesting
g29540	sp|P07314|GGT1_RAT	0.409534	0.347763	Not Interesting
g2955	NA	-0.693458	-0.808192	Not Interesting
g2956	NA	-0.585759	-0.808709	Not Interesting
g29567	sp|Q9VUL9|FUCTA_DROME	0.546656	1.10486	Not Interesting
g2959	NA	-0.488058	-0.638419	Not Interesting
g29616	sp|D3YXG0|HMCN1_MOUSE	-0.262121	-0.327285	Not Interesting
g29750	sp|Q98SN7|WNT2B_CHICK	1.39904	5.04445	Not Interesting
g29778	NA	0.489225	0.902927	Not Interesting
g29781	sp|Q05AS8|DVL2_XENTR	0.210017	0.79975	Not Interesting
g29786	sp|Q8IXB1|DJC10_HUMAN	0.488683	0.316779	Not Interesting
g29832	sp|P68037|UB2L3_MOUSE	0.407974	0.446243	Not Interesting
g29837	NA	0.611319	0.769564	Not Interesting
g2984	NA	-0.494196	-0.400781	Not Interesting
g29966	sp|P02269|H2A_ASTRU	1.07107	1.47784	Not Interesting
g29976	sp|Q8WWL2|SPIR2_HUMAN	1.00667	1.3231	Not Interesting
g29986	sp|Q5T011|SZT2_HUMAN	-0.587467	-0.427014	Not Interesting
g30081	sp|Q32MH5|F214A_HUMAN	0.794151	0.890275	Not Interesting
g30174	sp|Q0EEE2|PTHD3_MOUSE	-0.551829	-0.663083	Not Interesting
g30200	sp|P23978|SC6A1_RAT	0.411581	0.347036	Not Interesting
g30219	sp|Q9PVY8|FXC2B_XENLA	-0.647271	-0.500977	Not Interesting
g30222	NA	0.338291	0.377777	Not Interesting
g30252	NA	-0.427369	0.493068	Head
g30307	NA	-0.913484	-0.620462	Not Interesting
g30359	sp|P29558|RBMS1_HUMAN	0.7498	0.658016	Not Interesting
g30386	sp|Q28ET4|VENT1_XENTR	1.01146	2.06064	Not Interesting
g30398	sp|P02510|CRYAB_BOVIN	0.464254	1.06004	Not Interesting
g30406	NA	-0.398437	-0.835333	Not Interesting
g30409	sp|P48442|CASR_RAT	0.114914	1.60474	Not Interesting
g30442	NA	0.524924	2.34103	Head
g30537	sp|Q86YB8|ERO1B_HUMAN	0.437142	0.564359	Not Interesting
g30570	NA	1.42069	1.23346	Not Interesting
g30573	sp|A0KTG8|HLDE_SHESA	-0.0453162	1.29288	Head
g30584	sp|Q3UVC0|KSR2_MOUSE	-0.652025	-0.528538	Not Interesting
g30605	sp|Q92179|CHST3_CHICK	1.77472	1.46907	Not Interesting
g30630	sp|P42674|BP10_PARLI	0.745216	0.764729	Not Interesting
g30639	sp|Q20191|NAS13_CAEEL	0.716741	0.773567	Not Interesting
g30647	sp|P55115|NAS15_CAEEL	0.171842	0.414067	Not Interesting
g30648	sp|P55112|NAS4_CAEEL	0.212571	0.36524	Not Interesting
g30674	sp|B3STU3|CHAC1_RAT	0.671258	-0.16982	Not Interesting
g30700	sp|Q9BY84|DUS16_HUMAN	1.34955	1.6797	Not Interesting
g3075	sp|Q5W1J5|FOXP1_XENLA	-0.346973	-0.444235	Not Interesting
g30759	sp|Q9CQ52|CEL3B_MOUSE	0.434461	0.56874	Not Interesting
g30762	sp|Q01085|TIAR_HUMAN	0.425938	0.391681	Not Interesting
g30826	NA	-0.374144	-0.737573	Not Interesting
g30865	sp|Q9VZZ4|PXDN_DROME	0.696064	1.49678	Not Interesting
g30893	sp|Q9LMG7|PPA2_ARATH	0.181016	0.402042	Not Interesting
g30894	sp|Q86PM4|FGFR_HYDVU	0.952712	0.45136	Not Interesting
g30938	sp|Q9UJT9|FBXL7_HUMAN	-0.509556	-0.521939	Not Interesting
g30956	sp|E7FAM5|LIN41_DANRE	-0.203183	-0.445787	Not Interesting
g3099	sp|Q9QYS2|GRM3_MOUSE	-0.725071	-0.874387	Not Interesting
g31005	NA	-0.657154	-0.608958	Not Interesting
g31060	sp|Q8NCL4|GALT6_HUMAN	0.594096	0.531836	Not Interesting
g31061	sp|Q6WV17|GALT5_DROME	0.506203	0.553376	Not Interesting
g31085	NA	-0.881419	-0.959599	Not Interesting
g31086	NA	-0.98224	-0.99071	Not Interesting
g31098	sp|P97858|S35B1_MOUSE	0.297803	0.397519	Not Interesting
g3121	sp|Q3ZBG9|PLS2_BOVIN	0.457955	0.525407	Not Interesting
g31252	sp|Q27312|NADA_APLKU	0.659353	0.478198	Not Interesting
g31283	sp|Q9BT88|SYT11_HUMAN	1.29054	1.71423	Not Interesting
g31352	sp|Q9Z0J1|RECK_MOUSE	-0.376004	-0.529998	Not Interesting
g31440	sp|P25931|NPYR_DROME	0.0903993	-0.807773	Not Interesting
g31502	NA	0.615121	0.571027	Not Interesting
g31631	sp|Q9BRS8|LARP6_HUMAN	0.22418	0.725932	Not Interesting
g31632	sp|Q8AVU4|HES1B_XENLA	-0.921166	-1.05058	Not Interesting
g31686	NA	-1.10692	-1.19858	Not Interesting
g31719	NA	-0.264044	-0.672737	Not Interesting
g31723	sp|P43307|SSRA_HUMAN	0.412766	0.330578	Not Interesting
g31735	sp|O57321|EAA1_AMBTI	-0.689856	-0.680358	Not Interesting
g31801	sp|Q9I8D1|MYO6_CHICK	-0.479942	-0.46602	Not Interesting
g31900	sp|P23327|SRCH_HUMAN	0.69793	0.50984	Not Interesting
g32018	sp|Q24547|STX1A_DROME	0.417607	0.518708	Not Interesting
g32151	sp|Q8K157|GALM_MOUSE	-0.52813	-0.235271	Not Interesting
g32158	sp|P51399|LOX5_MESAU	1.21831	1.82088	Not Interesting
g32199	sp|P06865|HEXA_HUMAN	-0.397597	-0.43826	Not Interesting
g3220	sp|Q9TWL9|COMA_CONMA	0.526192	0.494482	Not Interesting
g32238	NA	2.58506	1.99711	Not Interesting
g32263	sp|Q9XTL9|PYG_DROME	0.302121	0.446223	Not Interesting
g32290	sp|Q96PN7|TREF1_HUMAN	-0.527271	-0.56031	Not Interesting
g32320	NA	1.065	0.992075	Not Interesting
g32331	sp|Q3SZN3|OMA1_BOVIN	0.457218	0.924566	Not Interesting
g32332	sp|A1L1V4|LOL2B_DANRE	0.73866	0.422106	Not Interesting
g32336	sp|Q9H5L6|THAP9_HUMAN	0.488196	1.39699	Not Interesting
g32459	NA	0.969727	1.48318	Not Interesting
g32552	sp|Q1LYG0|SPD2A_DANRE	1.03482	1.42379	Not Interesting
g32559	NA	-0.157728	-0.898848	Not Interesting
g32592	sp|O02228|SC5A7_CAEEL	0.640815	0.445845	Not Interesting
g32625	sp|Q539E5|APX1_HYDVD	0.495509	0.434898	Not Interesting
g32753	NA	0.747709	1.01762	Not Interesting
g32789	sp|Q2PZL6|FAT4_MOUSE	-0.99438	-1.01277	Not Interesting
g3283	sp|Q09328|MGT5A_HUMAN	1.51544	0.941444	Not Interesting
g32882	sp|O00222|GRM8_HUMAN	-0.606321	-0.728367	Not Interesting
g32887	NA	-0.392655	-0.626384	Not Interesting
g32919	NA	-1.26206	-1.75007	Not Interesting
g32935	sp|Q80ZF8|AGRB3_MOUSE	-0.538922	-0.526391	Not Interesting
g32982	sp|Q5R6T1|PDIA6_PONAB	0.473807	0.411982	Not Interesting
g32988	sp|Q9VQX4|PNCB_DROME	0.551305	0.438464	Not Interesting
g33052	sp|Q9Y5X5|NPFF2_HUMAN	-0.875073	-0.597188	Not Interesting
g33141	sp|Q9LHQ6|OCT4_ARATH	0.551694	1.00226	Not Interesting
g33146	sp|O75751|S22A3_HUMAN	0.458785	0.666504	Not Interesting
g33148	sp|Q8IZF6|AGRG4_HUMAN	-0.611371	-0.634626	Not Interesting
g33185	sp|Q7Z442|PK1L2_HUMAN	-0.693536	-0.78795	Not Interesting
g33186	sp|H2LRU7|PKD2_ORYLA	-1.71946	-1.12145	Not Interesting
g33240	NA	0.971266	0.948308	Not Interesting
g33251	sp|Q9ZNS4|PRB1_ARATH	-0.786084	-0.0645297	Not Interesting
g33271	NA	1.07195	0.700989	Not Interesting
g33275	sp|Q8VCK5|KLH20_MOUSE	0.565152	0.714092	Not Interesting
g33278	sp|Q6PHE8|CC124_DANRE	0.64922	0.636193	Not Interesting
g33324	NA	0.609648	1.0554	Not Interesting
g3337	sp|Q8NFA0|UBP32_HUMAN	-0.433893	-0.314449	Not Interesting
g33373	sp|P56706|WNT7B_HUMAN	-0.217385	7.61937	Head
g33396	sp|Q28EM7|OTX5_XENTR	-0.920315	-0.811048	Not Interesting
g33422	sp|Q62445|SP4_MOUSE	-0.633446	2.56856	Head
g33450	sp|A6QNK1|G3ST1_BOVIN	-0.428423	-0.802053	Not Interesting
g33457	NA	-0.564292	-0.678189	Not Interesting
g33477	sp|Q24799|MYPH_ECHGR	0.563369	0.538674	Not Interesting
g33493	sp|B3LYS5|FOXO_DROAN	-0.43519	-0.393614	Not Interesting
g33496	sp|Q9QX47|SON_MOUSE	0.483739	0.487723	Not Interesting
g33497	sp|Q01149|CO1A2_MOUSE	0.532163	0.447299	Not Interesting
g33581	NA	1.07257	2.00757	Head
g33605	sp|Q9VAS7|INX3_DROME	-0.768371	-0.584238	Not Interesting
g33606	sp|Q9VAS7|INX3_DROME	-0.652586	-1.0291	Not Interesting
g33633	NA	-0.614435	-0.79273	Not Interesting
g33643	NA	0.216414	0.494242	Not Interesting
g33656	sp|Q553X7|GALE_DICDI	0.548539	0.502242	Not Interesting
g33661	sp|Q5R733|CPEB1_PONAB	-1.13093	-0.168942	Head
g33686	NA	0.611459	0.458925	Not Interesting
g33690	sp|P21328|RTJK_DROME	-0.269966	1.06955	Not Interesting
g33693	sp|P18428|LBP_HUMAN	0.703088	0.449143	Not Interesting
g33728	sp|Q01433|AMPD2_HUMAN	0.210746	0.492879	Not Interesting
g33739	sp|Q8BQM9|MD12L_MOUSE	-0.441313	-0.510617	Not Interesting
g33749	sp|G5EGQ6|TEN1_CAEEL	0.783815	0.788062	Not Interesting
g33757	NA	1.07322	1.13452	Not Interesting
g33803	NA	0.127791	-0.941563	Not Interesting
g34	sp|P30260|CDC27_HUMAN	0.418046	0.68673	Not Interesting
g3411	NA	-0.171534	-0.466179	Not Interesting
g3419	sp|Q9VAI0|GNA1_DROME	1.23677	1.37208	Not Interesting
g3460	sp|P55112|NAS4_CAEEL	-0.544814	-0.781339	Not Interesting
g3553	sp|A0LMC1|PHNX_SYNFM	-0.709957	-0.00347916	Head
g3650	sp|Q8BGD4|SO4C1_MOUSE	-0.703683	-0.0541964	Not Interesting
g3660	NA	1.09249	1.91099	Not Interesting
g3694	NA	-0.329157	0.984364	Head
g370	sp|Q68US5|EVA1C_PANTR	-0.528579	-0.647371	Not Interesting
g3709	NA	0.854842	1.01127	Not Interesting
g3710	sp|P38977|ANTA_HYDVU	2.21077	2.75583	Not Interesting
g3756	sp|Q5RDQ3|AMERL_PONAB	0.599455	0.497403	Not Interesting
g3791	sp|D3YXG0|HMCN1_MOUSE	-0.856019	-0.454519	Not Interesting
g3847	sp|A4QNP7|DMTA2_XENTR	0.633473	-0.359039	Foot
g3893	sp|Q8GXG1|ASPGB_ARATH	6.00253	6.47174	Not Interesting
g3899	sp|Q16629|SRSF7_HUMAN	0.396046	0.458156	Not Interesting
g3966	sp|Q38SD2|LRRK1_HUMAN	-0.850107	-0.915388	Not Interesting
g3974	sp|Q6S5C2|GNPTG_MOUSE	0.402468	0.673528	Not Interesting
g3976	NA	0.454056	0.428793	Not Interesting
g4000	sp|Q6CA53|APT_YARLI	0.904277	0.475432	Not Interesting
g4003	sp|Q63475|PTPR2_RAT	0.481564	0.633992	Not Interesting
g4015	NA	-0.347082	-0.827485	Not Interesting
g4024	NA	-0.551598	0.753501	Head
g4061	sp|P47032|PRY1_YEAST	0.930282	0.715683	Not Interesting
g4174	sp|Q5F4B2|SWP70_CHICK	1.18788	1.53365	Not Interesting
g4303	sp|Q5VV41|ARHGG_HUMAN	-0.482417	-0.559582	Not Interesting
g4304	sp|Q04771|ACVR1_HUMAN	-0.556101	-0.523902	Not Interesting
g4318	NA	1.44134	1.5327	Not Interesting
g4319	NA	2.58543	3.0536	Not Interesting
g4323	NA	2.322	3.29342	Not Interesting
g4324	sp|P22274|ARF_CANAL	3.44595	4.64454	Not Interesting
g433	sp|Q9WV48|SHAN1_RAT	-0.526918	-0.664274	Not Interesting
g4386	NA	-1.0889	-1.38269	Not Interesting
g4389	sp|B3EWZ3|CADN_ACRMI	-0.751138	-0.137911	Not Interesting
g44	sp|Q86WA9|S2611_HUMAN	-0.447897	-0.59465	Not Interesting
g4402	sp|B3EWZ3|CADN_ACRMI	-1.01979	-0.1162	Not Interesting
g4403	sp|B3EWZ3|CADN_ACRMI	-0.638294	-0.148434	Not Interesting
g4409	sp|P9WKB9|Y1760_MYCTU	0.840772	0.484833	Not Interesting
g4469	NA	1.88232	4.62305	Not Interesting
g4475	NA	0.76882	0.862203	Not Interesting
g4537	sp|P20585|MSH3_HUMAN	-0.670052	-0.626587	Not Interesting
g4584	NA	-0.396937	-0.520429	Not Interesting
g46	sp|Q86WA9|S2611_HUMAN	1.82292	1.95906	Not Interesting
g4679	sp|Q7U6F4|RIMK_SYNPX	0.813291	0.448057	Not Interesting
g4713	sp|Q9ULH7|MKL2_HUMAN	-0.00144647	0.392753	Not Interesting
g4715	NA	-0.205339	1.05436	Head
g4765	sp|P50430|ARSB_RAT	-0.356951	-0.461911	Not Interesting
g4769	sp|Q5M8U1|ELOV5_XENTR	-0.404046	-0.561191	Not Interesting
g478	NA	-0.392614	-0.476032	Not Interesting
g4815	sp|Q9VW26|OAT_DROME	0.978772	1.4319	Not Interesting
g4856	sp|Q9ESM0|IP6K1_RAT	0.840948	0.686444	Not Interesting
g4917	sp|P25723|TLD_DROME	-0.498386	-1.71033	Not Interesting
g4921	NA	-0.670313	-0.804692	Not Interesting
g4922	sp|D3ZHV2|MACF1_RAT	0.182219	0.367704	Not Interesting
g5003	sp|Q9H4G4|GAPR1_HUMAN	0.289635	0.550555	Not Interesting
g5035	NA	-0.284851	-0.481411	Not Interesting
g5051	sp|Q5RJW5|IRS2B_XENLA	-0.371369	-0.297777	Not Interesting
g507	sp|P48430|SOX2_CHICK	-0.564153	-0.507249	Not Interesting
g5112	sp|A0A0R4IBK5|R213A_DANRE	-0.751095	-0.720557	Not Interesting
g5130	sp|Q8TB72|PUM2_HUMAN	-0.370634	-0.410902	Not Interesting
g5147	NA	-0.22698	1.24827	Head
g5180	NA	0.639439	0.568865	Not Interesting
g5217	NA	0.589907	0.645792	Not Interesting
g5218	sp|Q9TWL9|COMA_CONMA	0.422135	0.603498	Not Interesting
g5257	NA	0.879438	1.66802	Not Interesting
g5350	sp|Q8C5H1|ANO4_MOUSE	-0.810987	-0.606758	Not Interesting
g5403	sp|Q76KP1|B4GN4_HUMAN	0.875259	1.53908	Not Interesting
g5410	NA	0.906949	1.67745	Not Interesting
g5411	NA	-0.478575	1.89012	Head
g5455	NA	-0.0453837	1.13559	Head
g5459	NA	-0.423881	-0.893242	Not Interesting
g5466	sp|Q9GNN8|CTXA_CARAL	-0.33456	-0.443607	Not Interesting
g5483	sp|Q9GNN8|CTXA_CARAL	-0.376364	-0.496462	Not Interesting
g5500	sp|Q84UV8|NEC3_NICLS	-0.990445	-0.904395	Not Interesting
g5520	NA	0.337385	0.783182	Not Interesting
g5525	sp|P11308|ERG_HUMAN	0.125723	0.490612	Not Interesting
g5530	sp|Q27968|DNJC3_BOVIN	1.0676	1.02431	Not Interesting
g557	NA	-0.380657	-0.845251	Not Interesting
g5621	sp|Q9W751|PITX1_XENLA	0.481705	1.8564	Not Interesting
g564	sp|Q35101|COX1_METSE	-0.439948	-1.13498	Not Interesting
g5660	sp|A8TX70|CO6A5_HUMAN	0.656896	0.302345	Not Interesting
g5697	sp|B8V7P3|CAH_ACRMI	-0.771946	-0.887716	Not Interesting
g5698	NA	-0.788276	-0.922503	Not Interesting
g5731	sp|E1BE02|E2F7_BOVIN	-0.464384	-0.337772	Not Interesting
g5735	sp|O54834|RHG06_MOUSE	-0.263451	-1.19417	Not Interesting
g5757	sp|P32794|AFG2_YEAST	0.486597	0.504726	Not Interesting
g5758	NA	0.41453	0.615191	Not Interesting
g5880	NA	-0.789102	-0.948267	Not Interesting
g5882	sp|Q9PVW8|SAL_SILAS	1.15773	1.74041	Not Interesting
g5883	sp|Q9PVW8|SAL_SILAS	-0.540636	-0.434614	Not Interesting
g5897	sp|Q61830|MRC1_MOUSE	0.959698	1.03994	Not Interesting
g5947	sp|Q626N3|TM151_CAEBR	0.685317	0.931724	Not Interesting
g595	sp|Q9BGI2|PRDX4_BOVIN	0.604866	0.517424	Not Interesting
g5988	sp|P75820|AMID_ECOLI	0.504322	0.578187	Not Interesting
g5995	sp|O08605|MKNK1_MOUSE	-0.678759	-0.188457	Not Interesting
g604	NA	-0.463778	-0.595752	Not Interesting
g6067	NA	0.566653	1.09264	Not Interesting
g6131	sp|O73853|CP17A_ICTPU	0.807284	1.97649	Not Interesting
g6138	NA	1.19673	2.19176	Not Interesting
g6164	sp|Q9UHC6|CNTP2_HUMAN	-0.875598	-0.32506	Not Interesting
g6167	sp|Q8BH04|PCKGM_MOUSE	-0.33202	-0.598295	Not Interesting
g6182	NA	0.34983	1.45952	Not Interesting
g6256	NA	0.520732	1.45744	Not Interesting
g6282	NA	-0.851408	-0.833374	Not Interesting
g6320	sp|P35317|AT1A_HYDVU	0.6032	0.796458	Not Interesting
g6351	sp|Q9P2E2|KIF17_HUMAN	-0.476647	-0.554226	Not Interesting
g637	sp|Q54LN4|GGHA_DICDI	-0.391551	-0.655902	Not Interesting
g6387	sp|P08183|MDR1_HUMAN	0.757618	0.914682	Not Interesting
g6403	NA	-0.653479	-0.0334104	Not Interesting
g6418	sp|Q05187|TGMH_TACTR	-0.744521	0.0562071	Head
g6466	sp|A6QNS3|ABR_BOVIN	1.30452	1.17474	Not Interesting
g6623	sp|Q32KJ8|ARSI_RAT	-0.361584	-0.722696	Not Interesting
g6624	NA	-0.410078	-0.655865	Not Interesting
g664	sp|Q5IS99|CASP3_SAIBB	0.629976	0.498826	Not Interesting
g6652	sp|O14672|ADA10_HUMAN	0.287796	0.347202	Not Interesting
g6653	sp|Q10741|ADA10_BOVIN	0.331512	0.419949	Not Interesting
g6659	sp|Q8HXX6|SAP3_MACFA	0.260802	0.823306	Not Interesting
g6732	sp|Q54KA7|SECG_DICDI	4.68971	5.00756	Not Interesting
g6779	NA	4.71319	6.75638	Not Interesting
g6850	sp|G8HTB6|ZPP_ACRMI	0.610865	0.459576	Not Interesting
g69	sp|O57460|TLL1_DANRE	0.324893	0.568801	Not Interesting
g6940	sp|A6QPT7|ERAP2_BOVIN	-0.435031	-0.619089	Not Interesting
g6980	NA	-0.975272	-1.10849	Not Interesting
g6983	sp|P28651|CAH8_MOUSE	-0.94722	-1.14874	Not Interesting
g7086	sp|P98198|AT8B2_HUMAN	0.390067	0.52909	Not Interesting
g710	sp|Q9NBX4|RTXE_DROME	0.824408	1.27018	Not Interesting
g7113	sp|Q9P267|MBD5_HUMAN	-0.57807	-0.546624	Not Interesting
g7119	sp|O60239|3BP5_HUMAN	0.597301	1.35496	Not Interesting
g712	NA	0.837171	1.27582	Not Interesting
g7128	sp|Q6PF45|VIAAT_XENLA	0.416482	0.890073	Not Interesting
g7129	sp|Q6PF45|VIAAT_XENLA	0.8126	-0.470593	Not Interesting
g7149	sp|A1DWM3|MFSD6_PIG	-0.293676	-0.404809	Not Interesting
g7203	sp|C5G6D7|CABC2_BACT4	-0.665513	-0.0791465	Not Interesting
g7255	sp|Q9W0Y8|SCN60_DROME	-0.550869	-0.349872	Not Interesting
g726	NA	0.465858	0.958667	Not Interesting
g7262	sp|P35224|CTNB_URECA	0.662364	0.758234	Not Interesting
g7264	sp|Q0VFM6|GMPPA_XENTR	0.327804	0.621997	Not Interesting
g7319	sp|P41594|GRM5_HUMAN	-1.42056	-0.547061	Not Interesting
g7356	sp|D3ZEN0|MILK2_RAT	0.457887	0.626877	Not Interesting
g7398	sp|Q27128|PAPSS_URECA	0.69239	0.789207	Not Interesting
g7422	sp|Q55GQ6|UPP_DICDI	0.683446	0.68791	Not Interesting
g7427	NA	-0.380634	-0.714695	Not Interesting
g7502	sp|Q95L74|CY24B_BISBI	0.439611	0.837546	Not Interesting
g7524	sp|Q6ZMG9|CERS6_HUMAN	0.461926	0.51427	Not Interesting
g7633	sp|Q5SX19|PIGL_MOUSE	-1.26033	-0.957677	Not Interesting
g7648	NA	0.470299	0.497554	Not Interesting
g7652	sp|Q52KG5|KI26A_MOUSE	-0.532995	-0.201417	Not Interesting
g7675	sp|P42128|FOXK1_MOUSE	-0.940887	-0.919158	Not Interesting
g7738	NA	0.292806	0.623073	Not Interesting
g7775	sp|O02703|BAX_BOVIN	0.560761	0.782718	Not Interesting
g7832	sp|O95267|GRP1_HUMAN	0.582979	0.698935	Not Interesting
g7838	NA	0.0565013	0.36834	Not Interesting
g7871	NA	0.926612	0.613028	Not Interesting
g7896	NA	-0.410828	-0.757466	Not Interesting
g79	sp|Q9C0F3|ZN436_HUMAN	0.519346	0.642447	Not Interesting
g7906	NA	0.596258	0.212245	Not Interesting
g7964	sp|Q03717|KCNB1_MOUSE	0.621066	0.965616	Not Interesting
g7977	sp|Q9R0S2|MMP24_MOUSE	3.33674	3.66627	Not Interesting
g7978	sp|O77592|S35A3_CANLF	0.817476	1.24374	Not Interesting
g8004	sp|Q8H0T9|KTNB1_ARATH	0.506997	0.438975	Not Interesting
g8051	sp|Q58DD2|S2611_BOVIN	0.0527431	1.02143	Not Interesting
g8144	sp|A6QPH9|ZMYM5_BOVIN	0.913166	5.00398	Not Interesting
g8165	sp|P10079|FBP1_STRPU	-0.31557	-0.484371	Not Interesting
g8427	sp|Q8JI28|TLL1_XENLA	1.67453	2.03345	Not Interesting
g8465	NA	-0.338978	-0.453477	Not Interesting
g8497	sp|O42350|CO1A2_LITCT	0.507526	0.322432	Not Interesting
g856	sp|Q503V9|ENDUB_DANRE	1.0062	1.27571	Not Interesting
g8591	sp|Q14AT5|ANO7_MOUSE	0.785064	0.990967	Not Interesting
g8603	sp|Q6ZR37|PKHG7_HUMAN	-0.559502	-0.10592	Not Interesting
g8621	sp|P0CB38|PAB4L_HUMAN	-0.816286	-0.933679	Not Interesting
g8661	sp|Q9P2J8|ZN624_HUMAN	-0.626456	-0.463871	Not Interesting
g8682	NA	-0.176928	-0.495605	Not Interesting
g8688	NA	-0.522251	-0.550115	Not Interesting
g8690	sp|Q7TQK0|CCNT2_MOUSE	-0.574584	-0.550009	Not Interesting
g87	sp|Q4KMC4|GFPT2_RAT	0.91868	0.724871	Not Interesting
g8735	sp|Q7Z442|PK1L2_HUMAN	-0.40766	-0.645962	Not Interesting
g8745	NA	-0.222875	-1.12813	Not Interesting
g8764	NA	-0.535861	-0.63096	Not Interesting
g8768	sp|Q1KKZ3|HXA9B_TAKRU	-0.497569	-0.496252	Not Interesting
g8784	sp|A1L1W9|MOT10_DANRE	0.731585	0.364187	Not Interesting
g8798	sp|Q7Z2Y8|GVIN1_HUMAN	-1.00103	-1.0355	Not Interesting
g8864	sp|P31948|STIP1_HUMAN	0.581703	0.599426	Not Interesting
g8909	NA	-1.35082	-2.01874	Not Interesting
g8917	sp|P48800|FGF2_CHICK	-1.2211	0.516932	Not Interesting
g8942	sp|O94844|RHBT1_HUMAN	-0.63254	-0.17613	Not Interesting
g8947	sp|Q5ZKX1|CHM1B_CHICK	0.629898	0.879537	Not Interesting
g8968	sp|P55112|NAS4_CAEEL	0.663262	0.842783	Not Interesting
g8972	sp|Q99KF1|TMED9_MOUSE	0.412933	0.319414	Not Interesting
g8976	NA	-0.544665	-0.918378	Not Interesting
g9001	sp|Q9H7F0|AT133_HUMAN	-0.355211	-0.505487	Not Interesting
g9042	sp|P21328|RTJK_DROME	-0.293047	8.97744	Head
g9063	sp|Q9UPI3|FLVC2_HUMAN	1.06692	0.14339	Not Interesting
g9099	NA	0.524622	0.661804	Not Interesting
g9117	NA	0.740006	1.28826	Not Interesting
g9118	NA	3.73791	2.63411	Not Interesting
g9166	sp|Q8UWA5|CAH2_TRIHK	0.595205	0.527342	Not Interesting
g9169	sp|Q8UWA5|CAH2_TRIHK	2.10638	2.97119	Not Interesting
g9184	sp|P81900|KAPR2_DROME	-0.0390433	1.07227	Not Interesting
g9204	sp|B3TP03|CTR2_CHICK	-0.354239	-0.279603	Not Interesting
g9227	sp|Q6GME2|CK054_XENLA	0.465858	0.613819	Not Interesting
g9365	sp|Q9R0S2|MMP24_MOUSE	0.573998	0.604184	Not Interesting
g947	sp|P61150|FGF12_RAT	0.516404	0.609817	Not Interesting
g9527	sp|A6H742|PLSI_BOVIN	-0.520796	-0.302478	Not Interesting
g9565	sp|Q27746|DNMT1_PARLI	0.472622	0.915997	Not Interesting
g9572	sp|P26436|ASPX_HUMAN	1.28194	0.877986	Not Interesting
g9592	sp|A0ZSK4|STXB_SYNVE	-0.942794	-1.37124	Not Interesting
g9693	sp|P18503|CAS4_EPHMU	0.258798	1.14893	Not Interesting
g9795	NA	0.394222	0.324576	Not Interesting
g9857	sp|P39795|TREC_BACSU	1.11109	1.51339	Not Interesting
g9994	sp|Q2W2L2|RS11_MAGSA	-0.457393	2.46973	Head

## Sheet: Fig. 1F
Peak ID	Gene ID	Swissprot Annotation	Foot Reg logFC	Head Reg logFC	Structural Enrichment
10	g5778	NA	-0.615522	-0.750092	Not Interesting
100022	g31460	sp|Q7Z494|NPHP3_HUMAN	-0.308595	-0.642628	Not Interesting
100036	g31462	sp|P17126|ACT_HYDVU	0.474038	-0.0152468	Not Interesting
100155	g27218	sp|P98154|IDD_MOUSE	-0.668734	-0.130122	Not Interesting
100175	g27219	sp|P53814|SMTN_HUMAN	-0.186261	-0.642548	Not Interesting
100176	g27219	sp|P53814|SMTN_HUMAN	-0.549103	-1.06584	Not Interesting
100180	g27219	sp|P53814|SMTN_HUMAN	-0.879069	-0.729515	Not Interesting
100184	g27219	sp|P53814|SMTN_HUMAN	-0.441355	-0.4118	Not Interesting
100202	g27221	NA	-0.238541	0.919657	Head
100203	g27221	NA	-0.407801	1.10429	Head
100206	g27223	NA	-0.267077	1.91731	Head
100214	g27225	NA	-1.91402	0.318611	Head
100216	g27225	NA	-0.539437	-0.0402752	Not Interesting
100220	g16419	NA	1.27496	1.67716	Not Interesting
100236	g16499	NA	-0.069581	-0.711472	Not Interesting
100270	g16505	NA	-0.347774	-0.671477	Not Interesting
100319	g16538	sp|Q28GD9|RNH2B_XENTR	-0.76276	-1.035	Not Interesting
10032	g2839	NA	0.0683808	0.687376	Not Interesting
100369	g16544	sp|A6QQ21|CSN6_BOVIN	0.20418	0.943013	Not Interesting
100377	g16546	sp|E7F5E1|CE162_DANRE	1.43132	1.96232	Not Interesting
100412	g16556	NA	-0.410045	-0.767888	Not Interesting
100419	g16557	sp|Q09604|VAB15_CAEEL	-1.4223	-0.736933	Not Interesting
100420	g16557	sp|Q09604|VAB15_CAEEL	-0.542561	-0.12138	Not Interesting
100421	g16557	sp|Q09604|VAB15_CAEEL	-1.26364	-1.32962	Not Interesting
100422	g16557	sp|Q09604|VAB15_CAEEL	-1.28779	-0.552165	Not Interesting
100487	g5289	sp|Q7ZUW2|HYOU1_DANRE	0.789601	0.612965	Not Interesting
100500	g20013	NA	-0.7027	-1.25161	Not Interesting
100589	g17139	sp|Q90610|NEO1_CHICK	-1.00253	-0.526544	Not Interesting
100610	g17146	sp|Q7JQ07|MOS1T_DROMA	0.256606	0.871983	Not Interesting
100630	g17150	sp|Q02006|Y4233_RHOPA	0.817768	0.909288	Not Interesting
100643	g17151	NA	1.67638	1.45947	Not Interesting
100655	g17154	sp|Q9EPB1|DPP2_RAT	-0.882258	-1.03194	Not Interesting
10071	g2855	NA	-0.666847	-1.1751	Not Interesting
10082	g17518	NA	-0.532595	-0.938551	Not Interesting
10083	g17518	NA	-1.02684	-2.37398	Not Interesting
100835	g6538	NA	-1.00087	0.438495	Head
100836	g6538	NA	-0.71867	0.489737	Head
100837	g6538	NA	-0.747782	-0.240676	Not Interesting
10084	g17518	NA	-0.286965	-0.360315	Not Interesting
100869	g6548	sp|Q6ZQ89|MARH6_MOUSE	-0.152714	-0.540681	Not Interesting
100889	g6554	NA	-0.406425	-1.11962	Not Interesting
10090	g17518	NA	-1.07146	-1.07569	Not Interesting
10091	NA	NA	-0.457121	-0.561705	Not Interesting
100995	g1654	NA	-0.456989	-0.491021	Not Interesting
101008	g1659	NA	-1.32605	-0.778909	Not Interesting
101082	g12829	NA	-0.209868	-0.455212	Not Interesting
101086	g12831	NA	0.788214	0.602949	Not Interesting
101138	g9138	sp|Q9QXA6|BAT1_MOUSE	-0.569775	-0.550519	Not Interesting
10118	g1089	sp|Q60547|SYCP3_MESAU	-0.18637	-0.337491	Not Interesting
101187	g31949	NA	-0.619411	-0.485919	Not Interesting
101189	g31949	NA	-0.711127	-1.59188	Not Interesting
101199	g31950	NA	-1.09059	-1.91374	Not Interesting
101207	g31952	NA	-0.938371	-0.527256	Not Interesting
101215	g31953	NA	-0.114585	-0.569506	Not Interesting
101218	g31953	NA	-0.82739	-1.49105	Not Interesting
10124	g1092	NA	-0.453019	-1.3847	Not Interesting
101253	g31959	NA	0.603158	1.30306	Not Interesting
101300	g9491	NA	-0.753385	-0.478078	Not Interesting
101324	g9510	sp|O88484|PDP2_RAT	-0.899714	0.407574	Head
101374	g29508	NA	0.616317	0.486124	Not Interesting
101386	g29510	sp|Q5ZHY5|CHIP_CHICK	0.5467	0.225552	Not Interesting
101465	g7439	sp|Q6PC91|BT3L4_DANRE	0.53666	0.256483	Not Interesting
101498	g33690	sp|P21328|RTJK_DROME	-0.430033	1.06012	Head
101499	g33690	sp|P21328|RTJK_DROME	0.0635268	1.15971	Head
101503	g21432	sp|O42387|RS24_TAKRU	0.631789	0.326422	Not Interesting
101578	g13015	NA	-0.554394	-0.502331	Not Interesting
101580	g13016	sp|Q5ZKD9|KLH20_CHICK	-0.0337955	0.53456	Not Interesting
101625	g13029	NA	-0.817639	-0.681994	Not Interesting
101641	g9118	NA	-0.522393	-0.318974	Not Interesting
101728	g22611	NA	0.406342	0.790665	Not Interesting
101738	g22612	sp|Q91827|AR1_XENLA	-0.628566	-0.286349	Not Interesting
101741	g22613	sp|Q0VD42|TM136_BOVIN	0.967436	0.735523	Not Interesting
101809	g31753	NA	-0.324993	-0.500304	Not Interesting
101829	g31766	NA	0.127741	0.755557	Not Interesting
101866	g31795	sp|Q8ETH0|HMP_OCEIH	-0.871803	-0.611092	Not Interesting
101869	g31795	sp|Q8ETH0|HMP_OCEIH	-0.6222	-0.286387	Not Interesting
101875	g31795	sp|Q8ETH0|HMP_OCEIH	-1.01333	-0.778894	Not Interesting
101876	g31795	sp|Q8ETH0|HMP_OCEIH	-0.978228	-0.873273	Not Interesting
101903	g31804	NA	0.252373	0.758997	Not Interesting
101905	g31803	NA	-0.647833	-0.0495566	Not Interesting
101960	g18772	sp|Q626N3|TM151_CAEBR	-0.683883	-1.1011	Not Interesting
101992	g1128	NA	-0.35139	-0.453467	Not Interesting
102043	g1143	sp|Q60997|DMBT1_MOUSE	-0.756914	-0.0125394	Not Interesting
102083	g1155	sp|Q86HQ2|ABCG8_DICDI	-0.23718	-0.816938	Not Interesting
102153	g1203	NA	0.728053	0.691425	Not Interesting
102156	g1205	NA	-1.31763	-0.888247	Not Interesting
102277	g21201	sp|Q63430|CSDC2_RAT	1.51982	1.60393	Not Interesting
102337	g21219	sp|Q90623|MYPT1_CHICK	-0.0720627	-0.782801	Not Interesting
102356	g21221	NA	-0.90143	-0.620493	Not Interesting
102363	g21222	sp|Q7LHG5|YI31B_YEAST	1.0508	0.549444	Not Interesting
102371	g21226	NA	-0.288558	-0.863855	Not Interesting
1024	g13519	sp|Q7M456|RNOY_CRAGI	-0.816304	-1.34333	Not Interesting
102413	g33476	NA	0.950312	0.451024	Not Interesting
102438	g33492	NA	-0.914495	0.0907326	Head
102440	g33492	NA	-1.2492	-0.447042	Not Interesting
102441	g33492	NA	-0.450133	0.583161	Head
10245	g29740	sp|P33610|PRI2_MOUSE	0.134273	0.623957	Not Interesting
102450	g33493	sp|B3LYS5|FOXO_DROAN	-0.648635	0.0309945	Not Interesting
102451	g33493	sp|B3LYS5|FOXO_DROAN	-0.937632	0.101417	Not Interesting
102452	g33493	sp|B3LYS5|FOXO_DROAN	-0.915039	-0.458113	Not Interesting
102460	g33494	NA	0.48353	0.512001	Not Interesting
102497	g23187	NA	-0.269384	-0.455191	Not Interesting
1025	g13519	sp|Q7M456|RNOY_CRAGI	-0.197631	-0.330342	Not Interesting
102511	g23188	sp|P31646|S6A13_RAT	-0.0645396	-0.525353	Not Interesting
102513	g23188	sp|P31646|S6A13_RAT	-0.437243	-0.443798	Not Interesting
102553	g23196	NA	-0.330365	-0.509904	Not Interesting
102612	g14838	sp|Q8CBH5|MFSD6_MOUSE	-0.405955	-0.653938	Not Interesting
102622	g14839	sp|B0UYT5|MFD6B_DANRE	-0.444575	-0.37954	Not Interesting
102636	g9166	sp|Q8UWA5|CAH2_TRIHK	0.602382	0.474791	Not Interesting
102637	g9166	sp|Q8UWA5|CAH2_TRIHK	-0.648733	-0.671854	Not Interesting
102638	g9166	sp|Q8UWA5|CAH2_TRIHK	-0.377358	0.308866	Head
102667	g9169	sp|Q8UWA5|CAH2_TRIHK	-1.26549	-0.760587	Not Interesting
102675	g9170	sp|Q99808|S29A1_HUMAN	0.402101	0.1678	Not Interesting
10271	g29749	sp|Q24207|BOULE_DROME	0.378723	1.48341	Not Interesting
10274	g29750	sp|Q98SN7|WNT2B_CHICK	-0.151026	0.68367	Head
102781	g9208	NA	-1.66254	-0.595822	Head
102782	g9208	NA	-0.781529	-0.140614	Not Interesting
102791	g9209	sp|P49916|DNLI3_HUMAN	0.149581	-0.998183	Foot
102843	g21939	NA	-0.474329	-0.767344	Not Interesting
103043	g7729	NA	-0.383496	-0.0762989	Not Interesting
103061	g7731	NA	-0.366302	-0.522597	Not Interesting
1031	g13520	NA	0.19939	0.735144	Not Interesting
103104	g413	NA	-0.361827	-0.480783	Not Interesting
103128	g421	sp|P62083|RS7_RAT	0.428144	0.207297	Not Interesting
103148	g431	NA	0.452741	0.350259	Not Interesting
103217	g445	NA	-0.430657	0.193122	Head
103224	g447	sp|Q8IZF6|AGRG4_HUMAN	1.10956	1.19521	Not Interesting
103229	g447	sp|Q8IZF6|AGRG4_HUMAN	0.473894	1.76357	Not Interesting
103231	g447	sp|Q8IZF6|AGRG4_HUMAN	-0.287836	0.591107	Head
103271	g453	sp|P21213|HUTH_RAT	-0.702134	0.99754	Head
103291	g15133	sp|Q6MG82|PRRT1_RAT	0.432521	0.871399	Not Interesting
103321	g15140	NA	-0.265609	-0.50598	Not Interesting
103322	g15141	sp|A4IG66|TM201_DANRE	-0.470467	0.442867	Head
103323	g15141	sp|A4IG66|TM201_DANRE	-0.743938	-0.149374	Not Interesting
103330	g15145	NA	-0.554181	-0.319605	Not Interesting
103349	g15148	sp|Q5R501|OST48_PONAB	0.235221	0.353	Not Interesting
103385	g15160	sp|Q6P3X8|PGBD2_HUMAN	-0.191393	0.612952	Not Interesting
103386	g15160	sp|Q6P3X8|PGBD2_HUMAN	-0.516825	-0.145439	Not Interesting
103414	g15171	sp|P59742|NGB1_ONCMY	-0.594209	-1.11513	Not Interesting
103424	g15173	sp|P86881|NGB_DISMA	-0.13096	-0.788509	Not Interesting
103470	g11408	sp|Q9Z254|GIPC1_RAT	-0.565159	-0.576639	Not Interesting
103501	g10856	NA	0.183455	0.991325	Not Interesting
103524	g6273	NA	-0.709138	-1.00174	Not Interesting
103532	g9701	NA	0.0119374	-0.692029	Not Interesting
103590	g9721	NA	-0.776931	-0.808405	Not Interesting
103591	g9721	NA	-1.14229	-1.11158	Not Interesting
103592	g9722	NA	-1.17878	0.639752	Head
10363	g26728	NA	0.639796	1.13634	Not Interesting
103649	g28899	sp|Q13057|COASY_HUMAN	0.51144	0.231481	Not Interesting
103792	g21238	sp|Q9P2K1|C2D2A_HUMAN	-0.374434	-0.616152	Not Interesting
103892	g28523	NA	-0.445485	-1.04491	Not Interesting
103916	g5911	sp|P47810|WEE1_MOUSE	-1.14942	-1.80994	Not Interesting
103982	g5926	sp|P10076|ZFP26_MOUSE	-0.632123	-1.30525	Not Interesting
103983	g5926	sp|P10076|ZFP26_MOUSE	-0.818352	-1.20131	Not Interesting
104002	g5933	sp|P17276|PH4H_DROME	-0.860226	-0.409239	Not Interesting
104084	g15379	NA	1.72729	2.18888	Not Interesting
1041	g13528	sp|P41935|HM10_CAEEL	0.0472408	0.766209	Not Interesting
104113	g15387	sp|Q566X8|DMX1B_DANRE	-0.482109	-0.597505	Not Interesting
104114	g15387	sp|Q566X8|DMX1B_DANRE	-0.475989	-0.334942	Not Interesting
104120	g15388	NA	-0.569358	-0.398316	Not Interesting
104126	g15389	sp|Q682T9|CALM5_ARATH	-0.755968	-0.781132	Not Interesting
104129	g15390	sp|Q9Y619|ORNT1_HUMAN	-0.23752	-0.786966	Not Interesting
104157	g15407	NA	-0.484575	-0.233428	Not Interesting
10419	g9848	NA	0.125759	0.539693	Not Interesting
104207	g29655	NA	-0.0681313	0.704532	Not Interesting
104209	g29655	NA	-0.150853	0.589813	Not Interesting
104231	g29661	sp|Q6P5G6|UBXN7_MOUSE	0.450884	0.331118	Not Interesting
104239	g29664	NA	0.613178	0.372895	Not Interesting
104283	g31576	NA	0.441748	0.194929	Not Interesting
104310	g19474	NA	-0.169399	-0.514275	Not Interesting
104324	g19476	NA	-0.425631	-0.717658	Not Interesting
104367	g19497	NA	0.385957	0.436202	Not Interesting
104396	g19502	sp|Q5RID7|SNX17_DANRE	-0.540551	-0.794674	Not Interesting
104429	g19513	sp|Q8WQI5|RS8_SPOFR	0.842461	0.534483	Not Interesting
104475	g24010	sp|Q4KMJ1|CHAC2_DANRE	-0.467408	-0.645349	Not Interesting
1045	g13529	NA	1.73149	1.96778	Not Interesting
10452	g9871	sp|Q6P2K6|P4R3A_MOUSE	0.18307	0.563879	Not Interesting
104527	g24023	sp|Q566L7|LS14B_XENTR	0.424326	0.186723	Not Interesting
104549	g24035	NA	0.996656	1.95031	Not Interesting
104555	g24036	NA	0.524951	2.1009	Not Interesting
104563	g24037	NA	0.884728	1.70308	Not Interesting
104565	g24037	NA	0.411166	0.713869	Not Interesting
104571	g24037	NA	-0.824794	-0.578943	Not Interesting
104582	g24040	sp|P41105|RL28_MOUSE	0.862671	0.47836	Not Interesting
104651	g224	NA	-0.654291	-0.316547	Not Interesting
104653	g224	NA	-0.284639	-0.525201	Not Interesting
10466	g9879	sp|Q95NT6|MTH2_DROYA	-0.696222	-0.748776	Not Interesting
104665	g227	sp|P15388|KCNC1_MOUSE	-0.523027	0.325637	Head
104718	g24542	sp|Q95KH6|RGF1C_MACFA	-0.627326	-0.875796	Not Interesting
104770	g9520	sp|P13797|PLST_HUMAN	1.34378	2.0056	Not Interesting
104773	g9521	sp|Q4V9P6|ADAL_DANRE	0.39535	0.504541	Not Interesting
104812	g9539	sp|P21328|RTJK_DROME	0.450193	0.250043	Not Interesting
104825	g9542	sp|Q6GL75|DCC1_XENTR	-0.57854	-0.418258	Not Interesting
104826	g9542	sp|Q6GL75|DCC1_XENTR	-0.490475	-0.608713	Not Interesting
104828	g9543	sp|O55164|MPDZ_RAT	-0.728365	-0.91964	Not Interesting
104841	g9550	NA	-0.414213	0.591225	Head
104843	g9550	NA	0.730306	1.60677	Not Interesting
104846	g9551	sp|P38978|KS1_HYDVU	-0.393279	-0.455378	Not Interesting
10488	g9882	NA	-1.37944	-0.616915	Not Interesting
104916	g27080	sp|Q8BGK5|S35F1_MOUSE	-0.699649	-0.25618	Not Interesting
104923	g27080	sp|Q8BGK5|S35F1_MOUSE	-0.592486	-0.899564	Not Interesting
104924	g27080	sp|Q8BGK5|S35F1_MOUSE	-0.538247	-0.418522	Not Interesting
104990	g27095	NA	-0.810537	-1.0695	Not Interesting
105004	g27100	sp|Q9JLV1|BAG3_MOUSE	0.427076	0.36655	Not Interesting
105038	g27119	NA	-0.391512	-0.650751	Not Interesting
105039	g27119	NA	-0.978429	-1.95837	Not Interesting
105056	g32680	sp|Q5E965|C56D2_BOVIN	-0.13977	0.603972	Head
105069	g32685	sp|Q9BYN7|ZN341_HUMAN	0.406324	0.440331	Not Interesting
105130	g32707	sp|Q9NQC3|RTN4_HUMAN	-0.98094	-1.2911	Not Interesting
10515	g7468	NA	-0.255375	-0.507836	Not Interesting
105189	g18777	NA	-0.57823	0.0393273	Not Interesting
105198	g18779	sp|Q61041|NPY4R_MOUSE	-1.14324	-1.78924	Not Interesting
105199	g18779	sp|Q61041|NPY4R_MOUSE	-1.40397	-1.21711	Not Interesting
105200	g18779	sp|Q61041|NPY4R_MOUSE	-0.474906	-0.702558	Not Interesting
105201	g18779	sp|Q61041|NPY4R_MOUSE	-0.721805	-1.01843	Not Interesting
105290	g11925	sp|Q9BUZ4|TRAF4_HUMAN	-0.567178	-0.294995	Not Interesting
105308	g11929	sp|Q8WMY2|FPPS_BOVIN	-0.154124	-0.300452	Not Interesting
105341	g11950	sp|Q8CFH6|SIK2_MOUSE	0.486133	1.16229	Not Interesting
105342	g11950	sp|Q8CFH6|SIK2_MOUSE	0.363193	0.435141	Not Interesting
105351	g11951	NA	0.0390132	0.656872	Not Interesting
105479	g12000	sp|Q9CXY1|TM175_MOUSE	-1.26883	-1.1365	Not Interesting
105512	g12014	NA	-1.14697	-1.26528	Not Interesting
105577	g23730	sp|Q28735|TMEDA_RABIT	-0.540745	-0.812295	Not Interesting
105580	g23731	NA	-1.08432	-1.11044	Not Interesting
105611	g23740	NA	-0.474647	-0.773447	Not Interesting
105627	g23746	sp|P21328|RTJK_DROME	0.978282	0.661642	Not Interesting
105665	g23752	NA	-1.02583	-0.783822	Not Interesting
10568	g7365	NA	0.0896609	0.652202	Not Interesting
105692	g15311	NA	0.405887	0.96681	Not Interesting
105749	g28084	sp|Q6DN12|MCTP2_HUMAN	-0.665445	-1.01394	Not Interesting
105782	g9	NA	-0.408402	-0.488868	Not Interesting
105786	g10	NA	-0.033407	-0.447553	Not Interesting
10579	g7366	NA	-0.505953	-0.670008	Not Interesting
105855	g23	NA	0.630785	0.590623	Not Interesting
105882	g33	sp|Q8BPM2|M4K5_MOUSE	0.618051	0.395418	Not Interesting
105940	g7262	sp|P35224|CTNB_URECA	0.27785	0.778851	Not Interesting
106046	g21597	sp|Q92047|PIMT_DANRE	0.193701	0.459786	Not Interesting
106108	g21613	sp|Q4QQV8|CHMP5_RAT	0.748911	1.29506	Not Interesting
106109	g21613	sp|Q4QQV8|CHMP5_RAT	0.902782	1.56287	Not Interesting
106125	g21527	sp|Q91736|EPB1B_XENLA	-0.386432	-0.755287	Not Interesting
106246	g2713	sp|Q91Y77|MOT10_RAT	-0.422591	-0.188626	Not Interesting
106275	g2717	sp|Q05438|BMR1B_CHICK	-0.244276	1.01253	Head
106282	g2718	sp|Q9QZ67|PPM1D_MOUSE	-0.284956	-0.561544	Not Interesting
10636	g7351	NA	-0.454609	-0.178681	Not Interesting
106360	g24065	NA	0.481054	0.219784	Not Interesting
106370	g24070	sp|P70567|TMOD1_RAT	-0.850256	-1.00164	Not Interesting
106372	g24070	sp|P70567|TMOD1_RAT	-0.348927	-0.775816	Not Interesting
106377	g24071	sp|P32305|5HT7R_RAT	-0.501558	-0.658056	Not Interesting
10645	g7354	NA	0.477223	0.483165	Not Interesting
106452	g17940	sp|Q24799|MYPH_ECHGR	0.221976	-0.583145	Not Interesting
106480	NA	NA	0.855878	0.451245	Not Interesting
106539	g13406	sp|Q75N73|S39AE_MOUSE	-0.611055	-0.379919	Not Interesting
106543	g13406	sp|Q75N73|S39AE_MOUSE	-0.61872	-0.495174	Not Interesting
10716	g9932	NA	0.563792	0.674054	Not Interesting
10755	g20052	sp|Q6PAX2|ATD3B_XENLA	-0.578422	-0.713996	Not Interesting
10827	g17392	sp|Q4R7D3|SAXO1_MACFA	-0.451334	-0.607857	Not Interesting
10836	g17395	sp|Q63060|GLPK_RAT	-0.601233	0.00828953	Not Interesting
10839	g17396	NA	-0.071455	-0.805589	Not Interesting
10840	g17396	NA	0.419639	-1.3243	Foot
10851	NA	NA	0.605068	-0.496906	Foot
10903	g12323	NA	1.55311	1.3695	Not Interesting
10976	g12355	NA	-0.324742	-0.71301	Not Interesting
10977	g12355	NA	-0.608916	-0.472064	Not Interesting
11045	g12368	sp|P16389|KCNA2_HUMAN	-0.243284	-0.644658	Not Interesting
1105	g18272	sp|P03934|TC1A_CAEEL	0.658001	0.772623	Not Interesting
1107	g18272	sp|P03934|TC1A_CAEEL	-0.826161	-0.0971823	Not Interesting
11099	g6256	NA	0.201215	0.578655	Not Interesting
11103	g6258	NA	-0.53457	-0.152287	Not Interesting
11127	g21476	sp|P25931|NPYR_DROME	-0.519419	0.309537	Head
11130	g21478	NA	-1.02864	0.119269	Head
11151	g21479	sp|A1ZAX0|CCH1R_DROME	-0.269791	0.493581	Head
11154	g21482	sp|Q7JQ07|MOS1T_DROMA	-0.384019	-0.504466	Not Interesting
11175	g21488	sp|O57422|OPN4B_XENLA	-0.908337	-0.134338	Not Interesting
11179	g21488	sp|O57422|OPN4B_XENLA	-0.807134	0.088456	Not Interesting
11197	g21492	sp|P08116|PVA_PLAFA	-1.29644	-0.240571	Not Interesting
11199	g21492	sp|P08116|PVA_PLAFA	-0.550476	0.0386386	Not Interesting
11201	g21492	sp|P08116|PVA_PLAFA	-0.820063	-0.0114365	Not Interesting
11202	g21492	sp|P08116|PVA_PLAFA	-1.7119	0.532991	Not Interesting
11204	g21493	sp|P35072|TCB1_CAEBR	-0.482974	-0.0335348	Not Interesting
11231	g21508	NA	0.940246	2.45102	Head
11241	NA	NA	-0.406536	-0.568722	Not Interesting
11316	g15451	sp|P47799|FSHR_HORSE	0.850393	-0.146168	Not Interesting
11340	g15457	sp|O35815|ATX3_RAT	-0.487697	-0.339577	Not Interesting
11343	g15457	sp|O35815|ATX3_RAT	-0.0770161	-0.668685	Not Interesting
11459	g19999	NA	-0.831567	-0.907206	Not Interesting
11518	g5851	sp|Q8C172|CERS6_MOUSE	-0.335597	-0.596205	Not Interesting
11542	g33323	NA	-0.431862	-0.646849	Not Interesting
11563	g23011	sp|Q9NWH7|SPAT6_HUMAN	-0.652916	-0.268285	Not Interesting
11616	g23029	sp|Q5F2F2|ABH15_MOUSE	-0.0758967	0.798076	Head
11620	g23030	sp|P31696|AGRIN_CHICK	-0.690777	0.421324	Head
11644	g22580	NA	-0.536707	-0.677064	Not Interesting
11656	g22584	sp|Q5ZIM6|AATF_CHICK	-0.531812	0.45306	Head
11657	g22584	sp|Q5ZIM6|AATF_CHICK	-0.575144	-0.217804	Not Interesting
11660	g22585	sp|Q91Z46|DUS7_MOUSE	0.27602	0.834467	Not Interesting
11690	g29219	sp|P35072|TCB1_CAEBR	-0.655941	-0.412738	Not Interesting
11724	g29234	sp|Q28E95|SH3R1_XENTR	-0.29892	-0.647947	Not Interesting
11743	g29242	NA	-0.883161	-0.932995	Not Interesting
11760	g29250	sp|Q3UTQ8|CDKL5_MOUSE	0.284667	0.883021	Not Interesting
11767	g29257	sp|Q8SQ72|SGCG_CANLF	0.943399	1.74737	Not Interesting
11800	g29264	sp|Q14185|DOCK1_HUMAN	-0.698904	-0.708325	Not Interesting
11805	g29265	sp|Q9DGG6|ADCY9_CHICK	-0.445327	-0.522336	Not Interesting
11813	g29266	sp|P51830|ADCY9_MOUSE	-0.396031	-0.637214	Not Interesting
11815	g29266	sp|P51830|ADCY9_MOUSE	-0.416309	-0.951853	Not Interesting
11852	g29283	NA	-0.245251	0.553625	Head
11853	g29284	sp|Q9NBX4|RTXE_DROME	-1.06003	-0.452545	Not Interesting
11869	g29288	NA	-0.840145	-0.532919	Not Interesting
11906	g29298	sp|Q9VZW5|FMAR_DROME	-1.32211	-1.42254	Not Interesting
11918	g29299	sp|Q9D0F3|LMAN1_MOUSE	0.924065	0.539285	Not Interesting
11983	g29317	sp|Q6DCX5|PCFT_XENLA	-0.325734	-0.460228	Not Interesting
12017	g29326	NA	0.220576	0.853258	Not Interesting
12028	g29330	sp|Q28CQ7|SUV92_XENTR	0.706186	1.1065	Not Interesting
12041	g29332	sp|O15974|OPSD2_MIZYE	-1.10155	0.311966	Head
12051	g29334	sp|H3ZPL1|ARAT1_THELN	0.612664	0.475484	Not Interesting
12086	g1351	NA	-0.98627	-0.437471	Not Interesting
12087	g1351	NA	-1.21424	-0.824442	Not Interesting
12089	g1351	NA	-0.694654	0.087603	Head
12090	g1351	NA	-0.796463	0.0980673	Head
12094	g1352	NA	-0.0648729	0.567303	Not Interesting
12098	g1354	sp|Q8WXI2|CNKR2_HUMAN	1.02401	0.650967	Not Interesting
12117	g1359	NA	0.795449	0.771684	Not Interesting
12150	g1510	NA	0.359873	0.194913	Not Interesting
12162	g1513	sp|Q08699|RS14_PODCA	0.582443	0.32957	Not Interesting
12192	g30700	sp|Q9BY84|DUS16_HUMAN	0.313649	0.938176	Not Interesting
12198	g30702	sp|Q4R3M6|NDUS5_MACFA	-0.404197	-0.766299	Not Interesting
12218	g30705	sp|Q3ZCU0|YK006_HUMAN	0.468653	0.435239	Not Interesting
12248	g30709	sp|A6QPN6|GILT_BOVIN	-1.28756	0.579328	Head
12287	g30724	NA	-0.426413	-0.931357	Not Interesting
12293	g30727	sp|Q9NBX4|RTXE_DROME	0.338103	0.456137	Not Interesting
12294	g30728	NA	-0.0227035	0.542251	Not Interesting
12295	g30728	NA	0.127935	1.29396	Head
12387	g13309	sp|P41252|SYIC_HUMAN	0.409765	0.690207	Not Interesting
12394	g4995	sp|P63079|GBRB3_RAT	0.417737	0.318192	Not Interesting
12544	g32930	sp|Q2U7A3|ACT_ASPOR	-0.694029	-0.73295	Not Interesting
12548	g32930	sp|Q2U7A3|ACT_ASPOR	-0.553347	-0.170277	Not Interesting
12769	g9285	sp|O75132|ZBED4_HUMAN	-0.285224	-0.442246	Not Interesting
1277	g23834	sp|Q640L2|SPX3_XENLA	-0.641846	-0.839836	Not Interesting
12811	g6414	sp|A6NHR9|SMHD1_HUMAN	-0.439993	-0.413361	Not Interesting
12812	g6415	sp|Q11075|YWV1_CAEEL	-0.547428	0.928331	Head
12820	g6417	sp|Q9CZR2|NALD2_MOUSE	0.0445347	-1.12447	Not Interesting
12821	g6417	sp|Q9CZR2|NALD2_MOUSE	0.136832	0.457124	Not Interesting
12895	g9809	sp|Q53FV1|ORML2_HUMAN	-0.638045	0.00957204	Not Interesting
12925	g9814	NA	-0.593292	-0.219759	Not Interesting
12938	g9815	sp|P0C1Q2|PDE11_MOUSE	-0.430157	-0.470905	Not Interesting
12967	g9820	NA	0.361719	1.30064	Not Interesting
12968	g9820	NA	0.0833781	0.368566	Not Interesting
13019	g9830	NA	-0.108656	-0.741105	Not Interesting
13020	g9830	NA	-0.312133	-0.485889	Not Interesting
13044	g9835	sp|Q9I8S4|AZIN2_XENLA	-0.308368	-0.643728	Not Interesting
13045	g9835	sp|Q9I8S4|AZIN2_XENLA	-0.960138	-0.500301	Not Interesting
13061	g29097	NA	-1.36844	-1.17332	Not Interesting
13082	g29099	sp|B8VIW9|FP_ACRMI	0.104127	0.880327	Head
13131	g19215	NA	0.00386663	-0.893548	Not Interesting
13157	g19218	NA	-0.390902	-0.557388	Not Interesting
13169	g19220	NA	-0.686447	-0.979876	Not Interesting
13170	g19220	NA	-1.7162	-2.11863	Not Interesting
13177	g19221	NA	-0.234552	-0.848436	Not Interesting
13179	g19221	NA	-0.298931	-0.432226	Not Interesting
13193	g19222	NA	-0.687003	0.743642	Head
13200	g19223	NA	-0.626418	-0.470415	Not Interesting
13210	g19229	NA	-0.362856	-0.588043	Not Interesting
13237	g19232	NA	0.425106	0.65395	Not Interesting
1327	g11049	sp|P35072|TCB1_CAEBR	-0.713399	-0.179599	Not Interesting
1328	g11049	sp|P35072|TCB1_CAEBR	-1.93753	0.265141	Head
13283	g19240	NA	0.101239	2.00833	Head
13312	g9691	sp|Q9VHR6|ATG13_DROME	0.518949	1.22724	Not Interesting
13317	g9693	sp|P18503|CAS4_EPHMU	0.406595	1.55073	Not Interesting
13322	g9693	sp|P18503|CAS4_EPHMU	-0.089676	0.844917	Head
13337	g9694	sp|Q6I6M7|FGF1_CYNPY	0.220726	0.653616	Not Interesting
13338	g9694	sp|Q6I6M7|FGF1_CYNPY	0.13566	0.719895	Not Interesting
13444	g19984	sp|Q02225|SKI_XENLA	-1.14951	-0.52329	Not Interesting
13445	g19984	sp|Q02225|SKI_XENLA	-1.66965	-0.352704	Head
13447	g19984	sp|Q02225|SKI_XENLA	-1.26896	0.0618584	Head
13448	g19984	sp|Q02225|SKI_XENLA	-0.570922	-0.61978	Not Interesting
13449	g19984	sp|Q02225|SKI_XENLA	-0.618567	0.169616	Head
1345	g11056	NA	-0.0613928	-0.557574	Not Interesting
13450	g19984	sp|Q02225|SKI_XENLA	-0.330048	-0.087931	Not Interesting
1347	g11056	NA	-0.0868831	-0.684084	Not Interesting
13534	g22631	sp|Q58A42|DD3_DICDI	-1.01362	-0.0720828	Not Interesting
13535	g22633	sp|P34275|IVD_CAEEL	-1.20663	0.482531	Head
13552	g22637	NA	-0.946122	-0.533328	Not Interesting
13556	g22638	NA	-0.666789	-1.08734	Not Interesting
13586	g22646	sp|P0CH95|PHF8_DANRE	-0.638813	0.780775	Head
1359	g11058	sp|C4R7Z3|C9MT_KOMPG	-0.419212	-0.328458	Not Interesting
13590	g22646	sp|P0CH95|PHF8_DANRE	-0.838009	-1.22966	Not Interesting
13592	g22646	sp|P0CH95|PHF8_DANRE	-0.356308	-0.580683	Not Interesting
13600	g22647	NA	-0.000634702	0.689804	Head
13601	g22647	NA	0.115782	2.08717	Head
13623	g22652	NA	0.897025	1.84744	Not Interesting
13636	g22656	sp|Q59WG5|Y2336_CANAL	-0.492482	-0.304608	Not Interesting
13641	g22657	sp|Q3ZCU0|YK006_HUMAN	-0.897159	-0.637107	Not Interesting
13642	g22657	sp|Q3ZCU0|YK006_HUMAN	-0.396921	-0.96061	Not Interesting
1365	g11059	sp|Q9BQI7|PSD2_HUMAN	-0.0392041	-0.828654	Not Interesting
13669	g22663	NA	-0.925793	-0.286427	Not Interesting
13671	g22664	NA	-0.753847	-0.206542	Not Interesting
13695	g22671	sp|Q12792|TWF1_HUMAN	-0.641142	-0.725834	Not Interesting
13710	g22674	NA	-0.357086	-0.318491	Not Interesting
13713	g22675	NA	-0.66924	-0.412543	Not Interesting
13728	g22677	sp|Q8IWV2|CNTN4_HUMAN	-0.404439	-0.549898	Not Interesting
13789	g22695	NA	0.334483	0.639958	Not Interesting
13864	g234	sp|P05933|CALM_SCHPO	-1.0301	-0.537605	Not Interesting
13873	g236	sp|Q02104|LIP1_PSYIM	-0.0993137	0.309354	Not Interesting
13886	g240	sp|P25325|THTM_HUMAN	1.38398	1.74933	Not Interesting
13906	g245	sp|A7MB28|NDRG3_BOVIN	0.520403	1.21179	Not Interesting
13917	g247	sp|O15160|RPAC1_HUMAN	0.337703	0.206433	Not Interesting
13948	g268	sp|Q5REW1|IYD1_PONAB	-0.608733	-0.520569	Not Interesting
13950	g269	sp|Q9BGT1|TTC9C_MACFA	1.12412	1.37903	Not Interesting
13969	g278	sp|Q4R3D6|ZMYM5_MACFA	0.0130646	0.480939	Not Interesting
13994	g14067	sp|Q3UYK3|TBCD9_MOUSE	-0.447085	-0.559232	Not Interesting
14054	g14090	NA	0.827148	0.418674	Not Interesting
14057	g14092	sp|P86854|PLCL_MYTGA	-0.52768	-0.422839	Not Interesting
14111	g18232	sp|Q9Y2U5|M3K2_HUMAN	1.18413	0.622469	Not Interesting
14197	g31198	sp|Q8R4T9|UT2_MOUSE	-0.288828	1.17006	Head
14200	g31198	sp|Q8R4T9|UT2_MOUSE	0.0842484	1.24458	Not Interesting
1423	g6615	NA	-0.683044	-0.281247	Not Interesting
14231	g20059	NA	-0.908635	-0.430551	Not Interesting
14248	g20062	sp|P18761|CAH6_MOUSE	-0.472461	-0.462767	Not Interesting
14282	g20074	sp|Q6DDT1|INO1B_XENLA	0.604999	0.308248	Not Interesting
14300	g20080	sp|P00491|PNPH_HUMAN	0.610325	0.935881	Not Interesting
14315	g20083	sp|O57525|CP17A_RANDY	0.868497	2.20012	Not Interesting
14390	g20102	NA	-0.239655	-0.653104	Not Interesting
14469	g20118	NA	0.0450532	0.55859	Not Interesting
14470	g20118	NA	-0.0364943	0.474298	Not Interesting
14500	g20127	sp|Q64514|TPP2_MOUSE	0.361129	0.318139	Not Interesting
14565	g21749	sp|P21328|RTJK_DROME	-0.33104	-0.585031	Not Interesting
14632	g21761	sp|Q9Y5R5|DMRT2_HUMAN	-0.83652	-0.0771715	Not Interesting
14634	g21761	sp|Q9Y5R5|DMRT2_HUMAN	-1.11961	0.0777786	Head
14635	g21761	sp|Q9Y5R5|DMRT2_HUMAN	-0.694607	0.686649	Head
14636	g21761	sp|Q9Y5R5|DMRT2_HUMAN	-0.346102	-0.478999	Not Interesting
14729	g21792	NA	0.828103	0.693837	Not Interesting
14733	g21793	NA	-1.039	-0.638517	Not Interesting
14770	g21807	sp|Q6AXJ9|CDKL1_DANRE	-0.946467	-0.470822	Not Interesting
14802	g21818	NA	-0.383697	-0.550248	Not Interesting
14841	g22270	sp|Q9JIX8|ACINU_MOUSE	0.435922	0.307306	Not Interesting
14852	g22276	sp|P30664|MCM4B_XENLA	-0.360279	-0.663314	Not Interesting
14881	g24469	NA	-1.30417	-1.29943	Not Interesting
14883	g24469	NA	-0.07565	-0.606796	Not Interesting
14894	g24469	NA	-0.195535	-0.835666	Not Interesting
14938	g3220	sp|Q9TWL9|COMA_CONMA	0.32157	0.82982	Not Interesting
14944	g3221	sp|Q7T2H2|FGRL1_CHICK	-0.0834914	-0.455519	Not Interesting
14971	g3229	NA	0.291369	0.855061	Not Interesting
15007	g12118	NA	-0.350168	-0.850457	Not Interesting
15038	g9381	NA	-0.520716	-0.692221	Not Interesting
1506	g6635	sp|Q7Z7L7|ZER1_HUMAN	-0.890606	-0.24721	Not Interesting
1507	g6635	sp|Q7Z7L7|ZER1_HUMAN	-0.572627	-0.261445	Not Interesting
15175	g13666	NA	-1.58599	-1.2754	Not Interesting
15179	g13667	sp|Q587J7|TDR12_HUMAN	0.565017	0.190494	Not Interesting
15232	NA	NA	-0.554974	-0.234301	Not Interesting
15288	g27925	sp|D2IYS2|TORSO_BOMMO	0.52066	0.830961	Not Interesting
15351	g27960	NA	-0.206629	-0.622363	Not Interesting
15352	g27960	NA	-0.552011	-2.27649	Not Interesting
15367	g9102	sp|Q00534|CDK6_HUMAN	-0.345324	-0.729019	Not Interesting
15380	g9106	NA	0.219366	0.476553	Not Interesting
15400	g9114	NA	-0.293461	-0.443114	Not Interesting
15409	g32575	NA	-0.971801	-1.01178	Not Interesting
15410	g32575	NA	-0.790411	-0.617345	Not Interesting
1544	g6648	sp|Q9C0J1|B3GN4_HUMAN	-0.605708	-0.862173	Not Interesting
15475	g13927	NA	-0.477777	0.385211	Head
15538	g13937	NA	-0.726429	-0.812349	Not Interesting
15548	g13940	NA	-0.707642	-1.04598	Not Interesting
15566	g13950	NA	-0.556068	-0.983451	Not Interesting
15638	g8428	NA	0.430038	0.768389	Not Interesting
15691	g32915	sp|Q28C98|MESH1_XENTR	0.838516	0.654812	Not Interesting
15705	g32919	NA	-0.738711	-0.725358	Not Interesting
15716	g32919	NA	-0.712506	-1.17479	Not Interesting
15717	g32919	NA	-0.709698	-1.31595	Not Interesting
15718	g32919	NA	-0.363832	-0.708196	Not Interesting
15784	g7459	sp|P78325|ADAM8_HUMAN	-0.225242	-0.859893	Not Interesting
15786	g7459	sp|P78325|ADAM8_HUMAN	-0.467956	0.566346	Head
15799	g153	NA	0.0204135	0.647028	Not Interesting
15824	g160	NA	-0.669406	0.706991	Head
15836	g167	NA	-0.697785	-1.15683	Not Interesting
15893	g187	sp|Q96ES7|SGF29_HUMAN	-0.500645	-0.653132	Not Interesting
15915	g196	sp|Q9PV90|RLA0_DANRE	0.56553	0.337988	Not Interesting
15961	g213	NA	-0.597895	-0.106187	Not Interesting
15987	g4665	sp|Q2HJ23|MLP3A_BOVIN	-0.377302	0.577686	Head
16006	g4670	NA	0.598291	0.0902837	Not Interesting
16008	g4670	NA	0.0623843	-0.928815	Foot
16023	g4672	sp|P08016|EGGS_SCHMA	-0.312189	0.789044	Head
16048	g4679	sp|Q7U6F4|RIMK_SYNPX	-0.538147	-0.179667	Not Interesting
16061	g14003	sp|O35607|BMPR2_MOUSE	-0.393601	-0.252719	Not Interesting
16064	g14003	sp|O35607|BMPR2_MOUSE	-0.431434	-0.678367	Not Interesting
16096	g1738	NA	0.062797	-1.50547	Not Interesting
1610	g3605	NA	-0.0863724	1.22237	Head
16107	g1742	sp|Q5XXP2|OPN4_PHOSU	0.374013	0.863813	Not Interesting
16108	g1742	sp|Q5XXP2|OPN4_PHOSU	-0.132784	0.949453	Head
16111	g1743	sp|Q16363|LAMA4_HUMAN	1.64902	1.56461	Not Interesting
1617	g3604	sp|Q01063|PDE4D_MOUSE	-0.464325	-0.443454	Not Interesting
16172	g1757	NA	0.658285	1.07278	Not Interesting
16186	g1760	sp|P61294|RAB6B_MOUSE	-0.312889	-0.801582	Not Interesting
1619	g3607	sp|Q9H5L6|THAP9_HUMAN	-0.288074	-0.457156	Not Interesting
16196	g1764	NA	-0.723423	-1.03909	Not Interesting
16197	g1765	sp|Q9Y376|CAB39_HUMAN	-0.691117	-0.719469	Not Interesting
16198	g1765	sp|Q9Y376|CAB39_HUMAN	-0.517609	-0.941677	Not Interesting
16209	g1768	sp|Q6GP53|NAA50_XENLA	-0.60391	0.291697	Head
16289	g1803	NA	-1.00943	-1.6106	Not Interesting
1633	g3617	NA	0.479289	0.312291	Not Interesting
16348	g1836	sp|Q8AWH3|SX17A_XENTR	-0.548685	-0.349984	Not Interesting
16395	g1849	NA	-1.01312	0.703348	Head
16413	g1856	NA	-1.05228	-0.648563	Not Interesting
16428	g1858	sp|Q2Z1R2|SOX1B_DANRE	-1.28206	-0.539514	Not Interesting
16429	g1858	sp|Q2Z1R2|SOX1B_DANRE	-1.55112	-0.971075	Not Interesting
16448	g1868	sp|Q02391|GSLG1_CHICK	-0.623023	-0.291293	Not Interesting
16449	g1868	sp|Q02391|GSLG1_CHICK	-1.33329	-1.04131	Not Interesting
16495	g1874	sp|P56945|BCAR1_HUMAN	-0.662757	-0.341789	Not Interesting
16512	g1877	sp|Q6TMK4|POXA_DICDI	-0.260788	0.968271	Head
16535	g1881	sp|O43402|EMC8_HUMAN	-0.0340824	-0.815623	Not Interesting
16567	g30932	sp|O43824|GTPB6_HUMAN	-0.652924	-0.715193	Not Interesting
16598	g6659	sp|Q8HXX6|SAP3_MACFA	-0.101109	1.01529	Not Interesting
16622	g6671	NA	-1.04586	-1.3924	Not Interesting
16644	g13898	sp|Q7PHR1|KIF1A_ANOGA	-0.087677	-0.552528	Not Interesting
16647	g13899	sp|C6KSQ6|RAD50_PLAF7	-1.39974	-1.6642	Not Interesting
16681	g13907	sp|O88866|HUNK_MOUSE	-0.634095	-0.391766	Not Interesting
16686	g13907	sp|O88866|HUNK_MOUSE	-0.517516	-0.236205	Not Interesting
16688	g13907	sp|O88866|HUNK_MOUSE	-0.880809	-0.425414	Not Interesting
16703	g13917	NA	0.849584	1.48537	Not Interesting
16704	g13917	NA	1.22562	1.3476	Not Interesting
16836	g33238	NA	-0.104235	-0.510902	Not Interesting
16862	g33243	sp|P21328|RTJK_DROME	-0.42875	-0.374759	Not Interesting
16880	g33253	sp|Q9Z1P7|KANK3_MOUSE	0.270968	1.23974	Not Interesting
16881	g33253	sp|Q9Z1P7|KANK3_MOUSE	0.0389477	0.538416	Not Interesting
17052	g11736	sp|Q91770|NOT2_XENLA	-0.5754	-0.309956	Not Interesting
17072	g11745	sp|Q90623|MYPT1_CHICK	-0.995112	0.187934	Head
17075	g11745	sp|Q90623|MYPT1_CHICK	-0.485484	-0.0169577	Not Interesting
17077	g11745	sp|Q90623|MYPT1_CHICK	-0.599977	-0.135706	Not Interesting
17082	g11746	NA	-0.205149	-0.50334	Not Interesting
17140	g11761	sp|Q9JHX4|CASP8_RAT	-0.246184	-0.481362	Not Interesting
17153	g1680	sp|Q06646|AT5G2_RAT	0.422788	0.0806603	Not Interesting
17194	g1705	sp|Q8N8A2|ANR44_HUMAN	-1.47658	-0.170638	Head
17196	g1705	sp|Q8N8A2|ANR44_HUMAN	0.336681	1.29053	Not Interesting
17256	g33731	sp|P70566|TMOD2_RAT	-1.20209	-1.3729	Not Interesting
17257	g33731	sp|P70566|TMOD2_RAT	-0.700154	-0.164653	Not Interesting
17259	g33731	sp|P70566|TMOD2_RAT	-0.386037	-0.768738	Not Interesting
17261	g33731	sp|P70566|TMOD2_RAT	-1.01858	-1.03154	Not Interesting
17318	g33744	NA	-0.449454	-0.879212	Not Interesting
17321	g33744	NA	-0.163771	-0.884275	Not Interesting
17323	g33744	NA	-0.0713995	-0.738537	Not Interesting
17486	g14267	sp|Q921D9|GRHL1_MOUSE	-0.974725	-1.28538	Not Interesting
17512	g14274	NA	-0.00226515	-0.768153	Not Interesting
17566	g9901	sp|Q95SX7|RTBS_DROME	-0.764216	-0.571994	Not Interesting
17752	g12039	sp|Q505D9|TRI67_MOUSE	-0.533647	-0.567229	Not Interesting
17760	g12041	NA	-0.0619032	0.922134	Not Interesting
17764	g12042	NA	-0.161924	0.814148	Not Interesting
17785	g12048	sp|P62282|RS11_RAT	0.607402	0.374626	Not Interesting
17796	g12055	NA	-0.922798	-0.199331	Not Interesting
17797	g12055	NA	-1.20211	-1.002	Not Interesting
17801	g12056	NA	-0.351614	-0.223995	Not Interesting
17829	g12059	sp|Q8X034|RL15_NEUCR	0.517032	0.270396	Not Interesting
17876	g9565	sp|Q27746|DNMT1_PARLI	-0.891901	0.972158	Head
17877	g9565	sp|Q27746|DNMT1_PARLI	-0.255045	0.504344	Head
1788	g28531	NA	1.003	1.42427	Not Interesting
1793	NA	NA	-0.535276	-0.364794	Not Interesting
17967	g8541	sp|Q9QZD5|RAE2_MOUSE	-0.544693	-1.20427	Not Interesting
17975	g8550	sp|Q9UHC3|ASIC3_HUMAN	-0.868515	-0.654386	Not Interesting
18015	g8566	sp|E9Q414|APOB_MOUSE	0.343126	0.902431	Not Interesting
18039	g8573	NA	-0.860354	-0.292989	Not Interesting
18044	g8574	NA	-0.290655	-0.486406	Not Interesting
18048	g8574	NA	-0.621944	-0.733892	Not Interesting
18049	g8574	NA	-0.982635	-0.975458	Not Interesting
18079	g8589	sp|Q5ZKP7|S2536_CHICK	-0.260559	-0.45441	Not Interesting
18111	g8603	sp|Q6ZR37|PKHG7_HUMAN	-0.236411	-0.564543	Not Interesting
18113	g8603	sp|Q6ZR37|PKHG7_HUMAN	-0.0636352	-0.758896	Not Interesting
18136	g8604	sp|Q58D06|WDR74_BOVIN	-0.942232	-0.977039	Not Interesting
18167	g8608	NA	-0.837238	-0.495789	Not Interesting
1817	g7341	NA	-0.535686	-0.776565	Not Interesting
18220	g32577	sp|P54289|CA2D1_HUMAN	0.135058	0.738778	Head
18239	g32582	sp|Q1W617|SHRM4_MOUSE	-0.156779	-0.81558	Not Interesting
18241	g32582	sp|Q1W617|SHRM4_MOUSE	-0.562865	-0.944232	Not Interesting
18287	NA	NA	-0.244121	-0.323038	Not Interesting
18296	g15773	NA	-0.762194	-0.323975	Not Interesting
18307	g15774	sp|P51577|P2RX4_RAT	0.381004	0.931589	Not Interesting
18380	g26099	NA	-0.522247	-0.912753	Not Interesting
18414	g26107	sp|Q9BQS2|SYT15_HUMAN	-0.527775	-0.708017	Not Interesting
1844	g10564	sp|O00370|LORF2_HUMAN	-0.900475	-0.747848	Not Interesting
18501	g2865	NA	-0.763921	-0.849167	Not Interesting
18517	g2871	NA	-0.304055	-0.782229	Not Interesting
18531	NA	NA	-0.535837	-0.713854	Not Interesting
18539	g17412	sp|Q3V5L5|MGT5B_HUMAN	1.37637	1.31947	Not Interesting
18556	g1007	sp|Q09328|MGT5A_HUMAN	0.831412	0.361568	Not Interesting
18579	g18032	NA	1.26147	1.47343	Not Interesting
18693	g5384	NA	0.465878	1.02641	Not Interesting
18719	g5391	sp|Q8IY22|CMIP_HUMAN	1.74492	0.975824	Not Interesting
18721	g5391	sp|Q8IY22|CMIP_HUMAN	1.57042	0.995445	Not Interesting
18723	g5391	sp|Q8IY22|CMIP_HUMAN	1.05245	0.538539	Not Interesting
18725	g5391	sp|Q8IY22|CMIP_HUMAN	0.79009	0.17272	Not Interesting
18726	g5391	sp|Q8IY22|CMIP_HUMAN	1.51138	0.854359	Not Interesting
18728	g5392	NA	-0.821321	-0.588741	Not Interesting
18742	g5395	sp|P52164|MAX_RAT	0.218814	1.82057	Head
18756	g5398	NA	-0.419076	-0.873216	Not Interesting
1877	g16741	NA	-0.39574	-0.565804	Not Interesting
18789	g65	NA	-0.559948	-0.0978258	Head
18792	g65	NA	-1.2682	-0.926661	Not Interesting
18814	g69	sp|O57460|TLL1_DANRE	0.710492	0.956987	Not Interesting
18829	g70	NA	-0.142765	0.375931	Not Interesting
18862	g11083	NA	1.07389	0.766438	Not Interesting
189	g18917	sp|Q16827|PTPRO_HUMAN	0.606215	0.678206	Not Interesting
1890	g16742	NA	-0.351771	-0.411753	Not Interesting
18948	g25443	NA	-0.402672	-0.686862	Not Interesting
19062	g25501	NA	1.11578	0.377165	Not Interesting
19172	g2514	sp|D3ZEH5|SIDT2_RAT	-0.963738	-1.01919	Not Interesting
19186	g6782	NA	0.713908	0.568452	Not Interesting
19266	g13566	NA	-0.726059	-0.627897	Not Interesting
19321	g16876	sp|A7RU46|NAPA_NEMVE	0.424917	0.63708	Not Interesting
19413	g16907	sp|B3EWZ6|MLRP2_ACRMI	-0.445132	-0.548889	Not Interesting
19504	g21991	sp|Q3T075|STX8_BOVIN	-0.389981	-0.480198	Not Interesting
19508	g21993	sp|P24733|MYS_ARGIR	-0.283068	1.01872	Not Interesting
19516	g21993	sp|P24733|MYS_ARGIR	1.13946	0.217349	Not Interesting
19543	g15763	NA	-0.443824	-1.08755	Not Interesting
19544	g15763	NA	-0.705598	-0.935772	Not Interesting
19601	g13799	NA	-0.489587	0.0454435	Not Interesting
19602	g13799	NA	-0.972497	-0.356493	Not Interesting
19603	g13799	NA	-1.25153	-0.512787	Not Interesting
19605	g13799	NA	-0.624501	-0.681252	Not Interesting
19630	g13803	sp|Q6ING7|FLAD1_XENLA	-0.240157	0.791109	Head
19675	g13814	sp|Q63406|MCF2L_RAT	-0.37892	-0.0882625	Not Interesting
19685	g13823	NA	-0.367756	-0.614297	Not Interesting
19711	g4076	sp|B0BNR5|IF2_ACTPJ	-0.939689	-0.790754	Not Interesting
19734	g4084	sp|Q9QZC7|PKHB2_MOUSE	0.556893	0.248462	Not Interesting
19749	g4091	sp|Q8NB59|SYT14_HUMAN	-0.847469	-0.798636	Not Interesting
1975	g30824	sp|Q08DK7|MCATL_BOVIN	-0.198859	-0.519308	Not Interesting
19819	g23620	sp|P61315|G3ST3_MOUSE	-0.801349	-0.367619	Not Interesting
19823	g23620	sp|P61315|G3ST3_MOUSE	-0.765158	-0.33108	Not Interesting
19899	NA	NA	-0.776013	-0.885637	Not Interesting
19946	g14016	NA	0.585898	0.813388	Not Interesting
19949	g14016	NA	-0.307335	-0.724	Not Interesting
19957	g14018	sp|Q15063|POSTN_HUMAN	-1.3827	-0.349485	Head
19959	g14018	sp|Q15063|POSTN_HUMAN	-0.372922	-0.868415	Not Interesting
19960	g14018	sp|Q15063|POSTN_HUMAN	-0.776832	-0.608108	Not Interesting
19962	g14019	sp|A0JP70|WDR90_XENTR	-0.170485	-0.582516	Not Interesting
19970	g14025	sp|P60670|NPL4_MOUSE	-0.706006	-0.837806	Not Interesting
19986	g14034	NA	0.81598	1.18766	Not Interesting
20106	g7740	sp|Q1ZZH1|GRM3_MACFA	-0.603058	-0.479058	Not Interesting
20139	g10585	sp|Q8IZJ1|UNC5B_HUMAN	-0.00314898	0.922646	Not Interesting
20152	g10588	sp|Q9V785|3BP5H_DROME	-0.195616	0.366581	Head
20153	g10588	sp|Q9V785|3BP5H_DROME	0.819673	0.534298	Not Interesting
20156	g10588	sp|Q9V785|3BP5H_DROME	1.12487	0.805095	Not Interesting
20187	g10594	sp|O35426|XBP1_MOUSE	0.433876	0.215116	Not Interesting
20204	g10596	NA	-0.611706	-0.531643	Not Interesting
20216	g10600	NA	-0.629902	-0.986756	Not Interesting
20219	g10604	sp|P49715|CEBPA_HUMAN	-0.445657	-0.559695	Not Interesting
20220	g10604	sp|P49715|CEBPA_HUMAN	-0.366907	-0.140015	Not Interesting
20282	NA	NA	-0.503076	-0.125748	Not Interesting
203	g18921	sp|Q9YGW7|DAZL_DANRE	-0.275799	1.00535	Head
20302	g7859	sp|P32674|PFLD_ECOLI	0.419816	0.945494	Not Interesting
20316	g7862	NA	0.0259314	0.422783	Not Interesting
20321	g7863	sp|Q66HA4|TAXB1_RAT	0.761101	0.883001	Not Interesting
20346	g7872	sp|Q8R4V5|OIT3_MOUSE	1.57885	1.32405	Not Interesting
20366	g9459	sp|Q7Z3K3|POGZ_HUMAN	-0.706878	-0.345398	Not Interesting
20397	g1266	sp|O16025|AOSL_PLEHO	-0.993495	-0.50657	Not Interesting
20486	g8471	NA	0.131329	0.580334	Not Interesting
20509	g8475	sp|Q5F485|DDX42_CHICK	0.426725	0.627682	Not Interesting
20543	g8486	sp|F1LMZ8|PSD11_RAT	0.517125	0.137603	Not Interesting
20563	g8497	sp|O42350|CO1A2_LITCT	2.10126	1.32304	Not Interesting
20564	g8497	sp|O42350|CO1A2_LITCT	1.74005	0.849572	Not Interesting
20565	g8497	sp|O42350|CO1A2_LITCT	2.05405	1.10441	Not Interesting
20566	g8497	sp|O42350|CO1A2_LITCT	-0.850494	-0.887278	Not Interesting
20579	g8503	NA	-0.977496	-0.943276	Not Interesting
20582	g8504	NA	-0.189612	-0.470198	Not Interesting
2060	g308	sp|O00222|GRM8_HUMAN	-0.928284	-0.839461	Not Interesting
20663	g2057	NA	-0.551008	-0.349345	Not Interesting
20705	g25546	NA	-0.596222	-0.656957	Not Interesting
20708	g25548	NA	-0.501084	-0.626694	Not Interesting
20727	g25556	sp|A7E2S9|A30BL_HUMAN	0.598174	0.418317	Not Interesting
20730	g25556	sp|A7E2S9|A30BL_HUMAN	0.264387	0.824057	Not Interesting
20736	g25557	sp|Q9H1Y3|OPN3_HUMAN	-0.593957	-1.03425	Not Interesting
20756	g25565	sp|Q8AVY1|ODF3A_XENLA	-0.400011	-0.706722	Not Interesting
20789	g25574	NA	0.264562	0.784869	Not Interesting
20819	g25579	NA	0.162532	1.30997	Not Interesting
20884	g12906	sp|Q02556|IRF8_HUMAN	-0.228226	-0.641249	Not Interesting
20911	g12918	NA	-0.627017	-0.224506	Not Interesting
20919	g12926	NA	-0.50524	-0.728489	Not Interesting
21000	g12945	NA	-0.629218	-0.384687	Not Interesting
21031	g12951	NA	-0.409069	-0.614849	Not Interesting
21048	g12966	NA	-0.0267809	0.496061	Not Interesting
21084	g5147	NA	-0.530635	0.401096	Head
21086	g5147	NA	-0.0623844	1.752	Head
21087	g5148	NA	-0.174739	0.784645	Head
21100	g5150	sp|Q12802|AKP13_HUMAN	-0.197761	0.74824	Not Interesting
21160	g21719	NA	0.619568	0.864845	Not Interesting
2119	g321	NA	0.55618	0.704563	Not Interesting
21228	g23844	NA	0.138243	-0.972769	Not Interesting
21246	g23847	sp|Q2KN96|CYTSA_XENTR	-0.89309	-0.499822	Not Interesting
21315	g23869	NA	-1.04938	-0.623638	Not Interesting
21316	g23869	NA	-0.555725	-0.458526	Not Interesting
21358	g17928	NA	-0.929716	0.321561	Head
21413	g30660	sp|Q91WL6|SNX11_MOUSE	-0.239973	-0.675072	Not Interesting
2142	g324	NA	-0.224379	-0.780669	Not Interesting
21439	g30671	sp|J3S6Y1|TSEAR_MOUSE	-0.424667	-0.776004	Not Interesting
21444	g30671	sp|J3S6Y1|TSEAR_MOUSE	-1.54485	-1.59287	Not Interesting
21470	g17459	sp|O60308|CE104_HUMAN	0.115498	0.483187	Not Interesting
21510	g17465	sp|Q9H8Y8|GORS2_HUMAN	0.940185	0.485479	Not Interesting
21544	g30616	sp|P16562|CRIS2_HUMAN	-0.465297	-0.247199	Not Interesting
21572	g20713	sp|Q3A258|RIMK_PELCD	-0.219633	-0.617983	Not Interesting
21628	g20728	sp|P22897|MRC1_HUMAN	-0.472847	-0.49417	Not Interesting
21630	g20728	sp|P22897|MRC1_HUMAN	-0.676736	-0.540041	Not Interesting
21677	g13741	sp|Q27433|MEC2_CAEEL	0.58217	0.184222	Not Interesting
21694	g28429	NA	0.135729	1.22676	Head
217	g18923	NA	-0.0652111	-0.874514	Not Interesting
21701	g28430	NA	-0.871825	-0.260076	Not Interesting
21710	g28434	sp|P35072|TCB1_CAEBR	0.155857	0.97146	Not Interesting
21735	NA	NA	0.929066	0.632805	Not Interesting
218	g18923	NA	-0.333273	-0.640281	Not Interesting
2183	g334	sp|Q9BUZ4|TRAF4_HUMAN	-0.53252	-0.371981	Not Interesting
21830	g9992	NA	0.287596	1.04224	Not Interesting
21833	g9992	NA	0.353164	0.668695	Not Interesting
21837	g9993	NA	-0.623832	-0.289487	Not Interesting
21838	g9993	NA	-0.0141967	1.13629	Head
21839	g9993	NA	-0.916389	0.663307	Head
21842	g9994	sp|Q2W2L2|RS11_MAGSA	-0.804218	-0.473814	Not Interesting
21843	g9994	sp|Q2W2L2|RS11_MAGSA	-0.914246	2.8659	Head
21844	g9994	sp|Q2W2L2|RS11_MAGSA	-0.522188	-0.114073	Not Interesting
21845	g9994	sp|Q2W2L2|RS11_MAGSA	-1.50691	4.05249	Head
21846	g9994	sp|Q2W2L2|RS11_MAGSA	-0.279096	0.845224	Head
21847	g9994	sp|Q2W2L2|RS11_MAGSA	-0.334037	0.895712	Head
21890	g10014	sp|P55199|ELL_HUMAN	-0.247783	-0.449096	Not Interesting
21906	g10018	sp|Q4I963|COFI_GIBZE	0.467428	-0.309535	Foot
21920	g10022	sp|Q91W67|UBL7_MOUSE	-0.809642	-0.505572	Not Interesting
21980	g10047	sp|Q9UUC1|RL21A_SCHPO	0.63372	0.334863	Not Interesting
22049	g10067	NA	-0.483284	-0.419931	Not Interesting
22051	g10067	NA	-0.685533	-0.39461	Not Interesting
22153	g10106	sp|Q96PZ7|CSMD1_HUMAN	-0.495248	-0.488975	Not Interesting
22225	g16586	NA	-1.2636	-0.406745	Not Interesting
22252	g33693	sp|P18428|LBP_HUMAN	0.250875	0.870299	Not Interesting
22253	g33693	sp|P18428|LBP_HUMAN	-0.531074	0.097321	Not Interesting
22316	g33714	sp|Q9P2F6|RHG20_HUMAN	-0.318694	-0.373221	Not Interesting
22379	g31978	sp|Q9VUW9|HIP14_DROME	-0.358764	-0.202914	Not Interesting
22393	g31982	sp|Q9YHD3|BAG6A_XENLA	0.557972	2.01492	Not Interesting
22456	g26540	sp|Q6R2W3|SCND3_HUMAN	-0.462252	-0.855407	Not Interesting
22477	g21462	NA	-0.784737	-0.102756	Not Interesting
22488	g21463	NA	-0.719024	0.0660274	Not Interesting
22492	g21464	sp|Q9HCI6|K1586_HUMAN	0.832243	0.228123	Not Interesting
22585	g4288	sp|A7RRG3|AKTIP_NEMVE	0.417685	0.875645	Not Interesting
22593	g4292	NA	0.282612	0.724002	Not Interesting
2260	g374	NA	-0.406078	-0.383625	Not Interesting
22632	g11186	NA	-1.07029	-0.0734822	Not Interesting
22700	g11211	sp|Q95SX7|RTBS_DROME	-0.710187	0.0392815	Not Interesting
22741	g29101	sp|P79282|FUT8_PIG	-0.795597	-0.425155	Not Interesting
22742	g29101	sp|P79282|FUT8_PIG	-0.322928	-0.765653	Not Interesting
22743	g29101	sp|P79282|FUT8_PIG	-0.27576	-0.626	Not Interesting
22765	g29109	sp|O60921|HUS1_HUMAN	0.0117201	0.931471	Not Interesting
22804	g29124	sp|Q96B97|SH3K1_HUMAN	-0.0218024	0.905119	Not Interesting
22861	g29132	sp|Q9Y6P5|SESN1_HUMAN	-0.496073	-0.393395	Not Interesting
22934	g29153	sp|Q99LZ3|SLD5_MOUSE	-0.687375	-0.580493	Not Interesting
22936	g29153	sp|Q99LZ3|SLD5_MOUSE	0.877862	0.873172	Not Interesting
2294	g387	sp|Q9VXN0|GTDC1_DROME	0.365481	0.805092	Not Interesting
23012	g1956	sp|Q95029|CATL_DROME	0.290824	0.579035	Not Interesting
23086	g15825	sp|P41823|SY65_APLCA	-1.0334	-0.590835	Not Interesting
23091	g15826	sp|Q16659|MK06_HUMAN	-0.422826	-0.769269	Not Interesting
23095	g15827	NA	-1.07691	0.171891	Head
23108	g15830	sp|Q5RDG4|PDIA3_PONAB	-0.539708	-0.366624	Not Interesting
23110	g15830	sp|Q5RDG4|PDIA3_PONAB	0.438197	0.521894	Not Interesting
23127	g15839	sp|Q9D305|THAP2_MOUSE	0.436874	0.250454	Not Interesting
23129	g15840	sp|Q29H56|MAB21_DROPS	-0.267505	-0.822386	Not Interesting
23144	g15841	sp|Q90705|EF2_CHICK	0.441349	0.301877	Not Interesting
23160	g15856	NA	-0.659915	-0.676586	Not Interesting
23181	g15863	sp|Q9WUK7|OPN3_MOUSE	-0.51449	-0.653705	Not Interesting
23211	g15881	sp|Q06725|N2F1A_DANRE	-0.433865	-0.172562	Not Interesting
23215	g15881	sp|Q06725|N2F1A_DANRE	-1.051	-0.519996	Not Interesting
23220	g15882	sp|Q9Z1N9|UN13B_MOUSE	-1.05947	-0.317979	Not Interesting
23248	g15884	NA	0.372778	0.767723	Not Interesting
23249	g15884	NA	-0.199228	-0.327279	Not Interesting
23252	g15884	NA	-1.17539	-1.67881	Not Interesting
23267	g15894	sp|B5ZYI7|DUT_RHILW	0.941712	0.235083	Not Interesting
2328	g391	NA	-0.523111	-1.08266	Not Interesting
23295	g15901	NA	0.355532	0.596316	Not Interesting
23299	g15903	sp|P21329|RTJK_DROFU	0.534507	-0.0147927	Not Interesting
23311	g15906	sp|P13804|ETFA_HUMAN	-0.622217	-0.216565	Not Interesting
23312	g15906	sp|P13804|ETFA_HUMAN	-0.861369	-0.223505	Not Interesting
23330	g15911	sp|Q3SZ27|MIC27_BOVIN	-0.258623	-0.353553	Not Interesting
23334	g15913	sp|Q63ZI0|KCNK9_XENLA	0.223602	0.758208	Not Interesting
23358	g7335	sp|Q3SYS6|CHP1_BOVIN	-0.406286	-1.62078	Not Interesting
23411	NA	NA	0.18868	1.57079	Head
23448	g30805	NA	0.145011	0.501975	Not Interesting
23478	g31477	sp|P17972|KCNAW_DROME	-0.510908	-0.549136	Not Interesting
23544	g6065	sp|C3YWU0|FUCO_BRAFL	0.280031	0.487854	Not Interesting
2355	g15000	sp|Q6IYF9|SUCR1_RAT	0.538631	0.317611	Not Interesting
23562	g6067	NA	0.606331	0.785626	Not Interesting
23611	g1591	sp|Q01973|ROR1_HUMAN	-0.644346	0.408392	Head
23614	g1591	sp|Q01973|ROR1_HUMAN	0.195691	1.09847	Head
23615	g1591	sp|Q01973|ROR1_HUMAN	0.296903	0.520872	Not Interesting
23616	g1591	sp|Q01973|ROR1_HUMAN	-0.374744	0.208725	Head
23617	g1591	sp|Q01973|ROR1_HUMAN	-0.60106	0.00461651	Not Interesting
23723	g1609	sp|P21328|RTJK_DROME	-0.375095	-0.886292	Not Interesting
23728	g1610	sp|Q9ERQ8|CAH7_MOUSE	-0.433668	0.695317	Head
23755	g1616	sp|O57422|OPN4B_XENLA	0.201768	0.553025	Not Interesting
23756	g1616	sp|O57422|OPN4B_XENLA	0.29656	0.615455	Not Interesting
23762	g1619	NA	-0.43721	-0.639603	Not Interesting
23873	g23177	sp|P70255|NFIC_MOUSE	0.99393	0.920362	Not Interesting
23876	g23177	sp|P70255|NFIC_MOUSE	0.309886	0.969984	Not Interesting
23877	g23177	sp|P70255|NFIC_MOUSE	-0.288235	-0.626107	Not Interesting
23943	g27513	NA	-0.577629	-0.517847	Not Interesting
23945	g27513	NA	-1.06171	0.371364	Head
23946	g27513	NA	-0.779919	0.533988	Head
23948	g27513	NA	-0.827724	1.24886	Head
23966	NA	NA	-1.32893	-0.386257	Not Interesting
23983	g32977	NA	-0.817836	-0.931687	Not Interesting
23996	g32981	sp|Q5ZJ56|RL7_CHICK	0.43871	0.18205	Not Interesting
24000	g32982	sp|Q5R6T1|PDIA6_PONAB	0.860338	0.689097	Not Interesting
24019	g32989	sp|P48147|PPCE_HUMAN	1.45528	1.33777	Not Interesting
2402	g15023	sp|O75146|HIP1R_HUMAN	0.343338	0.385041	Not Interesting
24027	g32989	sp|P48147|PPCE_HUMAN	0.956949	0.83669	Not Interesting
24034	g32990	NA	0.175762	0.447337	Not Interesting
24043	g32991	sp|Q9Y6I9|TX264_HUMAN	0.113734	0.783356	Not Interesting
24045	g32992	NA	-0.340911	-0.690515	Not Interesting
24064	g32997	sp|P51554|EF1A_HYDVU	0.549531	0.223295	Not Interesting
24068	g33001	sp|A1A4J1|PFKAL_BOVIN	-0.286525	-0.511657	Not Interesting
24108	g33019	NA	-0.309449	-0.660693	Not Interesting
24109	g33020	NA	-0.662099	-0.337683	Not Interesting
2414	g15025	sp|O75146|HIP1R_HUMAN	-0.374944	-0.573841	Not Interesting
24156	g25396	NA	0.0824886	0.642301	Not Interesting
24182	g12066	NA	-0.190749	-0.661836	Not Interesting
24184	g26195	NA	1.31834	1.76071	Not Interesting
24194	g11780	sp|Q62445|SP4_MOUSE	-0.509339	-0.0836184	Not Interesting
24196	g11780	sp|Q62445|SP4_MOUSE	-0.0313591	-0.421385	Not Interesting
24198	g11780	sp|Q62445|SP4_MOUSE	-0.727192	-0.534398	Not Interesting
24213	g11787	sp|Q9NSI2|F207A_HUMAN	0.939689	0.62105	Not Interesting
24254	g11800	NA	-0.413601	-0.274498	Not Interesting
24367	g11860	NA	-0.409164	-0.489589	Not Interesting
24368	g11860	NA	-0.480301	-0.699366	Not Interesting
24391	g11868	NA	-0.537021	-0.547946	Not Interesting
24393	g11868	NA	-0.545272	0.111618	Not Interesting
24490	g1275	sp|P27918|PROP_HUMAN	-0.811129	0.225415	Head
24506	g1275	sp|P27918|PROP_HUMAN	1.14347	-0.284008	Foot
24507	g1275	sp|P27918|PROP_HUMAN	0.310306	-0.930052	Foot
24511	g1276	sp|Q96RW7|HMCN1_HUMAN	1.40287	-0.418639	Foot
24512	g1276	sp|Q96RW7|HMCN1_HUMAN	1.50217	-0.283588	Foot
24514	g1276	sp|Q96RW7|HMCN1_HUMAN	1.67539	-0.377181	Foot
24515	g1276	sp|Q96RW7|HMCN1_HUMAN	1.60936	0.0472189	Not Interesting
24516	g1276	sp|Q96RW7|HMCN1_HUMAN	1.38227	-0.172714	Not Interesting
24517	g1276	sp|Q96RW7|HMCN1_HUMAN	1.90386	-0.0859504	Foot
24518	g1276	sp|Q96RW7|HMCN1_HUMAN	1.40367	-0.173353	Not Interesting
24520	g1276	sp|Q96RW7|HMCN1_HUMAN	0.623077	-0.366898	Foot
24552	g14127	NA	-0.631958	-0.911303	Not Interesting
24596	g6382	sp|Q19269|NAS14_CAEEL	-0.387128	-0.0715519	Not Interesting
24612	g6386	NA	-0.679987	-0.612438	Not Interesting
24624	g6387	sp|P08183|MDR1_HUMAN	-0.494721	-0.746574	Not Interesting
24647	g31517	sp|Q96RW7|HMCN1_HUMAN	1.12578	0.75704	Not Interesting
2465	g15047	NA	-0.0655287	-0.609942	Not Interesting
24700	g31543	sp|A3KCL7|OXDD_PIG	0.516356	0.682159	Not Interesting
24721	g31546	NA	-0.081919	-0.519015	Not Interesting
24749	g8539	NA	-0.50523	-0.611264	Not Interesting
24793	g19642	sp|Q5SVZ6|ZMYM1_HUMAN	0.557123	0.555972	Not Interesting
24800	g33594	sp|Q7Z494|NPHP3_HUMAN	-0.154244	-0.65534	Not Interesting
2487	g15052	NA	-0.596804	-0.138958	Not Interesting
24981	g26297	sp|Q6VMQ6|MCAF1_HUMAN	0.284649	0.811401	Not Interesting
24988	g26299	sp|Q9NR09|BIRC6_HUMAN	-1.04222	-1.70448	Not Interesting
2499	g15060	NA	-0.584183	-0.444789	Not Interesting
24997	g26307	NA	-0.566955	-0.522353	Not Interesting
25011	g20580	sp|Q9U943|APLP_LOCMI	0.946507	0.262468	Not Interesting
25012	g20580	sp|Q9U943|APLP_LOCMI	1.4572	0.638977	Not Interesting
25013	g20580	sp|Q9U943|APLP_LOCMI	1.2796	0.508608	Not Interesting
25014	g20581	sp|Q9U943|APLP_LOCMI	1.5416	0.70181	Not Interesting
25015	g20581	sp|Q9U943|APLP_LOCMI	1.35173	0.673589	Not Interesting
25043	g20596	NA	-0.640131	-0.406189	Not Interesting
25064	g27042	NA	-0.85011	-0.894649	Not Interesting
25068	g27043	NA	-0.203413	-0.762017	Not Interesting
25093	g9416	NA	-1.03444	-0.518272	Not Interesting
25116	g6091	sp|P21328|RTJK_DROME	0.602273	0.530596	Not Interesting
2513	g7609	sp|Q95029|CATL_DROME	-0.715405	-1.09312	Not Interesting
25145	g6109	sp|Q3TCT4|ENTP7_MOUSE	2.05876	2.49107	Not Interesting
25152	g6116	sp|Q8WX94|NALP7_HUMAN	-0.654541	-0.601244	Not Interesting
2517	g7619	NA	-0.413789	-1.09131	Not Interesting
2518	g7620	NA	-0.362217	-0.949261	Not Interesting
25197	g6131	sp|O73853|CP17A_ICTPU	0.438246	0.541711	Not Interesting
25199	g6131	sp|O73853|CP17A_ICTPU	0.0372144	0.981526	Head
25200	g6131	sp|O73853|CP17A_ICTPU	0.468528	1.26407	Not Interesting
25201	g6131	sp|O73853|CP17A_ICTPU	0.439186	3.39249	Head
25218	g6134	sp|Q7LHG5|YI31B_YEAST	-1.0415	-0.42657	Not Interesting
25219	g6134	sp|Q7LHG5|YI31B_YEAST	-0.944718	0.612668	Head
25238	g6138	NA	0.610612	0.823974	Not Interesting
25252	g6141	sp|Q4UMH6|Y381_RICFE	-0.354628	-1.01587	Not Interesting
25255	g6142	sp|Q04202|TCB2_CAEBR	-0.564945	-0.986646	Not Interesting
25256	g6142	sp|Q04202|TCB2_CAEBR	-0.457779	-0.706702	Not Interesting
25279	g6147	sp|P21328|RTJK_DROME	0.481777	0.244639	Not Interesting
25306	g6163	NA	-0.728139	-0.89273	Not Interesting
25309	g6164	sp|Q9UHC6|CNTP2_HUMAN	-1.29024	-0.151936	Head
25310	g6164	sp|Q9UHC6|CNTP2_HUMAN	-1.75504	-0.493355	Head
25317	g6167	sp|Q8BH04|PCKGM_MOUSE	-0.605433	-0.577644	Not Interesting
25322	g6167	sp|Q8BH04|PCKGM_MOUSE	-0.0232393	-1.05859	Not Interesting
25328	g6168	sp|P49263|PXN1_XENLA	-0.957972	0.188977	Head
25353	g6172	sp|P0DOC8|CH037_DANRE	-0.160816	0.501169	Not Interesting
25365	g6176	NA	0.589886	0.981624	Not Interesting
2537	g7626	sp|Q40302|CALM_MACPY	-0.227566	-0.505972	Not Interesting
2538	g7626	sp|Q40302|CALM_MACPY	-0.471821	-0.94822	Not Interesting
25384	g6178	sp|Q9UJ78|ZMYM5_HUMAN	-0.0934948	-0.627071	Not Interesting
25409	g6189	NA	0.304266	0.397722	Not Interesting
2543	g7629	sp|Q6NYB7|RAB1A_RAT	0.378022	0.206234	Not Interesting
25520	g25531	NA	0.636061	0.535189	Not Interesting
25542	g6706	NA	-0.257902	-0.629989	Not Interesting
25552	g6707	sp|Q9UGT4|SUSD2_HUMAN	0.377274	0.825171	Not Interesting
2556	g7633	sp|Q5SX19|PIGL_MOUSE	-0.187432	-0.342838	Not Interesting
2559	g7634	sp|Q08AW4|PKHM3_XENLA	0.81341	1.44831	Not Interesting
256	g18935	sp|P30940|5HT1F_RAT	1.32363	1.7163	Not Interesting
25610	g10633	sp|P35072|TCB1_CAEBR	0.0800347	-1.21394	Not Interesting
25648	g10650	sp|Q7LL04|YQK1_SCHPO	0.361909	1.09807	Not Interesting
25673	g10655	NA	-0.47063	-0.569233	Not Interesting
25708	g10675	NA	-0.614576	0.53971	Head
25725	g10680	sp|H2A0N9|KCP4_PINMG	0.478895	1.32456	Not Interesting
25726	g10680	sp|H2A0N9|KCP4_PINMG	0.189476	0.851793	Not Interesting
25727	g10680	sp|H2A0N9|KCP4_PINMG	0.433513	1.10559	Not Interesting
25728	g10680	sp|H2A0N9|KCP4_PINMG	0.514874	1.54252	Not Interesting
25748	g4990	NA	-1.09589	-0.794321	Not Interesting
25857	g33566	sp|P41743|KPCI_HUMAN	0.682806	0.648306	Not Interesting
25881	g33575	NA	0.186701	0.515987	Not Interesting
25884	g33575	NA	0.0219334	0.559244	Not Interesting
25899	g33581	NA	1.65878	1.69635	Not Interesting
25900	g33581	NA	0.79093	0.775928	Not Interesting
2591	g7646	NA	-0.476997	-0.766043	Not Interesting
25962	g7798	NA	-0.259752	-0.380076	Not Interesting
25985	g7808	NA	-0.608182	-1.39903	Not Interesting
25988	g7810	sp|Q9I830|KCNA2_ONCMY	-0.840376	-0.465943	Not Interesting
25994	g7810	sp|Q9I830|KCNA2_ONCMY	-0.437298	-0.472272	Not Interesting
26011	g7815	sp|Q04202|TCB2_CAEBR	-0.0104912	-0.594913	Not Interesting
26050	g7825	sp|A1A5V9|ELP5_DANRE	-1.07003	-0.552864	Not Interesting
26055	g7827	sp|Q95SX7|RTBS_DROME	-0.722058	-0.527494	Not Interesting
26058	g7829	sp|Q6AX60|PTHB1_XENLA	-0.463988	-0.262117	Not Interesting
26059	g7829	sp|Q6AX60|PTHB1_XENLA	-0.381298	-0.98219	Not Interesting
26066	g7832	sp|O95267|GRP1_HUMAN	0.290834	0.530237	Not Interesting
26068	g7832	sp|O95267|GRP1_HUMAN	-0.0846131	0.464192	Not Interesting
26084	g7838	NA	-0.541103	0.199282	Head
26085	g7838	NA	-0.494664	-0.00854421	Not Interesting
26108	g7843	NA	-0.258395	-0.609626	Not Interesting
26161	g22869	NA	-1.20452	0.167884	Head
26183	g22875	NA	0.173767	0.565096	Not Interesting
2622	g7652	sp|Q52KG5|KI26A_MOUSE	-1.31081	-0.633588	Not Interesting
2623	g7652	sp|Q52KG5|KI26A_MOUSE	-1.04922	-1.36446	Not Interesting
2624	g7652	sp|Q52KG5|KI26A_MOUSE	-0.680678	-0.518749	Not Interesting
2625	g7652	sp|Q52KG5|KI26A_MOUSE	-0.334825	1.34015	Head
2626	g7652	sp|Q52KG5|KI26A_MOUSE	-0.81842	-0.217553	Not Interesting
2627	g7652	sp|Q52KG5|KI26A_MOUSE	0.0654965	-0.968663	Not Interesting
26279	g9269	sp|Q14192|FHL2_HUMAN	-0.018095	0.485801	Not Interesting
26323	g11659	sp|Q9NQG7|HPS4_HUMAN	0.237181	0.542279	Not Interesting
26328	g11659	sp|Q9NQG7|HPS4_HUMAN	1.18141	0.683696	Not Interesting
26330	g11659	sp|Q9NQG7|HPS4_HUMAN	-0.345977	-0.689568	Not Interesting
26368	g11670	sp|Q4FAT7|BGLR_PIG	-0.901062	-1.26011	Not Interesting
26385	g11692	sp|Q9JJC6|RIPL1_MOUSE	-1.06385	-0.31323	Not Interesting
26388	g11694	sp|P39921|TPM1_HYDVU	-0.1296	0.771119	Not Interesting
26392	g11696	sp|P39921|TPM1_HYDVU	-0.5868	-0.409766	Not Interesting
26393	g11696	sp|P39921|TPM1_HYDVU	-0.589753	-0.661457	Not Interesting
26394	g11696	sp|P39921|TPM1_HYDVU	-1.11669	-0.252911	Head
26427	g11711	NA	0.0582144	0.769343	Not Interesting
26457	g25247	sp|P18915|CAH6_BOVIN	-0.727747	-0.294221	Not Interesting
26464	g25248	sp|Q8UWA5|CAH2_TRIHK	-0.761876	-0.735839	Not Interesting
26499	g25257	NA	-0.468684	-0.590055	Not Interesting
26523	g17028	NA	-0.369787	-0.430138	Not Interesting
26542	g16603	NA	-0.422833	-0.567091	Not Interesting
26589	g16622	sp|Q9Y6A4|CFA20_HUMAN	0.437526	0.356192	Not Interesting
26620	g16632	NA	0.0455328	-0.558586	Not Interesting
26661	NA	NA	-0.810272	-1.32273	Not Interesting
26678	g21311	sp|Q9U539|OCT1_CAEEL	-0.746019	0.835996	Head
26796	g26083	sp|P51399|LOX5_MESAU	-0.526312	0.736012	Head
26802	g26084	sp|Q9Z2X3|PSD10_RAT	-0.492358	0.421965	Head
2688	g6723	NA	-0.595478	-0.304746	Not Interesting
26900	g16288	sp|Q28H35|DAND5_XENTR	-1.33281	-0.574395	Not Interesting
26901	g16288	sp|Q28H35|DAND5_XENTR	-1.51176	-1.49563	Not Interesting
26903	g16289	NA	-0.446695	-0.158405	Not Interesting
26911	g16296	NA	-1.27157	-1.25911	Not Interesting
26922	g16299	sp|Q9QWG7|ST1B1_MOUSE	0.233181	0.454507	Not Interesting
26958	g28509	sp|Q02974|KHK_RAT	0.416838	0.249157	Not Interesting
26966	g28511	NA	-1.04983	-1.05342	Not Interesting
26968	g28512	NA	-0.1634	-0.42842	Not Interesting
26971	g28512	NA	-0.696328	-0.664058	Not Interesting
27009	g12685	sp|Q3U481|MFS12_MOUSE	-0.0700391	1.05346	Not Interesting
27011	g12685	sp|Q3U481|MFS12_MOUSE	-1.35853	-0.432274	Head
27128	g9430	NA	0.0878616	0.558171	Not Interesting
2715	g6732	sp|Q54KA7|SECG_DICDI	-0.980572	-0.396185	Not Interesting
2717	g6732	sp|Q54KA7|SECG_DICDI	-0.609015	-0.059549	Not Interesting
27236	g9247	sp|Q16982|NECX_APLCA	0.456616	0.833302	Not Interesting
27288	g2880	NA	1.7511	2.08495	Not Interesting
27289	g2880	NA	-0.771057	-0.916814	Not Interesting
27343	g21337	NA	-0.278025	-0.689579	Not Interesting
27361	g1957	sp|Q8C1R0|TSSK5_MOUSE	-0.736058	0.18089	Head
27392	g1967	sp|Q2TA16|CCD65_BOVIN	-0.868016	-0.945995	Not Interesting
27525	g2061	sp|Q8VHN7|GPR98_MOUSE	-0.5015	-0.652014	Not Interesting
27529	g2062	NA	-1.26342	0.0909883	Head
27551	g2069	NA	-0.035869	0.977711	Not Interesting
27552	g2069	NA	0.229104	0.932992	Not Interesting
27672	g28482	sp|Q8BW72|KDM4A_MOUSE	0.343403	0.661694	Not Interesting
2768	g6754	NA	-0.457457	-0.350216	Not Interesting
27688	g28490	sp|B5DG67|WDR12_SALSA	-0.136084	1.10476	Not Interesting
27694	g28492	sp|D3Z8N4|KLH20_RAT	-0.330814	-0.408138	Not Interesting
27698	g28492	sp|D3Z8N4|KLH20_RAT	0.193301	0.559799	Not Interesting
27729	g28505	sp|O60290|ZN862_HUMAN	0.292738	1.3412	Not Interesting
27783	g7936	sp|Q91175|ADA1A_ORYLA	-0.571222	-0.258098	Not Interesting
27793	g7938	sp|Q7RTX9|MOT14_HUMAN	-0.865109	-0.758812	Not Interesting
27848	g23129	NA	-0.838091	0.690152	Head
27853	g23129	NA	-0.276228	-0.344053	Not Interesting
27873	g23134	sp|Q52KK3|S2551_RAT	-0.249228	-0.401576	Not Interesting
27956	g11467	NA	-0.410532	-0.553611	Not Interesting
27966	g11470	sp|Q96LW9|ZSC31_HUMAN	1.05395	2.5053	Head
27967	g11470	sp|Q96LW9|ZSC31_HUMAN	0.3199	1.24077	Not Interesting
27969	g11470	sp|Q96LW9|ZSC31_HUMAN	-0.106738	0.60106	Not Interesting
27970	g11470	sp|Q96LW9|ZSC31_HUMAN	0.0340144	0.619087	Not Interesting
27971	g11470	sp|Q96LW9|ZSC31_HUMAN	0.334421	1.3118	Not Interesting
27972	g11470	sp|Q96LW9|ZSC31_HUMAN	0.493392	1.12882	Not Interesting
27981	g11471	sp|P24044|CALM_PLAFA	-0.35268	0.403588	Head
2803	g6758	sp|Q91EK3|REP_GOCV	0.271149	0.612771	Not Interesting
28079	g30639	sp|Q20191|NAS13_CAEEL	0.822282	0.498309	Not Interesting
28105	g30647	sp|P55115|NAS15_CAEEL	0.514659	0.289552	Not Interesting
28247	g32440	sp|Q4R7L3|PRS6B_MACFA	0.44628	0.127343	Not Interesting
28257	g32443	NA	0.351579	0.744648	Not Interesting
28258	g32443	NA	-0.384902	-0.787599	Not Interesting
28320	g10852	sp|Q9NRR4|RNC_HUMAN	-0.55624	-0.565047	Not Interesting
28330	g10853	sp|Q5HZJ0|RNC_MOUSE	0.805893	0.822458	Not Interesting
28333	g10854	sp|Q4QQY7|TGT_XENLA	0.267467	0.665895	Not Interesting
28346	g21617	NA	1.27881	0.893713	Not Interesting
28366	g21617	NA	0.484365	0.451505	Not Interesting
28426	g4694	NA	0.708465	0.151525	Not Interesting
28478	g9091	sp|Q7U6F4|RIMK_SYNPX	-0.478898	-0.252048	Not Interesting
28489	g29665	NA	0.661098	1.09333	Not Interesting
28505	g29668	NA	-0.510064	-0.794637	Not Interesting
28517	g29670	sp|Q95M18|ENPL_BOVIN	0.755447	0.612007	Not Interesting
2852	g6825	sp|Q9H0J4|QRIC2_HUMAN	0.42901	0.697482	Not Interesting
28617	g28117	sp|A6NMZ7|CO6A6_HUMAN	1.30155	0.844064	Not Interesting
28623	g28118	NA	-0.622342	-0.308319	Not Interesting
28624	g28118	NA	0.10672	0.832052	Not Interesting
28628	g28118	NA	0.933389	0.211353	Not Interesting
2867	g6835	sp|A0JMP0|ATHL1_DANRE	-0.539941	-0.891121	Not Interesting
28671	g11022	sp|Q9H6U8|ALG9_HUMAN	0.245418	0.936501	Not Interesting
28699	g11029	NA	-0.31388	-0.642155	Not Interesting
28701	g11030	NA	-0.573863	-0.668853	Not Interesting
28708	g11032	NA	-0.764657	-0.736463	Not Interesting
28711	g11032	NA	-0.71442	-0.0402042	Not Interesting
28778	NA	NA	1.63359	1.9536	Not Interesting
28801	g29167	sp|A0JMY5|NFXL1_XENLA	-1.37193	0.0911992	Not Interesting
2881	g6839	sp|Q05944|HSP70_HYDVU	1.08296	0.67861	Not Interesting
28827	g29176	sp|Q9VZS6|NSMA_DROME	0.114926	0.451833	Not Interesting
28844	g29180	sp|P12258|HOBOT_DROME	-0.35963	-0.207502	Not Interesting
28876	g29199	NA	0.75231	0.792556	Not Interesting
28905	g23249	NA	-0.10423	0.709166	Head
28911	g23252	sp|P23508|CRCM_HUMAN	0.142666	1.30244	Head
28925	g23256	sp|Q8BH31|MFSD8_MOUSE	-0.667559	0.113221	Head
28926	g23256	sp|Q8BH31|MFSD8_MOUSE	0.308544	1.40384	Head
28929	g23256	sp|Q8BH31|MFSD8_MOUSE	-0.659061	-0.776206	Not Interesting
28954	g23268	sp|O94827|PKHG5_HUMAN	-0.693936	-0.544649	Not Interesting
28968	g23270	sp|Q7ZTV5|FSHR_CAIMO	-0.464433	-0.345955	Not Interesting
28980	g23271	sp|Q28EW0|TM87A_XENTR	0.35496	0.246843	Not Interesting
29011	g23284	sp|P54288|CACB2_RABIT	-0.182565	-0.579664	Not Interesting
29018	g23284	sp|P54288|CACB2_RABIT	-0.108251	-0.655146	Not Interesting
29019	g23285	NA	-0.41305	-0.674772	Not Interesting
29023	g23286	NA	-0.810052	-1.40997	Not Interesting
29024	g23287	NA	1.0735	1.16184	Not Interesting
29025	g23288	NA	-0.876845	-0.650446	Not Interesting
29026	g23288	NA	-0.509372	-0.267843	Not Interesting
29072	g23296	sp|Q64317|DLX1_MOUSE	-0.78513	-0.22002	Not Interesting
2908	g6847	sp|P20673|ARLY_RAT	-0.882689	-1.13145	Not Interesting
29087	NA	NA	1.62089	2.1186	Not Interesting
29124	g28537	NA	-0.693115	-0.767934	Not Interesting
29125	g28537	NA	-0.696172	-0.70692	Not Interesting
29193	g28594	sp|Q9Z2I4|ROBO3_MOUSE	0.280103	0.538511	Not Interesting
29223	g28606	sp|Q06507|ATF4_MOUSE	-0.544126	-0.623434	Not Interesting
29248	g28610	sp|Q9H1Y3|OPN3_HUMAN	-0.572749	-0.441743	Not Interesting
29249	g28610	sp|Q9H1Y3|OPN3_HUMAN	-0.712284	-0.0536828	Not Interesting
29267	g28615	sp|Q0V8S0|HGS_BOVIN	1.10606	0.901332	Not Interesting
29276	g28616	sp|Q80VP0|TCPR1_MOUSE	0.521366	0.768881	Not Interesting
29334	g28639	NA	-0.492095	-0.72476	Not Interesting
2938	g32638	sp|Q98925|IRF2_CHICK	-0.4303	-0.337347	Not Interesting
29387	g28647	sp|Q5T2S8|ARMC4_HUMAN	-0.248331	-0.879263	Not Interesting
29402	g28653	NA	-0.545527	-0.156881	Not Interesting
29473	g28682	sp|Q95NR9|CALM_METSE	-0.611427	-0.0349313	Not Interesting
2949	g32648	sp|Q8CE96|TRM6_MOUSE	-0.970592	-0.00654966	Not Interesting
29521	g28700	sp|Q9NXK6|MPRG_HUMAN	-0.197808	-0.929852	Not Interesting
29556	g21447	sp|P55344|LMIP_HUMAN	-0.379617	-0.63331	Not Interesting
29582	g1736	NA	0.537944	0.823015	Not Interesting
29583	g1736	NA	0.982263	0.599715	Not Interesting
29596	g19241	sp|Q80WQ9|ZBED4_MOUSE	-0.415323	-0.156081	Not Interesting
29637	g15629	sp|P18519|TNR16_CHICK	-0.302009	-0.520443	Not Interesting
2964	g32652	NA	-0.233846	-0.527224	Not Interesting
29648	g15630	sp|H2A0N9|KCP4_PINMG	-0.431706	-0.61091	Not Interesting
29653	g15630	sp|H2A0N9|KCP4_PINMG	-0.646536	-0.273775	Not Interesting
29658	g15631	sp|P0CJ14|VP302_LYCMC	0.799955	0.537625	Not Interesting
29661	g15631	sp|P0CJ14|VP302_LYCMC	-0.172627	-0.486226	Not Interesting
29685	g15636	sp|P42577|FRIS_LYMST	-0.0549283	0.726536	Not Interesting
29692	g15638	NA	-0.440601	-0.203604	Not Interesting
29722	g3467	NA	-0.398822	-0.362458	Not Interesting
29725	g3468	NA	-0.160496	-0.88597	Not Interesting
29735	g3473	sp|O15127|SCAM2_HUMAN	0.545278	0.850304	Not Interesting
29806	g3515	sp|A7S3I2|BBIP1_NEMVE	0.97877	0.24861	Not Interesting
29808	g3515	sp|A7S3I2|BBIP1_NEMVE	-0.451019	-0.744211	Not Interesting
29816	g3517	NA	0.0153909	-0.444229	Not Interesting
29842	g3525	NA	-1.17726	-1.1767	Not Interesting
29852	g3528	sp|Q25189|GBLP_HYDVU	0.531067	0.242595	Not Interesting
29853	g3528	sp|Q25189|GBLP_HYDVU	0.380573	0.288272	Not Interesting
29869	g3530	sp|P30825|CTR1_HUMAN	0.434603	0.535337	Not Interesting
29881	g3534	sp|Q5XIH9|HPDL_RAT	-0.802028	-1.12904	Not Interesting
29931	g3549	NA	1.58987	2.16337	Not Interesting
29954	g3553	sp|A0LMC1|PHNX_SYNFM	-0.733761	0.447264	Head
29982	g3561	NA	-0.406303	-0.633902	Not Interesting
29985	g3562	NA	0.0799098	0.835625	Head
29986	g3562	NA	0.359488	0.90659	Not Interesting
29997	g3564	sp|Q6V0I7|FAT4_HUMAN	-0.301088	-0.638712	Not Interesting
30018	g3566	NA	0.787367	1.38496	Not Interesting
30024	g3568	sp|O35490|BHMT1_MOUSE	0.932241	0.0568539	Not Interesting
30040	g28088	NA	-0.270703	-0.455803	Not Interesting
3008	g798	NA	-0.214632	-0.859686	Not Interesting
30144	g19367	NA	-0.540547	0.0637768	Not Interesting
30162	g19368	sp|Q12882|DPYD_HUMAN	-0.575322	0.127346	Head
30165	g19369	sp|Q28007|DPYD_BOVIN	-0.806337	0.35693	Head
3023	g800	NA	-0.269701	-0.565844	Not Interesting
30238	g33270	sp|Q13367|AP3B2_HUMAN	-0.838842	-0.809362	Not Interesting
30239	g33271	NA	-0.207733	-0.642194	Not Interesting
30246	g33271	NA	-0.823106	-0.311625	Not Interesting
30315	g33299	NA	0.0697729	-0.995653	Not Interesting
30348	g16588	NA	0.425169	0.759144	Not Interesting
30350	g16590	NA	-0.806256	-0.788428	Not Interesting
30355	g16598	NA	-0.674456	-0.844377	Not Interesting
30383	g26848	NA	0.15461	1.54357	Head
30388	g26850	NA	0.36355	1.00955	Not Interesting
30427	NA	NA	0.142887	-1.03825	Not Interesting
30451	g32665	sp|Q9VFK6|KMT5A_DROME	0.142188	0.456587	Not Interesting
30462	g32666	NA	0.352853	0.267538	Not Interesting
30493	g5294	NA	1.03268	0.81679	Not Interesting
30539	g2033	NA	-0.0665836	-0.652934	Not Interesting
30551	g2036	sp|P61359|RL27_HIPCM	0.462089	0.258092	Not Interesting
30580	g2041	sp|Q93127|GPR18_AMPAM	-0.83841	-0.931555	Not Interesting
30581	g2041	sp|Q93127|GPR18_AMPAM	-0.555165	-0.583189	Not Interesting
30596	g2044	NA	1.73425	1.32683	Not Interesting
306	g18951	sp|P38571|LICH_HUMAN	0.735588	0.771994	Not Interesting
30661	g25322	sp|O60290|ZN862_HUMAN	2.11966	2.12959	Not Interesting
30713	g26572	sp|Q2QUN2|LAC24_ORYSJ	-0.460735	-1.09065	Not Interesting
30716	g26572	sp|Q2QUN2|LAC24_ORYSJ	0.0956315	0.676288	Not Interesting
30725	g26574	NA	-0.109978	0.652182	Not Interesting
30743	g26583	sp|Q68CZ2|TENS3_HUMAN	-0.626483	-0.606606	Not Interesting
30747	g26583	sp|Q68CZ2|TENS3_HUMAN	-0.483818	-0.274679	Not Interesting
30870	g8646	NA	-0.768648	-0.0339299	Not Interesting
30881	g8647	sp|Q14767|LTBP2_HUMAN	-0.32954	-0.809818	Not Interesting
30902	g8658	sp|A2ASQ1|AGRIN_MOUSE	-1.03299	-1.3503	Not Interesting
30971	g17902	sp|Q90YT3|RL35A_ICTPU	0.973088	0.534794	Not Interesting
30978	g2729	NA	-0.160966	-0.521202	Not Interesting
31004	g3893	sp|Q8GXG1|ASPGB_ARATH	0.703582	0.703569	Not Interesting
31006	g3893	sp|Q8GXG1|ASPGB_ARATH	0.768804	1.23856	Not Interesting
31046	g3921	sp|Q8BTM8|FLNA_MOUSE	-0.639773	0.546803	Head
31048	g3921	sp|Q8BTM8|FLNA_MOUSE	-0.272441	-0.408485	Not Interesting
31060	g3921	sp|Q8BTM8|FLNA_MOUSE	-0.101162	-0.475225	Not Interesting
31153	g3949	NA	-0.612831	-0.284989	Not Interesting
31216	g13188	NA	-1.03733	-1.03206	Not Interesting
31225	g13190	sp|Q8MIZ3|DCPS_PIG	-1.56576	-0.280616	Head
31229	g13191	NA	-0.337587	-0.0164792	Not Interesting
31260	g13195	NA	-0.326354	-0.41709	Not Interesting
31339	g28874	NA	0.531813	0.347904	Not Interesting
314	g18952	sp|O15072|ATS3_HUMAN	0.0975385	1.28857	Head
31415	g13265	NA	-0.695543	-0.407265	Not Interesting
31470	g17706	NA	-0.514545	-0.64158	Not Interesting
31514	g17730	sp|Q8N2M4|TM86A_HUMAN	-0.632173	-0.936054	Not Interesting
31533	g17742	sp|Q5IS41|NCAN_PANTR	-0.525864	-0.543701	Not Interesting
31538	g17742	sp|Q5IS41|NCAN_PANTR	0.487825	1.08164	Not Interesting
3155	g27050	NA	-0.0180711	0.820953	Not Interesting
31570	g17754	sp|Q7Z2H8|S36A1_HUMAN	-0.631985	-0.604042	Not Interesting
31600	g17760	NA	0.815299	1.04705	Not Interesting
31604	g23079	NA	0.477844	0.745184	Not Interesting
31607	g23079	NA	0.713248	1.6105	Not Interesting
31621	g23080	sp|Q5U3Q6|CIP4_DANRE	0.0202703	-0.812676	Not Interesting
3167	g27055	NA	-0.64774	-0.276892	Not Interesting
31693	g23119	sp|Q6P7A9|LYAG_RAT	-0.998932	-0.933059	Not Interesting
31704	g25303	NA	-0.15392	-0.774705	Not Interesting
31705	g25303	NA	-0.605634	-0.72395	Not Interesting
31807	g28054	NA	-1.09386	-1.56601	Not Interesting
31891	g3833	sp|Q99595|TI17A_HUMAN	-0.0632472	0.996431	Not Interesting
31945	g26586	NA	-0.794739	-0.433674	Not Interesting
31950	g26586	NA	-0.381922	-0.53787	Not Interesting
31982	g1318	NA	-0.518334	0.647489	Head
31987	g1319	NA	-0.476654	1.46624	Head
320	g18954	sp|A8WIP6|CDK20_DANRE	-0.561031	-0.320982	Not Interesting
32069	NA	NA	-1.0974	-0.972875	Not Interesting
3207	g20037	NA	0.0923382	0.556351	Not Interesting
3209	g20037	NA	0.288999	0.725538	Not Interesting
3211	g20037	NA	-0.263609	0.712383	Head
3212	g20037	NA	-0.0894536	1.37464	Head
3213	g20037	NA	-0.148367	0.677029	Not Interesting
32175	g14614	sp|O35841|API5_MOUSE	-0.945477	-0.578542	Not Interesting
32224	NA	NA	-0.565454	-0.717146	Not Interesting
32246	g29544	sp|O14656|TOR1A_HUMAN	-0.377187	-0.595036	Not Interesting
32336	g29578	sp|P50538|MAD1_MOUSE	-0.280458	-0.543925	Not Interesting
32337	g29578	sp|P50538|MAD1_MOUSE	-0.813012	-1.31243	Not Interesting
32352	NA	NA	0.694914	0.561669	Not Interesting
32428	g29057	NA	1.59933	1.72309	Not Interesting
3243	g20042	sp|Q66IY8|I2BLA_XENLA	-0.563278	-0.758556	Not Interesting
32433	g29060	NA	-0.492304	-0.207638	Not Interesting
3249	g20043	NA	0.662698	1.22421	Not Interesting
32491	g7855	NA	0.40081	0.937661	Not Interesting
32569	g21748	sp|O94988|FA13A_HUMAN	0.94216	0.657093	Not Interesting
32637	g17403	NA	-0.437196	-0.747517	Not Interesting
32656	g17407	NA	-0.471773	-0.621343	Not Interesting
32710	g32887	NA	-0.586593	-0.852163	Not Interesting
32718	g32887	NA	-1.22937	-0.454382	Not Interesting
32735	g31263	NA	-0.26393	-0.437612	Not Interesting
32765	g30155	NA	0.417308	1.63715	Not Interesting
32768	g30155	NA	-0.551923	-0.192258	Not Interesting
32785	g17479	sp|Q3UHD1|BAI1_MOUSE	-0.306518	-0.655717	Not Interesting
32790	g17479	sp|Q3UHD1|BAI1_MOUSE	-0.249524	-0.860078	Not Interesting
32811	g17485	sp|Q9DE27|RUVB2_XENLA	1.20502	1.5548	Not Interesting
32831	g17491	sp|E2JA28|DDAC_ENTAG	-0.358411	-0.436894	Not Interesting
32855	g17500	sp|Q9BXF3|CECR2_HUMAN	-0.299451	-0.361535	Not Interesting
32868	g17501	NA	0.057893	-1.12307	Foot
32916	g17513	NA	-0.0271139	-0.801547	Not Interesting
32964	g2656	NA	-0.315011	0.548201	Head
32992	g2661	sp|Q60467|CO5A1_CRILO	-0.702281	-0.566565	Not Interesting
33023	g21056	sp|Q29RV1|PDIA4_BOVIN	0.908149	0.607062	Not Interesting
33052	g18074	sp|Q3UU96|MRCKA_MOUSE	0.68525	0.673143	Not Interesting
33112	g18096	NA	-0.322674	-0.62613	Not Interesting
33139	g18101	NA	0.373331	0.683717	Not Interesting
33265	g18162	NA	-0.0323789	0.499731	Not Interesting
33343	g18184	NA	-0.562296	-0.690897	Not Interesting
33393	g18200	sp|Q99578|RIT2_HUMAN	-0.0235794	1.12208	Head
33407	g33373	sp|P56706|WNT7B_HUMAN	0.674669	4.25279	Head
33408	g33373	sp|P56706|WNT7B_HUMAN	-0.31847	1.16441	Head
33409	g33373	sp|P56706|WNT7B_HUMAN	-0.378849	1.29323	Head
33442	g33377	sp|Q8LA13|RH11_ARATH	-1.83347	-1.65012	Not Interesting
33448	g33380	sp|B5XBI1|IF43A_SALSA	0.403822	0.725074	Not Interesting
33452	g33381	sp|Q0V9L1|MMS19_XENTR	-0.511077	-0.300914	Not Interesting
33473	g33393	NA	-0.560046	0.0599668	Not Interesting
33474	g33393	NA	-1.3326	0.286453	Head
33483	g33394	sp|Q91W89|MA2C1_MOUSE	-0.469337	-0.694864	Not Interesting
33495	g33396	sp|Q28EM7|OTX5_XENTR	-0.432473	-0.605388	Not Interesting
33496	g33396	sp|Q28EM7|OTX5_XENTR	-0.427028	-0.147699	Not Interesting
33498	g33396	sp|Q28EM7|OTX5_XENTR	-0.880844	-0.273457	Not Interesting
33527	g33401	NA	-0.29635	-0.600975	Not Interesting
33550	g33404	NA	-0.547843	-0.296081	Not Interesting
33560	g33409	NA	0.0258559	0.379112	Not Interesting
33584	g33422	sp|Q62445|SP4_MOUSE	-0.324106	0.831491	Head
33585	g33422	sp|Q62445|SP4_MOUSE	-0.0544126	0.316572	Not Interesting
33586	g33422	sp|Q62445|SP4_MOUSE	-0.768062	0.190362	Head
33587	g33422	sp|Q62445|SP4_MOUSE	-0.248223	1.47478	Head
33589	g33422	sp|Q62445|SP4_MOUSE	-0.56043	0.766968	Head
33614	g33432	NA	0.00881921	0.890203	Head
33632	g33438	NA	-0.328819	-0.191884	Not Interesting
33657	g33443	NA	-0.402697	-0.178272	Not Interesting
33674	g33445	sp|Q28824|MYLK_BOVIN	0.135725	1.12446	Head
33687	g33447	NA	0.358582	0.790043	Not Interesting
33756	g33464	NA	0.254325	0.918316	Not Interesting
33757	g33464	NA	-0.308753	0.919434	Not Interesting
33776	g33465	sp|P20664|PRI1_MOUSE	-0.360226	0.0888038	Not Interesting
33777	g33466	sp|Q95LN2|CFA70_MACFA	0.133066	0.69459	Not Interesting
33809	g17573	sp|Q9U0M8|YPF06_PLAF7	0.746322	0.768018	Not Interesting
33811	g17574	sp|C9D7C2|CAC1A_APIME	-0.17377	-0.593129	Not Interesting
33830	g17581	sp|P56698|CAC1B_DIPOM	-0.725881	-0.959915	Not Interesting
33875	g19961	sp|P08570|RLA1_DROME	0.468612	0.286917	Not Interesting
33925	g10190	sp|Q95107|WASL_BOVIN	0.727426	0.900172	Not Interesting
33940	g15125	NA	0.460836	0.377815	Not Interesting
33942	g15125	NA	-0.841715	-0.0917613	Not Interesting
33970	g26784	sp|C9D7R3|VMPA3_LOXIN	-0.0243799	0.752385	Not Interesting
34004	g26795	sp|Q03326|OXIR_STRAT	-0.278229	-0.788282	Not Interesting
34027	g26798	sp|P35320|OXIR_STRLI	0.888547	0.643624	Not Interesting
34036	g26801	NA	-0.239364	-0.46965	Not Interesting
34037	g26801	NA	-0.266188	-0.75663	Not Interesting
3406	g23541	sp|Q62798|DRGX_RAT	-0.514874	-0.655272	Not Interesting
34082	g26813	NA	-0.702575	-0.840621	Not Interesting
34089	g26815	sp|O95475|SIX6_HUMAN	-1.06693	-0.0684174	Head
34091	g26815	sp|O95475|SIX6_HUMAN	-1.02287	-0.523431	Not Interesting
34108	g26819	NA	0.95608	0.860329	Not Interesting
34109	g26819	NA	0.357121	0.588891	Not Interesting
34126	g26833	sp|P24014|SLIT_DROME	0.69576	-0.310697	Foot
34161	g26840	sp|Q566L4|ZN703_XENTR	-0.142941	-0.545422	Not Interesting
34162	g26840	sp|Q566L4|ZN703_XENTR	-1.49329	0.17945	Head
34163	g26840	sp|Q566L4|ZN703_XENTR	-0.563288	-0.0854195	Not Interesting
34277	g25771	sp|P38977|ANTA_HYDVU	0.386446	-0.788279	Foot
34287	g25773	sp|P38977|ANTA_HYDVU	0.0696722	-0.697414	Not Interesting
34325	g25781	NA	-0.860693	-1.39123	Not Interesting
3433	g23544	sp|Q9VHH9|JHD1_DROME	-1.23758	-1.26492	Not Interesting
34360	g25802	sp|Q7LHG5|YI31B_YEAST	1.12413	0.782377	Not Interesting
34382	g25814	NA	-0.358987	-0.343673	Not Interesting
34460	g9614	NA	1.20121	0.50399	Not Interesting
34467	g9617	sp|Q95SX7|RTBS_DROME	-0.00459318	1.72603	Head
34489	g20686	NA	-0.648689	-0.880013	Not Interesting
34490	g20686	NA	-0.640485	-0.787891	Not Interesting
34493	g20686	NA	-0.348074	-0.345543	Not Interesting
34524	g20690	sp|Q6TXF1|ARRD3_RAT	-0.355749	-0.510427	Not Interesting
34559	g20700	sp|Q7TPQ9|ARRD3_MOUSE	-0.275467	-0.638073	Not Interesting
34630	g6956	NA	0.89415	0.577609	Not Interesting
34709	g6980	NA	-0.48333	-0.274266	Not Interesting
34719	g456	sp|P42859|HD_MOUSE	-0.597189	-0.635511	Not Interesting
34720	g456	sp|P42859|HD_MOUSE	-0.422539	-0.555687	Not Interesting
34721	g456	sp|P42859|HD_MOUSE	-0.602219	-0.232072	Not Interesting
34722	g456	sp|P42859|HD_MOUSE	-0.275917	-0.72934	Not Interesting
34724	g458	sp|P42859|HD_MOUSE	-0.41296	-0.63392	Not Interesting
34725	g458	sp|P42859|HD_MOUSE	-0.515561	-0.13259	Not Interesting
34769	g472	sp|Q9TUP7|OX2R_CANLF	-0.735961	-0.668762	Not Interesting
34776	g472	sp|Q9TUP7|OX2R_CANLF	0.6527	0.528012	Not Interesting
34805	g19635	sp|Q54RZ7|Y1199_DICDI	-0.266252	-0.375894	Not Interesting
34890	g14375	sp|P21328|RTJK_DROME	-0.883556	-0.342127	Not Interesting
34922	g14380	sp|O77775|NCF2_BOVIN	0.826101	0.668235	Not Interesting
34928	g14380	sp|O77775|NCF2_BOVIN	-0.0218184	1.02558	Not Interesting
35152	g21555	NA	0.0589654	0.416454	Not Interesting
35159	g21556	NA	0.827394	0.236143	Not Interesting
35165	g21559	sp|Q9UHV9|PFD2_HUMAN	0.477929	0.371048	Not Interesting
35175	g21563	sp|Q9QUJ7|ACSL4_MOUSE	-0.478397	-0.685963	Not Interesting
35248	g10576	NA	-0.233317	-0.747759	Not Interesting
35253	g10580	sp|H2LBU8|YAP1_ORYLA	-0.278897	-0.953542	Not Interesting
35296	g4524	NA	0.679589	0.348605	Not Interesting
35327	g4533	NA	0.401074	0.810764	Not Interesting
3534	g23571	NA	0.400985	0.769736	Not Interesting
35341	g4538	sp|Q9Y2W7|CSEN_HUMAN	-0.438283	-0.888923	Not Interesting
35368	g4545	NA	-0.222027	-0.597174	Not Interesting
35407	g4561	sp|O43660|PLRG1_HUMAN	-0.424796	-0.518672	Not Interesting
3541	g23572	sp|P10394|POL4_DROME	-0.198239	-0.639808	Not Interesting
35443	g4567	NA	0.60167	0.409832	Not Interesting
35451	g4572	sp|O00299|CLIC1_HUMAN	0.513791	0.64331	Not Interesting
35487	g26961	sp|P00976|IBPC_BOVIN	-0.0184001	0.771878	Not Interesting
35501	g26965	sp|P14550|AK1A1_HUMAN	-0.24112	-0.728698	Not Interesting
35531	g15574	NA	-0.598355	-0.623409	Not Interesting
35541	g31098	sp|P97858|S35B1_MOUSE	0.666056	0.579204	Not Interesting
35543	g31098	sp|P97858|S35B1_MOUSE	-0.262717	-0.746833	Not Interesting
35562	g14043	sp|Q95SX7|RTBS_DROME	0.253521	0.669651	Not Interesting
35586	g14049	sp|O00566|MPP10_HUMAN	0.39518	2.04484	Head
35587	g14049	sp|O00566|MPP10_HUMAN	0.195443	0.519165	Not Interesting
35589	g14050	NA	-0.644049	1.01532	Head
35591	g14050	NA	-0.0538745	0.642665	Not Interesting
3575	g23578	sp|A6H619|PHRF1_MOUSE	0.958266	0.714301	Not Interesting
35768	g17551	NA	0.154068	0.63288	Not Interesting
35844	g16165	sp|Q61467|ZIC4_MOUSE	-0.311606	0.602981	Head
35846	g16165	sp|Q61467|ZIC4_MOUSE	-0.621526	1.19253	Head
35859	g16168	sp|Q90593|GRP78_CHICK	1.37206	1.30498	Not Interesting
3589	g23580	sp|Q8CIV8|TBCE_MOUSE	0.86346	0.685933	Not Interesting
35970	g21267	sp|P08548|LIN1_NYCCO	-0.261518	-1.0875	Not Interesting
35975	g21267	sp|P08548|LIN1_NYCCO	-0.745778	-0.464163	Not Interesting
35977	g21268	NA	0.311909	0.489047	Not Interesting
35982	g21270	sp|Q0V7M1|KPSH1_BOVIN	0.217359	0.918295	Not Interesting
35988	g21272	NA	-0.668105	-0.0976456	Not Interesting
35996	g21273	NA	0.810135	2.28982	Not Interesting
35997	g21273	NA	-0.82746	-0.227063	Not Interesting
36016	g21277	sp|P41439|FOLR3_HUMAN	-0.302012	-0.445564	Not Interesting
36051	g8784	sp|A1L1W9|MOT10_DANRE	1.15363	1.21016	Not Interesting
36059	g8784	sp|A1L1W9|MOT10_DANRE	2.21598	1.34796	Not Interesting
36094	g9460	sp|P17900|SAP3_HUMAN	-0.16977	-0.642725	Not Interesting
36105	g21064	NA	-0.789722	-0.571409	Not Interesting
36108	g21065	sp|Q5R9A4|DNJB9_PONAB	1.01662	0.662704	Not Interesting
36126	g21068	sp|P13634|CAH1_MOUSE	-0.807734	-0.134975	Not Interesting
36138	g21076	sp|A4IIJ3|KIBRA_XENTR	-0.74654	-0.398484	Not Interesting
36140	g21076	sp|A4IIJ3|KIBRA_XENTR	-0.659387	-0.170574	Not Interesting
36142	g21076	sp|A4IIJ3|KIBRA_XENTR	-0.725949	-0.240039	Not Interesting
36146	g21076	sp|A4IIJ3|KIBRA_XENTR	-1.22012	0.363869	Head
36147	g21076	sp|A4IIJ3|KIBRA_XENTR	-0.614576	-0.0808982	Not Interesting
36165	g21084	sp|Q6W4X9|MUC6_HUMAN	-0.454699	-0.70491	Not Interesting
36166	g21085	sp|P37235|HPCL1_HUMAN	-0.14985	-0.461273	Not Interesting
36170	g21085	sp|P37235|HPCL1_HUMAN	0.237102	2.41535	Not Interesting
36189	g21088	sp|Q16720|AT2B3_HUMAN	-0.456541	0.0860673	Not Interesting
36200	g21095	sp|Q6IE82|JADE3_MOUSE	-0.680763	-0.63884	Not Interesting
36255	g21118	NA	-0.492457	-0.189569	Not Interesting
36265	g21119	sp|Q5R7U4|GBG2_PONAB	1.52758	1.72021	Not Interesting
36269	g21120	sp|Q99MI1|RB6I2_MOUSE	0.16589	0.698806	Not Interesting
36271	g21120	sp|Q99MI1|RB6I2_MOUSE	0.394953	0.574158	Not Interesting
36277	g21122	NA	-0.879253	-0.745419	Not Interesting
36286	g21123	sp|Q16720|AT2B3_HUMAN	0.328512	0.59479	Not Interesting
3630	g23601	NA	-0.184467	1.68866	Head
36311	g21128	NA	-0.0151635	1.43904	Head
36313	g21128	NA	0.765814	1.25068	Not Interesting
36320	g21131	NA	-0.427878	-0.944206	Not Interesting
36340	g21140	sp|P03934|TC1A_CAEEL	-0.407586	-0.851842	Not Interesting
36355	g21147	sp|P79888|DCAM_XENLA	-1.04048	0.203384	Head
3639	g23604	NA	-0.582341	0.717378	Head
3640	g23604	NA	-0.757171	0.433585	Head
36409	g32534	NA	-0.758833	0.782035	Head
36479	g32551	sp|Q5TCZ1|SPD2A_HUMAN	0.377525	1.05724	Not Interesting
36480	g32551	sp|Q5TCZ1|SPD2A_HUMAN	1.12162	3.18862	Not Interesting
36485	g32551	sp|Q5TCZ1|SPD2A_HUMAN	-0.516334	-0.592091	Not Interesting
36503	g32559	NA	-0.437897	-0.362093	Not Interesting
36538	g30594	sp|Q17770|PDI2_CAEEL	0.700262	0.676172	Not Interesting
36566	g30602	NA	0.235124	2.69628	Head
36573	g30605	sp|Q92179|CHST3_CHICK	0.359595	1.27683	Not Interesting
3658	g23606	NA	-0.503063	-0.492865	Not Interesting
36612	g3641	sp|P11533|DMD_CHICK	-0.226211	0.702316	Head
3662	g23607	sp|Q99LS3|SERB_MOUSE	0.59263	0.93099	Not Interesting
3663	g23607	sp|Q99LS3|SERB_MOUSE	0.842282	1.16942	Not Interesting
36653	g3653	sp|O01367|HOW_DROME	-0.723912	-0.678988	Not Interesting
36684	g3660	NA	0.323471	3.6643	Head
36685	g3660	NA	0.323384	2.92435	Not Interesting
36687	g3660	NA	-0.862133	0.224507	Head
36688	g3660	NA	-0.41045	0.401404	Head
36701	g26390	NA	-0.634923	-0.0737445	Not Interesting
36702	g26390	NA	-0.804928	-0.20798	Not Interesting
36827	g15582	sp|Q670P5|WNT11_XENLA	-0.774789	-0.052013	Not Interesting
36840	g15582	sp|Q670P5|WNT11_XENLA	-1.96598	-1.62181	Not Interesting
36858	g15585	NA	-0.508195	2.04481	Head
3695	g23615	NA	-0.723414	-0.443604	Not Interesting
36955	g4192	sp|Q08AY6|KT5AA_XENLA	0.565834	1.00696	Not Interesting
3701	g23616	NA	0.388874	0.573459	Not Interesting
37035	g15120	sp|Q9CWS0|DDAH1_MOUSE	1.27999	-0.271507	Foot
37038	g15120	sp|Q9CWS0|DDAH1_MOUSE	-0.752301	-0.362626	Not Interesting
3707	g23616	NA	-0.00635268	-0.497613	Not Interesting
37098	g27001	NA	-0.663858	0.509625	Head
37102	g27003	NA	0.520762	0.404276	Not Interesting
37107	g27008	sp|Q9WV54|ASAH1_MOUSE	0.045211	0.666932	Not Interesting
37126	g27009	sp|A3KQV2|BROX_DANRE	-0.304734	-0.532572	Not Interesting
37162	g27032	NA	-0.66149	0.269899	Head
37215	g4299	sp|Q9UDY8|MALT1_HUMAN	-0.407373	-0.759381	Not Interesting
37220	g4300	sp|Q8BH60|GOPC_MOUSE	-0.738217	-0.683375	Not Interesting
37258	g4304	sp|Q04771|ACVR1_HUMAN	-1.39931	-0.0194208	Head
37259	g4304	sp|Q04771|ACVR1_HUMAN	-0.82222	-0.107529	Not Interesting
37321	g4318	NA	0.812028	1.41253	Not Interesting
37327	g4318	NA	1.03957	1.40204	Not Interesting
37334	g4319	NA	0.43405	1.51505	Head
37335	g4319	NA	0.772242	1.59428	Not Interesting
37338	g4319	NA	0.847607	1.11877	Not Interesting
37340	g4319	NA	0.950368	1.23514	Not Interesting
37343	g4319	NA	0.730839	1.10423	Not Interesting
37345	g4319	NA	0.74029	1.16764	Not Interesting
37348	g4324	sp|P22274|ARF_CANAL	-0.358065	-0.27091	Not Interesting
37353	g4324	sp|P22274|ARF_CANAL	0.588387	0.718428	Not Interesting
37399	g4334	sp|Q95029|CATL_DROME	-1.53792	-2.09038	Not Interesting
37401	g4334	sp|Q95029|CATL_DROME	-0.596635	-0.34207	Not Interesting
37416	g4335	sp|Q95029|CATL_DROME	-1.15362	-1.55313	Not Interesting
37417	g4335	sp|Q95029|CATL_DROME	-1.33351	-1.96795	Not Interesting
3748	g12125	sp|Q95NI4|CALM_HALOK	0.551012	1.10229	Not Interesting
37492	g24173	NA	0.352854	0.700982	Not Interesting
37494	g24173	NA	0.573566	0.163934	Not Interesting
37547	g24190	sp|Q921C5|BICD2_MOUSE	-1.36981	-0.931273	Not Interesting
37549	g24190	sp|Q921C5|BICD2_MOUSE	-0.0663453	-0.718777	Not Interesting
37553	g24191	sp|Q28107|FA5_BOVIN	-0.373785	0.772432	Head
37564	g24192	NA	-0.118303	-0.64174	Not Interesting
37630	g24220	sp|Q96RW7|HMCN1_HUMAN	-1.04682	-0.14141	Not Interesting
37689	g29077	NA	0.160197	0.694201	Not Interesting
37750	g29094	NA	-0.32556	-0.533412	Not Interesting
3779	g18801	sp|Q80XJ3|TTC28_MOUSE	-0.333608	-0.611525	Not Interesting
37834	g29591	NA	-0.586814	-0.109402	Not Interesting
37839	g29601	sp|Q6DJN2|TRF6B_XENLA	-0.687744	-0.051278	Not Interesting
37840	g29601	sp|Q6DJN2|TRF6B_XENLA	-0.870559	-0.214767	Not Interesting
37841	g29601	sp|Q6DJN2|TRF6B_XENLA	-0.792995	0.0432245	Head
37849	g29604	sp|Q9BUZ4|TRAF4_HUMAN	-0.495795	-1.30354	Not Interesting
3785	g18802	NA	-0.408367	-0.737783	Not Interesting
37897	g29617	NA	-0.969144	0.381706	Head
37929	g29628	sp|A8WG21|SNXAB_DANRE	-0.404231	-0.570544	Not Interesting
37930	g29628	sp|A8WG21|SNXAB_DANRE	-1.50716	-0.499355	Not Interesting
37956	g22334	NA	-0.455685	0.489129	Head
37993	g2900	sp|Q7S4N5|MCA1B_NEUCR	1.01617	0.49198	Not Interesting
3804	g18805	sp|P35448|TSP1_XENLA	-0.439203	-0.62052	Not Interesting
38045	g2913	NA	-0.514232	-0.737338	Not Interesting
38049	g2913	NA	-0.359007	-0.246438	Not Interesting
38055	g2915	NA	-0.614926	-0.749991	Not Interesting
3808	g18806	sp|P0CB22|ATX2_ARATH	0.393146	-0.48232	Foot
38123	g2942	NA	0.451	0.918456	Not Interesting
3814	g18806	sp|P0CB22|ATX2_ARATH	-0.0579529	-0.948733	Not Interesting
3817	g18807	sp|P49166|RL37A_YEAST	0.461698	0.172238	Not Interesting
38211	g2963	NA	-0.179595	-0.526387	Not Interesting
38303	g10687	sp|Q3SZB4|ACADM_BOVIN	0.600922	0.476514	Not Interesting
38385	g2291	sp|Q9CZR2|NALD2_MOUSE	-1.20775	-1.11766	Not Interesting
3840	g18812	sp|Q66JF3|MKNK1_XENTR	-0.670274	0.107391	Not Interesting
38403	g2295	NA	-0.548479	-0.161523	Not Interesting
3842	g18812	sp|Q66JF3|MKNK1_XENTR	-0.620064	-0.436963	Not Interesting
3845	g18812	sp|Q66JF3|MKNK1_XENTR	-0.428999	-0.118399	Not Interesting
38527	g8869	NA	-0.491349	-0.353711	Not Interesting
38558	g15962	sp|Q9UKJ5|CHIC2_HUMAN	0.345508	0.563709	Not Interesting
38604	g15984	sp|P83941|ELOC_RAT	-0.630305	-0.891364	Not Interesting
38605	g15984	sp|P83941|ELOC_RAT	-0.804252	-0.469141	Not Interesting
38619	g15989	NA	-0.624947	-0.659506	Not Interesting
38626	g15990	sp|Q91WM3|U3IP2_MOUSE	-0.309007	-0.979358	Not Interesting
38643	g15994	NA	-0.533848	-0.214709	Not Interesting
38717	g16024	sp|Q5SVZ6|ZMYM1_HUMAN	0.192409	1.01979	Not Interesting
38719	g16024	sp|Q5SVZ6|ZMYM1_HUMAN	0.432399	0.775155	Not Interesting
38720	g16024	sp|Q5SVZ6|ZMYM1_HUMAN	0.941455	0.882076	Not Interesting
38723	g16024	sp|Q5SVZ6|ZMYM1_HUMAN	-1.47313	0.477281	Head
38724	g16024	sp|Q5SVZ6|ZMYM1_HUMAN	-0.615961	0.60033	Head
38747	g16033	sp|Q09930|DIRA_CAEEL	0.0593694	0.774719	Not Interesting
38761	g16037	NA	-0.0288498	-0.744478	Not Interesting
38774	g16040	sp|P14099|PDE2A_BOVIN	-0.423872	-0.268689	Not Interesting
3880	g18824	sp|Q18246|RAP1_CAEEL	-0.601111	-0.281239	Not Interesting
38848	g16071	sp|Q9LVK9|ALA7_ARATH	0.233923	0.573433	Not Interesting
38852	g16072	sp|Q58DT4|P5CR1_BOVIN	-0.69859	-0.731278	Not Interesting
38853	g16072	sp|Q58DT4|P5CR1_BOVIN	-1.14889	-0.66295	Not Interesting
38857	g16073	NA	0.292593	0.753197	Not Interesting
3888	g18825	sp|A8XNX8|LGC4_CAEBR	-0.846267	-0.57931	Not Interesting
38904	g15810	sp|Q9QYS2|GRM3_MOUSE	-0.329252	-0.797524	Not Interesting
38945	g2404	NA	-0.29212	-0.472792	Not Interesting
39021	g2437	NA	-0.8213	-0.262268	Not Interesting
39093	g2463	sp|P50025|DNAJ_LEGPN	-0.755156	-0.991586	Not Interesting
39101	g2467	NA	-0.688231	-0.0985285	Not Interesting
39127	g2473	sp|Q9HCI6|K1586_HUMAN	-0.657964	-0.855152	Not Interesting
39146	g2479	sp|Q5PQ44|CD022_XENLA	-0.756281	-0.287953	Not Interesting
39152	g2480	sp|Q4QRK0|MAP11_DANRE	0.43756	0.288497	Not Interesting
39188	g2488	NA	-0.76345	-0.294081	Not Interesting
39227	g31026	sp|O35426|XBP1_MOUSE	-1.024	-0.503563	Not Interesting
39260	g31028	sp|Q8CIE2|ZMIZ2_MOUSE	-0.882373	-0.200134	Not Interesting
39288	g22288	NA	-0.642235	-0.0221017	Not Interesting
39295	g22293	NA	-0.647503	-0.853073	Not Interesting
39311	g22300	sp|Q7SZ59|RASLC_DANRE	-0.827556	-0.826457	Not Interesting
39345	g22314	sp|Q9H841|NPAL2_HUMAN	-0.393941	-0.428718	Not Interesting
39362	g22317	sp|Q0VCJ7|RERG_BOVIN	-0.242362	0.697059	Head
39385	g22325	sp|P27075|RL44_CANTR	0.668337	0.32296	Not Interesting
39431	g15344	NA	-0.56656	-0.224222	Not Interesting
3945	g18842	sp|Q6DID7|WLS_MOUSE	0.0802544	0.627366	Head
39457	g15359	sp|O60481|ZIC3_HUMAN	-0.375624	-0.744018	Not Interesting
39458	g15359	sp|O60481|ZIC3_HUMAN	-0.88296	-0.448413	Not Interesting
3946	g18842	sp|Q6DID7|WLS_MOUSE	0.657254	1.226	Not Interesting
39460	g15359	sp|O60481|ZIC3_HUMAN	0.266321	0.564783	Not Interesting
39522	g5506	NA	-0.845444	-0.550197	Not Interesting
39535	g5516	sp|P33527|MRP1_HUMAN	0.243481	0.682275	Not Interesting
39540	g5519	sp|Q5F364|MRP1_CHICK	0.452485	0.484059	Not Interesting
39565	g5525	sp|P11308|ERG_HUMAN	-0.973134	0.898942	Head
39604	g5534	sp|P39896|TCMO_STRGA	-0.88539	-0.922952	Not Interesting
39630	g5542	sp|P0CH27|RL402_TRYCR	0.592314	0.434943	Not Interesting
39637	g5548	sp|P47820|ACE_RAT	-0.234054	-0.463087	Not Interesting
39744	g21684	sp|Q8VE62|PAIP1_MOUSE	-0.0559997	-0.637791	Not Interesting
3982	g19618	sp|P11442|CLH1_RAT	-0.490334	-0.0313408	Not Interesting
39903	g27820	sp|Q9VDS6|SURF6_DROME	-0.639948	-0.416946	Not Interesting
39942	g27825	sp|Q27415|NLP_DROME	0.514204	0.23839	Not Interesting
39965	g27837	NA	0.0903446	1.20588	Not Interesting
40061	g29493	sp|B5XCB8|THAP1_SALSA	-0.766411	-0.138242	Not Interesting
40066	g29493	sp|B5XCB8|THAP1_SALSA	-0.178174	-0.551719	Not Interesting
40069	g29493	sp|B5XCB8|THAP1_SALSA	-0.432072	-0.286517	Not Interesting
40082	g29496	sp|Q5W4S4|FNIP1_CHICK	-0.120637	-0.680246	Not Interesting
40094	g29498	NA	-0.650605	-0.127474	Not Interesting
40113	g13793	NA	-0.824155	-1.13412	Not Interesting
40179	g33631	sp|Q90839|DKK3_CHICK	-0.496428	-0.479641	Not Interesting
40243	g33661	sp|Q5R733|CPEB1_PONAB	-0.357113	-0.701132	Not Interesting
40267	g33666	sp|Q8IZF6|AGRG4_HUMAN	-0.915759	0.0954735	Head
4027	g10197	sp|Q58T08|ISM2_DANRE	-0.268142	-1.08029	Not Interesting
40271	g33667	NA	0.444328	0.374353	Not Interesting
40284	g33668	sp|Q9P2R6|RERE_HUMAN	-0.353593	0.00879282	Not Interesting
40286	g33668	sp|Q9P2R6|RERE_HUMAN	-0.426698	-0.112913	Not Interesting
40289	g33668	sp|Q9P2R6|RERE_HUMAN	1.09145	0.442932	Not Interesting
40295	g33670	NA	-0.40183	-0.389107	Not Interesting
40297	g33670	NA	-0.40295	-0.333377	Not Interesting
40299	g33670	NA	-0.37404	-0.404855	Not Interesting
40300	g33670	NA	0.935445	0.699911	Not Interesting
40359	g26462	sp|Q4R532|SYNG1_MACFA	-0.544127	-0.74467	Not Interesting
40376	g17202	sp|P70191|TRAF5_MOUSE	0.0884711	0.295658	Not Interesting
40472	g17233	sp|Q04202|TCB2_CAEBR	-0.653319	-0.321731	Not Interesting
40492	g17240	sp|Q9P0X4|CAC1I_HUMAN	-0.207161	-0.863469	Not Interesting
40502	g17241	NA	-0.43264	-0.707277	Not Interesting
4051	g20598	sp|Q9DBN1|STR6L_MOUSE	-1.12281	-0.338737	Not Interesting
40566	g17270	sp|P00630|PA2_APIME	-0.62252	-0.501302	Not Interesting
40572	g17271	sp|O00418|EF2K_HUMAN	-0.568007	-0.818067	Not Interesting
4062	g20600	sp|Q80TI0|GRM1B_MOUSE	-0.381544	-0.172031	Not Interesting
40668	g17298	sp|P12849|KAP1_MOUSE	-0.873009	-1.21551	Not Interesting
40688	g17309	sp|Q8IWB9|TEX2_HUMAN	-0.556135	-0.67606	Not Interesting
40705	g17315	sp|Q8RPX2|AGUA_LACSS	-0.512431	-0.662669	Not Interesting
40760	NA	NA	-1.09462	-1.7321	Not Interesting
40761	NA	NA	-0.361359	-0.644945	Not Interesting
40764	NA	NA	-0.814454	-1.42297	Not Interesting
40795	g7186	sp|Q5F478|ANR44_CHICK	1.2186	1.05183	Not Interesting
40823	g10483	sp|Q5XXP2|OPN4_PHOSU	0.254504	0.957343	Not Interesting
40876	g16764	NA	-0.0354013	0.639994	Not Interesting
40890	g16768	NA	-0.481596	-0.605679	Not Interesting
40913	g16770	sp|O01727|RS6_BRAFL	0.321903	0.159247	Not Interesting
40921	g16772	sp|P08155|KRH1_DROME	-0.38581	-0.539863	Not Interesting
4094	g20603	sp|Q99J45|NRBP_MOUSE	0.907419	0.627923	Not Interesting
40974	g16790	sp|Q7ZUB2|RS17_COTJA	0.603345	0.262174	Not Interesting
41015	g16800	sp|Q96DM1|PGBD4_HUMAN	-0.428045	-0.690549	Not Interesting
41016	g16800	sp|Q96DM1|PGBD4_HUMAN	-0.590288	-0.244729	Not Interesting
41036	g17783	sp|Q8K4H1|KFA_MOUSE	-1.19473	-1.19908	Not Interesting
41045	g17786	NA	-0.0555475	0.522303	Not Interesting
41050	g17787	sp|P57729|RAB38_HUMAN	-1.72829	0.364574	Head
4107	g20603	sp|Q99J45|NRBP_MOUSE	0.200739	1.04611	Not Interesting
41080	g17795	sp|Q61847|MEP1B_MOUSE	-0.925249	-1.10207	Not Interesting
4111	g20604	sp|Q26486|FKBP4_SPOFR	-1.00644	-0.18724	Not Interesting
4116	g20604	sp|Q26486|FKBP4_SPOFR	-0.689967	-0.651719	Not Interesting
4120	g20604	sp|Q26486|FKBP4_SPOFR	-0.712619	-0.568379	Not Interesting
4127	g20605	sp|P37380|RL17_PODCA	0.648851	0.435875	Not Interesting
41276	g30964	NA	-0.750623	-0.695191	Not Interesting
41344	g30982	sp|A0JP85|CNOT1_XENTR	-0.508148	-0.386733	Not Interesting
4137	g20610	NA	-1.05923	-0.868496	Not Interesting
41419	g27386	NA	-0.232423	0.753468	Not Interesting
41420	g27386	NA	-0.526892	-0.0390272	Not Interesting
41443	g27399	NA	-0.76925	-0.68351	Not Interesting
41456	g27404	sp|Q9UHJ3|SMBT1_HUMAN	-0.57143	-0.670503	Not Interesting
41470	g27409	sp|Q6GNY1|MIB1_XENLA	-0.546089	-0.375729	Not Interesting
41472	g27409	sp|Q6GNY1|MIB1_XENLA	-0.539701	-0.586122	Not Interesting
4150	g20613	NA	-0.491625	0.58079	Head
41505	g27416	NA	-0.39672	-0.190889	Not Interesting
41598	g27447	NA	-1.15858	0.202114	Head
41608	g27448	sp|Q8K4Q7|CERK1_MOUSE	-0.625944	-0.879312	Not Interesting
41628	g27454	NA	-0.703763	-0.514279	Not Interesting
41633	g27456	sp|Q18246|RAP1_CAEEL	0.450925	0.178299	Not Interesting
41651	g27473	NA	-0.405861	-0.173844	Not Interesting
41655	g27478	NA	0.307561	0.471156	Not Interesting
41661	g27484	sp|J7FCF0|DMR3T_HORSE	0.768387	1.10034	Not Interesting
41670	g27490	NA	0.253823	0.592897	Not Interesting
4168	g20632	NA	-0.216142	1.04894	Head
41711	g27497	NA	-0.256153	-0.586876	Not Interesting
4172	g20636	sp|P42026|NDUS7_BOVIN	-0.873005	-0.673565	Not Interesting
41740	NA	NA	0.369762	0.20565	Not Interesting
41754	g33309	NA	-0.869411	0.198749	Head
41771	g33315	sp|Q6S9Z5|ZN474_HUMAN	0.325819	0.4785	Not Interesting
4179	g20637	sp|A2VDZ3|MEF2A_BOVIN	0.0231617	1.02289	Not Interesting
41797	NA	NA	0.395089	0.638627	Not Interesting
41804	g14683	NA	-0.561959	-0.593181	Not Interesting
4185	g20637	sp|A2VDZ3|MEF2A_BOVIN	-0.36195	0.0805496	Not Interesting
4186	g20637	sp|A2VDZ3|MEF2A_BOVIN	-0.43783	-0.394286	Not Interesting
41883	g31745	NA	-0.94966	-1.06978	Not Interesting
4192	g20640	sp|Q25197|HTK7_HYDVU	-0.63148	-1.14189	Not Interesting
41922	g25741	NA	-0.794478	-1.37115	Not Interesting
41967	g25762	sp|Q10651|A4_CAEEL	0.463621	0.342665	Not Interesting
41969	g25762	sp|Q10651|A4_CAEEL	-0.251017	-0.378932	Not Interesting
41971	g25762	sp|Q10651|A4_CAEEL	0.489196	1.67298	Not Interesting
41979	g25766	NA	-0.573442	-0.782746	Not Interesting
42027	g21401	NA	1.73404	1.87588	Not Interesting
42293	g12179	NA	0.462966	0.567867	Not Interesting
4233	g20654	sp|B3EWZ8|ECT_ACRMI	-0.0984181	-0.630972	Not Interesting
42425	g12223	sp|D3ZDI6|MYLIP_RAT	-0.553261	0.121295	Not Interesting
42453	g12232	sp|P33402|GCYA2_HUMAN	-0.416159	1.13132	Head
42457	g12232	sp|P33402|GCYA2_HUMAN	-0.761935	-0.463835	Not Interesting
42469	g12236	NA	-0.72307	0.203372	Head
42470	g12236	NA	-1.10541	-0.135195	Not Interesting
42528	g19644	NA	-0.165888	1.44052	Not Interesting
42540	g19650	sp|Q9FT69|RQSIM_ARATH	-0.930175	-0.285419	Not Interesting
42610	g19680	sp|Q503Y4|OVCA2_DANRE	0.046834	0.486857	Not Interesting
42671	NA	NA	1.4975	1.65267	Not Interesting
42680	g20323	NA	1.11184	0.831288	Not Interesting
42681	g20323	NA	1.1068	0.956374	Not Interesting
42721	g11338	NA	-0.353211	-0.568386	Not Interesting
42729	g11339	NA	-0.747305	-0.850443	Not Interesting
42731	g11341	NA	-0.504853	-0.769761	Not Interesting
42770	g11351	sp|Q7SIB2|CO4A1_BOVIN	0.838036	0.980746	Not Interesting
42771	g11351	sp|Q7SIB2|CO4A1_BOVIN	1.74886	1.6076	Not Interesting
42772	g11352	sp|P08120|CO4A1_DROME	2.31836	2.17699	Not Interesting
42784	g11355	sp|P27393|CO4A2_ASCSU	1.53071	1.57735	Not Interesting
4279	g20662	sp|Q6UUV9|CRTC1_HUMAN	-0.599128	-0.201096	Not Interesting
42793	g11359	NA	0.906302	0.0947468	Not Interesting
42796	g11361	sp|Q7TNH6|NPHP3_MOUSE	0.375303	0.948097	Not Interesting
42802	g11363	sp|P35520|CBS_HUMAN	-0.713233	-0.849489	Not Interesting
42804	g11363	sp|P35520|CBS_HUMAN	-0.944191	-1.02961	Not Interesting
42808	g11363	sp|P35520|CBS_HUMAN	-0.734145	-0.733545	Not Interesting
42831	g11373	sp|Q54CS8|PEX6_DICDI	-0.357114	-0.661053	Not Interesting
4285	g20662	sp|Q6UUV9|CRTC1_HUMAN	-0.570736	-0.346909	Not Interesting
42869	g11395	sp|Q9R087|GPC6_MOUSE	-0.421487	-1.31054	Not Interesting
42873	g11395	sp|Q9R087|GPC6_MOUSE	-0.830835	-0.108323	Head
42874	g11395	sp|Q9R087|GPC6_MOUSE	-1.05114	-0.908453	Not Interesting
42875	g11395	sp|Q9R087|GPC6_MOUSE	-0.143109	0.468053	Not Interesting
42904	g11402	NA	-1.10838	0.00761717	Head
42919	g11403	NA	-0.851939	-0.574909	Not Interesting
4296	g20665	NA	-0.0330225	-0.632131	Not Interesting
42990	g8034	NA	-0.991799	-0.256718	Not Interesting
42991	g8035	NA	-0.598959	-0.559833	Not Interesting
43063	g32011	NA	-0.158489	-0.590986	Not Interesting
43081	g13034	sp|P16423|POLR_DROME	0.859229	0.831747	Not Interesting
43108	g13041	sp|Q0IH24|SPEF1_XENLA	-0.502794	0.661389	Head
43168	g10457	sp|Q90ZH9|S17AB_XENLA	-0.318584	0.532322	Head
4321	g20673	sp|A2PYH4|HFM1_HUMAN	-0.39173	-0.652737	Not Interesting
43223	g13586	NA	-0.201263	0.797145	Not Interesting
43228	g13587	sp|Q64121|PRLHR_RAT	0.502923	1.2617	Not Interesting
43229	g13587	sp|Q64121|PRLHR_RAT	0.0339351	1.65489	Not Interesting
43231	g13587	sp|Q64121|PRLHR_RAT	0.528027	0.859419	Not Interesting
43247	g13590	sp|Q54K09|GRLQ_DICDI	-0.00439366	0.673518	Not Interesting
43286	g13598	NA	-0.47163	-1.05128	Not Interesting
43290	g13598	NA	-0.665374	-0.768624	Not Interesting
43302	g13600	sp|A1L3F4|MEX3B_XENLA	-0.511139	-0.206726	Not Interesting
43303	g13600	sp|A1L3F4|MEX3B_XENLA	-0.634568	0.358731	Head
43305	g13600	sp|A1L3F4|MEX3B_XENLA	-0.12622	0.903979	Head
43312	g13601	sp|Q8NDA2|HMCN2_HUMAN	-0.652475	-0.48784	Not Interesting
4333	g20678	NA	-0.212743	-0.723862	Not Interesting
43360	g13612	NA	-0.212498	0.519579	Not Interesting
4337	g20679	NA	-0.83716	-1.03543	Not Interesting
43383	g1515	sp|P28334|5HT1B_MOUSE	-0.239105	-0.553346	Not Interesting
43384	g1515	sp|P28334|5HT1B_MOUSE	-0.129018	-0.581637	Not Interesting
43404	g1519	sp|O61577|KTNA1_STRPU	0.814622	0.421935	Not Interesting
43418	g1520	sp|O95477|ABCA1_HUMAN	-0.243604	0.896266	Head
43419	g1520	sp|O95477|ABCA1_HUMAN	-0.239814	1.08731	Head
43428	g1532	sp|Q9BZC7|ABCA2_HUMAN	-0.679339	-0.327497	Not Interesting
43430	g1533	sp|Q8IZY2|ABCA7_HUMAN	-0.756369	-0.552418	Not Interesting
43494	g8204	NA	-0.560744	-0.41252	Not Interesting
43546	g1973	sp|Q52KG5|KI26A_MOUSE	-0.469646	-0.205166	Not Interesting
43547	g1973	sp|Q52KG5|KI26A_MOUSE	-0.988475	-0.846185	Not Interesting
43678	g2009	sp|P15454|KGUA_YEAST	-0.208381	-0.337201	Not Interesting
43690	g2010	sp|O94827|PKHG5_HUMAN	0.449422	0.216432	Not Interesting
43709	g2012	NA	-0.271979	1.08616	Head
43772	g25200	NA	-0.350285	-0.657234	Not Interesting
43801	g27801	sp|Q5UQ60|YL662_MIMIV	-0.539484	-0.05321	Not Interesting
43811	g27803	NA	-0.0139762	0.575133	Not Interesting
43844	g27806	NA	0.113113	1.02092	Not Interesting
43845	g27806	NA	-0.205286	-0.399021	Not Interesting
43851	g27808	NA	-0.464362	-0.186227	Not Interesting
43866	g27812	NA	-0.574386	-0.90403	Not Interesting
4389	g23694	sp|Q6P5H6|FRMD5_MOUSE	-0.100896	-0.583425	Not Interesting
43891	g27814	sp|Q6AZT7|NPHP3_XENLA	0.852875	1.11644	Not Interesting
44	g5789	sp|Q7SY06|HACD3_DANRE	0.785721	1.22417	Not Interesting
44026	g30442	NA	0.196514	1.10927	Head
44029	g30442	NA	0.302473	2.27358	Head
44041	g30446	sp|P10079|FBP1_STRPU	-0.304475	-0.476353	Not Interesting
44126	g30466	NA	-0.503899	-0.662076	Not Interesting
44128	g30467	sp|P70031|CCKAR_XENLA	0.208761	0.925725	Not Interesting
44129	g30467	sp|P70031|CCKAR_XENLA	-0.240017	-0.898393	Not Interesting
44153	g21368	NA	-0.176369	-0.590925	Not Interesting
44164	g21372	sp|Q14562|DHX8_HUMAN	-0.657992	0.0687787	Not Interesting
442	g17117	NA	-0.282667	-0.794945	Not Interesting
44240	g10910	NA	-0.224815	-0.625119	Not Interesting
44290	g11444	sp|Q9H7M6|ZSWM4_HUMAN	-0.386062	-0.285058	Not Interesting
44291	g11445	sp|B4F777|HMGN5_RAT	-0.468917	0.451102	Head
44334	g11456	NA	-0.474433	-0.501635	Not Interesting
44453	g29631	sp|P21328|RTJK_DROME	-0.537151	-1.04136	Not Interesting
44476	g29638	sp|P10039|TENA_CHICK	-0.514265	-0.123347	Not Interesting
44493	g29640	sp|Q8BFY9|TNPO1_MOUSE	-0.769988	-0.486868	Not Interesting
44545	g24306	sp|Q68EF4|GRM4_MOUSE	-0.224666	-0.590991	Not Interesting
44566	g24313	sp|Q9QYS2|GRM3_MOUSE	-0.534877	-0.624953	Not Interesting
44666	g24725	NA	0.161038	0.703242	Not Interesting
44708	g9039	NA	-0.384778	-0.857791	Not Interesting
44721	g9045	sp|Q91998|BRN3_CHICK	-0.393748	0.103959	Not Interesting
44735	g9051	sp|Q95SX7|RTBS_DROME	-0.251341	-0.751951	Not Interesting
4474	g31033	sp|Q9VBW3|CAD96_DROME	0.0962977	0.510098	Not Interesting
4476	g31034	NA	-0.398226	-0.465524	Not Interesting
44769	g9060	sp|A7SA47|EIF3H_NEMVE	-0.765497	-0.817702	Not Interesting
44780	g9063	sp|Q9UPI3|FLVC2_HUMAN	-1.4141	-0.548687	Not Interesting
44785	g9064	NA	-0.376481	-0.93366	Not Interesting
44815	g28212	sp|O17185|SUP9_CAEEL	-0.523933	-0.85494	Not Interesting
44844	g28218	sp|Q5GH73|XKR6_HUMAN	-0.590014	-0.433582	Not Interesting
4487	g31042	sp|P21328|RTJK_DROME	-0.172689	-0.695713	Not Interesting
44873	g28229	sp|Q3SZJ4|PTGR1_BOVIN	-0.548465	-0.710156	Not Interesting
44910	g28244	NA	-0.722428	0.238411	Not Interesting
44911	g28244	NA	0.229704	1.04468	Not Interesting
44971	g28268	NA	-0.910759	-1.06114	Not Interesting
45014	g28284	sp|A1L2I9|T214B_XENLA	0.867685	0.958449	Not Interesting
4502	g31047	sp|Q9FN03|UVR8_ARATH	0.274773	0.730275	Not Interesting
45036	g19129	sp|Q3EAQ5|PTR36_ARATH	-0.711718	-0.8807	Not Interesting
4514	g31056	NA	-0.311409	1.41822	Head
4515	g31057	sp|O54888|RPA2_RAT	-1.49159	0.278496	Head
45158	g21825	NA	-0.309717	-0.734558	Not Interesting
4517	g31057	sp|O54888|RPA2_RAT	-0.896451	0.502479	Head
45177	g21831	sp|Q6QMZ4|RL6_CHILA	0.417304	0.160962	Not Interesting
45284	g26249	NA	-0.617443	-0.550734	Not Interesting
45297	g26255	NA	0.974813	1.57566	Not Interesting
45336	g29989	NA	0.00727134	0.806433	Not Interesting
4538	g31064	sp|Q6ZNG9|KRBA2_HUMAN	0.364965	0.261238	Not Interesting
45383	g30012	NA	-1.25111	-0.722367	Not Interesting
45433	g30036	sp|Q6NSQ7|LTV1_MOUSE	-0.617588	-0.33678	Not Interesting
45440	g30037	sp|Q9SKX0|AB13C_ARATH	-0.138333	0.754345	Not Interesting
45525	g30066	sp|Q11126|FUT3_BOVIN	-0.676628	-0.637908	Not Interesting
45547	g30081	sp|Q32MH5|F214A_HUMAN	0.915989	0.660616	Not Interesting
45587	g30094	NA	-0.794233	-1.16361	Not Interesting
45592	g30095	sp|Q6Z1C0|NUCL1_ORYSJ	0.465906	0.16093	Not Interesting
45758	g3107	NA	0.325448	0.68265	Not Interesting
45769	g3108	sp|Q0V9R4|CCD39_XENTR	-0.967806	-1.0443	Not Interesting
4582	g4685	sp|O95490|AGRL2_HUMAN	0.610262	0.448473	Not Interesting
45824	g3126	sp|G5E8K5|ANK3_MOUSE	0.725905	1.28084	Not Interesting
45827	g3127	sp|Q9VCZ3|OCTB1_DROME	-0.466294	-0.661952	Not Interesting
45843	g3130	sp|P58021|TM9S2_MOUSE	-0.441306	-0.501582	Not Interesting
45906	g13058	sp|H6BDU4|SODC_CAMDR	1.25082	1.48317	Not Interesting
45936	g13067	NA	-0.498731	-0.987076	Not Interesting
45951	g13083	sp|P17491|INHBB_RAT	-0.558019	0.119175	Not Interesting
45972	g13087	NA	-1.02699	-0.24149	Not Interesting
45973	g13087	NA	-0.397834	-0.502524	Not Interesting
45975	g13087	NA	-0.586154	-0.640609	Not Interesting
45977	g13087	NA	-0.823144	-0.437424	Not Interesting
46056	g13107	NA	-0.0268175	-0.495643	Not Interesting
46060	g13108	sp|Q8CHN6|SGPL1_RAT	-0.312458	-0.523527	Not Interesting
46066	g13109	NA	-0.390507	-0.546841	Not Interesting
46086	g13121	sp|Q9Y2U5|M3K2_HUMAN	0.23853	-1.35197	Foot
46247	g24406	sp|P11362|FGFR1_HUMAN	0.302392	0.897029	Not Interesting
46250	g24406	sp|P11362|FGFR1_HUMAN	-0.796122	-1.09051	Not Interesting
46256	g24406	sp|P11362|FGFR1_HUMAN	0.256928	-0.643803	Foot
46289	g10885	NA	-0.333268	-0.53755	Not Interesting
46349	g5099	sp|E9Q7T7|CHADL_MOUSE	-0.444146	-0.236449	Not Interesting
464	g5003	sp|Q9H4G4|GAPR1_HUMAN	0.0814066	0.386345	Not Interesting
46427	g24294	sp|Q9JHJ7|TEST_MOUSE	-0.654401	-0.0742089	Not Interesting
46428	g24294	sp|Q9JHJ7|TEST_MOUSE	-1.19293	-1.04678	Not Interesting
4643	g786	NA	1.00141	0.962695	Not Interesting
46479	g32332	sp|A1L1V4|LOL2B_DANRE	0.505649	0.629222	Not Interesting
4651	g15198	NA	-0.512911	-0.340635	Not Interesting
46510	g32336	sp|Q9H5L6|THAP9_HUMAN	0.863065	1.48332	Not Interesting
46521	g32341	sp|Q8N8S7|ENAH_HUMAN	-0.242036	-0.458599	Not Interesting
46523	g32341	sp|Q8N8S7|ENAH_HUMAN	-0.141505	0.600326	Not Interesting
4660	g15202	sp|P50123|AMPE_RAT	-0.3848	-0.592889	Not Interesting
46602	g32359	NA	-1.09331	0.0691229	Head
46606	g32361	sp|O08608|OAZ2_MOUSE	-0.657528	-0.710261	Not Interesting
46607	g32361	sp|O08608|OAZ2_MOUSE	-0.471812	-0.153998	Not Interesting
46609	g32361	sp|O08608|OAZ2_MOUSE	-0.596764	-1.11593	Not Interesting
46615	g32362	sp|Q3U1V8|M3K9_MOUSE	-0.616283	-0.601822	Not Interesting
46632	g32363	sp|O15040|TCPR2_HUMAN	-0.746721	-0.320499	Not Interesting
46699	g32389	NA	-0.0253287	-0.605514	Not Interesting
46701	g32389	NA	-0.613397	-0.0823342	Not Interesting
46721	g32399	sp|Q6NUC1|CNFNA_XENLA	-0.779893	-0.828469	Not Interesting
46755	g13139	NA	-0.650063	0.0286993	Head
4681	g15212	NA	-0.526995	-0.129897	Not Interesting
4682	g15212	NA	-0.848681	-0.927544	Not Interesting
46822	g13156	sp|Q24533|DICH_DROME	-0.225951	-0.66209	Not Interesting
4683	g15212	NA	-0.97093	-0.662287	Not Interesting
46907	g30157	sp|Q4SSF5|LTOR3_TETNG	-0.595261	-0.789968	Not Interesting
46917	g30158	sp|A0R5N0|EGTB_MYCS2	-0.579306	-0.644122	Not Interesting
46918	g30158	sp|A0R5N0|EGTB_MYCS2	-0.583673	-0.58018	Not Interesting
46923	g30158	sp|A0R5N0|EGTB_MYCS2	-0.0409152	-0.784791	Not Interesting
46928	g30159	NA	-0.35126	-0.572537	Not Interesting
46935	g30160	NA	-0.152101	-0.41801	Not Interesting
46936	g30160	NA	-1.01364	-0.604457	Not Interesting
46937	g30160	NA	-0.53112	-0.834893	Not Interesting
46949	g30160	NA	-1.21164	-2.53979	Not Interesting
46950	g30160	NA	-0.441832	-1.59273	Not Interesting
46961	g30160	NA	-0.720972	-0.271939	Not Interesting
46969	g30161	NA	-0.996095	-0.565109	Not Interesting
46970	g30161	NA	-0.647911	-0.596247	Not Interesting
46976	g30161	NA	-1.06662	-0.747249	Not Interesting
46985	NA	NA	-0.498556	-0.852172	Not Interesting
4706	g15223	sp|Q8BH31|MFSD8_MOUSE	-1.6295	-1.93931	Not Interesting
47063	g30994	NA	-0.352514	-0.538689	Not Interesting
47070	g30995	sp|Q64605|PTPRS_RAT	-0.144545	-0.67928	Not Interesting
47126	g31010	sp|P32717|YJCS_ECOLI	-0.351654	-0.504409	Not Interesting
4716	g15226	sp|A6YP92|ARX_RAT	-0.0760414	1.81619	Head
47167	g2616	sp|Q4UMH6|Y381_RICFE	-0.224468	-0.540602	Not Interesting
4717	g15226	sp|A6YP92|ARX_RAT	-0.482382	0.273735	Head
47185	g2621	sp|Q8BYM7|RSH4A_MOUSE	-0.696372	-0.704805	Not Interesting
47187	g2621	sp|Q8BYM7|RSH4A_MOUSE	-0.837524	-0.555669	Not Interesting
47189	g2621	sp|Q8BYM7|RSH4A_MOUSE	-0.416781	-0.170819	Not Interesting
4719	g15226	sp|A6YP92|ARX_RAT	-0.456857	0.674158	Head
47190	g2621	sp|Q8BYM7|RSH4A_MOUSE	-0.0256191	0.683115	Not Interesting
47253	g2642	sp|Q7Z494|NPHP3_HUMAN	0.502929	0.310658	Not Interesting
47310	g17966	NA	-0.499147	-0.481981	Not Interesting
47413	g13955	NA	-0.821504	-0.702722	Not Interesting
47418	g13958	NA	-0.129924	0.534633	Not Interesting
47419	g13958	NA	-0.0294729	0.782816	Not Interesting
47421	g13958	NA	0.368099	0.790904	Not Interesting
47423	g13958	NA	0.273302	0.83622	Not Interesting
47436	g13958	NA	-0.433962	-0.471244	Not Interesting
47442	g13958	NA	-0.814996	-0.631065	Not Interesting
47472	g13962	sp|Q9JJA9|GRASP_MOUSE	-1.1596	-0.0778964	Head
47473	g13962	sp|Q9JJA9|GRASP_MOUSE	-0.84022	-0.694376	Not Interesting
47476	g13964	NA	0.467807	0.998747	Not Interesting
47484	g13968	sp|Q5SVZ6|ZMYM1_HUMAN	-0.551172	-0.694602	Not Interesting
47513	g13980	sp|Q9TWL9|COMA_CONMA	-0.351901	-0.773676	Not Interesting
47565	g13997	NA	-0.452046	0.290235	Head
47625	g9438	NA	-0.947007	-0.869531	Not Interesting
4765	g15241	sp|O43603|GALR2_HUMAN	-0.477432	-0.0480108	Not Interesting
4767	g15241	sp|O43603|GALR2_HUMAN	-0.312541	0.755079	Head
4768	g15241	sp|O43603|GALR2_HUMAN	-0.609099	0.0552403	Head
47703	g13686	sp|P46824|KLC_DROME	0.470308	0.623793	Not Interesting
4771	g15242	sp|O08726|GALR2_RAT	0.0622353	0.671349	Not Interesting
47711	g13689	sp|Q8N9W6|BOLL_HUMAN	0.538609	0.41052	Not Interesting
4774	g15242	sp|O08726|GALR2_RAT	-0.704717	-0.39293	Not Interesting
47747	g13698	sp|Q804X9|OPN4A_GADMO	-0.598757	-0.581712	Not Interesting
4776	g15243	NA	0.698792	1.04148	Not Interesting
4777	g15243	NA	-1.41876	0.0562269	Not Interesting
4778	g15243	NA	-0.783249	-0.0292255	Not Interesting
4779	g15244	sp|Q9H4K1|RIBC2_HUMAN	-0.438423	-0.193512	Not Interesting
47835	g13729	sp|P45953|ACADV_RAT	0.574495	0.619745	Not Interesting
47844	g13731	sp|Q95SX7|RTBS_DROME	-0.0528059	0.589093	Not Interesting
47847	g13730	sp|P42325|NCAH_DROME	0.736478	2.58159	Head
47918	g12710	sp|P35283|RAB12_MOUSE	0.094189	0.891589	Not Interesting
47919	g12710	sp|P35283|RAB12_MOUSE	0.866998	2.11006	Not Interesting
47920	g12710	sp|P35283|RAB12_MOUSE	0.149269	0.717997	Not Interesting
47921	g12710	sp|P35283|RAB12_MOUSE	0.278314	1.01741	Not Interesting
47922	g12710	sp|P35283|RAB12_MOUSE	0.406104	1.3953	Head
47924	g12710	sp|P35283|RAB12_MOUSE	0.685241	1.67258	Not Interesting
47926	g12711	NA	-1.0201	-0.984267	Not Interesting
47932	g12714	NA	0.506964	1.00418	Not Interesting
47937	g12715	NA	-0.606945	-0.470963	Not Interesting
47951	g12723	sp|Q7Z5P9|MUC19_HUMAN	-0.527552	-0.174358	Not Interesting
47955	g12724	sp|Q99323|MYSN_DROME	0.264626	0.900962	Not Interesting
47983	g12732	sp|Q8CIS0|CAR11_MOUSE	-0.630434	0.223106	Head
47987	g12733	NA	0.202224	-0.56048	Not Interesting
48010	g12734	sp|A0AVF1|IFT56_HUMAN	-0.410024	0.408267	Head
48016	g12734	sp|A0AVF1|IFT56_HUMAN	0.163293	0.459793	Not Interesting
48022	g12737	NA	-0.507103	-0.0132412	Not Interesting
48046	g12747	sp|Q9BXL7|CAR11_HUMAN	-0.487709	-0.53969	Not Interesting
48139	g4584	NA	-0.415764	-0.630194	Not Interesting
48148	g4587	NA	-0.815005	-0.217584	Not Interesting
48152	g4592	sp|Q8C2A2|SEN54_MOUSE	0.190622	0.817351	Not Interesting
48155	g4593	sp|Q8WXI3|ASB10_HUMAN	1.81823	2.29539	Not Interesting
48175	g4599	sp|P43146|DCC_HUMAN	0.0539501	1.48449	Head
48184	g4606	sp|Q0ZLH3|PJVK_HUMAN	-1.3528	-0.610734	Not Interesting
48208	g4608	sp|Q9NRK6|ABCBA_HUMAN	0.218535	0.771353	Not Interesting
48250	g4618	sp|P51523|ZNF84_HUMAN	0.170866	1.31095	Head
48289	g4633	sp|Q5SP67|WDR26_DANRE	-0.624498	-0.397731	Not Interesting
48292	g4634	sp|P49961|ENTP1_HUMAN	-0.826136	-0.368601	Not Interesting
48345	g4661	NA	-0.632875	-0.862879	Not Interesting
48379	g743	sp|P0C6F1|DYH2_MOUSE	0.208397	0.655997	Not Interesting
4843	g15277	NA	-0.594231	-0.423133	Not Interesting
48507	g9635	NA	-0.312223	-0.720482	Not Interesting
4851	g15277	NA	-1.16065	0.191351	Head
48539	g9645	NA	-0.202441	-0.331047	Not Interesting
48681	g5503	NA	-0.700541	0.0223525	Not Interesting
48683	g5503	NA	-0.509283	-0.262254	Not Interesting
48708	g10770	NA	0.662994	0.593459	Not Interesting
48750	g10779	sp|Q5EA92|AL14E_BOVIN	0.417976	0.481511	Not Interesting
48803	g10796	sp|Q84PB3|IF4G1_ORYSJ	-0.852086	-0.868747	Not Interesting
48930	g11880	sp|Q17RW2|COOA1_HUMAN	0.872301	0.21885	Not Interesting
48962	g4815	sp|Q9VW26|OAT_DROME	-0.579271	-0.457888	Not Interesting
48963	g4815	sp|Q9VW26|OAT_DROME	-0.639841	-0.233625	Not Interesting
48975	g4818	sp|Q86UB9|TM135_HUMAN	-1.43855	-1.25134	Not Interesting
48999	g4835	sp|P50747|BPL1_HUMAN	-0.568311	-0.849213	Not Interesting
49018	g4847	NA	0.359892	0.351633	Not Interesting
49062	g4874	sp|Q5VYJ5|MALR1_HUMAN	-0.647153	-0.844156	Not Interesting
49104	g4881	NA	0.643141	0.468532	Not Interesting
49116	g7324	NA	-0.796698	0.107822	Not Interesting
49139	g17038	NA	-1.03669	-0.185244	Head
49141	g17038	NA	-0.665207	-0.211625	Not Interesting
49158	g17042	sp|Q8IZF6|AGRG4_HUMAN	0.23596	0.712388	Not Interesting
49159	g17042	sp|Q8IZF6|AGRG4_HUMAN	0.259895	0.669276	Not Interesting
4921	g19568	NA	1.00463	1.08737	Not Interesting
49211	g17052	sp|Q9ZCN4|Y689_RICPR	1.79102	2.23725	Not Interesting
49219	g17055	NA	1.60983	2.01518	Not Interesting
4923	g19568	NA	0.494741	0.829351	Not Interesting
4924	g19568	NA	2.4197	2.06578	Not Interesting
4926	g19569	NA	-0.471071	-0.127791	Not Interesting
4937	g19577	sp|Q9R1T3|CATZ_RAT	-0.431372	-0.648637	Not Interesting
49509	g27299	NA	-0.255491	-0.359507	Not Interesting
49555	g27311	NA	-0.504116	-0.134546	Not Interesting
49556	g27311	NA	-0.467949	-0.0558085	Not Interesting
49559	g27313	NA	0.0107589	-0.449444	Not Interesting
49562	g27314	NA	-0.691943	-0.541405	Not Interesting
49604	g27327	sp|Q9CR58|KMCP1_MOUSE	-0.665651	-0.702781	Not Interesting
49605	g27327	sp|Q9CR58|KMCP1_MOUSE	-0.483258	-0.377846	Not Interesting
49608	g27329	sp|P51121|GLNA_XENLA	-0.568574	-0.768514	Not Interesting
49612	g27329	sp|P51121|GLNA_XENLA	-0.812657	-0.35202	Not Interesting
49618	g27330	sp|Q04831|GLNA_PANAR	0.202292	0.754696	Not Interesting
49639	g27334	sp|Q04831|GLNA_PANAR	-0.436061	0.634189	Head
49640	g27334	sp|Q04831|GLNA_PANAR	-0.234868	0.556081	Head
49666	g27341	sp|Q9Z2W1|STK25_MOUSE	-0.458527	-0.594729	Not Interesting
49705	g27355	NA	0.60963	0.492374	Not Interesting
49730	g27363	sp|P10515|ODP2_HUMAN	0.258603	0.966589	Not Interesting
49731	g27363	sp|P10515|ODP2_HUMAN	-1.00204	0.173739	Head
49732	g27364	sp|P91943|PANG1_DROME	0.0579325	0.385182	Not Interesting
49735	g27364	sp|P91943|PANG1_DROME	0.14885	2.65674	Head
49762	g3957	sp|Q803Q2|NDL1B_DANRE	-0.587471	-0.732877	Not Interesting
4979	g19594	NA	-0.667162	-0.488959	Not Interesting
49796	g3974	sp|Q6S5C2|GNPTG_MOUSE	0.136813	0.697194	Not Interesting
49797	g3974	sp|Q6S5C2|GNPTG_MOUSE	0.280741	0.612853	Not Interesting
49801	g3974	sp|Q6S5C2|GNPTG_MOUSE	-0.478391	-0.557458	Not Interesting
49806	g3975	NA	-0.722652	-0.462691	Not Interesting
49848	g14466	sp|Q5R5T8|SVOP_PONAB	-0.407392	0.0393729	Not Interesting
49867	g14472	sp|Q8BVU5|NUDT9_MOUSE	-0.503476	-0.305449	Not Interesting
4988	g19597	NA	0.286471	0.743139	Not Interesting
49900	g14484	NA	-0.490849	-0.683355	Not Interesting
49941	g14494	sp|Q61097|KSR1_MOUSE	-0.545315	-1.11832	Not Interesting
49969	g14504	NA	-0.167791	-0.549614	Not Interesting
4997	g19602	sp|Q03347|RUNX1_MOUSE	-1.28617	-1.24773	Not Interesting
49972	g14504	NA	-0.0381851	-0.663474	Not Interesting
50055	g14525	sp|Q96AY4|TTC28_HUMAN	-0.282926	-0.486387	Not Interesting
50061	g14529	sp|Q9YHZ6|CDC45_XENLA	0.663659	0.374843	Not Interesting
50074	g14533	NA	-1.58597	-1.39792	Not Interesting
50102	g14540	sp|P70684|PGDH_CAVPO	0.785385	0.263962	Not Interesting
50133	g14550	sp|O14578|CTRO_HUMAN	-0.605728	-0.833807	Not Interesting
50145	g14552	sp|Q4V842|GPTC4_XENLA	-0.201406	-0.397749	Not Interesting
50148	g14554	sp|Q5R9D1|GATL3_PONAB	0.646493	0.200938	Not Interesting
50180	g1226	NA	-0.0402852	1.37272	Not Interesting
50181	g1226	NA	-0.642219	0.794865	Head
50213	g1232	sp|D3YXG0|HMCN1_MOUSE	-0.524757	-0.372184	Not Interesting
50214	g1232	sp|D3YXG0|HMCN1_MOUSE	-0.88453	-0.788354	Not Interesting
50374	g12136	NA	-0.476287	-0.694486	Not Interesting
50385	g12137	sp|Q5F480|ITPK1_CHICK	0.0849964	0.609217	Not Interesting
50393	g12139	NA	0.0699294	0.612083	Not Interesting
50402	g12139	NA	-0.300876	-0.701755	Not Interesting
50448	g12158	sp|P54394|DING_BACSU	-0.122653	0.733096	Not Interesting
50490	g30144	NA	-0.798503	-0.564359	Not Interesting
50541	g21746	NA	0.758765	0.523611	Not Interesting
50547	NA	NA	-0.952878	-0.101174	Not Interesting
50567	g5429	sp|G3V9H8|RET_RAT	-0.627002	-0.843638	Not Interesting
50596	g5441	sp|P35546|RET_MOUSE	-0.715805	-0.365322	Not Interesting
50641	g5455	NA	-0.0914557	1.22423	Not Interesting
50644	g5455	NA	-1.54974	0.623615	Head
50645	g5455	NA	-0.112061	0.444542	Not Interesting
50708	g5483	sp|Q9GNN8|CTXA_CARAL	-0.103856	-0.608006	Not Interesting
5080	g27504	NA	-0.442145	-0.697223	Not Interesting
50824	g5297	sp|D3ZHA0|FLNC_RAT	0.856504	0.26658	Not Interesting
50863	g5312	sp|Q9H2G9|GO45_HUMAN	0.413775	0.277825	Not Interesting
50873	g5321	NA	0.0216149	-0.594432	Not Interesting
50925	g5349	sp|P15513|MYOM1_APLCA	-0.238658	-0.635567	Not Interesting
50979	g5380	sp|Q9IA79|BI1_PAROL	-0.560711	-0.803873	Not Interesting
50991	g30321	NA	0.232656	1.00737	Not Interesting
51054	g15647	NA	0.700456	0.861472	Not Interesting
51128	g15674	sp|Q9Y5X5|NPFF2_HUMAN	-0.139106	-0.507822	Not Interesting
51140	g15676	sp|Q9QY94|GLNA_ACOCA	-0.871268	-1.02837	Not Interesting
51155	g15679	NA	0.369029	1.3317	Not Interesting
51205	g15698	sp|Q5RCI4|CCD47_PONAB	-0.302613	1.50759	Head
51262	g26777	sp|Q8BH86|CN159_MOUSE	-0.582792	-0.809316	Not Interesting
51320	g18068	NA	-0.0815693	-0.391939	Not Interesting
51380	g12077	sp|Q5T4S7|UBR4_HUMAN	1.54961	1.38808	Not Interesting
51382	g12077	sp|Q5T4S7|UBR4_HUMAN	0.586769	0.746504	Not Interesting
51387	g12079	NA	0.527291	0.782764	Not Interesting
51399	g12085	sp|A8Y1P7|BRE4_CAEBR	-0.510018	-0.592424	Not Interesting
51453	g12098	sp|Q05910|ADAM8_MOUSE	0.417761	0.60538	Not Interesting
51461	g12098	sp|Q05910|ADAM8_MOUSE	-0.456561	-0.557705	Not Interesting
51462	g12098	sp|Q05910|ADAM8_MOUSE	-0.0784719	-0.919704	Not Interesting
51560	g25264	sp|P78325|ADAM8_HUMAN	-0.45227	-0.911361	Not Interesting
51575	g25269	NA	-0.466439	-0.69876	Not Interesting
51599	g25277	NA	-0.352769	0.779798	Head
51630	g25284	sp|Q3UZD5|PRDM6_MOUSE	-0.719326	-0.276379	Not Interesting
51648	g25291	NA	-1.09249	-0.846618	Not Interesting
51697	g6855	NA	-0.642009	-0.309268	Not Interesting
51783	g6880	sp|P53773|DLL1_XENLA	-0.558582	0.211189	Head
51786	g6880	sp|P53773|DLL1_XENLA	-0.0145129	0.660468	Not Interesting
51830	g1212	NA	-0.331612	-0.499437	Not Interesting
51841	g1212	NA	-0.786599	-0.421845	Not Interesting
51847	NA	NA	-0.439537	-0.409177	Not Interesting
51873	g19469	sp|O54774|AP3D1_MOUSE	-0.573064	-0.578033	Not Interesting
51877	g19470	sp|Q91584|ELAV3_XENLA	-0.86948	-1.16271	Not Interesting
51878	g19470	sp|Q91584|ELAV3_XENLA	-0.457201	-0.522098	Not Interesting
51930	g26604	sp|Q8N328|PGBD3_HUMAN	-0.357635	-0.412851	Not Interesting
51986	g26621	sp|Q9GT45|RS26_ANOGA	0.479377	0.146777	Not Interesting
52022	NA	NA	-0.341311	-0.830742	Not Interesting
52077	g3731	sp|O75386|TULP3_HUMAN	-0.574898	-0.934826	Not Interesting
52091	g3739	sp|P11277|SPTB1_HUMAN	0.779905	0.292688	Not Interesting
52095	g3739	sp|P11277|SPTB1_HUMAN	0.599358	0.557326	Not Interesting
52112	g3741	NA	0.248729	0.560634	Not Interesting
52149	g3755	sp|P61315|G3ST3_MOUSE	-0.103896	-0.561991	Not Interesting
52154	g3756	sp|Q5RDQ3|AMERL_PONAB	0.520725	0.615268	Not Interesting
52155	g3756	sp|Q5RDQ3|AMERL_PONAB	1.21451	0.921771	Not Interesting
52177	g3761	NA	-1.09807	0.0464385	Head
52188	g3763	sp|Q58A42|DD3_DICDI	-1.17099	-1.2463	Not Interesting
52189	g3763	sp|Q58A42|DD3_DICDI	-0.644646	-0.728449	Not Interesting
52194	g3763	sp|Q58A42|DD3_DICDI	-0.8739	-0.55214	Not Interesting
52208	g3773	sp|Q58A42|DD3_DICDI	-0.649456	-0.313652	Not Interesting
52209	g3774	sp|Q58A42|DD3_DICDI	-0.735842	-0.625619	Not Interesting
52217	g3774	sp|Q58A42|DD3_DICDI	0.130415	0.592893	Not Interesting
52310	g25843	sp|Q9NQW5|PRDM7_HUMAN	-0.654342	-0.849563	Not Interesting
52319	g25844	NA	-0.382542	-0.177821	Not Interesting
52370	g25854	sp|Q9H1Y3|OPN3_HUMAN	-0.959982	-1.33186	Not Interesting
52376	g25854	sp|Q9H1Y3|OPN3_HUMAN	-0.0481871	-0.687298	Not Interesting
5247	g7301	NA	0.679493	0.810262	Not Interesting
52476	g25881	NA	-0.63872	-0.073837	Head
52477	g25881	NA	-0.550501	-0.406691	Not Interesting
52482	g25882	NA	0.685038	1.42278	Not Interesting
52552	g25905	sp|Q75N90|FBN3_HUMAN	-0.036886	0.521114	Not Interesting
52553	g25905	sp|Q75N90|FBN3_HUMAN	0.23061	1.10832	Head
52562	g25906	sp|O95263|PDE8B_HUMAN	-0.377234	-0.751237	Not Interesting
52589	g25911	sp|Q6AZB8|HARB1_DANRE	0.641175	2.00724	Not Interesting
[truncated: 2,198 more rows]

## Sheet: Fig. 1G
Gene ID	Swissprot Annotation	Foot Reg logFC	Head Reg logFC	Structural Enrichment
g10002	sp|Q9H611|PIF1_HUMAN	-0.349369	-0.91372	Not Interesting
g10022	sp|Q91W67|UBL7_MOUSE	0.355405	0.360488	Not Interesting
g10028	NA	-1.399	-1.11606	Not Interesting
g10031	NA	-1.67218	-0.519213	Not Interesting
g10034	sp|P08419|CEL2A_PIG	0.62701	0.863958	Not Interesting
g1004	sp|Q0II91|DJC21_BOVIN	-0.294639	-0.571882	Not Interesting
g10040	sp|Q9NYQ6|CELR1_HUMAN	-0.803336	-0.0708855	Not Interesting
g10045	sp|P61765|STXB1_RAT	0.580472	0.766788	Not Interesting
g10047	sp|Q9UUC1|RL21A_SCHPO	0.747616	0.767911	Not Interesting
g10056	sp|P0CJ14|VP302_LYCMC	6.96635	7.04112	Not Interesting
g10066	sp|Q95135|EAA3_BOVIN	0.998277	1.05821	Not Interesting
g10068	sp|Q8LGG8|USPAL_ARATH	0.847188	0.477095	Not Interesting
g1007	sp|Q09328|MGT5A_HUMAN	0.350465	0.45969	Not Interesting
g10077	sp|Q96MF2|STAC3_HUMAN	-0.445915	-0.534283	Not Interesting
g10086	NA	1.03765	0.898721	Not Interesting
g10088	sp|Q9HAV4|XPO5_HUMAN	-0.811646	-1.1452	Not Interesting
g10089	sp|Q924C1|XPO5_MOUSE	-0.831027	-1.1223	Not Interesting
g1011	sp|Q8IYS1|P20D2_HUMAN	0.614917	0.30932	Not Interesting
g10117	NA	0.360998	0.469368	Not Interesting
g1012	sp|A3KG59|P20D2_MOUSE	0.453969	0.724356	Not Interesting
g10121	sp|Q8IS44|DRD2L_DROME	-0.678442	-0.206208	Not Interesting
g10124	sp|P29540|T2EB_XENLA	0.744899	0.717991	Not Interesting
g1013	sp|Q501L1|P20D2_XENTR	0.514695	0.536251	Not Interesting
g10131	sp|Q9CY57|CHTOP_MOUSE	0.751787	0.726749	Not Interesting
g10133	sp|Q9VB25|KL98A_DROME	-0.31602	-1.35642	Not Interesting
g10134	NA	-0.722194	-1.31943	Not Interesting
g1014	sp|P85107|TGS1_RAT	0.833894	0.376736	Not Interesting
g10140	sp|Q6TCH4|PAQR6_HUMAN	-0.807736	-0.487436	Not Interesting
g10145	sp|Q96CM3|RUSD4_HUMAN	0.898195	0.930596	Not Interesting
g1015	sp|A3KG59|P20D2_MOUSE	1.06095	0.92615	Not Interesting
g10162	sp|Q9JLI7|SPAG6_MOUSE	0.315374	0.563559	Not Interesting
g10165	sp|P30754|CAFF_RIFPA	1.32165	1.38338	Not Interesting
g10166	sp|B8V7R6|COA_ACRMI	1.08392	1.19014	Not Interesting
g10170	sp|Q4V7W3|HEXIM_XENLA	0.932167	0.644193	Not Interesting
g102	sp|P97765|WBP2_MOUSE	0.8299	0.964798	Not Interesting
g10207	NA	1.78311	2.09518	Not Interesting
g10209	sp|Q804X9|OPN4A_GADMO	-0.106525	1.59841	Not Interesting
g10210	sp|Q2KJ97|NCDN_BOVIN	-0.475477	-0.723616	Not Interesting
g10216	NA	-3.62687	-2.61855	Not Interesting
g10221	sp|Q9H270|VPS11_HUMAN	-0.919852	-0.89275	Not Interesting
g10230	sp|Q9Y493|ZAN_HUMAN	-1.75492	-2.3898	Not Interesting
g10231	NA	-2.54039	-2.90853	Not Interesting
g10232	NA	-3.07091	-3.48713	Not Interesting
g10244	sp|Q14766|LTBP1_HUMAN	-1.21003	-0.854194	Not Interesting
g10249	sp|Q96WV6|YHU2_SCHPO	0.457545	0.766228	Not Interesting
g1025	NA	-0.686698	-0.959043	Not Interesting
g10253	sp|Q99MW1|STK31_MOUSE	-0.720574	-1.29618	Not Interesting
g10255	sp|Q80T41|GABR2_MOUSE	-0.819352	-1.16147	Not Interesting
g10262	sp|P56101|DNJC5_TETCF	0.651904	0.829526	Not Interesting
g10288	sp|Q5SVZ6|ZMYM1_HUMAN	-1.68698	-1.25797	Not Interesting
g10289	sp|P42669|PURA_MOUSE	0.623766	0.816714	Not Interesting
g10292	sp|Q64487|PTPRD_MOUSE	-0.674918	-0.873214	Not Interesting
g10300	sp|Q76KP1|B4GN4_HUMAN	1.64727	2.54153	Not Interesting
g10301	sp|Q8VHC8|MA2B1_CAVPO	0.293229	0.377086	Not Interesting
g10304	NA	-1.08512	-1.49243	Not Interesting
g10305	sp|Q9D7A8|ARMC1_MOUSE	0.469869	0.496609	Not Interesting
g10306	NA	1.25556	2.44414	Not Interesting
g10312	NA	-0.552448	-0.361701	Not Interesting
g10316	sp|P61222|ABCE1_MOUSE	0.482998	0.571267	Not Interesting
g10324	sp|Q8BG95|MYPT2_MOUSE	0.420889	0.419027	Not Interesting
g10325	NA	0.753015	0.730666	Not Interesting
g10327	sp|P21675|TAF1_HUMAN	-0.37054	-0.805692	Not Interesting
g10329	sp|Q8IZX4|TAF1L_HUMAN	-0.279977	-1.10118	Not Interesting
g10330	sp|Q58DN4|PPME1_BOVIN	0.305248	0.504352	Not Interesting
g10336	sp|Q6DRF9|WDR55_DANRE	0.645097	0.485447	Not Interesting
g10338	sp|A2AVA0|SVEP1_MOUSE	0.566492	0.56799	Not Interesting
g10345	sp|Q6MG82|PRRT1_RAT	0.453697	0.607996	Not Interesting
g10348	NA	-2.56582	-3.12531	Not Interesting
g10349	NA	-3.86083	-6.18347	Not Interesting
g10357	sp|Q9U3I4|EMRE_CAEEL	-1.6079	-1.1795	Not Interesting
g1036	NA	-1.65086	-1.93943	Not Interesting
g10361	NA	0.385039	0.320953	Not Interesting
g10362	NA	-3.5187	-4.09142	Not Interesting
g10363	sp|Q1D823|AGLZ_MYXXD	-1.6435	-2.67426	Not Interesting
g10364	NA	-2.16479	-2.55271	Not Interesting
g10365	sp|Q5R573|RBL2A_PONAB	0.301328	0.49548	Not Interesting
g1037	NA	-3.0601	-3.2507	Not Interesting
g10380	sp|P49919|CDN1C_MOUSE	0.458743	0.489394	Not Interesting
g1040	NA	-0.364011	-1.66226	Not Interesting
g1041	NA	-2.27982	-2.30899	Not Interesting
g10410	sp|Q4H4B6|SCRIB_DANRE	-0.371531	-0.65522	Not Interesting
g1042	NA	-3.11956	-2.33257	Not Interesting
g10420	sp|Q14160|SCRIB_HUMAN	-0.413696	-0.803353	Not Interesting
g10428	NA	-1.21288	-1.58911	Not Interesting
g10437	sp|G3V9H8|RET_RAT	-0.387124	-0.487858	Not Interesting
g10440	sp|G3V9H8|RET_RAT	-0.296988	-0.859785	Not Interesting
g10458	sp|Q18775|DOPR4_CAEEL	3.63518	0.578982	Not Interesting
g1046	NA	-2.53237	-1.43959	Not Interesting
g10475	NA	-1.25168	-0.572604	Not Interesting
g10482	sp|Q62829|PAK3_RAT	0.588027	0.676252	Not Interesting
g10485	NA	0.917599	0.679191	Not Interesting
g10494	sp|A7RWC9|ITPA_NEMVE	0.48018	0.643202	Not Interesting
g10499	NA	-0.637101	-0.61266	Not Interesting
g1050	NA	-0.551872	-1.31708	Not Interesting
g10512	sp|P54145|AMT1_CAEEL	0.854306	1.12832	Not Interesting
g10513	sp|Q9DB27|MCTS1_MOUSE	0.728513	0.87005	Not Interesting
g10515	sp|Q28DE6|RSBNL_XENTR	0.0240049	0.461608	Not Interesting
g10516	sp|Q4FZV0|MANBA_RAT	-0.379875	-0.52687	Not Interesting
g10517	sp|P55115|NAS15_CAEEL	0.901629	0.635417	Not Interesting
g10519	sp|Q7Z3G6|PRIC2_HUMAN	1.00837	1.34615	Not Interesting
g10527	sp|Q9CSH3|RRP44_MOUSE	-0.389326	-0.569559	Not Interesting
g10529	NA	-1.25245	-1.8652	Not Interesting
g10535	sp|Q9WVG9|MS3L1_MOUSE	-0.514801	-0.707727	Not Interesting
g10536	sp|Q08874|MITF_MOUSE	-0.569834	-0.737594	Not Interesting
g10540	sp|Q0Z8U2|RS3_PIG	0.651111	0.734765	Not Interesting
g10543	sp|P62907|RL10A_RAT	0.469563	0.444448	Not Interesting
g10565	sp|Q9WVM4|ICMT_RAT	0.810472	0.963744	Not Interesting
g10569	NA	-0.501998	-1.01901	Not Interesting
g10572	NA	-2.87459	-4.26681	Not Interesting
g10581	sp|P02264|H2A_ONCMY	2.43693	2.55867	Not Interesting
g10585	sp|Q8IZJ1|UNC5B_HUMAN	1.39791	2.10014	Not Interesting
g10591	sp|Q499N2|AP5M1_RAT	-0.631936	-0.392107	Not Interesting
g10592	sp|Q5ZI51|ARHL2_CHICK	0.494359	0.403057	Not Interesting
g10594	sp|O35426|XBP1_MOUSE	0.782716	0.843977	Not Interesting
g10598	sp|P09760|FER_RAT	-0.118877	-0.560052	Not Interesting
g10605	sp|P35072|TCB1_CAEBR	-0.949883	-0.720416	Not Interesting
g10616	sp|Q80U35|ARHGH_MOUSE	-0.646309	-1.2738	Not Interesting
g10622	sp|Q766D5|B4GN4_MOUSE	0.65952	0.384048	Not Interesting
g10645	sp|Q6DIN3|MBTD1_XENTR	0.105552	0.398429	Not Interesting
g10648	sp|Q5R7P4|BGAL_PONAB	-0.0427974	0.81023	Not Interesting
g10649	sp|Q9VJ79|PDE11_DROME	-0.491356	-0.282045	Not Interesting
g10650	sp|Q7LL04|YQK1_SCHPO	0.75862	1.38905	Not Interesting
g10677	sp|Q8VIG3|RSPH1_MOUSE	-0.949447	-0.512929	Not Interesting
g10678	sp|O35594|IFT81_MOUSE	-0.57994	-0.645969	Not Interesting
g10680	sp|H2A0N9|KCP4_PINMG	3.29926	4.95701	Head
g10687	sp|Q3SZB4|ACADM_BOVIN	0.52796	0.699181	Not Interesting
g10690	sp|Q91ZQ0|VMP1_RAT	0.592458	0.802908	Not Interesting
g10696	sp|Q5ZLD7|VPS53_CHICK	-0.291465	-0.487015	Not Interesting
g107	sp|P97765|WBP2_MOUSE	0.504239	0.769728	Not Interesting
g10705	sp|Q99PV0|PRP8_MOUSE	-0.206471	-0.541508	Not Interesting
g10706	sp|P0CP96|FKBP2_CRYNJ	-0.447944	-0.394337	Not Interesting
g10709	NA	0.564309	0.320904	Not Interesting
g10710	sp|Q9TVC1|VATH_PIG	0.34496	0.480903	Not Interesting
g10711	NA	-0.901076	-1.28696	Not Interesting
g10713	sp|Q7T0Y4|DRC1_XENLA	-0.57714	-1.12999	Not Interesting
g10721	NA	1.29625	1.13959	Not Interesting
g10722	sp|P78316|NOP14_HUMAN	-0.853081	-1.54183	Not Interesting
g10725	sp|Q2HJ10|ZNT2_MOUSE	0.364123	0.456535	Not Interesting
g10736	sp|P57709|AT2C1_BOVIN	0.268573	0.681143	Not Interesting
g10737	sp|D4AK17|PLCX1_ARTBC	0.876217	1.13754	Not Interesting
g10738	sp|O93477|SAHHB_XENLA	0.456323	0.674847	Not Interesting
g10739	sp|O75506|HSBP1_HUMAN	1.30798	0.941989	Not Interesting
g1074	sp|Q9Y6X9|MORC2_HUMAN	-0.61555	-0.45917	Not Interesting
g10740	sp|P41154|HSF_XENLA	-0.422624	-0.583245	Not Interesting
g10742	NA	-1.09298	-0.643579	Not Interesting
g10750	sp|P61315|G3ST3_MOUSE	-0.941306	-0.697244	Not Interesting
g10774	sp|Q9BT88|SYT11_HUMAN	-0.610299	-0.620799	Not Interesting
g1078	sp|F4HRJ4|M3K3A_ARATH	-0.968925	-0.949555	Not Interesting
g10788	sp|O60229|KALRN_HUMAN	-2.34925	-3.10184	Not Interesting
g10789	sp|Q8WZ42|TITIN_HUMAN	-2.65315	-3.80936	Not Interesting
g10790	sp|O02827|MYLK_SHEEP	-1.73605	-2.93493	Not Interesting
g10792	sp|Q3UM45|PP1R7_MOUSE	-0.326735	-0.658095	Not Interesting
g10794	sp|Q78RX3|SIM12_MOUSE	0.938664	0.648385	Not Interesting
g10797	NA	1.64895	2.141	Not Interesting
g10804	sp|Q19980|GCH1_CAEEL	-0.788201	-1.7306	Not Interesting
g10810	sp|Q8N8R7|AL14E_HUMAN	0.452508	0.570381	Not Interesting
g10817	sp|Q26627|SUREJ_STRPU	-1.45927	-0.546717	Not Interesting
g10818	sp|Q7TN88|PK1L2_MOUSE	-1.06469	-0.113401	Not Interesting
g10819	sp|H2LRU7|PKD2_ORYLA	-1.00301	-0.040737	Not Interesting
g10821	NA	-0.868675	-0.895202	Not Interesting
g10822	NA	-1.0429	-1.23232	Not Interesting
g10823	sp|Q7TN88|PK1L2_MOUSE	-1.01944	-0.942741	Not Interesting
g10827	sp|Q7Z442|PK1L2_HUMAN	-0.795009	-0.582944	Not Interesting
g1084	sp|P28021|CSK2B_XENLA	0.558511	0.710619	Not Interesting
g10840	NA	-5.49027	-2.81421	Not Interesting
g10850	NA	0.158293	-1.21081	Not Interesting
g10852	sp|Q9NRR4|RNC_HUMAN	-0.633489	-0.793334	Not Interesting
g10853	sp|Q5HZJ0|RNC_MOUSE	-1.10474	-1.4027	Not Interesting
g10854	sp|Q4QQY7|TGT_XENLA	0.602818	0.691606	Not Interesting
g1086	sp|Q640L5|CCD18_MOUSE	-1.1698	-1.69208	Not Interesting
g10862	NA	0.676235	3.99133	Not Interesting
g10863	NA	0.943458	2.48425	Not Interesting
g10867	sp|A0A0R4I9Y1|R213B_DANRE	-1.97665	-3.10206	Not Interesting
g10878	sp|Q4UMH6|Y381_RICFE	-1.31081	-1.22263	Not Interesting
g10887	sp|Q9Z336|DYLT1_RAT	-1.13113	-0.660517	Not Interesting
g10912	sp|A7SLW1|BCAT_NEMVE	0.209061	0.499683	Not Interesting
g10915	sp|P24288|BCAT1_MOUSE	0.568476	0.743441	Not Interesting
g10925	NA	-1.11423	-1.11684	Not Interesting
g10926	NA	-3.91005	-2.03514	Not Interesting
g1093	sp|Q9XSJ0|UCHL5_BOVIN	0.397738	0.607997	Not Interesting
g10931	sp|P29027|CHI2_RHIOL	-1.45195	-1.7783	Not Interesting
g10932	sp|P29061|CHIB_TOBAC	-1.65234	-2.67127	Not Interesting
g10933	sp|Q9Y2H1|ST38L_HUMAN	0.714084	0.974491	Not Interesting
g10950	NA	0.548048	2.26203	Head
g10953	sp|Q66KV4|BAFB_XENLA	0.750581	0.424833	Not Interesting
g10955	sp|B3EWZ3|CADN_ACRMI	0.861504	1.26327	Not Interesting
g1096	sp|Q63429|UBC_RAT	0.849801	0.96496	Not Interesting
g10961	sp|Q9CYL5|GAPR1_MOUSE	3.92278	3.69413	Not Interesting
g10962	NA	-2.18058	-0.978406	Not Interesting
g10965	sp|Q5HZM1|EIF1A_XENLA	-0.43201	-0.643323	Not Interesting
g10967	NA	1.5243	2.26445	Not Interesting
g1097	NA	6.09779	8.33284	Not Interesting
g10974	sp|Q7M6Z4|KIF27_MOUSE	-0.504372	-0.966533	Not Interesting
g10986	NA	0.680283	1.41609	Head
g10995	sp|D2IYS2|TORSO_BOMMO	-0.751327	-0.56476	Not Interesting
g11008	sp|Q3ULD5|MCCB_MOUSE	0.64955	0.688582	Not Interesting
g11020	sp|Q99PD4|ARC1A_RAT	0.569746	0.694571	Not Interesting
g11021	sp|O76075|DFFB_HUMAN	1.06689	1.10273	Not Interesting
g11024	NA	0.541444	0.284245	Not Interesting
g11030	NA	-0.349547	-0.675073	Not Interesting
g11039	NA	-2.66707	-2.15841	Not Interesting
g11040	sp|Q5R8I6|TBC23_PONAB	0.371011	0.658236	Not Interesting
g11041	sp|Q6PBU5|GRT1A_DANRE	-0.405693	-0.592343	Not Interesting
g11045	sp|Q80TQ2|CYLD_MOUSE	-0.30322	-0.834678	Not Interesting
g11056	NA	0.658319	0.562305	Not Interesting
g11058	sp|C4R7Z3|C9MT_KOMPG	0.422646	0.382054	Not Interesting
g11061	NA	-1.49153	-2.29361	Not Interesting
g11062	sp|Q9H4G4|GAPR1_HUMAN	0.776781	1.00509	Not Interesting
g11070	sp|Q5TCZ1|SPD2A_HUMAN	0.765425	0.330102	Not Interesting
g11093	sp|Q9QWY8|ASAP1_MOUSE	-0.372369	-0.696817	Not Interesting
g11095	sp|P97494|GSH1_MOUSE	-0.160242	-0.435877	Not Interesting
g11119	NA	-0.992314	-1.52562	Not Interesting
g11131	sp|Q03380|COMI_DICDI	-1.42339	-0.795236	Not Interesting
g11132	sp|Q03380|COMI_DICDI	-0.881865	-2.81026	Not Interesting
g11134	NA	1.85297	1.8815	Not Interesting
g11137	sp|Q17RP2|TIGD6_HUMAN	0.839049	0.144431	Not Interesting
g11138	sp|Q24352|GBRAL_DROME	-0.528093	-0.92125	Not Interesting
g11147	sp|P69141|H2A_STRPU	1.89556	2.13421	Not Interesting
g11153	sp|O77503|AGO2_RABIT	-1.38935	-0.450797	Not Interesting
g11156	sp|Q32P51|RA1L2_HUMAN	0.368998	0.462778	Not Interesting
g11157	sp|Q5XJS5|THOC6_DANRE	0.219414	0.490551	Not Interesting
g11167	NA	0.393305	1.14258	Not Interesting
g11168	sp|A4IF69|NHLC2_BOVIN	0.585839	0.818985	Not Interesting
g1117	NA	-1.11564	-1.04372	Not Interesting
g11175	NA	-1.97166	-2.35684	Not Interesting
g11187	NA	-2.16419	-2.3955	Not Interesting
g1119	NA	-0.923069	-1.18813	Not Interesting
g11197	NA	-0.928395	-1.49002	Not Interesting
g11199	sp|Q9ESV0|DDX24_MOUSE	-0.879404	-1.53585	Not Interesting
g112	sp|Q24488|ROR1_DROME	0.361913	0.638796	Not Interesting
g11203	sp|Q5RDL2|DDX24_PONAB	-0.519764	-0.837287	Not Interesting
g11204	sp|Q54TR1|CFAD_DICDI	-0.699505	-0.760651	Not Interesting
g11206	sp|Q552M5|GEFY_DICDI	-0.182882	-0.580499	Not Interesting
g11210	sp|Q14DH7|ACSS3_MOUSE	0.193773	0.425954	Not Interesting
g11214	NA	-1.93943	-1.59365	Not Interesting
g11220	sp|Q91XA9|CHIA_MOUSE	0.60924	0.667272	Not Interesting
g11221	sp|Q13231|CHIT1_HUMAN	0.742629	0.817011	Not Interesting
g11224	NA	-0.838248	-1.42747	Not Interesting
g11226	sp|U3JAG9|CP131_DANRE	-1.76288	-2.05734	Not Interesting
g11230	sp|P21328|RTJK_DROME	-0.470106	-1.06753	Not Interesting
g1125	sp|Q00G26|PLIN5_HUMAN	0.375006	0.765785	Not Interesting
g11261	NA	-1.49275	-1.98761	Not Interesting
g11268	sp|Q9NTI2|AT8A2_HUMAN	-1.04114	-0.991087	Not Interesting
g11269	sp|Q6NYV5|SP30L_DANRE	0.577293	0.800964	Not Interesting
g11271	sp|Q502W6|VWA3B_HUMAN	-0.624884	-1.77356	Not Interesting
g11272	NA	-1.16909	-1.87359	Not Interesting
g11275	sp|P62329|TYB4_RAT	-2.56762	-1.68145	Not Interesting
g11277	sp|Q8WXW3|PIBF1_HUMAN	-0.672096	-1.39549	Not Interesting
g11284	sp|Q8WXW3|PIBF1_HUMAN	-0.747224	-1.62669	Not Interesting
g11287	sp|O88809|DCX_MOUSE	-0.75872	-0.984461	Not Interesting
g11295	sp|Q99999|G3ST1_HUMAN	-0.357066	-0.992595	Not Interesting
g11298	sp|P40826|UBP14_RABIT	0.482381	0.352139	Not Interesting
g11299	sp|Q06831|SOX4_MOUSE	0.447913	0.839956	Not Interesting
g11300	sp|B4LVU6|PDE6_DROVI	-1.12729	-1.10223	Not Interesting
g11305	sp|P57721|PCBP3_HUMAN	0.484979	0.686166	Not Interesting
g11309	sp|Q91628|ORC2_XENLA	-0.432128	-0.687134	Not Interesting
g11313	NA	1.25318	1.22205	Not Interesting
g11314	NA	1.45917	1.3208	Not Interesting
g1132	NA	0.638195	0.114878	Not Interesting
g11330	sp|Q9KWN0|AHV_ACTSK	0.751971	1.08386	Not Interesting
g11334	NA	-0.909755	-1.47226	Not Interesting
g11343	NA	-0.897138	-1.16827	Not Interesting
g11351	sp|Q7SIB2|CO4A1_BOVIN	1.65219	2.11992	Not Interesting
g11352	sp|P08120|CO4A1_DROME	2.05186	2.41626	Not Interesting
g11353	sp|Q4ZJM7|OTOL1_MOUSE	1.88833	2.35395	Not Interesting
g11354	sp|P05099|MATN1_CHICK	1.52084	1.68396	Not Interesting
g11355	sp|P27393|CO4A2_ASCSU	1.87089	2.3283	Not Interesting
g11358	NA	1.1868	0.75081	Not Interesting
g1136	sp|Q8TC12|RDH11_HUMAN	0.270121	0.433772	Not Interesting
g11363	sp|P35520|CBS_HUMAN	1.80748	1.6627	Not Interesting
g11366	sp|P35520|CBS_HUMAN	0.32664	0.449389	Not Interesting
g11369	NA	0.778678	0.500045	Not Interesting
g11370	sp|O95373|IPO7_HUMAN	-7.93748	-4.05752	Not Interesting
g11372	sp|P52486|UBCD4_DROME	0.488222	0.316929	Not Interesting
g11373	sp|Q54CS8|PEX6_DICDI	0.333001	0.41655	Not Interesting
g11391	sp|Q3ZKN0|S27A1_BOVIN	1.05576	0.439335	Not Interesting
g11394	sp|Q9C0J1|B3GN4_HUMAN	0.741815	0.671697	Not Interesting
g11395	sp|Q9R087|GPC6_MOUSE	0.514754	0.823802	Not Interesting
g11397	sp|P79384|PCCB_PIG	0.610905	0.79543	Not Interesting
g11399	sp|Q58D84|FSTL1_BOVIN	0.562484	0.478517	Not Interesting
g1140	sp|G3V9H8|RET_RAT	-0.715176	-0.952893	Not Interesting
g11404	NA	-1.75043	-2.33699	Not Interesting
g11406	sp|P29183|LIPP_HORSE	0.371565	0.511291	Not Interesting
g1141	sp|D2IYS2|TORSO_BOMMO	-1.41595	-1.48184	Not Interesting
g11431	sp|P23468|PTPRD_HUMAN	-0.215125	-0.423341	Not Interesting
g1144	sp|Q9JHU4|DYHC1_MOUSE	-0.566259	-0.861962	Not Interesting
g11440	sp|Q95SX7|RTBS_DROME	-1.53592	-1.62761	Not Interesting
g11441	sp|Q61083|M3K2_MOUSE	-0.424374	-0.631369	Not Interesting
g11444	sp|Q9H7M6|ZSWM4_HUMAN	-1.15797	1.54259	Head
g11446	NA	-1.12502	-1.80612	Not Interesting
g11465	sp|Q5ZKU4|INT2_CHICK	-0.611623	-0.616746	Not Interesting
g11466	sp|P07314|GGT1_RAT	-0.460309	-0.331227	Not Interesting
g11470	sp|Q96LW9|ZSC31_HUMAN	0.651117	2.45059	Head
g11471	sp|P24044|CALM_PLAFA	0.330662	1.26828	Not Interesting
g11474	sp|Q9H1D0|TRPV6_HUMAN	0.510029	0.472134	Not Interesting
g11481	NA	-3.54467	-2.38245	Not Interesting
g11487	NA	-1.11798	-2.22759	Not Interesting
g11501	NA	1.00156	1.19715	Not Interesting
g11515	sp|Q05944|HSP70_HYDVU	-1.07704	-1.02336	Not Interesting
g11517	sp|P97855|G3BP1_MOUSE	0.517066	0.612343	Not Interesting
g11519	sp|A2AVA0|SVEP1_MOUSE	0.442886	0.525491	Not Interesting
g11521	sp|Q149N8|SHPRH_HUMAN	-0.437143	-1.03181	Not Interesting
g11525	sp|Q7TPQ3|SHPRH_MOUSE	-0.683168	-0.831655	Not Interesting
g11527	sp|Q149N8|SHPRH_HUMAN	-0.992297	-1.47301	Not Interesting
g11528	sp|P02466|CO1A2_RAT	1.34376	1.41326	Not Interesting
g11543	sp|Q24799|MYPH_ECHGR	0.338939	0.427111	Not Interesting
g11545	sp|Q60813|ADM1A_MOUSE	-0.100287	-0.724436	Not Interesting
g1155	sp|Q86HQ2|ABCG8_DICDI	-0.480423	-1.6615	Foot
g11559	sp|Q5R4R9|NDUF4_PONAB	0.618013	0.465197	Not Interesting
g11564	sp|Q5XGI5|WDR83_XENTR	0.512382	0.832132	Not Interesting
g11565	sp|P72745|Y1101_SYNY3	-0.772201	-0.700011	Not Interesting
g11566	NA	-0.851926	-0.870411	Not Interesting
g11567	sp|P32780|TF2H1_HUMAN	-0.439495	-0.594299	Not Interesting
g11569	sp|Q2PZL6|FAT4_MOUSE	-1.28048	-2.02367	Not Interesting
g11573	sp|Q6UPE0|CHDH_RAT	0.404802	0.773194	Not Interesting
g11575	sp|Q8BJ64|CHDH_MOUSE	0.720528	0.665677	Not Interesting
g11587	sp|Q86Y56|DAAF5_HUMAN	-1.85856	-0.487876	Not Interesting
g11588	NA	0.146261	-1.68242	Not Interesting
g11589	NA	-0.315623	-0.576747	Not Interesting
g11590	sp|Q5ZKK5|ODFP2_CHICK	-0.191674	-0.974876	Not Interesting
g11591	sp|A0MSJ1|CRA1B_DANRE	0.510271	0.697898	Not Interesting
g11593	sp|Q64739|COBA2_MOUSE	0.741724	0.866164	Not Interesting
g11594	sp|O75884|RBBP9_HUMAN	1.13229	1.16036	Not Interesting
g11603	sp|Q6UPE0|CHDH_RAT	0.45113	0.637723	Not Interesting
g11611	sp|C6KFA3|AGRG6_DANRE	0.295067	0.459837	Not Interesting
g11633	sp|Q96RW7|HMCN1_HUMAN	-0.735716	-0.808015	Not Interesting
g11635	sp|Q13443|ADAM9_HUMAN	-0.531262	-0.881853	Not Interesting
g11636	NA	-0.483793	-1.24503	Not Interesting
g11658	sp|P48727|GLC7B_CAEEL	0.366952	0.441867	Not Interesting
g11659	sp|Q9NQG7|HPS4_HUMAN	-1.08577	-1.35541	Not Interesting
g11673	sp|Q7T0Q5|NOL10_XENLA	-0.293926	-0.476985	Not Interesting
g11680	sp|P50430|ARSB_RAT	0.245998	0.594163	Not Interesting
g11692	sp|Q9JJC6|RIPL1_MOUSE	0.612767	0.570982	Not Interesting
g11693	sp|Q9M0A7|GGP1_ARATH	0.625395	0.876032	Not Interesting
g11696	sp|P39921|TPM1_HYDVU	0.544096	0.455962	Not Interesting
g11697	sp|P55112|NAS4_CAEEL	0.384761	0.545257	Not Interesting
g11698	sp|P55112|NAS4_CAEEL	1.69078	2.71168	Not Interesting
g11699	sp|P70403|CASP_MOUSE	-0.608839	-0.74103	Not Interesting
g11702	sp|Q13948|CASP_HUMAN	-1.57153	-1.43127	Not Interesting
g11703	sp|Q6NW29|RWDD4_HUMAN	-0.648608	-0.633072	Not Interesting
g11708	sp|Q99KR6|RNF34_MOUSE	0.875022	0.390636	Not Interesting
g1171	sp|Q9R1P4|PSA1_MOUSE	0.354627	0.408952	Not Interesting
g11723	sp|Q19269|NAS14_CAEEL	0.964421	1.16742	Not Interesting
g11725	sp|P62997|TRA2B_RAT	0.773136	0.912399	Not Interesting
g11726	sp|Q96KC8|DNJC1_HUMAN	0.486863	0.506504	Not Interesting
g11727	sp|Q61712|DNJC1_MOUSE	-2.07402	-1.83924	Not Interesting
g11728	sp|P49393|RS13_XENLA	0.676994	0.829234	Not Interesting
g11731	sp|Q05722|CO9A1_MOUSE	0.319233	0.764773	Not Interesting
g11732	NA	-5.28063	-5.58956	Not Interesting
g11733	sp|P42297|YXIE_BACSU	1.05973	1.39965	Not Interesting
g11737	sp|E7FDW8|TRD7B_DANRE	-2.03109	-2.07773	Not Interesting
g1174	sp|O15230|LAMA5_HUMAN	-0.566382	-0.72267	Not Interesting
g11740	sp|Q9DE14|ATR_XENLA	-0.435083	-0.805062	Not Interesting
g11745	sp|Q90623|MYPT1_CHICK	-1.30097	0.514917	Head
g11752	NA	-0.795643	-0.733513	Not Interesting
g11755	NA	-0.954064	-1.3544	Not Interesting
g1176	sp|P07942|LAMB1_HUMAN	-0.395194	-0.597248	Not Interesting
g11765	sp|P54366|GSC_DROME	-0.915608	-0.956263	Not Interesting
g11779	sp|Q7ZU45|TTC25_DANRE	-0.624523	-1.15908	Not Interesting
g11780	sp|Q62445|SP4_MOUSE	1.77409	-1.53119	Foot
g11781	sp|Q15750|TAB1_HUMAN	0.389002	0.664079	Not Interesting
g11785	sp|Q8CF89|TAB1_MOUSE	0.665401	0.491659	Not Interesting
g11789	sp|P54922|ADPRH_HUMAN	0.717251	0.716085	Not Interesting
g11792	sp|Q4R5C7|SRP14_MACFA	0.897343	0.911551	Not Interesting
g11794	sp|Q9NBX4|RTXE_DROME	0.412536	0.35771	Not Interesting
g11799	sp|O73606|KCNG2_CHICK	-0.0108053	0.394937	Not Interesting
g11808	sp|Q6GMK6|TSN9_DANRE	-1.27425	-1.16423	Not Interesting
g11829	sp|Q7LKY2|ADDH_SCHPO	0.745699	0.715944	Not Interesting
g11853	sp|Q26636|CATL_SARPE	-1.44188	-2.2358	Not Interesting
g11855	NA	-1.46574	-2.00556	Not Interesting
g11861	sp|Q5ZKN1|CDK9_CHICK	0.600814	0.74943	Not Interesting
g11873	sp|A7S4N4|SERIC_NEMVE	-0.537092	-0.292761	Not Interesting
g11878	NA	-0.977331	-1.28131	Not Interesting
g11880	sp|Q17RW2|COOA1_HUMAN	1.8984	1.72602	Not Interesting
g11886	NA	0.622197	1.15985	Not Interesting
g11897	sp|P48809|RB27C_DROME	0.560469	0.722712	Not Interesting
g11898	sp|P48809|RB27C_DROME	0.675253	0.792765	Not Interesting
g11917	sp|Q5XII5|WAP53_RAT	-0.813797	-1.06244	Not Interesting
g11924	sp|Q60525|WAP53_MESAU	-0.282149	-0.701858	Not Interesting
g11929	sp|Q8WMY2|FPPS_BOVIN	0.896464	0.802631	Not Interesting
g11933	sp|Q9QXX8|NUFP1_MOUSE	-0.274558	-0.499642	Not Interesting
g11940	sp|Q641W3|NUFP1_RAT	-0.466794	-0.330062	Not Interesting
g11941	sp|O15042|SR140_HUMAN	-0.212827	-0.509936	Not Interesting
g11950	sp|Q8CFH6|SIK2_MOUSE	-0.0400078	0.678823	Head
g11952	sp|Q9V3B4|FADD_DROME	-0.639617	-0.529367	Not Interesting
g11956	sp|Q5THJ4|VP13D_HUMAN	-0.991094	-1.54065	Not Interesting
g11970	sp|Q6NUB2|CW15A_XENLA	0.650379	0.577417	Not Interesting
g11974	sp|P12036|NFH_HUMAN	-1.91685	-2.37196	Not Interesting
g11984	sp|Q8R123|FAD1_MOUSE	-0.883593	-1.30084	Not Interesting
g11988	sp|Q54G05|LRRX1_DICDI	-0.690303	-0.962392	Not Interesting
g1199	sp|P42674|BP10_PARLI	1.2447	1.4083	Not Interesting
g11994	NA	1.57582	1.94678	Not Interesting
g11996	sp|A5PN43|TM175_DANRE	0.989536	1.35843	Not Interesting
g12003	sp|Q7TNH6|NPHP3_MOUSE	-1.07015	-2.21128	Not Interesting
g12024	sp|Q4PM12|RL36_IXOSC	1.25676	1.11876	Not Interesting
g12030	sp|Q920M9|SIAH1_RAT	0.253225	0.405622	Not Interesting
g12035	NA	-1.428	-2.11386	Not Interesting
g12037	sp|A7S7F2|BYST_NEMVE	-1.423	-2.45777	Not Interesting
g12038	NA	0.193854	0.428174	Not Interesting
g12039	sp|Q505D9|TRI67_MOUSE	-0.656823	-0.706853	Not Interesting
g12040	NA	0.0968726	1.11468	Not Interesting
g12044	NA	-0.324156	-0.644378	Not Interesting
g12046	sp|Q63150|DPYS_RAT	0.612063	0.492735	Not Interesting
g12048	sp|P62282|RS11_RAT	0.778671	0.624648	Not Interesting
g12057	sp|Q60HC3|HNRPF_MACFA	0.68081	0.804287	Not Interesting
g12058	sp|Q5ZM16|RBM22_CHICK	0.869543	1.13127	Not Interesting
g12059	sp|Q8X034|RL15_NEUCR	0.875738	1.00952	Not Interesting
g12061	sp|Q08DQ2|GFPT2_BOVIN	1.17551	1.58187	Not Interesting
g12069	NA	-0.521809	-0.577596	Not Interesting
g1207	sp|A5PN43|TM175_DANRE	0.473971	0.469468	Not Interesting
g12073	sp|A2AN08|UBR4_MOUSE	-1.50379	-2.12602	Not Interesting
g12074	sp|Q2TL32|UBR4_RAT	-1.32538	-1.98092	Not Interesting
g12075	sp|Q5T4S7|UBR4_HUMAN	-1.59589	-2.12722	Not Interesting
g12076	sp|A2AN08|UBR4_MOUSE	-1.04063	-1.61829	Not Interesting
g1208	sp|A5PN43|TM175_DANRE	0.623428	0.772545	Not Interesting
g12085	sp|A8Y1P7|BRE4_CAEBR	0.620428	1.0899	Not Interesting
g12091	sp|Q96AE4|FUBP1_HUMAN	0.612129	0.821094	Not Interesting
g12094	sp|O18994|GPX5_PIG	0.652741	0.708582	Not Interesting
g12095	sp|Q767L0|ABCF1_PIG	-0.282585	-0.71636	Not Interesting
g12100	sp|P14173|DDC_RAT	0.347601	0.237818	Not Interesting
g12109	NA	0.896216	1.29359	Not Interesting
g12119	sp|Q6NZ07|NCLN_DANRE	-2.19241	-2.42195	Not Interesting
g1212	NA	-1.3563	-1.89521	Not Interesting
g12120	sp|P50280|MMP7_RAT	0.671456	0.708628	Not Interesting
g12126	sp|Q08E00|RASLC_BOVIN	1.17329	1.06491	Not Interesting
g12137	sp|Q5F480|ITPK1_CHICK	0.280749	0.531146	Not Interesting
g12149	sp|P26369|U2AF2_MOUSE	0.618559	0.727373	Not Interesting
g1215	sp|Q8IZD2|KMT2E_HUMAN	-0.59865	-0.906809	Not Interesting
g12151	NA	0.606952	0.93133	Not Interesting
g1216	sp|H9BW96|RAB7_EPICO	0.386636	0.572477	Not Interesting
g12164	sp|Q80SU7|GVIN1_MOUSE	-1.08008	-1.99016	Not Interesting
g12180	sp|P48508|GSH0_RAT	-0.636991	-0.625593	Not Interesting
g12183	sp|Q9D1A2|CNDP2_MOUSE	0.457601	0.493349	Not Interesting
g12187	sp|Q9D1A2|CNDP2_MOUSE	0.593361	0.523944	Not Interesting
g12189	sp|Q8ILR9|YPF17_PLAF7	-1.30368	-2.07689	Not Interesting
g12200	sp|Q4R945|TTK_MACFA	-0.610957	-1.04704	Not Interesting
g12202	sp|A5PK45|GT251_BOVIN	0.314735	0.586594	Not Interesting
g12207	sp|P21328|RTJK_DROME	0.749387	0.141775	Not Interesting
g12208	NA	-0.94865	-1.31884	Not Interesting
g12211	sp|Q9GKR6|CAYP2_MACFA	-0.513048	-0.641194	Not Interesting
g12214	sp|B0V2N1|PTPRS_MOUSE	-0.909402	-0.907662	Not Interesting
g12219	sp|A7RNG8|CCD22_NEMVE	-0.642932	-1.12765	Not Interesting
g12223	sp|D3ZDI6|MYLIP_RAT	-0.355228	0.325092	Head
g12231	sp|P81439|EQST_ACTEQ	-0.737583	-0.945245	Not Interesting
g12236	NA	0.170647	1.1392	Not Interesting
g12239	sp|B3EWZ3|CADN_ACRMI	-0.682061	-0.99951	Not Interesting
g12254	sp|B3EWZ3|CADN_ACRMI	-0.767306	-0.814128	Not Interesting
g12259	sp|Q80ZF8|AGRB3_MOUSE	-1.25719	-1.39559	Not Interesting
g12264	sp|O08585|CLCA_MOUSE	0.777691	0.917908	Not Interesting
g12265	sp|O60469|DSCAM_HUMAN	-1.11051	-1.08389	Not Interesting
g12274	sp|G5ECQ2|FRIZ2_CAEEL	0.509585	3.31463	Head
g12277	sp|Q5SRI9|MANEA_HUMAN	0.520525	0.500456	Not Interesting
g12279	sp|Q6DD38|TRIAB_XENLA	-2.02952	-1.39562	Not Interesting
g12280	sp|Q6TGY8|EMC2_DANRE	0.562471	0.620518	Not Interesting
g12291	sp|Q96RW7|HMCN1_HUMAN	0.650548	0.880678	Not Interesting
g12316	sp|Q5RC80|RBM39_PONAB	0.488546	0.510873	Not Interesting
g12322	sp|P40240|CD9_MOUSE	0.320084	0.55243	Not Interesting
g12323	NA	-0.720442	-0.873186	Not Interesting
g12335	sp|Q26481|RL5_STYCL	0.77261	0.926772	Not Interesting
g12355	NA	-1.48728	-2.49755	Not Interesting
g12369	sp|Q9WUH1|TM115_MOUSE	0.199928	0.424953	Not Interesting
g12370	sp|P53356|HTK16_HYDVU	0.536086	0.940037	Not Interesting
g12371	sp|Q640R7|RAP1B_XENTR	0.62044	-1.30285	Foot
g12396	sp|Q8T5Z4|RS19_BRABE	0.836308	0.912767	Not Interesting
g12399	sp|Q921G8|GCP2_MOUSE	0.541072	0.565595	Not Interesting
g12401	NA	-0.205101	-0.518258	Not Interesting
g12402	sp|Q6DBR4|TIPIN_DANRE	0.77382	0.513157	Not Interesting
g12407	sp|Q17Q91|CHCH7_BOVIN	-1.92752	-1.71029	Not Interesting
g12418	sp|Q5R8J8|DNJB4_PONAB	0.792575	0.785403	Not Interesting
g12419	NA	-1.01531	-1.25908	Not Interesting
g12434	sp|A4GTP4|ELK1_RAT	3.72294	2.79892	Not Interesting
g12439	sp|P41969|ELK1_MOUSE	3.64976	0.640291	Not Interesting
g12440	NA	3.10294	0.928189	Not Interesting
g12447	sp|A4GTP4|ELK1_RAT	0.747459	1.0137	Not Interesting
g12448	sp|O88879|APAF_MOUSE	-0.65237	-0.723434	Not Interesting
g12455	NA	-4.11801	-3.7268	Not Interesting
g12458	sp|P0C548|PLPL2_RAT	0.959182	-0.129205	Not Interesting
g12461	sp|O18405|SURF4_DROME	0.475168	0.495613	Not Interesting
g12462	sp|P08935|CYT_BITAR	1.23181	0.99905	Not Interesting
g12463	NA	-1.96008	-2.68254	Not Interesting
g12464	sp|Q9VBP3|TNKS_DROME	0.124983	1.20088	Not Interesting
g12465	sp|Q1LZB6|CAPR1_BOVIN	0.255003	0.326197	Not Interesting
g12466	sp|P54825|LMIP_RAT	0.818109	0.65654	Not Interesting
g12468	sp|Q5SRE5|NU188_HUMAN	-0.614208	-0.655212	Not Interesting
g12470	NA	-4.17714	-1.66274	Not Interesting
g12471	NA	0.817194	1.13729	Not Interesting
g12478	sp|Q9CYL5|GAPR1_MOUSE	1.61488	0.641264	Not Interesting
g12492	NA	-3.76334	-3.64992	Not Interesting
g12516	sp|Q32P44|EMAL3_HUMAN	-1.05878	-0.932361	Not Interesting
g12517	NA	-0.449631	-0.846402	Not Interesting
g12524	sp|O08795|GLU2B_MOUSE	0.556569	0.604816	Not Interesting
g12526	sp|P14314|GLU2B_HUMAN	0.541613	0.591248	Not Interesting
g1253	NA	3.5753	2.82371	Not Interesting
g12532	sp|Q9UBC2|EP15R_HUMAN	-0.203354	-0.342643	Not Interesting
g12533	sp|Q9WTP7|KAD3_MOUSE	0.614993	0.381244	Not Interesting
g12542	NA	-1.38416	-1.63186	Not Interesting
g12545	sp|Q23571|ODB2_CAEEL	-2.18142	-1.12068	Not Interesting
g12549	sp|Q96MU7|YTDC1_HUMAN	-0.726984	-1.01212	Not Interesting
g12555	sp|Q8CD26|S35E1_MOUSE	-0.303337	-0.585828	Not Interesting
g12560	sp|A1X151|CAZA2_ECHTE	-0.704813	-0.261791	Not Interesting
g12563	sp|Q9W2N0|CAPZA_DROME	0.466531	0.594174	Not Interesting
g12567	sp|P48430|SOX2_CHICK	0.422771	3.19434	Head
g12568	NA	0.193489	0.410183	Not Interesting
g12571	sp|Q17QJ5|TSN5_BOVIN	0.61333	0.621859	Not Interesting
g12573	sp|O35449|PRRT1_MOUSE	0.641144	0.867737	Not Interesting
g12580	sp|Q9CYL5|GAPR1_MOUSE	-2.9165	-3.55219	Not Interesting
g12581	sp|P49588|SYAC_HUMAN	0.254459	0.334854	Not Interesting
g12582	sp|Q9H4G4|GAPR1_HUMAN	-2.7968	-3.31525	Not Interesting
g12583	sp|Q9H4G4|GAPR1_HUMAN	-2.6833	-3.24293	Not Interesting
g12585	sp|A2AVA0|SVEP1_MOUSE	0.458609	0.579123	Not Interesting
g1259	sp|Q14246|AGRE1_HUMAN	-0.874594	-1.63107	Not Interesting
g12591	sp|Q15329|E2F5_HUMAN	0.168522	0.473414	Not Interesting
g12592	NA	-2.34746	-3.2078	Not Interesting
g12598	sp|Q9XGL4|RL31_CYAPA	0.938823	0.923646	Not Interesting
g12601	sp|P27590|UROM_RAT	0.40021	0.399389	Not Interesting
g12603	sp|Q17QJ5|TSN5_BOVIN	0.771272	0.867154	Not Interesting
g12631	sp|Q16960|DYI3_HELCR	0.447877	0.679457	Not Interesting
g12671	sp|Q6TH15|EIF3D_DANRE	0.433844	0.438052	Not Interesting
g12684	sp|Q9SWE5|HAL3A_ARATH	-1.32598	-1.02445	Not Interesting
g12699	sp|Q9W4P5|VA0D1_DROME	0.271396	0.462922	Not Interesting
g12703	sp|Q02290|XYNB_NEOPA	-1.95539	-2.93549	Not Interesting
g12705	sp|Q91YE3|EGLN1_MOUSE	-2.04896	-0.34907	Not Interesting
g12706	sp|Q539E5|APX1_HYDVD	1.66357	1.55197	Not Interesting
g12710	sp|P35283|RAB12_MOUSE	0.928707	2.75105	Head
g12724	sp|Q99323|MYSN_DROME	-0.709293	-1.34804	Not Interesting
g12726	sp|Q5RFK5|GLYC_PONAB	0.416727	0.545045	Not Interesting
g12728	sp|Q6PB04|MEIG1_XENLA	1.22478	1.09941	Not Interesting
g12731	sp|Q8CIS0|CAR11_MOUSE	-0.495803	-1.06472	Not Interesting
g12732	sp|Q8CIS0|CAR11_MOUSE	-0.86484	0.334022	Not Interesting
g12740	sp|Q28HY5|CP072_XENTR	0.369536	0.654757	Not Interesting
g12747	sp|Q9BXL7|CAR11_HUMAN	-0.6794	-1.35202	Not Interesting
g12748	sp|Q9DCR2|AP3S1_MOUSE	0.417232	0.552455	Not Interesting
g12749	sp|Q58EX2|SDK2_HUMAN	0.306076	0.349899	Not Interesting
g1275	sp|P27918|PROP_HUMAN	0.944055	0.768155	Not Interesting
g12756	NA	0.536952	0.834177	Not Interesting
g1276	sp|Q96RW7|HMCN1_HUMAN	1.442	0.993142	Not Interesting
g12768	sp|Q13976|KGP1_HUMAN	0.317048	0.651857	Not Interesting
g12775	sp|P46405|RS12_PIG	0.943027	1.07465	Not Interesting
g12776	sp|Q9Y673|ALG5_HUMAN	0.454176	0.365551	Not Interesting
g12777	sp|Q5HZI1|MTUS1_MOUSE	-0.738517	-1.08361	Not Interesting
g12778	sp|Q9WTV0|PREB_RAT	0.549415	0.587503	Not Interesting
g12783	sp|Q9ULC3|RAB23_HUMAN	1.01477	1.46696	Not Interesting
g12787	sp|P26256|ANX12_HYDVU	0.667608	0.806777	Not Interesting
g12788	sp|P26256|ANX12_HYDVU	0.624479	0.840427	Not Interesting
g12789	sp|Q9Z1Z2|STRAP_MOUSE	0.739362	0.829232	Not Interesting
g1279	NA	0.848859	0.351815	Not Interesting
g12790	sp|Q9NZN8|CNOT2_HUMAN	0.328482	0.314667	Not Interesting
g12795	NA	-0.65392	-1.40858	Not Interesting
g12796	sp|Q9XIJ5|PUB18_ARATH	-0.431731	-1.35092	Not Interesting
g12802	NA	-1.23013	-2.04076	Not Interesting
g12806	sp|A9UMS3|PHB2_XENTR	0.590961	0.572614	Not Interesting
g12814	sp|Q95SX7|RTBS_DROME	-2.98672	-2.70512	Not Interesting
g12815	sp|Q7ZV43|TOLIP_DANRE	0.763286	0.844812	Not Interesting
g12818	NA	-0.56254	-0.45481	Not Interesting
g12822	NA	0.184514	0.699093	Not Interesting
g12830	sp|Q8IY21|DDX60_HUMAN	-0.334922	-0.755583	Not Interesting
g12839	sp|Q19KI0|RHCG_PIG	0.549725	0.621273	Not Interesting
g1284	NA	-0.488283	-0.564583	Not Interesting
g12844	sp|Q5S006|LRRK2_MOUSE	-0.460426	-1.05132	Not Interesting
g12853	sp|P35317|AT1A_HYDVU	-0.464152	-0.565721	Not Interesting
g12860	NA	-1.76563	-2.30399	Not Interesting
g12862	sp|Q3MII6|TBC25_HUMAN	0.514937	0.696727	Not Interesting
g12866	NA	-1.93848	-1.66549	Not Interesting
g12869	sp|Q05209|PTN12_HUMAN	-0.28268	-0.53094	Not Interesting
g12870	sp|Q9Y2R2|PTN22_HUMAN	-0.76575	-0.878699	Not Interesting
g12871	sp|P28685|CNTN2_CHICK	0.3019	0.452732	Not Interesting
g12876	sp|Q9D504|ANKR7_MOUSE	-2.72025	-4.28258	Not Interesting
g12877	NA	-2.29673	-2.75047	Not Interesting
g12878	sp|Q9UPS8|ANR26_HUMAN	-2.47286	-2.81547	Not Interesting
g12881	sp|Q96SK2|TM209_HUMAN	0.180561	0.543234	Not Interesting
g12884	sp|P80513|MANF_BOVIN	0.603198	0.853803	Not Interesting
g12885	sp|P08680|HEM0_MOUSE	0.822616	0.834516	Not Interesting
g12890	sp|Q68CP4|HGNAT_HUMAN	0.549875	0.817895	Not Interesting
g12891	sp|Q4KLJ8|PDCL3_RAT	0.489653	0.445007	Not Interesting
g12892	NA	-2.81454	-3.58047	Not Interesting
g12893	sp|Q63187|ELOA1_RAT	0.328733	0.261386	Not Interesting
g12896	sp|O18738|DAG1_BOVIN	-1.7918	-2.35691	Not Interesting
g12906	sp|Q02556|IRF8_HUMAN	0.273671	0.439072	Not Interesting
g12940	sp|Q7Z494|NPHP3_HUMAN	-0.472986	-2.02863	Not Interesting
g12943	sp|Q7Z494|NPHP3_HUMAN	-0.989844	-2.64162	Not Interesting
g12946	sp|Q8TD57|DYH3_HUMAN	-0.31937	-0.689827	Not Interesting
g12949	sp|Q8NHV1|GIMA7_HUMAN	1.0358	0.885366	Not Interesting
g12961	NA	-0.381292	-0.915877	Not Interesting
g12963	sp|P56213|ALR_MOUSE	0.600817	0.657875	Not Interesting
g12967	sp|Q7Z494|NPHP3_HUMAN	-2.09861	-2.72585	Not Interesting
g12970	sp|A8Z5Z5|SECA_SULMW	-2.18997	-3.0835	Not Interesting
g12971	NA	-0.904405	-1.29202	Not Interesting
g12975	NA	-1.87648	-0.527065	Not Interesting
g12976	NA	0.85897	0.879498	Not Interesting
g12991	sp|O35134|RPA1_MOUSE	-0.33314	-0.722467	Not Interesting
g12992	sp|P69478|CHSTB_RAT	1.31381	2.27474	Not Interesting
g12994	sp|Q8HXM1|CSTF2_BOVIN	0.505227	0.855593	Not Interesting
g12995	sp|Q9H0L4|CSTFT_HUMAN	-0.671176	-0.416177	Not Interesting
g12999	sp|Q95NR9|CALM_METSE	0.412905	0.5481	Not Interesting
g13	sp|Q5TYQ8|ZC3HE_DANRE	-1.60789	-2.24654	Not Interesting
g130	sp|O07051|LTAA_AERJA	0.477435	0.563128	Not Interesting
g13002	sp|P11118|CALM_EUGGR	-1.51908	-0.551815	Not Interesting
g13019	sp|P16273|PRPX_HORVU	1.64449	0.50092	Not Interesting
g1302	NA	0.651523	0.722415	Not Interesting
g13021	NA	-1.19599	-1.74248	Not Interesting
g1304	NA	0.583407	0.57777	Not Interesting
g13048	NA	1.02287	0.874764	Not Interesting
g13058	sp|H6BDU4|SODC_CAMDR	1.39247	1.98343	Not Interesting
g1306	NA	0.940994	0.907653	Not Interesting
g13063	NA	-0.751437	-0.936464	Not Interesting
g13069	NA	1.14972	0.959588	Not Interesting
g13076	NA	-2.1721	-2.48287	Not Interesting
g13103	sp|P35317|AT1A_HYDVU	0.0938703	0.38726	Not Interesting
g13109	NA	0.741302	-0.193238	Not Interesting
g13121	sp|Q9Y2U5|M3K2_HUMAN	-0.810612	-0.527863	Not Interesting
g13123	sp|Q9CAD5|YODA_ARATH	-0.980681	-0.99301	Not Interesting
g13124	sp|Q54R82|MKKA_DICDI	-0.529193	-0.644895	Not Interesting
g13126	NA	0.325759	0.41969	Not Interesting
g13127	sp|P03934|TC1A_CAEEL	-0.575863	-0.630593	Not Interesting
g13138	sp|P34743|BTG1_CHICK	0.0189177	0.410871	Not Interesting
g13140	sp|A7MBP4|IFT46_DANRE	0.419909	0.586113	Not Interesting
g13142	sp|P31400|VATA_MANSE	0.297076	0.436637	Not Interesting
g13144	sp|Q9FVW4|RENT3_ARATH	-0.877305	-1.02692	Not Interesting
g13145	sp|P0CJ14|VP302_LYCMC	0.675088	0.697363	Not Interesting
g13151	sp|Q9U4H5|AMX_DROME	-1.41453	-1.09616	Not Interesting
g13154	sp|Q8BIK4|DOCK9_MOUSE	-0.588047	-1.07705	Not Interesting
g13157	sp|Q9Y4W2|LAS1L_HUMAN	0.678041	0.748843	Not Interesting
g13165	NA	-0.414121	-0.634459	Not Interesting
g13175	NA	-3.05243	-3.8978	Not Interesting
g13179	sp|Q3T1L0|A16A1_RAT	0.309726	0.454414	Not Interesting
g13180	sp|P40047|ALDH5_YEAST	0.478548	0.543327	Not Interesting
g13184	sp|O35474|EDIL3_MOUSE	-0.300647	-0.594312	Not Interesting
g13188	NA	0.44691	0.563095	Not Interesting
g13193	sp|Q99K28|ARFG2_MOUSE	0.553389	0.611893	Not Interesting
g13194	sp|Q5DTZ6|RN150_MOUSE	0.320059	0.465191	Not Interesting
g13199	sp|P19971|TYPH_HUMAN	-0.570146	-1.25652	Not Interesting
g1320	sp|Q8K007|SULF1_MOUSE	-0.622637	-0.00841821	Not Interesting
g1321	NA	-0.615949	-0.525511	Not Interesting
g13212	sp|Q9Y6L7|TLL2_HUMAN	-0.141797	-0.537398	Not Interesting
g13216	NA	-1.65675	-3.08789	Not Interesting
g13218	sp|Q42942|UMPS_TOBAC	0.00520394	0.560607	Not Interesting
g13220	sp|Q9EQS3|MYCBP_MOUSE	-3.08934	-2.19304	Not Interesting
g13222	sp|Q99417|MYCBP_HUMAN	0.751366	0.607339	Not Interesting
g13225	sp|O43172|PRP4_HUMAN	0.58181	0.528105	Not Interesting
g13228	sp|P19222|CBPA2_RAT	0.66025	0.767392	Not Interesting
g13243	sp|Q96N23|CFA54_HUMAN	-0.54542	-1.09405	Not Interesting
g13244	sp|Q96N23|CFA54_HUMAN	-1.15439	-1.07054	Not Interesting
g13247	sp|Q9KWN0|AHV_ACTSK	0.872099	1.89007	Not Interesting
g13250	sp|Q9KWN0|AHV_ACTSK	0.540213	1.60742	Not Interesting
g13272	sp|P18729|ZG57_XENLA	-0.671095	-0.765694	Not Interesting
g13278	sp|Q5RDB5|CNIH1_PONAB	-1.39413	-0.87777	Not Interesting
g13285	sp|Q5ZIF1|APMAP_CHICK	0.514038	0.779134	Not Interesting
g13293	NA	-1.14724	-2.1899	Not Interesting
g13307	sp|P41252|SYIC_HUMAN	0.659668	0.658059	Not Interesting
g13310	sp|Q7TT37|ELP1_MOUSE	-1.90706	-1.67576	Not Interesting
g13315	sp|A0A0R4IBK5|R213A_DANRE	-2.69542	-3.48775	Not Interesting
g13320	sp|A0A0R4IBK5|R213A_DANRE	-1.87049	-1.98336	Not Interesting
g13323	NA	-1.65566	-2.42941	Not Interesting
g13331	sp|A0A0R4IBK5|R213A_DANRE	-1.91212	-1.96154	Not Interesting
g13334	sp|A0A0R4IBK5|R213A_DANRE	-1.39523	-2.01199	Not Interesting
g13365	sp|Q5R6L3|DNLI4_PONAB	-0.436625	-0.579692	Not Interesting
g13370	sp|Q90YB1|DNLI4_CHICK	-0.550437	-1.00381	Not Interesting
g13371	NA	0.317066	0.518353	Not Interesting
g1338	sp|Q9GNN8|CTXA_CARAL	-1.13286	-0.942721	Not Interesting
g13395	NA	-0.726754	-1.43104	Not Interesting
g13396	sp|Q8WVS4|WDR60_HUMAN	-0.914924	-1.28512	Not Interesting
g13418	sp|P15357|RS27A_DROME	1.15751	1.31629	Not Interesting
g13419	NA	-1.37222	-1.39668	Not Interesting
g13421	NA	-0.569537	-0.87286	Not Interesting
g13424	sp|A7S4N4|SERIC_NEMVE	-0.54114	-1.02263	Not Interesting
g13426	sp|Q03701|CEBPZ_HUMAN	-0.447393	-0.904749	Not Interesting
g13432	sp|Q80X82|SYMPK_MOUSE	-1.08413	-0.664507	Not Interesting
g13436	sp|P85120|DAPLE_XENLA	-1.13092	-1.46267	Not Interesting
g13437	NA	0.724888	0.861833	Not Interesting
g13449	NA	0.5964	0.648597	Not Interesting
g13459	sp|B5X8A5|ABRAL_SALSA	0.402535	0.625569	Not Interesting
g1347	NA	-0.360607	-1.30905	Not Interesting
g13470	sp|P54357|MLC2_DROME	0.457891	0.5264	Not Interesting
g13471	sp|Q8W034|RNP1_ARATH	0.151459	0.47336	Not Interesting
g13474	NA	0.737378	1.57191	Not Interesting
g13478	sp|Q8CBH5|MFSD6_MOUSE	-1.07911	-0.677965	Not Interesting
g1348	sp|Q16204|CCDC6_HUMAN	0.383375	0.533042	Not Interesting
g13494	sp|P46822|KLC_CAEEL	-2.39747	-2.40924	Not Interesting
g13495	NA	-2.212	-1.41235	Not Interesting
g135	sp|Q6P0I8|EXOS6_DANRE	0.503234	0.580679	Not Interesting
g13508	sp|Q803I8|SYVN1_DANRE	0.370503	0.449851	Not Interesting
g13509	sp|Q5E951|TBCB_BOVIN	0.712919	0.534137	Not Interesting
g13514	sp|Q9BX10|GTPB2_HUMAN	1.39857	1.47925	Not Interesting
g13516	sp|Q13825|AUHM_HUMAN	0.497937	0.462049	Not Interesting
g13519	sp|Q7M456|RNOY_CRAGI	0.528365	0.66585	Not Interesting
g13520	NA	0.149789	1.2552	Not Interesting
g13521	sp|Q5U4U5|TIM22_XENLA	0.81377	0.840308	Not Interesting
g13529	NA	0.587211	0.865639	Not Interesting
g13532	sp|Q9UPN3|MACF1_HUMAN	-3.22258	-3.45187	Not Interesting
g13533	sp|Q9NXZ2|DDX43_HUMAN	0.386577	0.575208	Not Interesting
g13535	sp|P40954|CHI3_CANAL	0.384604	0.499677	Not Interesting
g13544	sp|O08992|SDCB1_MOUSE	0.921331	1.1634	Not Interesting
g13547	sp|Q174I2|PRIC1_AEDAE	0.486055	0.909631	Not Interesting
g13548	sp|P08251|AT1B1_CHICK	0.323277	0.531605	Not Interesting
g13575	sp|Q8DEL8|SECA_VIBVU	-3.50148	-3.90321	Not Interesting
g13578	NA	-1.10881	-1.02183	Not Interesting
g13587	sp|Q64121|PRLHR_RAT	-1.20717	1.00679	Head
g13591	sp|Q76IC5|PGPI_RAT	0.29659	0.695341	Not Interesting
g13597	sp|Q8IWZ8|SUGP1_HUMAN	0.298616	0.519522	Not Interesting
g13598	NA	1.23616	1.41889	Not Interesting
g136	NA	-1.85053	-1.62662	Not Interesting
g13601	sp|Q8NDA2|HMCN2_HUMAN	-0.346674	-0.86285	Not Interesting
g13602	sp|P13234|KCC4_RAT	0.434108	0.430827	Not Interesting
g13619	NA	2.46405	4.75348	Not Interesting
g1363	sp|Q53H47|SETMR_HUMAN	1.57179	1.78701	Not Interesting
g13653	NA	-0.83255	-0.492642	Not Interesting
g13655	sp|Q8IVV2|LOXH1_HUMAN	-1.7051	-1.09852	Not Interesting
g13657	sp|Q18DN4|HMU_HALWD	-1.13973	-0.273301	Not Interesting
g13659	NA	-1.78816	-1.56414	Not Interesting
g13664	sp|P29506|UNC4_CAEEL	-0.215342	-0.399155	Not Interesting
g13667	sp|Q587J7|TDR12_HUMAN	-0.944062	-1.50201	Not Interesting
g13669	sp|B9W7H9|NOP9_CANDC	-0.208581	-0.452038	Not Interesting
g13670	NA	-3.39241	-2.00217	Not Interesting
g13674	sp|Q86T03|TM55B_HUMAN	0.2707	0.464891	Not Interesting
g13677	NA	-0.73688	-1.03755	Not Interesting
g13678	sp|Q5PQM2|KLC4_RAT	-0.828942	-0.946195	Not Interesting
g13690	sp|Q28DG7|UBAC1_XENTR	0.642626	0.843604	Not Interesting
g13693	NA	-3.06526	-3.81235	Not Interesting
g13697	sp|Q54I82|CDD_DICDI	0.430905	0.65141	Not Interesting
g13698	sp|Q804X9|OPN4A_GADMO	0.900663	-0.311513	Foot
g13720	NA	0.657621	0.520079	Not Interesting
g13722	NA	0.32933	0.448491	Not Interesting
g13730	sp|P42325|NCAH_DROME	0.586523	1.5431	Not Interesting
g13733	sp|Q3SWT4|IWS1_RAT	0.17714	0.471259	Not Interesting
g13741	sp|Q27433|MEC2_CAEEL	0.262429	0.451628	Not Interesting
g13747	NA	-2.2217	-2.53692	Not Interesting
g13748	NA	-2.47179	-2.99165	Not Interesting
g13749	sp|Q8WXH0|SYNE2_HUMAN	-1.69423	-2.21135	Not Interesting
g1375	sp|P23378|GCSP_HUMAN	0.135335	0.42094	Not Interesting
g13750	sp|Q86BE9|PEN2_DROME	-1.26925	-0.351435	Not Interesting
g13757	sp|P91645|CAC1A_DROME	-0.684419	-0.871195	Not Interesting
g13759	sp|Q9UNL2|SSRG_HUMAN	0.446039	0.507423	Not Interesting
g13776	sp|Q6P9Q6|FKB15_MOUSE	-0.246443	-0.531867	Not Interesting
g13791	sp|Q7Z442|PK1L2_HUMAN	-1.07038	-0.751654	Not Interesting
g13800	sp|Q6PH57|GBB1_DANRE	-0.757433	-0.514636	Not Interesting
g13801	sp|Q5UQ60|YL662_MIMIV	2.19036	2.18516	Not Interesting
g13803	sp|Q6ING7|FLAD1_XENLA	0.764672	1.20977	Not Interesting
g13811	sp|Q07864|DPOE1_HUMAN	-0.483389	-0.905635	Not Interesting
g13812	sp|Q07864|DPOE1_HUMAN	-0.691069	-1.02868	Not Interesting
g13813	sp|Q6PZ02|ATG4B_CHICK	0.335883	0.43438	Not Interesting
g13845	sp|P40818|UBP8_HUMAN	-0.219815	-0.642438	Not Interesting
g13846	sp|Q60598|SRC8_MOUSE	0.945496	0.90366	Not Interesting
g13857	sp|H2LRU7|PKD2_ORYLA	-0.742174	-0.947864	Not Interesting
g13859	NA	-0.671445	-1.48335	Not Interesting
g13865	sp|Q8MV48|GALT7_DROME	0.566633	0.622128	Not Interesting
g13866	sp|Q3SX22|BSDC1_BOVIN	-0.426987	-0.55347	Not Interesting
g1387	NA	-2.36744	-1.18078	Not Interesting
g13876	sp|P55067|NCAN_RAT	-1.63975	-2.05149	Not Interesting
g13893	sp|Q80XJ3|TTC28_MOUSE	-0.7285	-1.66955	Foot
g13894	NA	-0.781807	-1.01238	Not Interesting
g13898	sp|Q7PHR1|KIF1A_ANOGA	0.502387	0.848677	Not Interesting
g139	sp|Q9NXG6|P4HTM_HUMAN	-0.223864	-0.447531	Not Interesting
g13902	sp|Q95SX7|RTBS_DROME	0.945862	2.16702	Not Interesting
g13905	sp|Q27245|YH24_CAEEL	0.50139	0.603953	Not Interesting
g13906	sp|Q5ZJ65|FA76A_CHICK	-0.205467	-0.43164	Not Interesting
g13918	sp|P31836|NCAM1_BOVIN	-0.4718	-0.469132	Not Interesting
g13923	sp|Q9DEY9|BLM_XENLA	-0.4349	-0.809622	Not Interesting
g13928	sp|Q6GM44|MARH5_XENLA	0.359264	0.671038	Not Interesting
g13930	sp|O96028|NSD2_HUMAN	-0.294501	-0.573922	Not Interesting
g13932	NA	-1.59601	-1.89952	Not Interesting
g13935	NA	-1.30184	-2.18722	Not Interesting
g13936	sp|Q9UBD5|ORC3_HUMAN	-0.678259	-0.693467	Not Interesting
g13938	NA	0.726855	0.495454	Not Interesting
g13939	sp|Q9CPU4|MGST3_MOUSE	-1.38951	-0.951556	Not Interesting
g13961	NA	-1.54029	-1.05995	Not Interesting
g13965	sp|Q7ZWE3|LARP7_DANRE	-1.29484	-1.53819	Not Interesting
g13967	sp|O43396|TXNL1_HUMAN	0.664372	0.770309	Not Interesting
g1398	sp|Q75WS4|CRYD_XENLA	-0.505312	-0.158246	Not Interesting
g13980	sp|Q9TWL9|COMA_CONMA	0.880101	1.15991	Not Interesting
g13984	sp|P28668|SYEP_DROME	0.809262	0.505499	Not Interesting
g13987	sp|Q8CGC7|SYEP_MOUSE	-0.201658	-0.48166	Not Interesting
g1399	sp|P50533|SMC2_XENLA	-0.958624	-1.40592	Not Interesting
g13990	sp|O18917|B3A3_RABIT	-0.320527	-0.718128	Not Interesting
g13996	sp|Q32KN9|PRLD1_BOVIN	0.501308	0.731993	Not Interesting
g13999	sp|Q00174|LAMA_DROME	0.731148	0.747946	Not Interesting
g14000	sp|Q00174|LAMA_DROME	0.529499	0.368126	Not Interesting
g14001	NA	1.34309	0.719839	Not Interesting
g14005	sp|Q9ESL4|MLTK_MOUSE	-0.92818	-0.456638	Not Interesting
g14012	sp|Q9NYL2|MLTK_HUMAN	0.587228	0.741383	Not Interesting
g14018	sp|Q15063|POSTN_HUMAN	0.460045	-2.2439	Foot
g14028	sp|Q5F3I6|TM104_CHICK	0.135574	0.432907	Not Interesting
g14033	sp|Q5F3I6|TM104_CHICK	1.00089	1.08998	Not Interesting
g14037	sp|Q30T29|GMHA_SULDN	2.34463	1.98305	Not Interesting
g14048	sp|Q9UIK4|DAPK2_HUMAN	0.283547	1.37309	Head
g14049	sp|O00566|MPP10_HUMAN	-0.167869	-0.620472	Not Interesting
g14054	NA	-0.720241	-0.902476	Not Interesting
g14055	NA	-0.602762	-0.743514	Not Interesting
g1406	sp|Q28DB0|TT39B_XENTR	-0.617604	-0.262941	Not Interesting
g14062	sp|Q75N90|FBN3_HUMAN	-0.485532	-0.942804	Not Interesting
g14066	sp|Q91X83|METK1_MOUSE	0.7698	0.886515	Not Interesting
g1407	sp|P31422|GRM3_RAT	-0.451545	-1.02572	Not Interesting
g14070	sp|Q14766|LTBP1_HUMAN	-3.3164	-4.57446	Not Interesting
g14071	sp|Q8CG19|LTBP1_MOUSE	-3.44402	-4.22691	Not Interesting
g14072	NA	-3.47549	-4.79948	Not Interesting
g14074	sp|O88799|ZAN_MOUSE	-3.82411	-4.56706	Not Interesting
g1408	sp|Q5VTQ0|TT39B_HUMAN	-2.03646	-1.57565	Not Interesting
g14100	sp|A7SEP9|RU1C_NEMVE	0.463269	0.673532	Not Interesting
g14107	sp|A8GCA7|RIMK_SERP5	0.939308	1.22373	Not Interesting
g14109	sp|Q80X19|COEA1_MOUSE	-2.32305	-2.9474	Not Interesting
g14122	sp|P61129|ZC3H6_HUMAN	-1.00729	-1.44118	Not Interesting
g14139	NA	-0.836073	-1.0436	Not Interesting
g14140	sp|Q7TSG2|CTDP1_MOUSE	0.522309	0.79406	Not Interesting
g14141	sp|Q99L45|IF2B_MOUSE	0.334213	0.38387	Not Interesting
g14142	sp|Q0VCJ8|METL9_BOVIN	0.745958	0.770248	Not Interesting
g14154	sp|Q6GM06|OTU6B_XENLA	0.626034	0.606419	Not Interesting
g14169	sp|Q3SZM6|COXM1_BOVIN	0.718661	0.813884	Not Interesting
g14182	sp|B8V7Q1|PCDL_ACRMI	-1.21467	-1.5938	Not Interesting
g14184	sp|B8V7Q1|PCDL_ACRMI	-1.32861	-1.73115	Not Interesting
g14185	sp|O15995|CCNE_HEMPU	-0.439978	-0.330055	Not Interesting
g14191	NA	1.15407	0.32988	Not Interesting
g14192	sp|Q3UHD1|BAI1_MOUSE	0.949686	0.823908	Not Interesting
g14193	sp|Q3UHD1|BAI1_MOUSE	1.03568	0.6917	Not Interesting
g14199	NA	0.621379	0.572193	Not Interesting
g142	sp|Q9NXG6|P4HTM_HUMAN	-0.558002	-0.824309	Not Interesting
g14202	NA	-0.857222	-0.887376	Not Interesting
g14204	NA	-2.00849	-2.02298	Not Interesting
g14209	NA	-0.580141	-1.40006	Not Interesting
g14217	NA	-1.33117	-0.981033	Not Interesting
g14220	NA	3.93039	2.85931	Not Interesting
g14229	sp|Q9H772|GREM2_HUMAN	-0.707185	1.7092	Head
g14239	sp|Q9Y6W6|DUS10_HUMAN	0.369842	0.48363	Not Interesting
g14240	sp|Q58ED9|NAA20_DANRE	0.748685	0.830882	Not Interesting
g14242	NA	-0.546225	-0.571127	Not Interesting
g14252	sp|P42003|MAD_DROME	0.469088	0.722918	Not Interesting
g14253	sp|Q6GL69|MK67I_XENTR	0.792492	0.775896	Not Interesting
g14256	sp|Q9H583|HEAT1_HUMAN	-0.517465	-0.828352	Not Interesting
g14257	sp|Q9H583|HEAT1_HUMAN	-0.793815	-1.15668	Not Interesting
g14259	sp|Q8K4Q0|RPTOR_MOUSE	0.470246	0.478464	Not Interesting
g14260	sp|Q8BNA6|FAT3_MOUSE	-0.787724	-1.08434	Not Interesting
g14262	NA	-0.532053	-1.48832	Not Interesting
g14278	sp|Q5RF99|RAEL1_PONAB	0.265575	0.462438	Not Interesting
g14286	sp|Q03001|DYST_HUMAN	-3.05118	-3.85542	Not Interesting
g14295	NA	-1.44054	-1.95858	Not Interesting
g14296	sp|P95648|CBBX_RHOSH	-1.00425	-1.69396	Not Interesting
g143	sp|Q8BG58|P4HTM_MOUSE	-0.643823	-0.755156	Not Interesting
g14300	sp|Q9BSR8|YIPF4_HUMAN	0.870018	0.669632	Not Interesting
g1431	sp|Q8VI36|PAXI_MOUSE	0.531818	0.590989	Not Interesting
g14310	sp|Q6DJN2|TRF6B_XENLA	-0.563877	-1.03666	Not Interesting
g14320	sp|P35400|GRM7_RAT	0.213815	-1.3597	Not Interesting
g14323	sp|Q9Z0T6|PKDRE_MOUSE	-0.715611	-1.02435	Not Interesting
g14330	sp|Q96RW7|HMCN1_HUMAN	-1.11109	-1.20199	Not Interesting
g14332	sp|Q8BTI8|SRRM2_MOUSE	-1.20604	-1.70226	Not Interesting
g1435	NA	-0.776696	-0.796414	Not Interesting
g14350	NA	-1.54829	-0.907507	Not Interesting
g14354	NA	-0.651253	-1.17246	Not Interesting
g14355	NA	-2.25387	-1.67059	Not Interesting
g14358	NA	-0.685298	-1.70775	Not Interesting
g14359	sp|Q99759|M3K3_HUMAN	-0.717093	-1.23731	Not Interesting
g14364	sp|Q61160|FADD_MOUSE	-1.04856	-1.12835	Not Interesting
g14377	NA	-2.22287	-2.75656	Not Interesting
g14378	sp|Q7LHG5|YI31B_YEAST	0.489502	0.748484	Not Interesting
g14383	NA	0.365207	0.265495	Not Interesting
g14386	sp|P42891|ECE1_BOVIN	-0.826327	-1.08021	Not Interesting
g1439	NA	-0.845731	-1.48279	Not Interesting
g14398	sp|Q29RP8|KMT5B_BOVIN	0.263275	0.498676	Not Interesting
g144	sp|Q562C7|PUM3_RAT	-0.508573	-0.954582	Not Interesting
g14402	sp|Q6DG32|S2536_DANRE	0.439576	0.863669	Not Interesting
g14407	sp|P21328|RTJK_DROME	-1.35937	-1.00437	Not Interesting
g14410	sp|Q8NEN9|PDZD8_HUMAN	-0.438571	-0.621034	Not Interesting
g14412	sp|Q8NI27|THOC2_HUMAN	-0.281578	-0.625591	Not Interesting
g14413	sp|B2KI97|THOC2_RHIFE	-0.571253	-0.894386	Not Interesting
g14414	sp|Q8NI27|THOC2_HUMAN	-0.583763	-0.937245	Not Interesting
g14427	sp|Q9UPV9|TRAK1_HUMAN	-0.606662	-1.30136	Not Interesting
g14428	sp|Q17R13|ACK1_BOVIN	-0.526303	-1.53979	Not Interesting
g14432	sp|P59328|WDHD1_MOUSE	-0.979235	-1.48128	Not Interesting
g14433	sp|O13046|WDHD1_XENLA	-0.584778	-1.26622	Not Interesting
g14434	sp|O35166|GOSR2_MOUSE	0.663914	0.841483	Not Interesting
g14435	sp|Q91175|ADA1A_ORYLA	-0.117281	-0.810409	Not Interesting
g14439	sp|Q91ZX7|LRP1_MOUSE	-1.56197	-1.97091	Not Interesting
g1444	sp|Q06852|SLAP1_CLOTH	-2.77166	-3.12144	Not Interesting
g14442	sp|Q6PCX9|TRI37_MOUSE	-0.422267	-0.192294	Not Interesting
[truncated: 5,378 more rows]

## Sheet: Fig. 1H
Peak ID	Gene ID	Swissprot Annotation	Foot Reg logFC	Head Reg logFC	Structural Enrichment
[truncated: 7,965 more rows]

[truncated: 1 more sheets: Fig. 1I]
