# Supplementary material for: Generic injuries are sufficient to induce ectopic Wnt organizers in Hydra
Source: eLife. 2021 Mar 29;10:e60562. doi: 10.7554/eLife.60562 (PMC8049744; doi:10.7554/eLife.60562)
Supplement: Figure 2—figure supplement 1—source data 1. — Values in the table correspond to counts per million. For plotting the heatmap, the data were normalized by row such that the minimum value was 0 and the maximum value was 1. [file elife-60562-fig2-figsupp1-data1.xlsx]

## Sheet: Description
Fig.2 Sup.1	Average log2(CPM) for Wnt pathway genes during head and foot regeneration

## Sheet: Figure_2_Supplement_1
	0FR	3FR	8FR	12FR	0HR	3HR	8HR	12HR
g12274	2.94644	3.44125	3.86658	3.4962	2.95086	3.34835	5.01824	6.26
g14938	5.81507	5.97589	6.30082	5.90484	5.69942	5.84836	7.32291	7.94754
g27364	6.56736	6.52854	6.97898	7.1219	6.31938	6.38038	7.56393	8.73639
g23252	5.30614	5.178	5.37938	5.27599	5.31221	5.17625	5.99358	6.19284
g30442	6.41576	6.65879	6.94264	6.53174	5.69841	6.03528	8.03441	8.62021
g20457	6.18594	6.20992	6.29804	6.15207	6.1652	6.20548	6.36234	6.40602
g27891	6.40813	6.00555	6.32336	6.45525	6.15435	5.8544	6.53831	7.01929
g29784	3.69428	3.32365	3.68038	3.54085	3.72832	3.40152	3.59509	4.05265
g29750	-2.34417	0.081484	-1.47481	-1.51473	-2.17226	-0.254891	2.13328	3.27243
g29781	5.00084	5.61914	5.21301	5.33422	4.95853	5.32846	5.75512	6.66504
g21027	-1.98027	-0.770386	-0.828476	-1.41457	-1.20078	0.014296	0.000161333	1.74149
g33373	0.0221702	2.80791	0.117509	-0.248931	-1.61586	2.49462	5.1926	5.67196
g33422	6.17009	7.18271	5.54257	5.02309	5.69649	6.22105	8.26498	8.67681
g16018	2.33025	2.48469	2.25261	2.11008	2.31314	2.26922	2.12059	2.57887
g30896	7.44414	7.45856	7.44012	7.4133	7.44159	7.47237	7.40316	7.56519
g10093	4.02727	4.25608	4.32406	4.2219	3.95095	4.18796	4.3165	4.34878
g18842	2.56612	5.17337	5.25015	3.89554	2.60354	4.78182	5.96021	5.56489
g7262	8.26924	8.96034	8.93343	9.07814	8.42365	8.94682	9.18031	9.57886
g28064	2.72102	4.24343	3.43542	3.43397	1.07028	3.34437	4.08531	4.64717
g3963	0.85482	1.11459	0.902077	1.20381	0.546594	1.02255	0.903835	1.12492
g20465	6.18711	6.12734	6.17982	6.4547	6.25392	6.22038	6.27125	6.66437
g20391	7.53501	7.39079	7.54153	8.02865	7.51865	7.43875	7.78704	8.61596
g14954	5.938	5.89264	5.90296	6.22686	5.95033	5.88936	5.94482	6.40021
g26902	2.74848	2.57789	2.83784	3.05076	2.53453	2.73209	2.63415	3.47882
g17460	4.94068	4.70933	4.75286	5.07513	4.95255	4.82513	4.81058	5.31971
g1084	6.13237	6.22165	6.32279	6.6404	6.10745	6.25184	6.41505	6.80602
g29970	5.98059	6.11914	6.0731	6.3119	5.94242	6.04788	6.11086	6.5246
g7820	5.14128	4.62463	5.02408	5.38262	4.87239	4.54965	4.49879	4.99657
g507	4.99591	4.39166	4.43857	4.8541	4.87233	4.54674	4.36458	5.15337
g20966	5.05244	4.92313	4.66891	3.8587	5.00362	4.99651	4.64072	3.04434
g20965	5.97122	5.84858	5.68953	4.80276	6.00373	5.93332	5.5589	4.09399
g1155	6.98538	6.8599	6.66457	6.50558	6.87195	6.83349	6.31782	5.27396
g15582	7.84012	7.59435	7.3283	6.68138	7.6309	7.45582	7.0742	5.23928
g31984	4.90178	4.86746	4.84389	4.71761	5.00868	4.89172	4.84068	4.78781
g29256	2.51617	1.99011	1.75341	1.71372	2.76232	2.12414	2.06087	1.52065
g13412	4.52969	4.0095	4.38417	4.09403	4.44832	4.13705	4.3086	4.14105
g16013	1.16057	1.2713	0.727881	1.11693	1.40783	1.16378	0.659248	1.1463
g17348	7.20986	6.18672	5.58927	6.18135	7.42818	6.80899	6.16983	6.89499
g30874	5.79305	5.87399	5.80589	5.7121	5.90709	5.87681	5.81113	5.88308
