# Supplementary material for: Generic injuries are sufficient to induce ectopic Wnt organizers in Hydra
Source: eLife. 2021 Mar 29;10:e60562. doi: 10.7554/eLife.60562 (PMC8049744; doi:10.7554/eLife.60562)
Supplement: Figure 2—source data 1. — The first sheet in the workbook (‘Descriptions’) contains individual descriptions for all tables included in the workbook. [file elife-60562-fig2-data1.xlsx]

## Sheet: Descriptions
Fig. 2A	Comparison of structural enrichment in single cell data (SC.8 in Sup. File 2) to structural enrichment during regeneration (HR8vRF8c0 in Sup. File 2) at 8 hpa. Uses the same transcript subset as Fig. 1E.
Fig. 2B	Comparison of structural enrichment in single cell data (SC.8 in Sup. File 1) to structural enrichment during regeneration (HRRF8c0 in Sup. File 1) at 8 hpa. Uses the same peak subset as Fig. 1F.
Fig. 2C	Comparison of structural enrichment in single cell data (SC.12 in Sup. File 2) to structural enrichment during regeneration (HR12vFR12c0 in Sup. File 2) at 12 hpa. Uses the same transcript subset as Fig. 1G.
Fig. 2D	Comparison of structural enrichment in single cell data (SC.12 in Sup. File 1) to structural enrichment during regeneration (HRFR12c0 in Sup. File 1) at 12 hpa. Uses the same peak subset as Fig. 1H.

## Sheet: Fig. 2A
ID	Regen LogFC	SC LogFC	Structure Enrichment	Swissprot Annotation
g10034	-0.0689037	-1.00295	NoEnrichment	sp|P08419|CEL2A_PIG
g10056	0.191039	-0.0584922	NoEnrichment	sp|P0CJ14|VP302_LYCMC
g10300	0.9038	0.200467	NoEnrichment	sp|Q76KP1|B4GN4_HUMAN
g10485	0.0212281	0.269183	NoEnrichment	NA
g10513	0.0536798	0.0338911	NoEnrichment	sp|Q9DB27|MCTS1_MOUSE
g10536	-0.151142	0.218315	NoEnrichment	sp|Q08874|MITF_MOUSE
g10594	0.113301	0.10339	NoEnrichment	sp|O35426|XBP1_MOUSE
g1063	0.0783274	0.0366566	NoEnrichment	sp|P0DN09|VKT5_ANEVI
g1064	0.0959693	0.0837701	NoEnrichment	sp|Q28864|TFPI1_MACMU
g10649	-0.109223	0.036739	NoEnrichment	sp|Q9VJ79|PDE11_DROME
g10650	0.603294	-0.0472527	NoEnrichment	sp|Q7LL04|YQK1_SCHPO
g10680	1.58497	-1.43203	NoEnrichment	sp|H2A0N9|KCP4_PINMG
g10706	-0.197661	-0.00713079	NoEnrichment	sp|P0CP96|FKBP2_CRYNJ
g10737	0.301107	-0.00347535	NoEnrichment	sp|D4AK17|PLCX1_ARTBC
g10787	-0.453049	0.737873	NoEnrichment	sp|D3ZHA0|FLNC_RAT
g10817	0.782743	0.0182345	NoEnrichment	sp|Q26627|SUREJ_STRPU
g10818	0.986887	0.0365797	NoEnrichment	sp|Q7TN88|PK1L2_MOUSE
g10850	-0.959579	-0.159369	NoEnrichment	NA
g10915	-0.15163	0.0394501	NoEnrichment	sp|P24288|BCAT1_MOUSE
g10932	-0.000269587	-0.000989353	NoEnrichment	sp|P29061|CHIB_TOBAC
g10933	0.251471	0.0362681	NoEnrichment	sp|Q9Y2H1|ST38L_HUMAN
g10944	-0.253473	-0.514939	NoEnrichment	sp|Q9PSX7|RHOC_CHICK
g10950	1.03712	-0.0934112	NoEnrichment	NA
g1096	0.0490022	-0.0628854	NoEnrichment	sp|Q63429|UBC_RAT
g10961	-0.284091	-0.0624291	NoEnrichment	sp|Q9CYL5|GAPR1_MOUSE
g10967	0.62851	0.0193439	NoEnrichment	NA
g10986	0.395217	-0.625599	NoEnrichment	NA
g11021	0.25711	0.0792719	NoEnrichment	sp|O76075|DFFB_HUMAN
g11058	-0.0879039	-0.110819	NoEnrichment	sp|C4R7Z3|C9MT_KOMPG
g11062	-0.0896196	0.95829	NoEnrichment	sp|Q9H4G4|GAPR1_HUMAN
g11095	-0.226138	0.0370561	NoEnrichment	sp|P97494|GSH1_MOUSE
g11134	-0.113829	-0.426786	NoEnrichment	NA
g11204	0.0099092	0.00766255	NoEnrichment	sp|Q54TR1|CFAD_DICDI
g1125	0.353329	-0.0312896	NoEnrichment	sp|Q00G26|PLIN5_HUMAN
g11351	0.16528	0.020799	NoEnrichment	sp|Q7SIB2|CO4A1_BOVIN
g11352	0.155606	0.202811	NoEnrichment	sp|P08120|CO4A1_DROME
g11353	0.158241	0.285775	NoEnrichment	sp|Q4ZJM7|OTOL1_MOUSE
g11354	0.18941	0.129132	NoEnrichment	sp|P05099|MATN1_CHICK
g11355	0.129832	0.262156	NoEnrichment	sp|P27393|CO4A2_ASCSU
g11363	0.0658773	0.0548955	NoEnrichment	sp|P35520|CBS_HUMAN
g11398	0.309918	-0.0460322	NoEnrichment	sp|Q7SXW3|LRC40_DANRE
g11444	2.22128	0.165414	Head	sp|Q9H7M6|ZSWM4_HUMAN
g11446	-0.225573	-0.00397157	NoEnrichment	NA
g11469	0.284169	0.0180654	NoEnrichment	NA
g11470	0.668304	0.10354	NoEnrichment	sp|Q96LW9|ZSC31_HUMAN
g11471	0.113042	0.37037	NoEnrichment	sp|P24044|CALM_PLAFA
g11501	0.886612	0.0416708	NoEnrichment	NA
g11528	-0.185999	0.357302	NoEnrichment	sp|P02466|CO1A2_RAT
g11588	-0.280905	-0.0127258	NoEnrichment	NA
g11692	0.0788235	0.0458	NoEnrichment	sp|Q9JJC6|RIPL1_MOUSE
g11696	0.0784936	1.60121	NoEnrichment	sp|P39921|TPM1_HYDVU
g11697	0.183435	-0.375287	NoEnrichment	sp|P55112|NAS4_CAEEL
g11698	0.68906	0.018786	NoEnrichment	sp|P55112|NAS4_CAEEL
g11714	0.11202	0.0184102	NoEnrichment	sp|Q9HCF6|TRPM3_HUMAN
g11718	1.19753	0.348396	NoEnrichment	NA
g11745	1.04869	0.370634	Head	sp|Q90623|MYPT1_CHICK
g1176	-0.17043	0.00503609	NoEnrichment	sp|P07942|LAMB1_HUMAN
g11765	-0.0936705	0.118922	NoEnrichment	sp|P54366|GSC_DROME
g11780	-1.26228	-0.117803	NoEnrichment	sp|Q62445|SP4_MOUSE
g11880	-0.543889	0.0441391	NoEnrichment	sp|Q17RW2|COOA1_HUMAN
g11950	0.91579	0.0556975	NoEnrichment	sp|Q8CFH6|SIK2_MOUSE
g11978	-0.560286	-0.0318129	NoEnrichment	sp|Q5EA92|AL14E_BOVIN
g1199	-0.0563322	0.0190036	NoEnrichment	sp|P42674|BP10_PARLI
g11994	0.613095	0.001449	NoEnrichment	NA
g11996	0.294709	0.0571628	NoEnrichment	sp|A5PN43|TM175_DANRE
g12040	1.16287	0.0218629	NoEnrichment	NA
g12061	0.160576	0.0697813	NoEnrichment	sp|Q08DQ2|GFPT2_BOVIN
g12120	-0.0950242	-0.221823	NoEnrichment	sp|P50280|MMP7_RAT
g12223	0.427861	0.329125	NoEnrichment	sp|D3ZDI6|MYLIP_RAT
g12231	-0.220955	-0.012964	NoEnrichment	sp|P81439|EQST_ACTEQ
g12236	1.1504	-0.203177	NoEnrichment	NA
g12259	-0.0195347	0.00134752	NoEnrichment	sp|Q80ZF8|AGRB3_MOUSE
g12274	1.19686	-0.581055	NoEnrichment	sp|G5ECQ2|FRIZ2_CAEEL
g12277	0.129494	-0.0109126	NoEnrichment	sp|Q5SRI9|MANEA_HUMAN
g12280	-0.11881	0.0163756	NoEnrichment	sp|Q6TGY8|EMC2_DANRE
g12434	-0.315905	0.00326688	NoEnrichment	sp|A4GTP4|ELK1_RAT
g12447	0.146902	-0.206787	NoEnrichment	sp|A4GTP4|ELK1_RAT
g12458	-0.745029	0.0019203	NoEnrichment	sp|P0C548|PLPL2_RAT
g12461	-0.0729251	-0.228784	NoEnrichment	sp|O18405|SURF4_DROME
g12471	0.288965	0.827842	NoEnrichment	NA
g1253	-0.208241	-0.00717547	NoEnrichment	NA
g1254	-0.733281	0.00613299	NoEnrichment	NA
g12567	1.16736	0.25858	NoEnrichment	sp|P48430|SOX2_CHICK
g12568	-0.042502	-0.00983874	NoEnrichment	NA
g12571	0.158306	0.000884446	NoEnrichment	sp|Q17QJ5|TSN5_BOVIN
g12585	0.0889021	0.00584209	NoEnrichment	sp|A2AVA0|SVEP1_MOUSE
g12639	-0.246734	0.00974445	NoEnrichment	NA
g12710	1.78887	0.122974	NoEnrichment	sp|P35283|RAB12_MOUSE
g12732	0.436225	-0.311141	NoEnrichment	sp|Q8CIS0|CAR11_MOUSE
g1275	-0.404239	0.193333	NoEnrichment	sp|P27918|PROP_HUMAN
g1276	-0.443724	0.315736	NoEnrichment	sp|Q96RW7|HMCN1_HUMAN
g12783	0.0591153	0.0478346	NoEnrichment	sp|Q9ULC3|RAB23_HUMAN
g1279	-0.343961	1.05754	NoEnrichment	NA
g12822	0.658183	-0.17135	NoEnrichment	NA
g12875	-0.248853	-0.22673	NoEnrichment	NA
g12884	0.0814073	-0.256995	NoEnrichment	sp|P80513|MANF_BOVIN
g12951	1.6393	-0.00918886	NoEnrichment	NA
g12992	0.68984	-0.00224238	NoEnrichment	sp|P69478|CHSTB_RAT
g1301	0.728976	0.104224	NoEnrichment	NA
g13019	-1.63471	-0.24173	NoEnrichment	sp|P16273|PRPX_HORVU
g13020	-0.583981	-0.258923	NoEnrichment	sp|P16273|PRPX_HORVU
g13058	0.171568	0.563128	NoEnrichment	sp|H6BDU4|SODC_CAMDR
g13063	-0.168045	-0.0127679	NoEnrichment	NA
g1320	0.90308	0.0398397	NoEnrichment	sp|Q8K007|SULF1_MOUSE
g13212	-0.246066	0.362513	NoEnrichment	sp|Q9Y6L7|TLL2_HUMAN
g13225	0.0152443	0.0466501	NoEnrichment	sp|O43172|PRP4_HUMAN
g13247	0.415058	-0.191004	NoEnrichment	sp|Q9KWN0|AHV_ACTSK
g13250	0.487453	-0.677375	NoEnrichment	sp|Q9KWN0|AHV_ACTSK
g13307	0.0638987	-0.0491849	NoEnrichment	sp|P41252|SYIC_HUMAN
g13309	0.105736	-0.0561068	NoEnrichment	sp|P41252|SYIC_HUMAN
g13376	0.188703	-0.0521342	NoEnrichment	sp|Q9GLY5|ITIH3_RABIT
g1338	-0.138236	0.0167738	NoEnrichment	sp|Q9GNN8|CTXA_CARAL
g13448	-0.155062	-0.0623207	NoEnrichment	sp|Q08759|MYB_XENLA
g13514	0.0467702	0.03402	NoEnrichment	sp|Q9BX10|GTPB2_HUMAN
g13544	0.083447	0.0262116	NoEnrichment	sp|O08992|SDCB1_MOUSE
g13587	2.02483	-0.0017216	NoEnrichment	sp|Q64121|PRLHR_RAT
g13619	1.4835	0.0122958	NoEnrichment	NA
g13748	0.158251	0.00782111	NoEnrichment	NA
g13749	0.164065	0.0159252	NoEnrichment	sp|Q8WXH0|SYNE2_HUMAN
g13759	-0.072718	-0.115701	NoEnrichment	sp|Q9UNL2|SSRG_HUMAN
g13801	0.131028	0.0207198	NoEnrichment	sp|Q5UQ60|YL662_MIMIV
g13803	0.0323861	-0.00713208	NoEnrichment	sp|Q6ING7|FLAD1_XENLA
g13929	-0.116123	1.20238	NoEnrichment	sp|Q5RA22|5NTC_PONAB
g14000	-0.117829	0.0431932	NoEnrichment	sp|Q00174|LAMA_DROME
g14018	-1.98359	-0.0578587	NoEnrichment	sp|Q15063|POSTN_HUMAN
g14048	0.3487	0.185443	NoEnrichment	sp|Q9UIK4|DAPK2_HUMAN
g14107	0.172857	0.0609118	NoEnrichment	sp|A8GCA7|RIMK_SERP5
g14213	0.178085	0.0113191	NoEnrichment	NA
g14220	-0.654947	-0.00606548	NoEnrichment	NA
g14229	1.58613	0.169721	Head	sp|Q9H772|GREM2_HUMAN
g14239	0.213123	-0.0031358	NoEnrichment	sp|Q9Y6W6|DUS10_HUMAN
g143	-0.0760846	0.0340106	NoEnrichment	sp|Q8BG58|P4HTM_MOUSE
g1435	-0.00435916	0.00829114	NoEnrichment	NA
g14380	0.435177	0.357508	NoEnrichment	sp|O77775|NCF2_BOVIN
g14383	0.0798805	0.269394	NoEnrichment	NA
g1439	-0.762451	0.0167997	NoEnrichment	NA
g14402	0.307687	0.180721	NoEnrichment	sp|Q6DG32|S2536_DANRE
g14470	1.06591	0.024505	NoEnrichment	sp|P53690|MMP14_MOUSE
g14473	0.0641939	0.0911093	NoEnrichment	NA
g1450	0.822759	-0.108714	NoEnrichment	sp|P18870|JUN_CHICK
g14502	-0.0619318	0.090567	NoEnrichment	sp|Q9BW91|NUDT9_HUMAN
g14514	0.177096	-0.00128572	NoEnrichment	NA
g1460	0.0875556	-0.108985	NoEnrichment	sp|Q9DBU3|RIOK3_MOUSE
g1461	1.64716	-0.0160577	NoEnrichment	NA
g14685	0.916584	-0.8788	NoEnrichment	sp|Q08E39|SPY2_BOVIN
g14688	0.453198	-0.0791206	NoEnrichment	sp|Q54TL0|KIF7_DICDI
g14694	0.166636	-0.0556719	NoEnrichment	sp|Q6GNJ8|VPS72_XENLA
g14708	-0.394705	-0.89279	NoEnrichment	NA
g1473	0.0791167	-0.000438292	NoEnrichment	sp|Q5USW0|GDF8_TAUDE
g14746	-0.101041	0.00645791	NoEnrichment	sp|Q9H324|ATS10_HUMAN
g14799	-0.0239745	-0.0287684	NoEnrichment	sp|Q86TX2|ACOT1_HUMAN
g14800	0.590317	-0.0176965	NoEnrichment	sp|Q8CGB3|UACA_MOUSE
g14801	0.37867	-0.131447	NoEnrichment	sp|Q80WQ9|ZBED4_MOUSE
g14855	-0.524862	-0.0771563	NoEnrichment	NA
g14866	0.264274	-0.0514334	NoEnrichment	sp|P25931|NPYR_DROME
g14912	-0.786012	0.3848	NoEnrichment	NA
g14938	1.14211	0.241047	Head	sp|O15169|AXIN1_HUMAN
g14978	0.20171	0.137766	NoEnrichment	NA
g14987	-0.0113442	0.00936518	NoEnrichment	sp|Q569D5|SBP1_XENTR
g15	0.0541082	-0.0176029	NoEnrichment	sp|P49355|FNTB_BOVIN
g15015	0.282633	0.178461	NoEnrichment	sp|P22757|HE_PARLI
g15069	-0.133254	0.0237848	NoEnrichment	sp|Q0VA16|WDR70_XENTR
g15095	-0.0345382	-0.00503267	NoEnrichment	sp|P19440|GGT1_HUMAN
g15120	-0.420641	-0.108429	NoEnrichment	sp|Q9CWS0|DDAH1_MOUSE
g15129	-0.296915	0.0698311	NoEnrichment	sp|P32020|NLTP_MOUSE
g15133	0.0733297	0.164011	NoEnrichment	sp|Q6MG82|PRRT1_RAT
g15165	-0.0187978	0.0169727	NoEnrichment	sp|P58058|NADK_MOUSE
g15181	0.726657	-0.473698	NoEnrichment	sp|Q3SZE3|PLPP3_BOVIN
g15185	-0.281536	0.00711618	NoEnrichment	sp|Q95334|AMPE_PIG
g15226	1.43733	0.0013844	NoEnrichment	sp|A6YP92|ARX_RAT
g15293	0.363419	-0.0278971	NoEnrichment	sp|Q98TB4|GDF8_OREMO
g15359	0.288882	0.379257	NoEnrichment	sp|O60481|ZIC3_HUMAN
g15375	0.041971	-0.00684305	NoEnrichment	NA
g15387	-0.400382	-0.296353	NoEnrichment	sp|Q566X8|DMX1B_DANRE
g1539	-0.210984	0.00257655	NoEnrichment	NA
g15442	0.0982603	0.0867413	NoEnrichment	NA
g15451	-1.14211	-0.0378777	NoEnrichment	sp|P47799|FSHR_HORSE
g15457	-0.0209534	0.152909	NoEnrichment	sp|O35815|ATX3_RAT
g15458	-0.0220867	-0.00752055	NoEnrichment	sp|B2LU20|SFXN1_SHEEP
g15493	-0.204047	0.185154	NoEnrichment	sp|Q8VHI3|OFUT2_MOUSE
g15494	1.7456	0.00040552	NoEnrichment	sp|Q8N2E2|VWDE_HUMAN
g15578	-0.0309619	0.00093911	NoEnrichment	NA
g15603	0.128921	0.507493	NoEnrichment	sp|Q9QYF1|RDH11_MOUSE
g15629	0.163898	0.0931493	NoEnrichment	sp|P18519|TNR16_CHICK
g15630	-0.0720591	-1.59152	NoEnrichment	sp|H2A0N9|KCP4_PINMG
g15640	-0.299264	0.162565	NoEnrichment	sp|Q9YIB7|ZIC2B_XENLA
g15667	-0.0998687	0.00506931	NoEnrichment	sp|P54001|P4HA1_RAT
g15668	0.0325436	0.00251827	NoEnrichment	sp|P10079|FBP1_STRPU
g15679	0.5876	0.165238	NoEnrichment	NA
g15773	0.725891	0.745809	NoEnrichment	NA
g15775	0.387018	0.0240724	NoEnrichment	NA
g15894	-1.15197	0.321289	NoEnrichment	sp|B5ZYI7|DUT_RHILW
g15913	1.96614	-0.0257083	NoEnrichment	sp|Q63ZI0|KCNK9_XENLA
g15980	-0.317752	0.000242161	NoEnrichment	sp|Q8IVL0|NAV3_HUMAN
g16071	0.189716	0.068956	NoEnrichment	sp|Q9LVK9|ALA7_ARATH
g1608	-0.151605	-0.139301	NoEnrichment	sp|P98155|VLDLR_HUMAN
g16165	2.96323	0.42501	Head	sp|Q61467|ZIC4_MOUSE
g16168	0.00697367	-0.219322	NoEnrichment	sp|Q90593|GRP78_CHICK
g16204	0.183384	-0.248408	NoEnrichment	sp|D3YXG0|HMCN1_MOUSE
g16227	-0.442232	0.00115645	NoEnrichment	sp|Q64077|NK2R_CAVPO
g1624	0.183346	0.222024	NoEnrichment	sp|Q61115|PTC1_MOUSE
g16330	-0.0519566	-0.0901412	NoEnrichment	sp|P48723|HSP13_HUMAN
g1642	0.194832	0.0317196	NoEnrichment	sp|A5PJM7|DEFI8_BOVIN
g16431	-0.34384	0.135398	NoEnrichment	sp|Q9P2N4|ATS9_HUMAN
g16491	0.718	-0.0661158	NoEnrichment	sp|P51984|CREB_HYDVD
g16493	2.93481	0.0097513	NoEnrichment	NA
g16500	-0.992456	-0.000202464	NoEnrichment	sp|P46824|KLC_DROME
g16557	1.0823	-0.0122276	NoEnrichment	sp|Q09604|VAB15_CAEEL
g16717	0.134548	0.00192612	NoEnrichment	sp|P58478|HTPG_RICCN
g16788	-0.195529	0.0636796	NoEnrichment	NA
g16805	0.201165	0.00235355	NoEnrichment	sp|O75445|USH2A_HUMAN
g16879	-0.558225	-0.122249	NoEnrichment	sp|Q9VSF3|UBC12_DROME
g16882	0.426894	-2.58187	NoEnrichment	NA
g1696	-0.412685	-0.00496216	NoEnrichment	sp|O95490|AGRL2_HUMAN
g16973	2.69158	0.00489518	NoEnrichment	sp|Q6WZ18|NGB_CANLF
g1705	1.0788	-0.0332566	NoEnrichment	sp|Q8N8A2|ANR44_HUMAN
g1718	0.996203	0.219396	NoEnrichment	sp|P69478|CHSTB_RAT
g17202	0.00283192	0.302048	NoEnrichment	sp|P70191|TRAF5_MOUSE
g17212	-0.166279	-0.00364884	NoEnrichment	sp|Q18297|TRPA1_CAEEL
g17270	-0.216885	0.0109511	NoEnrichment	sp|P00630|PA2_APIME
g17348	0.380061	-0.134648	NoEnrichment	sp|A0A0K3AWM6|MOM5_CAEEL
g17371	0.0668912	0.038924	NoEnrichment	sp|Q5F408|SYCC_CHICK
g17372	-0.145195	0.00188387	NoEnrichment	sp|P55268|LAMB2_HUMAN
g1743	0.144459	0.100279	NoEnrichment	sp|Q16363|LAMA4_HUMAN
g17465	2.20788e-05	-0.101327	NoEnrichment	sp|Q9H8Y8|GORS2_HUMAN
g17469	0.541041	0.00114841	NoEnrichment	NA
g17506	-0.167948	-0.00459766	NoEnrichment	sp|P54707|AT12A_HUMAN
g17635	0.0263663	0.0218963	NoEnrichment	sp|Q18297|TRPA1_CAEEL
g17667	-0.138212	-0.00560952	NoEnrichment	sp|Q3UGY8|BIG3_MOUSE
g1771	-0.18364	-2.35285	NoEnrichment	sp|Q9VYN8|TENA_DROME
g17730	0.00745465	-0.0362964	NoEnrichment	sp|Q8N2M4|TM86A_HUMAN
g17774	-0.00464732	0.0325255	NoEnrichment	sp|Q5BLE8|RETST_DANRE
g17795	0.0503487	0.00369039	NoEnrichment	sp|Q61847|MEP1B_MOUSE
g1782	-0.203372	0.0347269	NoEnrichment	sp|P35668|GSHB_XENLA
g17848	0.417997	-0.0151068	NoEnrichment	sp|Q92481|AP2B_HUMAN
g17880	-0.0897987	-0.0497672	NoEnrichment	sp|Q2PFN5|SPY2_MACFA
g17891	-0.0789483	-0.0215911	NoEnrichment	sp|Q93YS4|AB22G_ARATH
g17908	0.412571	0.0714364	NoEnrichment	sp|Q75N90|FBN3_HUMAN
g17917	0.685264	0.564832	NoEnrichment	sp|Q27052|FCA1_TRYRA
g17928	-0.0454825	0.962787	NoEnrichment	NA
g17949	-0.471312	0.00664838	NoEnrichment	sp|Q7Z494|NPHP3_HUMAN
g17979	0.46549	0.236349	NoEnrichment	sp|P02510|CRYAB_BOVIN
g17982	-0.225088	0.0864028	NoEnrichment	sp|P02510|CRYAB_BOVIN
g17988	0.791208	0.171285	NoEnrichment	sp|P02510|CRYAB_BOVIN
g17998	0.166461	0.229019	NoEnrichment	sp|P02510|CRYAB_BOVIN
g18016	-0.368219	0.0122789	NoEnrichment	sp|Q11126|FUT3_BOVIN
g18017	0.150616	0.0516563	NoEnrichment	sp|Q11128|FUT5_HUMAN
g18022	-0.0333376	0.0156485	NoEnrichment	NA
g18029	0.0503542	0.0693265	NoEnrichment	NA
g181	0.63142	0.173634	NoEnrichment	sp|Q60738|ZNT1_MOUSE
g18200	1.19465	-0.170932	NoEnrichment	sp|Q99578|RIT2_HUMAN
g18215	0.470341	0.028089	NoEnrichment	sp|Q9BQS2|SYT15_HUMAN
g18277	-0.217126	2.01324	NoEnrichment	sp|Q9H4G4|GAPR1_HUMAN
g18285	-0.386986	0.00166336	NoEnrichment	NA
g18299	-0.417341	0.00165346	NoEnrichment	sp|P10079|FBP1_STRPU
g18303	-0.112123	0.00128575	NoEnrichment	sp|P10079|FBP1_STRPU
g18321	0.154955	-0.400191	NoEnrichment	NA
g18331	0.223328	0.0447747	NoEnrichment	NA
g1834	0.0385725	-0.00395674	NoEnrichment	sp|Q5NVI9|DNJA1_PONAB
g18373	-0.307838	0.147176	NoEnrichment	NA
g18439	-0.481323	0.251536	NoEnrichment	NA
g18477	-0.425547	0.087979	NoEnrichment	sp|Q5TJ56|FORF_DICDI
g18524	0.049608	0.0423136	NoEnrichment	NA
g18525	0.0621203	0.0505477	NoEnrichment	sp|O15014|ZN609_HUMAN
g18549	-0.0696174	0.0111226	NoEnrichment	NA
g1858	0.274982	0.000306417	NoEnrichment	sp|Q2Z1R2|SOX1B_DANRE
g18690	-0.388724	0.0326215	NoEnrichment	sp|O75762|TRPA1_HUMAN
g18700	0.103379	0.0164278	NoEnrichment	sp|Q9QXM0|ABHD2_MOUSE
g18717	0.190051	-1.13374	NoEnrichment	NA
g18737	0.450662	-0.00478311	NoEnrichment	sp|Q6NVD0|FREM2_MOUSE
g18743	0.0317651	-0.0123812	NoEnrichment	sp|Q5SZK8|FREM2_HUMAN
g18779	-0.523111	-0.409123	NoEnrichment	sp|Q61041|NPY4R_MOUSE
g18842	0.693032	0.109993	NoEnrichment	sp|Q6DID7|WLS_MOUSE
g18947	0.181436	0.0682492	NoEnrichment	sp|Q8NB14|UBP38_HUMAN
g18951	0.0779574	0.237563	NoEnrichment	sp|P38571|LICH_HUMAN
g18952	-0.129428	0.0299699	NoEnrichment	sp|O15072|ATS3_HUMAN
g18982	-0.0356644	0.00465105	NoEnrichment	sp|P34908|BRAF_COTJA
g18986	0.0484987	0.00365389	NoEnrichment	sp|P15056|BRAF_HUMAN
g19012	0.484845	-0.33529	NoEnrichment	sp|Q7LL04|YQK1_SCHPO
g19215	0.394464	-0.0621801	NoEnrichment	NA
g19216	0.0962152	0.00335	NoEnrichment	sp|Q6GQB9|EDEM3_XENLA
g19230	-0.0316076	0.043227	NoEnrichment	sp|Q9EQX4|AIF1L_MOUSE
g19253	1.05061	0.559961	Head	sp|P47728|CALB2_RAT
g19275	-0.0939148	0.0205905	NoEnrichment	sp|Q6NSM8|SIK3_DANRE
g19288	0.249198	0.0295062	NoEnrichment	sp|Q967D7|TUTL_DROME
g19310	0.331183	0.020284	NoEnrichment	sp|Q01262|HYUA_PSESN
g19355	1.04637	-0.0784977	NoEnrichment	NA
g19363	-0.396263	0.110955	NoEnrichment	sp|Q32NH8|PLCD4_XENLA
g194	-0.0999989	0.017305	NoEnrichment	sp|Q59536|PTRB_MORLA
g19401	0.0460209	-0.25595	NoEnrichment	sp|Q9JI85|NUCB2_RAT
g19404	-0.0775929	0.00359135	NoEnrichment	sp|Q15058|KIF14_HUMAN
g1942	-0.262982	0.0192822	NoEnrichment	sp|Q6DHR8|NGBR_DANRE
g19421	-0.238986	0.0618572	NoEnrichment	sp|O08629|TIF1B_RAT
g19422	-0.226588	0.000265768	NoEnrichment	NA
g19496	0.290853	-0.376124	NoEnrichment	sp|P63255|CRIP1_RAT
g19531	0.594344	1.70779	NoEnrichment	NA
g19567	0.0125742	-0.00455811	NoEnrichment	sp|Q9R0U0|SRS10_MOUSE
g19568	-1.02262	-0.346505	NoEnrichment	NA
g19677	-0.0388636	0.0572708	NoEnrichment	sp|A7RWD2|CIAO1_NEMVE
g1973	0.30078	0.330711	NoEnrichment	sp|Q52KG5|KI26A_MOUSE
g19768	0.892859	0.0156583	NoEnrichment	sp|P32254|RASS_DICDI
g19890	1.63757	0.00244616	NoEnrichment	NA
g19927	1.05334	0.0114392	NoEnrichment	sp|P06727|APOA4_HUMAN
g19973	0.525645	0.00455243	NoEnrichment	sp|P91953|HE_HEMPU
g19975	-0.212561	-0.0344097	NoEnrichment	sp|Q54RZ7|Y1199_DICDI
g19984	0.511125	0.00171484	NoEnrichment	sp|Q02225|SKI_XENLA
g20012	0.763573	0.215235	NoEnrichment	NA
g20037	1.35051	-0.0229023	NoEnrichment	NA
g2004	0.139562	0.122676	NoEnrichment	sp|Q6NUX8|RHOAA_DANRE
g20083	0.723286	-0.0400152	NoEnrichment	sp|O57525|CP17A_RANDY
g20086	-0.212914	-1.41541e-05	NoEnrichment	sp|Q19849|EGL44_CAEEL
g20096	0.148727	0.0791024	NoEnrichment	NA
g2010	-0.129532	0.0544533	NoEnrichment	sp|O94827|PKHG5_HUMAN
g2011	0.118866	-0.01946	NoEnrichment	sp|O94827|PKHG5_HUMAN
g20117	0.139852	-0.019042	NoEnrichment	NA
g2028	0.318371	0.365962	NoEnrichment	NA
g20340	-0.246237	0.238051	NoEnrichment	NA
g20349	0.324308	0.282949	NoEnrichment	sp|P64922|Y2028_MYCBO
g2038	-0.843673	0.71985	NoEnrichment	sp|P35400|GRM7_RAT
g20537	0.392156	-0.0518271	NoEnrichment	sp|Q08790|BLC_VIBCH
g20552	0.203655	0.00216985	NoEnrichment	sp|K7Z9Q9|VMP_NEMVE
g20553	0.30134	0.00962633	NoEnrichment	sp|P31579|LCE_ORYLA
g2061	0.057831	0.000814308	NoEnrichment	sp|Q8VHN7|GPR98_MOUSE
g20613	1.08968	0.0494197	NoEnrichment	NA
g20637	-0.0799274	-0.0852007	NoEnrichment	sp|A2VDZ3|MEF2A_BOVIN
g2068	0.924299	-0.048463	NoEnrichment	NA
g20685	0.0930857	0.0596015	NoEnrichment	sp|P47032|PRY1_YEAST
g20686	-0.0595987	0.27376	NoEnrichment	NA
g20690	0.496103	-0.137998	NoEnrichment	sp|Q6TXF1|ARRD3_RAT
g20700	-0.120413	0.0481845	NoEnrichment	sp|Q7TPQ9|ARRD3_MOUSE
g20769	-0.350685	-0.0846117	NoEnrichment	sp|P78412|IRX6_HUMAN
g20774	0.375296	-0.114692	NoEnrichment	sp|Q55874|Y103_SYNY3
g20792	0.2282	0.278408	NoEnrichment	sp|Q8IVN8|SBSPO_HUMAN
g20826	0.328005	0.00186279	NoEnrichment	sp|Q2VLG6|C163A_CANLF
g20832	0.0346899	-0.0686121	NoEnrichment	sp|Q95218|DMBT1_RABIT
g20857	-0.222637	-0.000983743	NoEnrichment	sp|A6QLU6|AGRD1_BOVIN
g20911	-1.08914	-0.192177	NoEnrichment	sp|P23770|GATA2_XENLA
g20918	-0.126542	-0.32408	NoEnrichment	sp|P35360|OPSL_LIMPO
g20991	0.480539	0.540461	NoEnrichment	sp|P46088|GST_NOTSL
g20995	-0.301366	2.58734	NoEnrichment	sp|P46088|GST_NOTSL
g21006	-1.44435	-0.0515483	NoEnrichment	sp|Q9U518|ASPG_DIRIM
g21025	-0.0691621	-0.00273031	NoEnrichment	NA
g21055	0.0345071	-0.208515	NoEnrichment	sp|Q29RV1|PDIA4_BOVIN
g21056	-0.0275244	-0.0672397	NoEnrichment	sp|Q29RV1|PDIA4_BOVIN
g21065	0.131588	-0.0572037	NoEnrichment	sp|Q5R9A4|DNJB9_PONAB
g21066	0.826259	0.19055	NoEnrichment	NA
g21076	0.907342	0.0843889	NoEnrichment	sp|A4IIJ3|KIBRA_XENTR
g21088	-0.336922	0.0203325	NoEnrichment	sp|Q16720|AT2B3_HUMAN
g21095	0.0664886	0.0107515	NoEnrichment	sp|Q6IE82|JADE3_MOUSE
g2111	-0.242877	0.155548	NoEnrichment	sp|Q80VL3|PRIC3_MOUSE
g21163	-0.990347	0.0624584	NoEnrichment	NA
g21174	0.719575	0.133973	NoEnrichment	sp|P43368|CAN3_PIG
g21219	-0.438675	-0.884419	NoEnrichment	sp|Q90623|MYPT1_CHICK
g21247	-0.0694616	0.000331786	NoEnrichment	sp|A0A0R4IBK5|R213A_DANRE
g21270	0.813205	0.00749495	NoEnrichment	sp|Q0V7M1|KPSH1_BOVIN
g21488	0.144484	-0.00937347	NoEnrichment	sp|O57422|OPN4B_XENLA
g21491	0.880164	0.0177149	NoEnrichment	sp|P30974|TLR1_DROME
g21702	0.203362	0.00969653	NoEnrichment	sp|Q8CIW6|S26A6_MOUSE
g21713	0.254875	0.0123931	NoEnrichment	sp|Q8CIW6|S26A6_MOUSE
g21760	0.268078	0.0312231	NoEnrichment	sp|P55112|NAS4_CAEEL
g21761	3.01095	0.00202257	NoEnrichment	sp|Q9Y5R5|DMRT2_HUMAN
g21798	0.443999	-0.00661843	NoEnrichment	sp|Q8BGF8|S35D3_MOUSE
g2189	0.540124	-0.133179	NoEnrichment	NA
g2192	0.456572	-0.111371	NoEnrichment	sp|Q8TE12|LMX1A_HUMAN
g21976	0.266599	0.175417	NoEnrichment	sp|O95057|DIRA1_HUMAN
g2198	-0.945851	-1.74497	NoEnrichment	sp|Q8N8K9|K1958_HUMAN
g22025	-0.131574	-0.00364588	NoEnrichment	sp|Q75M08|PDI21_ORYSJ
g22058	-0.106425	0.00287483	NoEnrichment	sp|P10079|FBP1_STRPU
g22086	0.160669	0.00332419	NoEnrichment	sp|Q5XGS8|GTPB1_XENLA
g22087	0.355135	0.0190246	NoEnrichment	sp|Q5XGS8|GTPB1_XENLA
g22088	0.247778	-0.0101365	NoEnrichment	sp|D2XV59|GTPB1_RAT
g22100	-0.137414	0.0584778	NoEnrichment	sp|Q4KM30|DESI1_RAT
g22112	0.137032	-0.584832	NoEnrichment	sp|Q91Z92|B3GT6_MOUSE
g22114	1.36308	-0.813302	NoEnrichment	NA
g22132	0.104864	-0.0133715	NoEnrichment	NA
g22137	-0.845221	-0.000964629	NoEnrichment	sp|P50129|5HT2A_PIG
g22186	-0.414139	-0.0444889	NoEnrichment	sp|Q91175|ADA1A_ORYLA
g22197	0.385666	0.000348037	NoEnrichment	sp|P07805|DCOR_TRYBB
g22221	-0.273366	0.0226864	NoEnrichment	NA
g22226	0.0236341	-0.0318834	NoEnrichment	sp|P21369|PNCA_ECOLI
g22258	-0.0147896	0.19336	NoEnrichment	sp|Q62165|DAG1_MOUSE
g22286	0.150413	-0.138058	NoEnrichment	sp|B3VSC2|TSN9_SHEEP
g22317	0.747709	-0.384083	NoEnrichment	sp|Q0VCJ7|RERG_BOVIN
g22319	-0.35879	-0.17914	NoEnrichment	sp|Q7T163|KDIS_DANRE
g22348	-0.581281	0.0316434	NoEnrichment	NA
g22533	0.608683	0.480646	NoEnrichment	sp|Q9BQE3|TBA1C_HUMAN
g22555	-0.002052	0.267876	NoEnrichment	sp|P07942|LAMB1_HUMAN
g22557	0.12069	0.0421316	NoEnrichment	sp|Q61116|ZN235_MOUSE
g22585	0.674421	0.210078	NoEnrichment	sp|Q91Z46|DUS7_MOUSE
g22615	0.37656	-0.445351	NoEnrichment	sp|Q8HYJ7|FUT5_GORGO
g22655	0.132177	-0.0505227	NoEnrichment	sp|Q63690|BAX_RAT
g2266	-0.00573705	0.048069	NoEnrichment	NA
g22665	0.0402678	0.0289694	NoEnrichment	sp|Q9ES87|PRSS8_RAT
g22680	-0.0731534	0.00893181	NoEnrichment	sp|Q3E6S9|CNIF3_ARATH
g22718	0.0314631	0.162966	NoEnrichment	sp|P11845|IPP2_RABIT
g2273	-0.131042	-0.128722	NoEnrichment	NA
g22734	0.027663	0.0975495	NoEnrichment	sp|P11279|LAMP1_HUMAN
g2274	0.329014	-0.220448	NoEnrichment	NA
g22822	-1.25811	0.00228193	NoEnrichment	NA
g22852	-0.0866321	0.0109353	NoEnrichment	sp|Q5TAX3|TUT4_HUMAN
g22869	0.692024	-0.000740621	NoEnrichment	NA
g22879	-0.10648	-0.792292	NoEnrichment	sp|Q8WWF8|CAPSL_HUMAN
g2288	-0.290731	-0.0333582	NoEnrichment	NA
g22916	-0.108896	0.00432908	NoEnrichment	sp|P85857|GDF6A_DANRE
g22919	0.242177	0.00195705	NoEnrichment	sp|Q5SPC5|OTOF_DANRE
g22933	-0.320447	0.290902	NoEnrichment	sp|Q9NR82|KCNQ5_HUMAN
g22934	1.76681	0.58917	Head	NA
g22990	0.278297	0.0948492	NoEnrichment	sp|Q32PV0|GULP1_DANRE
g23047	-0.382357	-0.27464	NoEnrichment	sp|P97819|PLPL9_MOUSE
g23048	0.217968	-0.00460889	NoEnrichment	sp|P97570|PLPL9_RAT
g23069	-0.442577	-0.00407223	NoEnrichment	NA
g23088	0.00862947	0.074449	NoEnrichment	sp|A2AJ15|MA1B1_MOUSE
g23103	-0.592525	-0.0785129	NoEnrichment	NA
g23108	-0.258242	0.000544493	NoEnrichment	sp|Q6L9W6|B4GN3_HUMAN
g23109	0.491515	0.308757	NoEnrichment	NA
g23186	0.273319	0.00699822	NoEnrichment	NA
g23193	-0.0585088	0.00378405	NoEnrichment	sp|P19246|NFH_MOUSE
g23249	0.549912	0.158297	NoEnrichment	NA
g23252	0.608028	0.0527263	NoEnrichment	sp|P23508|CRCM_HUMAN
g23270	0.55385	0.149153	NoEnrichment	sp|Q7ZTV5|FSHR_CAIMO
g2328	-0.0573784	-0.0196605	NoEnrichment	sp|P54864|JUN_SERCA
g23304	0.323944	-0.00240772	NoEnrichment	sp|Q8CHN8|MASP1_RAT
g23347	-0.24014	0.00728273	NoEnrichment	sp|Q29243|DAG1_PIG
g23352	0.178905	0.0106449	NoEnrichment	NA
g23371	0.0258888	0.00128007	NoEnrichment	sp|Q9CYL5|GAPR1_MOUSE
g234	0.315975	1.44694	NoEnrichment	sp|P05933|CALM_SCHPO
g23416	0.653207	0.297477	NoEnrichment	sp|Q7YRZ9|MCL1_FELCA
g23418	-0.104552	-0.0448559	NoEnrichment	sp|Q99L28|RLP24_MOUSE
g23421	0.909788	-0.686861	NoEnrichment	sp|Q82P90|IABF_STRAW
g23429	0.0691121	-0.187915	NoEnrichment	sp|A3DEX6|RSGI5_CLOTH
g23571	0.526854	-0.0220169	NoEnrichment	NA
g23588	1.58369	0.874835	Head	sp|Q61382|TRAF4_MOUSE
g23600	0.180803	0.000426978	NoEnrichment	sp|E7FKV8|PK1L1_ORYLA
g23621	0.150239	0.105963	NoEnrichment	sp|Q9BX70|BTBD2_HUMAN
g23692	0.324245	0.0987066	NoEnrichment	sp|Q8VIJ8|NPRL3_MOUSE
g23720	0.619795	-0.174327	NoEnrichment	sp|P79702|FOS_CYPCA
g2385	-0.163371	-0.184189	NoEnrichment	sp|Q684P5|RPGP2_HUMAN
g23858	0.184284	0.000833738	NoEnrichment	sp|Q6A548|TERT_CANLF
g23859	1.19829	0.222953	Head	sp|P02640|VILI_CHICK
g23878	-0.110642	0.0422057	NoEnrichment	sp|Q7ZZC8|NEK9_XENLA
g23880	-0.102764	0.0134402	NoEnrichment	sp|Q8N129|CNPY4_HUMAN
g23916	-1.52507	0.161895	NoEnrichment	NA
g2398	-0.233981	-0.000775299	NoEnrichment	sp|D3YXG0|HMCN1_MOUSE
g24008	-0.0888274	-0.00211629	NoEnrichment	sp|P47033|PRY3_YEAST
g2402	-0.279864	-0.00179244	NoEnrichment	sp|Q9P2N4|ATS9_HUMAN
g24024	2.98125	0.131442	NoEnrichment	sp|Q91X58|ZFN2B_MOUSE
g24036	0.441434	-1.02286	NoEnrichment	NA
g24037	0.353199	-0.00217098	NoEnrichment	NA
g24039	-0.0315612	-0.00891473	NoEnrichment	sp|Q3TZM9|ALG11_MOUSE
g24114	0.15838	0.384602	NoEnrichment	sp|Q28FN6|OTX2_XENTR
g24126	0.888416	0.134777	NoEnrichment	sp|O42097|FOXA2_ORYLA
g24129	0.00647515	-0.0349067	NoEnrichment	sp|Q5RF84|UB2G2_PONAB
g24130	0.209968	-0.0582933	NoEnrichment	sp|Q80ZD3|S2611_MOUSE
g24147	-0.0243622	0.402892	NoEnrichment	NA
g24191	1.03546	0.875905	NoEnrichment	sp|Q28107|FA5_BOVIN
g24228	0.459183	-0.00888434	NoEnrichment	sp|Q6DFF6|KLH20_XENLA
g24241	0.864219	1.20745	NoEnrichment	sp|Q6DIP5|EMAL4_XENTR
g24257	0.158518	0.050356	NoEnrichment	NA
g24294	0.0708644	-0.0745202	NoEnrichment	sp|Q9JHJ7|TEST_MOUSE
g24307	-1.05793	0.00434233	NoEnrichment	sp|Q68ED2|GRM7_MOUSE
g24323	0.747233	0.00277216	NoEnrichment	NA
g24349	0.24851	0.328746	NoEnrichment	NA
g24356	-0.36589	-0.147993	NoEnrichment	NA
g24360	-0.0222874	-0.0156501	NoEnrichment	sp|Q7SXV9|CALUB_DANRE
g24398	-0.140072	0.00550668	NoEnrichment	sp|Q6INC8|VGLU1_XENLA
g2440	-0.0191551	0.0227634	NoEnrichment	NA
g24406	-0.53492	-0.113701	NoEnrichment	sp|P11362|FGFR1_HUMAN
g24476	-0.157868	-0.000312552	NoEnrichment	sp|P10079|FBP1_STRPU
g24483	0.946347	0.806815	Head	sp|P70211|DCC_MOUSE
g24547	0.129259	0.266663	NoEnrichment	sp|Q8WSF1|H33_TRIPS
g2461	-0.2006	-0.0106316	NoEnrichment	sp|Q90268|PAX2A_DANRE
g24677	-0.419623	0.0186181	NoEnrichment	sp|Q03014|HHEX_HUMAN
g24678	0.883394	0.103001	NoEnrichment	sp|Q04972|VIPA_SALTI
g24679	0.35282	0.0803536	NoEnrichment	sp|Q04973|VIPB_SALTI
g24716	0.120342	0.00370771	NoEnrichment	sp|O57457|E41L4_DANRE
g24777	-0.0826361	0.000835007	NoEnrichment	sp|Q7RTS6|OTOP2_HUMAN
g24822	-0.0160074	-0.142157	NoEnrichment	sp|P15253|CALR_RABIT
g24876	0.0540642	0.0473696	NoEnrichment	NA
g24883	0.524982	-0.263683	NoEnrichment	NA
g24903	-0.225754	0.0490758	NoEnrichment	sp|P29146|NECA_HYDVU
g24911	0.493276	-0.234645	NoEnrichment	NA
g24930	0.0547376	-0.0358622	NoEnrichment	sp|Q5SPH9|RT10_DANRE
g24936	-1.99144	0.146749	NoEnrichment	sp|Q54HW1|PSD10_DICDI
g24952	1.90995	0.524251	Head	sp|O15178|BRAC_HUMAN
g24983	-0.418527	0.18512	NoEnrichment	sp|O75132|ZBED4_HUMAN
g25021	-0.392368	0.0207887	NoEnrichment	sp|P97292|HRH2_MOUSE
g25044	0.842377	0.236087	NoEnrichment	NA
g25079	0.271593	0.288991	NoEnrichment	NA
g25080	0.347761	0.342063	NoEnrichment	NA
g25127	-0.937896	-0.0923103	NoEnrichment	sp|A8TSS9|DMTA2_MONAL
g25137	-0.0344899	0.0254267	NoEnrichment	sp|Q28620|NPT2A_RABIT
g25176	0.643823	0.167207	NoEnrichment	sp|Q5RBA5|SQSTM_PONAB
g25238	-0.071503	0.0460433	NoEnrichment	sp|Q08D62|MAEL_XENTR
g25321	0.589983	0.0367295	NoEnrichment	NA
g25356	0.320731	-0.192955	NoEnrichment	sp|P35555|FBN1_HUMAN
g25362	0.415371	-0.00482181	NoEnrichment	sp|O88281|MEGF6_RAT
g25364	-0.184304	0.050143	NoEnrichment	sp|P41041|CALM_PNECA
g25416	-0.127193	0.0189465	NoEnrichment	sp|P24802|PLOD1_CHICK
g25532	-0.359485	-0.0526146	NoEnrichment	sp|O95980|RECK_HUMAN
g25539	0.215058	0.0241322	NoEnrichment	sp|Q0V8T4|CTP5C_RAT
g25556	0.488806	0.162561	NoEnrichment	sp|A7E2S9|A30BL_HUMAN
g25557	1.62759	-0.00727184	NoEnrichment	sp|Q9H1Y3|OPN3_HUMAN
g25581	0.0904265	-0.0270696	NoEnrichment	sp|Q2KJG3|SYNC_BOVIN
g25724	-0.109916	0.0696347	NoEnrichment	sp|P49354|FNTA_HUMAN
g25747	-0.11149	-0.0169009	NoEnrichment	sp|Q99715|COCA1_HUMAN
g25768	0.231973	0.00811587	NoEnrichment	sp|Q5R5F8|PANK4_PONAB
g25771	-0.405363	0.108113	NoEnrichment	sp|P38977|ANTA_HYDVU
g25773	-0.2891	0.0695772	NoEnrichment	sp|P38977|ANTA_HYDVU
g258	0.00308202	0.397877	NoEnrichment	sp|Q24UI6|IF2_DESHY
g25824	1.16323	0.0533126	NoEnrichment	NA
g25854	-0.774448	0.000840451	NoEnrichment	sp|Q9H1Y3|OPN3_HUMAN
g25893	2.35188	0.239354	Head	NA
g25927	0.124111	0.00616229	NoEnrichment	NA
g26061	0.629244	0.00465684	NoEnrichment	sp|P48740|MASP1_HUMAN
g2608	0.00442008	0.408932	NoEnrichment	sp|Q7SZ59|RASLC_DANRE
g26083	-0.609575	-0.00404598	NoEnrichment	sp|P51399|LOX5_MESAU
g2609	-0.0975164	0.0824919	NoEnrichment	sp|O93530|WRN_XENLA
g26213	-0.423859	0.0703521	NoEnrichment	sp|O75486|SUPT3_HUMAN
g26244	0.311514	-0.00628906	NoEnrichment	sp|Q04637|IF4G1_HUMAN
g26250	0.0924565	0.036712	NoEnrichment	NA
g26294	0.240521	0.286906	NoEnrichment	sp|Q9H0J9|PAR12_HUMAN
g26299	0.0472541	0.00600545	NoEnrichment	sp|Q9NR09|BIRC6_HUMAN
g26375	0.142511	0.0148594	NoEnrichment	sp|Q6NWZ9|CDO1_DANRE
g26569	-0.0314838	-0.0576932	NoEnrichment	sp|Q96UM2|LAC3_BOTFU
g26570	0.102564	-0.0382935	NoEnrichment	sp|Q96WM9|LAC2_BOTFU
g26573	0.104834	-0.00680177	NoEnrichment	sp|Q96WM9|LAC2_BOTFU
g26583	-0.0972327	0.0132036	NoEnrichment	sp|Q68CZ2|TENS3_HUMAN
g26620	0.337753	0.253442	NoEnrichment	sp|O75366|AVIL_HUMAN
g26703	0.105168	0.0918764	NoEnrichment	NA
g26764	-0.520541	0.244537	NoEnrichment	NA
g26784	0.662945	-0.115513	NoEnrichment	sp|C9D7R3|VMPA3_LOXIN
g26787	0.0972509	-0.137071	NoEnrichment	NA
g26797	-0.0120163	-0.0926412	NoEnrichment	sp|Q03326|OXIR_STRAT
g26798	0.528112	-0.0259923	NoEnrichment	sp|P35320|OXIR_STRLI
g26799	0.261224	-0.0343579	NoEnrichment	sp|Q03326|OXIR_STRAT
g26809	0.266572	0.0740501	NoEnrichment	NA
g26840	1.20099	0.338951	Head	sp|Q566L4|ZN703_XENTR
g26848	0.290229	0.0632622	NoEnrichment	NA
g26858	0.351433	-0.0024788	NoEnrichment	sp|P42289|DRD1_XENLA
g2686	0.636231	0.0455849	NoEnrichment	sp|P35317|AT1A_HYDVU
g26877	0.142898	-0.11134	NoEnrichment	sp|Q9UBI9|HDC_HUMAN
g26884	-0.100157	-0.268939	NoEnrichment	sp|Q6DN14|MCTP1_HUMAN
g2689	-0.273269	0.0305741	NoEnrichment	sp|Q800K6|TOB1A_XENLA
g26936	0.02617	0.00231837	NoEnrichment	sp|P07207|NOTCH_DROME
g270	0.420092	-0.145687	NoEnrichment	sp|P86925|RLGM2_TRYB2
g2700	-0.04347	0.849115	NoEnrichment	sp|P35317|AT1A_HYDVU
g27008	0.73534	-0.051254	NoEnrichment	sp|Q9WV54|ASAH1_MOUSE
g27009	0.216732	0.0438738	NoEnrichment	sp|A3KQV2|BROX_DANRE
g27082	0.407168	0.52277	NoEnrichment	sp|Q80U40|RIMB2_MOUSE
g27138	-0.6673	0.227469	NoEnrichment	sp|O77775|NCF2_BOVIN
g27164	0.220449	0.160032	NoEnrichment	sp|P21333|FLNA_HUMAN
g27170	0.153794	0.0789158	NoEnrichment	sp|Q68EQ1|GMPPB_XENTR
g27171	0.158651	0.0564212	NoEnrichment	sp|Q7JZB4|GMPPB_DROME
g27236	0.409098	0.0579195	NoEnrichment	sp|P23950|TISB_MOUSE
g27266	-0.0547757	0.0591329	NoEnrichment	sp|Q96CX6|LRC58_HUMAN
g27312	-0.717751	0.00430252	NoEnrichment	NA
g27334	0.716227	1.20888	NoEnrichment	sp|Q04831|GLNA_PANAR
g27351	-0.104171	-0.00507436	NoEnrichment	sp|Q86A72|Y4781_DICDI
g27364	0.831377	0.130542	NoEnrichment	sp|P91943|PANG1_DROME
g2738	-0.00128456	-0.0155136	NoEnrichment	sp|Q6P5D8|SMHD1_MOUSE
g27455	0.218382	0.00435828	NoEnrichment	sp|P45723|PLC_STAAE
g27456	0.0620294	-0.130655	NoEnrichment	sp|Q18246|RAP1_CAEEL
g27534	0.314659	0.0451555	NoEnrichment	NA
g27596	-0.900663	-0.0943476	NoEnrichment	NA
g27612	0.351037	-0.0184917	NoEnrichment	sp|Q8WVB3|HEXDC_HUMAN
g2762	-0.111453	-0.000834556	NoEnrichment	NA
g27625	-0.281096	0.00491041	NoEnrichment	sp|Q8N9L1|ZIC4_HUMAN
g27641	-0.285356	0.0351962	NoEnrichment	sp|Q9D1F4|AKTS1_MOUSE
g27757	1.55211	-0.158326	NoEnrichment	NA
g27772	0.166829	0.0325962	NoEnrichment	sp|Q24040|BGB_DROME
g27778	1.27793	1.69776	Head	sp|Q03427|LAMC_DROME
g2784	-0.0581564	0.0101107	NoEnrichment	NA
g27852	0.0578707	0.0483376	NoEnrichment	sp|O75096|LRP4_HUMAN
g2790	1.17446	0.00105448	NoEnrichment	sp|O43422|P52K_HUMAN
g27920	0.221178	0.0306161	NoEnrichment	sp|Q9ESD1|PRSS8_MOUSE
g27959	-0.0137578	0.00745462	NoEnrichment	sp|Q63472|KCNH1_RAT
g28009	0.0334247	0.0400282	NoEnrichment	sp|Q9VCE9|UBS3A_DROME
g28042	-1.08867	0.159439	NoEnrichment	sp|Q67FQ3|ARHB_XENLA
g28055	1.04288	-0.0441025	NoEnrichment	NA
g2806	-0.234078	0.0108998	NoEnrichment	sp|P97739|ECE1_CAVPO
g28064	2.3691	0.793345	Head	sp|P17553|WNT3_MOUSE
g28068	-0.0755628	0.00220675	NoEnrichment	NA
g28083	0.110352	1.27117e-05	NoEnrichment	sp|Q6DN14|MCTP1_HUMAN
g2810	0.405088	-0.0269926	NoEnrichment	NA
g28117	-0.421215	0.651277	NoEnrichment	sp|A6NMZ7|CO6A6_HUMAN
g28136	0.188297	0.0114231	NoEnrichment	sp|Q9NQW6|ANLN_HUMAN
g28166	0.974032	-0.0474908	NoEnrichment	sp|Q8W257|PFI_PTIFI
g28168	-0.164666	0.01335	NoEnrichment	sp|E7FAM5|LIN41_DANRE
g28232	-0.0958814	-0.437927	NoEnrichment	NA
g28253	-0.0769679	0.107725	NoEnrichment	NA
g28262	-0.163865	0.869682	NoEnrichment	sp|P41221|WNT5A_HUMAN
g28273	0.899039	-0.00731736	NoEnrichment	NA
g2830	0.520509	0.215816	NoEnrichment	sp|P10090|WHITE_DROME
g28301	0.0634602	0.0374866	NoEnrichment	sp|P22897|MRC1_HUMAN
g28374	-0.199484	0.239608	NoEnrichment	NA
g28448	0.640717	0.115265	NoEnrichment	NA
g28449	-1.01017	-0.540491	NoEnrichment	sp|P32028|FD4_DROME
g28498	-0.212062	-0.00318364	NoEnrichment	sp|Q78KK3|S22AI_MOUSE
g28617	-0.154489	0.314548	NoEnrichment	sp|Q86SS6|SYT9_HUMAN
g2866	0.185786	0.0023201	NoEnrichment	NA
g28706	0.0770466	0.0168234	NoEnrichment	sp|Q8VDL4|ADPGK_MOUSE
g28716	1.31432	0.0794687	NoEnrichment	NA
g28717	1.66563	0.020104	NoEnrichment	NA
g28783	0.975874	-0.021962	NoEnrichment	NA
g28784	0.798299	-0.00615018	NoEnrichment	NA
g28785	1.09545	-0.104629	NoEnrichment	NA
g28786	0.0386441	0.27294	NoEnrichment	sp|P35285|RB22A_MOUSE
g28791	2.05242	0.013767	NoEnrichment	NA
g28800	0.0132886	0.00259672	NoEnrichment	sp|O60494|CUBN_HUMAN
g28828	0.0533323	-0.131064	NoEnrichment	sp|Q8WXR4|MYO3B_HUMAN
g28839	-0.509531	0.00568745	NoEnrichment	sp|Q8IY50|S35F3_HUMAN
g28899	-0.143725	0.202554	NoEnrichment	sp|Q13057|COASY_HUMAN
g28986	-0.175596	0.00101823	NoEnrichment	NA
g28992	0.478175	0.886705	NoEnrichment	sp|O76360|EGL4_CAEEL
g28994	-0.217312	-0.00166165	NoEnrichment	sp|P02469|LAMB1_MOUSE
g2903	0.0870808	0.108219	NoEnrichment	sp|Q6GMK0|MGT4B_DANRE
g29030	1.69001	0.210528	NoEnrichment	sp|P62775|MTPN_RAT
g29039	0.40224	0.0275375	NoEnrichment	sp|Q64701|RBL1_MOUSE
g2908	0.0451855	-0.000884462	NoEnrichment	sp|Q6PEH9|S39AA_DANRE
g29090	0.0696996	0.125489	NoEnrichment	NA
g29169	-0.3927	0.00162571	NoEnrichment	NA
g292	0.264009	0.0156165	NoEnrichment	NA
g29211	0.170176	-0.151167	NoEnrichment	sp|P50904|RASA1_RAT
g29234	-0.687117	0.116801	NoEnrichment	sp|Q28E95|SH3R1_XENTR
g29257	-0.25188	0.0624024	NoEnrichment	sp|Q8SQ72|SGCG_CANLF
g29262	0.220608	-0.00282404	NoEnrichment	sp|Q8WP23|BOLL_MACFA
g29266	0.335973	-0.304537	NoEnrichment	sp|P51830|ADCY9_MOUSE
g29308	0.827386	0.00214771	NoEnrichment	sp|Q4L235|ACSF4_HUMAN
g29309	0.458592	0.203351	NoEnrichment	sp|Q8TB61|S35B2_HUMAN
g29352	1.04783	0.0161812	NoEnrichment	NA
g29383	0.4932	0.170201	NoEnrichment	sp|Q7T3Q7|OPSO_RUTRU
g29412	-1.02902	0.107268	NoEnrichment	sp|P97739|ECE1_CAVPO
g2943	-0.189527	-0.131023	NoEnrichment	sp|Q62908|CSRP2_RAT
g2944	0.0251163	-0.0332599	NoEnrichment	sp|A2VDD2|TC1DB_XENLA
g29448	0.415579	0.458197	NoEnrichment	sp|Q24799|MYPH_ECHGR
g29454	0.122166	0.29971	NoEnrichment	sp|P72745|Y1101_SYNY3
g29473	-0.0493051	0.434894	NoEnrichment	sp|Q6XL41|RHCG_CHICK
g29481	0.307004	0.0657618	NoEnrichment	sp|Q8BTN6|LENG9_MOUSE
g29487	0.352488	0.28119	NoEnrichment	sp|A6QNS3|ABR_BOVIN
g29497	-0.355037	0.0528142	NoEnrichment	sp|Q68FD7|FNIP1_MOUSE
g29527	0.00117039	0.0484074	NoEnrichment	sp|Q8VE97|SRSF4_MOUSE
g2954	1.72757	-0.141547	NoEnrichment	sp|P32738|CLAT_RAT
g29540	-0.0617713	0.423353	NoEnrichment	sp|P07314|GGT1_RAT
g2955	-0.114733	-0.00141763	NoEnrichment	NA
g29567	0.558205	-0.213906	NoEnrichment	sp|Q9VUL9|FUCTA_DROME
g2959	-0.15036	0.00230949	NoEnrichment	NA
g29616	-0.0651644	0.00102553	NoEnrichment	sp|D3YXG0|HMCN1_MOUSE
g29750	3.64541	1.58866	NoEnrichment	sp|Q98SN7|WNT2B_CHICK
g29781	0.589733	-0.0112509	NoEnrichment	sp|Q05AS8|DVL2_XENTR
g29786	-0.171904	-0.112896	NoEnrichment	sp|Q8IXB1|DJC10_HUMAN
g29832	0.0382689	0.114618	NoEnrichment	sp|P68037|UB2L3_MOUSE
g29837	0.158245	-0.365066	NoEnrichment	NA
g2984	0.0934153	0.0242167	NoEnrichment	NA
g29966	0.406769	0.00718142	NoEnrichment	sp|P02269|H2A_ASTRU
g29976	0.316433	-0.315084	NoEnrichment	sp|Q8WWL2|SPIR2_HUMAN
g29986	0.160453	-0.000760031	NoEnrichment	sp|Q5T011|SZT2_HUMAN
g30081	0.0961245	0.00507125	NoEnrichment	sp|Q32MH5|F214A_HUMAN
g30174	-0.111254	0.00208328	NoEnrichment	sp|Q0EEE2|PTHD3_MOUSE
g30200	-0.0645457	-0.0105685	NoEnrichment	sp|P23978|SC6A1_RAT
g30219	0.146294	0.170671	NoEnrichment	sp|Q9PVY8|FXC2B_XENLA
g30222	0.0394867	-0.0574433	NoEnrichment	NA
g30252	0.920437	0.697963	Head	NA
g30307	0.293022	0.013977	NoEnrichment	NA
g30359	-0.0917837	0.000919783	NoEnrichment	sp|P29558|RBMS1_HUMAN
g30386	1.04918	0.184634	NoEnrichment	sp|Q28ET4|VENT1_XENTR
g30398	0.59579	0.340421	NoEnrichment	sp|P02510|CRYAB_BOVIN
g30406	-0.436896	0.128093	NoEnrichment	NA
g30409	1.48982	-0.0831664	NoEnrichment	sp|P48442|CASR_RAT
g30442	1.81611	0.492628	Head	NA
g30537	0.127217	-0.381977	NoEnrichment	sp|Q86YB8|ERO1B_HUMAN
g30573	1.3382	0.0885533	NoEnrichment	sp|A0KTG8|HLDE_SHESA
g30584	0.123487	-0.00548624	NoEnrichment	sp|Q3UVC0|KSR2_MOUSE
g30605	-0.305652	0.031633	NoEnrichment	sp|Q92179|CHST3_CHICK
g30630	0.0195127	-0.000398043	NoEnrichment	sp|P42674|BP10_PARLI
g30639	0.056826	0.0202348	NoEnrichment	sp|Q20191|NAS13_CAEEL
g30647	0.242225	-0.000740131	NoEnrichment	sp|P55115|NAS15_CAEEL
g30648	0.15267	-0.00810597	NoEnrichment	sp|P55112|NAS4_CAEEL
g30674	-0.841078	-1.37111	NoEnrichment	sp|B3STU3|CHAC1_RAT
g30700	0.330154	-0.0692351	NoEnrichment	sp|Q9BY84|DUS16_HUMAN
g30759	0.134279	-0.0214885	NoEnrichment	sp|Q9CQ52|CEL3B_MOUSE
g30762	-0.034257	0.0118684	NoEnrichment	sp|Q01085|TIAR_HUMAN
g30826	-0.363429	0.00870277	NoEnrichment	NA
g30865	0.800716	0.604226	NoEnrichment	sp|Q9VZZ4|PXDN_DROME
g30893	0.221025	0.208287	NoEnrichment	sp|Q9LMG7|PPA2_ARATH
g30894	-0.501351	-0.0448195	NoEnrichment	sp|Q86PM4|FGFR_HYDVU
g30938	-0.0123821	-0.0235909	NoEnrichment	sp|Q9UJT9|FBXL7_HUMAN
g30956	-0.242604	-0.00727509	NoEnrichment	sp|E7FAM5|LIN41_DANRE
g3099	-0.149316	0.000775875	NoEnrichment	sp|Q9QYS2|GRM3_MOUSE
g31005	0.0481961	0.23384	NoEnrichment	NA
g31060	-0.0622602	0.00663144	NoEnrichment	sp|Q8NCL4|GALT6_HUMAN
g31061	0.0471734	-0.0298397	NoEnrichment	sp|Q6WV17|GALT5_DROME
g31085	-0.0781795	0.00145008	NoEnrichment	NA
g31086	-0.00847076	0.00399193	NoEnrichment	NA
g31098	0.0997162	-0.0614243	NoEnrichment	sp|P97858|S35B1_MOUSE
g3121	0.0674528	0.141231	NoEnrichment	sp|Q3ZBG9|PLS2_BOVIN
g31252	-0.181155	-0.0105231	NoEnrichment	sp|Q27312|NADA_APLKU
g31283	0.423698	-0.103948	NoEnrichment	sp|Q9BT88|SYT11_HUMAN
g31352	-0.153994	-0.218926	NoEnrichment	sp|Q9Z0J1|RECK_MOUSE
g31440	-0.898173	-0.0543301	NoEnrichment	sp|P25931|NPYR_DROME
g31502	-0.0440936	-0.742029	NoEnrichment	NA
g31631	0.501753	0.16028	NoEnrichment	sp|Q9BRS8|LARP6_HUMAN
g31632	-0.129414	0.258607	NoEnrichment	sp|Q8AVU4|HES1B_XENLA
g31719	-0.408693	1.32692	NoEnrichment	NA
g31723	-0.0821888	-0.196235	NoEnrichment	sp|P43307|SSRA_HUMAN
g31735	0.00949818	-0.0660291	NoEnrichment	sp|O57321|EAA1_AMBTI
g31801	0.013922	0.00705494	NoEnrichment	sp|Q9I8D1|MYO6_CHICK
g31900	-0.18809	0.0109017	NoEnrichment	sp|P23327|SRCH_HUMAN
g32018	0.101101	0.0500514	NoEnrichment	sp|Q24547|STX1A_DROME
g32151	0.292859	0.0396639	NoEnrichment	sp|Q8K157|GALM_MOUSE
g32158	0.602563	-1.201	NoEnrichment	sp|P51399|LOX5_MESAU
g32199	-0.0406632	-0.0114248	NoEnrichment	sp|P06865|HEXA_HUMAN
g3220	-0.0317101	0.034699	NoEnrichment	sp|Q9TWL9|COMA_CONMA
g32238	-0.587956	-0.247008	NoEnrichment	NA
g32263	0.144102	0.0350501	NoEnrichment	sp|Q9XTL9|PYG_DROME
g32290	-0.0330396	0.0281105	NoEnrichment	sp|Q96PN7|TREF1_HUMAN
g32331	0.467348	0.0175191	NoEnrichment	sp|Q3SZN3|OMA1_BOVIN
g32332	-0.316554	-0.00439037	NoEnrichment	sp|A1L1V4|LOL2B_DANRE
g32336	0.908792	0.00702564	NoEnrichment	sp|Q9H5L6|THAP9_HUMAN
g32459	0.513456	-0.000432923	NoEnrichment	NA
g32552	0.388969	0.307145	NoEnrichment	sp|Q1LYG0|SPD2A_DANRE
g32559	-0.74112	0.295195	NoEnrichment	NA
g32592	-0.19497	-0.0145906	NoEnrichment	sp|O02228|SC5A7_CAEEL
g32625	-0.0606104	0.0125311	NoEnrichment	sp|Q539E5|APX1_HYDVD
g32753	0.269907	-0.0424557	NoEnrichment	NA
g32789	-0.0183857	0.00882861	NoEnrichment	sp|Q2PZL6|FAT4_MOUSE
g32882	-0.122046	-0.030681	NoEnrichment	sp|O00222|GRM8_HUMAN
g32887	-0.23373	0.0627612	NoEnrichment	NA
g32919	-0.488006	-0.00637304	NoEnrichment	NA
g32935	0.0125315	-0.00403439	NoEnrichment	sp|Q80ZF8|AGRB3_MOUSE
g32982	-0.0618249	-0.12488	NoEnrichment	sp|Q5R6T1|PDIA6_PONAB
g32988	-0.112841	-0.00677032	NoEnrichment	sp|Q9VQX4|PNCB_DROME
g33141	0.450567	0.00896972	NoEnrichment	sp|Q9LHQ6|OCT4_ARATH
g33146	0.207719	0.0477616	NoEnrichment	sp|O75751|S22A3_HUMAN
g33185	-0.0944137	0.00856512	NoEnrichment	sp|Q7Z442|PK1L2_HUMAN
g33186	0.598009	0.00258615	NoEnrichment	sp|H2LRU7|PKD2_ORYLA
g33240	-0.0229582	-0.0164896	NoEnrichment	NA
g33251	0.721554	0.163491	NoEnrichment	sp|Q9ZNS4|PRB1_ARATH
g33271	-0.370963	0.506914	NoEnrichment	NA
g33275	0.14894	-0.000485233	NoEnrichment	sp|Q8VCK5|KLH20_MOUSE
g33278	-0.0130267	-0.00839223	NoEnrichment	sp|Q6PHE8|CC124_DANRE
g33324	0.445755	-0.0916943	NoEnrichment	NA
g3337	0.119444	0.0152322	NoEnrichment	sp|Q8NFA0|UBP32_HUMAN
g33373	7.83676	0.965675	Head	sp|P56706|WNT7B_HUMAN
g33396	0.109266	-0.243619	NoEnrichment	sp|Q28EM7|OTX5_XENTR
g33422	3.202	0.51786	Head	sp|Q62445|SP4_MOUSE
g33450	-0.373629	0.00204694	NoEnrichment	sp|A6QNK1|G3ST1_BOVIN
g33457	-0.113897	-0.190689	NoEnrichment	NA
g33477	-0.0246955	-0.41693	NoEnrichment	sp|Q24799|MYPH_ECHGR
g33493	0.0415761	-0.00843737	NoEnrichment	sp|B3LYS5|FOXO_DROAN
g33496	0.0039836	-0.198934	NoEnrichment	sp|Q9QX47|SON_MOUSE
g33497	-0.0848645	-0.305245	NoEnrichment	sp|Q01149|CO1A2_MOUSE
g33581	0.934997	-0.0178746	NoEnrichment	NA
g33605	0.184132	-0.00711804	NoEnrichment	sp|Q9VAS7|INX3_DROME
g33606	-0.376518	6.55473e-05	NoEnrichment	sp|Q9VAS7|INX3_DROME
g33633	-0.178295	-0.00612116	NoEnrichment	NA
g33643	0.277828	0.0939504	NoEnrichment	NA
g33656	-0.0462966	0.0452091	NoEnrichment	sp|Q553X7|GALE_DICDI
g33661	0.961984	-0.730129	NoEnrichment	sp|Q5R733|CPEB1_PONAB
g33686	-0.152534	0.166577	NoEnrichment	NA
g33693	-0.253944	0.188331	NoEnrichment	sp|P18428|LBP_HUMAN
g33728	0.282133	0.0469874	NoEnrichment	sp|Q01433|AMPD2_HUMAN
g33739	-0.069304	-0.00518803	NoEnrichment	sp|Q8BQM9|MD12L_MOUSE
g33749	0.00424779	-0.228911	NoEnrichment	sp|G5EGQ6|TEN1_CAEEL
g33757	0.061307	0.247246	NoEnrichment	NA
g33803	-1.06935	0.000680199	NoEnrichment	NA
g3411	-0.294645	0.00760189	NoEnrichment	NA
g3419	0.13531	-0.151517	NoEnrichment	sp|Q9VAI0|GNA1_DROME
g3460	-0.236525	0.0012468	NoEnrichment	sp|P55112|NAS4_CAEEL
g3553	0.706477	0.769453	Head	sp|A0LMC1|PHNX_SYNFM
g3650	0.649487	0.00661012	NoEnrichment	sp|Q8BGD4|SO4C1_MOUSE
g3660	0.818502	-1.81888	NoEnrichment	NA
g370	-0.118792	0.00239236	NoEnrichment	sp|Q68US5|EVA1C_PANTR
g3709	0.156428	-2.60536	NoEnrichment	NA
g3710	0.545056	-1.31505	NoEnrichment	sp|P38977|ANTA_HYDVU
g3756	-0.102053	0.0771362	NoEnrichment	sp|Q5RDQ3|AMERL_PONAB
g3847	-0.992512	0.64451	NoEnrichment	sp|A4QNP7|DMTA2_XENTR
g3893	0.46921	-0.543172	NoEnrichment	sp|Q8GXG1|ASPGB_ARATH
g3899	0.0621096	0.132915	NoEnrichment	sp|Q16629|SRSF7_HUMAN
g3966	-0.0652814	0.0303138	NoEnrichment	sp|Q38SD2|LRRK1_HUMAN
g3974	0.27106	0.0390482	NoEnrichment	sp|Q6S5C2|GNPTG_MOUSE
g3976	-0.0252638	-0.278538	NoEnrichment	NA
g4000	-0.428845	0.142687	NoEnrichment	sp|Q6CA53|APT_YARLI
g4003	0.152428	-0.597505	NoEnrichment	sp|Q63475|PTPR2_RAT
g4015	-0.480403	0.466354	NoEnrichment	NA
g4024	1.3051	0.00925473	NoEnrichment	NA
g4061	-0.214598	0.252064	NoEnrichment	sp|P47032|PRY1_YEAST
g4174	0.345768	0.0738447	NoEnrichment	sp|Q5F4B2|SWP70_CHICK
g4303	-0.0771647	0.25086	NoEnrichment	sp|Q5VV41|ARHGG_HUMAN
g4304	0.0321985	0.0934092	NoEnrichment	sp|Q04771|ACVR1_HUMAN
g4318	0.0913603	-0.0189455	NoEnrichment	NA
g4323	0.971427	-0.285549	NoEnrichment	NA
g4324	1.1986	-0.107891	NoEnrichment	sp|P22274|ARF_CANAL
g433	-0.137356	-0.516435	NoEnrichment	sp|Q9WV48|SHAN1_RAT
g4386	-0.293794	0.0341905	NoEnrichment	NA
g4389	0.613227	0.00531375	NoEnrichment	sp|B3EWZ3|CADN_ACRMI
g44	-0.146753	0.277091	NoEnrichment	sp|Q86WA9|S2611_HUMAN
g4402	0.903587	0.00236131	NoEnrichment	sp|B3EWZ3|CADN_ACRMI
g4403	0.48986	-0.00738698	NoEnrichment	sp|B3EWZ3|CADN_ACRMI
g4409	-0.355939	-0.161205	NoEnrichment	sp|P9WKB9|Y1760_MYCTU
g4469	2.74073	0.00240216	NoEnrichment	NA
g4475	0.0933831	0.503498	NoEnrichment	NA
g4537	0.0434651	0.00309365	NoEnrichment	sp|P20585|MSH3_HUMAN
g4584	-0.123492	0.679538	NoEnrichment	NA
g46	0.136141	0.0464229	NoEnrichment	sp|Q86WA9|S2611_HUMAN
g4679	-0.365234	0.159346	NoEnrichment	sp|Q7U6F4|RIMK_SYNPX
g4713	0.394199	-0.0961109	NoEnrichment	sp|Q9ULH7|MKL2_HUMAN
g4715	1.2597	-0.337425	NoEnrichment	NA
g4765	-0.10496	-0.00627264	NoEnrichment	sp|P50430|ARSB_RAT
g4769	-0.157145	0.251393	NoEnrichment	sp|Q5M8U1|ELOV5_XENTR
g478	-0.083418	-0.215914	NoEnrichment	NA
g4815	0.453131	0.0519259	NoEnrichment	sp|Q9VW26|OAT_DROME
g4856	-0.154505	0.0750052	NoEnrichment	sp|Q9ESM0|IP6K1_RAT
g4917	-1.21194	-0.942749	NoEnrichment	sp|P25723|TLD_DROME
g4921	-0.134379	0.0199564	NoEnrichment	NA
g4922	0.185485	0.30886	NoEnrichment	sp|D3ZHV2|MACF1_RAT
g5003	0.26092	0.00839238	NoEnrichment	sp|Q9H4G4|GAPR1_HUMAN
g5035	-0.196559	0.0164832	NoEnrichment	NA
g5051	0.0735923	-0.109275	NoEnrichment	sp|Q5RJW5|IRS2B_XENLA
g507	0.0569038	-0.0514155	NoEnrichment	sp|P48430|SOX2_CHICK
g5112	0.0305381	-0.010697	NoEnrichment	sp|A0A0R4IBK5|R213A_DANRE
g5130	-0.0402684	0.0192551	NoEnrichment	sp|Q8TB72|PUM2_HUMAN
g5147	1.47525	0.194972	Head	NA
g5180	-0.0705741	0.194262	NoEnrichment	NA
g5217	0.0558849	-0.000588007	NoEnrichment	NA
g5218	0.181363	0.069547	NoEnrichment	sp|Q9TWL9|COMA_CONMA
g5403	0.663824	0.0097251	NoEnrichment	sp|Q76KP1|B4GN4_HUMAN
g5410	0.770497	0.108068	NoEnrichment	NA
g5411	2.3687	-0.38103	NoEnrichment	NA
g5455	1.18098	-0.484995	NoEnrichment	NA
g5459	-0.469361	-0.00639088	NoEnrichment	NA
g5466	-0.109047	-0.0118737	NoEnrichment	sp|Q9GNN8|CTXA_CARAL
g5483	-0.120099	-0.000116031	NoEnrichment	sp|Q9GNN8|CTXA_CARAL
g5525	0.364889	0.0493017	NoEnrichment	sp|P11308|ERG_HUMAN
g5530	-0.0432944	-0.123222	NoEnrichment	sp|Q27968|DNJC3_BOVIN
g5621	1.37469	0.059734	NoEnrichment	sp|Q9W751|PITX1_XENLA
g564	-0.695032	0.0305821	NoEnrichment	sp|Q35101|COX1_METSE
g5660	-0.354551	-0.00240857	NoEnrichment	sp|A8TX70|CO6A5_HUMAN
g5731	0.126612	0.0531622	NoEnrichment	sp|E1BE02|E2F7_BOVIN
g5735	-0.930719	0.434394	NoEnrichment	sp|O54834|RHG06_MOUSE
g5757	0.0181294	0.0318515	NoEnrichment	sp|P32794|AFG2_YEAST
g5758	0.200661	-0.00598645	NoEnrichment	NA
g5880	-0.159164	0.00469191	NoEnrichment	NA
g5882	0.582678	-0.562714	NoEnrichment	sp|Q9PVW8|SAL_SILAS
g5883	0.106022	-0.0265654	NoEnrichment	sp|Q9PVW8|SAL_SILAS
g5947	0.246407	0.0902199	NoEnrichment	sp|Q626N3|TM151_CAEBR
g595	-0.0874416	-0.265814	NoEnrichment	sp|Q9BGI2|PRDX4_BOVIN
g5988	0.0738647	0.120484	NoEnrichment	sp|P75820|AMID_ECOLI
g5995	0.490302	0.181992	NoEnrichment	sp|O08605|MKNK1_MOUSE
g604	-0.131974	-0.00528596	NoEnrichment	NA
g6067	0.525988	-1.09993	NoEnrichment	NA
g6131	1.1692	-0.957656	NoEnrichment	sp|O73853|CP17A_ICTPU
g6164	0.550538	0.00639463	NoEnrichment	sp|Q9UHC6|CNTP2_HUMAN
g6167	-0.266276	0.456808	NoEnrichment	sp|Q8BH04|PCKGM_MOUSE
g6182	1.10969	0.00863208	NoEnrichment	NA
g6256	0.936703	-0.195964	NoEnrichment	NA
g6282	0.018034	0.834813	NoEnrichment	NA
g6320	0.193258	0.370392	NoEnrichment	sp|P35317|AT1A_HYDVU
g6351	-0.0775791	0.0258089	NoEnrichment	sp|Q9P2E2|KIF17_HUMAN
g637	-0.264351	0.00183313	NoEnrichment	sp|Q54LN4|GGHA_DICDI
g6387	0.157064	-0.011517	NoEnrichment	sp|P08183|MDR1_HUMAN
g6403	0.620069	0.130636	NoEnrichment	NA
g6418	0.800728	0.703274	Head	sp|Q05187|TGMH_TACTR
g6466	-0.129778	0.137906	NoEnrichment	sp|A6QNS3|ABR_BOVIN
g6623	-0.361112	-0.00410275	NoEnrichment	sp|Q32KJ8|ARSI_RAT
g6624	-0.245788	-0.00476351	NoEnrichment	NA
g6652	0.0594065	0.161247	NoEnrichment	sp|O14672|ADA10_HUMAN
g6653	0.0884369	0.11723	NoEnrichment	sp|Q10741|ADA10_BOVIN
g6659	0.562504	0.00354631	NoEnrichment	sp|Q8HXX6|SAP3_MACFA
g6732	0.317853	0.0409907	NoEnrichment	sp|Q54KA7|SECG_DICDI
g6779	2.04319	-0.0337694	NoEnrichment	NA
g6850	-0.151289	0.0427985	NoEnrichment	sp|G8HTB6|ZPP_ACRMI
g69	0.243909	-0.00416915	NoEnrichment	sp|O57460|TLL1_DANRE
g6940	-0.184058	0.108112	NoEnrichment	sp|A6QPT7|ERAP2_BOVIN
g6980	-0.13322	-0.00259563	NoEnrichment	NA
g7086	0.139023	-0.190361	NoEnrichment	sp|P98198|AT8B2_HUMAN
g710	0.445775	-0.299609	NoEnrichment	sp|Q9NBX4|RTXE_DROME
g7113	0.0314462	0.00430277	NoEnrichment	sp|Q9P267|MBD5_HUMAN
g7119	0.757661	0.251641	NoEnrichment	sp|O60239|3BP5_HUMAN
g712	0.438645	-0.580101	NoEnrichment	NA
g7128	0.47359	0.00618336	NoEnrichment	sp|Q6PF45|VIAAT_XENLA
g7129	-1.28319	0.131527	NoEnrichment	sp|Q6PF45|VIAAT_XENLA
g7149	-0.111133	0.00125305	NoEnrichment	sp|A1DWM3|MFSD6_PIG
g7203	0.586366	0.0729382	NoEnrichment	sp|C5G6D7|CABC2_BACT4
g7255	0.200996	0.0672113	NoEnrichment	sp|Q9W0Y8|SCN60_DROME
g726	0.492809	-0.752349	NoEnrichment	NA
g7262	0.0958699	0.167388	NoEnrichment	sp|P35224|CTNB_URECA
g7264	0.294192	0.0186865	NoEnrichment	sp|Q0VFM6|GMPPA_XENTR
g7319	0.873497	0.0571049	NoEnrichment	sp|P41594|GRM5_HUMAN
g7356	0.16899	0.237102	NoEnrichment	sp|D3ZEN0|MILK2_RAT
g7398	0.0968169	0.106353	NoEnrichment	sp|Q27128|PAPSS_URECA
g7427	-0.334061	-0.000872976	NoEnrichment	NA
g7502	0.397935	0.0689124	NoEnrichment	sp|Q95L74|CY24B_BISBI
g7524	0.052344	0.165766	NoEnrichment	sp|Q6ZMG9|CERS6_HUMAN
g7633	0.302656	-0.039855	NoEnrichment	sp|Q5SX19|PIGL_MOUSE
g7648	0.0272549	0.258491	NoEnrichment	NA
g7652	0.331578	-0.0585668	NoEnrichment	sp|Q52KG5|KI26A_MOUSE
g7675	0.0217289	-0.0499888	NoEnrichment	sp|P42128|FOXK1_MOUSE
g7738	0.330266	-1.11514	NoEnrichment	NA
g7775	0.221956	0.00840394	NoEnrichment	sp|O02703|BAX_BOVIN
g7832	0.115956	0.00948987	NoEnrichment	sp|O95267|GRP1_HUMAN
g7838	0.311838	0.24036	NoEnrichment	NA
g7871	-0.313584	-0.496889	NoEnrichment	NA
g7896	-0.346637	0.0274025	NoEnrichment	NA
g79	0.123101	0.569913	NoEnrichment	sp|Q9C0F3|ZN436_HUMAN
g7964	0.34455	-0.0585115	NoEnrichment	sp|Q03717|KCNB1_MOUSE
g7977	0.329526	0.545326	NoEnrichment	sp|Q9R0S2|MMP24_MOUSE
g7978	0.426265	-0.0126661	NoEnrichment	sp|O77592|S35A3_CANLF
g8004	-0.068022	-0.0417785	NoEnrichment	sp|Q8H0T9|KTNB1_ARATH
g8051	0.968684	0.00346828	NoEnrichment	sp|Q58DD2|S2611_BOVIN
g8165	-0.168802	0.00398207	NoEnrichment	sp|P10079|FBP1_STRPU
g8427	0.358917	-0.0346817	NoEnrichment	sp|Q8JI28|TLL1_XENLA
g8465	-0.114499	0.0028104	NoEnrichment	NA
g8497	-0.185093	0.190944	NoEnrichment	sp|O42350|CO1A2_LITCT
g856	0.269511	0.0599029	NoEnrichment	sp|Q503V9|ENDUB_DANRE
g8591	0.205903	0.0105119	NoEnrichment	sp|Q14AT5|ANO7_MOUSE
g8603	0.453582	-0.0590611	NoEnrichment	sp|Q6ZR37|PKHG7_HUMAN
g8621	-0.117393	0.0215204	NoEnrichment	sp|P0CB38|PAB4L_HUMAN
g8661	0.162585	0.0201254	NoEnrichment	sp|Q9P2J8|ZN624_HUMAN
g8682	-0.318677	-0.00204311	NoEnrichment	NA
g8688	-0.0278636	0.0461456	NoEnrichment	NA
g8690	0.0245753	0.0130136	NoEnrichment	sp|Q7TQK0|CCNT2_MOUSE
g87	-0.193809	0.602216	NoEnrichment	sp|Q4KMC4|GFPT2_RAT
g8735	-0.238302	0.00155735	NoEnrichment	sp|Q7Z442|PK1L2_HUMAN
g8745	-0.905253	-0.0098421	NoEnrichment	NA
g8764	-0.0950992	0.0111965	NoEnrichment	NA
g8768	0.00131755	0.443008	NoEnrichment	sp|Q1KKZ3|HXA9B_TAKRU
g8784	-0.367397	0.147532	NoEnrichment	sp|A1L1W9|MOT10_DANRE
g8798	-0.0344693	-0.00881395	NoEnrichment	sp|Q7Z2Y8|GVIN1_HUMAN
g8864	0.0177224	-0.0474979	NoEnrichment	sp|P31948|STIP1_HUMAN
g8909	-0.667915	-0.0319169	NoEnrichment	NA
g8917	1.73803	-0.0025883	NoEnrichment	sp|P48800|FGF2_CHICK
g8942	0.45641	0.0434374	NoEnrichment	sp|O94844|RHBT1_HUMAN
g8947	0.249639	0.0543159	NoEnrichment	sp|Q5ZKX1|CHM1B_CHICK
g8968	0.179521	-0.125835	NoEnrichment	sp|P55112|NAS4_CAEEL
g8972	-0.0935187	-0.0725571	NoEnrichment	sp|Q99KF1|TMED9_MOUSE
g8976	-0.373713	0.0399342	NoEnrichment	NA
g9001	-0.150277	0.00207997	NoEnrichment	sp|Q9H7F0|AT133_HUMAN
g9063	-0.923526	-0.0811457	NoEnrichment	sp|Q9UPI3|FLVC2_HUMAN
g9117	0.548252	0.252441	NoEnrichment	NA
g9118	-1.1038	-0.192343	NoEnrichment	NA
g9166	-0.0678627	0.108619	NoEnrichment	sp|Q8UWA5|CAH2_TRIHK
g9169	0.864815	0.0178317	NoEnrichment	sp|Q8UWA5|CAH2_TRIHK
g9184	1.11131	-0.0385838	NoEnrichment	sp|P81900|KAPR2_DROME
g9204	0.0746364	-0.00852799	NoEnrichment	sp|B3TP03|CTR2_CHICK
g9227	0.14796	-0.0516087	NoEnrichment	sp|Q6GME2|CK054_XENLA
g9365	0.0301859	0.0490972	NoEnrichment	sp|Q9R0S2|MMP24_MOUSE
g947	0.0934131	-0.00665305	NoEnrichment	sp|P61150|FGF12_RAT
g9527	0.218319	0.113801	NoEnrichment	sp|A6H742|PLSI_BOVIN
g9565	0.443375	-2.17284	NoEnrichment	sp|Q27746|DNMT1_PARLI
g9572	-0.403954	-0.0064649	NoEnrichment	sp|P26436|ASPX_HUMAN
g9693	0.890131	0.198834	NoEnrichment	sp|P18503|CAS4_EPHMU
g9795	-0.0696462	0.0828089	NoEnrichment	NA
g9857	0.402305	-0.0474312	NoEnrichment	sp|P39795|TREC_BACSU
g9994	2.92712	0.517638	Head	sp|Q2W2L2|RS11_MAGSA

## Sheet: Fig. 2B
Peak ID	Gene ID	Regen LogFC	SC LogFC	Structure Enrichment	Swissprot Annotation
10	g5778	-0.13457	0	NoEnrichment	NA
100022	g31460	-0.334033	0.02238	NoEnrichment	sp|Q7Z494|NPHP3_HUMAN
100036	g31462	-0.489285	0.46546	NoEnrichment	sp|P17126|ACT_HYDVU
100155	g27218	0.538612	-0.00196	NoEnrichment	sp|P98154|IDD_MOUSE
100175	g27219	-0.456286	0.24479	NoEnrichment	sp|P53814|SMTN_HUMAN
100176	g27219	-0.516736	0.24479	NoEnrichment	sp|P53814|SMTN_HUMAN
100180	g27219	0.149554	0.24479	NoEnrichment	sp|P53814|SMTN_HUMAN
100184	g27219	0.0295546	0.24479	NoEnrichment	sp|P53814|SMTN_HUMAN
100202	g27221	1.1582	0	NoEnrichment	NA
100203	g27221	1.51209	0	NoEnrichment	NA
100206	g27223	2.18439	0	NoEnrichment	NA
100214	g27225	2.23263	0	NoEnrichment	NA
100216	g27225	0.499162	0	NoEnrichment	NA
100220	g16419	0.402199	0	NoEnrichment	NA
100236	g16499	-0.641891	0	NoEnrichment	NA
100270	g16505	-0.323703	0	NoEnrichment	NA
100319	g16538	-0.272239	0.01546	NoEnrichment	sp|Q28GD9|RNH2B_XENTR
10032	g2839	0.618995	0	NoEnrichment	NA
100369	g16544	0.738833	0.04651	NoEnrichment	sp|A6QQ21|CSN6_BOVIN
100377	g16546	0.531001	0.03231	NoEnrichment	sp|E7F5E1|CE162_DANRE
100412	g16556	-0.357843	0	NoEnrichment	NA
100419	g16557	0.68537	-0.01223	NoEnrichment	sp|Q09604|VAB15_CAEEL
100420	g16557	0.421181	-0.01223	NoEnrichment	sp|Q09604|VAB15_CAEEL
100421	g16557	-0.0659842	-0.01223	NoEnrichment	sp|Q09604|VAB15_CAEEL
100422	g16557	0.735621	-0.01223	NoEnrichment	sp|Q09604|VAB15_CAEEL
100487	g5289	-0.176635	-0.12737	NoEnrichment	sp|Q7ZUW2|HYOU1_DANRE
100500	g20013	-0.548909	0	NoEnrichment	NA
100589	g17139	0.475982	0.03685	NoEnrichment	sp|Q90610|NEO1_CHICK
100610	g17146	0.615377	0	NoEnrichment	sp|Q7JQ07|MOS1T_DROMA
100630	g17150	0.0915207	0	NoEnrichment	sp|Q02006|Y4233_RHOPA
100643	g17151	-0.216919	0	NoEnrichment	NA
100655	g17154	-0.149686	0.16357	NoEnrichment	sp|Q9EPB1|DPP2_RAT
10071	g2855	-0.50825	0	NoEnrichment	NA
10082	g17518	-0.405956	0	NoEnrichment	NA
10083	g17518	-1.34714	0	NoEnrichment	NA
100835	g6538	1.43936	0	NoEnrichment	NA
100836	g6538	1.20841	0	NoEnrichment	NA
100837	g6538	0.507106	0	NoEnrichment	NA
10084	g17518	-0.07335	0	NoEnrichment	NA
100869	g6548	-0.387967	-0.0045	NoEnrichment	sp|Q6ZQ89|MARH6_MOUSE
100889	g6554	-0.713194	0	NoEnrichment	NA
10090	g17518	-0.0042289	0	NoEnrichment	NA
10091	NA	-0.104584	0	NoEnrichment	NA
100995	g1654	-0.0340319	0	NoEnrichment	NA
101008	g1659	0.547141	0	NoEnrichment	NA
101082	g12829	-0.245344	0	NoEnrichment	NA
101086	g12831	-0.185265	0	NoEnrichment	NA
101138	g9138	0.0192559	0.02664	NoEnrichment	sp|Q9QXA6|BAT1_MOUSE
10118	g1089	-0.151122	0.00261	NoEnrichment	sp|Q60547|SYCP3_MESAU
101187	g31949	0.133492	0	NoEnrichment	NA
101189	g31949	-0.880758	0	NoEnrichment	NA
101199	g31950	-0.823151	0	NoEnrichment	NA
101207	g31952	0.411115	0	NoEnrichment	NA
101215	g31953	-0.454921	0	NoEnrichment	NA
101218	g31953	-0.663659	0	NoEnrichment	NA
10124	g1092	-0.931677	0	NoEnrichment	NA
101253	g31959	0.699898	0	NoEnrichment	NA
101300	g9491	0.275307	0	NoEnrichment	NA
101324	g9510	1.30729	0.3152	Head	sp|O88484|PDP2_RAT
101374	g29508	-0.130193	0	NoEnrichment	NA
101386	g29510	-0.321148	-0.00021	NoEnrichment	sp|Q5ZHY5|CHIP_CHICK
101465	g7439	-0.280177	0.04765	NoEnrichment	sp|Q6PC91|BT3L4_DANRE
101498	g33690	1.49016	0	NoEnrichment	sp|P21328|RTJK_DROME
101499	g33690	1.09619	0	NoEnrichment	sp|P21328|RTJK_DROME
101503	g21432	-0.305367	-0.08425	NoEnrichment	sp|O42387|RS24_TAKRU
101578	g13015	0.0520633	0	NoEnrichment	NA
101580	g13016	0.568355	0.047	NoEnrichment	sp|Q5ZKD9|KLH20_CHICK
101625	g13029	0.135645	0	NoEnrichment	NA
101641	g9118	0.203419	0	NoEnrichment	NA
101728	g22611	0.384323	0	NoEnrichment	NA
101738	g22612	0.342217	0.03831	NoEnrichment	sp|Q91827|AR1_XENLA
101741	g22613	-0.231912	0.02252	NoEnrichment	sp|Q0VD42|TM136_BOVIN
101809	g31753	-0.175311	0	NoEnrichment	NA
101829	g31766	0.627816	0	NoEnrichment	NA
101866	g31795	0.260711	0.03701	NoEnrichment	sp|Q8ETH0|HMP_OCEIH
101869	g31795	0.335813	0.03701	NoEnrichment	sp|Q8ETH0|HMP_OCEIH
101875	g31795	0.234434	0.03701	NoEnrichment	sp|Q8ETH0|HMP_OCEIH
101876	g31795	0.104955	0.03701	NoEnrichment	sp|Q8ETH0|HMP_OCEIH
101903	g31804	0.506624	0	NoEnrichment	NA
101905	g31803	0.598277	0	NoEnrichment	NA
101960	g18772	-0.417221	0.00842	NoEnrichment	sp|Q626N3|TM151_CAEBR
101992	g1128	-0.102077	0	NoEnrichment	NA
102043	g1143	0.744374	0	NoEnrichment	sp|Q60997|DMBT1_MOUSE
102083	g1155	-0.579758	0	NoEnrichment	sp|Q86HQ2|ABCG8_DICDI
102153	g1203	-0.0366271	0	NoEnrichment	NA
102156	g1205	0.429381	0	NoEnrichment	NA
102277	g21201	0.0841064	0.12237	NoEnrichment	sp|Q63430|CSDC2_RAT
102337	g21219	-0.710738	-0.88442	NoEnrichment	sp|Q90623|MYPT1_CHICK
102356	g21221	0.280937	0	NoEnrichment	NA
102363	g21222	-0.501351	0	NoEnrichment	sp|Q7LHG5|YI31B_YEAST
102371	g21226	-0.575296	0	NoEnrichment	NA
1024	g13519	-0.527028	0.05064	NoEnrichment	sp|Q7M456|RNOY_CRAGI
102413	g33476	-0.499288	0	NoEnrichment	NA
102438	g33492	1.00523	0	NoEnrichment	NA
102440	g33492	0.802161	0	NoEnrichment	NA
102441	g33492	1.03329	0	NoEnrichment	NA
10245	g29740	0.489684	-0.01543	NoEnrichment	sp|P33610|PRI2_MOUSE
102450	g33493	0.679629	-0.00844	NoEnrichment	sp|B3LYS5|FOXO_DROAN
102451	g33493	1.03905	-0.00844	NoEnrichment	sp|B3LYS5|FOXO_DROAN
102452	g33493	0.456925	-0.00844	NoEnrichment	sp|B3LYS5|FOXO_DROAN
102460	g33494	0.0284717	0	NoEnrichment	NA
102497	g23187	-0.185806	0	NoEnrichment	NA
1025	g13519	-0.132711	0.05064	NoEnrichment	sp|Q7M456|RNOY_CRAGI
102511	g23188	-0.460813	0.19941	NoEnrichment	sp|P31646|S6A13_RAT
102513	g23188	-0.00655498	0.19941	NoEnrichment	sp|P31646|S6A13_RAT
102553	g23196	-0.17954	0	NoEnrichment	NA
102612	g14838	-0.247983	0.0005	NoEnrichment	sp|Q8CBH5|MFSD6_MOUSE
102622	g14839	0.0650349	0.0144	NoEnrichment	sp|B0UYT5|MFD6B_DANRE
102636	g9166	-0.127591	0.10862	NoEnrichment	sp|Q8UWA5|CAH2_TRIHK
102637	g9166	-0.0231206	0.10862	NoEnrichment	sp|Q8UWA5|CAH2_TRIHK
102638	g9166	0.686224	0.10862	NoEnrichment	sp|Q8UWA5|CAH2_TRIHK
102667	g9169	0.5049	0.01783	NoEnrichment	sp|Q8UWA5|CAH2_TRIHK
102675	g9170	-0.234301	-0.00688	NoEnrichment	sp|Q99808|S29A1_HUMAN
10271	g29749	1.10469	0.01527	NoEnrichment	sp|Q24207|BOULE_DROME
10274	g29750	0.834695	1.58866	Head	sp|Q98SN7|WNT2B_CHICK
102781	g9208	1.06672	0	NoEnrichment	NA
102782	g9208	0.640915	0	NoEnrichment	NA
102791	g9209	-1.14776	0.02039	NoEnrichment	sp|P49916|DNLI3_HUMAN
102843	g21939	-0.293016	0	NoEnrichment	NA
103043	g7729	0.307197	0	NoEnrichment	NA
103061	g7731	-0.156294	0	NoEnrichment	NA
1031	g13520	0.535753	0	NoEnrichment	NA
103104	g413	-0.118957	0	NoEnrichment	NA
103128	g421	-0.220846	-0.08176	NoEnrichment	sp|P62083|RS7_RAT
103148	g431	-0.102483	0	NoEnrichment	NA
103217	g445	0.623779	0	NoEnrichment	NA
103224	g447	0.0856547	0	NoEnrichment	sp|Q8IZF6|AGRG4_HUMAN
103229	g447	1.28967	0	NoEnrichment	sp|Q8IZF6|AGRG4_HUMAN
103231	g447	0.878943	0	NoEnrichment	sp|Q8IZF6|AGRG4_HUMAN
103271	g453	1.69967	0.53973	Head	sp|P21213|HUTH_RAT
103291	g15133	0.438878	0.16401	NoEnrichment	sp|Q6MG82|PRRT1_RAT
103321	g15140	-0.240371	0	NoEnrichment	NA
103322	g15141	0.913334	0.00561	NoEnrichment	sp|A4IG66|TM201_DANRE
103323	g15141	0.594564	0.00561	NoEnrichment	sp|A4IG66|TM201_DANRE
103330	g15145	0.234576	0	NoEnrichment	NA
103349	g15148	0.117779	-0.16267	NoEnrichment	sp|Q5R501|OST48_PONAB
103385	g15160	0.804345	0.00177	NoEnrichment	sp|Q6P3X8|PGBD2_HUMAN
103386	g15160	0.371386	0.00177	NoEnrichment	sp|Q6P3X8|PGBD2_HUMAN
103414	g15171	-0.520921	-0.01745	NoEnrichment	sp|P59742|NGB1_ONCMY
103424	g15173	-0.657548	-0.032	NoEnrichment	sp|P86881|NGB_DISMA
103470	g11408	-0.0114798	0.09626	NoEnrichment	sp|Q9Z254|GIPC1_RAT
103501	g10856	0.80787	0	NoEnrichment	NA
103524	g6273	-0.2926	0	NoEnrichment	NA
103532	g9701	-0.703967	0	NoEnrichment	NA
103590	g9721	-0.0314737	0	NoEnrichment	NA
103591	g9721	0.030712	0	NoEnrichment	NA
103592	g9722	1.81853	0	NoEnrichment	NA
10363	g26728	0.496548	0	NoEnrichment	NA
103649	g28899	-0.279959	0.20255	NoEnrichment	sp|Q13057|COASY_HUMAN
103792	g21238	-0.241718	-0.00896	NoEnrichment	sp|Q9P2K1|C2D2A_HUMAN
103892	g28523	-0.59943	0	NoEnrichment	NA
103916	g5911	-0.660517	-0.00537	NoEnrichment	sp|P47810|WEE1_MOUSE
103982	g5926	-0.673132	0.07769	NoEnrichment	sp|P10076|ZFP26_MOUSE
103983	g5926	-0.382959	0.07769	NoEnrichment	sp|P10076|ZFP26_MOUSE
104002	g5933	0.450986	0.1054	NoEnrichment	sp|P17276|PH4H_DROME
104084	g15379	0.461588	0	NoEnrichment	NA
1041	g13528	0.718968	0.00233	NoEnrichment	sp|P41935|HM10_CAEEL
104113	g15387	-0.115396	-0.29635	NoEnrichment	sp|Q566X8|DMX1B_DANRE
104114	g15387	0.141047	-0.29635	NoEnrichment	sp|Q566X8|DMX1B_DANRE
104120	g15388	0.171042	0	NoEnrichment	NA
104126	g15389	-0.0251638	0.00308	NoEnrichment	sp|Q682T9|CALM5_ARATH
104129	g15390	-0.549446	0.24973	NoEnrichment	sp|Q9Y619|ORNT1_HUMAN
104157	g15407	0.251147	0	NoEnrichment	NA
10419	g9848	0.413934	0	NoEnrichment	NA
104207	g29655	0.772663	0	NoEnrichment	NA
104209	g29655	0.740666	0	NoEnrichment	NA
104231	g29661	-0.119766	0.01109	NoEnrichment	sp|Q6P5G6|UBXN7_MOUSE
104239	g29664	-0.240283	0	NoEnrichment	NA
104283	g31576	-0.246819	0	NoEnrichment	NA
104310	g19474	-0.344876	0	NoEnrichment	NA
104324	g19476	-0.292027	0	NoEnrichment	NA
104367	g19497	0.0502443	0	NoEnrichment	NA
104396	g19502	-0.254123	0.1235	NoEnrichment	sp|Q5RID7|SNX17_DANRE
104429	g19513	-0.307978	-0.18853	NoEnrichment	sp|Q8WQI5|RS8_SPOFR
104475	g24010	-0.177941	0	NoEnrichment	sp|Q4KMJ1|CHAC2_DANRE
1045	g13529	0.236291	0	NoEnrichment	NA
10452	g9871	0.380809	-0.0593	NoEnrichment	sp|Q6P2K6|P4R3A_MOUSE
104527	g24023	-0.237603	-0.01237	NoEnrichment	sp|Q566L7|LS14B_XENTR
104549	g24035	0.953651	0	NoEnrichment	NA
104555	g24036	1.57595	0	NoEnrichment	NA
104563	g24037	0.818351	0	NoEnrichment	NA
104565	g24037	0.302703	0	NoEnrichment	NA
104571	g24037	0.245851	0	NoEnrichment	NA
104582	g24040	-0.38431	-0.16695	NoEnrichment	sp|P41105|RL28_MOUSE
104651	g224	0.337745	0	NoEnrichment	NA
104653	g224	-0.240562	0	NoEnrichment	NA
10466	g9879	-0.0525539	-0.09345	NoEnrichment	sp|Q95NT6|MTH2_DROYA
104665	g227	0.848664	0.00349	NoEnrichment	sp|P15388|KCNC1_MOUSE
104718	g24542	-0.248471	-0.5235	NoEnrichment	sp|Q95KH6|RGF1C_MACFA
104770	g9520	0.661819	0.15861	NoEnrichment	sp|P13797|PLST_HUMAN
104773	g9521	0.109191	0.02907	NoEnrichment	sp|Q4V9P6|ADAL_DANRE
104812	g9539	-0.200151	0.08901	NoEnrichment	sp|P21328|RTJK_DROME
104825	g9542	0.160282	-0.00804	NoEnrichment	sp|Q6GL75|DCC1_XENTR
104826	g9542	-0.118238	-0.00804	NoEnrichment	sp|Q6GL75|DCC1_XENTR
104828	g9543	-0.191275	0.08916	NoEnrichment	sp|O55164|MPDZ_RAT
104841	g9550	1.00544	0	NoEnrichment	NA
104843	g9550	0.87646	0	NoEnrichment	NA
104846	g9551	-0.0620987	1.76482	NoEnrichment	sp|P38978|KS1_HYDVU
10488	g9882	0.76252	0	NoEnrichment	NA
104916	g27080	0.443469	-0.10369	NoEnrichment	sp|Q8BGK5|S35F1_MOUSE
104923	g27080	-0.307078	-0.10369	NoEnrichment	sp|Q8BGK5|S35F1_MOUSE
104924	g27080	0.119725	-0.10369	NoEnrichment	sp|Q8BGK5|S35F1_MOUSE
104990	g27095	-0.258964	0	NoEnrichment	NA
105004	g27100	-0.0605258	0.71747	NoEnrichment	sp|Q9JLV1|BAG3_MOUSE
105038	g27119	-0.259238	0	NoEnrichment	NA
105039	g27119	-0.979936	0	NoEnrichment	NA
105056	g32680	0.743741	-0.04799	NoEnrichment	sp|Q5E965|C56D2_BOVIN
105069	g32685	0.0340072	-0.00768	NoEnrichment	sp|Q9BYN7|ZN341_HUMAN
105130	g32707	-0.310155	0.01996	NoEnrichment	sp|Q9NQC3|RTN4_HUMAN
10515	g7468	-0.252462	0	NoEnrichment	NA
105189	g18777	0.617557	0	NoEnrichment	NA
105198	g18779	-0.645993	-0.40912	NoEnrichment	sp|Q61041|NPY4R_MOUSE
105199	g18779	0.18686	-0.40912	NoEnrichment	sp|Q61041|NPY4R_MOUSE
105200	g18779	-0.227651	-0.40912	NoEnrichment	sp|Q61041|NPY4R_MOUSE
105201	g18779	-0.296629	-0.40912	NoEnrichment	sp|Q61041|NPY4R_MOUSE
105290	g11925	0.272183	-0.14046	NoEnrichment	sp|Q9BUZ4|TRAF4_HUMAN
105308	g11929	-0.146329	0.00232	NoEnrichment	sp|Q8WMY2|FPPS_BOVIN
105341	g11950	0.67616	0.0557	NoEnrichment	sp|Q8CFH6|SIK2_MOUSE
105342	g11950	0.0719476	0.0557	NoEnrichment	sp|Q8CFH6|SIK2_MOUSE
105351	g11951	0.617859	0	NoEnrichment	NA
105479	g12000	0.132333	-0.00859	NoEnrichment	sp|Q9CXY1|TM175_MOUSE
105512	g12014	-0.118312	0	NoEnrichment	NA
105577	g23730	-0.27155	-0.20344	NoEnrichment	sp|Q28735|TMEDA_RABIT
105580	g23731	-0.0261145	0	NoEnrichment	NA
105611	g23740	-0.298799	0	NoEnrichment	NA
105627	g23746	-0.316639	0	NoEnrichment	sp|P21328|RTJK_DROME
105665	g23752	0.242012	0	NoEnrichment	NA
10568	g7365	0.562542	0	NoEnrichment	NA
105692	g15311	0.560924	0	NoEnrichment	NA
105749	g28084	-0.348494	-0.00547	NoEnrichment	sp|Q6DN12|MCTP2_HUMAN
105782	g9	-0.0804657	0	NoEnrichment	NA
105786	g10	-0.414146	0	NoEnrichment	NA
10579	g7366	-0.164055	0	NoEnrichment	NA
105855	g23	-0.0401623	0	NoEnrichment	NA
105882	g33	-0.222634	0.03729	NoEnrichment	sp|Q8BPM2|M4K5_MOUSE
105940	g7262	0.501001	0.16739	NoEnrichment	sp|P35224|CTNB_URECA
106046	g21597	0.266085	-0.04608	NoEnrichment	sp|Q92047|PIMT_DANRE
106108	g21613	0.546153	0.12184	NoEnrichment	sp|Q4QQV8|CHMP5_RAT
106109	g21613	0.660092	0.12184	NoEnrichment	sp|Q4QQV8|CHMP5_RAT
106125	g21527	-0.368854	0.00541	NoEnrichment	sp|Q91736|EPB1B_XENLA
106246	g2713	0.233965	0.37195	NoEnrichment	sp|Q91Y77|MOT10_RAT
106275	g2717	1.25681	-0.00345	NoEnrichment	sp|Q05438|BMR1B_CHICK
106282	g2718	-0.276588	0.02734	NoEnrichment	sp|Q9QZ67|PPM1D_MOUSE
10636	g7351	0.275928	0	NoEnrichment	NA
106360	g24065	-0.261269	0	NoEnrichment	NA
106370	g24070	-0.151383	1.51597	NoEnrichment	sp|P70567|TMOD1_RAT
106372	g24070	-0.426889	1.51597	NoEnrichment	sp|P70567|TMOD1_RAT
106377	g24071	-0.156498	-0.00229	NoEnrichment	sp|P32305|5HT7R_RAT
10645	g7354	0.00594283	0	NoEnrichment	NA
106452	g17940	-0.805121	-0.21471	NoEnrichment	sp|Q24799|MYPH_ECHGR
106480	NA	-0.404633	0	NoEnrichment	NA
106539	g13406	0.231137	0.02282	NoEnrichment	sp|Q75N73|S39AE_MOUSE
106543	g13406	0.123546	0.02282	NoEnrichment	sp|Q75N73|S39AE_MOUSE
10716	g9932	0.110261	0	NoEnrichment	NA
10755	g20052	-0.135574	-0.07282	NoEnrichment	sp|Q6PAX2|ATD3B_XENLA
10827	g17392	-0.156522	1.1348	NoEnrichment	sp|Q4R7D3|SAXO1_MACFA
10836	g17395	0.609522	-0.00563	NoEnrichment	sp|Q63060|GLPK_RAT
10839	g17396	-0.734134	0	NoEnrichment	NA
10840	g17396	-1.74394	0	NoEnrichment	NA
10851	NA	-1.10197	0	NoEnrichment	NA
10903	g12323	-0.183602	0	NoEnrichment	NA
10976	g12355	-0.388269	0	NoEnrichment	NA
10977	g12355	0.136852	0	NoEnrichment	NA
11045	g12368	-0.401375	0.01638	NoEnrichment	sp|P16389|KCNA2_HUMAN
1105	g18272	0.114622	0.0016	NoEnrichment	sp|P03934|TC1A_CAEEL
1107	g18272	0.728979	0.0016	NoEnrichment	sp|P03934|TC1A_CAEEL
11099	g6256	0.377441	0	NoEnrichment	NA
11103	g6258	0.382283	0	NoEnrichment	NA
11127	g21476	0.828957	0	NoEnrichment	sp|P25931|NPYR_DROME
11130	g21478	1.14791	0	NoEnrichment	NA
11151	g21479	0.763371	0.04116	NoEnrichment	sp|A1ZAX0|CCH1R_DROME
11154	g21482	-0.120448	0	NoEnrichment	sp|Q7JQ07|MOS1T_DROMA
11175	g21488	0.773999	-0.00937	NoEnrichment	sp|O57422|OPN4B_XENLA
11179	g21488	0.89559	-0.00937	NoEnrichment	sp|O57422|OPN4B_XENLA
11197	g21492	1.05586	0	NoEnrichment	sp|P08116|PVA_PLAFA
11199	g21492	0.589114	0	NoEnrichment	sp|P08116|PVA_PLAFA
11201	g21492	0.808627	0	NoEnrichment	sp|P08116|PVA_PLAFA
11202	g21492	2.24489	0	NoEnrichment	sp|P08116|PVA_PLAFA
11204	g21493	0.449439	0	NoEnrichment	sp|P35072|TCB1_CAEBR
11231	g21508	1.51077	0	NoEnrichment	NA
11241	NA	-0.162186	0	NoEnrichment	NA
11316	g15451	-0.996561	-0.03788	NoEnrichment	sp|P47799|FSHR_HORSE
11340	g15457	0.148121	0.15291	NoEnrichment	sp|O35815|ATX3_RAT
11343	g15457	-0.591669	0.15291	NoEnrichment	sp|O35815|ATX3_RAT
11459	g19999	-0.0756391	0	NoEnrichment	NA
11518	g5851	-0.260608	-0.07805	NoEnrichment	sp|Q8C172|CERS6_MOUSE
11542	g33323	-0.214987	0	NoEnrichment	NA
11563	g23011	0.384631	0.28336	NoEnrichment	sp|Q9NWH7|SPAT6_HUMAN
11616	g23029	0.873973	-0.17439	NoEnrichment	sp|Q5F2F2|ABH15_MOUSE
11620	g23030	1.1121	0	NoEnrichment	sp|P31696|AGRIN_CHICK
11644	g22580	-0.140357	0	NoEnrichment	NA
11656	g22584	0.984871	0.01066	NoEnrichment	sp|Q5ZIM6|AATF_CHICK
11657	g22584	0.35734	0.01066	NoEnrichment	sp|Q5ZIM6|AATF_CHICK
11660	g22585	0.558446	0.21008	NoEnrichment	sp|Q91Z46|DUS7_MOUSE
11690	g29219	0.243203	0.00522	NoEnrichment	sp|P35072|TCB1_CAEBR
11724	g29234	-0.349027	0.1168	NoEnrichment	sp|Q28E95|SH3R1_XENTR
11743	g29242	-0.049834	0	NoEnrichment	NA
11760	g29250	0.598354	-0.07171	NoEnrichment	sp|Q3UTQ8|CDKL5_MOUSE
11767	g29257	0.803969	0.0624	NoEnrichment	sp|Q8SQ72|SGCG_CANLF
11800	g29264	-0.00942044	0.03382	NoEnrichment	sp|Q14185|DOCK1_HUMAN
11805	g29265	-0.0770084	-0.65177	NoEnrichment	sp|Q9DGG6|ADCY9_CHICK
11813	g29266	-0.241184	-0.30454	NoEnrichment	sp|P51830|ADCY9_MOUSE
11815	g29266	-0.535544	-0.30454	NoEnrichment	sp|P51830|ADCY9_MOUSE
11852	g29283	0.798876	0	NoEnrichment	NA
11853	g29284	0.607484	0	NoEnrichment	sp|Q9NBX4|RTXE_DROME
11869	g29288	0.307225	0	NoEnrichment	NA
11906	g29298	-0.100423	0.04587	NoEnrichment	sp|Q9VZW5|FMAR_DROME
11918	g29299	-0.38478	0.07442	NoEnrichment	sp|Q9D0F3|LMAN1_MOUSE
11983	g29317	-0.134494	0.00053	NoEnrichment	sp|Q6DCX5|PCFT_XENLA
12017	g29326	0.632682	0	NoEnrichment	NA
12028	g29330	0.400319	0.0556	NoEnrichment	sp|Q28CQ7|SUV92_XENTR
12041	g29332	1.41351	0.00384	NoEnrichment	sp|O15974|OPSD2_MIZYE
12051	g29334	-0.137181	0	NoEnrichment	sp|H3ZPL1|ARAT1_THELN
12086	g1351	0.548799	0	NoEnrichment	NA
12087	g1351	0.389799	0	NoEnrichment	NA
12089	g1351	0.782257	0	NoEnrichment	NA
12090	g1351	0.89453	0	NoEnrichment	NA
12094	g1352	0.632176	0	NoEnrichment	NA
12098	g1354	-0.373046	0.01706	NoEnrichment	sp|Q8WXI2|CNKR2_HUMAN
12117	g1359	-0.0237646	0	NoEnrichment	NA
12150	g1510	-0.16496	0	NoEnrichment	NA
12162	g1513	-0.252874	-0.11687	NoEnrichment	sp|Q08699|RS14_PODCA
12192	g30700	0.624527	-0.06924	NoEnrichment	sp|Q9BY84|DUS16_HUMAN
12198	g30702	-0.362102	0.10955	NoEnrichment	sp|Q4R3M6|NDUS5_MACFA
12218	g30705	-0.033414	0	NoEnrichment	sp|Q3ZCU0|YK006_HUMAN
12248	g30709	1.86689	0.89948	Head	sp|A6QPN6|GILT_BOVIN
12287	g30724	-0.504945	0	NoEnrichment	NA
12293	g30727	0.118034	0.15948	NoEnrichment	sp|Q9NBX4|RTXE_DROME
12294	g30728	0.564954	0	NoEnrichment	NA
12295	g30728	1.16602	0	NoEnrichment	NA
12387	g13309	0.280441	-0.05611	NoEnrichment	sp|P41252|SYIC_HUMAN
12394	g4995	-0.0995449	0.15164	NoEnrichment	sp|P63079|GBRB3_RAT
12544	g32930	-0.0389206	0.07897	NoEnrichment	sp|Q2U7A3|ACT_ASPOR
12548	g32930	0.38307	0.07897	NoEnrichment	sp|Q2U7A3|ACT_ASPOR
12769	g9285	-0.157022	0	NoEnrichment	sp|O75132|ZBED4_HUMAN
1277	g23834	-0.19799	0.01566	NoEnrichment	sp|Q640L2|SPX3_XENLA
12811	g6414	0.0266315	0.01041	NoEnrichment	sp|A6NHR9|SMHD1_HUMAN
12812	g6415	1.47576	0.00391	NoEnrichment	sp|Q11075|YWV1_CAEEL
12820	g6417	-1.169	0.0277	NoEnrichment	sp|Q9CZR2|NALD2_MOUSE
12821	g6417	0.320292	0.0277	NoEnrichment	sp|Q9CZR2|NALD2_MOUSE
12895	g9809	0.647617	0.06173	NoEnrichment	sp|Q53FV1|ORML2_HUMAN
12925	g9814	0.373534	0	NoEnrichment	NA
12938	g9815	-0.0407482	-0.2953	NoEnrichment	sp|P0C1Q2|PDE11_MOUSE
12967	g9820	0.938925	0	NoEnrichment	NA
12968	g9820	0.285188	0	NoEnrichment	NA
13019	g9830	-0.632449	0	NoEnrichment	NA
13020	g9830	-0.173756	0	NoEnrichment	NA
13044	g9835	-0.33536	0.14871	NoEnrichment	sp|Q9I8S4|AZIN2_XENLA
13045	g9835	0.459837	0.14871	NoEnrichment	sp|Q9I8S4|AZIN2_XENLA
13061	g29097	0.195127	0	NoEnrichment	NA
13082	g29099	0.7762	0.22531	Head	sp|B8VIW9|FP_ACRMI
13131	g19215	-0.897414	0	NoEnrichment	NA
13157	g19218	-0.166486	0	NoEnrichment	NA
13169	g19220	-0.29343	0	NoEnrichment	NA
13170	g19220	-0.402431	0	NoEnrichment	NA
13177	g19221	-0.613884	0	NoEnrichment	NA
13179	g19221	-0.133295	0	NoEnrichment	NA
13193	g19222	1.43065	0	NoEnrichment	NA
13200	g19223	0.156003	0	NoEnrichment	NA
13210	g19229	-0.225187	0	NoEnrichment	NA
13237	g19232	0.228844	0	NoEnrichment	NA
1327	g11049	0.5338	0	NoEnrichment	sp|P35072|TCB1_CAEBR
1328	g11049	2.20267	0	NoEnrichment	sp|P35072|TCB1_CAEBR
13283	g19240	1.90709	0	NoEnrichment	NA
13312	g9691	0.708291	0.04047	NoEnrichment	sp|Q9VHR6|ATG13_DROME
13317	g9693	1.14413	0.19883	NoEnrichment	sp|P18503|CAS4_EPHMU
13322	g9693	0.934593	0.19883	Head	sp|P18503|CAS4_EPHMU
13337	g9694	0.43289	0.68307	NoEnrichment	sp|Q6I6M7|FGF1_CYNPY
13338	g9694	0.584236	0.68307	NoEnrichment	sp|Q6I6M7|FGF1_CYNPY
13444	g19984	0.626219	0.00171	NoEnrichment	sp|Q02225|SKI_XENLA
13445	g19984	1.31694	0.00171	NoEnrichment	sp|Q02225|SKI_XENLA
13447	g19984	1.33082	0.00171	NoEnrichment	sp|Q02225|SKI_XENLA
13448	g19984	-0.0488587	0.00171	NoEnrichment	sp|Q02225|SKI_XENLA
13449	g19984	0.788183	0.00171	NoEnrichment	sp|Q02225|SKI_XENLA
1345	g11056	-0.496181	0	NoEnrichment	NA
13450	g19984	0.242117	0.00171	NoEnrichment	sp|Q02225|SKI_XENLA
1347	g11056	-0.597201	0	NoEnrichment	NA
13534	g22631	0.941536	0.00484	NoEnrichment	sp|Q58A42|DD3_DICDI
13535	g22633	1.68916	0.01654	NoEnrichment	sp|P34275|IVD_CAEEL
13552	g22637	0.412794	0	NoEnrichment	NA
13556	g22638	-0.42055	0	NoEnrichment	NA
13586	g22646	1.41959	-0.01822	NoEnrichment	sp|P0CH95|PHF8_DANRE
1359	g11058	0.0907541	-0.11082	NoEnrichment	sp|C4R7Z3|C9MT_KOMPG
13590	g22646	-0.391651	-0.01822	NoEnrichment	sp|P0CH95|PHF8_DANRE
13592	g22646	-0.224375	-0.01822	NoEnrichment	sp|P0CH95|PHF8_DANRE
13600	g22647	0.690438	0	NoEnrichment	NA
13601	g22647	1.97139	0	NoEnrichment	NA
13623	g22652	0.950416	0	NoEnrichment	NA
13636	g22656	0.187874	0.00196	NoEnrichment	sp|Q59WG5|Y2336_CANAL
13641	g22657	0.260051	0	NoEnrichment	sp|Q3ZCU0|YK006_HUMAN
13642	g22657	-0.56369	0	NoEnrichment	sp|Q3ZCU0|YK006_HUMAN
1365	g11059	-0.78945	0.02177	NoEnrichment	sp|Q9BQI7|PSD2_HUMAN
13669	g22663	0.639366	0	NoEnrichment	NA
13671	g22664	0.547305	0	NoEnrichment	NA
13695	g22671	-0.0846917	0.04207	NoEnrichment	sp|Q12792|TWF1_HUMAN
13710	g22674	0.0385948	0	NoEnrichment	NA
13713	g22675	0.256697	0	NoEnrichment	NA
13728	g22677	-0.145459	0.1838	NoEnrichment	sp|Q8IWV2|CNTN4_HUMAN
13789	g22695	0.305475	0	NoEnrichment	NA
13864	g234	0.492499	1.44694	NoEnrichment	sp|P05933|CALM_SCHPO
13873	g236	0.408667	-0.06478	NoEnrichment	sp|Q02104|LIP1_PSYIM
13886	g240	0.365347	0.0866	NoEnrichment	sp|P25325|THTM_HUMAN
13906	g245	0.691391	0.24151	NoEnrichment	sp|A7MB28|NDRG3_BOVIN
13917	g247	-0.13127	-0.01279	NoEnrichment	sp|O15160|RPAC1_HUMAN
13948	g268	0.0881637	-0.03389	NoEnrichment	sp|Q5REW1|IYD1_PONAB
13950	g269	0.254913	0.04643	NoEnrichment	sp|Q9BGT1|TTC9C_MACFA
13969	g278	0.467875	0	NoEnrichment	sp|Q4R3D6|ZMYM5_MACFA
13994	g14067	-0.112147	0.00792	NoEnrichment	sp|Q3UYK3|TBCD9_MOUSE
14054	g14090	-0.408474	0	NoEnrichment	NA
14057	g14092	0.104841	0	NoEnrichment	sp|P86854|PLCL_MYTGA
14111	g18232	-0.561665	0	NoEnrichment	sp|Q9Y2U5|M3K2_HUMAN
14197	g31198	1.45889	0.23269	Head	sp|Q8R4T9|UT2_MOUSE
14200	g31198	1.16033	0.23269	NoEnrichment	sp|Q8R4T9|UT2_MOUSE
1423	g6615	0.401797	0	NoEnrichment	NA
14231	g20059	0.478084	0	NoEnrichment	NA
14248	g20062	0.00969472	0.00688	NoEnrichment	sp|P18761|CAH6_MOUSE
14282	g20074	-0.296751	0.16423	NoEnrichment	sp|Q6DDT1|INO1B_XENLA
14300	g20080	0.325556	-0.02178	NoEnrichment	sp|P00491|PNPH_HUMAN
14315	g20083	1.33163	-0.04002	NoEnrichment	sp|O57525|CP17A_RANDY
14390	g20102	-0.413449	0	NoEnrichment	NA
14469	g20118	0.513536	0	NoEnrichment	NA
14470	g20118	0.510792	0	NoEnrichment	NA
14500	g20127	-0.0429899	-0.00294	NoEnrichment	sp|Q64514|TPP2_MOUSE
14565	g21749	-0.253991	0	NoEnrichment	sp|P21328|RTJK_DROME
14632	g21761	0.759348	0.00202	NoEnrichment	sp|Q9Y5R5|DMRT2_HUMAN
14634	g21761	1.19739	0.00202	NoEnrichment	sp|Q9Y5R5|DMRT2_HUMAN
14635	g21761	1.38126	0.00202	NoEnrichment	sp|Q9Y5R5|DMRT2_HUMAN
14636	g21761	-0.132897	0.00202	NoEnrichment	sp|Q9Y5R5|DMRT2_HUMAN
14729	g21792	-0.134265	0	NoEnrichment	NA
14733	g21793	0.400483	0	NoEnrichment	NA
14770	g21807	0.475645	0	NoEnrichment	sp|Q6AXJ9|CDKL1_DANRE
14802	g21818	-0.16655	0	NoEnrichment	NA
14841	g22270	-0.128616	-0.11753	NoEnrichment	sp|Q9JIX8|ACINU_MOUSE
14852	g22276	-0.303034	-0.02656	NoEnrichment	sp|P30664|MCM4B_XENLA
14881	g24469	0.00474165	0	NoEnrichment	NA
14883	g24469	-0.531146	0	NoEnrichment	NA
14894	g24469	-0.640131	0	NoEnrichment	NA
14938	g3220	0.50825	0.0347	NoEnrichment	sp|Q9TWL9|COMA_CONMA
14944	g3221	-0.372028	0.98055	NoEnrichment	sp|Q7T2H2|FGRL1_CHICK
14971	g3229	0.563692	0	NoEnrichment	NA
15007	g12118	-0.500289	0	NoEnrichment	NA
15038	g9381	-0.171505	0	NoEnrichment	NA
1506	g6635	0.643396	0.08155	NoEnrichment	sp|Q7Z7L7|ZER1_HUMAN
1507	g6635	0.311182	0.08155	NoEnrichment	sp|Q7Z7L7|ZER1_HUMAN
15175	g13666	0.310586	0	NoEnrichment	NA
15179	g13667	-0.374523	-0.03018	NoEnrichment	sp|Q587J7|TDR12_HUMAN
15232	NA	0.320674	0	NoEnrichment	NA
15288	g27925	0.310301	0.03758	NoEnrichment	sp|D2IYS2|TORSO_BOMMO
15351	g27960	-0.415733	0	NoEnrichment	NA
15352	g27960	-1.72448	0	NoEnrichment	NA
15367	g9102	-0.383695	0.01742	NoEnrichment	sp|Q00534|CDK6_HUMAN
15380	g9106	0.257187	0	NoEnrichment	NA
15400	g9114	-0.149653	0	NoEnrichment	NA
15409	g32575	-0.0399792	0	NoEnrichment	NA
15410	g32575	0.173066	0	NoEnrichment	NA
1544	g6648	-0.256465	0.00673	NoEnrichment	sp|Q9C0J1|B3GN4_HUMAN
15475	g13927	0.862988	0	NoEnrichment	NA
15538	g13937	-0.0859198	0	NoEnrichment	NA
15548	g13940	-0.338337	0	NoEnrichment	NA
15566	g13950	-0.427383	0	NoEnrichment	NA
15638	g8428	0.338351	0	NoEnrichment	NA
15691	g32915	-0.183704	-0.05326	NoEnrichment	sp|Q28C98|MESH1_XENTR
15705	g32919	0.0133526	0	NoEnrichment	NA
15716	g32919	-0.462283	0	NoEnrichment	NA
15717	g32919	-0.606256	0	NoEnrichment	NA
15718	g32919	-0.344365	0	NoEnrichment	NA
15784	g7459	-0.634651	0.00056	NoEnrichment	sp|P78325|ADAM8_HUMAN
15786	g7459	1.0343	0.00056	NoEnrichment	sp|P78325|ADAM8_HUMAN
15799	g153	0.626615	0	NoEnrichment	NA
15824	g160	1.3764	0	NoEnrichment	NA
15836	g167	-0.459044	0	NoEnrichment	NA
15893	g187	-0.152487	-0.08322	NoEnrichment	sp|Q96ES7|SGF29_HUMAN
15915	g196	-0.227542	-0.11158	NoEnrichment	sp|Q9PV90|RLA0_DANRE
15961	g213	0.491708	0	NoEnrichment	NA
15987	g4665	0.954988	0.01657	NoEnrichment	sp|Q2HJ23|MLP3A_BOVIN
16006	g4670	-0.508007	0	NoEnrichment	NA
16008	g4670	-0.991199	0	NoEnrichment	NA
16023	g4672	1.10123	0.00226	NoEnrichment	sp|P08016|EGGS_SCHMA
16048	g4679	0.35848	0.15935	NoEnrichment	sp|Q7U6F4|RIMK_SYNPX
16061	g14003	0.140881	-0.03831	NoEnrichment	sp|O35607|BMPR2_MOUSE
16064	g14003	-0.246933	-0.03831	NoEnrichment	sp|O35607|BMPR2_MOUSE
16096	g1738	-1.56826	0	NoEnrichment	NA
1610	g3605	1.30874	0	NoEnrichment	NA
16107	g1742	0.4898	-0.09677	NoEnrichment	sp|Q5XXP2|OPN4_PHOSU
16108	g1742	1.08224	-0.09677	NoEnrichment	sp|Q5XXP2|OPN4_PHOSU
16111	g1743	-0.0844146	0.10028	NoEnrichment	sp|Q16363|LAMA4_HUMAN
1617	g3604	0.0208711	-0.03597	NoEnrichment	sp|Q01063|PDE4D_MOUSE
16172	g1757	0.414494	0	NoEnrichment	NA
16186	g1760	-0.488693	0.0015	NoEnrichment	sp|P61294|RAB6B_MOUSE
1619	g3607	-0.169082	0	NoEnrichment	sp|Q9H5L6|THAP9_HUMAN
16196	g1764	-0.315671	0	NoEnrichment	NA
16197	g1765	-0.0283518	0.05558	NoEnrichment	sp|Q9Y376|CAB39_HUMAN
16198	g1765	-0.424068	0.05558	NoEnrichment	sp|Q9Y376|CAB39_HUMAN
16209	g1768	0.895607	0.06777	NoEnrichment	sp|Q6GP53|NAA50_XENLA
16289	g1803	-0.601167	0	NoEnrichment	NA
1633	g3617	-0.166998	0	NoEnrichment	NA
16348	g1836	0.198701	0.0165	NoEnrichment	sp|Q8AWH3|SX17A_XENTR
16395	g1849	1.71647	0	NoEnrichment	NA
16413	g1856	0.40372	0	NoEnrichment	NA
16428	g1858	0.74255	0.00031	NoEnrichment	sp|Q2Z1R2|SOX1B_DANRE
16429	g1858	0.580047	0.00031	NoEnrichment	sp|Q2Z1R2|SOX1B_DANRE
16448	g1868	0.33173	0	NoEnrichment	sp|Q02391|GSLG1_CHICK
16449	g1868	0.291981	0	NoEnrichment	sp|Q02391|GSLG1_CHICK
16495	g1874	0.320968	-0.08005	NoEnrichment	sp|P56945|BCAR1_HUMAN
16512	g1877	1.22906	0.02888	NoEnrichment	sp|Q6TMK4|POXA_DICDI
16535	g1881	-0.781541	-0.00383	NoEnrichment	sp|O43402|EMC8_HUMAN
16567	g30932	-0.062269	0.02653	NoEnrichment	sp|O43824|GTPB6_HUMAN
16598	g6659	1.1164	0.00355	NoEnrichment	sp|Q8HXX6|SAP3_MACFA
16622	g6671	-0.346541	0	NoEnrichment	NA
16644	g13898	-0.464851	0.05533	NoEnrichment	sp|Q7PHR1|KIF1A_ANOGA
16647	g13899	-0.264456	0	NoEnrichment	sp|C6KSQ6|RAD50_PLAF7
16681	g13907	0.242328	-0.36014	NoEnrichment	sp|O88866|HUNK_MOUSE
16686	g13907	0.281312	-0.36014	NoEnrichment	sp|O88866|HUNK_MOUSE
16688	g13907	0.455395	-0.36014	NoEnrichment	sp|O88866|HUNK_MOUSE
16703	g13917	0.635784	0	NoEnrichment	NA
16704	g13917	0.121987	0	NoEnrichment	NA
16836	g33238	-0.406667	0	NoEnrichment	NA
16862	g33243	0.053991	0	NoEnrichment	sp|P21328|RTJK_DROME
16880	g33253	0.968768	0.07554	NoEnrichment	sp|Q9Z1P7|KANK3_MOUSE
16881	g33253	0.499469	0.07554	NoEnrichment	sp|Q9Z1P7|KANK3_MOUSE
17052	g11736	0.265443	0.09494	NoEnrichment	sp|Q91770|NOT2_XENLA
17072	g11745	1.18305	0.37063	Head	sp|Q90623|MYPT1_CHICK
17075	g11745	0.468527	0.37063	NoEnrichment	sp|Q90623|MYPT1_CHICK
17077	g11745	0.464271	0.37063	NoEnrichment	sp|Q90623|MYPT1_CHICK
17082	g11746	-0.298191	0	NoEnrichment	NA
17140	g11761	-0.235178	0.0288	NoEnrichment	sp|Q9JHX4|CASP8_RAT
17153	g1680	-0.342127	0.18755	NoEnrichment	sp|Q06646|AT5G2_RAT
17194	g1705	1.30594	-0.03326	NoEnrichment	sp|Q8N8A2|ANR44_HUMAN
17196	g1705	0.953852	-0.03326	NoEnrichment	sp|Q8N8A2|ANR44_HUMAN
17256	g33731	-0.170804	-0.23849	NoEnrichment	sp|P70566|TMOD2_RAT
17257	g33731	0.535502	-0.23849	NoEnrichment	sp|P70566|TMOD2_RAT
17259	g33731	-0.382701	-0.23849	NoEnrichment	sp|P70566|TMOD2_RAT
17261	g33731	-0.0129588	-0.23849	NoEnrichment	sp|P70566|TMOD2_RAT
17318	g33744	-0.429758	0	NoEnrichment	NA
17321	g33744	-0.720504	0	NoEnrichment	NA
17323	g33744	-0.667137	0	NoEnrichment	NA
17486	g14267	-0.310654	0.20143	NoEnrichment	sp|Q921D9|GRHL1_MOUSE
17512	g14274	-0.765888	0	NoEnrichment	NA
17566	g9901	0.192222	0	NoEnrichment	sp|Q95SX7|RTBS_DROME
17752	g12039	-0.0335821	0.00595	NoEnrichment	sp|Q505D9|TRI67_MOUSE
17760	g12041	0.984037	0	NoEnrichment	NA
17764	g12042	0.976072	0	NoEnrichment	NA
17785	g12048	-0.232776	-0.07196	NoEnrichment	sp|P62282|RS11_RAT
17796	g12055	0.723467	0	NoEnrichment	NA
17797	g12055	0.200104	0	NoEnrichment	NA
17801	g12056	0.127619	0	NoEnrichment	NA
17829	g12059	-0.246637	-0.15804	NoEnrichment	sp|Q8X034|RL15_NEUCR
17876	g9565	1.86406	-2.17284	NoEnrichment	sp|Q27746|DNMT1_PARLI
17877	g9565	0.759389	-2.17284	NoEnrichment	sp|Q27746|DNMT1_PARLI
1788	g28531	0.421275	0	NoEnrichment	NA
1793	NA	0.170482	0	NoEnrichment	NA
17967	g8541	-0.659572	0.10804	NoEnrichment	sp|Q9QZD5|RAE2_MOUSE
17975	g8550	0.214129	-0.15571	NoEnrichment	sp|Q9UHC3|ASIC3_HUMAN
18015	g8566	0.559305	0.04412	NoEnrichment	sp|E9Q414|APOB_MOUSE
18039	g8573	0.567364	0	NoEnrichment	NA
18044	g8574	-0.195751	0	NoEnrichment	NA
18048	g8574	-0.111948	0	NoEnrichment	NA
18049	g8574	0.00717738	0	NoEnrichment	NA
18079	g8589	-0.193851	0.03601	NoEnrichment	sp|Q5ZKP7|S2536_CHICK
18111	g8603	-0.328132	-0.05906	NoEnrichment	sp|Q6ZR37|PKHG7_HUMAN
18113	g8603	-0.695261	-0.05906	NoEnrichment	sp|Q6ZR37|PKHG7_HUMAN
18136	g8604	-0.0348064	-0.06302	NoEnrichment	sp|Q58D06|WDR74_BOVIN
18167	g8608	0.341449	0	NoEnrichment	NA
1817	g7341	-0.240878	0	NoEnrichment	NA
18220	g32577	0.60372	0.04685	NoEnrichment	sp|P54289|CA2D1_HUMAN
18239	g32582	-0.658802	-0.28645	NoEnrichment	sp|Q1W617|SHRM4_MOUSE
18241	g32582	-0.381366	-0.28645	NoEnrichment	sp|Q1W617|SHRM4_MOUSE
18287	NA	-0.078917	0	NoEnrichment	NA
18296	g15773	0.438218	0	NoEnrichment	NA
18307	g15774	0.550584	-0.0327	NoEnrichment	sp|P51577|P2RX4_RAT
18380	g26099	-0.390506	0	NoEnrichment	NA
18414	g26107	-0.180242	-0.07187	NoEnrichment	sp|Q9BQS2|SYT15_HUMAN
1844	g10564	0.152627	0	NoEnrichment	sp|O00370|LORF2_HUMAN
18501	g2865	-0.0852468	0	NoEnrichment	NA
18517	g2871	-0.478174	0	NoEnrichment	NA
18531	NA	-0.178017	0	NoEnrichment	NA
18539	g17412	-0.0569014	0	NoEnrichment	sp|Q3V5L5|MGT5B_HUMAN
18556	g1007	-0.469844	0	NoEnrichment	sp|Q09328|MGT5A_HUMAN
18579	g18032	0.211962	0	NoEnrichment	NA
18693	g5384	0.560536	0	NoEnrichment	NA
18719	g5391	-0.769098	0.04463	NoEnrichment	sp|Q8IY22|CMIP_HUMAN
18721	g5391	-0.57498	0.04463	NoEnrichment	sp|Q8IY22|CMIP_HUMAN
18723	g5391	-0.513907	0.04463	NoEnrichment	sp|Q8IY22|CMIP_HUMAN
18725	g5391	-0.61737	0.04463	NoEnrichment	sp|Q8IY22|CMIP_HUMAN
18726	g5391	-0.657026	0.04463	NoEnrichment	sp|Q8IY22|CMIP_HUMAN
18728	g5392	0.232581	0	NoEnrichment	NA
18742	g5395	1.60175	-0.00697	NoEnrichment	sp|P52164|MAX_RAT
18756	g5398	-0.45414	0	NoEnrichment	NA
1877	g16741	-0.170064	0	NoEnrichment	NA
18789	g65	0.462123	0	NoEnrichment	NA
18792	g65	0.341543	0	NoEnrichment	NA
18814	g69	0.246495	-0.00417	NoEnrichment	sp|O57460|TLL1_DANRE
18829	g70	0.518695	0	NoEnrichment	NA
18862	g11083	-0.307453	0	NoEnrichment	NA
189	g18917	0.0719914	0.05095	NoEnrichment	sp|Q16827|PTPRO_HUMAN
1890	g16742	-0.0599817	0	NoEnrichment	NA
18948	g25443	-0.28419	0	NoEnrichment	NA
19062	g25501	-0.738614	0	NoEnrichment	NA
19172	g2514	-0.0554484	0	NoEnrichment	sp|D3ZEH5|SIDT2_RAT
19186	g6782	-0.145456	0	NoEnrichment	NA
19266	g13566	0.0981619	0	NoEnrichment	NA
19321	g16876	0.212163	-0.00278	NoEnrichment	sp|A7RU46|NAPA_NEMVE
19413	g16907	-0.103756	-0.00774	NoEnrichment	sp|B3EWZ6|MLRP2_ACRMI
19504	g21991	-0.0902174	0.03099	NoEnrichment	sp|Q3T075|STX8_BOVIN
19508	g21993	1.30179	1.3833	NoEnrichment	sp|P24733|MYS_ARGIR
19516	g21993	-0.922108	1.3833	NoEnrichment	sp|P24733|MYS_ARGIR
19543	g15763	-0.643723	0	NoEnrichment	NA
19544	g15763	-0.230174	0	NoEnrichment	NA
19601	g13799	0.53503	0	NoEnrichment	NA
19602	g13799	0.616005	0	NoEnrichment	NA
19603	g13799	0.738744	0	NoEnrichment	NA
19605	g13799	-0.0567508	0	NoEnrichment	NA
19630	g13803	1.03127	-0.00713	NoEnrichment	sp|Q6ING7|FLAD1_XENLA
19675	g13814	0.290657	-0.28593	NoEnrichment	sp|Q63406|MCF2L_RAT
19685	g13823	-0.246541	0	NoEnrichment	NA
19711	g4076	0.148935	0.00041	NoEnrichment	sp|B0BNR5|IF2_ACTPJ
19734	g4084	-0.308431	-0.02885	NoEnrichment	sp|Q9QZC7|PKHB2_MOUSE
19749	g4091	0.0488327	-0.00039	NoEnrichment	sp|Q8NB59|SYT14_HUMAN
1975	g30824	-0.320449	0	NoEnrichment	sp|Q08DK7|MCATL_BOVIN
19819	g23620	0.43373	-0.27922	NoEnrichment	sp|P61315|G3ST3_MOUSE
19823	g23620	0.434077	-0.27922	NoEnrichment	sp|P61315|G3ST3_MOUSE
19899	NA	-0.109624	0	NoEnrichment	NA
19946	g14016	0.22749	0	NoEnrichment	NA
19949	g14016	-0.416665	0	NoEnrichment	NA
19957	g14018	1.03321	-0.05786	NoEnrichment	sp|Q15063|POSTN_HUMAN
19959	g14018	-0.495493	-0.05786	NoEnrichment	sp|Q15063|POSTN_HUMAN
19960	g14018	0.168723	-0.05786	NoEnrichment	sp|Q15063|POSTN_HUMAN
19962	g14019	-0.412031	-0.00393	NoEnrichment	sp|A0JP70|WDR90_XENTR
19970	g14025	-0.131799	-0.01379	NoEnrichment	sp|P60670|NPL4_MOUSE
19986	g14034	0.371685	0	NoEnrichment	NA
20106	g7740	0.124	0	NoEnrichment	sp|Q1ZZH1|GRM3_MACFA
20139	g10585	0.925795	0	NoEnrichment	sp|Q8IZJ1|UNC5B_HUMAN
20152	g10588	0.562197	-0.01869	NoEnrichment	sp|Q9V785|3BP5H_DROME
20153	g10588	-0.285375	-0.01869	NoEnrichment	sp|Q9V785|3BP5H_DROME
20156	g10588	-0.319775	-0.01869	NoEnrichment	sp|Q9V785|3BP5H_DROME
20187	g10594	-0.21876	0.10339	NoEnrichment	sp|O35426|XBP1_MOUSE
20204	g10596	0.080063	0	NoEnrichment	NA
20216	g10600	-0.356855	0	NoEnrichment	NA
20219	g10604	-0.114038	0.53556	NoEnrichment	sp|P49715|CEBPA_HUMAN
20220	g10604	0.226892	0.53556	NoEnrichment	sp|P49715|CEBPA_HUMAN
20282	NA	0.377328	0	NoEnrichment	NA
203	g18921	1.28115	7.75e-05	NoEnrichment	sp|Q9YGW7|DAZL_DANRE
20302	g7859	0.525678	-0.00753	NoEnrichment	sp|P32674|PFLD_ECOLI
20316	g7862	0.396852	0	NoEnrichment	NA
20321	g7863	0.1219	0.27663	NoEnrichment	sp|Q66HA4|TAXB1_RAT
20346	g7872	-0.254804	-0.02213	NoEnrichment	sp|Q8R4V5|OIT3_MOUSE
20366	g9459	0.36148	0	NoEnrichment	sp|Q7Z3K3|POGZ_HUMAN
20397	g1266	0.486925	-0.01622	NoEnrichment	sp|O16025|AOSL_PLEHO
20486	g8471	0.449005	0	NoEnrichment	NA
20509	g8475	0.200957	0.02327	NoEnrichment	sp|Q5F485|DDX42_CHICK
20543	g8486	-0.379522	0.06682	NoEnrichment	sp|F1LMZ8|PSD11_RAT
20563	g8497	-0.778213	0.19094	NoEnrichment	sp|O42350|CO1A2_LITCT
20564	g8497	-0.890476	0.19094	NoEnrichment	sp|O42350|CO1A2_LITCT
20565	g8497	-0.949636	0.19094	NoEnrichment	sp|O42350|CO1A2_LITCT
20566	g8497	-0.0367841	0.19094	NoEnrichment	sp|O42350|CO1A2_LITCT
20579	g8503	0.0342207	0	NoEnrichment	NA
20582	g8504	-0.280587	0	NoEnrichment	NA
2060	g308	0.0888231	0.00348	NoEnrichment	sp|O00222|GRM8_HUMAN
20663	g2057	0.201664	0	NoEnrichment	NA
20705	g25546	-0.0607357	0	NoEnrichment	NA
20708	g25548	-0.12561	0	NoEnrichment	NA
20727	g25556	-0.179857	0.16256	NoEnrichment	sp|A7E2S9|A30BL_HUMAN
20730	g25556	0.55967	0.16256	NoEnrichment	sp|A7E2S9|A30BL_HUMAN
20736	g25557	-0.440295	-0.00727	NoEnrichment	sp|Q9H1Y3|OPN3_HUMAN
20756	g25565	-0.306711	0.01127	NoEnrichment	sp|Q8AVY1|ODF3A_XENLA
20789	g25574	0.520306	0	NoEnrichment	NA
20819	g25579	1.14743	0	NoEnrichment	NA
20884	g12906	-0.413024	-0.01635	NoEnrichment	sp|Q02556|IRF8_HUMAN
20911	g12918	0.402511	0	NoEnrichment	NA
20919	g12926	-0.223249	0	NoEnrichment	NA
21000	g12945	0.244531	0	NoEnrichment	NA
21031	g12951	-0.205781	0	NoEnrichment	NA
21048	g12966	0.522842	0	NoEnrichment	NA
21084	g5147	0.931731	0	NoEnrichment	NA
21086	g5147	1.81438	0	NoEnrichment	NA
21087	g5148	0.959384	0	NoEnrichment	NA
21100	g5150	0.946001	0.04923	NoEnrichment	sp|Q12802|AKP13_HUMAN
21160	g21719	0.245277	0	NoEnrichment	NA
2119	g321	0.148382	0	NoEnrichment	NA
21228	g23844	-1.11101	0	NoEnrichment	NA
21246	g23847	0.393267	0.14422	NoEnrichment	sp|Q2KN96|CYTSA_XENTR
21315	g23869	0.425741	0	NoEnrichment	NA
21316	g23869	0.0971992	0	NoEnrichment	NA
21358	g17928	1.25128	0	NoEnrichment	NA
21413	g30660	-0.435099	-0.00375	NoEnrichment	sp|Q91WL6|SNX11_MOUSE
2142	g324	-0.55629	0	NoEnrichment	NA
21439	g30671	-0.351337	-0.0024	NoEnrichment	sp|J3S6Y1|TSEAR_MOUSE
21444	g30671	-0.0480218	-0.0024	NoEnrichment	sp|J3S6Y1|TSEAR_MOUSE
21470	g17459	0.367688	0.03574	NoEnrichment	sp|O60308|CE104_HUMAN
21510	g17465	-0.454706	-0.10133	NoEnrichment	sp|Q9H8Y8|GORS2_HUMAN
21544	g30616	0.218098	1.07984	NoEnrichment	sp|P16562|CRIS2_HUMAN
21572	g20713	-0.398351	0.01664	NoEnrichment	sp|Q3A258|RIMK_PELCD
21628	g20728	-0.0213226	0	NoEnrichment	sp|P22897|MRC1_HUMAN
21630	g20728	0.136695	0	NoEnrichment	sp|P22897|MRC1_HUMAN
21677	g13741	-0.397948	0.00178	NoEnrichment	sp|Q27433|MEC2_CAEEL
21694	g28429	1.09103	0	NoEnrichment	NA
217	g18923	-0.809303	0	NoEnrichment	NA
21701	g28430	0.611749	0	NoEnrichment	NA
21710	g28434	0.815603	0	NoEnrichment	sp|P35072|TCB1_CAEBR
21735	NA	-0.296261	0	NoEnrichment	NA
218	g18923	-0.307008	0	NoEnrichment	NA
2183	g334	0.160539	-0.0064	NoEnrichment	sp|Q9BUZ4|TRAF4_HUMAN
21830	g9992	0.754648	0	NoEnrichment	NA
21833	g9992	0.315531	0	NoEnrichment	NA
21837	g9993	0.334345	0	NoEnrichment	NA
21838	g9993	1.15049	0	NoEnrichment	NA
21839	g9993	1.5797	0	NoEnrichment	NA
21842	g9994	0.330404	0.51764	NoEnrichment	sp|Q2W2L2|RS11_MAGSA
21843	g9994	3.78015	0.51764	Head	sp|Q2W2L2|RS11_MAGSA
21844	g9994	0.408115	0.51764	NoEnrichment	sp|Q2W2L2|RS11_MAGSA
21845	g9994	5.5594	0.51764	Head	sp|Q2W2L2|RS11_MAGSA
21846	g9994	1.12432	0.51764	Head	sp|Q2W2L2|RS11_MAGSA
21847	g9994	1.22975	0.51764	Head	sp|Q2W2L2|RS11_MAGSA
21890	g10014	-0.201313	-0.07979	NoEnrichment	sp|P55199|ELL_HUMAN
21906	g10018	-0.776963	0.16237	NoEnrichment	sp|Q4I963|COFI_GIBZE
21920	g10022	0.30407	0.08202	NoEnrichment	sp|Q91W67|UBL7_MOUSE
21980	g10047	-0.298857	-0.11185	NoEnrichment	sp|Q9UUC1|RL21A_SCHPO
22049	g10067	0.0633523	0	NoEnrichment	NA
22051	g10067	0.290922	0	NoEnrichment	NA
22153	g10106	0.00627283	-0.00772	NoEnrichment	sp|Q96PZ7|CSMD1_HUMAN
22225	g16586	0.856854	0	NoEnrichment	NA
22252	g33693	0.619424	0.18833	NoEnrichment	sp|P18428|LBP_HUMAN
22253	g33693	0.628395	0.18833	NoEnrichment	sp|P18428|LBP_HUMAN
22316	g33714	-0.0545275	0.18419	NoEnrichment	sp|Q9P2F6|RHG20_HUMAN
22379	g31978	0.15585	0.01108	NoEnrichment	sp|Q9VUW9|HIP14_DROME
22393	g31982	1.45695	0.04581	NoEnrichment	sp|Q9YHD3|BAG6A_XENLA
22456	g26540	-0.393154	0	NoEnrichment	sp|Q6R2W3|SCND3_HUMAN
22477	g21462	0.681982	0	NoEnrichment	NA
22488	g21463	0.785052	0	NoEnrichment	NA
22492	g21464	-0.60412	0	NoEnrichment	sp|Q9HCI6|K1586_HUMAN
22585	g4288	0.457961	0.01928	NoEnrichment	sp|A7RRG3|AKTIP_NEMVE
22593	g4292	0.44139	0	NoEnrichment	NA
2260	g374	0.0224524	0	NoEnrichment	NA
22632	g11186	0.996811	0	NoEnrichment	NA
22700	g11211	0.749468	0	NoEnrichment	sp|Q95SX7|RTBS_DROME
22741	g29101	0.370442	0.00292	NoEnrichment	sp|P79282|FUT8_PIG
22742	g29101	-0.442725	0.00292	NoEnrichment	sp|P79282|FUT8_PIG
22743	g29101	-0.35024	0.00292	NoEnrichment	sp|P79282|FUT8_PIG
22765	g29109	0.919751	-0.00124	NoEnrichment	sp|O60921|HUS1_HUMAN
22804	g29124	0.926921	0.16079	NoEnrichment	sp|Q96B97|SH3K1_HUMAN
22861	g29132	0.102678	-0.002	NoEnrichment	sp|Q9Y6P5|SESN1_HUMAN
22934	g29153	0.106882	0.01919	NoEnrichment	sp|Q99LZ3|SLD5_MOUSE
22936	g29153	-0.00469013	0.01919	NoEnrichment	sp|Q99LZ3|SLD5_MOUSE
2294	g387	0.439612	-0.02702	NoEnrichment	sp|Q9VXN0|GTDC1_DROME
23012	g1956	0.28821	0.00241	NoEnrichment	sp|Q95029|CATL_DROME
23086	g15825	0.442561	0.34461	NoEnrichment	sp|P41823|SY65_APLCA
23091	g15826	-0.346443	-0.13134	NoEnrichment	sp|Q16659|MK06_HUMAN
23095	g15827	1.2488	0	NoEnrichment	NA
23108	g15830	0.173084	-0.09028	NoEnrichment	sp|Q5RDG4|PDIA3_PONAB
23110	g15830	0.083697	-0.09028	NoEnrichment	sp|Q5RDG4|PDIA3_PONAB
23127	g15839	-0.18642	-0.00214	NoEnrichment	sp|Q9D305|THAP2_MOUSE
23129	g15840	-0.554881	0	NoEnrichment	sp|Q29H56|MAB21_DROPS
23144	g15841	-0.139472	-0.22032	NoEnrichment	sp|Q90705|EF2_CHICK
23160	g15856	-0.0166713	0	NoEnrichment	NA
23181	g15863	-0.139215	-0.00976	NoEnrichment	sp|Q9WUK7|OPN3_MOUSE
23211	g15881	0.261303	0.00443	NoEnrichment	sp|Q06725|N2F1A_DANRE
23215	g15881	0.531003	0.00443	NoEnrichment	sp|Q06725|N2F1A_DANRE
23220	g15882	0.74149	-0.09444	NoEnrichment	sp|Q9Z1N9|UN13B_MOUSE
23248	g15884	0.394945	0	NoEnrichment	NA
23249	g15884	-0.128052	0	NoEnrichment	NA
23252	g15884	-0.503424	0	NoEnrichment	NA
23267	g15894	-0.70663	0.32129	NoEnrichment	sp|B5ZYI7|DUT_RHILW
2328	g391	-0.559553	0	NoEnrichment	NA
23295	g15901	0.240783	0	NoEnrichment	NA
23299	g15903	-0.5493	0	NoEnrichment	sp|P21329|RTJK_DROFU
23311	g15906	0.405652	0.07142	NoEnrichment	sp|P13804|ETFA_HUMAN
23312	g15906	0.637864	0.07142	NoEnrichment	sp|P13804|ETFA_HUMAN
23330	g15911	-0.09493	0.08493	NoEnrichment	sp|Q3SZ27|MIC27_BOVIN
23334	g15913	0.534606	-0.02571	NoEnrichment	sp|Q63ZI0|KCNK9_XENLA
23358	g7335	-1.21449	0.0494	NoEnrichment	sp|Q3SYS6|CHP1_BOVIN
23411	NA	1.38211	0	NoEnrichment	NA
23448	g30805	0.356964	0	NoEnrichment	NA
23478	g31477	-0.0382288	-0.07848	NoEnrichment	sp|P17972|KCNAW_DROME
23544	g6065	0.207823	0	NoEnrichment	sp|C3YWU0|FUCO_BRAFL
2355	g15000	-0.22102	0	NoEnrichment	sp|Q6IYF9|SUCR1_RAT
23562	g6067	0.179296	0	NoEnrichment	NA
23611	g1591	1.05274	0.88884	Head	sp|Q01973|ROR1_HUMAN
23614	g1591	0.902777	0.88884	Head	sp|Q01973|ROR1_HUMAN
23615	g1591	0.223969	0.88884	NoEnrichment	sp|Q01973|ROR1_HUMAN
23616	g1591	0.583468	0.88884	Head	sp|Q01973|ROR1_HUMAN
23617	g1591	0.605677	0.88884	NoEnrichment	sp|Q01973|ROR1_HUMAN
23723	g1609	-0.511197	0	NoEnrichment	sp|P21328|RTJK_DROME
23728	g1610	1.12898	0.06276	NoEnrichment	sp|Q9ERQ8|CAH7_MOUSE
23755	g1616	0.351257	0.00047	NoEnrichment	sp|O57422|OPN4B_XENLA
23756	g1616	0.318894	0.00047	NoEnrichment	sp|O57422|OPN4B_XENLA
23762	g1619	-0.202393	0	NoEnrichment	NA
23873	g23177	-0.0735679	-0.00729	NoEnrichment	sp|P70255|NFIC_MOUSE
23876	g23177	0.660098	-0.00729	NoEnrichment	sp|P70255|NFIC_MOUSE
23877	g23177	-0.337872	-0.00729	NoEnrichment	sp|P70255|NFIC_MOUSE
23943	g27513	0.0597821	0	NoEnrichment	NA
23945	g27513	1.43307	0	NoEnrichment	NA
23946	g27513	1.31391	0	NoEnrichment	NA
23948	g27513	2.07658	0	NoEnrichment	NA
23966	NA	0.942673	0	NoEnrichment	NA
23983	g32977	-0.113851	0	NoEnrichment	NA
23996	g32981	-0.25666	-0.08733	NoEnrichment	sp|Q5ZJ56|RL7_CHICK
24000	g32982	-0.17124	-0.12488	NoEnrichment	sp|Q5R6T1|PDIA6_PONAB
24019	g32989	-0.117512	0.0396	NoEnrichment	sp|P48147|PPCE_HUMAN
2402	g15023	0.041703	-0.0024	NoEnrichment	sp|O75146|HIP1R_HUMAN
24027	g32989	-0.120259	0.0396	NoEnrichment	sp|P48147|PPCE_HUMAN
24034	g32990	0.271575	0	NoEnrichment	NA
24043	g32991	0.669622	0.01384	NoEnrichment	sp|Q9Y6I9|TX264_HUMAN
24045	g32992	-0.349604	0	NoEnrichment	NA
24064	g32997	-0.326236	-0.17201	NoEnrichment	sp|P51554|EF1A_HYDVU
24068	g33001	-0.225133	-0.07726	NoEnrichment	sp|A1A4J1|PFKAL_BOVIN
24108	g33019	-0.351244	0	NoEnrichment	NA
24109	g33020	0.324417	0	NoEnrichment	NA
2414	g15025	-0.198897	0.00017	NoEnrichment	sp|O75146|HIP1R_HUMAN
24156	g25396	0.559812	0	NoEnrichment	NA
24182	g12066	-0.471087	0	NoEnrichment	NA
24184	g26195	0.442371	0	NoEnrichment	NA
24194	g11780	0.425721	-0.1178	NoEnrichment	sp|Q62445|SP4_MOUSE
24196	g11780	-0.390026	-0.1178	NoEnrichment	sp|Q62445|SP4_MOUSE
24198	g11780	0.192794	-0.1178	NoEnrichment	sp|Q62445|SP4_MOUSE
24213	g11787	-0.318639	-0.02819	NoEnrichment	sp|Q9NSI2|F207A_HUMAN
24254	g11800	0.139103	0	NoEnrichment	NA
24367	g11860	-0.0804247	0	NoEnrichment	NA
24368	g11860	-0.219065	0	NoEnrichment	NA
24391	g11868	-0.0109243	0	NoEnrichment	NA
24393	g11868	0.65689	0	NoEnrichment	NA
24490	g1275	1.03654	0.19333	Head	sp|P27918|PROP_HUMAN
24506	g1275	-1.42748	0.19333	NoEnrichment	sp|P27918|PROP_HUMAN
24507	g1275	-1.24036	0.19333	NoEnrichment	sp|P27918|PROP_HUMAN
24511	g1276	-1.82151	0.31574	NoEnrichment	sp|Q96RW7|HMCN1_HUMAN
24512	g1276	-1.78576	0.31574	NoEnrichment	sp|Q96RW7|HMCN1_HUMAN
24514	g1276	-2.05257	0.31574	NoEnrichment	sp|Q96RW7|HMCN1_HUMAN
24515	g1276	-1.56214	0.31574	NoEnrichment	sp|Q96RW7|HMCN1_HUMAN
24516	g1276	-1.55498	0.31574	NoEnrichment	sp|Q96RW7|HMCN1_HUMAN
24517	g1276	-1.98981	0.31574	NoEnrichment	sp|Q96RW7|HMCN1_HUMAN
24518	g1276	-1.57702	0.31574	NoEnrichment	sp|Q96RW7|HMCN1_HUMAN
24520	g1276	-0.989975	0.31574	NoEnrichment	sp|Q96RW7|HMCN1_HUMAN
24552	g14127	-0.279345	0	NoEnrichment	NA
24596	g6382	0.315576	0.03791	NoEnrichment	sp|Q19269|NAS14_CAEEL
24612	g6386	0.067549	0	NoEnrichment	NA
24624	g6387	-0.251852	-0.01152	NoEnrichment	sp|P08183|MDR1_HUMAN
24647	g31517	-0.368738	0.619	NoEnrichment	sp|Q96RW7|HMCN1_HUMAN
2465	g15047	-0.544414	0	NoEnrichment	NA
24700	g31543	0.165803	-0.01029	NoEnrichment	sp|A3KCL7|OXDD_PIG
24721	g31546	-0.437096	0	NoEnrichment	NA
24749	g8539	-0.106034	0	NoEnrichment	NA
24793	g19642	-0.00115051	0	NoEnrichment	sp|Q5SVZ6|ZMYM1_HUMAN
24800	g33594	-0.501096	0.00329	NoEnrichment	sp|Q7Z494|NPHP3_HUMAN
2487	g15052	0.457846	0	NoEnrichment	NA
24981	g26297	0.526753	0.64497	NoEnrichment	sp|Q6VMQ6|MCAF1_HUMAN
24988	g26299	-0.66226	0.00601	NoEnrichment	sp|Q9NR09|BIRC6_HUMAN
2499	g15060	0.139393	0	NoEnrichment	NA
24997	g26307	0.0446016	0	NoEnrichment	NA
25011	g20580	-0.684039	0.14982	NoEnrichment	sp|Q9U943|APLP_LOCMI
25012	g20580	-0.818224	0.14982	NoEnrichment	sp|Q9U943|APLP_LOCMI
25013	g20580	-0.770992	0.14982	NoEnrichment	sp|Q9U943|APLP_LOCMI
25014	g20581	-0.839791	0.02224	NoEnrichment	sp|Q9U943|APLP_LOCMI
25015	g20581	-0.678137	0.02224	NoEnrichment	sp|Q9U943|APLP_LOCMI
25043	g20596	0.233942	0	NoEnrichment	NA
25064	g27042	-0.0445395	0	NoEnrichment	NA
25068	g27043	-0.558605	0	NoEnrichment	NA
25093	g9416	0.516172	0	NoEnrichment	NA
25116	g6091	-0.0716771	0	NoEnrichment	sp|P21328|RTJK_DROME
2513	g7609	-0.377713	0.34961	NoEnrichment	sp|Q95029|CATL_DROME
25145	g6109	0.43231	-0.02695	NoEnrichment	sp|Q3TCT4|ENTP7_MOUSE
25152	g6116	0.0532966	0.07063	NoEnrichment	sp|Q8WX94|NALP7_HUMAN
2517	g7619	-0.677524	0	NoEnrichment	NA
2518	g7620	-0.587043	0	NoEnrichment	NA
25197	g6131	0.103465	-0.95766	NoEnrichment	sp|O73853|CP17A_ICTPU
25199	g6131	0.944312	-0.95766	NoEnrichment	sp|O73853|CP17A_ICTPU
25200	g6131	0.79554	-0.95766	NoEnrichment	sp|O73853|CP17A_ICTPU
25201	g6131	2.9533	-0.95766	NoEnrichment	sp|O73853|CP17A_ICTPU
25218	g6134	0.614932	0	NoEnrichment	sp|Q7LHG5|YI31B_YEAST
25219	g6134	1.55739	0	NoEnrichment	sp|Q7LHG5|YI31B_YEAST
25238	g6138	0.213362	0	NoEnrichment	NA
25252	g6141	-0.661245	-0.09936	NoEnrichment	sp|Q4UMH6|Y381_RICFE
25255	g6142	-0.421701	-0.06619	NoEnrichment	sp|Q04202|TCB2_CAEBR
25256	g6142	-0.248923	-0.06619	NoEnrichment	sp|Q04202|TCB2_CAEBR
25279	g6147	-0.237138	0	NoEnrichment	sp|P21328|RTJK_DROME
25306	g6163	-0.164591	0	NoEnrichment	NA
25309	g6164	1.1383	0.00639	NoEnrichment	sp|Q9UHC6|CNTP2_HUMAN
25310	g6164	1.26169	0.00639	NoEnrichment	sp|Q9UHC6|CNTP2_HUMAN
25317	g6167	0.0277893	0.45681	NoEnrichment	sp|Q8BH04|PCKGM_MOUSE
25322	g6167	-1.03535	0.45681	NoEnrichment	sp|Q8BH04|PCKGM_MOUSE
25328	g6168	1.14695	0.00077	NoEnrichment	sp|P49263|PXN1_XENLA
25353	g6172	0.661985	0.00236	NoEnrichment	sp|P0DOC8|CH037_DANRE
25365	g6176	0.391737	0	NoEnrichment	NA
2537	g7626	-0.278406	0.13229	NoEnrichment	sp|Q40302|CALM_MACPY
2538	g7626	-0.476399	0.13229	NoEnrichment	sp|Q40302|CALM_MACPY
25384	g6178	-0.533577	0	NoEnrichment	sp|Q9UJ78|ZMYM5_HUMAN
25409	g6189	0.0934562	0	NoEnrichment	NA
2543	g7629	-0.171788	0.03447	NoEnrichment	sp|Q6NYB7|RAB1A_RAT
25520	g25531	-0.100872	0	NoEnrichment	NA
25542	g6706	-0.372087	0	NoEnrichment	NA
25552	g6707	0.447897	0.00126	NoEnrichment	sp|Q9UGT4|SUSD2_HUMAN
2556	g7633	-0.155406	-0.03985	NoEnrichment	sp|Q5SX19|PIGL_MOUSE
2559	g7634	0.634901	0.00552	NoEnrichment	sp|Q08AW4|PKHM3_XENLA
256	g18935	0.392678	0.18024	NoEnrichment	sp|P30940|5HT1F_RAT
25610	g10633	-1.29398	0	NoEnrichment	sp|P35072|TCB1_CAEBR
25648	g10650	0.736156	-0.04725	NoEnrichment	sp|Q7LL04|YQK1_SCHPO
25673	g10655	-0.0986028	0	NoEnrichment	NA
25708	g10675	1.15429	0	NoEnrichment	NA
25725	g10680	0.845669	-1.43203	NoEnrichment	sp|H2A0N9|KCP4_PINMG
25726	g10680	0.662317	-1.43203	NoEnrichment	sp|H2A0N9|KCP4_PINMG
25727	g10680	0.672079	-1.43203	NoEnrichment	sp|H2A0N9|KCP4_PINMG
25728	g10680	1.02765	-1.43203	NoEnrichment	sp|H2A0N9|KCP4_PINMG
25748	g4990	0.301569	0	NoEnrichment	NA
25857	g33566	-0.0345004	0.00725	NoEnrichment	sp|P41743|KPCI_HUMAN
25881	g33575	0.329286	0	NoEnrichment	NA
25884	g33575	0.537311	0	NoEnrichment	NA
25899	g33581	0.0375692	0	NoEnrichment	NA
25900	g33581	-0.0150016	0	NoEnrichment	NA
2591	g7646	-0.289046	0	NoEnrichment	NA
25962	g7798	-0.120324	0	NoEnrichment	NA
25985	g7808	-0.790849	0	NoEnrichment	NA
25988	g7810	0.374433	0.08447	NoEnrichment	sp|Q9I830|KCNA2_ONCMY
25994	g7810	-0.0349739	0.08447	NoEnrichment	sp|Q9I830|KCNA2_ONCMY
26011	g7815	-0.584421	0	NoEnrichment	sp|Q04202|TCB2_CAEBR
26050	g7825	0.517164	-0.01711	NoEnrichment	sp|A1A5V9|ELP5_DANRE
26055	g7827	0.194564	0	NoEnrichment	sp|Q95SX7|RTBS_DROME
26058	g7829	0.201871	0.09919	NoEnrichment	sp|Q6AX60|PTHB1_XENLA
26059	g7829	-0.600892	0.09919	NoEnrichment	sp|Q6AX60|PTHB1_XENLA
26066	g7832	0.239403	0.00949	NoEnrichment	sp|O95267|GRP1_HUMAN
26068	g7832	0.548805	0.00949	NoEnrichment	sp|O95267|GRP1_HUMAN
26084	g7838	0.740384	0	NoEnrichment	NA
26085	g7838	0.48612	0	NoEnrichment	NA
26108	g7843	-0.351231	0	NoEnrichment	NA
26161	g22869	1.37241	0	NoEnrichment	NA
26183	g22875	0.391329	0	NoEnrichment	NA
2622	g7652	0.677227	-0.05857	NoEnrichment	sp|Q52KG5|KI26A_MOUSE
2623	g7652	-0.315241	-0.05857	NoEnrichment	sp|Q52KG5|KI26A_MOUSE
2624	g7652	0.161929	-0.05857	NoEnrichment	sp|Q52KG5|KI26A_MOUSE
2625	g7652	1.67497	-0.05857	NoEnrichment	sp|Q52KG5|KI26A_MOUSE
2626	g7652	0.600867	-0.05857	NoEnrichment	sp|Q52KG5|KI26A_MOUSE
2627	g7652	-1.03416	-0.05857	NoEnrichment	sp|Q52KG5|KI26A_MOUSE
26279	g9269	0.503896	-0.40019	NoEnrichment	sp|Q14192|FHL2_HUMAN
26323	g11659	0.305099	-0.00418	NoEnrichment	sp|Q9NQG7|HPS4_HUMAN
26328	g11659	-0.497717	-0.00418	NoEnrichment	sp|Q9NQG7|HPS4_HUMAN
26330	g11659	-0.343591	-0.00418	NoEnrichment	sp|Q9NQG7|HPS4_HUMAN
26368	g11670	-0.359052	0.03473	NoEnrichment	sp|Q4FAT7|BGLR_PIG
26385	g11692	0.750623	0.0458	NoEnrichment	sp|Q9JJC6|RIPL1_MOUSE
26388	g11694	0.900719	0.19894	NoEnrichment	sp|P39921|TPM1_HYDVU
26392	g11696	0.177034	1.60121	NoEnrichment	sp|P39921|TPM1_HYDVU
26393	g11696	-0.0717035	1.60121	NoEnrichment	sp|P39921|TPM1_HYDVU
26394	g11696	0.863775	1.60121	Head	sp|P39921|TPM1_HYDVU
26427	g11711	0.711128	0	NoEnrichment	NA
26457	g25247	0.433527	0.00795	NoEnrichment	sp|P18915|CAH6_BOVIN
26464	g25248	0.026037	0.00858	NoEnrichment	sp|Q8UWA5|CAH2_TRIHK
26499	g25257	-0.121371	0	NoEnrichment	NA
26523	g17028	-0.0603507	0	NoEnrichment	NA
26542	g16603	-0.144258	0	NoEnrichment	NA
26589	g16622	-0.0813342	-0.03981	NoEnrichment	sp|Q9Y6A4|CFA20_HUMAN
26620	g16632	-0.604119	0	NoEnrichment	NA
26661	NA	-0.512459	0	NoEnrichment	NA
26678	g21311	1.58201	-0.00621	NoEnrichment	sp|Q9U539|OCT1_CAEEL
26796	g26083	1.26232	-0.00405	NoEnrichment	sp|P51399|LOX5_MESAU
26802	g26084	0.914323	-0.04645	NoEnrichment	sp|Q9Z2X3|PSD10_RAT
2688	g6723	0.290732	0	NoEnrichment	NA
26900	g16288	0.758419	0.03185	NoEnrichment	sp|Q28H35|DAND5_XENTR
26901	g16288	0.0161254	0.03185	NoEnrichment	sp|Q28H35|DAND5_XENTR
26903	g16289	0.28829	0	NoEnrichment	NA
26911	g16296	0.0124594	0	NoEnrichment	NA
26922	g16299	0.221327	0.22989	NoEnrichment	sp|Q9QWG7|ST1B1_MOUSE
26958	g28509	-0.16768	-0.00592	NoEnrichment	sp|Q02974|KHK_RAT
26966	g28511	-0.00358558	0	NoEnrichment	NA
26968	g28512	-0.26502	0	NoEnrichment	NA
26971	g28512	0.0322703	0	NoEnrichment	NA
27009	g12685	1.1235	0.01077	NoEnrichment	sp|Q3U481|MFS12_MOUSE
27011	g12685	0.926258	0.01077	NoEnrichment	sp|Q3U481|MFS12_MOUSE
27128	g9430	0.47031	0	NoEnrichment	NA
2715	g6732	0.584387	0.04099	NoEnrichment	sp|Q54KA7|SECG_DICDI
2717	g6732	0.549466	0.04099	NoEnrichment	sp|Q54KA7|SECG_DICDI
27236	g9247	0.376686	0.10526	NoEnrichment	sp|Q16982|NECX_APLCA
27288	g2880	0.333852	0	NoEnrichment	NA
27289	g2880	-0.145757	0	NoEnrichment	NA
27343	g21337	-0.411555	0	NoEnrichment	NA
27361	g1957	0.916949	0	NoEnrichment	sp|Q8C1R0|TSSK5_MOUSE
27392	g1967	-0.0779787	0.01023	NoEnrichment	sp|Q2TA16|CCD65_BOVIN
27525	g2061	-0.150514	0.00081	NoEnrichment	sp|Q8VHN7|GPR98_MOUSE
27529	g2062	1.3544	0	NoEnrichment	NA
27551	g2069	1.01358	0	NoEnrichment	NA
27552	g2069	0.703888	0	NoEnrichment	NA
27672	g28482	0.318291	0.00848	NoEnrichment	sp|Q8BW72|KDM4A_MOUSE
2768	g6754	0.107242	0	NoEnrichment	NA
27688	g28490	1.24085	-0.03092	NoEnrichment	sp|B5DG67|WDR12_SALSA
27694	g28492	-0.0773241	0.00979	NoEnrichment	sp|D3Z8N4|KLH20_RAT
27698	g28492	0.366498	0.00979	NoEnrichment	sp|D3Z8N4|KLH20_RAT
27729	g28505	1.04846	0	NoEnrichment	sp|O60290|ZN862_HUMAN
27783	g7936	0.313124	-0.00709	NoEnrichment	sp|Q91175|ADA1A_ORYLA
27793	g7938	0.106297	0.43312	NoEnrichment	sp|Q7RTX9|MOT14_HUMAN
27848	g23129	1.52824	0	NoEnrichment	NA
27853	g23129	-0.0678247	0	NoEnrichment	NA
27873	g23134	-0.152349	0.0303	NoEnrichment	sp|Q52KK3|S2551_RAT
27956	g11467	-0.143078	0	NoEnrichment	NA
27966	g11470	1.45134	0.10354	NoEnrichment	sp|Q96LW9|ZSC31_HUMAN
27967	g11470	0.920871	0.10354	NoEnrichment	sp|Q96LW9|ZSC31_HUMAN
27969	g11470	0.707798	0.10354	NoEnrichment	sp|Q96LW9|ZSC31_HUMAN
27970	g11470	0.585072	0.10354	NoEnrichment	sp|Q96LW9|ZSC31_HUMAN
27971	g11470	0.977382	0.10354	NoEnrichment	sp|Q96LW9|ZSC31_HUMAN
27972	g11470	0.635431	0.10354	NoEnrichment	sp|Q96LW9|ZSC31_HUMAN
27981	g11471	0.756267	0.37037	NoEnrichment	sp|P24044|CALM_PLAFA
2803	g6758	0.341621	0	NoEnrichment	sp|Q91EK3|REP_GOCV
28079	g30639	-0.323973	0.02023	NoEnrichment	sp|Q20191|NAS13_CAEEL
28105	g30647	-0.225108	-0.00074	NoEnrichment	sp|P55115|NAS15_CAEEL
28247	g32440	-0.318936	-0.00646	NoEnrichment	sp|Q4R7L3|PRS6B_MACFA
28257	g32443	0.393069	0	NoEnrichment	NA
28258	g32443	-0.402697	0	NoEnrichment	NA
28320	g10852	-0.008807	0.02265	NoEnrichment	sp|Q9NRR4|RNC_HUMAN
28330	g10853	0.016565	0.02432	NoEnrichment	sp|Q5HZJ0|RNC_MOUSE
28333	g10854	0.398428	-0.0073	NoEnrichment	sp|Q4QQY7|TGT_XENLA
28346	g21617	-0.3851	0	NoEnrichment	NA
28366	g21617	-0.0328599	0	NoEnrichment	NA
28426	g4694	-0.55694	0	NoEnrichment	NA
28478	g9091	0.22685	0.19671	NoEnrichment	sp|Q7U6F4|RIMK_SYNPX
28489	g29665	0.432236	0	NoEnrichment	NA
28505	g29668	-0.284572	0	NoEnrichment	NA
28517	g29670	-0.14344	-0.17701	NoEnrichment	sp|Q95M18|ENPL_BOVIN
2852	g6825	0.268472	0.003	NoEnrichment	sp|Q9H0J4|QRIC2_HUMAN
28617	g28117	-0.457485	0.65128	NoEnrichment	sp|A6NMZ7|CO6A6_HUMAN
28623	g28118	0.314023	0	NoEnrichment	NA
28624	g28118	0.725332	0	NoEnrichment	NA
28628	g28118	-0.722036	0	NoEnrichment	NA
2867	g6835	-0.35118	0.10122	NoEnrichment	sp|A0JMP0|ATHL1_DANRE
28671	g11022	0.691083	0.00422	NoEnrichment	sp|Q9H6U8|ALG9_HUMAN
28699	g11029	-0.328275	0	NoEnrichment	NA
28701	g11030	-0.0949897	0	NoEnrichment	NA
28708	g11032	0.0281937	0	NoEnrichment	NA
28711	g11032	0.674215	0	NoEnrichment	NA
28778	NA	0.320017	0	NoEnrichment	NA
28801	g29167	1.46313	0.03387	NoEnrichment	sp|A0JMY5|NFXL1_XENLA
2881	g6839	-0.404351	0.00976	NoEnrichment	sp|Q05944|HSP70_HYDVU
28827	g29176	0.336907	0.02262	NoEnrichment	sp|Q9VZS6|NSMA_DROME
28844	g29180	0.152128	-0.00394	NoEnrichment	sp|P12258|HOBOT_DROME
28876	g29199	0.0402458	0	NoEnrichment	NA
28905	g23249	0.813396	0	NoEnrichment	NA
28911	g23252	1.15977	0.05273	NoEnrichment	sp|P23508|CRCM_HUMAN
28925	g23256	0.78078	0.00667	NoEnrichment	sp|Q8BH31|MFSD8_MOUSE
28926	g23256	1.0953	0.00667	NoEnrichment	sp|Q8BH31|MFSD8_MOUSE
28929	g23256	-0.117145	0.00667	NoEnrichment	sp|Q8BH31|MFSD8_MOUSE
28954	g23268	0.149287	0.1712	NoEnrichment	sp|O94827|PKHG5_HUMAN
28968	g23270	0.118477	0.14915	NoEnrichment	sp|Q7ZTV5|FSHR_CAIMO
28980	g23271	-0.108117	-0.02321	NoEnrichment	sp|Q28EW0|TM87A_XENTR
29011	g23284	-0.397099	0.19132	NoEnrichment	sp|P54288|CACB2_RABIT
29018	g23284	-0.546895	0.19132	NoEnrichment	sp|P54288|CACB2_RABIT
29019	g23285	-0.261722	0	NoEnrichment	NA
29023	g23286	-0.599919	0	NoEnrichment	NA
29024	g23287	0.0883461	0	NoEnrichment	NA
29025	g23288	0.226399	0	NoEnrichment	NA
29026	g23288	0.241529	0	NoEnrichment	NA
29072	g23296	0.565111	-0.16841	NoEnrichment	sp|Q64317|DLX1_MOUSE
2908	g6847	-0.248765	0.07662	NoEnrichment	sp|P20673|ARLY_RAT
29087	NA	0.497716	0	NoEnrichment	NA
29124	g28537	-0.0748188	0	NoEnrichment	NA
29125	g28537	-0.0107481	0	NoEnrichment	NA
29193	g28594	0.258408	0.19027	NoEnrichment	sp|Q9Z2I4|ROBO3_MOUSE
29223	g28606	-0.0793081	0.28887	NoEnrichment	sp|Q06507|ATF4_MOUSE
29248	g28610	0.131006	-0.00045	NoEnrichment	sp|Q9H1Y3|OPN3_HUMAN
29249	g28610	0.658601	-0.00045	NoEnrichment	sp|Q9H1Y3|OPN3_HUMAN
29267	g28615	-0.204731	0.12797	NoEnrichment	sp|Q0V8S0|HGS_BOVIN
29276	g28616	0.247515	0.00546	NoEnrichment	sp|Q80VP0|TCPR1_MOUSE
29334	g28639	-0.232666	0	NoEnrichment	NA
2938	g32638	0.0929528	0.27701	NoEnrichment	sp|Q98925|IRF2_CHICK
29387	g28647	-0.630932	0.04293	NoEnrichment	sp|Q5T2S8|ARMC4_HUMAN
29402	g28653	0.388646	0	NoEnrichment	NA
29473	g28682	0.576495	1.22688	NoEnrichment	sp|Q95NR9|CALM_METSE
2949	g32648	0.964043	-0.01049	NoEnrichment	sp|Q8CE96|TRM6_MOUSE
29521	g28700	-0.732045	0.22449	NoEnrichment	sp|Q9NXK6|MPRG_HUMAN
29556	g21447	-0.253694	0	NoEnrichment	sp|P55344|LMIP_HUMAN
29582	g1736	0.28507	0	NoEnrichment	NA
29583	g1736	-0.382548	0	NoEnrichment	NA
29596	g19241	0.259242	0	NoEnrichment	sp|Q80WQ9|ZBED4_MOUSE
29637	g15629	-0.218434	0.09315	NoEnrichment	sp|P18519|TNR16_CHICK
2964	g32652	-0.293379	0	NoEnrichment	NA
29648	g15630	-0.179204	-1.59152	NoEnrichment	sp|H2A0N9|KCP4_PINMG
29653	g15630	0.372761	-1.59152	NoEnrichment	sp|H2A0N9|KCP4_PINMG
29658	g15631	-0.26233	-1.78451	NoEnrichment	sp|P0CJ14|VP302_LYCMC
29661	g15631	-0.313599	-1.78451	NoEnrichment	sp|P0CJ14|VP302_LYCMC
29685	g15636	0.781464	0.75975	NoEnrichment	sp|P42577|FRIS_LYMST
29692	g15638	0.236997	0	NoEnrichment	NA
29722	g3467	0.0363637	0	NoEnrichment	NA
29725	g3468	-0.725474	0	NoEnrichment	NA
29735	g3473	0.305026	0.06077	NoEnrichment	sp|O15127|SCAM2_HUMAN
29806	g3515	-0.73016	0.00502	NoEnrichment	sp|A7S3I2|BBIP1_NEMVE
29808	g3515	-0.293192	0.00502	NoEnrichment	sp|A7S3I2|BBIP1_NEMVE
29816	g3517	-0.45962	0	NoEnrichment	NA
29842	g3525	0.00056825	0	NoEnrichment	NA
29852	g3528	-0.288471	-0.12623	NoEnrichment	sp|Q25189|GBLP_HYDVU
29853	g3528	-0.0923012	-0.12623	NoEnrichment	sp|Q25189|GBLP_HYDVU
29869	g3530	0.100733	0.00204	NoEnrichment	sp|P30825|CTR1_HUMAN
29881	g3534	-0.327009	0.00718	NoEnrichment	sp|Q5XIH9|HPDL_RAT
29931	g3549	0.573497	0	NoEnrichment	NA
29954	g3553	1.18102	0.76945	Head	sp|A0LMC1|PHNX_SYNFM
29982	g3561	-0.227599	0	NoEnrichment	NA
29985	g3562	0.755715	0	NoEnrichment	NA
29986	g3562	0.547102	0	NoEnrichment	NA
29997	g3564	-0.337623	0.00838	NoEnrichment	sp|Q6V0I7|FAT4_HUMAN
30018	g3566	0.597593	0	NoEnrichment	NA
30024	g3568	-0.875387	0.06084	NoEnrichment	sp|O35490|BHMT1_MOUSE
30040	g28088	-0.185099	0	NoEnrichment	NA
3008	g798	-0.645054	0	NoEnrichment	NA
30144	g19367	0.604323	0	NoEnrichment	NA
30162	g19368	0.702667	0.02334	NoEnrichment	sp|Q12882|DPYD_HUMAN
30165	g19369	1.16327	-0.00737	NoEnrichment	sp|Q28007|DPYD_BOVIN
3023	g800	-0.296144	0	NoEnrichment	NA
30238	g33270	0.0294801	-0.01145	NoEnrichment	sp|Q13367|AP3B2_HUMAN
30239	g33271	-0.434461	0	NoEnrichment	NA
30246	g33271	0.51148	0	NoEnrichment	NA
30315	g33299	-1.06543	0	NoEnrichment	NA
30348	g16588	0.333975	0	NoEnrichment	NA
30350	g16590	0.0178283	0	NoEnrichment	NA
30355	g16598	-0.169921	0	NoEnrichment	NA
30383	g26848	1.38896	0	NoEnrichment	NA
30388	g26850	0.645997	0	NoEnrichment	NA
30427	NA	-1.18113	0	NoEnrichment	NA
30451	g32665	0.314399	0	NoEnrichment	sp|Q9VFK6|KMT5A_DROME
30462	g32666	-0.0853143	0	NoEnrichment	NA
30493	g5294	-0.21589	0	NoEnrichment	NA
30539	g2033	-0.58635	0	NoEnrichment	NA
30551	g2036	-0.203997	-0.14396	NoEnrichment	sp|P61359|RL27_HIPCM
30580	g2041	-0.0931449	0.00521	NoEnrichment	sp|Q93127|GPR18_AMPAM
30581	g2041	-0.0280246	0.00521	NoEnrichment	sp|Q93127|GPR18_AMPAM
30596	g2044	-0.407414	0	NoEnrichment	NA
306	g18951	0.036406	0.23756	NoEnrichment	sp|P38571|LICH_HUMAN
30661	g25322	0.00993378	0	NoEnrichment	sp|O60290|ZN862_HUMAN
30713	g26572	-0.629918	-0.01399	NoEnrichment	sp|Q2QUN2|LAC24_ORYSJ
30716	g26572	0.580656	-0.01399	NoEnrichment	sp|Q2QUN2|LAC24_ORYSJ
30725	g26574	0.762159	0	NoEnrichment	NA
30743	g26583	0.0198769	0.0132	NoEnrichment	sp|Q68CZ2|TENS3_HUMAN
30747	g26583	0.209139	0.0132	NoEnrichment	sp|Q68CZ2|TENS3_HUMAN
30870	g8646	0.734719	0	NoEnrichment	NA
30881	g8647	-0.480278	0	NoEnrichment	sp|Q14767|LTBP2_HUMAN
30902	g8658	-0.317309	0	NoEnrichment	sp|A2ASQ1|AGRIN_MOUSE
30971	g17902	-0.438294	-0.08436	NoEnrichment	sp|Q90YT3|RL35A_ICTPU
30978	g2729	-0.360236	0	NoEnrichment	NA
31004	g3893	-1.34e-05	-0.54317	NoEnrichment	sp|Q8GXG1|ASPGB_ARATH
31006	g3893	0.469758	-0.54317	NoEnrichment	sp|Q8GXG1|ASPGB_ARATH
31046	g3921	1.18658	0.13124	NoEnrichment	sp|Q8BTM8|FLNA_MOUSE
31048	g3921	-0.136044	0.13124	NoEnrichment	sp|Q8BTM8|FLNA_MOUSE
31060	g3921	-0.374063	0.13124	NoEnrichment	sp|Q8BTM8|FLNA_MOUSE
31153	g3949	0.327842	0	NoEnrichment	NA
31216	g13188	0.00526998	0	NoEnrichment	NA
31225	g13190	1.28515	0.06458	NoEnrichment	sp|Q8MIZ3|DCPS_PIG
31229	g13191	0.321108	0	NoEnrichment	NA
31260	g13195	-0.0907358	0	NoEnrichment	NA
31339	g28874	-0.183909	0	NoEnrichment	NA
314	g18952	1.19103	0.02997	NoEnrichment	sp|O15072|ATS3_HUMAN
31415	g13265	0.288279	0	NoEnrichment	NA
31470	g17706	-0.127035	0	NoEnrichment	NA
31514	g17730	-0.303882	-0.0363	NoEnrichment	sp|Q8N2M4|TM86A_HUMAN
31533	g17742	-0.0178372	0.00458	NoEnrichment	sp|Q5IS41|NCAN_PANTR
31538	g17742	0.593814	0.00458	NoEnrichment	sp|Q5IS41|NCAN_PANTR
3155	g27050	0.839024	0	NoEnrichment	NA
31570	g17754	0.0279429	-0.00219	NoEnrichment	sp|Q7Z2H8|S36A1_HUMAN
31600	g17760	0.23175	0	NoEnrichment	NA
31604	g23079	0.26734	0	NoEnrichment	NA
31607	g23079	0.89725	0	NoEnrichment	NA
31621	g23080	-0.832946	0.13392	NoEnrichment	sp|Q5U3Q6|CIP4_DANRE
3167	g27055	0.370848	0	NoEnrichment	NA
31693	g23119	0.0658738	-0.00503	NoEnrichment	sp|Q6P7A9|LYAG_RAT
31704	g25303	-0.620785	0	NoEnrichment	NA
31705	g25303	-0.118316	0	NoEnrichment	NA
31807	g28054	-0.472154	0	NoEnrichment	NA
31891	g3833	1.05968	0.00871	NoEnrichment	sp|Q99595|TI17A_HUMAN
31945	g26586	0.361064	0	NoEnrichment	NA
31950	g26586	-0.155949	0	NoEnrichment	NA
31982	g1318	1.16582	0	NoEnrichment	NA
31987	g1319	1.94289	0	NoEnrichment	NA
320	g18954	0.240049	0.00207	NoEnrichment	sp|A8WIP6|CDK20_DANRE
32069	NA	0.124527	0	NoEnrichment	NA
3207	g20037	0.464013	0	NoEnrichment	NA
3209	g20037	0.43654	0	NoEnrichment	NA
3211	g20037	0.975992	0	NoEnrichment	NA
3212	g20037	1.46409	0	NoEnrichment	NA
3213	g20037	0.825396	0	NoEnrichment	NA
32175	g14614	0.366935	0.02492	NoEnrichment	sp|O35841|API5_MOUSE
32224	NA	-0.151692	0	NoEnrichment	NA
32246	g29544	-0.217849	0	NoEnrichment	sp|O14656|TOR1A_HUMAN
32336	g29578	-0.263466	0.48946	NoEnrichment	sp|P50538|MAD1_MOUSE
32337	g29578	-0.499421	0.48946	NoEnrichment	sp|P50538|MAD1_MOUSE
32352	NA	-0.133245	0	NoEnrichment	NA
32428	g29057	0.123753	0	NoEnrichment	NA
3243	g20042	-0.195278	0.00945	NoEnrichment	sp|Q66IY8|I2BLA_XENLA
32433	g29060	0.284666	0	NoEnrichment	NA
3249	g20043	0.561515	0	NoEnrichment	NA
32491	g7855	0.536851	0	NoEnrichment	NA
32569	g21748	-0.285067	0.04052	NoEnrichment	sp|O94988|FA13A_HUMAN
32637	g17403	-0.310321	0	NoEnrichment	NA
32656	g17407	-0.149571	0	NoEnrichment	NA
32710	g32887	-0.26557	0	NoEnrichment	NA
32718	g32887	0.774992	0	NoEnrichment	NA
32735	g31263	-0.173682	0	NoEnrichment	NA
32765	g30155	1.21984	0	NoEnrichment	NA
32768	g30155	0.359665	0	NoEnrichment	NA
32785	g17479	-0.349199	0	NoEnrichment	sp|Q3UHD1|BAI1_MOUSE
32790	g17479	-0.610554	0	NoEnrichment	sp|Q3UHD1|BAI1_MOUSE
32811	g17485	0.349779	-0.10271	NoEnrichment	sp|Q9DE27|RUVB2_XENLA
32831	g17491	-0.0784834	-0.00743	NoEnrichment	sp|E2JA28|DDAC_ENTAG
32855	g17500	-0.062084	0.05828	NoEnrichment	sp|Q9BXF3|CECR2_HUMAN
32868	g17501	-1.18096	0	NoEnrichment	NA
32916	g17513	-0.774433	0	NoEnrichment	NA
32964	g2656	0.863212	0	NoEnrichment	NA
32992	g2661	0.135715	-0.04478	NoEnrichment	sp|Q60467|CO5A1_CRILO
33023	g21056	-0.301087	-0.06724	NoEnrichment	sp|Q29RV1|PDIA4_BOVIN
33052	g18074	-0.0121064	0.17121	NoEnrichment	sp|Q3UU96|MRCKA_MOUSE
33112	g18096	-0.303456	0	NoEnrichment	NA
33139	g18101	0.310386	0	NoEnrichment	NA
33265	g18162	0.53211	0	NoEnrichment	NA
33343	g18184	-0.128602	0	NoEnrichment	NA
33393	g18200	1.14566	-0.17093	NoEnrichment	sp|Q99578|RIT2_HUMAN
33407	g33373	3.57812	0.96567	Head	sp|P56706|WNT7B_HUMAN
33408	g33373	1.48288	0.96567	Head	sp|P56706|WNT7B_HUMAN
33409	g33373	1.67208	0.96567	Head	sp|P56706|WNT7B_HUMAN
33442	g33377	0.183352	0	NoEnrichment	sp|Q8LA13|RH11_ARATH
33448	g33380	0.321252	0.01265	NoEnrichment	sp|B5XBI1|IF43A_SALSA
33452	g33381	0.210162	0.00305	NoEnrichment	sp|Q0V9L1|MMS19_XENTR
33473	g33393	0.620013	0	NoEnrichment	NA
33474	g33393	1.61905	0	NoEnrichment	NA
33483	g33394	-0.225527	0.05727	NoEnrichment	sp|Q91W89|MA2C1_MOUSE
33495	g33396	-0.172916	-0.24362	NoEnrichment	sp|Q28EM7|OTX5_XENTR
33496	g33396	0.279329	-0.24362	NoEnrichment	sp|Q28EM7|OTX5_XENTR
33498	g33396	0.607387	-0.24362	NoEnrichment	sp|Q28EM7|OTX5_XENTR
33527	g33401	-0.304625	0	NoEnrichment	NA
33550	g33404	0.251762	0	NoEnrichment	NA
33560	g33409	0.353256	0	NoEnrichment	NA
33584	g33422	1.1556	0.51786	Head	sp|Q62445|SP4_MOUSE
33585	g33422	0.370985	0.51786	NoEnrichment	sp|Q62445|SP4_MOUSE
33586	g33422	0.958423	0.51786	Head	sp|Q62445|SP4_MOUSE
33587	g33422	1.72301	0.51786	Head	sp|Q62445|SP4_MOUSE
33589	g33422	1.3274	0.51786	Head	sp|Q62445|SP4_MOUSE
33614	g33432	0.881384	0	NoEnrichment	NA
33632	g33438	0.136935	0	NoEnrichment	NA
33657	g33443	0.224425	0	NoEnrichment	NA
33674	g33445	0.988737	0.74526	Head	sp|Q28824|MYLK_BOVIN
33687	g33447	0.431461	0	NoEnrichment	NA
33756	g33464	0.663991	0	NoEnrichment	NA
33757	g33464	1.22819	0	NoEnrichment	NA
33776	g33465	0.449029	0.00963	NoEnrichment	sp|P20664|PRI1_MOUSE
33777	g33466	0.561523	-0.05199	NoEnrichment	sp|Q95LN2|CFA70_MACFA
33809	g17573	0.0216957	0	NoEnrichment	sp|Q9U0M8|YPF06_PLAF7
33811	g17574	-0.419359	0.01599	NoEnrichment	sp|C9D7C2|CAC1A_APIME
33830	g17581	-0.234034	0	NoEnrichment	sp|P56698|CAC1B_DIPOM
33875	g19961	-0.181695	-0.11621	NoEnrichment	sp|P08570|RLA1_DROME
33925	g10190	0.172746	0	NoEnrichment	sp|Q95107|WASL_BOVIN
33940	g15125	-0.0830215	0	NoEnrichment	NA
33942	g15125	0.749954	0	NoEnrichment	NA
33970	g26784	0.776765	-0.11551	NoEnrichment	sp|C9D7R3|VMPA3_LOXIN
34004	g26795	-0.510053	-0.00305	NoEnrichment	sp|Q03326|OXIR_STRAT
34027	g26798	-0.244922	-0.02599	NoEnrichment	sp|P35320|OXIR_STRLI
34036	g26801	-0.230286	0	NoEnrichment	NA
34037	g26801	-0.490442	0	NoEnrichment	NA
3406	g23541	-0.140398	-0.01172	NoEnrichment	sp|Q62798|DRGX_RAT
34082	g26813	-0.138047	0	NoEnrichment	NA
34089	g26815	0.998513	0.03567	NoEnrichment	sp|O95475|SIX6_HUMAN
34091	g26815	0.49944	0.03567	NoEnrichment	sp|O95475|SIX6_HUMAN
34108	g26819	-0.0957516	0	NoEnrichment	NA
34109	g26819	0.23177	0	NoEnrichment	NA
34126	g26833	-1.00646	0.11218	NoEnrichment	sp|P24014|SLIT_DROME
34161	g26840	-0.402481	0.33895	NoEnrichment	sp|Q566L4|ZN703_XENTR
34162	g26840	1.67274	0.33895	Head	sp|Q566L4|ZN703_XENTR
34163	g26840	0.477868	0.33895	NoEnrichment	sp|Q566L4|ZN703_XENTR
34277	g25771	-1.17472	0.10811	NoEnrichment	sp|P38977|ANTA_HYDVU
34287	g25773	-0.767086	0.06958	NoEnrichment	sp|P38977|ANTA_HYDVU
34325	g25781	-0.530535	0	NoEnrichment	NA
3433	g23544	-0.0273336	-0.00735	NoEnrichment	sp|Q9VHH9|JHD1_DROME
34360	g25802	-0.341748	0	NoEnrichment	sp|Q7LHG5|YI31B_YEAST
34382	g25814	0.0153143	0	NoEnrichment	NA
34460	g9614	-0.697221	0	NoEnrichment	NA
34467	g9617	1.73063	0.0046	NoEnrichment	sp|Q95SX7|RTBS_DROME
34489	g20686	-0.231325	0	NoEnrichment	NA
34490	g20686	-0.147407	0	NoEnrichment	NA
34493	g20686	0.00253195	0	NoEnrichment	NA
34524	g20690	-0.154678	-0.138	NoEnrichment	sp|Q6TXF1|ARRD3_RAT
34559	g20700	-0.362606	0.04818	NoEnrichment	sp|Q7TPQ9|ARRD3_MOUSE
34630	g6956	-0.316541	0	NoEnrichment	NA
34709	g6980	0.209064	0	NoEnrichment	NA
34719	g456	-0.0383221	-0.18295	NoEnrichment	sp|P42859|HD_MOUSE
34720	g456	-0.133149	-0.18295	NoEnrichment	sp|P42859|HD_MOUSE
34721	g456	0.370147	-0.18295	NoEnrichment	sp|P42859|HD_MOUSE
34722	g456	-0.453423	-0.18295	NoEnrichment	sp|P42859|HD_MOUSE
34724	g458	-0.22096	-0.00583	NoEnrichment	sp|P42859|HD_MOUSE
34725	g458	0.382971	-0.00583	NoEnrichment	sp|P42859|HD_MOUSE
34769	g472	0.0671988	-0.15127	NoEnrichment	sp|Q9TUP7|OX2R_CANLF
34776	g472	-0.124688	-0.15127	NoEnrichment	sp|Q9TUP7|OX2R_CANLF
34805	g19635	-0.109641	0.00103	NoEnrichment	sp|Q54RZ7|Y1199_DICDI
34890	g14375	0.541428	-0.0077	NoEnrichment	sp|P21328|RTJK_DROME
34922	g14380	-0.157867	0.35751	NoEnrichment	sp|O77775|NCF2_BOVIN
34928	g14380	1.04739	0.35751	NoEnrichment	sp|O77775|NCF2_BOVIN
35152	g21555	0.357489	0	NoEnrichment	NA
35159	g21556	-0.591251	0	NoEnrichment	NA
35165	g21559	-0.10688	0.18906	NoEnrichment	sp|Q9UHV9|PFD2_HUMAN
35175	g21563	-0.207566	0.01017	NoEnrichment	sp|Q9QUJ7|ACSL4_MOUSE
35248	g10576	-0.514443	0	NoEnrichment	NA
35253	g10580	-0.674644	0.12474	NoEnrichment	sp|H2LBU8|YAP1_ORYLA
35296	g4524	-0.330984	0	NoEnrichment	NA
35327	g4533	0.409691	0	NoEnrichment	NA
3534	g23571	0.368751	0	NoEnrichment	NA
35341	g4538	-0.45064	0	NoEnrichment	sp|Q9Y2W7|CSEN_HUMAN
35368	g4545	-0.375148	0	NoEnrichment	NA
35407	g4561	-0.0938762	0.05198	NoEnrichment	sp|O43660|PLRG1_HUMAN
3541	g23572	-0.441569	0	NoEnrichment	sp|P10394|POL4_DROME
35443	g4567	-0.191838	0	NoEnrichment	NA
35451	g4572	0.12952	0.07295	NoEnrichment	sp|O00299|CLIC1_HUMAN
35487	g26961	0.790278	0.1035	NoEnrichment	sp|P00976|IBPC_BOVIN
35501	g26965	-0.487578	0	NoEnrichment	sp|P14550|AK1A1_HUMAN
35531	g15574	-0.0250539	0	NoEnrichment	NA
35541	g31098	-0.0868515	-0.06142	NoEnrichment	sp|P97858|S35B1_MOUSE
35543	g31098	-0.484116	-0.06142	NoEnrichment	sp|P97858|S35B1_MOUSE
35562	g14043	0.41613	0	NoEnrichment	sp|Q95SX7|RTBS_DROME
35586	g14049	1.64966	-0.03145	NoEnrichment	sp|O00566|MPP10_HUMAN
35587	g14049	0.323722	-0.03145	NoEnrichment	sp|O00566|MPP10_HUMAN
35589	g14050	1.65937	0	NoEnrichment	NA
35591	g14050	0.696539	0	NoEnrichment	NA
3575	g23578	-0.243965	0.00031	NoEnrichment	sp|A6H619|PHRF1_MOUSE
35768	g17551	0.478812	0	NoEnrichment	NA
35844	g16165	0.914587	0.42501	Head	sp|Q61467|ZIC4_MOUSE
35846	g16165	1.81406	0.42501	Head	sp|Q61467|ZIC4_MOUSE
35859	g16168	-0.0670788	-0.21932	NoEnrichment	sp|Q90593|GRP78_CHICK
3589	g23580	-0.177527	0.0098	NoEnrichment	sp|Q8CIV8|TBCE_MOUSE
35970	g21267	-0.825981	0	NoEnrichment	sp|P08548|LIN1_NYCCO
35975	g21267	0.281615	0	NoEnrichment	sp|P08548|LIN1_NYCCO
35977	g21268	0.177138	0	NoEnrichment	NA
35982	g21270	0.700935	0.00749	NoEnrichment	sp|Q0V7M1|KPSH1_BOVIN
35988	g21272	0.570459	0	NoEnrichment	NA
35996	g21273	1.47968	0	NoEnrichment	NA
35997	g21273	0.600397	0	NoEnrichment	NA
36016	g21277	-0.143551	-0.03393	NoEnrichment	sp|P41439|FOLR3_HUMAN
36051	g8784	0.0565344	0.14753	NoEnrichment	sp|A1L1W9|MOT10_DANRE
36059	g8784	-0.868019	0.14753	NoEnrichment	sp|A1L1W9|MOT10_DANRE
36094	g9460	-0.472955	0.01383	NoEnrichment	sp|P17900|SAP3_HUMAN
36105	g21064	0.218314	0	NoEnrichment	NA
36108	g21065	-0.353919	-0.0572	NoEnrichment	sp|Q5R9A4|DNJB9_PONAB
36126	g21068	0.672759	0.02443	NoEnrichment	sp|P13634|CAH1_MOUSE
36138	g21076	0.348057	0.08439	NoEnrichment	sp|A4IIJ3|KIBRA_XENTR
36140	g21076	0.488813	0.08439	NoEnrichment	sp|A4IIJ3|KIBRA_XENTR
36142	g21076	0.48591	0.08439	NoEnrichment	sp|A4IIJ3|KIBRA_XENTR
36146	g21076	1.58399	0.08439	NoEnrichment	sp|A4IIJ3|KIBRA_XENTR
36147	g21076	0.533678	0.08439	NoEnrichment	sp|A4IIJ3|KIBRA_XENTR
36165	g21084	-0.250211	0.1054	NoEnrichment	sp|Q6W4X9|MUC6_HUMAN
36166	g21085	-0.311424	-0.64555	NoEnrichment	sp|P37235|HPCL1_HUMAN
36170	g21085	2.17825	-0.64555	NoEnrichment	sp|P37235|HPCL1_HUMAN
36189	g21088	0.542608	0.02033	NoEnrichment	sp|Q16720|AT2B3_HUMAN
36200	g21095	0.0419239	0.01075	NoEnrichment	sp|Q6IE82|JADE3_MOUSE
36255	g21118	0.302888	0	NoEnrichment	NA
36265	g21119	0.192635	0.00149	NoEnrichment	sp|Q5R7U4|GBG2_PONAB
36269	g21120	0.532916	0.24506	NoEnrichment	sp|Q99MI1|RB6I2_MOUSE
36271	g21120	0.179205	0.24506	NoEnrichment	sp|Q99MI1|RB6I2_MOUSE
36277	g21122	0.133834	0	NoEnrichment	NA
36286	g21123	0.266278	0.06665	NoEnrichment	sp|Q16720|AT2B3_HUMAN
3630	g23601	1.87313	0	NoEnrichment	NA
36311	g21128	1.45421	0	NoEnrichment	NA
36313	g21128	0.484866	0	NoEnrichment	NA
36320	g21131	-0.516328	0	NoEnrichment	NA
36340	g21140	-0.444256	0	NoEnrichment	sp|P03934|TC1A_CAEEL
36355	g21147	1.24386	0.59677	Head	sp|P79888|DCAM_XENLA
3639	g23604	1.29972	0	NoEnrichment	NA
3640	g23604	1.19076	0	NoEnrichment	NA
36409	g32534	1.54087	0	NoEnrichment	NA
36479	g32551	0.679719	0.00037	NoEnrichment	sp|Q5TCZ1|SPD2A_HUMAN
36480	g32551	2.067	0.00037	NoEnrichment	sp|Q5TCZ1|SPD2A_HUMAN
36485	g32551	-0.0757577	0.00037	NoEnrichment	sp|Q5TCZ1|SPD2A_HUMAN
36503	g32559	0.0758038	0	NoEnrichment	NA
36538	g30594	-0.02409	-0.25587	NoEnrichment	sp|Q17770|PDI2_CAEEL
36566	g30602	2.46116	0	NoEnrichment	NA
36573	g30605	0.91723	0.03163	NoEnrichment	sp|Q92179|CHST3_CHICK
3658	g23606	0.0101981	0	NoEnrichment	NA
36612	g3641	0.928527	-0.27939	NoEnrichment	sp|P11533|DMD_CHICK
3662	g23607	0.33836	0.03335	NoEnrichment	sp|Q99LS3|SERB_MOUSE
3663	g23607	0.327139	0.03335	NoEnrichment	sp|Q99LS3|SERB_MOUSE
36653	g3653	0.0449241	0.20375	NoEnrichment	sp|O01367|HOW_DROME
36684	g3660	3.34083	0	NoEnrichment	NA
36685	g3660	2.60096	0	NoEnrichment	NA
36687	g3660	1.08664	0	NoEnrichment	NA
36688	g3660	0.811854	0	NoEnrichment	NA
36701	g26390	0.561178	0	NoEnrichment	NA
36702	g26390	0.596948	0	NoEnrichment	NA
36827	g15582	0.722776	0.22328	NoEnrichment	sp|Q670P5|WNT11_XENLA
36840	g15582	0.344172	0.22328	NoEnrichment	sp|Q670P5|WNT11_XENLA
36858	g15585	2.553	0	NoEnrichment	NA
3695	g23615	0.279809	0	NoEnrichment	NA
36955	g4192	0.441129	0.00263	NoEnrichment	sp|Q08AY6|KT5AA_XENLA
3701	g23616	0.184585	0	NoEnrichment	NA
37035	g15120	-1.5515	-0.10843	NoEnrichment	sp|Q9CWS0|DDAH1_MOUSE
37038	g15120	0.389675	-0.10843	NoEnrichment	sp|Q9CWS0|DDAH1_MOUSE
3707	g23616	-0.49126	0	NoEnrichment	NA
37098	g27001	1.17348	0	NoEnrichment	NA
37102	g27003	-0.116486	0	NoEnrichment	NA
37107	g27008	0.621721	-0.05125	NoEnrichment	sp|Q9WV54|ASAH1_MOUSE
37126	g27009	-0.227838	0.04387	NoEnrichment	sp|A3KQV2|BROX_DANRE
37162	g27032	0.931389	0	NoEnrichment	NA
37215	g4299	-0.352008	0.06039	NoEnrichment	sp|Q9UDY8|MALT1_HUMAN
37220	g4300	0.0548424	-0.03694	NoEnrichment	sp|Q8BH60|GOPC_MOUSE
37258	g4304	1.37989	0.09341	NoEnrichment	sp|Q04771|ACVR1_HUMAN
37259	g4304	0.714691	0.09341	NoEnrichment	sp|Q04771|ACVR1_HUMAN
37321	g4318	0.600502	0	NoEnrichment	NA
37327	g4318	0.362472	0	NoEnrichment	NA
37334	g4319	1.081	0	NoEnrichment	NA
37335	g4319	0.82204	0	NoEnrichment	NA
37338	g4319	0.271158	0	NoEnrichment	NA
37340	g4319	0.284773	0	NoEnrichment	NA
37343	g4319	0.373391	0	NoEnrichment	NA
37345	g4319	0.427345	0	NoEnrichment	NA
37348	g4324	0.0871549	-0.10789	NoEnrichment	sp|P22274|ARF_CANAL
37353	g4324	0.130041	-0.10789	NoEnrichment	sp|P22274|ARF_CANAL
37399	g4334	-0.552456	0.24454	NoEnrichment	sp|Q95029|CATL_DROME
37401	g4334	0.254564	0.24454	NoEnrichment	sp|Q95029|CATL_DROME
37416	g4335	-0.399505	0.2762	NoEnrichment	sp|Q95029|CATL_DROME
37417	g4335	-0.634437	0.2762	NoEnrichment	sp|Q95029|CATL_DROME
3748	g12125	0.551281	-0.00351	NoEnrichment	sp|Q95NI4|CALM_HALOK
37492	g24173	0.348128	0	NoEnrichment	NA
37494	g24173	-0.409633	0	NoEnrichment	NA
37547	g24190	0.438533	-0.0193	NoEnrichment	sp|Q921C5|BICD2_MOUSE
37549	g24190	-0.652431	-0.0193	NoEnrichment	sp|Q921C5|BICD2_MOUSE
37553	g24191	1.14622	0.87591	Head	sp|Q28107|FA5_BOVIN
37564	g24192	-0.523437	0	NoEnrichment	NA
37630	g24220	0.905411	0.00155	NoEnrichment	sp|Q96RW7|HMCN1_HUMAN
37689	g29077	0.534004	0	NoEnrichment	NA
37750	g29094	-0.207852	0	NoEnrichment	NA
3779	g18801	-0.277917	0	NoEnrichment	sp|Q80XJ3|TTC28_MOUSE
37834	g29591	0.477412	0	NoEnrichment	NA
37839	g29601	0.636466	0	NoEnrichment	sp|Q6DJN2|TRF6B_XENLA
37840	g29601	0.655792	0	NoEnrichment	sp|Q6DJN2|TRF6B_XENLA
37841	g29601	0.83622	0	NoEnrichment	sp|Q6DJN2|TRF6B_XENLA
37849	g29604	-0.807741	0	NoEnrichment	sp|Q9BUZ4|TRAF4_HUMAN
3785	g18802	-0.329417	0	NoEnrichment	NA
37897	g29617	1.35085	0	NoEnrichment	NA
37929	g29628	-0.166314	-0.01916	NoEnrichment	sp|A8WG21|SNXAB_DANRE
37930	g29628	1.00781	-0.01916	NoEnrichment	sp|A8WG21|SNXAB_DANRE
37956	g22334	0.944814	0	NoEnrichment	NA
37993	g2900	-0.524189	0	NoEnrichment	sp|Q7S4N5|MCA1B_NEUCR
3804	g18805	-0.181317	0	NoEnrichment	sp|P35448|TSP1_XENLA
38045	g2913	-0.223106	0	NoEnrichment	NA
38049	g2913	0.112569	0	NoEnrichment	NA
38055	g2915	-0.135065	0	NoEnrichment	NA
3808	g18806	-0.875466	0.03724	NoEnrichment	sp|P0CB22|ATX2_ARATH
38123	g2942	0.467456	0	NoEnrichment	NA
3814	g18806	-0.89078	0.03724	NoEnrichment	sp|P0CB22|ATX2_ARATH
3817	g18807	-0.28946	-0.12704	NoEnrichment	sp|P49166|RL37A_YEAST
38211	g2963	-0.346792	0	NoEnrichment	NA
38303	g10687	-0.124408	0.14627	NoEnrichment	sp|Q3SZB4|ACADM_BOVIN
38385	g2291	0.0900885	-0.0178	NoEnrichment	sp|Q9CZR2|NALD2_MOUSE
3840	g18812	0.777665	0.01227	NoEnrichment	sp|Q66JF3|MKNK1_XENTR
38403	g2295	0.386957	0	NoEnrichment	NA
3842	g18812	0.1831	0.01227	NoEnrichment	sp|Q66JF3|MKNK1_XENTR
3845	g18812	0.3106	0.01227	NoEnrichment	sp|Q66JF3|MKNK1_XENTR
38527	g8869	0.137638	0	NoEnrichment	NA
38558	g15962	0.218201	0.00882	NoEnrichment	sp|Q9UKJ5|CHIC2_HUMAN
38604	g15984	-0.261059	-0.02292	NoEnrichment	sp|P83941|ELOC_RAT
38605	g15984	0.335111	-0.02292	NoEnrichment	sp|P83941|ELOC_RAT
38619	g15989	-0.0345586	0	NoEnrichment	NA
38626	g15990	-0.670351	-0.02987	NoEnrichment	sp|Q91WM3|U3IP2_MOUSE
38643	g15994	0.319139	0	NoEnrichment	NA
38717	g16024	0.827377	-0.01096	NoEnrichment	sp|Q5SVZ6|ZMYM1_HUMAN
38719	g16024	0.342756	-0.01096	NoEnrichment	sp|Q5SVZ6|ZMYM1_HUMAN
38720	g16024	-0.059379	-0.01096	NoEnrichment	sp|Q5SVZ6|ZMYM1_HUMAN
38723	g16024	1.95041	-0.01096	NoEnrichment	sp|Q5SVZ6|ZMYM1_HUMAN
38724	g16024	1.21629	-0.01096	NoEnrichment	sp|Q5SVZ6|ZMYM1_HUMAN
38747	g16033	0.71535	-0.00318	NoEnrichment	sp|Q09930|DIRA_CAEEL
38761	g16037	-0.715629	0	NoEnrichment	NA
38774	g16040	0.155183	0.16426	NoEnrichment	sp|P14099|PDE2A_BOVIN
3880	g18824	0.319872	0.03968	NoEnrichment	sp|Q18246|RAP1_CAEEL
38848	g16071	0.33951	0.06896	NoEnrichment	sp|Q9LVK9|ALA7_ARATH
38852	g16072	-0.0326883	0.03816	NoEnrichment	sp|Q58DT4|P5CR1_BOVIN
38853	g16072	0.485937	0.03816	NoEnrichment	sp|Q58DT4|P5CR1_BOVIN
38857	g16073	0.460604	0	NoEnrichment	NA
3888	g18825	0.266957	0	NoEnrichment	sp|A8XNX8|LGC4_CAEBR
38904	g15810	-0.468272	0.00633	NoEnrichment	sp|Q9QYS2|GRM3_MOUSE
38945	g2404	-0.180672	0	NoEnrichment	NA
39021	g2437	0.559032	0	NoEnrichment	NA
39093	g2463	-0.23643	0.00561	NoEnrichment	sp|P50025|DNAJ_LEGPN
39101	g2467	0.589703	0	NoEnrichment	NA
39127	g2473	-0.197187	0	NoEnrichment	sp|Q9HCI6|K1586_HUMAN
39146	g2479	0.468329	0.00295	NoEnrichment	sp|Q5PQ44|CD022_XENLA
39152	g2480	-0.149063	-0.01102	NoEnrichment	sp|Q4QRK0|MAP11_DANRE
39188	g2488	0.469369	0	NoEnrichment	NA
39227	g31026	0.520436	-0.14599	NoEnrichment	sp|O35426|XBP1_MOUSE
39260	g31028	0.682239	-0.0516	NoEnrichment	sp|Q8CIE2|ZMIZ2_MOUSE
39288	g22288	0.620133	0	NoEnrichment	NA
39295	g22293	-0.205571	0	NoEnrichment	NA
39311	g22300	0.00109895	0.12619	NoEnrichment	sp|Q7SZ59|RASLC_DANRE
39345	g22314	-0.0347766	0.07734	NoEnrichment	sp|Q9H841|NPAL2_HUMAN
39362	g22317	0.93942	-0.38408	NoEnrichment	sp|Q0VCJ7|RERG_BOVIN
39385	g22325	-0.345378	-0.1046	NoEnrichment	sp|P27075|RL44_CANTR
39431	g15344	0.342338	0	NoEnrichment	NA
3945	g18842	0.547112	0.10999	NoEnrichment	sp|Q6DID7|WLS_MOUSE
39457	g15359	-0.368394	0.37926	NoEnrichment	sp|O60481|ZIC3_HUMAN
39458	g15359	0.434548	0.37926	NoEnrichment	sp|O60481|ZIC3_HUMAN
3946	g18842	0.568742	0.10999	NoEnrichment	sp|Q6DID7|WLS_MOUSE
39460	g15359	0.298462	0.37926	NoEnrichment	sp|O60481|ZIC3_HUMAN
39522	g5506	0.295246	0	NoEnrichment	NA
39535	g5516	0.438794	0.00046	NoEnrichment	sp|P33527|MRP1_HUMAN
39540	g5519	0.0315742	0.17987	NoEnrichment	sp|Q5F364|MRP1_CHICK
39565	g5525	1.87208	0.0493	NoEnrichment	sp|P11308|ERG_HUMAN
39604	g5534	-0.0375621	0.05566	NoEnrichment	sp|P39896|TCMO_STRGA
39630	g5542	-0.157371	-0.07913	NoEnrichment	sp|P0CH27|RL402_TRYCR
39637	g5548	-0.229033	0.088	NoEnrichment	sp|P47820|ACE_RAT
39744	g21684	-0.581791	0.02065	NoEnrichment	sp|Q8VE62|PAIP1_MOUSE
3982	g19618	0.458993	0.04193	NoEnrichment	sp|P11442|CLH1_RAT
39903	g27820	0.223002	-0.06644	NoEnrichment	sp|Q9VDS6|SURF6_DROME
39942	g27825	-0.275814	-0.13234	NoEnrichment	sp|Q27415|NLP_DROME
39965	g27837	1.11553	0	NoEnrichment	NA
40061	g29493	0.628169	0.00173	NoEnrichment	sp|B5XCB8|THAP1_SALSA
40066	g29493	-0.373544	0.00173	NoEnrichment	sp|B5XCB8|THAP1_SALSA
40069	g29493	0.145555	0.00173	NoEnrichment	sp|B5XCB8|THAP1_SALSA
40082	g29496	-0.559609	0.0055	NoEnrichment	sp|Q5W4S4|FNIP1_CHICK
40094	g29498	0.523132	0	NoEnrichment	NA
40113	g13793	-0.309964	0	NoEnrichment	NA
40179	g33631	0.0167876	-0.00065	NoEnrichment	sp|Q90839|DKK3_CHICK
40243	g33661	-0.344019	-0.73013	NoEnrichment	sp|Q5R733|CPEB1_PONAB
40267	g33666	1.01123	-1.03565	NoEnrichment	sp|Q8IZF6|AGRG4_HUMAN
4027	g10197	-0.812144	0	NoEnrichment	sp|Q58T08|ISM2_DANRE
40271	g33667	-0.0699746	0	NoEnrichment	NA
40284	g33668	0.362386	0.00826	NoEnrichment	sp|Q9P2R6|RERE_HUMAN
40286	g33668	0.313786	0.00826	NoEnrichment	sp|Q9P2R6|RERE_HUMAN
40289	g33668	-0.648516	0.00826	NoEnrichment	sp|Q9P2R6|RERE_HUMAN
40295	g33670	0.0127224	0	NoEnrichment	NA
40297	g33670	0.0695735	0	NoEnrichment	NA
40299	g33670	-0.0308154	0	NoEnrichment	NA
40300	g33670	-0.235534	0	NoEnrichment	NA
40359	g26462	-0.200543	0.01489	NoEnrichment	sp|Q4R532|SYNG1_MACFA
40376	g17202	0.207187	0.30205	NoEnrichment	sp|P70191|TRAF5_MOUSE
40472	g17233	0.331589	0	NoEnrichment	sp|Q04202|TCB2_CAEBR
40492	g17240	-0.656308	0.00706	NoEnrichment	sp|Q9P0X4|CAC1I_HUMAN
40502	g17241	-0.274638	0	NoEnrichment	NA
4051	g20598	0.784069	-0.00455	NoEnrichment	sp|Q9DBN1|STR6L_MOUSE
40566	g17270	0.121218	0.01095	NoEnrichment	sp|P00630|PA2_APIME
40572	g17271	-0.25006	-0.0757	NoEnrichment	sp|O00418|EF2K_HUMAN
4062	g20600	0.209513	-0.0032	NoEnrichment	sp|Q80TI0|GRM1B_MOUSE
40668	g17298	-0.342505	-0.64191	NoEnrichment	sp|P12849|KAP1_MOUSE
40688	g17309	-0.119925	-0.01459	NoEnrichment	sp|Q8IWB9|TEX2_HUMAN
40705	g17315	-0.150238	0.147	NoEnrichment	sp|Q8RPX2|AGUA_LACSS
40760	NA	-0.637485	0	NoEnrichment	NA
40761	NA	-0.283586	0	NoEnrichment	NA
40764	NA	-0.608512	0	NoEnrichment	NA
40795	g7186	-0.166771	0	NoEnrichment	sp|Q5F478|ANR44_CHICK
40823	g10483	0.702838	0.1449	NoEnrichment	sp|Q5XXP2|OPN4_PHOSU
40876	g16764	0.675395	0	NoEnrichment	NA
40890	g16768	-0.124083	0	NoEnrichment	NA
40913	g16770	-0.162656	-0.18976	NoEnrichment	sp|O01727|RS6_BRAFL
40921	g16772	-0.154053	-0.00597	NoEnrichment	sp|P08155|KRH1_DROME
4094	g20603	-0.279497	0.23862	NoEnrichment	sp|Q99J45|NRBP_MOUSE
40974	g16790	-0.341172	-0.1776	NoEnrichment	sp|Q7ZUB2|RS17_COTJA
41015	g16800	-0.262504	0	NoEnrichment	sp|Q96DM1|PGBD4_HUMAN
41016	g16800	0.345558	0	NoEnrichment	sp|Q96DM1|PGBD4_HUMAN
41036	g17783	-0.00435665	0.06088	NoEnrichment	sp|Q8K4H1|KFA_MOUSE
41045	g17786	0.577851	0	NoEnrichment	NA
41050	g17787	2.09286	-0.02423	NoEnrichment	sp|P57729|RAB38_HUMAN
4107	g20603	0.845376	0.23862	NoEnrichment	sp|Q99J45|NRBP_MOUSE
41080	g17795	-0.176816	0.00369	NoEnrichment	sp|Q61847|MEP1B_MOUSE
4111	g20604	0.8192	0.00105	NoEnrichment	sp|Q26486|FKBP4_SPOFR
4116	g20604	0.0382483	0.00105	NoEnrichment	sp|Q26486|FKBP4_SPOFR
4120	g20604	0.14424	0.00105	NoEnrichment	sp|Q26486|FKBP4_SPOFR
4127	g20605	-0.212977	-0.16829	NoEnrichment	sp|P37380|RL17_PODCA
41276	g30964	0.0554315	0	NoEnrichment	NA
41344	g30982	0.121415	-0.00606	NoEnrichment	sp|A0JP85|CNOT1_XENTR
4137	g20610	0.19073	0	NoEnrichment	NA
41419	g27386	0.985891	0	NoEnrichment	NA
41420	g27386	0.487865	0	NoEnrichment	NA
41443	g27399	0.0857392	0	NoEnrichment	NA
41456	g27404	-0.0990728	-0.0076	NoEnrichment	sp|Q9UHJ3|SMBT1_HUMAN
41470	g27409	0.17036	-0.14389	NoEnrichment	sp|Q6GNY1|MIB1_XENLA
41472	g27409	-0.046421	-0.14389	NoEnrichment	sp|Q6GNY1|MIB1_XENLA
4150	g20613	1.07242	0	NoEnrichment	NA
41505	g27416	0.205831	0	NoEnrichment	NA
41598	g27447	1.36069	0	NoEnrichment	NA
41608	g27448	-0.253368	-0.0061	NoEnrichment	sp|Q8K4Q7|CERK1_MOUSE
41628	g27454	0.189484	0	NoEnrichment	NA
41633	g27456	-0.272626	-0.13066	NoEnrichment	sp|Q18246|RAP1_CAEEL
41651	g27473	0.232017	0	NoEnrichment	NA
41655	g27478	0.163595	0	NoEnrichment	NA
41661	g27484	0.331951	0.00032	NoEnrichment	sp|J7FCF0|DMR3T_HORSE
41670	g27490	0.339074	0	NoEnrichment	NA
4168	g20632	1.26508	0	NoEnrichment	NA
41711	g27497	-0.330723	0	NoEnrichment	NA
4172	g20636	0.19944	0.12375	NoEnrichment	sp|P42026|NDUS7_BOVIN
41740	NA	-0.164112	0	NoEnrichment	NA
41754	g33309	1.06816	0	NoEnrichment	NA
41771	g33315	0.152682	-0.78274	NoEnrichment	sp|Q6S9Z5|ZN474_HUMAN
4179	g20637	0.999732	-0.0852	NoEnrichment	sp|A2VDZ3|MEF2A_BOVIN
41797	NA	0.243537	0	NoEnrichment	NA
41804	g14683	-0.0312223	0	NoEnrichment	NA
4185	g20637	0.4425	-0.0852	NoEnrichment	sp|A2VDZ3|MEF2A_BOVIN
4186	g20637	0.0435442	-0.0852	NoEnrichment	sp|A2VDZ3|MEF2A_BOVIN
41883	g31745	-0.120124	0	NoEnrichment	NA
4192	g20640	-0.510408	0.09947	NoEnrichment	sp|Q25197|HTK7_HYDVU
41922	g25741	-0.576673	0	NoEnrichment	NA
41967	g25762	-0.120956	0.08169	NoEnrichment	sp|Q10651|A4_CAEEL
41969	g25762	-0.127914	0.08169	NoEnrichment	sp|Q10651|A4_CAEEL
41971	g25762	1.18379	0.08169	NoEnrichment	sp|Q10651|A4_CAEEL
41979	g25766	-0.209304	0	NoEnrichment	NA
42027	g21401	0.141843	0	NoEnrichment	NA
42293	g12179	0.104901	0	NoEnrichment	NA
4233	g20654	-0.532554	0.12454	NoEnrichment	sp|B3EWZ8|ECT_ACRMI
42425	g12223	0.674557	0.32912	NoEnrichment	sp|D3ZDI6|MYLIP_RAT
42453	g12232	1.54748	0.1408	NoEnrichment	sp|P33402|GCYA2_HUMAN
42457	g12232	0.2981	0.1408	NoEnrichment	sp|P33402|GCYA2_HUMAN
42469	g12236	0.926442	0	NoEnrichment	NA
42470	g12236	0.97022	0	NoEnrichment	NA
42528	g19644	1.60641	0	NoEnrichment	NA
42540	g19650	0.644756	0	NoEnrichment	sp|Q9FT69|RQSIM_ARATH
42610	g19680	0.440023	-0.00399	NoEnrichment	sp|Q503Y4|OVCA2_DANRE
42671	NA	0.155174	0	NoEnrichment	NA
42680	g20323	-0.280553	0	NoEnrichment	NA
42681	g20323	-0.15043	0	NoEnrichment	NA
42721	g11338	-0.215176	0	NoEnrichment	NA
42729	g11339	-0.103137	0	NoEnrichment	NA
42731	g11341	-0.264908	0	NoEnrichment	NA
42770	g11351	0.14271	0.0208	NoEnrichment	sp|Q7SIB2|CO4A1_BOVIN
42771	g11351	-0.141258	0.0208	NoEnrichment	sp|Q7SIB2|CO4A1_BOVIN
42772	g11352	-0.141367	0.20281	NoEnrichment	sp|P08120|CO4A1_DROME
42784	g11355	0.0466342	0.26216	NoEnrichment	sp|P27393|CO4A2_ASCSU
4279	g20662	0.398032	-0.05209	NoEnrichment	sp|Q6UUV9|CRTC1_HUMAN
42793	g11359	-0.811555	0	NoEnrichment	NA
42796	g11361	0.572793	-0.00525	NoEnrichment	sp|Q7TNH6|NPHP3_MOUSE
42802	g11363	-0.136256	0.0549	NoEnrichment	sp|P35520|CBS_HUMAN
42804	g11363	-0.0854142	0.0549	NoEnrichment	sp|P35520|CBS_HUMAN
42808	g11363	0.00060026	0.0549	NoEnrichment	sp|P35520|CBS_HUMAN
42831	g11373	-0.303939	-0.0049	NoEnrichment	sp|Q54CS8|PEX6_DICDI
4285	g20662	0.223827	-0.05209	NoEnrichment	sp|Q6UUV9|CRTC1_HUMAN
42869	g11395	-0.889055	-0.18564	NoEnrichment	sp|Q9R087|GPC6_MOUSE
42873	g11395	0.722512	-0.18564	NoEnrichment	sp|Q9R087|GPC6_MOUSE
42874	g11395	0.142684	-0.18564	NoEnrichment	sp|Q9R087|GPC6_MOUSE
42875	g11395	0.611163	-0.18564	NoEnrichment	sp|Q9R087|GPC6_MOUSE
42904	g11402	1.116	0	NoEnrichment	NA
42919	g11403	0.27703	0	NoEnrichment	NA
4296	g20665	-0.599108	0	NoEnrichment	NA
42990	g8034	0.73508	0	NoEnrichment	NA
42991	g8035	0.0391258	0	NoEnrichment	NA
43063	g32011	-0.432498	0	NoEnrichment	NA
43081	g13034	-0.0274824	0	NoEnrichment	sp|P16423|POLR_DROME
43108	g13041	1.16418	0.25365	Head	sp|Q0IH24|SPEF1_XENLA
43168	g10457	0.850906	0.00653	NoEnrichment	sp|Q90ZH9|S17AB_XENLA
4321	g20673	-0.261006	0	NoEnrichment	sp|A2PYH4|HFM1_HUMAN
43223	g13586	0.998408	0	NoEnrichment	NA
43228	g13587	0.758773	-0.00172	NoEnrichment	sp|Q64121|PRLHR_RAT
43229	g13587	1.62096	-0.00172	NoEnrichment	sp|Q64121|PRLHR_RAT
43231	g13587	0.331392	-0.00172	NoEnrichment	sp|Q64121|PRLHR_RAT
43247	g13590	0.677912	-0.06093	NoEnrichment	sp|Q54K09|GRLQ_DICDI
43286	g13598	-0.579647	0	NoEnrichment	NA
43290	g13598	-0.10325	0	NoEnrichment	NA
43302	g13600	0.304412	-0.05975	NoEnrichment	sp|A1L3F4|MEX3B_XENLA
43303	g13600	0.9933	-0.05975	NoEnrichment	sp|A1L3F4|MEX3B_XENLA
43305	g13600	1.0302	-0.05975	NoEnrichment	sp|A1L3F4|MEX3B_XENLA
43312	g13601	0.164634	0.00853	NoEnrichment	sp|Q8NDA2|HMCN2_HUMAN
4333	g20678	-0.511119	0	NoEnrichment	NA
43360	g13612	0.732077	0	NoEnrichment	NA
4337	g20679	-0.198273	0	NoEnrichment	NA
43383	g1515	-0.314242	0	NoEnrichment	sp|P28334|5HT1B_MOUSE
43384	g1515	-0.452618	0	NoEnrichment	sp|P28334|5HT1B_MOUSE
43404	g1519	-0.392687	0.05636	NoEnrichment	sp|O61577|KTNA1_STRPU
43418	g1520	1.13987	0.08173	Head	sp|O95477|ABCA1_HUMAN
43419	g1520	1.32713	0.08173	Head	sp|O95477|ABCA1_HUMAN
43428	g1532	0.351842	0.03718	NoEnrichment	sp|Q9BZC7|ABCA2_HUMAN
43430	g1533	0.203951	0.0028	NoEnrichment	sp|Q8IZY2|ABCA7_HUMAN
43494	g8204	0.148224	0	NoEnrichment	NA
43546	g1973	0.264481	0.33071	NoEnrichment	sp|Q52KG5|KI26A_MOUSE
43547	g1973	0.14229	0.33071	NoEnrichment	sp|Q52KG5|KI26A_MOUSE
43678	g2009	-0.128821	0.00384	NoEnrichment	sp|P15454|KGUA_YEAST
43690	g2010	-0.23299	0.05445	NoEnrichment	sp|O94827|PKHG5_HUMAN
43709	g2012	1.35814	0	NoEnrichment	NA
43772	g25200	-0.306949	0	NoEnrichment	NA
43801	g27801	0.486274	-0.01878	NoEnrichment	sp|Q5UQ60|YL662_MIMIV
43811	g27803	0.589109	0	NoEnrichment	NA
43844	g27806	0.907809	0	NoEnrichment	NA
43845	g27806	-0.193736	0	NoEnrichment	NA
43851	g27808	0.278135	0	NoEnrichment	NA
43866	g27812	-0.329644	0	NoEnrichment	NA
4389	g23694	-0.482529	0.02452	NoEnrichment	sp|Q6P5H6|FRMD5_MOUSE
43891	g27814	0.263567	0.0027	NoEnrichment	sp|Q6AZT7|NPHP3_XENLA
44	g5789	0.438445	0.00609	NoEnrichment	sp|Q7SY06|HACD3_DANRE
44026	g30442	0.912761	0	NoEnrichment	NA
44029	g30442	1.9711	0	NoEnrichment	NA
44041	g30446	-0.171878	-0.05018	NoEnrichment	sp|P10079|FBP1_STRPU
44126	g30466	-0.158177	0	NoEnrichment	NA
44128	g30467	0.716965	0.01359	NoEnrichment	sp|P70031|CCKAR_XENLA
44129	g30467	-0.658376	0.01359	NoEnrichment	sp|P70031|CCKAR_XENLA
44153	g21368	-0.414555	0	NoEnrichment	NA
44164	g21372	0.72677	-0.00717	NoEnrichment	sp|Q14562|DHX8_HUMAN
442	g17117	-0.512278	0	NoEnrichment	NA
44240	g10910	-0.400304	0	NoEnrichment	NA
44290	g11444	0.101004	0.16541	NoEnrichment	sp|Q9H7M6|ZSWM4_HUMAN
44291	g11445	0.920019	0	NoEnrichment	sp|B4F777|HMGN5_RAT
44334	g11456	-0.027202	0	NoEnrichment	NA
44453	g29631	-0.504212	0	NoEnrichment	sp|P21328|RTJK_DROME
44476	g29638	0.390918	0.39544	NoEnrichment	sp|P10039|TENA_CHICK
44493	g29640	0.28312	-0.00488	NoEnrichment	sp|Q8BFY9|TNPO1_MOUSE
44545	g24306	-0.366325	0.00159	NoEnrichment	sp|Q68EF4|GRM4_MOUSE
44566	g24313	-0.0900765	0.03231	NoEnrichment	sp|Q9QYS2|GRM3_MOUSE
44666	g24725	0.542204	0	NoEnrichment	NA
44708	g9039	-0.473013	0	NoEnrichment	NA
44721	g9045	0.497707	0.00367	NoEnrichment	sp|Q91998|BRN3_CHICK
44735	g9051	-0.50061	0	NoEnrichment	sp|Q95SX7|RTBS_DROME
4474	g31033	0.4138	0.06095	NoEnrichment	sp|Q9VBW3|CAD96_DROME
4476	g31034	-0.0672982	0	NoEnrichment	NA
44769	g9060	-0.0522047	-0.00579	NoEnrichment	sp|A7SA47|EIF3H_NEMVE
44780	g9063	0.865409	-0.08115	NoEnrichment	sp|Q9UPI3|FLVC2_HUMAN
44785	g9064	-0.557179	0	NoEnrichment	NA
44815	g28212	-0.331008	-0.02785	NoEnrichment	sp|O17185|SUP9_CAEEL
44844	g28218	0.156432	0	NoEnrichment	sp|Q5GH73|XKR6_HUMAN
4487	g31042	-0.523024	0	NoEnrichment	sp|P21328|RTJK_DROME
44873	g28229	-0.161691	0.25862	NoEnrichment	sp|Q3SZJ4|PTGR1_BOVIN
44910	g28244	0.960839	0	NoEnrichment	NA
44911	g28244	0.814973	0	NoEnrichment	NA
44971	g28268	-0.150386	0	NoEnrichment	NA
45014	g28284	0.0907636	-0.14807	NoEnrichment	sp|A1L2I9|T214B_XENLA
4502	g31047	0.455502	-0.00047	NoEnrichment	sp|Q9FN03|UVR8_ARATH
45036	g19129	-0.168982	0	NoEnrichment	sp|Q3EAQ5|PTR36_ARATH
4514	g31056	1.72963	0	NoEnrichment	NA
4515	g31057	1.77009	0.0025	NoEnrichment	sp|O54888|RPA2_RAT
45158	g21825	-0.424842	0	NoEnrichment	NA
4517	g31057	1.39893	0.0025	NoEnrichment	sp|O54888|RPA2_RAT
45177	g21831	-0.256342	-0.11025	NoEnrichment	sp|Q6QMZ4|RL6_CHILA
45284	g26249	0.0667092	0	NoEnrichment	NA
45297	g26255	0.600845	0	NoEnrichment	NA
45336	g29989	0.799162	0	NoEnrichment	NA
4538	g31064	-0.103727	-0.05737	NoEnrichment	sp|Q6ZNG9|KRBA2_HUMAN
45383	g30012	0.528738	0	NoEnrichment	NA
45433	g30036	0.280809	0.06758	NoEnrichment	sp|Q6NSQ7|LTV1_MOUSE
45440	g30037	0.892678	-0.00488	NoEnrichment	sp|Q9SKX0|AB13C_ARATH
45525	g30066	0.0387209	-0.18792	NoEnrichment	sp|Q11126|FUT3_BOVIN
45547	g30081	-0.255373	0.00507	NoEnrichment	sp|Q32MH5|F214A_HUMAN
45587	g30094	-0.369382	0	NoEnrichment	NA
45592	g30095	-0.304976	-0.25283	NoEnrichment	sp|Q6Z1C0|NUCL1_ORYSJ
45758	g3107	0.357201	0	NoEnrichment	NA
45769	g3108	-0.0764921	-0.00599	NoEnrichment	sp|Q0V9R4|CCD39_XENTR
4582	g4685	-0.161789	0.00103	NoEnrichment	sp|O95490|AGRL2_HUMAN
45824	g3126	0.554933	-0.0255	NoEnrichment	sp|G5E8K5|ANK3_MOUSE
45827	g3127	-0.195658	0.01309	NoEnrichment	sp|Q9VCZ3|OCTB1_DROME
45843	g3130	-0.0602758	0.03041	NoEnrichment	sp|P58021|TM9S2_MOUSE
45906	g13058	0.232355	0.56313	NoEnrichment	sp|H6BDU4|SODC_CAMDR
45936	g13067	-0.488345	0	NoEnrichment	NA
45951	g13083	0.677194	-0.1517	NoEnrichment	sp|P17491|INHBB_RAT
45972	g13087	0.785497	0	NoEnrichment	NA
45973	g13087	-0.10469	0	NoEnrichment	NA
45975	g13087	-0.0544554	0	NoEnrichment	NA
45977	g13087	0.38572	0	NoEnrichment	NA
46056	g13107	-0.468825	0	NoEnrichment	NA
46060	g13108	-0.211069	0.03128	NoEnrichment	sp|Q8CHN6|SGPL1_RAT
46066	g13109	-0.156335	0	NoEnrichment	NA
46086	g13121	-1.5905	0	NoEnrichment	sp|Q9Y2U5|M3K2_HUMAN
46247	g24406	0.594637	-0.1137	NoEnrichment	sp|P11362|FGFR1_HUMAN
46250	g24406	-0.294391	-0.1137	NoEnrichment	sp|P11362|FGFR1_HUMAN
46256	g24406	-0.900731	-0.1137	NoEnrichment	sp|P11362|FGFR1_HUMAN
46289	g10885	-0.204282	0	NoEnrichment	NA
46349	g5099	0.207697	-0.02607	NoEnrichment	sp|E9Q7T7|CHADL_MOUSE
464	g5003	0.304938	0.00839	NoEnrichment	sp|Q9H4G4|GAPR1_HUMAN
46427	g24294	0.580192	-0.07452	NoEnrichment	sp|Q9JHJ7|TEST_MOUSE
46428	g24294	0.146147	-0.07452	NoEnrichment	sp|Q9JHJ7|TEST_MOUSE
4643	g786	-0.0387101	0	NoEnrichment	NA
46479	g32332	0.123573	-0.00439	NoEnrichment	sp|A1L1V4|LOL2B_DANRE
4651	g15198	0.172275	0	NoEnrichment	NA
46510	g32336	0.620253	0.00703	NoEnrichment	sp|Q9H5L6|THAP9_HUMAN
46521	g32341	-0.216563	0.1097	NoEnrichment	sp|Q8N8S7|ENAH_HUMAN
46523	g32341	0.741832	0.1097	NoEnrichment	sp|Q8N8S7|ENAH_HUMAN
4660	g15202	-0.208089	0.0745	NoEnrichment	sp|P50123|AMPE_RAT
46602	g32359	1.16243	0	NoEnrichment	NA
46606	g32361	-0.0527337	0.18207	NoEnrichment	sp|O08608|OAZ2_MOUSE
46607	g32361	0.317813	0.18207	NoEnrichment	sp|O08608|OAZ2_MOUSE
46609	g32361	-0.519162	0.18207	NoEnrichment	sp|O08608|OAZ2_MOUSE
46615	g32362	0.0144612	0.07347	NoEnrichment	sp|Q3U1V8|M3K9_MOUSE
46632	g32363	0.426222	-0.02474	NoEnrichment	sp|O15040|TCPR2_HUMAN
46699	g32389	-0.580185	0	NoEnrichment	NA
46701	g32389	0.531063	0	NoEnrichment	NA
46721	g32399	-0.0485765	-0.00827	NoEnrichment	sp|Q6NUC1|CNFNA_XENLA
46755	g13139	0.678762	0	NoEnrichment	NA
4681	g15212	0.397098	0	NoEnrichment	NA
4682	g15212	-0.0788627	0	NoEnrichment	NA
46822	g13156	-0.436139	0.04162	NoEnrichment	sp|Q24533|DICH_DROME
4683	g15212	0.308643	0	NoEnrichment	NA
46907	g30157	-0.194707	-0.02166	NoEnrichment	sp|Q4SSF5|LTOR3_TETNG
46917	g30158	-0.0648158	-0.01108	NoEnrichment	sp|A0R5N0|EGTB_MYCS2
46918	g30158	0.00349254	-0.01108	NoEnrichment	sp|A0R5N0|EGTB_MYCS2
46923	g30158	-0.743875	-0.01108	NoEnrichment	sp|A0R5N0|EGTB_MYCS2
46928	g30159	-0.221278	0	NoEnrichment	NA
46935	g30160	-0.265909	0	NoEnrichment	NA
46936	g30160	0.409183	0	NoEnrichment	NA
46937	g30160	-0.303773	0	NoEnrichment	NA
46949	g30160	-1.32816	0	NoEnrichment	NA
46950	g30160	-1.1509	0	NoEnrichment	NA
46961	g30160	0.449033	0	NoEnrichment	NA
46969	g30161	0.430986	0	NoEnrichment	NA
46970	g30161	0.0516636	0	NoEnrichment	NA
46976	g30161	0.319368	0	NoEnrichment	NA
46985	NA	-0.353616	0	NoEnrichment	NA
4706	g15223	-0.309805	0.27146	NoEnrichment	sp|Q8BH31|MFSD8_MOUSE
47063	g30994	-0.186176	0	NoEnrichment	NA
47070	g30995	-0.534734	-0.20995	NoEnrichment	sp|Q64605|PTPRS_RAT
47126	g31010	-0.152755	-0.00509	NoEnrichment	sp|P32717|YJCS_ECOLI
4716	g15226	1.89224	0.00138	NoEnrichment	sp|A6YP92|ARX_RAT
47167	g2616	-0.316134	0.24331	NoEnrichment	sp|Q4UMH6|Y381_RICFE
4717	g15226	0.756117	0.00138	NoEnrichment	sp|A6YP92|ARX_RAT
47185	g2621	-0.0084324	0.57279	NoEnrichment	sp|Q8BYM7|RSH4A_MOUSE
47187	g2621	0.281855	0.57279	NoEnrichment	sp|Q8BYM7|RSH4A_MOUSE
47189	g2621	0.245962	0.57279	NoEnrichment	sp|Q8BYM7|RSH4A_MOUSE
4719	g15226	1.13101	0.00138	NoEnrichment	sp|A6YP92|ARX_RAT
47190	g2621	0.708734	0.57279	NoEnrichment	sp|Q8BYM7|RSH4A_MOUSE
47253	g2642	-0.192271	-0.00142	NoEnrichment	sp|Q7Z494|NPHP3_HUMAN
47310	g17966	0.0171664	0	NoEnrichment	NA
47413	g13955	0.118782	0	NoEnrichment	NA
47418	g13958	0.664556	0	NoEnrichment	NA
47419	g13958	0.812289	0	NoEnrichment	NA
47421	g13958	0.422805	0	NoEnrichment	NA
47423	g13958	0.562918	0	NoEnrichment	NA
47436	g13958	-0.0372824	0	NoEnrichment	NA
47442	g13958	0.183932	0	NoEnrichment	NA
47472	g13962	1.08171	0.09355	NoEnrichment	sp|Q9JJA9|GRASP_MOUSE
47473	g13962	0.145844	0.09355	NoEnrichment	sp|Q9JJA9|GRASP_MOUSE
47476	g13964	0.530941	0	NoEnrichment	NA
47484	g13968	-0.14343	0	NoEnrichment	sp|Q5SVZ6|ZMYM1_HUMAN
47513	g13980	-0.421775	-0.00638	NoEnrichment	sp|Q9TWL9|COMA_CONMA
47565	g13997	0.742281	0	NoEnrichment	NA
47625	g9438	0.0774752	0	NoEnrichment	NA
4765	g15241	0.429421	-0.19345	NoEnrichment	sp|O43603|GALR2_HUMAN
4767	g15241	1.06762	-0.19345	NoEnrichment	sp|O43603|GALR2_HUMAN
4768	g15241	0.664339	-0.19345	NoEnrichment	sp|O43603|GALR2_HUMAN
47703	g13686	0.153486	0.0012	NoEnrichment	sp|P46824|KLC_DROME
4771	g15242	0.609113	-0.08912	NoEnrichment	sp|O08726|GALR2_RAT
47711	g13689	-0.128089	0.00544	NoEnrichment	sp|Q8N9W6|BOLL_HUMAN
4774	g15242	0.311787	-0.08912	NoEnrichment	sp|O08726|GALR2_RAT
47747	g13698	0.0170447	-0.11312	NoEnrichment	sp|Q804X9|OPN4A_GADMO
4776	g15243	0.342691	0	NoEnrichment	NA
4777	g15243	1.47499	0	NoEnrichment	NA
4778	g15243	0.754024	0	NoEnrichment	NA
4779	g15244	0.244911	-0.00561	NoEnrichment	sp|Q9H4K1|RIBC2_HUMAN
47835	g13729	0.0452501	0.01055	NoEnrichment	sp|P45953|ACADV_RAT
47844	g13731	0.641899	0	NoEnrichment	sp|Q95SX7|RTBS_DROME
47847	g13730	1.84511	0.06426	NoEnrichment	sp|P42325|NCAH_DROME
47918	g12710	0.7974	0.12297	NoEnrichment	sp|P35283|RAB12_MOUSE
47919	g12710	1.24306	0.12297	NoEnrichment	sp|P35283|RAB12_MOUSE
47920	g12710	0.568727	0.12297	NoEnrichment	sp|P35283|RAB12_MOUSE
47921	g12710	0.739091	0.12297	NoEnrichment	sp|P35283|RAB12_MOUSE
47922	g12710	0.989193	0.12297	NoEnrichment	sp|P35283|RAB12_MOUSE
47924	g12710	0.987339	0.12297	NoEnrichment	sp|P35283|RAB12_MOUSE
47926	g12711	0.0358355	0	NoEnrichment	NA
47932	g12714	0.497213	0	NoEnrichment	NA
47937	g12715	0.135982	0	NoEnrichment	NA
47951	g12723	0.353193	0	NoEnrichment	sp|Q7Z5P9|MUC19_HUMAN
47955	g12724	0.636336	0.25454	NoEnrichment	sp|Q99323|MYSN_DROME
47983	g12732	0.853541	-0.31114	NoEnrichment	sp|Q8CIS0|CAR11_MOUSE
47987	g12733	-0.762705	0	NoEnrichment	NA
48010	g12734	0.818291	0.00196	NoEnrichment	sp|A0AVF1|IFT56_HUMAN
48016	g12734	0.2965	0.00196	NoEnrichment	sp|A0AVF1|IFT56_HUMAN
48022	g12737	0.493862	0	NoEnrichment	NA
48046	g12747	-0.0519809	-0.06064	NoEnrichment	sp|Q9BXL7|CAR11_HUMAN
48139	g4584	-0.21443	0	NoEnrichment	NA
48148	g4587	0.597421	0	NoEnrichment	NA
48152	g4592	0.626729	0.00526	NoEnrichment	sp|Q8C2A2|SEN54_MOUSE
48155	g4593	0.477156	0.00715	NoEnrichment	sp|Q8WXI3|ASB10_HUMAN
48175	g4599	1.43054	0.17127	Head	sp|P43146|DCC_HUMAN
48184	g4606	0.742069	0.11249	NoEnrichment	sp|Q0ZLH3|PJVK_HUMAN
48208	g4608	0.552818	0.0795	NoEnrichment	sp|Q9NRK6|ABCBA_HUMAN
48250	g4618	1.14008	0.02585	NoEnrichment	sp|P51523|ZNF84_HUMAN
48289	g4633	0.226766	0.01066	NoEnrichment	sp|Q5SP67|WDR26_DANRE
48292	g4634	0.457535	-0.00356	NoEnrichment	sp|P49961|ENTP1_HUMAN
48345	g4661	-0.230005	0	NoEnrichment	NA
48379	g743	0.4476	0.00965	NoEnrichment	sp|P0C6F1|DYH2_MOUSE
4843	g15277	0.171098	0	NoEnrichment	NA
48507	g9635	-0.408259	0	NoEnrichment	NA
4851	g15277	1.352	0	NoEnrichment	NA
48539	g9645	-0.128606	0	NoEnrichment	NA
48681	g5503	0.722893	0	NoEnrichment	NA
48683	g5503	0.247029	0	NoEnrichment	NA
48708	g10770	-0.0695354	0	NoEnrichment	NA
48750	g10779	0.0635355	0	NoEnrichment	sp|Q5EA92|AL14E_BOVIN
48803	g10796	-0.0166605	0.01196	NoEnrichment	sp|Q84PB3|IF4G1_ORYSJ
48930	g11880	-0.653451	0.04414	NoEnrichment	sp|Q17RW2|COOA1_HUMAN
48962	g4815	0.121383	0.05193	NoEnrichment	sp|Q9VW26|OAT_DROME
48963	g4815	0.406215	0.05193	NoEnrichment	sp|Q9VW26|OAT_DROME
48975	g4818	0.187207	0.02612	NoEnrichment	sp|Q86UB9|TM135_HUMAN
48999	g4835	-0.280902	0.00399	NoEnrichment	sp|P50747|BPL1_HUMAN
49018	g4847	-0.00825923	0	NoEnrichment	NA
49062	g4874	-0.197003	0	NoEnrichment	sp|Q5VYJ5|MALR1_HUMAN
49104	g4881	-0.174608	0	NoEnrichment	NA
49116	g7324	0.90452	0	NoEnrichment	NA
49139	g17038	0.851443	0	NoEnrichment	NA
49141	g17038	0.453582	0	NoEnrichment	NA
49158	g17042	0.476429	0.03035	NoEnrichment	sp|Q8IZF6|AGRG4_HUMAN
49159	g17042	0.409381	0.03035	NoEnrichment	sp|Q8IZF6|AGRG4_HUMAN
4921	g19568	0.0827479	0	NoEnrichment	NA
49211	g17052	0.446231	-0.00718	NoEnrichment	sp|Q9ZCN4|Y689_RICPR
49219	g17055	0.405351	0	NoEnrichment	NA
4923	g19568	0.33461	0	NoEnrichment	NA
4924	g19568	-0.353922	0	NoEnrichment	NA
4926	g19569	0.34328	0	NoEnrichment	NA
4937	g19577	-0.217265	0.17336	NoEnrichment	sp|Q9R1T3|CATZ_RAT
49509	g27299	-0.104016	0	NoEnrichment	NA
49555	g27311	0.36957	0	NoEnrichment	NA
49556	g27311	0.412141	0	NoEnrichment	NA
49559	g27313	-0.460202	0	NoEnrichment	NA
49562	g27314	0.150537	0	NoEnrichment	NA
49604	g27327	-0.0371306	0.01323	NoEnrichment	sp|Q9CR58|KMCP1_MOUSE
49605	g27327	0.105412	0.01323	NoEnrichment	sp|Q9CR58|KMCP1_MOUSE
49608	g27329	-0.19994	-0.52259	NoEnrichment	sp|P51121|GLNA_XENLA
49612	g27329	0.460637	-0.52259	NoEnrichment	sp|P51121|GLNA_XENLA
49618	g27330	0.552404	-0.06099	NoEnrichment	sp|Q04831|GLNA_PANAR
49639	g27334	1.07025	1.20888	Head	sp|Q04831|GLNA_PANAR
49640	g27334	0.790949	1.20888	Head	sp|Q04831|GLNA_PANAR
49666	g27341	-0.136202	0.07052	NoEnrichment	sp|Q9Z2W1|STK25_MOUSE
49705	g27355	-0.117257	0	NoEnrichment	NA
49730	g27363	0.707987	0.5764	NoEnrichment	sp|P10515|ODP2_HUMAN
49731	g27363	1.17578	0.5764	Head	sp|P10515|ODP2_HUMAN
49732	g27364	0.327249	0.13054	NoEnrichment	sp|P91943|PANG1_DROME
49735	g27364	2.50789	0.13054	NoEnrichment	sp|P91943|PANG1_DROME
49762	g3957	-0.145406	-0.12111	NoEnrichment	sp|Q803Q2|NDL1B_DANRE
4979	g19594	0.178202	0	NoEnrichment	NA
49796	g3974	0.56038	0.03905	NoEnrichment	sp|Q6S5C2|GNPTG_MOUSE
49797	g3974	0.332112	0.03905	NoEnrichment	sp|Q6S5C2|GNPTG_MOUSE
49801	g3974	-0.079067	0.03905	NoEnrichment	sp|Q6S5C2|GNPTG_MOUSE
49806	g3975	0.259961	0	NoEnrichment	NA
49848	g14466	0.446764	0.00328	NoEnrichment	sp|Q5R5T8|SVOP_PONAB
49867	g14472	0.198028	0.04349	NoEnrichment	sp|Q8BVU5|NUDT9_MOUSE
4988	g19597	0.456669	0	NoEnrichment	NA
49900	g14484	-0.192506	0	NoEnrichment	NA
49941	g14494	-0.573006	0.05777	NoEnrichment	sp|Q61097|KSR1_MOUSE
49969	g14504	-0.381822	0	NoEnrichment	NA
4997	g19602	0.0384421	-0.38437	NoEnrichment	sp|Q03347|RUNX1_MOUSE
49972	g14504	-0.625289	0	NoEnrichment	NA
50055	g14525	-0.203461	0.22022	NoEnrichment	sp|Q96AY4|TTC28_HUMAN
50061	g14529	-0.288816	0.00112	NoEnrichment	sp|Q9YHZ6|CDC45_XENLA
50074	g14533	0.188053	0	NoEnrichment	NA
50102	g14540	-0.521423	0.13619	NoEnrichment	sp|P70684|PGDH_CAVPO
50133	g14550	-0.228079	0.17244	NoEnrichment	sp|O14578|CTRO_HUMAN
50145	g14552	-0.196344	0.01199	NoEnrichment	sp|Q4V842|GPTC4_XENLA
50148	g14554	-0.445555	0.01533	NoEnrichment	sp|Q5R9D1|GATL3_PONAB
50180	g1226	1.41301	0	NoEnrichment	NA
50181	g1226	1.43708	0	NoEnrichment	NA
50213	g1232	0.152573	0	NoEnrichment	sp|D3YXG0|HMCN1_MOUSE
50214	g1232	0.0961762	0	NoEnrichment	sp|D3YXG0|HMCN1_MOUSE
50374	g12136	-0.2182	0	NoEnrichment	NA
50385	g12137	0.524221	0.04543	NoEnrichment	sp|Q5F480|ITPK1_CHICK
50393	g12139	0.542154	0	NoEnrichment	NA
50402	g12139	-0.40088	0	NoEnrichment	NA
50448	g12158	0.855749	0.03921	NoEnrichment	sp|P54394|DING_BACSU
50490	g30144	0.234144	0	NoEnrichment	NA
50541	g21746	-0.235155	0	NoEnrichment	NA
50547	NA	0.851704	0	NoEnrichment	NA
50567	g5429	-0.216636	0.00215	NoEnrichment	sp|G3V9H8|RET_RAT
50596	g5441	0.350483	0	NoEnrichment	sp|P35546|RET_MOUSE
50641	g5455	1.31569	0	NoEnrichment	NA
50644	g5455	2.17336	0	NoEnrichment	NA
50645	g5455	0.556603	0	NoEnrichment	NA
50708	g5483	-0.50415	-0.00012	NoEnrichment	sp|Q9GNN8|CTXA_CARAL
5080	g27504	-0.255077	0	NoEnrichment	NA
50824	g5297	-0.589924	0.44802	NoEnrichment	sp|D3ZHA0|FLNC_RAT
50863	g5312	-0.13595	0.03665	NoEnrichment	sp|Q9H2G9|GO45_HUMAN
50873	g5321	-0.616047	0	NoEnrichment	NA
50925	g5349	-0.396909	0	NoEnrichment	sp|P15513|MYOM1_APLCA
50979	g5380	-0.243163	0.13126	NoEnrichment	sp|Q9IA79|BI1_PAROL
50991	g30321	0.774714	0	NoEnrichment	NA
51054	g15647	0.161017	0	NoEnrichment	NA
51128	g15674	-0.368715	0.03029	NoEnrichment	sp|Q9Y5X5|NPFF2_HUMAN
51140	g15676	-0.157104	0.98184	NoEnrichment	sp|Q9QY94|GLNA_ACOCA
51155	g15679	0.962667	0	NoEnrichment	NA
51205	g15698	1.8102	0.1145	NoEnrichment	sp|Q5RCI4|CCD47_PONAB
51262	g26777	-0.226524	0.0166	NoEnrichment	sp|Q8BH86|CN159_MOUSE
51320	g18068	-0.31037	0	NoEnrichment	NA
51380	g12077	-0.161522	0.40513	NoEnrichment	sp|Q5T4S7|UBR4_HUMAN
51382	g12077	0.159735	0.40513	NoEnrichment	sp|Q5T4S7|UBR4_HUMAN
51387	g12079	0.255474	0	NoEnrichment	NA
51399	g12085	-0.0824061	0.007	NoEnrichment	sp|A8Y1P7|BRE4_CAEBR
51453	g12098	0.187619	-0.01322	NoEnrichment	sp|Q05910|ADAM8_MOUSE
51461	g12098	-0.101144	-0.01322	NoEnrichment	sp|Q05910|ADAM8_MOUSE
51462	g12098	-0.841232	-0.01322	NoEnrichment	sp|Q05910|ADAM8_MOUSE
51560	g25264	-0.459091	-0.00686	NoEnrichment	sp|P78325|ADAM8_HUMAN
51575	g25269	-0.232321	0	NoEnrichment	NA
51599	g25277	1.13257	0	NoEnrichment	NA
51630	g25284	0.442947	-0.02978	NoEnrichment	sp|Q3UZD5|PRDM6_MOUSE
51648	g25291	0.245877	0	NoEnrichment	NA
51697	g6855	0.332741	0	NoEnrichment	NA
51783	g6880	0.769771	-0.29151	NoEnrichment	sp|P53773|DLL1_XENLA
51786	g6880	0.674981	-0.29151	NoEnrichment	sp|P53773|DLL1_XENLA
51830	g1212	-0.167825	0	NoEnrichment	NA
51841	g1212	0.364753	0	NoEnrichment	NA
51847	NA	0.03036	0	NoEnrichment	NA
51873	g19469	-0.0049688	-0.01276	NoEnrichment	sp|O54774|AP3D1_MOUSE
51877	g19470	-0.293226	-0.04552	NoEnrichment	sp|Q91584|ELAV3_XENLA
51878	g19470	-0.0648968	-0.04552	NoEnrichment	sp|Q91584|ELAV3_XENLA
51930	g26604	-0.0552154	0	NoEnrichment	sp|Q8N328|PGBD3_HUMAN
51986	g26621	-0.3326	-0.03777	NoEnrichment	sp|Q9GT45|RS26_ANOGA
52022	NA	-0.489432	0	NoEnrichment	NA
52077	g3731	-0.359928	0.04339	NoEnrichment	sp|O75386|TULP3_HUMAN
52091	g3739	-0.487217	-0.0055	NoEnrichment	sp|P11277|SPTB1_HUMAN
52095	g3739	-0.042032	-0.0055	NoEnrichment	sp|P11277|SPTB1_HUMAN
52112	g3741	0.311904	0	NoEnrichment	NA
52149	g3755	-0.458095	0.14287	NoEnrichment	sp|P61315|G3ST3_MOUSE
52154	g3756	0.0945437	0.07714	NoEnrichment	sp|Q5RDQ3|AMERL_PONAB
52155	g3756	-0.292739	0.07714	NoEnrichment	sp|Q5RDQ3|AMERL_PONAB
52177	g3761	1.1445	0	NoEnrichment	NA
52188	g3763	-0.0753116	1.23571	NoEnrichment	sp|Q58A42|DD3_DICDI
52189	g3763	-0.0838036	1.23571	NoEnrichment	sp|Q58A42|DD3_DICDI
52194	g3763	0.321759	1.23571	NoEnrichment	sp|Q58A42|DD3_DICDI
52208	g3773	0.335804	0.08285	NoEnrichment	sp|Q58A42|DD3_DICDI
52209	g3774	0.110224	0.02126	NoEnrichment	sp|Q58A42|DD3_DICDI
52217	g3774	0.462477	0.02126	NoEnrichment	sp|Q58A42|DD3_DICDI
52310	g25843	-0.195221	0.00463	NoEnrichment	sp|Q9NQW5|PRDM7_HUMAN
52319	g25844	0.204721	0	NoEnrichment	NA
52370	g25854	-0.371881	0.00084	NoEnrichment	sp|Q9H1Y3|OPN3_HUMAN
52376	g25854	-0.639111	0.00084	NoEnrichment	sp|Q9H1Y3|OPN3_HUMAN
5247	g7301	0.130769	0	NoEnrichment	NA
52476	g25881	0.564883	0	NoEnrichment	NA
52477	g25881	0.14381	0	NoEnrichment	NA
52482	g25882	0.737737	0	NoEnrichment	NA
52552	g25905	0.558	0.06375	NoEnrichment	sp|Q75N90|FBN3_HUMAN
52553	g25905	0.877707	0.06375	NoEnrichment	sp|Q75N90|FBN3_HUMAN
52562	g25906	-0.374002	-0.05835	NoEnrichment	sp|O95263|PDE8B_HUMAN
52589	g25911	1.36606	0	NoEnrichment	sp|Q6AZB8|HARB1_DANRE
[truncated: 2,198 more rows]

## Sheet: Fig. 2C
ID	Regen LogFC	SC LogFC	Structure Enrichment	Swissprot Annotation
g10034	-0.0689037	-1.00295	NoEnrichment	sp|P08419|CEL2A_PIG
g10056	0.191039	-0.0584922	NoEnrichment	sp|P0CJ14|VP302_LYCMC
g10300	0.9038	0.200467	NoEnrichment	sp|Q76KP1|B4GN4_HUMAN
g10485	0.0212281	0.269183	NoEnrichment	NA
g10513	0.0536798	0.0338911	NoEnrichment	sp|Q9DB27|MCTS1_MOUSE
g10536	-0.151142	0.218315	NoEnrichment	sp|Q08874|MITF_MOUSE
g10594	0.113301	0.10339	NoEnrichment	sp|O35426|XBP1_MOUSE
g1063	0.0783274	0.0366566	NoEnrichment	sp|P0DN09|VKT5_ANEVI
g1064	0.0959693	0.0837701	NoEnrichment	sp|Q28864|TFPI1_MACMU
g10649	-0.109223	0.036739	NoEnrichment	sp|Q9VJ79|PDE11_DROME
g10650	0.603294	-0.0472527	NoEnrichment	sp|Q7LL04|YQK1_SCHPO
g10680	1.58497	-1.43203	NoEnrichment	sp|H2A0N9|KCP4_PINMG
g10706	-0.197661	-0.00713079	NoEnrichment	sp|P0CP96|FKBP2_CRYNJ
g10737	0.301107	-0.00347535	NoEnrichment	sp|D4AK17|PLCX1_ARTBC
g10787	-0.453049	0.737873	NoEnrichment	sp|D3ZHA0|FLNC_RAT
g10817	0.782743	0.0182345	NoEnrichment	sp|Q26627|SUREJ_STRPU
g10818	0.986887	0.0365797	NoEnrichment	sp|Q7TN88|PK1L2_MOUSE
g10850	-0.959579	-0.159369	NoEnrichment	NA
g10915	-0.15163	0.0394501	NoEnrichment	sp|P24288|BCAT1_MOUSE
g10932	-0.000269587	-0.000989353	NoEnrichment	sp|P29061|CHIB_TOBAC
g10933	0.251471	0.0362681	NoEnrichment	sp|Q9Y2H1|ST38L_HUMAN
g10944	-0.253473	-0.514939	NoEnrichment	sp|Q9PSX7|RHOC_CHICK
g10950	1.03712	-0.0934112	NoEnrichment	NA
g1096	0.0490022	-0.0628854	NoEnrichment	sp|Q63429|UBC_RAT
g10961	-0.284091	-0.0624291	NoEnrichment	sp|Q9CYL5|GAPR1_MOUSE
g10967	0.62851	0.0193439	NoEnrichment	NA
g10986	0.395217	-0.625599	NoEnrichment	NA
g11021	0.25711	0.0792719	NoEnrichment	sp|O76075|DFFB_HUMAN
g11058	-0.0879039	-0.110819	NoEnrichment	sp|C4R7Z3|C9MT_KOMPG
g11062	-0.0896196	0.95829	NoEnrichment	sp|Q9H4G4|GAPR1_HUMAN
g11095	-0.226138	0.0370561	NoEnrichment	sp|P97494|GSH1_MOUSE
g11134	-0.113829	-0.426786	NoEnrichment	NA
g11204	0.0099092	0.00766255	NoEnrichment	sp|Q54TR1|CFAD_DICDI
g1125	0.353329	-0.0312896	NoEnrichment	sp|Q00G26|PLIN5_HUMAN
g11351	0.16528	0.020799	NoEnrichment	sp|Q7SIB2|CO4A1_BOVIN
g11352	0.155606	0.202811	NoEnrichment	sp|P08120|CO4A1_DROME
g11353	0.158241	0.285775	NoEnrichment	sp|Q4ZJM7|OTOL1_MOUSE
g11354	0.18941	0.129132	NoEnrichment	sp|P05099|MATN1_CHICK
g11355	0.129832	0.262156	NoEnrichment	sp|P27393|CO4A2_ASCSU
g11363	0.0658773	0.0548955	NoEnrichment	sp|P35520|CBS_HUMAN
g11398	0.309918	-0.0460322	NoEnrichment	sp|Q7SXW3|LRC40_DANRE
g11444	2.22128	0.165414	Head	sp|Q9H7M6|ZSWM4_HUMAN
g11446	-0.225573	-0.00397157	NoEnrichment	NA
g11469	0.284169	0.0180654	NoEnrichment	NA
g11470	0.668304	0.10354	NoEnrichment	sp|Q96LW9|ZSC31_HUMAN
g11471	0.113042	0.37037	NoEnrichment	sp|P24044|CALM_PLAFA
g11501	0.886612	0.0416708	NoEnrichment	NA
g11528	-0.185999	0.357302	NoEnrichment	sp|P02466|CO1A2_RAT
g11588	-0.280905	-0.0127258	NoEnrichment	NA
g11692	0.0788235	0.0458	NoEnrichment	sp|Q9JJC6|RIPL1_MOUSE
g11696	0.0784936	1.60121	NoEnrichment	sp|P39921|TPM1_HYDVU
g11697	0.183435	-0.375287	NoEnrichment	sp|P55112|NAS4_CAEEL
g11698	0.68906	0.018786	NoEnrichment	sp|P55112|NAS4_CAEEL
g11714	0.11202	0.0184102	NoEnrichment	sp|Q9HCF6|TRPM3_HUMAN
g11718	1.19753	0.348396	NoEnrichment	NA
g11745	1.04869	0.370634	Head	sp|Q90623|MYPT1_CHICK
g1176	-0.17043	0.00503609	NoEnrichment	sp|P07942|LAMB1_HUMAN
g11765	-0.0936705	0.118922	NoEnrichment	sp|P54366|GSC_DROME
g11780	-1.26228	-0.117803	NoEnrichment	sp|Q62445|SP4_MOUSE
g11880	-0.543889	0.0441391	NoEnrichment	sp|Q17RW2|COOA1_HUMAN
g11950	0.91579	0.0556975	NoEnrichment	sp|Q8CFH6|SIK2_MOUSE
g11978	-0.560286	-0.0318129	NoEnrichment	sp|Q5EA92|AL14E_BOVIN
g1199	-0.0563322	0.0190036	NoEnrichment	sp|P42674|BP10_PARLI
g11994	0.613095	0.001449	NoEnrichment	NA
g11996	0.294709	0.0571628	NoEnrichment	sp|A5PN43|TM175_DANRE
g12040	1.16287	0.0218629	NoEnrichment	NA
g12061	0.160576	0.0697813	NoEnrichment	sp|Q08DQ2|GFPT2_BOVIN
g12120	-0.0950242	-0.221823	NoEnrichment	sp|P50280|MMP7_RAT
g12223	0.427861	0.329125	NoEnrichment	sp|D3ZDI6|MYLIP_RAT
g12231	-0.220955	-0.012964	NoEnrichment	sp|P81439|EQST_ACTEQ
g12236	1.1504	-0.203177	NoEnrichment	NA
g12259	-0.0195347	0.00134752	NoEnrichment	sp|Q80ZF8|AGRB3_MOUSE
g12274	1.19686	-0.581055	NoEnrichment	sp|G5ECQ2|FRIZ2_CAEEL
g12277	0.129494	-0.0109126	NoEnrichment	sp|Q5SRI9|MANEA_HUMAN
g12280	-0.11881	0.0163756	NoEnrichment	sp|Q6TGY8|EMC2_DANRE
g12434	-0.315905	0.00326688	NoEnrichment	sp|A4GTP4|ELK1_RAT
g12447	0.146902	-0.206787	NoEnrichment	sp|A4GTP4|ELK1_RAT
g12458	-0.745029	0.0019203	NoEnrichment	sp|P0C548|PLPL2_RAT
g12461	-0.0729251	-0.228784	NoEnrichment	sp|O18405|SURF4_DROME
g12471	0.288965	0.827842	NoEnrichment	NA
g1253	-0.208241	-0.00717547	NoEnrichment	NA
g1254	-0.733281	0.00613299	NoEnrichment	NA
g12567	1.16736	0.25858	NoEnrichment	sp|P48430|SOX2_CHICK
g12568	-0.042502	-0.00983874	NoEnrichment	NA
g12571	0.158306	0.000884446	NoEnrichment	sp|Q17QJ5|TSN5_BOVIN
g12585	0.0889021	0.00584209	NoEnrichment	sp|A2AVA0|SVEP1_MOUSE
g12639	-0.246734	0.00974445	NoEnrichment	NA
g12710	1.78887	0.122974	NoEnrichment	sp|P35283|RAB12_MOUSE
g12732	0.436225	-0.311141	NoEnrichment	sp|Q8CIS0|CAR11_MOUSE
g1275	-0.404239	0.193333	NoEnrichment	sp|P27918|PROP_HUMAN
g1276	-0.443724	0.315736	NoEnrichment	sp|Q96RW7|HMCN1_HUMAN
g12783	0.0591153	0.0478346	NoEnrichment	sp|Q9ULC3|RAB23_HUMAN
g1279	-0.343961	1.05754	NoEnrichment	NA
g12822	0.658183	-0.17135	NoEnrichment	NA
g12875	-0.248853	-0.22673	NoEnrichment	NA
g12884	0.0814073	-0.256995	NoEnrichment	sp|P80513|MANF_BOVIN
g12951	1.6393	-0.00918886	NoEnrichment	NA
g12992	0.68984	-0.00224238	NoEnrichment	sp|P69478|CHSTB_RAT
g1301	0.728976	0.104224	NoEnrichment	NA
g13019	-1.63471	-0.24173	NoEnrichment	sp|P16273|PRPX_HORVU
g13020	-0.583981	-0.258923	NoEnrichment	sp|P16273|PRPX_HORVU
g13058	0.171568	0.563128	NoEnrichment	sp|H6BDU4|SODC_CAMDR
g13063	-0.168045	-0.0127679	NoEnrichment	NA
g1320	0.90308	0.0398397	NoEnrichment	sp|Q8K007|SULF1_MOUSE
g13212	-0.246066	0.362513	NoEnrichment	sp|Q9Y6L7|TLL2_HUMAN
g13225	0.0152443	0.0466501	NoEnrichment	sp|O43172|PRP4_HUMAN
g13247	0.415058	-0.191004	NoEnrichment	sp|Q9KWN0|AHV_ACTSK
g13250	0.487453	-0.677375	NoEnrichment	sp|Q9KWN0|AHV_ACTSK
g13307	0.0638987	-0.0491849	NoEnrichment	sp|P41252|SYIC_HUMAN
g13309	0.105736	-0.0561068	NoEnrichment	sp|P41252|SYIC_HUMAN
g13376	0.188703	-0.0521342	NoEnrichment	sp|Q9GLY5|ITIH3_RABIT
g1338	-0.138236	0.0167738	NoEnrichment	sp|Q9GNN8|CTXA_CARAL
g13448	-0.155062	-0.0623207	NoEnrichment	sp|Q08759|MYB_XENLA
g13514	0.0467702	0.03402	NoEnrichment	sp|Q9BX10|GTPB2_HUMAN
g13544	0.083447	0.0262116	NoEnrichment	sp|O08992|SDCB1_MOUSE
g13587	2.02483	-0.0017216	NoEnrichment	sp|Q64121|PRLHR_RAT
g13619	1.4835	0.0122958	NoEnrichment	NA
g13748	0.158251	0.00782111	NoEnrichment	NA
g13749	0.164065	0.0159252	NoEnrichment	sp|Q8WXH0|SYNE2_HUMAN
g13759	-0.072718	-0.115701	NoEnrichment	sp|Q9UNL2|SSRG_HUMAN
g13801	0.131028	0.0207198	NoEnrichment	sp|Q5UQ60|YL662_MIMIV
g13803	0.0323861	-0.00713208	NoEnrichment	sp|Q6ING7|FLAD1_XENLA
g13929	-0.116123	1.20238	NoEnrichment	sp|Q5RA22|5NTC_PONAB
g14000	-0.117829	0.0431932	NoEnrichment	sp|Q00174|LAMA_DROME
g14018	-1.98359	-0.0578587	NoEnrichment	sp|Q15063|POSTN_HUMAN
g14048	0.3487	0.185443	NoEnrichment	sp|Q9UIK4|DAPK2_HUMAN
g14107	0.172857	0.0609118	NoEnrichment	sp|A8GCA7|RIMK_SERP5
g14213	0.178085	0.0113191	NoEnrichment	NA
g14220	-0.654947	-0.00606548	NoEnrichment	NA
g14229	1.58613	0.169721	Head	sp|Q9H772|GREM2_HUMAN
g14239	0.213123	-0.0031358	NoEnrichment	sp|Q9Y6W6|DUS10_HUMAN
g143	-0.0760846	0.0340106	NoEnrichment	sp|Q8BG58|P4HTM_MOUSE
g1435	-0.00435916	0.00829114	NoEnrichment	NA
g14380	0.435177	0.357508	NoEnrichment	sp|O77775|NCF2_BOVIN
g14383	0.0798805	0.269394	NoEnrichment	NA
g1439	-0.762451	0.0167997	NoEnrichment	NA
g14402	0.307687	0.180721	NoEnrichment	sp|Q6DG32|S2536_DANRE
g14470	1.06591	0.024505	NoEnrichment	sp|P53690|MMP14_MOUSE
g14473	0.0641939	0.0911093	NoEnrichment	NA
g1450	0.822759	-0.108714	NoEnrichment	sp|P18870|JUN_CHICK
g14502	-0.0619318	0.090567	NoEnrichment	sp|Q9BW91|NUDT9_HUMAN
g14514	0.177096	-0.00128572	NoEnrichment	NA
g1460	0.0875556	-0.108985	NoEnrichment	sp|Q9DBU3|RIOK3_MOUSE
g1461	1.64716	-0.0160577	NoEnrichment	NA
g14685	0.916584	-0.8788	NoEnrichment	sp|Q08E39|SPY2_BOVIN
g14688	0.453198	-0.0791206	NoEnrichment	sp|Q54TL0|KIF7_DICDI
g14694	0.166636	-0.0556719	NoEnrichment	sp|Q6GNJ8|VPS72_XENLA
g14708	-0.394705	-0.89279	NoEnrichment	NA
g1473	0.0791167	-0.000438292	NoEnrichment	sp|Q5USW0|GDF8_TAUDE
g14746	-0.101041	0.00645791	NoEnrichment	sp|Q9H324|ATS10_HUMAN
g14799	-0.0239745	-0.0287684	NoEnrichment	sp|Q86TX2|ACOT1_HUMAN
g14800	0.590317	-0.0176965	NoEnrichment	sp|Q8CGB3|UACA_MOUSE
g14801	0.37867	-0.131447	NoEnrichment	sp|Q80WQ9|ZBED4_MOUSE
g14855	-0.524862	-0.0771563	NoEnrichment	NA
g14866	0.264274	-0.0514334	NoEnrichment	sp|P25931|NPYR_DROME
g14912	-0.786012	0.3848	NoEnrichment	NA
g14938	1.14211	0.241047	Head	sp|O15169|AXIN1_HUMAN
g14978	0.20171	0.137766	NoEnrichment	NA
g14987	-0.0113442	0.00936518	NoEnrichment	sp|Q569D5|SBP1_XENTR
g15	0.0541082	-0.0176029	NoEnrichment	sp|P49355|FNTB_BOVIN
g15015	0.282633	0.178461	NoEnrichment	sp|P22757|HE_PARLI
g15069	-0.133254	0.0237848	NoEnrichment	sp|Q0VA16|WDR70_XENTR
g15095	-0.0345382	-0.00503267	NoEnrichment	sp|P19440|GGT1_HUMAN
g15120	-0.420641	-0.108429	NoEnrichment	sp|Q9CWS0|DDAH1_MOUSE
g15129	-0.296915	0.0698311	NoEnrichment	sp|P32020|NLTP_MOUSE
g15133	0.0733297	0.164011	NoEnrichment	sp|Q6MG82|PRRT1_RAT
g15165	-0.0187978	0.0169727	NoEnrichment	sp|P58058|NADK_MOUSE
g15181	0.726657	-0.473698	NoEnrichment	sp|Q3SZE3|PLPP3_BOVIN
g15185	-0.281536	0.00711618	NoEnrichment	sp|Q95334|AMPE_PIG
g15226	1.43733	0.0013844	NoEnrichment	sp|A6YP92|ARX_RAT
g15293	0.363419	-0.0278971	NoEnrichment	sp|Q98TB4|GDF8_OREMO
g15359	0.288882	0.379257	NoEnrichment	sp|O60481|ZIC3_HUMAN
g15375	0.041971	-0.00684305	NoEnrichment	NA
g15387	-0.400382	-0.296353	NoEnrichment	sp|Q566X8|DMX1B_DANRE
g1539	-0.210984	0.00257655	NoEnrichment	NA
g15442	0.0982603	0.0867413	NoEnrichment	NA
g15451	-1.14211	-0.0378777	NoEnrichment	sp|P47799|FSHR_HORSE
g15457	-0.0209534	0.152909	NoEnrichment	sp|O35815|ATX3_RAT
g15458	-0.0220867	-0.00752055	NoEnrichment	sp|B2LU20|SFXN1_SHEEP
g15493	-0.204047	0.185154	NoEnrichment	sp|Q8VHI3|OFUT2_MOUSE
g15494	1.7456	0.00040552	NoEnrichment	sp|Q8N2E2|VWDE_HUMAN
g15578	-0.0309619	0.00093911	NoEnrichment	NA
g15603	0.128921	0.507493	NoEnrichment	sp|Q9QYF1|RDH11_MOUSE
g15629	0.163898	0.0931493	NoEnrichment	sp|P18519|TNR16_CHICK
g15630	-0.0720591	-1.59152	NoEnrichment	sp|H2A0N9|KCP4_PINMG
g15640	-0.299264	0.162565	NoEnrichment	sp|Q9YIB7|ZIC2B_XENLA
g15667	-0.0998687	0.00506931	NoEnrichment	sp|P54001|P4HA1_RAT
g15668	0.0325436	0.00251827	NoEnrichment	sp|P10079|FBP1_STRPU
g15679	0.5876	0.165238	NoEnrichment	NA
g15773	0.725891	0.745809	NoEnrichment	NA
g15775	0.387018	0.0240724	NoEnrichment	NA
g15894	-1.15197	0.321289	NoEnrichment	sp|B5ZYI7|DUT_RHILW
g15913	1.96614	-0.0257083	NoEnrichment	sp|Q63ZI0|KCNK9_XENLA
g15980	-0.317752	0.000242161	NoEnrichment	sp|Q8IVL0|NAV3_HUMAN
g16071	0.189716	0.068956	NoEnrichment	sp|Q9LVK9|ALA7_ARATH
g1608	-0.151605	-0.139301	NoEnrichment	sp|P98155|VLDLR_HUMAN
g16165	2.96323	0.42501	Head	sp|Q61467|ZIC4_MOUSE
g16168	0.00697367	-0.219322	NoEnrichment	sp|Q90593|GRP78_CHICK
g16204	0.183384	-0.248408	NoEnrichment	sp|D3YXG0|HMCN1_MOUSE
g16227	-0.442232	0.00115645	NoEnrichment	sp|Q64077|NK2R_CAVPO
g1624	0.183346	0.222024	NoEnrichment	sp|Q61115|PTC1_MOUSE
g16330	-0.0519566	-0.0901412	NoEnrichment	sp|P48723|HSP13_HUMAN
g1642	0.194832	0.0317196	NoEnrichment	sp|A5PJM7|DEFI8_BOVIN
g16431	-0.34384	0.135398	NoEnrichment	sp|Q9P2N4|ATS9_HUMAN
g16491	0.718	-0.0661158	NoEnrichment	sp|P51984|CREB_HYDVD
g16493	2.93481	0.0097513	NoEnrichment	NA
g16500	-0.992456	-0.000202464	NoEnrichment	sp|P46824|KLC_DROME
g16557	1.0823	-0.0122276	NoEnrichment	sp|Q09604|VAB15_CAEEL
g16717	0.134548	0.00192612	NoEnrichment	sp|P58478|HTPG_RICCN
g16788	-0.195529	0.0636796	NoEnrichment	NA
g16805	0.201165	0.00235355	NoEnrichment	sp|O75445|USH2A_HUMAN
g16879	-0.558225	-0.122249	NoEnrichment	sp|Q9VSF3|UBC12_DROME
g16882	0.426894	-2.58187	NoEnrichment	NA
g1696	-0.412685	-0.00496216	NoEnrichment	sp|O95490|AGRL2_HUMAN
g16973	2.69158	0.00489518	NoEnrichment	sp|Q6WZ18|NGB_CANLF
g1705	1.0788	-0.0332566	NoEnrichment	sp|Q8N8A2|ANR44_HUMAN
g1718	0.996203	0.219396	NoEnrichment	sp|P69478|CHSTB_RAT
g17202	0.00283192	0.302048	NoEnrichment	sp|P70191|TRAF5_MOUSE
g17212	-0.166279	-0.00364884	NoEnrichment	sp|Q18297|TRPA1_CAEEL
g17270	-0.216885	0.0109511	NoEnrichment	sp|P00630|PA2_APIME
g17348	0.380061	-0.134648	NoEnrichment	sp|A0A0K3AWM6|MOM5_CAEEL
g17371	0.0668912	0.038924	NoEnrichment	sp|Q5F408|SYCC_CHICK
g17372	-0.145195	0.00188387	NoEnrichment	sp|P55268|LAMB2_HUMAN
g1743	0.144459	0.100279	NoEnrichment	sp|Q16363|LAMA4_HUMAN
g17465	2.20788e-05	-0.101327	NoEnrichment	sp|Q9H8Y8|GORS2_HUMAN
g17469	0.541041	0.00114841	NoEnrichment	NA
g17506	-0.167948	-0.00459766	NoEnrichment	sp|P54707|AT12A_HUMAN
g17635	0.0263663	0.0218963	NoEnrichment	sp|Q18297|TRPA1_CAEEL
g17667	-0.138212	-0.00560952	NoEnrichment	sp|Q3UGY8|BIG3_MOUSE
g1771	-0.18364	-2.35285	NoEnrichment	sp|Q9VYN8|TENA_DROME
g17730	0.00745465	-0.0362964	NoEnrichment	sp|Q8N2M4|TM86A_HUMAN
g17774	-0.00464732	0.0325255	NoEnrichment	sp|Q5BLE8|RETST_DANRE
g17795	0.0503487	0.00369039	NoEnrichment	sp|Q61847|MEP1B_MOUSE
g1782	-0.203372	0.0347269	NoEnrichment	sp|P35668|GSHB_XENLA
g17848	0.417997	-0.0151068	NoEnrichment	sp|Q92481|AP2B_HUMAN
g17880	-0.0897987	-0.0497672	NoEnrichment	sp|Q2PFN5|SPY2_MACFA
g17891	-0.0789483	-0.0215911	NoEnrichment	sp|Q93YS4|AB22G_ARATH
g17908	0.412571	0.0714364	NoEnrichment	sp|Q75N90|FBN3_HUMAN
g17917	0.685264	0.564832	NoEnrichment	sp|Q27052|FCA1_TRYRA
g17928	-0.0454825	0.962787	NoEnrichment	NA
g17949	-0.471312	0.00664838	NoEnrichment	sp|Q7Z494|NPHP3_HUMAN
g17979	0.46549	0.236349	NoEnrichment	sp|P02510|CRYAB_BOVIN
g17982	-0.225088	0.0864028	NoEnrichment	sp|P02510|CRYAB_BOVIN
g17988	0.791208	0.171285	NoEnrichment	sp|P02510|CRYAB_BOVIN
g17998	0.166461	0.229019	NoEnrichment	sp|P02510|CRYAB_BOVIN
g18016	-0.368219	0.0122789	NoEnrichment	sp|Q11126|FUT3_BOVIN
g18017	0.150616	0.0516563	NoEnrichment	sp|Q11128|FUT5_HUMAN
g18022	-0.0333376	0.0156485	NoEnrichment	NA
g18029	0.0503542	0.0693265	NoEnrichment	NA
g181	0.63142	0.173634	NoEnrichment	sp|Q60738|ZNT1_MOUSE
g18200	1.19465	-0.170932	NoEnrichment	sp|Q99578|RIT2_HUMAN
g18215	0.470341	0.028089	NoEnrichment	sp|Q9BQS2|SYT15_HUMAN
g18277	-0.217126	2.01324	NoEnrichment	sp|Q9H4G4|GAPR1_HUMAN
g18285	-0.386986	0.00166336	NoEnrichment	NA
g18299	-0.417341	0.00165346	NoEnrichment	sp|P10079|FBP1_STRPU
g18303	-0.112123	0.00128575	NoEnrichment	sp|P10079|FBP1_STRPU
g18321	0.154955	-0.400191	NoEnrichment	NA
g18331	0.223328	0.0447747	NoEnrichment	NA
g1834	0.0385725	-0.00395674	NoEnrichment	sp|Q5NVI9|DNJA1_PONAB
g18373	-0.307838	0.147176	NoEnrichment	NA
g18439	-0.481323	0.251536	NoEnrichment	NA
g18477	-0.425547	0.087979	NoEnrichment	sp|Q5TJ56|FORF_DICDI
g18524	0.049608	0.0423136	NoEnrichment	NA
g18525	0.0621203	0.0505477	NoEnrichment	sp|O15014|ZN609_HUMAN
g18549	-0.0696174	0.0111226	NoEnrichment	NA
g1858	0.274982	0.000306417	NoEnrichment	sp|Q2Z1R2|SOX1B_DANRE
g18690	-0.388724	0.0326215	NoEnrichment	sp|O75762|TRPA1_HUMAN
g18700	0.103379	0.0164278	NoEnrichment	sp|Q9QXM0|ABHD2_MOUSE
g18717	0.190051	-1.13374	NoEnrichment	NA
g18737	0.450662	-0.00478311	NoEnrichment	sp|Q6NVD0|FREM2_MOUSE
g18743	0.0317651	-0.0123812	NoEnrichment	sp|Q5SZK8|FREM2_HUMAN
g18779	-0.523111	-0.409123	NoEnrichment	sp|Q61041|NPY4R_MOUSE
g18842	0.693032	0.109993	NoEnrichment	sp|Q6DID7|WLS_MOUSE
g18947	0.181436	0.0682492	NoEnrichment	sp|Q8NB14|UBP38_HUMAN
g18951	0.0779574	0.237563	NoEnrichment	sp|P38571|LICH_HUMAN
g18952	-0.129428	0.0299699	NoEnrichment	sp|O15072|ATS3_HUMAN
g18982	-0.0356644	0.00465105	NoEnrichment	sp|P34908|BRAF_COTJA
g18986	0.0484987	0.00365389	NoEnrichment	sp|P15056|BRAF_HUMAN
g19012	0.484845	-0.33529	NoEnrichment	sp|Q7LL04|YQK1_SCHPO
g19215	0.394464	-0.0621801	NoEnrichment	NA
g19216	0.0962152	0.00335	NoEnrichment	sp|Q6GQB9|EDEM3_XENLA
g19230	-0.0316076	0.043227	NoEnrichment	sp|Q9EQX4|AIF1L_MOUSE
g19253	1.05061	0.559961	Head	sp|P47728|CALB2_RAT
g19275	-0.0939148	0.0205905	NoEnrichment	sp|Q6NSM8|SIK3_DANRE
g19288	0.249198	0.0295062	NoEnrichment	sp|Q967D7|TUTL_DROME
g19310	0.331183	0.020284	NoEnrichment	sp|Q01262|HYUA_PSESN
g19355	1.04637	-0.0784977	NoEnrichment	NA
g19363	-0.396263	0.110955	NoEnrichment	sp|Q32NH8|PLCD4_XENLA
g194	-0.0999989	0.017305	NoEnrichment	sp|Q59536|PTRB_MORLA
g19401	0.0460209	-0.25595	NoEnrichment	sp|Q9JI85|NUCB2_RAT
g19404	-0.0775929	0.00359135	NoEnrichment	sp|Q15058|KIF14_HUMAN
g1942	-0.262982	0.0192822	NoEnrichment	sp|Q6DHR8|NGBR_DANRE
g19421	-0.238986	0.0618572	NoEnrichment	sp|O08629|TIF1B_RAT
g19422	-0.226588	0.000265768	NoEnrichment	NA
g19496	0.290853	-0.376124	NoEnrichment	sp|P63255|CRIP1_RAT
g19531	0.594344	1.70779	NoEnrichment	NA
g19567	0.0125742	-0.00455811	NoEnrichment	sp|Q9R0U0|SRS10_MOUSE
g19568	-1.02262	-0.346505	NoEnrichment	NA
g19677	-0.0388636	0.0572708	NoEnrichment	sp|A7RWD2|CIAO1_NEMVE
g1973	0.30078	0.330711	NoEnrichment	sp|Q52KG5|KI26A_MOUSE
g19768	0.892859	0.0156583	NoEnrichment	sp|P32254|RASS_DICDI
g19890	1.63757	0.00244616	NoEnrichment	NA
g19927	1.05334	0.0114392	NoEnrichment	sp|P06727|APOA4_HUMAN
g19973	0.525645	0.00455243	NoEnrichment	sp|P91953|HE_HEMPU
g19975	-0.212561	-0.0344097	NoEnrichment	sp|Q54RZ7|Y1199_DICDI
g19984	0.511125	0.00171484	NoEnrichment	sp|Q02225|SKI_XENLA
g20012	0.763573	0.215235	NoEnrichment	NA
g20037	1.35051	-0.0229023	NoEnrichment	NA
g2004	0.139562	0.122676	NoEnrichment	sp|Q6NUX8|RHOAA_DANRE
g20083	0.723286	-0.0400152	NoEnrichment	sp|O57525|CP17A_RANDY
g20086	-0.212914	-1.41541e-05	NoEnrichment	sp|Q19849|EGL44_CAEEL
g20096	0.148727	0.0791024	NoEnrichment	NA
g2010	-0.129532	0.0544533	NoEnrichment	sp|O94827|PKHG5_HUMAN
g2011	0.118866	-0.01946	NoEnrichment	sp|O94827|PKHG5_HUMAN
g20117	0.139852	-0.019042	NoEnrichment	NA
g2028	0.318371	0.365962	NoEnrichment	NA
g20340	-0.246237	0.238051	NoEnrichment	NA
g20349	0.324308	0.282949	NoEnrichment	sp|P64922|Y2028_MYCBO
g2038	-0.843673	0.71985	NoEnrichment	sp|P35400|GRM7_RAT
g20537	0.392156	-0.0518271	NoEnrichment	sp|Q08790|BLC_VIBCH
g20552	0.203655	0.00216985	NoEnrichment	sp|K7Z9Q9|VMP_NEMVE
g20553	0.30134	0.00962633	NoEnrichment	sp|P31579|LCE_ORYLA
g2061	0.057831	0.000814308	NoEnrichment	sp|Q8VHN7|GPR98_MOUSE
g20613	1.08968	0.0494197	NoEnrichment	NA
g20637	-0.0799274	-0.0852007	NoEnrichment	sp|A2VDZ3|MEF2A_BOVIN
g2068	0.924299	-0.048463	NoEnrichment	NA
g20685	0.0930857	0.0596015	NoEnrichment	sp|P47032|PRY1_YEAST
g20686	-0.0595987	0.27376	NoEnrichment	NA
g20690	0.496103	-0.137998	NoEnrichment	sp|Q6TXF1|ARRD3_RAT
g20700	-0.120413	0.0481845	NoEnrichment	sp|Q7TPQ9|ARRD3_MOUSE
g20769	-0.350685	-0.0846117	NoEnrichment	sp|P78412|IRX6_HUMAN
g20774	0.375296	-0.114692	NoEnrichment	sp|Q55874|Y103_SYNY3
g20792	0.2282	0.278408	NoEnrichment	sp|Q8IVN8|SBSPO_HUMAN
g20826	0.328005	0.00186279	NoEnrichment	sp|Q2VLG6|C163A_CANLF
g20832	0.0346899	-0.0686121	NoEnrichment	sp|Q95218|DMBT1_RABIT
g20857	-0.222637	-0.000983743	NoEnrichment	sp|A6QLU6|AGRD1_BOVIN
g20911	-1.08914	-0.192177	NoEnrichment	sp|P23770|GATA2_XENLA
g20918	-0.126542	-0.32408	NoEnrichment	sp|P35360|OPSL_LIMPO
g20991	0.480539	0.540461	NoEnrichment	sp|P46088|GST_NOTSL
g20995	-0.301366	2.58734	NoEnrichment	sp|P46088|GST_NOTSL
g21006	-1.44435	-0.0515483	NoEnrichment	sp|Q9U518|ASPG_DIRIM
g21025	-0.0691621	-0.00273031	NoEnrichment	NA
g21055	0.0345071	-0.208515	NoEnrichment	sp|Q29RV1|PDIA4_BOVIN
g21056	-0.0275244	-0.0672397	NoEnrichment	sp|Q29RV1|PDIA4_BOVIN
g21065	0.131588	-0.0572037	NoEnrichment	sp|Q5R9A4|DNJB9_PONAB
g21066	0.826259	0.19055	NoEnrichment	NA
g21076	0.907342	0.0843889	NoEnrichment	sp|A4IIJ3|KIBRA_XENTR
g21088	-0.336922	0.0203325	NoEnrichment	sp|Q16720|AT2B3_HUMAN
g21095	0.0664886	0.0107515	NoEnrichment	sp|Q6IE82|JADE3_MOUSE
g2111	-0.242877	0.155548	NoEnrichment	sp|Q80VL3|PRIC3_MOUSE
g21163	-0.990347	0.0624584	NoEnrichment	NA
g21174	0.719575	0.133973	NoEnrichment	sp|P43368|CAN3_PIG
g21219	-0.438675	-0.884419	NoEnrichment	sp|Q90623|MYPT1_CHICK
g21247	-0.0694616	0.000331786	NoEnrichment	sp|A0A0R4IBK5|R213A_DANRE
g21270	0.813205	0.00749495	NoEnrichment	sp|Q0V7M1|KPSH1_BOVIN
g21488	0.144484	-0.00937347	NoEnrichment	sp|O57422|OPN4B_XENLA
g21491	0.880164	0.0177149	NoEnrichment	sp|P30974|TLR1_DROME
g21702	0.203362	0.00969653	NoEnrichment	sp|Q8CIW6|S26A6_MOUSE
g21713	0.254875	0.0123931	NoEnrichment	sp|Q8CIW6|S26A6_MOUSE
g21760	0.268078	0.0312231	NoEnrichment	sp|P55112|NAS4_CAEEL
g21761	3.01095	0.00202257	NoEnrichment	sp|Q9Y5R5|DMRT2_HUMAN
g21798	0.443999	-0.00661843	NoEnrichment	sp|Q8BGF8|S35D3_MOUSE
g2189	0.540124	-0.133179	NoEnrichment	NA
g2192	0.456572	-0.111371	NoEnrichment	sp|Q8TE12|LMX1A_HUMAN
g21976	0.266599	0.175417	NoEnrichment	sp|O95057|DIRA1_HUMAN
g2198	-0.945851	-1.74497	NoEnrichment	sp|Q8N8K9|K1958_HUMAN
g22025	-0.131574	-0.00364588	NoEnrichment	sp|Q75M08|PDI21_ORYSJ
g22058	-0.106425	0.00287483	NoEnrichment	sp|P10079|FBP1_STRPU
g22086	0.160669	0.00332419	NoEnrichment	sp|Q5XGS8|GTPB1_XENLA
g22087	0.355135	0.0190246	NoEnrichment	sp|Q5XGS8|GTPB1_XENLA
g22088	0.247778	-0.0101365	NoEnrichment	sp|D2XV59|GTPB1_RAT
g22100	-0.137414	0.0584778	NoEnrichment	sp|Q4KM30|DESI1_RAT
g22112	0.137032	-0.584832	NoEnrichment	sp|Q91Z92|B3GT6_MOUSE
g22114	1.36308	-0.813302	NoEnrichment	NA
g22132	0.104864	-0.0133715	NoEnrichment	NA
g22137	-0.845221	-0.000964629	NoEnrichment	sp|P50129|5HT2A_PIG
g22186	-0.414139	-0.0444889	NoEnrichment	sp|Q91175|ADA1A_ORYLA
g22197	0.385666	0.000348037	NoEnrichment	sp|P07805|DCOR_TRYBB
g22221	-0.273366	0.0226864	NoEnrichment	NA
g22226	0.0236341	-0.0318834	NoEnrichment	sp|P21369|PNCA_ECOLI
g22258	-0.0147896	0.19336	NoEnrichment	sp|Q62165|DAG1_MOUSE
g22286	0.150413	-0.138058	NoEnrichment	sp|B3VSC2|TSN9_SHEEP
g22317	0.747709	-0.384083	NoEnrichment	sp|Q0VCJ7|RERG_BOVIN
g22319	-0.35879	-0.17914	NoEnrichment	sp|Q7T163|KDIS_DANRE
g22348	-0.581281	0.0316434	NoEnrichment	NA
g22533	0.608683	0.480646	NoEnrichment	sp|Q9BQE3|TBA1C_HUMAN
g22555	-0.002052	0.267876	NoEnrichment	sp|P07942|LAMB1_HUMAN
g22557	0.12069	0.0421316	NoEnrichment	sp|Q61116|ZN235_MOUSE
g22585	0.674421	0.210078	NoEnrichment	sp|Q91Z46|DUS7_MOUSE
g22615	0.37656	-0.445351	NoEnrichment	sp|Q8HYJ7|FUT5_GORGO
g22655	0.132177	-0.0505227	NoEnrichment	sp|Q63690|BAX_RAT
g2266	-0.00573705	0.048069	NoEnrichment	NA
g22665	0.0402678	0.0289694	NoEnrichment	sp|Q9ES87|PRSS8_RAT
g22680	-0.0731534	0.00893181	NoEnrichment	sp|Q3E6S9|CNIF3_ARATH
g22718	0.0314631	0.162966	NoEnrichment	sp|P11845|IPP2_RABIT
g2273	-0.131042	-0.128722	NoEnrichment	NA
g22734	0.027663	0.0975495	NoEnrichment	sp|P11279|LAMP1_HUMAN
g2274	0.329014	-0.220448	NoEnrichment	NA
g22822	-1.25811	0.00228193	NoEnrichment	NA
g22852	-0.0866321	0.0109353	NoEnrichment	sp|Q5TAX3|TUT4_HUMAN
g22869	0.692024	-0.000740621	NoEnrichment	NA
g22879	-0.10648	-0.792292	NoEnrichment	sp|Q8WWF8|CAPSL_HUMAN
g2288	-0.290731	-0.0333582	NoEnrichment	NA
g22916	-0.108896	0.00432908	NoEnrichment	sp|P85857|GDF6A_DANRE
g22919	0.242177	0.00195705	NoEnrichment	sp|Q5SPC5|OTOF_DANRE
g22933	-0.320447	0.290902	NoEnrichment	sp|Q9NR82|KCNQ5_HUMAN
g22934	1.76681	0.58917	Head	NA
g22990	0.278297	0.0948492	NoEnrichment	sp|Q32PV0|GULP1_DANRE
g23047	-0.382357	-0.27464	NoEnrichment	sp|P97819|PLPL9_MOUSE
g23048	0.217968	-0.00460889	NoEnrichment	sp|P97570|PLPL9_RAT
g23069	-0.442577	-0.00407223	NoEnrichment	NA
g23088	0.00862947	0.074449	NoEnrichment	sp|A2AJ15|MA1B1_MOUSE
g23103	-0.592525	-0.0785129	NoEnrichment	NA
g23108	-0.258242	0.000544493	NoEnrichment	sp|Q6L9W6|B4GN3_HUMAN
g23109	0.491515	0.308757	NoEnrichment	NA
g23186	0.273319	0.00699822	NoEnrichment	NA
g23193	-0.0585088	0.00378405	NoEnrichment	sp|P19246|NFH_MOUSE
g23249	0.549912	0.158297	NoEnrichment	NA
g23252	0.608028	0.0527263	NoEnrichment	sp|P23508|CRCM_HUMAN
g23270	0.55385	0.149153	NoEnrichment	sp|Q7ZTV5|FSHR_CAIMO
g2328	-0.0573784	-0.0196605	NoEnrichment	sp|P54864|JUN_SERCA
g23304	0.323944	-0.00240772	NoEnrichment	sp|Q8CHN8|MASP1_RAT
g23347	-0.24014	0.00728273	NoEnrichment	sp|Q29243|DAG1_PIG
g23352	0.178905	0.0106449	NoEnrichment	NA
g23371	0.0258888	0.00128007	NoEnrichment	sp|Q9CYL5|GAPR1_MOUSE
g234	0.315975	1.44694	NoEnrichment	sp|P05933|CALM_SCHPO
g23416	0.653207	0.297477	NoEnrichment	sp|Q7YRZ9|MCL1_FELCA
g23418	-0.104552	-0.0448559	NoEnrichment	sp|Q99L28|RLP24_MOUSE
g23421	0.909788	-0.686861	NoEnrichment	sp|Q82P90|IABF_STRAW
g23429	0.0691121	-0.187915	NoEnrichment	sp|A3DEX6|RSGI5_CLOTH
g23571	0.526854	-0.0220169	NoEnrichment	NA
g23588	1.58369	0.874835	Head	sp|Q61382|TRAF4_MOUSE
g23600	0.180803	0.000426978	NoEnrichment	sp|E7FKV8|PK1L1_ORYLA
g23621	0.150239	0.105963	NoEnrichment	sp|Q9BX70|BTBD2_HUMAN
g23692	0.324245	0.0987066	NoEnrichment	sp|Q8VIJ8|NPRL3_MOUSE
g23720	0.619795	-0.174327	NoEnrichment	sp|P79702|FOS_CYPCA
g2385	-0.163371	-0.184189	NoEnrichment	sp|Q684P5|RPGP2_HUMAN
g23858	0.184284	0.000833738	NoEnrichment	sp|Q6A548|TERT_CANLF
g23859	1.19829	0.222953	Head	sp|P02640|VILI_CHICK
g23878	-0.110642	0.0422057	NoEnrichment	sp|Q7ZZC8|NEK9_XENLA
g23880	-0.102764	0.0134402	NoEnrichment	sp|Q8N129|CNPY4_HUMAN
g23916	-1.52507	0.161895	NoEnrichment	NA
g2398	-0.233981	-0.000775299	NoEnrichment	sp|D3YXG0|HMCN1_MOUSE
g24008	-0.0888274	-0.00211629	NoEnrichment	sp|P47033|PRY3_YEAST
g2402	-0.279864	-0.00179244	NoEnrichment	sp|Q9P2N4|ATS9_HUMAN
g24024	2.98125	0.131442	NoEnrichment	sp|Q91X58|ZFN2B_MOUSE
g24036	0.441434	-1.02286	NoEnrichment	NA
g24037	0.353199	-0.00217098	NoEnrichment	NA
g24039	-0.0315612	-0.00891473	NoEnrichment	sp|Q3TZM9|ALG11_MOUSE
g24114	0.15838	0.384602	NoEnrichment	sp|Q28FN6|OTX2_XENTR
g24126	0.888416	0.134777	NoEnrichment	sp|O42097|FOXA2_ORYLA
g24129	0.00647515	-0.0349067	NoEnrichment	sp|Q5RF84|UB2G2_PONAB
g24130	0.209968	-0.0582933	NoEnrichment	sp|Q80ZD3|S2611_MOUSE
g24147	-0.0243622	0.402892	NoEnrichment	NA
g24191	1.03546	0.875905	NoEnrichment	sp|Q28107|FA5_BOVIN
g24228	0.459183	-0.00888434	NoEnrichment	sp|Q6DFF6|KLH20_XENLA
g24241	0.864219	1.20745	NoEnrichment	sp|Q6DIP5|EMAL4_XENTR
g24257	0.158518	0.050356	NoEnrichment	NA
g24294	0.0708644	-0.0745202	NoEnrichment	sp|Q9JHJ7|TEST_MOUSE
g24307	-1.05793	0.00434233	NoEnrichment	sp|Q68ED2|GRM7_MOUSE
g24323	0.747233	0.00277216	NoEnrichment	NA
g24349	0.24851	0.328746	NoEnrichment	NA
g24356	-0.36589	-0.147993	NoEnrichment	NA
g24360	-0.0222874	-0.0156501	NoEnrichment	sp|Q7SXV9|CALUB_DANRE
g24398	-0.140072	0.00550668	NoEnrichment	sp|Q6INC8|VGLU1_XENLA
g2440	-0.0191551	0.0227634	NoEnrichment	NA
g24406	-0.53492	-0.113701	NoEnrichment	sp|P11362|FGFR1_HUMAN
g24476	-0.157868	-0.000312552	NoEnrichment	sp|P10079|FBP1_STRPU
g24483	0.946347	0.806815	Head	sp|P70211|DCC_MOUSE
g24547	0.129259	0.266663	NoEnrichment	sp|Q8WSF1|H33_TRIPS
g2461	-0.2006	-0.0106316	NoEnrichment	sp|Q90268|PAX2A_DANRE
g24677	-0.419623	0.0186181	NoEnrichment	sp|Q03014|HHEX_HUMAN
g24678	0.883394	0.103001	NoEnrichment	sp|Q04972|VIPA_SALTI
g24679	0.35282	0.0803536	NoEnrichment	sp|Q04973|VIPB_SALTI
g24716	0.120342	0.00370771	NoEnrichment	sp|O57457|E41L4_DANRE
g24777	-0.0826361	0.000835007	NoEnrichment	sp|Q7RTS6|OTOP2_HUMAN
g24822	-0.0160074	-0.142157	NoEnrichment	sp|P15253|CALR_RABIT
g24876	0.0540642	0.0473696	NoEnrichment	NA
g24883	0.524982	-0.263683	NoEnrichment	NA
g24903	-0.225754	0.0490758	NoEnrichment	sp|P29146|NECA_HYDVU
g24911	0.493276	-0.234645	NoEnrichment	NA
g24930	0.0547376	-0.0358622	NoEnrichment	sp|Q5SPH9|RT10_DANRE
g24936	-1.99144	0.146749	NoEnrichment	sp|Q54HW1|PSD10_DICDI
g24952	1.90995	0.524251	Head	sp|O15178|BRAC_HUMAN
g24983	-0.418527	0.18512	NoEnrichment	sp|O75132|ZBED4_HUMAN
g25021	-0.392368	0.0207887	NoEnrichment	sp|P97292|HRH2_MOUSE
g25044	0.842377	0.236087	NoEnrichment	NA
g25079	0.271593	0.288991	NoEnrichment	NA
g25080	0.347761	0.342063	NoEnrichment	NA
g25127	-0.937896	-0.0923103	NoEnrichment	sp|A8TSS9|DMTA2_MONAL
g25137	-0.0344899	0.0254267	NoEnrichment	sp|Q28620|NPT2A_RABIT
g25176	0.643823	0.167207	NoEnrichment	sp|Q5RBA5|SQSTM_PONAB
g25238	-0.071503	0.0460433	NoEnrichment	sp|Q08D62|MAEL_XENTR
g25321	0.589983	0.0367295	NoEnrichment	NA
g25356	0.320731	-0.192955	NoEnrichment	sp|P35555|FBN1_HUMAN
g25362	0.415371	-0.00482181	NoEnrichment	sp|O88281|MEGF6_RAT
g25364	-0.184304	0.050143	NoEnrichment	sp|P41041|CALM_PNECA
g25416	-0.127193	0.0189465	NoEnrichment	sp|P24802|PLOD1_CHICK
g25532	-0.359485	-0.0526146	NoEnrichment	sp|O95980|RECK_HUMAN
g25539	0.215058	0.0241322	NoEnrichment	sp|Q0V8T4|CTP5C_RAT
g25556	0.488806	0.162561	NoEnrichment	sp|A7E2S9|A30BL_HUMAN
g25557	1.62759	-0.00727184	NoEnrichment	sp|Q9H1Y3|OPN3_HUMAN
g25581	0.0904265	-0.0270696	NoEnrichment	sp|Q2KJG3|SYNC_BOVIN
g25724	-0.109916	0.0696347	NoEnrichment	sp|P49354|FNTA_HUMAN
g25747	-0.11149	-0.0169009	NoEnrichment	sp|Q99715|COCA1_HUMAN
g25768	0.231973	0.00811587	NoEnrichment	sp|Q5R5F8|PANK4_PONAB
g25771	-0.405363	0.108113	NoEnrichment	sp|P38977|ANTA_HYDVU
g25773	-0.2891	0.0695772	NoEnrichment	sp|P38977|ANTA_HYDVU
g258	0.00308202	0.397877	NoEnrichment	sp|Q24UI6|IF2_DESHY
g25824	1.16323	0.0533126	NoEnrichment	NA
g25854	-0.774448	0.000840451	NoEnrichment	sp|Q9H1Y3|OPN3_HUMAN
g25893	2.35188	0.239354	Head	NA
g25927	0.124111	0.00616229	NoEnrichment	NA
g26061	0.629244	0.00465684	NoEnrichment	sp|P48740|MASP1_HUMAN
g2608	0.00442008	0.408932	NoEnrichment	sp|Q7SZ59|RASLC_DANRE
g26083	-0.609575	-0.00404598	NoEnrichment	sp|P51399|LOX5_MESAU
g2609	-0.0975164	0.0824919	NoEnrichment	sp|O93530|WRN_XENLA
g26213	-0.423859	0.0703521	NoEnrichment	sp|O75486|SUPT3_HUMAN
g26244	0.311514	-0.00628906	NoEnrichment	sp|Q04637|IF4G1_HUMAN
g26250	0.0924565	0.036712	NoEnrichment	NA
g26294	0.240521	0.286906	NoEnrichment	sp|Q9H0J9|PAR12_HUMAN
g26299	0.0472541	0.00600545	NoEnrichment	sp|Q9NR09|BIRC6_HUMAN
g26375	0.142511	0.0148594	NoEnrichment	sp|Q6NWZ9|CDO1_DANRE
g26569	-0.0314838	-0.0576932	NoEnrichment	sp|Q96UM2|LAC3_BOTFU
g26570	0.102564	-0.0382935	NoEnrichment	sp|Q96WM9|LAC2_BOTFU
g26573	0.104834	-0.00680177	NoEnrichment	sp|Q96WM9|LAC2_BOTFU
g26583	-0.0972327	0.0132036	NoEnrichment	sp|Q68CZ2|TENS3_HUMAN
g26620	0.337753	0.253442	NoEnrichment	sp|O75366|AVIL_HUMAN
g26703	0.105168	0.0918764	NoEnrichment	NA
g26764	-0.520541	0.244537	NoEnrichment	NA
g26784	0.662945	-0.115513	NoEnrichment	sp|C9D7R3|VMPA3_LOXIN
g26787	0.0972509	-0.137071	NoEnrichment	NA
g26797	-0.0120163	-0.0926412	NoEnrichment	sp|Q03326|OXIR_STRAT
g26798	0.528112	-0.0259923	NoEnrichment	sp|P35320|OXIR_STRLI
g26799	0.261224	-0.0343579	NoEnrichment	sp|Q03326|OXIR_STRAT
g26809	0.266572	0.0740501	NoEnrichment	NA
g26840	1.20099	0.338951	Head	sp|Q566L4|ZN703_XENTR
g26848	0.290229	0.0632622	NoEnrichment	NA
g26858	0.351433	-0.0024788	NoEnrichment	sp|P42289|DRD1_XENLA
g2686	0.636231	0.0455849	NoEnrichment	sp|P35317|AT1A_HYDVU
g26877	0.142898	-0.11134	NoEnrichment	sp|Q9UBI9|HDC_HUMAN
g26884	-0.100157	-0.268939	NoEnrichment	sp|Q6DN14|MCTP1_HUMAN
g2689	-0.273269	0.0305741	NoEnrichment	sp|Q800K6|TOB1A_XENLA
g26936	0.02617	0.00231837	NoEnrichment	sp|P07207|NOTCH_DROME
g270	0.420092	-0.145687	NoEnrichment	sp|P86925|RLGM2_TRYB2
g2700	-0.04347	0.849115	NoEnrichment	sp|P35317|AT1A_HYDVU
g27008	0.73534	-0.051254	NoEnrichment	sp|Q9WV54|ASAH1_MOUSE
g27009	0.216732	0.0438738	NoEnrichment	sp|A3KQV2|BROX_DANRE
g27082	0.407168	0.52277	NoEnrichment	sp|Q80U40|RIMB2_MOUSE
g27138	-0.6673	0.227469	NoEnrichment	sp|O77775|NCF2_BOVIN
g27164	0.220449	0.160032	NoEnrichment	sp|P21333|FLNA_HUMAN
g27170	0.153794	0.0789158	NoEnrichment	sp|Q68EQ1|GMPPB_XENTR
g27171	0.158651	0.0564212	NoEnrichment	sp|Q7JZB4|GMPPB_DROME
g27236	0.409098	0.0579195	NoEnrichment	sp|P23950|TISB_MOUSE
g27266	-0.0547757	0.0591329	NoEnrichment	sp|Q96CX6|LRC58_HUMAN
g27312	-0.717751	0.00430252	NoEnrichment	NA
g27334	0.716227	1.20888	NoEnrichment	sp|Q04831|GLNA_PANAR
g27351	-0.104171	-0.00507436	NoEnrichment	sp|Q86A72|Y4781_DICDI
g27364	0.831377	0.130542	NoEnrichment	sp|P91943|PANG1_DROME
g2738	-0.00128456	-0.0155136	NoEnrichment	sp|Q6P5D8|SMHD1_MOUSE
g27455	0.218382	0.00435828	NoEnrichment	sp|P45723|PLC_STAAE
g27456	0.0620294	-0.130655	NoEnrichment	sp|Q18246|RAP1_CAEEL
g27534	0.314659	0.0451555	NoEnrichment	NA
g27596	-0.900663	-0.0943476	NoEnrichment	NA
g27612	0.351037	-0.0184917	NoEnrichment	sp|Q8WVB3|HEXDC_HUMAN
g2762	-0.111453	-0.000834556	NoEnrichment	NA
g27625	-0.281096	0.00491041	NoEnrichment	sp|Q8N9L1|ZIC4_HUMAN
g27641	-0.285356	0.0351962	NoEnrichment	sp|Q9D1F4|AKTS1_MOUSE
g27757	1.55211	-0.158326	NoEnrichment	NA
g27772	0.166829	0.0325962	NoEnrichment	sp|Q24040|BGB_DROME
g27778	1.27793	1.69776	Head	sp|Q03427|LAMC_DROME
g2784	-0.0581564	0.0101107	NoEnrichment	NA
g27852	0.0578707	0.0483376	NoEnrichment	sp|O75096|LRP4_HUMAN
g2790	1.17446	0.00105448	NoEnrichment	sp|O43422|P52K_HUMAN
g27920	0.221178	0.0306161	NoEnrichment	sp|Q9ESD1|PRSS8_MOUSE
g27959	-0.0137578	0.00745462	NoEnrichment	sp|Q63472|KCNH1_RAT
g28009	0.0334247	0.0400282	NoEnrichment	sp|Q9VCE9|UBS3A_DROME
g28042	-1.08867	0.159439	NoEnrichment	sp|Q67FQ3|ARHB_XENLA
g28055	1.04288	-0.0441025	NoEnrichment	NA
g2806	-0.234078	0.0108998	NoEnrichment	sp|P97739|ECE1_CAVPO
g28064	2.3691	0.793345	Head	sp|P17553|WNT3_MOUSE
g28068	-0.0755628	0.00220675	NoEnrichment	NA
g28083	0.110352	1.27117e-05	NoEnrichment	sp|Q6DN14|MCTP1_HUMAN
g2810	0.405088	-0.0269926	NoEnrichment	NA
g28117	-0.421215	0.651277	NoEnrichment	sp|A6NMZ7|CO6A6_HUMAN
g28136	0.188297	0.0114231	NoEnrichment	sp|Q9NQW6|ANLN_HUMAN
g28166	0.974032	-0.0474908	NoEnrichment	sp|Q8W257|PFI_PTIFI
g28168	-0.164666	0.01335	NoEnrichment	sp|E7FAM5|LIN41_DANRE
g28232	-0.0958814	-0.437927	NoEnrichment	NA
g28253	-0.0769679	0.107725	NoEnrichment	NA
g28262	-0.163865	0.869682	NoEnrichment	sp|P41221|WNT5A_HUMAN
g28273	0.899039	-0.00731736	NoEnrichment	NA
g2830	0.520509	0.215816	NoEnrichment	sp|P10090|WHITE_DROME
g28301	0.0634602	0.0374866	NoEnrichment	sp|P22897|MRC1_HUMAN
g28374	-0.199484	0.239608	NoEnrichment	NA
g28448	0.640717	0.115265	NoEnrichment	NA
g28449	-1.01017	-0.540491	NoEnrichment	sp|P32028|FD4_DROME
g28498	-0.212062	-0.00318364	NoEnrichment	sp|Q78KK3|S22AI_MOUSE
g28617	-0.154489	0.314548	NoEnrichment	sp|Q86SS6|SYT9_HUMAN
g2866	0.185786	0.0023201	NoEnrichment	NA
g28706	0.0770466	0.0168234	NoEnrichment	sp|Q8VDL4|ADPGK_MOUSE
g28716	1.31432	0.0794687	NoEnrichment	NA
g28717	1.66563	0.020104	NoEnrichment	NA
g28783	0.975874	-0.021962	NoEnrichment	NA
g28784	0.798299	-0.00615018	NoEnrichment	NA
g28785	1.09545	-0.104629	NoEnrichment	NA
g28786	0.0386441	0.27294	NoEnrichment	sp|P35285|RB22A_MOUSE
g28791	2.05242	0.013767	NoEnrichment	NA
g28800	0.0132886	0.00259672	NoEnrichment	sp|O60494|CUBN_HUMAN
g28828	0.0533323	-0.131064	NoEnrichment	sp|Q8WXR4|MYO3B_HUMAN
g28839	-0.509531	0.00568745	NoEnrichment	sp|Q8IY50|S35F3_HUMAN
g28899	-0.143725	0.202554	NoEnrichment	sp|Q13057|COASY_HUMAN
g28986	-0.175596	0.00101823	NoEnrichment	NA
g28992	0.478175	0.886705	NoEnrichment	sp|O76360|EGL4_CAEEL
g28994	-0.217312	-0.00166165	NoEnrichment	sp|P02469|LAMB1_MOUSE
g2903	0.0870808	0.108219	NoEnrichment	sp|Q6GMK0|MGT4B_DANRE
g29030	1.69001	0.210528	NoEnrichment	sp|P62775|MTPN_RAT
g29039	0.40224	0.0275375	NoEnrichment	sp|Q64701|RBL1_MOUSE
g2908	0.0451855	-0.000884462	NoEnrichment	sp|Q6PEH9|S39AA_DANRE
g29090	0.0696996	0.125489	NoEnrichment	NA
g29169	-0.3927	0.00162571	NoEnrichment	NA
g292	0.264009	0.0156165	NoEnrichment	NA
g29211	0.170176	-0.151167	NoEnrichment	sp|P50904|RASA1_RAT
g29234	-0.687117	0.116801	NoEnrichment	sp|Q28E95|SH3R1_XENTR
g29257	-0.25188	0.0624024	NoEnrichment	sp|Q8SQ72|SGCG_CANLF
g29262	0.220608	-0.00282404	NoEnrichment	sp|Q8WP23|BOLL_MACFA
g29266	0.335973	-0.304537	NoEnrichment	sp|P51830|ADCY9_MOUSE
g29308	0.827386	0.00214771	NoEnrichment	sp|Q4L235|ACSF4_HUMAN
g29309	0.458592	0.203351	NoEnrichment	sp|Q8TB61|S35B2_HUMAN
g29352	1.04783	0.0161812	NoEnrichment	NA
g29383	0.4932	0.170201	NoEnrichment	sp|Q7T3Q7|OPSO_RUTRU
g29412	-1.02902	0.107268	NoEnrichment	sp|P97739|ECE1_CAVPO
g2943	-0.189527	-0.131023	NoEnrichment	sp|Q62908|CSRP2_RAT
g2944	0.0251163	-0.0332599	NoEnrichment	sp|A2VDD2|TC1DB_XENLA
g29448	0.415579	0.458197	NoEnrichment	sp|Q24799|MYPH_ECHGR
g29454	0.122166	0.29971	NoEnrichment	sp|P72745|Y1101_SYNY3
g29473	-0.0493051	0.434894	NoEnrichment	sp|Q6XL41|RHCG_CHICK
g29481	0.307004	0.0657618	NoEnrichment	sp|Q8BTN6|LENG9_MOUSE
g29487	0.352488	0.28119	NoEnrichment	sp|A6QNS3|ABR_BOVIN
g29497	-0.355037	0.0528142	NoEnrichment	sp|Q68FD7|FNIP1_MOUSE
g29527	0.00117039	0.0484074	NoEnrichment	sp|Q8VE97|SRSF4_MOUSE
g2954	1.72757	-0.141547	NoEnrichment	sp|P32738|CLAT_RAT
g29540	-0.0617713	0.423353	NoEnrichment	sp|P07314|GGT1_RAT
g2955	-0.114733	-0.00141763	NoEnrichment	NA
g29567	0.558205	-0.213906	NoEnrichment	sp|Q9VUL9|FUCTA_DROME
g2959	-0.15036	0.00230949	NoEnrichment	NA
g29616	-0.0651644	0.00102553	NoEnrichment	sp|D3YXG0|HMCN1_MOUSE
g29750	3.64541	1.58866	NoEnrichment	sp|Q98SN7|WNT2B_CHICK
g29781	0.589733	-0.0112509	NoEnrichment	sp|Q05AS8|DVL2_XENTR
g29786	-0.171904	-0.112896	NoEnrichment	sp|Q8IXB1|DJC10_HUMAN
g29832	0.0382689	0.114618	NoEnrichment	sp|P68037|UB2L3_MOUSE
g29837	0.158245	-0.365066	NoEnrichment	NA
g2984	0.0934153	0.0242167	NoEnrichment	NA
g29966	0.406769	0.00718142	NoEnrichment	sp|P02269|H2A_ASTRU
g29976	0.316433	-0.315084	NoEnrichment	sp|Q8WWL2|SPIR2_HUMAN
g29986	0.160453	-0.000760031	NoEnrichment	sp|Q5T011|SZT2_HUMAN
g30081	0.0961245	0.00507125	NoEnrichment	sp|Q32MH5|F214A_HUMAN
g30174	-0.111254	0.00208328	NoEnrichment	sp|Q0EEE2|PTHD3_MOUSE
g30200	-0.0645457	-0.0105685	NoEnrichment	sp|P23978|SC6A1_RAT
g30219	0.146294	0.170671	NoEnrichment	sp|Q9PVY8|FXC2B_XENLA
g30222	0.0394867	-0.0574433	NoEnrichment	NA
g30252	0.920437	0.697963	Head	NA
g30307	0.293022	0.013977	NoEnrichment	NA
g30359	-0.0917837	0.000919783	NoEnrichment	sp|P29558|RBMS1_HUMAN
g30386	1.04918	0.184634	NoEnrichment	sp|Q28ET4|VENT1_XENTR
g30398	0.59579	0.340421	NoEnrichment	sp|P02510|CRYAB_BOVIN
g30406	-0.436896	0.128093	NoEnrichment	NA
g30409	1.48982	-0.0831664	NoEnrichment	sp|P48442|CASR_RAT
g30442	1.81611	0.492628	Head	NA
g30537	0.127217	-0.381977	NoEnrichment	sp|Q86YB8|ERO1B_HUMAN
g30573	1.3382	0.0885533	NoEnrichment	sp|A0KTG8|HLDE_SHESA
g30584	0.123487	-0.00548624	NoEnrichment	sp|Q3UVC0|KSR2_MOUSE
g30605	-0.305652	0.031633	NoEnrichment	sp|Q92179|CHST3_CHICK
g30630	0.0195127	-0.000398043	NoEnrichment	sp|P42674|BP10_PARLI
g30639	0.056826	0.0202348	NoEnrichment	sp|Q20191|NAS13_CAEEL
g30647	0.242225	-0.000740131	NoEnrichment	sp|P55115|NAS15_CAEEL
g30648	0.15267	-0.00810597	NoEnrichment	sp|P55112|NAS4_CAEEL
g30674	-0.841078	-1.37111	NoEnrichment	sp|B3STU3|CHAC1_RAT
g30700	0.330154	-0.0692351	NoEnrichment	sp|Q9BY84|DUS16_HUMAN
g30759	0.134279	-0.0214885	NoEnrichment	sp|Q9CQ52|CEL3B_MOUSE
g30762	-0.034257	0.0118684	NoEnrichment	sp|Q01085|TIAR_HUMAN
g30826	-0.363429	0.00870277	NoEnrichment	NA
g30865	0.800716	0.604226	NoEnrichment	sp|Q9VZZ4|PXDN_DROME
g30893	0.221025	0.208287	NoEnrichment	sp|Q9LMG7|PPA2_ARATH
g30894	-0.501351	-0.0448195	NoEnrichment	sp|Q86PM4|FGFR_HYDVU
g30938	-0.0123821	-0.0235909	NoEnrichment	sp|Q9UJT9|FBXL7_HUMAN
g30956	-0.242604	-0.00727509	NoEnrichment	sp|E7FAM5|LIN41_DANRE
g3099	-0.149316	0.000775875	NoEnrichment	sp|Q9QYS2|GRM3_MOUSE
g31005	0.0481961	0.23384	NoEnrichment	NA
g31060	-0.0622602	0.00663144	NoEnrichment	sp|Q8NCL4|GALT6_HUMAN
g31061	0.0471734	-0.0298397	NoEnrichment	sp|Q6WV17|GALT5_DROME
g31085	-0.0781795	0.00145008	NoEnrichment	NA
g31086	-0.00847076	0.00399193	NoEnrichment	NA
g31098	0.0997162	-0.0614243	NoEnrichment	sp|P97858|S35B1_MOUSE
g3121	0.0674528	0.141231	NoEnrichment	sp|Q3ZBG9|PLS2_BOVIN
g31252	-0.181155	-0.0105231	NoEnrichment	sp|Q27312|NADA_APLKU
g31283	0.423698	-0.103948	NoEnrichment	sp|Q9BT88|SYT11_HUMAN
g31352	-0.153994	-0.218926	NoEnrichment	sp|Q9Z0J1|RECK_MOUSE
g31440	-0.898173	-0.0543301	NoEnrichment	sp|P25931|NPYR_DROME
g31502	-0.0440936	-0.742029	NoEnrichment	NA
g31631	0.501753	0.16028	NoEnrichment	sp|Q9BRS8|LARP6_HUMAN
g31632	-0.129414	0.258607	NoEnrichment	sp|Q8AVU4|HES1B_XENLA
g31719	-0.408693	1.32692	NoEnrichment	NA
g31723	-0.0821888	-0.196235	NoEnrichment	sp|P43307|SSRA_HUMAN
g31735	0.00949818	-0.0660291	NoEnrichment	sp|O57321|EAA1_AMBTI
g31801	0.013922	0.00705494	NoEnrichment	sp|Q9I8D1|MYO6_CHICK
g31900	-0.18809	0.0109017	NoEnrichment	sp|P23327|SRCH_HUMAN
g32018	0.101101	0.0500514	NoEnrichment	sp|Q24547|STX1A_DROME
g32151	0.292859	0.0396639	NoEnrichment	sp|Q8K157|GALM_MOUSE
g32158	0.602563	-1.201	NoEnrichment	sp|P51399|LOX5_MESAU
g32199	-0.0406632	-0.0114248	NoEnrichment	sp|P06865|HEXA_HUMAN
g3220	-0.0317101	0.034699	NoEnrichment	sp|Q9TWL9|COMA_CONMA
g32238	-0.587956	-0.247008	NoEnrichment	NA
g32263	0.144102	0.0350501	NoEnrichment	sp|Q9XTL9|PYG_DROME
g32290	-0.0330396	0.0281105	NoEnrichment	sp|Q96PN7|TREF1_HUMAN
g32331	0.467348	0.0175191	NoEnrichment	sp|Q3SZN3|OMA1_BOVIN
g32332	-0.316554	-0.00439037	NoEnrichment	sp|A1L1V4|LOL2B_DANRE
g32336	0.908792	0.00702564	NoEnrichment	sp|Q9H5L6|THAP9_HUMAN
g32459	0.513456	-0.000432923	NoEnrichment	NA
g32552	0.388969	0.307145	NoEnrichment	sp|Q1LYG0|SPD2A_DANRE
g32559	-0.74112	0.295195	NoEnrichment	NA
g32592	-0.19497	-0.0145906	NoEnrichment	sp|O02228|SC5A7_CAEEL
g32625	-0.0606104	0.0125311	NoEnrichment	sp|Q539E5|APX1_HYDVD
g32753	0.269907	-0.0424557	NoEnrichment	NA
g32789	-0.0183857	0.00882861	NoEnrichment	sp|Q2PZL6|FAT4_MOUSE
g32882	-0.122046	-0.030681	NoEnrichment	sp|O00222|GRM8_HUMAN
g32887	-0.23373	0.0627612	NoEnrichment	NA
g32919	-0.488006	-0.00637304	NoEnrichment	NA
g32935	0.0125315	-0.00403439	NoEnrichment	sp|Q80ZF8|AGRB3_MOUSE
g32982	-0.0618249	-0.12488	NoEnrichment	sp|Q5R6T1|PDIA6_PONAB
g32988	-0.112841	-0.00677032	NoEnrichment	sp|Q9VQX4|PNCB_DROME
g33141	0.450567	0.00896972	NoEnrichment	sp|Q9LHQ6|OCT4_ARATH
g33146	0.207719	0.0477616	NoEnrichment	sp|O75751|S22A3_HUMAN
g33185	-0.0944137	0.00856512	NoEnrichment	sp|Q7Z442|PK1L2_HUMAN
g33186	0.598009	0.00258615	NoEnrichment	sp|H2LRU7|PKD2_ORYLA
g33240	-0.0229582	-0.0164896	NoEnrichment	NA
g33251	0.721554	0.163491	NoEnrichment	sp|Q9ZNS4|PRB1_ARATH
g33271	-0.370963	0.506914	NoEnrichment	NA
g33275	0.14894	-0.000485233	NoEnrichment	sp|Q8VCK5|KLH20_MOUSE
g33278	-0.0130267	-0.00839223	NoEnrichment	sp|Q6PHE8|CC124_DANRE
g33324	0.445755	-0.0916943	NoEnrichment	NA
g3337	0.119444	0.0152322	NoEnrichment	sp|Q8NFA0|UBP32_HUMAN
g33373	7.83676	0.965675	Head	sp|P56706|WNT7B_HUMAN
g33396	0.109266	-0.243619	NoEnrichment	sp|Q28EM7|OTX5_XENTR
g33422	3.202	0.51786	Head	sp|Q62445|SP4_MOUSE
g33450	-0.373629	0.00204694	NoEnrichment	sp|A6QNK1|G3ST1_BOVIN
g33457	-0.113897	-0.190689	NoEnrichment	NA
g33477	-0.0246955	-0.41693	NoEnrichment	sp|Q24799|MYPH_ECHGR
g33493	0.0415761	-0.00843737	NoEnrichment	sp|B3LYS5|FOXO_DROAN
g33496	0.0039836	-0.198934	NoEnrichment	sp|Q9QX47|SON_MOUSE
g33497	-0.0848645	-0.305245	NoEnrichment	sp|Q01149|CO1A2_MOUSE
g33581	0.934997	-0.0178746	NoEnrichment	NA
g33605	0.184132	-0.00711804	NoEnrichment	sp|Q9VAS7|INX3_DROME
g33606	-0.376518	6.55473e-05	NoEnrichment	sp|Q9VAS7|INX3_DROME
g33633	-0.178295	-0.00612116	NoEnrichment	NA
g33643	0.277828	0.0939504	NoEnrichment	NA
g33656	-0.0462966	0.0452091	NoEnrichment	sp|Q553X7|GALE_DICDI
g33661	0.961984	-0.730129	NoEnrichment	sp|Q5R733|CPEB1_PONAB
g33686	-0.152534	0.166577	NoEnrichment	NA
g33693	-0.253944	0.188331	NoEnrichment	sp|P18428|LBP_HUMAN
g33728	0.282133	0.0469874	NoEnrichment	sp|Q01433|AMPD2_HUMAN
g33739	-0.069304	-0.00518803	NoEnrichment	sp|Q8BQM9|MD12L_MOUSE
g33749	0.00424779	-0.228911	NoEnrichment	sp|G5EGQ6|TEN1_CAEEL
g33757	0.061307	0.247246	NoEnrichment	NA
g33803	-1.06935	0.000680199	NoEnrichment	NA
g3411	-0.294645	0.00760189	NoEnrichment	NA
g3419	0.13531	-0.151517	NoEnrichment	sp|Q9VAI0|GNA1_DROME
g3460	-0.236525	0.0012468	NoEnrichment	sp|P55112|NAS4_CAEEL
g3553	0.706477	0.769453	Head	sp|A0LMC1|PHNX_SYNFM
g3650	0.649487	0.00661012	NoEnrichment	sp|Q8BGD4|SO4C1_MOUSE
g3660	0.818502	-1.81888	NoEnrichment	NA
g370	-0.118792	0.00239236	NoEnrichment	sp|Q68US5|EVA1C_PANTR
g3709	0.156428	-2.60536	NoEnrichment	NA
g3710	0.545056	-1.31505	NoEnrichment	sp|P38977|ANTA_HYDVU
g3756	-0.102053	0.0771362	NoEnrichment	sp|Q5RDQ3|AMERL_PONAB
g3847	-0.992512	0.64451	NoEnrichment	sp|A4QNP7|DMTA2_XENTR
g3893	0.46921	-0.543172	NoEnrichment	sp|Q8GXG1|ASPGB_ARATH
g3899	0.0621096	0.132915	NoEnrichment	sp|Q16629|SRSF7_HUMAN
g3966	-0.0652814	0.0303138	NoEnrichment	sp|Q38SD2|LRRK1_HUMAN
g3974	0.27106	0.0390482	NoEnrichment	sp|Q6S5C2|GNPTG_MOUSE
g3976	-0.0252638	-0.278538	NoEnrichment	NA
g4000	-0.428845	0.142687	NoEnrichment	sp|Q6CA53|APT_YARLI
g4003	0.152428	-0.597505	NoEnrichment	sp|Q63475|PTPR2_RAT
g4015	-0.480403	0.466354	NoEnrichment	NA
g4024	1.3051	0.00925473	NoEnrichment	NA
g4061	-0.214598	0.252064	NoEnrichment	sp|P47032|PRY1_YEAST
g4174	0.345768	0.0738447	NoEnrichment	sp|Q5F4B2|SWP70_CHICK
g4303	-0.0771647	0.25086	NoEnrichment	sp|Q5VV41|ARHGG_HUMAN
g4304	0.0321985	0.0934092	NoEnrichment	sp|Q04771|ACVR1_HUMAN
g4318	0.0913603	-0.0189455	NoEnrichment	NA
g4323	0.971427	-0.285549	NoEnrichment	NA
g4324	1.1986	-0.107891	NoEnrichment	sp|P22274|ARF_CANAL
g433	-0.137356	-0.516435	NoEnrichment	sp|Q9WV48|SHAN1_RAT
g4386	-0.293794	0.0341905	NoEnrichment	NA
g4389	0.613227	0.00531375	NoEnrichment	sp|B3EWZ3|CADN_ACRMI
g44	-0.146753	0.277091	NoEnrichment	sp|Q86WA9|S2611_HUMAN
g4402	0.903587	0.00236131	NoEnrichment	sp|B3EWZ3|CADN_ACRMI
g4403	0.48986	-0.00738698	NoEnrichment	sp|B3EWZ3|CADN_ACRMI
g4409	-0.355939	-0.161205	NoEnrichment	sp|P9WKB9|Y1760_MYCTU
g4469	2.74073	0.00240216	NoEnrichment	NA
g4475	0.0933831	0.503498	NoEnrichment	NA
g4537	0.0434651	0.00309365	NoEnrichment	sp|P20585|MSH3_HUMAN
g4584	-0.123492	0.679538	NoEnrichment	NA
g46	0.136141	0.0464229	NoEnrichment	sp|Q86WA9|S2611_HUMAN
g4679	-0.365234	0.159346	NoEnrichment	sp|Q7U6F4|RIMK_SYNPX
g4713	0.394199	-0.0961109	NoEnrichment	sp|Q9ULH7|MKL2_HUMAN
g4715	1.2597	-0.337425	NoEnrichment	NA
g4765	-0.10496	-0.00627264	NoEnrichment	sp|P50430|ARSB_RAT
g4769	-0.157145	0.251393	NoEnrichment	sp|Q5M8U1|ELOV5_XENTR
g478	-0.083418	-0.215914	NoEnrichment	NA
g4815	0.453131	0.0519259	NoEnrichment	sp|Q9VW26|OAT_DROME
g4856	-0.154505	0.0750052	NoEnrichment	sp|Q9ESM0|IP6K1_RAT
g4917	-1.21194	-0.942749	NoEnrichment	sp|P25723|TLD_DROME
g4921	-0.134379	0.0199564	NoEnrichment	NA
g4922	0.185485	0.30886	NoEnrichment	sp|D3ZHV2|MACF1_RAT
g5003	0.26092	0.00839238	NoEnrichment	sp|Q9H4G4|GAPR1_HUMAN
g5035	-0.196559	0.0164832	NoEnrichment	NA
g5051	0.0735923	-0.109275	NoEnrichment	sp|Q5RJW5|IRS2B_XENLA
g507	0.0569038	-0.0514155	NoEnrichment	sp|P48430|SOX2_CHICK
g5112	0.0305381	-0.010697	NoEnrichment	sp|A0A0R4IBK5|R213A_DANRE
g5130	-0.0402684	0.0192551	NoEnrichment	sp|Q8TB72|PUM2_HUMAN
g5147	1.47525	0.194972	Head	NA
g5180	-0.0705741	0.194262	NoEnrichment	NA
g5217	0.0558849	-0.000588007	NoEnrichment	NA
g5218	0.181363	0.069547	NoEnrichment	sp|Q9TWL9|COMA_CONMA
g5403	0.663824	0.0097251	NoEnrichment	sp|Q76KP1|B4GN4_HUMAN
g5410	0.770497	0.108068	NoEnrichment	NA
g5411	2.3687	-0.38103	NoEnrichment	NA
g5455	1.18098	-0.484995	NoEnrichment	NA
g5459	-0.469361	-0.00639088	NoEnrichment	NA
g5466	-0.109047	-0.0118737	NoEnrichment	sp|Q9GNN8|CTXA_CARAL
g5483	-0.120099	-0.000116031	NoEnrichment	sp|Q9GNN8|CTXA_CARAL
g5525	0.364889	0.0493017	NoEnrichment	sp|P11308|ERG_HUMAN
g5530	-0.0432944	-0.123222	NoEnrichment	sp|Q27968|DNJC3_BOVIN
g5621	1.37469	0.059734	NoEnrichment	sp|Q9W751|PITX1_XENLA
g564	-0.695032	0.0305821	NoEnrichment	sp|Q35101|COX1_METSE
g5660	-0.354551	-0.00240857	NoEnrichment	sp|A8TX70|CO6A5_HUMAN
g5731	0.126612	0.0531622	NoEnrichment	sp|E1BE02|E2F7_BOVIN
g5735	-0.930719	0.434394	NoEnrichment	sp|O54834|RHG06_MOUSE
g5757	0.0181294	0.0318515	NoEnrichment	sp|P32794|AFG2_YEAST
g5758	0.200661	-0.00598645	NoEnrichment	NA
g5880	-0.159164	0.00469191	NoEnrichment	NA
g5882	0.582678	-0.562714	NoEnrichment	sp|Q9PVW8|SAL_SILAS
g5883	0.106022	-0.0265654	NoEnrichment	sp|Q9PVW8|SAL_SILAS
g5947	0.246407	0.0902199	NoEnrichment	sp|Q626N3|TM151_CAEBR
g595	-0.0874416	-0.265814	NoEnrichment	sp|Q9BGI2|PRDX4_BOVIN
g5988	0.0738647	0.120484	NoEnrichment	sp|P75820|AMID_ECOLI
g5995	0.490302	0.181992	NoEnrichment	sp|O08605|MKNK1_MOUSE
g604	-0.131974	-0.00528596	NoEnrichment	NA
g6067	0.525988	-1.09993	NoEnrichment	NA
g6131	1.1692	-0.957656	NoEnrichment	sp|O73853|CP17A_ICTPU
g6164	0.550538	0.00639463	NoEnrichment	sp|Q9UHC6|CNTP2_HUMAN
g6167	-0.266276	0.456808	NoEnrichment	sp|Q8BH04|PCKGM_MOUSE
g6182	1.10969	0.00863208	NoEnrichment	NA
g6256	0.936703	-0.195964	NoEnrichment	NA
g6282	0.018034	0.834813	NoEnrichment	NA
g6320	0.193258	0.370392	NoEnrichment	sp|P35317|AT1A_HYDVU
g6351	-0.0775791	0.0258089	NoEnrichment	sp|Q9P2E2|KIF17_HUMAN
g637	-0.264351	0.00183313	NoEnrichment	sp|Q54LN4|GGHA_DICDI
g6387	0.157064	-0.011517	NoEnrichment	sp|P08183|MDR1_HUMAN
g6403	0.620069	0.130636	NoEnrichment	NA
g6418	0.800728	0.703274	Head	sp|Q05187|TGMH_TACTR
g6466	-0.129778	0.137906	NoEnrichment	sp|A6QNS3|ABR_BOVIN
g6623	-0.361112	-0.00410275	NoEnrichment	sp|Q32KJ8|ARSI_RAT
g6624	-0.245788	-0.00476351	NoEnrichment	NA
g6652	0.0594065	0.161247	NoEnrichment	sp|O14672|ADA10_HUMAN
g6653	0.0884369	0.11723	NoEnrichment	sp|Q10741|ADA10_BOVIN
g6659	0.562504	0.00354631	NoEnrichment	sp|Q8HXX6|SAP3_MACFA
g6732	0.317853	0.0409907	NoEnrichment	sp|Q54KA7|SECG_DICDI
g6779	2.04319	-0.0337694	NoEnrichment	NA
g6850	-0.151289	0.0427985	NoEnrichment	sp|G8HTB6|ZPP_ACRMI
g69	0.243909	-0.00416915	NoEnrichment	sp|O57460|TLL1_DANRE
g6940	-0.184058	0.108112	NoEnrichment	sp|A6QPT7|ERAP2_BOVIN
g6980	-0.13322	-0.00259563	NoEnrichment	NA
g7086	0.139023	-0.190361	NoEnrichment	sp|P98198|AT8B2_HUMAN
g710	0.445775	-0.299609	NoEnrichment	sp|Q9NBX4|RTXE_DROME
g7113	0.0314462	0.00430277	NoEnrichment	sp|Q9P267|MBD5_HUMAN
g7119	0.757661	0.251641	NoEnrichment	sp|O60239|3BP5_HUMAN
g712	0.438645	-0.580101	NoEnrichment	NA
g7128	0.47359	0.00618336	NoEnrichment	sp|Q6PF45|VIAAT_XENLA
g7129	-1.28319	0.131527	NoEnrichment	sp|Q6PF45|VIAAT_XENLA
g7149	-0.111133	0.00125305	NoEnrichment	sp|A1DWM3|MFSD6_PIG
g7203	0.586366	0.0729382	NoEnrichment	sp|C5G6D7|CABC2_BACT4
g7255	0.200996	0.0672113	NoEnrichment	sp|Q9W0Y8|SCN60_DROME
g726	0.492809	-0.752349	NoEnrichment	NA
g7262	0.0958699	0.167388	NoEnrichment	sp|P35224|CTNB_URECA
g7264	0.294192	0.0186865	NoEnrichment	sp|Q0VFM6|GMPPA_XENTR
g7319	0.873497	0.0571049	NoEnrichment	sp|P41594|GRM5_HUMAN
g7356	0.16899	0.237102	NoEnrichment	sp|D3ZEN0|MILK2_RAT
g7398	0.0968169	0.106353	NoEnrichment	sp|Q27128|PAPSS_URECA
g7427	-0.334061	-0.000872976	NoEnrichment	NA
g7502	0.397935	0.0689124	NoEnrichment	sp|Q95L74|CY24B_BISBI
g7524	0.052344	0.165766	NoEnrichment	sp|Q6ZMG9|CERS6_HUMAN
g7633	0.302656	-0.039855	NoEnrichment	sp|Q5SX19|PIGL_MOUSE
g7648	0.0272549	0.258491	NoEnrichment	NA
g7652	0.331578	-0.0585668	NoEnrichment	sp|Q52KG5|KI26A_MOUSE
g7675	0.0217289	-0.0499888	NoEnrichment	sp|P42128|FOXK1_MOUSE
g7738	0.330266	-1.11514	NoEnrichment	NA
g7775	0.221956	0.00840394	NoEnrichment	sp|O02703|BAX_BOVIN
g7832	0.115956	0.00948987	NoEnrichment	sp|O95267|GRP1_HUMAN
g7838	0.311838	0.24036	NoEnrichment	NA
g7871	-0.313584	-0.496889	NoEnrichment	NA
g7896	-0.346637	0.0274025	NoEnrichment	NA
g79	0.123101	0.569913	NoEnrichment	sp|Q9C0F3|ZN436_HUMAN
g7964	0.34455	-0.0585115	NoEnrichment	sp|Q03717|KCNB1_MOUSE
g7977	0.329526	0.545326	NoEnrichment	sp|Q9R0S2|MMP24_MOUSE
g7978	0.426265	-0.0126661	NoEnrichment	sp|O77592|S35A3_CANLF
g8004	-0.068022	-0.0417785	NoEnrichment	sp|Q8H0T9|KTNB1_ARATH
g8051	0.968684	0.00346828	NoEnrichment	sp|Q58DD2|S2611_BOVIN
g8165	-0.168802	0.00398207	NoEnrichment	sp|P10079|FBP1_STRPU
g8427	0.358917	-0.0346817	NoEnrichment	sp|Q8JI28|TLL1_XENLA
g8465	-0.114499	0.0028104	NoEnrichment	NA
g8497	-0.185093	0.190944	NoEnrichment	sp|O42350|CO1A2_LITCT
g856	0.269511	0.0599029	NoEnrichment	sp|Q503V9|ENDUB_DANRE
g8591	0.205903	0.0105119	NoEnrichment	sp|Q14AT5|ANO7_MOUSE
g8603	0.453582	-0.0590611	NoEnrichment	sp|Q6ZR37|PKHG7_HUMAN
g8621	-0.117393	0.0215204	NoEnrichment	sp|P0CB38|PAB4L_HUMAN
g8661	0.162585	0.0201254	NoEnrichment	sp|Q9P2J8|ZN624_HUMAN
g8682	-0.318677	-0.00204311	NoEnrichment	NA
g8688	-0.0278636	0.0461456	NoEnrichment	NA
g8690	0.0245753	0.0130136	NoEnrichment	sp|Q7TQK0|CCNT2_MOUSE
g87	-0.193809	0.602216	NoEnrichment	sp|Q4KMC4|GFPT2_RAT
g8735	-0.238302	0.00155735	NoEnrichment	sp|Q7Z442|PK1L2_HUMAN
g8745	-0.905253	-0.0098421	NoEnrichment	NA
g8764	-0.0950992	0.0111965	NoEnrichment	NA
g8768	0.00131755	0.443008	NoEnrichment	sp|Q1KKZ3|HXA9B_TAKRU
g8784	-0.367397	0.147532	NoEnrichment	sp|A1L1W9|MOT10_DANRE
g8798	-0.0344693	-0.00881395	NoEnrichment	sp|Q7Z2Y8|GVIN1_HUMAN
g8864	0.0177224	-0.0474979	NoEnrichment	sp|P31948|STIP1_HUMAN
g8909	-0.667915	-0.0319169	NoEnrichment	NA
g8917	1.73803	-0.0025883	NoEnrichment	sp|P48800|FGF2_CHICK
g8942	0.45641	0.0434374	NoEnrichment	sp|O94844|RHBT1_HUMAN
g8947	0.249639	0.0543159	NoEnrichment	sp|Q5ZKX1|CHM1B_CHICK
g8968	0.179521	-0.125835	NoEnrichment	sp|P55112|NAS4_CAEEL
g8972	-0.0935187	-0.0725571	NoEnrichment	sp|Q99KF1|TMED9_MOUSE
g8976	-0.373713	0.0399342	NoEnrichment	NA
g9001	-0.150277	0.00207997	NoEnrichment	sp|Q9H7F0|AT133_HUMAN
g9063	-0.923526	-0.0811457	NoEnrichment	sp|Q9UPI3|FLVC2_HUMAN
g9117	0.548252	0.252441	NoEnrichment	NA
g9118	-1.1038	-0.192343	NoEnrichment	NA
g9166	-0.0678627	0.108619	NoEnrichment	sp|Q8UWA5|CAH2_TRIHK
g9169	0.864815	0.0178317	NoEnrichment	sp|Q8UWA5|CAH2_TRIHK
g9184	1.11131	-0.0385838	NoEnrichment	sp|P81900|KAPR2_DROME
g9204	0.0746364	-0.00852799	NoEnrichment	sp|B3TP03|CTR2_CHICK
g9227	0.14796	-0.0516087	NoEnrichment	sp|Q6GME2|CK054_XENLA
g9365	0.0301859	0.0490972	NoEnrichment	sp|Q9R0S2|MMP24_MOUSE
g947	0.0934131	-0.00665305	NoEnrichment	sp|P61150|FGF12_RAT
g9527	0.218319	0.113801	NoEnrichment	sp|A6H742|PLSI_BOVIN
g9565	0.443375	-2.17284	NoEnrichment	sp|Q27746|DNMT1_PARLI
g9572	-0.403954	-0.0064649	NoEnrichment	sp|P26436|ASPX_HUMAN
g9693	0.890131	0.198834	NoEnrichment	sp|P18503|CAS4_EPHMU
g9795	-0.0696462	0.0828089	NoEnrichment	NA
g9857	0.402305	-0.0474312	NoEnrichment	sp|P39795|TREC_BACSU
g9994	2.92712	0.517638	Head	sp|Q2W2L2|RS11_MAGSA

## Sheet: Fig. 2D
Peak ID	Gene ID	Regen LogFC	SC LogFC	Structure Enrichment	Swissprot Annotation
10	g5778	-0.210273	0	NoEnrichment	NA
100022	g31460	0.021897	0.0223793	NoEnrichment	sp|Q7Z494|NPHP3_HUMAN
100034	g31462	0.522037	0.465459	NoEnrichment	sp|P17126|ACT_HYDVU
100039	g31462	0.299811	0.465459	NoEnrichment	sp|P17126|ACT_HYDVU
100080	g31119	0.00277492	0	NoEnrichment	sp|Q9H5L6|THAP9_HUMAN
10010	NA	-0.00883934	0	NoEnrichment	NA
100120	g20029	-0.0366032	0	NoEnrichment	NA
10013	NA	0.168483	0	NoEnrichment	NA
100139	g27211	-0.386993	0.291284	NoEnrichment	sp|Q14161|GIT2_HUMAN
100141	g27211	0.269093	0.291284	NoEnrichment	sp|Q14161|GIT2_HUMAN
100150	g27217	0.296783	0	NoEnrichment	sp|Q7JQ07|MOS1T_DROMA
100154	g27218	0.584826	-0.00195782	NoEnrichment	sp|P98154|IDD_MOUSE
100155	g27218	-0.0607273	-0.00195782	NoEnrichment	sp|P98154|IDD_MOUSE
100163	g27218	0.471632	-0.00195782	NoEnrichment	sp|P98154|IDD_MOUSE
100175	g27219	-0.598271	0.244787	NoEnrichment	sp|P53814|SMTN_HUMAN
100176	g27219	-0.918592	0.244787	NoEnrichment	sp|P53814|SMTN_HUMAN
100179	g27219	-0.219856	0.244787	NoEnrichment	sp|P53814|SMTN_HUMAN
100180	g27219	-0.482771	0.244787	NoEnrichment	sp|P53814|SMTN_HUMAN
100184	g27219	-0.386633	0.244787	NoEnrichment	sp|P53814|SMTN_HUMAN
100202	g27221	1.88755	0	NoEnrichment	NA
100203	g27221	1.40127	0	NoEnrichment	NA
100206	g27223	2.65186	0	NoEnrichment	NA
100214	g27225	1.37138	0	NoEnrichment	NA
100217	g27225	0.689079	0	NoEnrichment	NA
100220	g16419	0.0647474	0	NoEnrichment	NA
100221	g16419	0.301476	0	NoEnrichment	NA
100236	g16499	-0.450901	0	NoEnrichment	NA
100260	g16503	0.288268	0	NoEnrichment	sp|P56696|KCNQ4_HUMAN
100270	g16505	-0.243594	0	NoEnrichment	NA
100295	g16528	-0.779364	0	NoEnrichment	NA
100319	g16538	0.153514	0.0154644	NoEnrichment	sp|Q28GD9|RNH2B_XENTR
10032	g2839	0.928895	0	NoEnrichment	NA
10033	g2839	-0.0285526	0	NoEnrichment	NA
100330	g16538	0.819844	0.0154644	NoEnrichment	sp|Q28GD9|RNH2B_XENTR
10036	g2839	-0.0241902	0	NoEnrichment	NA
100364	g16544	-0.304668	0.0465094	NoEnrichment	sp|A6QQ21|CSN6_BOVIN
100368	g16544	0.304954	0.0465094	NoEnrichment	sp|A6QQ21|CSN6_BOVIN
100369	g16544	1.13851	0.0465094	NoEnrichment	sp|A6QQ21|CSN6_BOVIN
100377	g16546	0.415904	0.0323074	NoEnrichment	sp|E7F5E1|CE162_DANRE
100381	g16546	0.0355811	0.0323074	NoEnrichment	sp|E7F5E1|CE162_DANRE
100412	g16556	-0.214754	0	NoEnrichment	NA
100419	g16557	-1.3104	-0.0122276	NoEnrichment	sp|Q09604|VAB15_CAEEL
100421	g16557	-1.68243	-0.0122276	NoEnrichment	sp|Q09604|VAB15_CAEEL
100422	g16557	-1.10914	-0.0122276	NoEnrichment	sp|Q09604|VAB15_CAEEL
100464	g5275	-0.257658	0.0193838	NoEnrichment	sp|A6H8H5|KCNB2_MOUSE
100479	g5283	0.0849116	0	NoEnrichment	sp|O60344|ECE2_HUMAN
100487	g5289	0.155775	-0.127368	NoEnrichment	sp|Q7ZUW2|HYOU1_DANRE
100500	g20013	-0.751411	0	NoEnrichment	NA
100540	g32050	0.313116	0	NoEnrichment	NA
10055	g2849	0.279135	0	NoEnrichment	NA
100575	g17136	0.489822	0.0524987	NoEnrichment	sp|P56696|KCNQ4_HUMAN
100577	g17136	1.62073	0.0524987	NoEnrichment	sp|P56696|KCNQ4_HUMAN
100581	g17138	0.196345	0	NoEnrichment	NA
100588	g17139	-0.252881	0.0368505	NoEnrichment	sp|Q90610|NEO1_CHICK
100589	g17139	0.698899	0.0368505	NoEnrichment	sp|Q90610|NEO1_CHICK
100601	g17143	0.669144	0	NoEnrichment	NA
100605	g17144	0.424618	0.0684907	NoEnrichment	sp|Q9R0Y1|ASIC5_MOUSE
100610	g17146	1.14684	0	NoEnrichment	sp|Q7JQ07|MOS1T_DROMA
10063	g2851	-0.111219	-0.0118187	NoEnrichment	sp|Q24509|STX5_DROME
100630	g17150	0.527584	0	NoEnrichment	sp|Q02006|Y4233_RHOPA
100647	g17152	-0.289669	-0.0351087	NoEnrichment	sp|P19204|CASQ2_CHICK
100655	g17154	-0.359975	0.163566	NoEnrichment	sp|Q9EPB1|DPP2_RAT
100669	g17156	-0.320218	0	NoEnrichment	NA
10071	g2855	-0.0927163	0	NoEnrichment	NA
100720	g6483	-0.246793	0	NoEnrichment	NA
100747	g6494	0.00216148	-0.0228931	NoEnrichment	sp|Q99MU0|DBF4A_CRIGR
100749	g6495	-0.273977	-0.0245722	NoEnrichment	sp|Q5RC56|NDKA_PONAB
100804	g6527	-0.046538	0.0127438	NoEnrichment	sp|Q8TCB7|METL6_HUMAN
10082	g17518	-0.863283	0	NoEnrichment	NA
10083	g17518	-2.30174	0	NoEnrichment	NA
100835	g6538	0.711646	0	NoEnrichment	NA
100836	g6538	0.600682	0	NoEnrichment	NA
100837	g6538	0.396892	0	NoEnrichment	NA
10084	g17518	-0.270201	0	NoEnrichment	NA
100844	g6538	0.997125	0	NoEnrichment	NA
100872	g6549	-0.125214	0.247119	NoEnrichment	sp|Q9CYL5|GAPR1_MOUSE
100879	g6550	0.644953	0	NoEnrichment	NA
100889	g6554	-0.329473	0	NoEnrichment	NA
10090	g17518	-0.0434225	0	NoEnrichment	NA
10091	NA	-0.0699022	0	NoEnrichment	NA
100915	g6562	0.592933	0	NoEnrichment	NA
100944	g6567	0.530538	-1.13865	NoEnrichment	sp|Q6UE39|GLT13_RAT
100966	g735	0.665754	0	NoEnrichment	NA
100986	g1652	0.913429	0	NoEnrichment	NA
100987	g1652	0.837165	0	NoEnrichment	NA
100995	g1654	0.116649	0	NoEnrichment	NA
101001	g1655	-0.0879772	0.0221592	NoEnrichment	sp|Q9D531|NXNL2_MOUSE
101008	g1659	-0.415789	0	NoEnrichment	NA
101038	g1671	0.200105	0	NoEnrichment	NA
10104	g1086	0.491489	0.00751249	NoEnrichment	sp|Q640L5|CCD18_MOUSE
101043	g1672	0.393998	-0.00165418	NoEnrichment	sp|Q8IFN0|YD115_PLAF7
101075	g15580	-0.163447	0	NoEnrichment	NA
101080	g12824	0.209397	0	NoEnrichment	sp|Q80TC5|POGK_MOUSE
101081	g12826	0.246899	0	NoEnrichment	NA
101082	g12829	0.0213659	0	NoEnrichment	NA
101085	g12831	0.213251	0	NoEnrichment	NA
101086	g12831	0.088194	0	NoEnrichment	NA
101133	g9136	0.240245	-0.000502732	NoEnrichment	sp|Q5HZE0|MCATL_RAT
101138	g9138	0.525399	0.0266431	NoEnrichment	sp|Q9QXA6|BAT1_MOUSE
101178	g7184	-0.160877	0	NoEnrichment	NA
101187	g31949	0.04741	0	NoEnrichment	NA
101189	g31949	-0.866646	0	NoEnrichment	NA
101190	g31949	0.901449	0	NoEnrichment	NA
101192	g31949	-0.0261676	0	NoEnrichment	NA
101199	g31950	-0.950919	0	NoEnrichment	NA
101215	g31953	-0.255748	0	NoEnrichment	NA
101218	g31953	-2.26833	0	NoEnrichment	NA
101221	g31954	-0.627179	-0.0669947	NoEnrichment	sp|P42583|NKX25_XENLA
101230	g31954	-0.854446	-0.0669947	Foot	sp|P42583|NKX25_XENLA
10124	g1092	-1.10369	0	NoEnrichment	NA
101246	g31958	2.47793	0	NoEnrichment	NA
101248	g31959	1.12915	0	NoEnrichment	NA
101249	g31959	2.35256	0	NoEnrichment	NA
101253	g31959	1.081	0	NoEnrichment	NA
101292	g9490	-0.00916348	0	NoEnrichment	NA
101300	g9491	0.274177	0	NoEnrichment	NA
101359	g29507	0.272405	0.0612619	NoEnrichment	sp|Q0IJ05|OSBL9_XENTR
101371	g29508	0.128803	0	NoEnrichment	NA
101374	g29508	0.419681	0	NoEnrichment	NA
101386	g29510	-0.0250925	-0.000209822	NoEnrichment	sp|Q5ZHY5|CHIP_CHICK
101423	g29526	-0.00544194	0	NoEnrichment	NA
101433	g29533	0.338957	0	NoEnrichment	NA
101466	g7439	-0.546544	0.0476478	NoEnrichment	sp|Q6PC91|BT3L4_DANRE
101479	g7441	-0.10891	0	NoEnrichment	NA
101498	g33690	1.9922	0	NoEnrichment	sp|P21328|RTJK_DROME
101499	g33690	1.50927	0	NoEnrichment	sp|P21328|RTJK_DROME
101520	g21435	0.518623	0	NoEnrichment	NA
101533	g10201	0.189739	0	NoEnrichment	NA
101564	g13009	-0.302864	0	NoEnrichment	sp|O43422|P52K_HUMAN
101575	g13010	-0.323801	0	NoEnrichment	NA
101577	g13013	-0.133099	0.00694849	NoEnrichment	sp|P0CR40|SEC24_CRYNJ
101578	g13015	-0.438968	0	NoEnrichment	NA
101579	g13016	-0.624204	0.0470046	NoEnrichment	sp|Q5ZKD9|KLH20_CHICK
101580	g13016	0.532434	0.0470046	NoEnrichment	sp|Q5ZKD9|KLH20_CHICK
101591	g13017	0.24897	0	NoEnrichment	sp|Q13591|SEM5A_HUMAN
101596	g13017	0.87084	0	NoEnrichment	sp|Q13591|SEM5A_HUMAN
101597	g13017	-0.10502	0	NoEnrichment	sp|Q13591|SEM5A_HUMAN
101601	g13019	0.361493	-0.24173	NoEnrichment	sp|P16273|PRPX_HORVU
101611	g13022	-0.185699	0	NoEnrichment	sp|Q53H47|SETMR_HUMAN
101625	g13029	0.136069	0	NoEnrichment	NA
101638	g9116	1.12156	0	NoEnrichment	NA
101639	g9117	0.623707	0	NoEnrichment	NA
101643	g9118	-0.242817	0	NoEnrichment	NA
101676	g9124	-0.319857	0	NoEnrichment	NA
101728	g22611	0.837237	0	NoEnrichment	NA
101735	g22612	0.748285	0.0383063	NoEnrichment	sp|Q91827|AR1_XENLA
10174	g29709	-0.299193	0.0377589	NoEnrichment	sp|Q9HB97|PARVA_RAT
101740	g22612	0.332666	0.0383063	NoEnrichment	sp|Q91827|AR1_XENLA
101741	g22613	-0.514142	0.0225195	NoEnrichment	sp|Q0VD42|TM136_BOVIN
101753	g22615	0.832778	-0.445351	NoEnrichment	sp|Q8HYJ7|FUT5_GORGO
101760	g22616	0.39199	-0.0786929	NoEnrichment	sp|Q5DQR4|STB5L_MOUSE
101761	g22616	-0.080369	-0.0786929	NoEnrichment	sp|Q5DQR4|STB5L_MOUSE
101803	g22624	-0.03213	0.00306733	NoEnrichment	sp|Q7Z494|NPHP3_HUMAN
101808	g31753	0.590579	0	NoEnrichment	NA
101809	g31753	-0.0558148	0	NoEnrichment	NA
101829	g31766	0.697184	0	NoEnrichment	NA
101866	g31795	-0.205827	0.0370101	NoEnrichment	sp|Q8ETH0|HMP_OCEIH
101875	g31795	-0.533575	0.0370101	NoEnrichment	sp|Q8ETH0|HMP_OCEIH
101876	g31795	-0.453813	0.0370101	NoEnrichment	sp|Q8ETH0|HMP_OCEIH
10188	g29711	-0.434334	0.0586198	NoEnrichment	sp|Q9BTV6|DPH7_HUMAN
101893	g31799	-0.222573	0	NoEnrichment	NA
101901	g31803	1.14233	0	NoEnrichment	NA
101902	g31804	0.759629	0	NoEnrichment	NA
101903	g31804	0.566482	0	NoEnrichment	NA
101927	g31813	0.144542	-0.000167863	NoEnrichment	sp|Q6PBK1|CCD58_DANRE
10195	g29711	-0.409148	0.0586198	NoEnrichment	sp|Q9BTV6|DPH7_HUMAN
101960	g18772	-0.108104	0.0084237	NoEnrichment	sp|Q626N3|TM151_CAEBR
101977	g1123	-0.353279	0	NoEnrichment	NA
101985	g1127	0.345271	0.359135	NoEnrichment	sp|Q9NXR5|ANR10_HUMAN
101992	g1128	-0.0390523	0	NoEnrichment	NA
101995	g1131	-0.258979	0	NoEnrichment	NA
101996	g1132	-0.436871	0	NoEnrichment	NA
102042	g1143	0.346067	0	NoEnrichment	sp|Q60997|DMBT1_MOUSE
102049	g1145	0.177356	0	NoEnrichment	sp|P35546|RET_MOUSE
102051	g1145	-0.35833	0	NoEnrichment	sp|P35546|RET_MOUSE
102080	g1155	-0.0843627	0	NoEnrichment	sp|Q86HQ2|ABCG8_DICDI
102083	g1155	-0.497447	0	NoEnrichment	sp|Q86HQ2|ABCG8_DICDI
102147	g1199	0.433761	0.0190036	NoEnrichment	sp|P42674|BP10_PARLI
102153	g1203	-0.239155	0	NoEnrichment	NA
102156	g1205	0.469107	0	NoEnrichment	NA
102261	g21198	-0.141845	0	NoEnrichment	NA
102277	g21201	-0.169791	0.122366	NoEnrichment	sp|Q63430|CSDC2_RAT
102283	g21203	1.05524	0	NoEnrichment	NA
102303	g21208	-0.19498	0.00119827	NoEnrichment	sp|P26369|U2AF2_MOUSE
102312	g21209	0.398991	0	NoEnrichment	NA
102315	g21209	-0.22637	0	NoEnrichment	NA
102337	g21219	-0.983637	-0.884419	Foot	sp|Q90623|MYPT1_CHICK
102349	g21221	-0.858883	0	NoEnrichment	NA
102355	g21221	-0.76239	0	NoEnrichment	NA
102356	g21221	-0.166216	0	NoEnrichment	NA
102371	g21226	-0.788319	0	NoEnrichment	NA
1024	g13519	-0.0600065	0.0506413	NoEnrichment	sp|Q7M456|RNOY_CRAGI
102413	g33476	-0.529571	0	NoEnrichment	NA
102423	g33477	0.501118	-0.41693	NoEnrichment	sp|Q24799|MYPH_ECHGR
102436	g33492	0.161491	0	NoEnrichment	NA
102438	g33492	-0.455445	0	NoEnrichment	NA
102440	g33492	-0.519432	0	NoEnrichment	NA
10245	g29740	1.00793	-0.0154338	NoEnrichment	sp|P33610|PRI2_MOUSE
102450	g33493	0.277821	-0.00843737	NoEnrichment	sp|B3LYS5|FOXO_DROAN
102451	g33493	0.186589	-0.00843737	NoEnrichment	sp|B3LYS5|FOXO_DROAN
102454	g33493	0.147852	-0.00843737	NoEnrichment	sp|B3LYS5|FOXO_DROAN
10246	g29740	1.08074	-0.0154338	NoEnrichment	sp|P33610|PRI2_MOUSE
102486	g23186	0.547637	0	NoEnrichment	NA
102509	g23188	0.317086	0.199411	NoEnrichment	sp|P31646|S6A13_RAT
102511	g23188	-0.121638	0.199411	NoEnrichment	sp|P31646|S6A13_RAT
102513	g23188	-0.216439	0.199411	NoEnrichment	sp|P31646|S6A13_RAT
102541	g23194	-0.197789	0.0093545	NoEnrichment	sp|Q06455|MTG8_HUMAN
102553	g23196	-0.0449454	0	NoEnrichment	NA
102572	g14829	-0.25935	0.142257	NoEnrichment	sp|A1DWM3|MFSD6_PIG
102588	g14831	-0.337737	0.0072212	NoEnrichment	sp|B0UYT5|MFD6B_DANRE
102597	g14832	-0.152646	0.0188982	NoEnrichment	sp|B0UYT5|MFD6B_DANRE
102600	g14832	-0.0958035	0.0188982	NoEnrichment	sp|B0UYT5|MFD6B_DANRE
102610	g14837	-0.0151515	0	NoEnrichment	sp|A1DWM3|MFSD6_PIG
102612	g14838	-0.584971	0.00049543	NoEnrichment	sp|Q8CBH5|MFSD6_MOUSE
102622	g14839	0.0622252	0.0143991	NoEnrichment	sp|B0UYT5|MFD6B_DANRE
102637	g9166	-0.29392	0.108619	NoEnrichment	sp|Q8UWA5|CAH2_TRIHK
102643	g9166	-0.342711	0.108619	NoEnrichment	sp|Q8UWA5|CAH2_TRIHK
102645	g9167	0.324616	0.115505	NoEnrichment	sp|Q8UWA5|CAH2_TRIHK
102661	g9168	0.702489	0	NoEnrichment	sp|P35072|TCB1_CAEBR
102662	g9168	0.230639	0	NoEnrichment	sp|P35072|TCB1_CAEBR
102666	g9168	0.593436	0	NoEnrichment	sp|P35072|TCB1_CAEBR
102667	g9169	0.584863	0.0178317	NoEnrichment	sp|Q8UWA5|CAH2_TRIHK
102669	g9169	0.479695	0.0178317	NoEnrichment	sp|Q8UWA5|CAH2_TRIHK
102678	g9170	-0.257975	-0.00688376	NoEnrichment	sp|Q99808|S29A1_HUMAN
102696	g9180	0.774953	0	NoEnrichment	NA
10271	g29749	1.08384	0.0152688	NoEnrichment	sp|Q24207|BOULE_DROME
102717	g9184	0.286993	-0.0385838	NoEnrichment	sp|P81900|KAPR2_DROME
102729	g9187	-0.140204	-0.0247584	NoEnrichment	sp|P0CG48|UBC_HUMAN
102731	g9187	-0.358922	-0.0247584	NoEnrichment	sp|P0CG48|UBC_HUMAN
102738	g9199	0.549408	0	NoEnrichment	NA
102739	g9199	0.291579	0	NoEnrichment	NA
10274	g29750	1.07999	1.58866	Head	sp|Q98SN7|WNT2B_CHICK
102758	g9205	0.940099	0	NoEnrichment	NA
102776	g9207	0.295954	0	NoEnrichment	NA
102781	g9208	-0.479459	0	NoEnrichment	NA
102788	g9209	0.655339	0.0203869	NoEnrichment	sp|P49916|DNLI3_HUMAN
102791	g9209	-0.845286	0.0203869	NoEnrichment	sp|P49916|DNLI3_HUMAN
102811	g9219	-0.283076	0	NoEnrichment	NA
102821	g9222	0.207773	-0.0616371	NoEnrichment	sp|Q922K7|NOP2_MOUSE
102843	g21939	-0.231304	0	NoEnrichment	NA
102872	g9892	-0.229962	0	NoEnrichment	NA
102878	g9893	0.0656408	0.00986182	NoEnrichment	sp|Q2Q426|AGRE2_MACMU
10289	g29761	0.727687	-0.0132506	NoEnrichment	sp|P25927|BIGA_SALTY
102913	g6898	-0.147313	0.0260526	NoEnrichment	sp|Q8JZM7|CDC73_MOUSE
102942	g6910	0.207731	0	NoEnrichment	sp|Q94K49|ALP1_ARATH
102975	g7710	-0.315873	0.0585334	NoEnrichment	sp|Q54SR8|SGMC_DICDI
102994	g7711	0.50602	0	NoEnrichment	NA
103001	g7717	-0.253901	0.0759449	NoEnrichment	sp|P27080|ADT_CHLRE
103011	g7722	0.473241	0.00627394	NoEnrichment	sp|Q28I85|POC1A_XENTR
103043	g7729	-0.00590107	0	NoEnrichment	NA
103055	g7731	0.0614369	0	NoEnrichment	NA
103061	g7731	-0.0683263	0	NoEnrichment	NA
1031	g13520	0.388374	0	NoEnrichment	NA
103104	g413	-0.252911	0	NoEnrichment	NA
103118	g416	1.10661	0.0158257	NoEnrichment	sp|O94609|UBA1_SCHPO
103148	g431	0.0449251	0	NoEnrichment	NA
10317	g29766	0.234891	-0.0661019	NoEnrichment	sp|Q96S55|WRIP1_HUMAN
103192	g442	0.0789498	0	NoEnrichment	NA
103211	g445	-0.471369	0	NoEnrichment	NA
103212	g445	-0.255675	0	NoEnrichment	NA
103217	g445	0.616044	0	NoEnrichment	NA
103224	g447	1.02705	0	NoEnrichment	sp|Q8IZF6|AGRG4_HUMAN
103225	g447	0.203495	0	NoEnrichment	sp|Q8IZF6|AGRG4_HUMAN
103229	g447	1.66326	0	NoEnrichment	sp|Q8IZF6|AGRG4_HUMAN
103231	g447	1.11747	0	NoEnrichment	sp|Q8IZF6|AGRG4_HUMAN
103235	g448	0.555279	0	NoEnrichment	NA
103236	g448	0.32642	0	NoEnrichment	NA
103243	g449	0.262051	0.144186	NoEnrichment	sp|Q9JHJ0|TMOD3_MOUSE
103244	g449	-0.00235258	0.144186	NoEnrichment	sp|Q9JHJ0|TMOD3_MOUSE
103251	g450	-0.189257	0	NoEnrichment	NA
103270	g453	0.00300656	0.539732	NoEnrichment	sp|P21213|HUTH_RAT
103284	g455	1.42563	0.000909417	NoEnrichment	sp|P21213|HUTH_RAT
103291	g15133	0.4603	0.164011	NoEnrichment	sp|Q6MG82|PRRT1_RAT
103312	g15139	-0.204651	0.0159461	NoEnrichment	sp|Q8BTJ4|ENPP4_MOUSE
103321	g15140	-0.073166	0	NoEnrichment	NA
103322	g15141	1.3358	0.00560827	NoEnrichment	sp|A4IG66|TM201_DANRE
103323	g15141	0.567507	0.00560827	NoEnrichment	sp|A4IG66|TM201_DANRE
103330	g15145	-0.0360767	0	NoEnrichment	NA
103351	g15148	-0.0964287	-0.162669	NoEnrichment	sp|Q5R501|OST48_PONAB
103383	g15159	0.913125	0	NoEnrichment	sp|Q539E5|APX1_HYDVD
103385	g15160	0.678029	0.0017709	NoEnrichment	sp|Q6P3X8|PGBD2_HUMAN
103386	g15160	-0.0881895	0.0017709	NoEnrichment	sp|Q6P3X8|PGBD2_HUMAN
103400	g15167	0.582902	0	NoEnrichment	NA
103414	g15171	-0.33794	-0.0174455	NoEnrichment	sp|P59742|NGB1_ONCMY
103424	g15173	-0.390206	-0.0319971	NoEnrichment	sp|P86881|NGB_DISMA
103433	g15176	-0.17842	0	NoEnrichment	NA
103485	g11433	-0.358667	0	NoEnrichment	NA
103489	g11434	-0.110237	0.0845485	NoEnrichment	sp|P62489|RPB7_RAT
103493	g11437	-0.142104	0.0265848	NoEnrichment	sp|Q96PM5|ZN363_HUMAN
103501	g10856	1.2421	0	NoEnrichment	NA
103509	g10863	0.222479	0	NoEnrichment	NA
103524	g6273	-0.147384	0	NoEnrichment	NA
10353	g26726	0.334487	0	NoEnrichment	NA
103532	g9701	-0.548438	0	NoEnrichment	NA
103563	g9713	0.540546	-0.70039	NoEnrichment	sp|P10039|TENA_CHICK
103574	g9716	0.352096	0	NoEnrichment	NA
103590	g9721	-0.11772	0	NoEnrichment	NA
103591	g9721	0.122389	0	NoEnrichment	NA
103592	g9722	2.01208	0	NoEnrichment	NA
10363	g26728	0.213743	0	NoEnrichment	NA
103646	g28898	0.0796265	0	NoEnrichment	NA
103655	g28899	0.108532	0.202554	NoEnrichment	sp|Q13057|COASY_HUMAN
103702	g18506	0.862761	0	NoEnrichment	NA
103722	g33688	-0.0897225	-0.0924343	NoEnrichment	sp|Q28ZX3|PABP2_DROPS
103741	g21233	0.344773	-0.0609177	NoEnrichment	sp|Q9NPA2|MMP25_HUMAN
103755	g21235	0.0432547	-0.0077857	NoEnrichment	sp|Q94BZ1|ZIFL1_ARATH
103792	g21238	-0.171429	-0.00895814	NoEnrichment	sp|Q9P2K1|C2D2A_HUMAN
103799	g21239	0.17167	0.0102371	NoEnrichment	sp|Q28CZ7|ISPD_XENTR
103818	g21243	0.324483	-0.177689	NoEnrichment	sp|Q5ZIE8|MCAF1_CHICK
103848	g22820	0.214784	0	NoEnrichment	NA
10386	g9837	-0.299875	0	NoEnrichment	NA
103883	g28522	1.08878	0	NoEnrichment	NA
103892	g28523	-0.410817	0	NoEnrichment	NA
103916	g5911	-0.755724	-0.00536895	NoEnrichment	sp|P47810|WEE1_MOUSE
103926	g5915	0.16832	0	NoEnrichment	NA
10395	g9841	0.104302	0.0218262	NoEnrichment	sp|Q60539|TCF15_MESAU
10397	g9841	0.364735	0.0218262	NoEnrichment	sp|Q60539|TCF15_MESAU
103982	g5926	-0.271209	0.0776937	NoEnrichment	sp|P10076|ZFP26_MOUSE
103983	g5926	-0.127553	0.0776937	NoEnrichment	sp|P10076|ZFP26_MOUSE
104001	g5933	0.0592073	0.105404	NoEnrichment	sp|P17276|PH4H_DROME
104002	g5933	0.391107	0.105404	NoEnrichment	sp|P17276|PH4H_DROME
10403	g9842	-0.0825928	0	NoEnrichment	NA
10404	g9842	0.899196	0	NoEnrichment	NA
104048	g20683	-0.459942	0	NoEnrichment	NA
104084	g15379	0.346055	0	NoEnrichment	NA
104094	g15381	0.250429	0	NoEnrichment	sp|A0A0R4IBK5|R213A_DANRE
104095	g15382	0.417484	0.105253	NoEnrichment	sp|Q6ZSS7|MFSD6_HUMAN
1041	g13528	1.09947	0.00233164	NoEnrichment	sp|P41935|HM10_CAEEL
104113	g15387	-0.368387	-0.296353	NoEnrichment	sp|Q566X8|DMX1B_DANRE
104126	g15389	-0.245189	0.00307863	NoEnrichment	sp|Q682T9|CALM5_ARATH
104128	g15390	-0.149052	0.249731	NoEnrichment	sp|Q9Y619|ORNT1_HUMAN
104129	g15390	-0.62203	0.249731	NoEnrichment	sp|Q9Y619|ORNT1_HUMAN
104130	g15390	0.181161	0.249731	NoEnrichment	sp|Q9Y619|ORNT1_HUMAN
104194	g29648	-0.298134	0	NoEnrichment	NA
1042	g13528	1.21459	0.00233164	NoEnrichment	sp|P41935|HM10_CAEEL
104203	g29654	0.252589	0.157848	NoEnrichment	sp|Q28C55|DLG1_XENTR
104207	g29655	1.43137	0	NoEnrichment	NA
104209	g29655	0.947855	0	NoEnrichment	NA
104212	g29657	0.552198	0	NoEnrichment	NA
104226	g29660	-0.193039	0	NoEnrichment	sp|Q9D0B5|TSTD3_MOUSE
104230	g29660	-0.228851	0	NoEnrichment	sp|Q9D0B5|TSTD3_MOUSE
104231	g29661	-0.145386	0.0110901	NoEnrichment	sp|Q6P5G6|UBXN7_MOUSE
104238	g29664	0.0533945	0	NoEnrichment	NA
104239	g29664	-0.190696	0	NoEnrichment	NA
10425	g9853	0.0770011	0.0196179	NoEnrichment	sp|Q9H7Z3|NRDE2_HUMAN
104277	g31570	-0.138673	0	NoEnrichment	NA
104278	g31570	-0.196927	0	NoEnrichment	NA
104299	g30189	-0.181312	0	NoEnrichment	NA
104310	g19474	-0.46252	0	NoEnrichment	NA
104320	g19476	-0.232662	0	NoEnrichment	NA
104321	g19476	-0.0186494	0	NoEnrichment	NA
104324	g19476	-0.510493	0	NoEnrichment	NA
104328	g19480	-0.638785	-0.0387907	NoEnrichment	sp|Q9VAS7|INX3_DROME
104329	g19480	-0.409434	-0.0387907	NoEnrichment	sp|Q9VAS7|INX3_DROME
104330	g19480	-0.196296	-0.0387907	NoEnrichment	sp|Q9VAS7|INX3_DROME
104336	g19480	0.144198	-0.0387907	NoEnrichment	sp|Q9VAS7|INX3_DROME
104350	g19494	0.285261	0	NoEnrichment	NA
104362	g19496	-0.076134	-0.376124	NoEnrichment	sp|P63255|CRIP1_RAT
104367	g19497	0.169502	0	NoEnrichment	NA
104369	g19497	0.786677	0	NoEnrichment	NA
104370	g19497	0.384478	0	NoEnrichment	NA
104371	g19498	-0.175849	0.0159532	NoEnrichment	sp|D3YXG0|HMCN1_MOUSE
104372	g19498	0.798166	0.0159532	NoEnrichment	sp|D3YXG0|HMCN1_MOUSE
104396	g19502	0.336608	0.123502	NoEnrichment	sp|Q5RID7|SNX17_DANRE
104401	g19503	0.205556	-0.0391342	NoEnrichment	sp|O35491|CLK2_MOUSE
104402	g19503	-0.166779	-0.0391342	NoEnrichment	sp|O35491|CLK2_MOUSE
104406	g19507	-0.37021	0	NoEnrichment	sp|Q5JVL4|EFHC1_HUMAN
104409	g19508	-0.224077	-0.00203669	NoEnrichment	sp|Q9JIS1|RIMS2_RAT
104418	g19512	-0.245048	0.0119602	NoEnrichment	sp|Q9JIS1|RIMS2_RAT
104425	g19513	0.0467639	-0.188532	NoEnrichment	sp|Q8WQI5|RS8_SPOFR
104426	g19513	-0.073355	-0.188532	NoEnrichment	sp|Q8WQI5|RS8_SPOFR
104455	g19522	-0.0236299	0	NoEnrichment	NA
104475	g24010	-0.223368	0	NoEnrichment	sp|Q4KMJ1|CHAC2_DANRE
104477	g24011	0.572271	0.000335314	NoEnrichment	sp|Q9CPW0|CNTP2_MOUSE
1045	g13529	0.0878052	0	NoEnrichment	NA
104500	g24017	0.952047	0.282088	NoEnrichment	sp|Q9C0J1|B3GN4_HUMAN
10452	g9871	0.360061	-0.0593015	NoEnrichment	sp|Q6P2K6|P4R3A_MOUSE
104535	g24028	0.713926	-0.0762101	NoEnrichment	sp|Q9C0J1|B3GN4_HUMAN
104549	g24035	0.871024	0	NoEnrichment	NA
104555	g24036	2.42046	0	NoEnrichment	NA
104563	g24037	2.04031	0	NoEnrichment	NA
104565	g24037	0.591317	0	NoEnrichment	NA
104571	g24037	0.420876	0	NoEnrichment	NA
104578	g24038	0.281723	-0.00746077	NoEnrichment	sp|P58389|PTPA_MOUSE
104592	g24043	-0.342963	0	NoEnrichment	NA
104610	g24047	0.303078	0.0915163	NoEnrichment	sp|Q9C0J1|B3GN4_HUMAN
104632	g217	-0.230877	0.0642281	NoEnrichment	sp|Q94900|GLUCL_DROME
10464	g9875	0.598129	-0.0077287	NoEnrichment	sp|Q9Y2V0|CO041_HUMAN
104650	g224	-0.488163	0	NoEnrichment	NA
104651	g224	-0.431676	0	NoEnrichment	NA
104653	g224	-0.53445	0	NoEnrichment	NA
104655	g224	-0.563728	0	NoEnrichment	NA
104659	g225	0.353081	0.0236741	NoEnrichment	sp|P17972|KCNAW_DROME
10466	g9879	0.109741	-0.0934519	NoEnrichment	sp|Q95NT6|MTH2_DROYA
104696	g24534	0.185507	-0.0255442	NoEnrichment	sp|Q1PSW8|LIN41_MOUSE
104697	g24534	0.808532	-0.0255442	NoEnrichment	sp|Q1PSW8|LIN41_MOUSE
104701	g24534	0.493768	-0.0255442	NoEnrichment	sp|Q1PSW8|LIN41_MOUSE
104731	g24543	-0.775247	0	NoEnrichment	NA
104739	g24548	0.189479	-0.00706062	NoEnrichment	sp|Q6Q4H1|JMJD6_HYDVU
104740	g9515	-0.247371	0.375282	NoEnrichment	sp|P86870|VA5_VESMG
104756	g9519	-0.245704	-0.00449105	NoEnrichment	sp|Q804Q5|FEZF2_DANRE
104770	g9520	0.682585	0.158609	NoEnrichment	sp|P13797|PLST_HUMAN
104784	g9524	-0.29001	0.406164	NoEnrichment	sp|Q5RC84|HEXA_PONAB
104789	g9527	-0.865914	0.113801	NoEnrichment	sp|A6H742|PLSI_BOVIN
104811	g9538	-0.179092	0.0718113	NoEnrichment	sp|Q9BWJ5|SF3B5_HUMAN
104812	g9539	-0.0195146	0.0890116	NoEnrichment	sp|P21328|RTJK_DROME
104818	g9541	-0.175886	-0.0194341	NoEnrichment	sp|Q7ZTL7|BCS1_XENLA
104826	g9542	-0.546702	-0.00804106	NoEnrichment	sp|Q6GL75|DCC1_XENTR
104828	g9543	-0.296861	0.0891581	NoEnrichment	sp|O55164|MPDZ_RAT
104839	g9549	0.645169	0	NoEnrichment	NA
104841	g9550	0.77299	0	NoEnrichment	NA
104843	g9550	2.24137	0	NoEnrichment	NA
104846	g9551	-0.131772	1.76482	NoEnrichment	sp|P38978|KS1_HYDVU
10488	g9882	0.406436	0	NoEnrichment	NA
104888	g27076	-0.737796	0.0198527	NoEnrichment	sp|Q8N5D0|WDTC1_HUMAN
104896	g27078	0.321675	-0.051817	NoEnrichment	sp|Q60610|TIAM1_MOUSE
104923	g27080	-0.740416	-0.103695	NoEnrichment	sp|Q8BGK5|S35F1_MOUSE
104924	g27080	-0.24062	-0.103695	NoEnrichment	sp|Q8BGK5|S35F1_MOUSE
104933	g27082	-0.355005	0.52277	NoEnrichment	sp|Q80U40|RIMB2_MOUSE
104945	g27084	-0.100766	0.012001	NoEnrichment	sp|Q8WU66|TSEAR_HUMAN
104952	g27085	0.268416	0	NoEnrichment	NA
104990	g27095	-0.0743934	0	NoEnrichment	NA
105002	g27099	0.290728	0.114163	NoEnrichment	sp|Q96SZ4|ZSC10_HUMAN
105024	g27106	-0.133304	0.00215066	NoEnrichment	sp|P61149|FGF1_RAT
105038	g27119	-0.505658	0	NoEnrichment	NA
105039	g27119	-1.35351	0	NoEnrichment	NA
105100	g32699	-0.144663	0.0234147	NoEnrichment	sp|Q8BTT6|DIEXF_MOUSE
105107	g32700	0.050803	0.0112628	NoEnrichment	sp|Q9NQR9|G6PC2_HUMAN
105130	g32707	-0.41355	0.0199569	NoEnrichment	sp|Q9NQC3|RTN4_HUMAN
105137	g32710	0.589849	-0.00809483	NoEnrichment	sp|Q0P6H9|TMM62_HUMAN
10515	g7468	-0.246043	0	NoEnrichment	NA
105161	g32716	0.562873	0	NoEnrichment	NA
105188	g18777	0.0755615	0	NoEnrichment	NA
105189	g18777	0.0777865	0	NoEnrichment	NA
105198	g18779	-0.604267	-0.409123	NoEnrichment	sp|Q61041|NPY4R_MOUSE
105199	g18779	-1.1181	-0.409123	NoEnrichment	sp|Q61041|NPY4R_MOUSE
105200	g18779	-0.656186	-0.409123	NoEnrichment	sp|Q61041|NPY4R_MOUSE
105201	g18779	-1.34653	-0.409123	Foot	sp|Q61041|NPY4R_MOUSE
105288	g11925	-0.0115179	-0.140462	NoEnrichment	sp|Q9BUZ4|TRAF4_HUMAN
105291	g11925	0.0400053	-0.140462	NoEnrichment	sp|Q9BUZ4|TRAF4_HUMAN
105292	g11925	0.876891	-0.140462	NoEnrichment	sp|Q9BUZ4|TRAF4_HUMAN
105296	g11925	-0.164089	-0.140462	NoEnrichment	sp|Q9BUZ4|TRAF4_HUMAN
105308	g11929	-0.164019	0.0023187	NoEnrichment	sp|Q8WMY2|FPPS_BOVIN
10533	g26528	0.222298	0.0318547	NoEnrichment	sp|Q5RFU0|SIAE_PONAB
105337	g11949	0.688429	0	NoEnrichment	NA
105338	g11950	-0.151384	0.0556975	NoEnrichment	sp|Q8CFH6|SIK2_MOUSE
105341	g11950	0.214775	0.0556975	NoEnrichment	sp|Q8CFH6|SIK2_MOUSE
105357	g11952	-0.226169	0.147723	NoEnrichment	sp|Q9V3B4|FADD_DROME
105365	g11956	0.388544	0.016925	NoEnrichment	sp|Q5THJ4|VP13D_HUMAN
105384	g11962	0.399725	0	NoEnrichment	NA
105391	g11969	0.00168362	0.00799776	NoEnrichment	sp|D3YXG0|HMCN1_MOUSE
105414	g11977	0.471319	0	NoEnrichment	NA
105442	g11989	0.614244	0	NoEnrichment	NA
105443	g11989	0.452269	0	NoEnrichment	NA
105456	g11994	1.23149	0	NoEnrichment	NA
105471	g11996	1.10997	0.0571628	NoEnrichment	sp|A5PN43|TM175_DANRE
105479	g12000	-0.0617461	-0.00859193	NoEnrichment	sp|Q9CXY1|TM175_MOUSE
105512	g12014	-0.243597	0	NoEnrichment	NA
105526	g12021	-0.0561155	0	NoEnrichment	NA
105545	g12024	-0.273207	-0.0902589	NoEnrichment	sp|Q4PM12|RL36_IXOSC
105546	g12024	-0.0489344	-0.0902589	NoEnrichment	sp|Q4PM12|RL36_IXOSC
105547	g12024	-0.174385	-0.0902589	NoEnrichment	sp|Q4PM12|RL36_IXOSC
105577	g23730	-0.223842	-0.203444	NoEnrichment	sp|Q28735|TMEDA_RABIT
105580	g23731	-0.168869	0	NoEnrichment	NA
105582	g23731	-0.108157	0	NoEnrichment	NA
105595	g23732	-0.513822	0	NoEnrichment	NA
105598	g23733	-0.0283503	0	NoEnrichment	NA
105600	g23734	0.0930785	0.0463968	NoEnrichment	sp|Q8BYM7|RSH4A_MOUSE
105611	g23740	0.403207	0	NoEnrichment	NA
105613	g23740	-0.232191	0	NoEnrichment	NA
105665	g23752	0.229423	0	NoEnrichment	NA
105673	g23753	0.517601	-1.99778	NoEnrichment	sp|Q9LMN8|WAK3_ARATH
10568	g7365	0.638437	0	NoEnrichment	NA
105686	g15308	-0.103665	0	NoEnrichment	sp|P02699|OPSD_BOVIN
105692	g15311	0.683878	0	NoEnrichment	NA
105745	g28083	0.387012	1.27117e-05	NoEnrichment	sp|Q6DN14|MCTP1_HUMAN
105749	g28084	0.080417	-0.00547407	NoEnrichment	sp|Q6DN12|MCTP2_HUMAN
105760	g9	0.64482	0	NoEnrichment	NA
105763	g9	-0.338229	0	NoEnrichment	NA
105782	g9	0.040673	0	NoEnrichment	NA
105785	g10	0.930313	0	NoEnrichment	NA
105786	g10	-0.558914	0	NoEnrichment	NA
105787	g10	0.118991	0	NoEnrichment	NA
10579	g7366	0.0646992	0	NoEnrichment	NA
105821	g15	-0.179705	-0.0176029	NoEnrichment	sp|P49355|FNTB_BOVIN
105829	g16	0.145488	0	NoEnrichment	NA
105855	g23	0.10596	0	NoEnrichment	NA
105867	g28	-0.128481	0.158425	NoEnrichment	sp|P62744|AP2S1_RAT
105882	g33	0.18601	0.0372884	NoEnrichment	sp|Q8BPM2|M4K5_MOUSE
105888	g13385	0.0585019	0	NoEnrichment	NA
105939	g7262	-0.547165	0.167388	NoEnrichment	sp|P35224|CTNB_URECA
105940	g7262	0.641938	0.167388	NoEnrichment	sp|P35224|CTNB_URECA
105945	g7262	-0.593835	0.167388	NoEnrichment	sp|P35224|CTNB_URECA
106046	g21597	0.286718	-0.0460804	NoEnrichment	sp|Q92047|PIMT_DANRE
106056	g21600	0.15712	0	NoEnrichment	NA
106059	g21601	-0.173616	0	NoEnrichment	NA
106074	g21605	-0.450639	0.0228393	NoEnrichment	sp|Q6PF21|SYMC_XENLA
106076	g21605	-0.372625	0.0228393	NoEnrichment	sp|Q6PF21|SYMC_XENLA
106077	g21605	-0.317916	0.0228393	NoEnrichment	sp|Q6PF21|SYMC_XENLA
106079	g21605	-0.568815	0.0228393	NoEnrichment	sp|Q6PF21|SYMC_XENLA
106083	g21606	1.08877	0.000544163	NoEnrichment	sp|B4PPK2|FOSL_DROYA
106085	g21607	0.657557	-0.0301435	NoEnrichment	sp|Q96AT9|RPE_HUMAN
106106	g21613	0.606759	0.12184	NoEnrichment	sp|Q4QQV8|CHMP5_RAT
106108	g21613	0.834621	0.12184	NoEnrichment	sp|Q4QQV8|CHMP5_RAT
106109	g21613	1.12634	0.12184	NoEnrichment	sp|Q4QQV8|CHMP5_RAT
106114	g21614	0.373636	-0.00212554	NoEnrichment	sp|P46824|KLC_DROME
106123	g21527	-0.0267277	0.0054107	NoEnrichment	sp|Q91736|EPB1B_XENLA
106125	g21527	-0.553646	0.0054107	NoEnrichment	sp|Q91736|EPB1B_XENLA
106135	g21535	-0.085729	0	NoEnrichment	NA
106140	g2675	0.0347024	0	NoEnrichment	sp|Q4R6I1|GIN1_MACFA
106182	g2698	1.05562	0.0185163	NoEnrichment	sp|F1S5L4|GPAT1_PIG
106199	g2703	-0.259365	0.00563826	NoEnrichment	sp|Q7Z494|NPHP3_HUMAN
10624	g7349	-0.221862	0	NoEnrichment	NA
106258	g2716	0.235535	0	NoEnrichment	NA
106259	g2716	-0.160036	0	NoEnrichment	NA
106267	g2717	-0.248383	-0.00345365	NoEnrichment	sp|Q05438|BMR1B_CHICK
106275	g2717	0.550396	-0.00345365	NoEnrichment	sp|Q05438|BMR1B_CHICK
106282	g2718	-0.497557	0.0273427	NoEnrichment	sp|Q9QZ67|PPM1D_MOUSE
106369	g24070	0.276084	1.51597	NoEnrichment	sp|P70567|TMOD1_RAT
106370	g24070	-0.211485	1.51597	NoEnrichment	sp|P70567|TMOD1_RAT
106372	g24070	-0.223129	1.51597	NoEnrichment	sp|P70567|TMOD1_RAT
106376	g24071	-0.394873	-0.00228554	NoEnrichment	sp|P32305|5HT7R_RAT
106377	g24071	-0.135911	-0.00228554	NoEnrichment	sp|P32305|5HT7R_RAT
106391	g960	0.261644	0	NoEnrichment	NA
1064	g26315	0.603109	0	NoEnrichment	NA
10644	g7353	0.581359	0	NoEnrichment	NA
10645	g7354	0.190079	0	NoEnrichment	NA
106452	g17940	-0.47779	-0.214709	NoEnrichment	sp|Q24799|MYPH_ECHGR
106480	NA	-0.252446	0	NoEnrichment	NA
106498	g13394	-0.138316	0	NoEnrichment	NA
106504	g13395	-0.158584	0	NoEnrichment	NA
106517	g13400	-0.184968	0.0657932	NoEnrichment	sp|Q3ZBL4|LZTL1_BOVIN
106520	g13404	-0.126197	0	NoEnrichment	NA
106539	g13406	0.140991	0.0228179	NoEnrichment	sp|Q75N73|S39AE_MOUSE
106542	g13406	0.0387187	0.0228179	NoEnrichment	sp|Q75N73|S39AE_MOUSE
106543	g13406	-0.280356	0.0228179	NoEnrichment	sp|Q75N73|S39AE_MOUSE
10656	g7358	-0.478596	0	NoEnrichment	NA
10716	g9932	0.381454	0	NoEnrichment	NA
10752	g20052	0.38788	-0.0728162	NoEnrichment	sp|Q6PAX2|ATD3B_XENLA
10755	g20052	-0.315502	-0.0728162	NoEnrichment	sp|Q6PAX2|ATD3B_XENLA
10757	g20054	-0.045343	0	NoEnrichment	NA
10790	g17377	-0.214703	0	NoEnrichment	NA
10802	g17386	0.171789	0	NoEnrichment	NA
1082	g26316	-0.171754	0	NoEnrichment	NA
10829	g17392	0.211468	1.1348	NoEnrichment	sp|Q4R7D3|SAXO1_MACFA
10839	g17396	-0.559986	0	NoEnrichment	NA
10840	g17396	-1.62565	0	NoEnrichment	NA
10843	g17396	0.210441	0	NoEnrichment	NA
10871	g12319	0.687489	0.00495711	NoEnrichment	sp|Q9HCK4|ROBO2_HUMAN
10882	g12322	0.222475	-0.0151492	NoEnrichment	sp|P40240|CD9_MOUSE
10893	g12322	0.0231732	-0.0151492	NoEnrichment	sp|P40240|CD9_MOUSE
10903	g12323	0.246709	0	NoEnrichment	NA
10952	g12342	0.00391341	-0.818722	NoEnrichment	sp|Q6TLI9|DRD2_MUSPF
10953	g12342	0.628782	-0.818722	NoEnrichment	sp|Q6TLI9|DRD2_MUSPF
10954	g12342	0.336629	-0.818722	NoEnrichment	sp|Q6TLI9|DRD2_MUSPF
10976	g12355	-0.641336	0	NoEnrichment	NA
10977	g12355	0.292329	0	NoEnrichment	NA
10986	g12355	-0.434633	0	NoEnrichment	NA
10999	g12357	-0.95931	0.00903672	NoEnrichment	sp|Q9BXB5|OSB10_HUMAN
11023	g12366	-0.081562	0	NoEnrichment	NA
1103	g18273	-0.1942	0	NoEnrichment	NA
11035	g12368	-0.329799	0.016379	NoEnrichment	sp|P16389|KCNA2_HUMAN
11036	g12368	0.0480038	0.016379	NoEnrichment	sp|P16389|KCNA2_HUMAN
11045	g12368	-0.725282	0.016379	NoEnrichment	sp|P16389|KCNA2_HUMAN
11099	g6256	0.268688	0	NoEnrichment	NA
11100	g6257	0.457975	0.151603	NoEnrichment	sp|Q5XXP2|OPN4_PHOSU
11130	g21478	0.00507452	0	NoEnrichment	NA
11151	g21479	0.459992	0.0411562	NoEnrichment	sp|A1ZAX0|CCH1R_DROME
11154	g21482	-0.133581	0	NoEnrichment	sp|Q7JQ07|MOS1T_DROMA
11173	g21488	0.486049	-0.00937347	NoEnrichment	sp|O57422|OPN4B_XENLA
11179	g21488	-0.781218	-0.00937347	NoEnrichment	sp|O57422|OPN4B_XENLA
11194	g21491	1.00562	0.0177149	NoEnrichment	sp|P30974|TLR1_DROME
11231	g21508	1.51035	0	NoEnrichment	NA
11241	NA	-0.429677	0	NoEnrichment	NA
11246	g19700	0.410074	0	NoEnrichment	NA
11248	g19700	0.368076	0	NoEnrichment	NA
11315	g15451	-0.546639	-0.0378777	NoEnrichment	sp|P47799|FSHR_HORSE
11316	g15451	-1.18492	-0.0378777	NoEnrichment	sp|P47799|FSHR_HORSE
11341	g15457	-0.0248227	0.152909	NoEnrichment	sp|O35815|ATX3_RAT
11343	g15457	-0.608275	0.152909	NoEnrichment	sp|O35815|ATX3_RAT
11353	g15463	0.136279	0	NoEnrichment	NA
11363	g15465	0.584407	0.0197554	NoEnrichment	sp|Q9BST9|RTKN_HUMAN
11364	g15466	0.177141	0.00118663	NoEnrichment	sp|Q6P3R8|NEK5_HUMAN
11373	g15470	0.190319	0	NoEnrichment	NA
11421	g6239	-0.450192	0	NoEnrichment	NA
11429	g32620	-0.250098	0	NoEnrichment	NA
11459	g19999	-0.635093	0	NoEnrichment	NA
11518	g5851	-0.421504	-0.0780488	NoEnrichment	sp|Q8C172|CERS6_MOUSE
1153	g12686	0.632913	0	NoEnrichment	NA
11537	g33319	0.129559	0	NoEnrichment	sp|D3YXG0|HMCN1_MOUSE
11538	g33319	-0.260506	0	NoEnrichment	sp|D3YXG0|HMCN1_MOUSE
11542	g33323	-0.194287	0	NoEnrichment	NA
11591	g23020	-0.185484	0	NoEnrichment	NA
11618	g23030	0.234021	0	NoEnrichment	sp|P31696|AGRIN_CHICK
11619	g23030	0.528449	0	NoEnrichment	sp|P31696|AGRIN_CHICK
11640	g22578	0.524651	-0.0192108	NoEnrichment	sp|Q96LD8|SENP8_HUMAN
11644	g22580	-0.181683	0	NoEnrichment	NA
11646	g22580	0.215647	0	NoEnrichment	NA
11648	g22582	0.413691	0	NoEnrichment	sp|P0CT43|TF28_SCHPO
11656	g22584	0.8223	0.0106602	NoEnrichment	sp|Q5ZIM6|AATF_CHICK
11659	g22585	0.313103	0.210078	NoEnrichment	sp|Q91Z46|DUS7_MOUSE
11660	g22585	0.540946	0.210078	NoEnrichment	sp|Q91Z46|DUS7_MOUSE
11690	g29219	0.185919	0.00522343	NoEnrichment	sp|P35072|TCB1_CAEBR
11697	g29225	-0.677175	0	NoEnrichment	NA
117	g18885	0.336906	0	NoEnrichment	NA
11719	g29231	-0.244626	0.0717309	NoEnrichment	sp|P26638|SYSC_MOUSE
11720	g29232	-0.20009	0	NoEnrichment	NA
11722	g29234	-0.266389	0.116801	NoEnrichment	sp|Q28E95|SH3R1_XENTR
11743	g29242	-0.174718	0	NoEnrichment	NA
11760	g29250	1.08004	-0.0717097	NoEnrichment	sp|Q3UTQ8|CDKL5_MOUSE
11767	g29257	1.31543	0.0624024	NoEnrichment	sp|Q8SQ72|SGCG_CANLF
11781	g29260	0.352214	0.0535704	NoEnrichment	sp|Q6PG95|CRML_MOUSE
11788	g29261	0.204061	0	NoEnrichment	NA
11800	g29264	-0.183089	0.0338156	NoEnrichment	sp|Q14185|DOCK1_HUMAN
11813	g29266	0.00977131	-0.304537	NoEnrichment	sp|P51830|ADCY9_MOUSE
11815	g29266	-0.583748	-0.304537	NoEnrichment	sp|P51830|ADCY9_MOUSE
11816	g29267	-1.1687	0	NoEnrichment	NA
11819	g29267	-0.395034	0	NoEnrichment	NA
11834	g29272	-0.323797	-0.00392888	NoEnrichment	sp|P16395|ACM1_DROME
11852	g29283	0.4466	0	NoEnrichment	NA
11853	g29284	0.0214937	0	NoEnrichment	sp|Q9NBX4|RTXE_DROME
11862	g29286	0.0688651	0.0797389	NoEnrichment	sp|Q7Z333|SETX_HUMAN
11863	g29287	-0.122395	0	NoEnrichment	NA
11906	g29298	-0.176127	0.0458749	NoEnrichment	sp|Q9VZW5|FMAR_DROME
11924	g29300	-0.25974	0	NoEnrichment	NA
11925	g29300	0.287165	0	NoEnrichment	NA
11934	g29303	-0.183829	0	NoEnrichment	NA
11947	g29308	0.961685	0.00214771	NoEnrichment	sp|Q4L235|ACSF4_HUMAN
11967	g29314	0.520468	0	NoEnrichment	NA
11983	g29317	-0.000697756	0.000534771	NoEnrichment	sp|Q6DCX5|PCFT_XENLA
11995	g29319	0.0653003	0.0455531	NoEnrichment	sp|O15118|NPC1_HUMAN
12	g5780	-0.332353	0	NoEnrichment	NA
120	g18886	-0.0474486	0	NoEnrichment	NA
12017	g29326	0.708103	0	NoEnrichment	NA
12020	g29327	-0.32346	0.0448436	NoEnrichment	sp|Q96AJ9|VTI1A_HUMAN
12033	g29331	-0.330282	0	NoEnrichment	NA
12041	g29332	0.409156	0.00383783	NoEnrichment	sp|O15974|OPSD2_MIZYE
12063	g22519	0.44791	0	NoEnrichment	NA
12066	g22521	-0.234186	0	NoEnrichment	NA
12086	g1351	0.069086	0	NoEnrichment	NA
12087	g1351	0.113389	0	NoEnrichment	NA
12090	g1351	-0.367863	0	NoEnrichment	NA
12094	g1352	0.644303	0	NoEnrichment	NA
12101	g1355	-0.0806104	0	NoEnrichment	NA
12150	g1510	-0.120497	0	NoEnrichment	NA
12151	g1511	-0.19125	0	NoEnrichment	NA
12153	g1512	-0.0902471	0	NoEnrichment	sp|P08770|TRA1_MAIZE
12198	g30702	-0.313188	0.109553	NoEnrichment	sp|Q4R3M6|NDUS5_MACFA
12213	g30704	0.47629	0	NoEnrichment	sp|Q53H47|SETMR_HUMAN
12218	g30705	-0.17684	0	NoEnrichment	sp|Q3ZCU0|YK006_HUMAN
12240	g30707	0.390042	0.122377	NoEnrichment	sp|P20072|ANXA7_BOVIN
12244	g30708	0.41846	0.106015	NoEnrichment	sp|Q0P594|PP2AB_BOVIN
12248	g30709	0.752466	0.899478	NoEnrichment	sp|A6QPN6|GILT_BOVIN
12252	g30710	-0.254023	-0.00309087	NoEnrichment	sp|Q8K370|ACD10_MOUSE
12258	g30719	0.895047	0.025982	NoEnrichment	sp|Q6JQN1|ACD10_HUMAN
12278	g30722	0.278695	0.00958095	NoEnrichment	sp|D1MGU1|SLB_PROJR
12285	g30724	0.495407	0	NoEnrichment	NA
12287	g30724	-0.91759	0	NoEnrichment	NA
12294	g30728	0.914428	0	NoEnrichment	NA
12295	g30728	1.94428	0	NoEnrichment	NA
12360	g15770	0.300169	0	NoEnrichment	NA
12388	g13309	0.0135313	-0.0561068	NoEnrichment	sp|P41252|SYIC_HUMAN
12394	g4995	-0.143164	0.151639	NoEnrichment	sp|P63079|GBRB3_RAT
1243	g23832	-0.270634	0.00517763	NoEnrichment	sp|Q9LS44|PCR4_ARATH
12482	g29346	0.244093	0.00245641	NoEnrichment	sp|O70585|DTNB_MOUSE
12531	g7437	-0.318055	0.00692781	NoEnrichment	sp|Q5GIS3|GBB_PINFU
12542	g32930	0.374747	0.0789728	NoEnrichment	sp|Q2U7A3|ACT_ASPOR
12543	g32930	-0.0638052	0.0789728	NoEnrichment	sp|Q2U7A3|ACT_ASPOR
12544	g32930	0.344446	0.0789728	NoEnrichment	sp|Q2U7A3|ACT_ASPOR
12545	g32930	0.385001	0.0789728	NoEnrichment	sp|Q2U7A3|ACT_ASPOR
12546	g32930	0.545108	0.0789728	NoEnrichment	sp|Q2U7A3|ACT_ASPOR
12552	g32931	0.0632494	-0.000989788	NoEnrichment	sp|Q9YHB5|CND3_XENLA
12579	g32943	-0.0497753	0	NoEnrichment	NA
12603	g32956	0.727861	0.030731	NoEnrichment	sp|Q04637|IF4G1_HUMAN
12682	g8189	0.341036	0	NoEnrichment	NA
12687	g8190	0.469013	0	NoEnrichment	NA
12692	g8192	0.0797879	0	NoEnrichment	NA
12753	g26066	0.077125	0.00372132	NoEnrichment	sp|Q3MV19|TRF6A_XENLA
12769	g9285	-0.31005	0	NoEnrichment	sp|O75132|ZBED4_HUMAN
1277	g23834	-0.364969	0.0156633	NoEnrichment	sp|Q640L2|SPX3_XENLA
12785	g6408	0.235382	0	NoEnrichment	NA
12791	g6413	0.256104	0.013283	NoEnrichment	sp|Q13045|FLII_HUMAN
12811	g6414	-0.0871801	0.0104121	NoEnrichment	sp|A6NHR9|SMHD1_HUMAN
1282	g23835	-0.0650813	0	NoEnrichment	sp|Q17QZ3|SPX3_BOVIN
12820	g6417	-0.949759	0.0276999	NoEnrichment	sp|Q9CZR2|NALD2_MOUSE
12821	g6417	0.420305	0.0276999	NoEnrichment	sp|Q9CZR2|NALD2_MOUSE
12827	g6417	-0.115201	0.0276999	NoEnrichment	sp|Q9CZR2|NALD2_MOUSE
12844	g6422	-0.177072	0	NoEnrichment	NA
12864	g6429	0.342422	0	NoEnrichment	sp|F1QBY1|NIPLB_DANRE
12871	g18546	-0.324988	-0.00919204	NoEnrichment	sp|Q3MV19|TRF6A_XENLA
12903	g9811	0.325067	0.104723	NoEnrichment	sp|A2AJ76|HMCN2_MOUSE
12931	g9814	-0.262625	0	NoEnrichment	NA
12965	g9819	0.136911	-4.51345	NoEnrichment	sp|P86179|CSL3_ONCKE
12966	g9819	-0.189917	-4.51345	NoEnrichment	sp|P86179|CSL3_ONCKE
12967	g9820	0.798027	0	NoEnrichment	NA
12968	g9820	0.134598	0	NoEnrichment	NA
13018	g9830	-0.0926422	0	NoEnrichment	NA
13019	g9830	-0.129777	0	NoEnrichment	NA
13020	g9830	-0.0567145	0	NoEnrichment	NA
13021	g9830	-0.391472	0	NoEnrichment	NA
13044	g9835	-0.0946385	0.148713	NoEnrichment	sp|Q9I8S4|AZIN2_XENLA
13045	g9835	0.695237	0.148713	NoEnrichment	sp|Q9I8S4|AZIN2_XENLA
13053	g29096	0.662373	0	NoEnrichment	NA
13061	g29097	0.154389	0	NoEnrichment	NA
13070	g29098	-0.0674889	0	NoEnrichment	NA
13082	g29099	1.32409	0.225315	Head	sp|B8VIW9|FP_ACRMI
13131	g19215	-0.90303	0	NoEnrichment	NA
13132	g19216	0.101668	0.00335	NoEnrichment	sp|Q6GQB9|EDEM3_XENLA
13157	g19218	-0.143032	0	NoEnrichment	NA
13164	g19219	-0.356336	0	NoEnrichment	NA
13169	g19220	-0.25052	0	NoEnrichment	NA
13170	g19220	-0.480444	0	NoEnrichment	NA
13177	g19221	-0.602933	0	NoEnrichment	NA
13181	g19222	0.315248	0	NoEnrichment	NA
13193	g19222	0.625721	0	NoEnrichment	NA
13200	g19223	0.125385	0	NoEnrichment	NA
1321	g11048	0.584663	-0.00715075	NoEnrichment	sp|Q64077|NK2R_CAVPO
13210	g19229	-0.337704	0	NoEnrichment	NA
13235	g19232	0.746636	0	NoEnrichment	NA
13239	g19232	0.269731	0	NoEnrichment	NA
1324	g11048	0.778704	-0.00715075	NoEnrichment	sp|Q64077|NK2R_CAVPO
13252	g19235	-0.227391	0.00787344	NoEnrichment	sp|O94818|NOL4_HUMAN
13272	g19240	-0.143651	0	NoEnrichment	NA
13282	g19240	-0.0124261	0	NoEnrichment	NA
13283	g19240	3.25279	0	NoEnrichment	NA
13284	g19240	-0.513885	0	NoEnrichment	NA
1329	g11049	0.461941	0	NoEnrichment	sp|P35072|TCB1_CAEBR
1330	g11049	0.459708	0	NoEnrichment	sp|P35072|TCB1_CAEBR
13311	g9691	0.657133	0.0404671	NoEnrichment	sp|Q9VHR6|ATG13_DROME
13312	g9691	0.571495	0.0404671	NoEnrichment	sp|Q9VHR6|ATG13_DROME
13317	g9693	1.45354	0.198834	NoEnrichment	sp|P18503|CAS4_EPHMU
13322	g9693	1.36424	0.198834	Head	sp|P18503|CAS4_EPHMU
13326	g9693	-0.0197584	0.198834	NoEnrichment	sp|P18503|CAS4_EPHMU
13332	g9694	0.212658	0.683072	NoEnrichment	sp|Q6I6M7|FGF1_CYNPY
13337	g9694	0.895561	0.683072	NoEnrichment	sp|Q6I6M7|FGF1_CYNPY
13338	g9694	0.898269	0.683072	Head	sp|Q6I6M7|FGF1_CYNPY
13356	g30675	-0.392411	-0.0746547	NoEnrichment	sp|Q8BGC4|PTGR3_MOUSE
1338	g11054	0.0724028	0	NoEnrichment	NA
13401	g30681	-0.232384	-5.60968e-05	NoEnrichment	sp|Q25452|CAC1M_MUSDO
13444	g19984	-0.654194	0.00171484	NoEnrichment	sp|Q02225|SKI_XENLA
13445	g19984	-0.23802	0.00171484	NoEnrichment	sp|Q02225|SKI_XENLA
13447	g19984	-0.334474	0.00171484	NoEnrichment	sp|Q02225|SKI_XENLA
13448	g19984	-0.601696	0.00171484	NoEnrichment	sp|Q02225|SKI_XENLA
1347	g11056	-0.40376	0	NoEnrichment	NA
1348	g11056	0.26492	0	NoEnrichment	NA
1350	g11057	-0.555944	0	NoEnrichment	NA
13507	g22625	-0.26832	0	NoEnrichment	NA
13522	g22625	0.436914	0	NoEnrichment	NA
13524	g22626	0.225979	0.0144301	NoEnrichment	sp|Q9QXS1|PLEC_MOUSE
13535	g22633	1.67785	0.0165393	NoEnrichment	sp|P34275|IVD_CAEEL
13536	g22633	1.53082	0.0165393	NoEnrichment	sp|P34275|IVD_CAEEL
13542	g22636	0.457242	0	NoEnrichment	NA
13545	g22636	-0.0640732	0	NoEnrichment	NA
13546	g22636	0.288003	0	NoEnrichment	NA
13547	g22636	0.464325	0	NoEnrichment	NA
13550	g22637	1.02793	0	NoEnrichment	NA
13551	g22637	0.574565	0	NoEnrichment	NA
13552	g22637	0.50233	0	NoEnrichment	NA
13556	g22638	-0.732403	0	NoEnrichment	NA
13558	g22638	0.696567	0	NoEnrichment	NA
1356	g11058	-0.435749	-0.110819	NoEnrichment	sp|C4R7Z3|C9MT_KOMPG
13586	g22646	0.843497	-0.0182186	NoEnrichment	sp|P0CH95|PHF8_DANRE
13590	g22646	-0.888542	-0.0182186	NoEnrichment	sp|P0CH95|PHF8_DANRE
13592	g22646	-0.344839	-0.0182186	NoEnrichment	sp|P0CH95|PHF8_DANRE
13600	g22647	1.36865	0	NoEnrichment	NA
13601	g22647	0.836373	0	NoEnrichment	NA
13623	g22652	1.48221	0	NoEnrichment	NA
13636	g22656	0.289206	0.00195833	NoEnrichment	sp|Q59WG5|Y2336_CANAL
13641	g22657	-0.419483	0	NoEnrichment	sp|Q3ZCU0|YK006_HUMAN
13642	g22657	-1.0957	0	NoEnrichment	sp|Q3ZCU0|YK006_HUMAN
13647	g22659	-0.704326	0	NoEnrichment	NA
1365	g11059	-0.55882	0.0217685	NoEnrichment	sp|Q9BQI7|PSD2_HUMAN
13669	g22663	-0.388007	0	NoEnrichment	NA
13695	g22671	-0.173969	0.0420736	NoEnrichment	sp|Q12792|TWF1_HUMAN
13710	g22674	0.0927497	0	NoEnrichment	NA
13711	g22674	0.417044	0	NoEnrichment	NA
13717	g22677	0.87594	0.183796	NoEnrichment	sp|Q8IWV2|CNTN4_HUMAN
13719	g22677	0.942658	0.183796	NoEnrichment	sp|Q8IWV2|CNTN4_HUMAN
13725	g22677	-0.454164	0.183796	NoEnrichment	sp|Q8IWV2|CNTN4_HUMAN
13749	g22680	-0.0830065	0.00893181	NoEnrichment	sp|Q3E6S9|CNIF3_ARATH
13766	g22688	0.204659	0.00517933	NoEnrichment	sp|Q91348|F26L_CHICK
13789	g22695	0.94391	0	NoEnrichment	NA
13790	g22695	0.757513	0	NoEnrichment	NA
13811	g10816	-0.242664	0	NoEnrichment	NA
13823	g10818	-0.00567114	0.0365797	NoEnrichment	sp|Q7TN88|PK1L2_MOUSE
13832	g10820	0.216706	0	NoEnrichment	NA
13844	g25524	0.791201	0.0827365	NoEnrichment	sp|Q66GQ5|RWA3_ARATH
13848	g25524	-0.672279	0.0827365	NoEnrichment	sp|Q66GQ5|RWA3_ARATH
13861	g234	0.196997	1.44694	NoEnrichment	sp|P05933|CALM_SCHPO
13873	g236	0.465741	-0.0647773	NoEnrichment	sp|Q02104|LIP1_PSYIM
13886	g240	0.44152	0.0865983	NoEnrichment	sp|P25325|THTM_HUMAN
13894	g242	0.667668	0	NoEnrichment	NA
13906	g245	0.733828	0.241509	NoEnrichment	sp|A7MB28|NDRG3_BOVIN
13918	g247	0.0118742	-0.0127868	NoEnrichment	sp|O15160|RPAC1_HUMAN
13921	g249	-0.105	0.0267212	NoEnrichment	sp|Q1LZH1|MARC2_BOVIN
13924	g253	0.0799876	-0.0383976	NoEnrichment	sp|Q9JK24|P2R3C_MOUSE
13933	g264	0.398968	0	NoEnrichment	NA
13939	g266	-0.0514034	0.0733982	NoEnrichment	sp|Q5XHF8|VIP2_XENLA
1394	g11070	0.231837	0.0988328	NoEnrichment	sp|Q5TCZ1|SPD2A_HUMAN
13944	g266	-0.245896	0.0733982	NoEnrichment	sp|Q5XHF8|VIP2_XENLA
13945	g267	0.451455	-0.753273	NoEnrichment	sp|Q0V8G2|GABP2_BOVIN
13948	g268	-0.188475	-0.0338853	NoEnrichment	sp|Q5REW1|IYD1_PONAB
13950	g269	0.240406	0.046432	NoEnrichment	sp|Q9BGT1|TTC9C_MACFA
13960	g276	-0.0918275	-0.00267445	NoEnrichment	sp|Q9JII5|DAZP1_MOUSE
13969	g278	0.526594	0	NoEnrichment	sp|Q4R3D6|ZMYM5_MACFA
13994	g14067	-0.00287144	0.00792134	NoEnrichment	sp|Q3UYK3|TBCD9_MOUSE
13996	g14067	0.117716	0.00792134	NoEnrichment	sp|Q3UYK3|TBCD9_MOUSE
14008	g14071	-0.0525282	0.0118145	NoEnrichment	sp|Q8CG19|LTBP1_MOUSE
14041	g14076	0.613188	0	NoEnrichment	sp|Q95SX7|RTBS_DROME
14053	g14090	1.05689	0	NoEnrichment	NA
14054	g14090	-0.0430118	0	NoEnrichment	NA
14057	g14092	0.139026	0	NoEnrichment	sp|P86854|PLCL_MYTGA
1406	g6610	0.199816	0	NoEnrichment	NA
14066	g14094	0.790872	0	NoEnrichment	NA
14072	g14094	0.0678935	0	NoEnrichment	NA
14100	g14105	-0.195078	0.00308273	NoEnrichment	sp|D3YXG0|HMCN1_MOUSE
14142	g9073	-0.425659	0	NoEnrichment	sp|C6KSQ6|RAD50_PLAF7
14172	g31170	0.413463	-0.000862014	NoEnrichment	sp|Q9TV36|FBN1_PIG
14202	g31198	-0.17927	0.232686	NoEnrichment	sp|Q8R4T9|UT2_MOUSE
14204	g31198	0.344465	0.232686	NoEnrichment	sp|Q8R4T9|UT2_MOUSE
14229	g20056	0.877823	0	NoEnrichment	NA
14231	g20059	0.245137	0	NoEnrichment	NA
14233	g20059	-0.448307	0	NoEnrichment	NA
1424	g6615	0.0651923	0	NoEnrichment	NA
14248	g20062	0.101119	0.00687551	NoEnrichment	sp|P18761|CAH6_MOUSE
14276	g20071	0.848374	0.0274809	NoEnrichment	sp|Q10462|CAH5_CAEEL
14300	g20080	0.364702	-0.0217809	NoEnrichment	sp|P00491|PNPH_HUMAN
14315	g20083	1.31914	-0.0400152	NoEnrichment	sp|O57525|CP17A_RANDY
14321	g20085	0.372022	-0.0109906	NoEnrichment	sp|Q8VI75|IPO4_MOUSE
14335	g20089	-0.202025	0	NoEnrichment	NA
14378	g20100	0.968525	0	NoEnrichment	NA
14390	g20102	-0.656377	0	NoEnrichment	NA
14417	g20105	0.0681997	0	NoEnrichment	NA
14442	g20108	0.0882722	0	NoEnrichment	NA
14456	g20115	0.168817	0	NoEnrichment	NA
14457	g20116	0.0049071	0	NoEnrichment	NA
14460	g20117	0.229708	0	NoEnrichment	NA
14461	g20117	0.264003	0	NoEnrichment	NA
14462	g20117	-1.08661	0	NoEnrichment	NA
1447	g6619	0.0724586	0	NoEnrichment	NA
14470	g20118	0.755911	0	NoEnrichment	NA
1449	g6619	-0.273413	0	NoEnrichment	NA
14500	g20127	-0.1527	-0.00293834	NoEnrichment	sp|Q64514|TPP2_MOUSE
14504	g27127	0.811204	0	NoEnrichment	sp|Q8CJ12|AGRG2_MOUSE
14564	g21749	0.107182	0	NoEnrichment	sp|P21328|RTJK_DROME
14565	g21749	0.0767177	0	NoEnrichment	sp|P21328|RTJK_DROME
14572	g21751	0.555067	0.0672038	NoEnrichment	sp|Q7T381|BOKB_DANRE
14580	g21753	-0.175118	-0.0189505	NoEnrichment	sp|Q8R2M2|TDIF2_MOUSE
14583	g21754	-0.0677539	0.0115823	NoEnrichment	sp|Q9BTA9|WAC_HUMAN
14594	g21755	-0.191234	0.00622787	NoEnrichment	sp|P51128|RXRA_XENLA
14628	g21760	0.258	0.0312231	NoEnrichment	sp|P55112|NAS4_CAEEL
14632	g21761	1.30845	0.00202257	NoEnrichment	sp|Q9Y5R5|DMRT2_HUMAN
14633	g21761	1.40586	0.00202257	NoEnrichment	sp|Q9Y5R5|DMRT2_HUMAN
14636	g21761	-0.399847	0.00202257	NoEnrichment	sp|Q9Y5R5|DMRT2_HUMAN
14671	g21777	-0.222415	0	NoEnrichment	NA
14680	g21780	0.0480719	0.155681	NoEnrichment	sp|P17126|ACT_HYDVU
14681	g21780	-0.0679392	0.155681	NoEnrichment	sp|P17126|ACT_HYDVU
14687	g21782	0.228435	-0.175189	NoEnrichment	sp|P13135|CPNS1_BOVIN
14688	g21782	0.826214	-0.175189	NoEnrichment	sp|P13135|CPNS1_BOVIN
14692	g21783	0.0797408	0.00275021	NoEnrichment	sp|Q03426|KIME_HUMAN
14729	g21792	0.542559	0	NoEnrichment	NA
14733	g21793	0.637906	0	NoEnrichment	NA
14770	g21807	-0.254896	0	NoEnrichment	sp|Q6AXJ9|CDKL1_DANRE
14828	g22268	-0.502146	0	NoEnrichment	NA
14841	g22270	-0.0640656	-0.117527	NoEnrichment	sp|Q9JIX8|ACINU_MOUSE
1485	g6626	-0.116755	0.00485902	NoEnrichment	sp|E9PZZ1|PRD13_MOUSE
14852	g22276	0.0975684	-0.0265588	NoEnrichment	sp|P30664|MCM4B_XENLA
14863	g22284	0.370973	0	NoEnrichment	NA
14864	g22284	0.687994	0	NoEnrichment	NA
14881	g24469	0.000865846	0	NoEnrichment	NA
14883	g24469	-0.50148	0	NoEnrichment	NA
14888	g24469	-0.182272	0	NoEnrichment	NA
14898	g24470	-0.098442	0	NoEnrichment	sp|P78559|MAP1A_HUMAN
1490	g6628	-0.167469	0.175155	NoEnrichment	sp|Q5RDJ7|CLCN3_PONAB
14938	g3220	1.22452	0.034699	NoEnrichment	sp|Q9TWL9|COMA_CONMA
14944	g3221	-0.498934	0.980546	NoEnrichment	sp|Q7T2H2|FGRL1_CHICK
14949	g3222	0.375718	0.218142	NoEnrichment	sp|A6YP92|ARX_RAT
14952	g3223	0.00459325	0	NoEnrichment	NA
14970	g3229	0.20137	0	NoEnrichment	NA
14971	g3229	1.41358	0	NoEnrichment	NA
14997	g3238	0.134639	0.128684	NoEnrichment	sp|A2RVM0|TIC32_ARATH
15007	g12118	-0.35494	0	NoEnrichment	NA
15038	g9381	0.472327	0	NoEnrichment	NA
1508	g6635	-0.161678	0.0815506	NoEnrichment	sp|Q7Z7L7|ZER1_HUMAN
15109	NA	0.2905	0	NoEnrichment	NA
15119	g13653	0.0538073	0	NoEnrichment	NA
15175	g13666	0.0647767	0	NoEnrichment	NA
15179	g13667	-0.17307	-0.0301842	NoEnrichment	sp|Q587J7|TDR12_HUMAN
15185	g13674	-0.230068	0.166749	NoEnrichment	sp|Q86T03|TM55B_HUMAN
15195	NA	-0.230517	0	NoEnrichment	NA
15219	NA	0.0653799	0	NoEnrichment	NA
15226	NA	0.434414	0	NoEnrichment	NA
15249	NA	-0.102183	0	NoEnrichment	NA
15288	g27925	0.344773	0.0375759	NoEnrichment	sp|D2IYS2|TORSO_BOMMO
15322	g27953	-0.139852	0.0124916	NoEnrichment	sp|Q62432|SMAD2_MOUSE
15333	g27958	0.702539	0.0156864	NoEnrichment	sp|Q8NCM2|KCNH5_HUMAN
15351	g27960	-0.451325	0	NoEnrichment	NA
15352	g27960	-3.51853	0	NoEnrichment	NA
15356	NA	-0.0376442	0	NoEnrichment	NA
15360	g9100	-0.0827657	-0.110469	NoEnrichment	sp|Q91V92|ACLY_MOUSE
15367	g9102	-0.192064	0.0174194	NoEnrichment	sp|Q00534|CDK6_HUMAN
15380	g9106	0.434661	0	NoEnrichment	NA
15382	g9107	-0.187976	0.0385644	NoEnrichment	sp|D3YXS5|KIF28_MOUSE
15400	g9114	-0.601423	0	NoEnrichment	NA
15409	g32575	-0.0190556	0	NoEnrichment	NA
15410	g32575	-0.0316423	0	NoEnrichment	NA
1544	g6648	-0.386112	0.00673248	NoEnrichment	sp|Q9C0J1|B3GN4_HUMAN
15445	g31108	0.190982	0	NoEnrichment	NA
15455	g13918	0.448342	0.18916	NoEnrichment	sp|P31836|NCAM1_BOVIN
15469	g13924	0.342603	-0.0201052	NoEnrichment	sp|Q32L27|UB2Q2_BOVIN
15475	g13927	0.746515	0	NoEnrichment	NA
15481	g13928	0.187275	-0.0272743	NoEnrichment	sp|Q6GM44|MARH5_XENLA
15483	g13928	-0.184629	-0.0272743	NoEnrichment	sp|Q6GM44|MARH5_XENLA
15530	g13933	-0.165174	0	NoEnrichment	NA
15538	g13937	0.376514	0	NoEnrichment	NA
15548	g13940	-0.470871	0	NoEnrichment	NA
15555	g13944	0.142777	0.0148526	NoEnrichment	sp|A2XQE8|SAG39_ORYSI
15559	g13944	1.12698	0.0148526	NoEnrichment	sp|A2XQE8|SAG39_ORYSI
15561	g13945	0.812007	0	NoEnrichment	NA
15566	g13950	-0.204864	0	NoEnrichment	NA
15620	g8418	-0.168582	0	NoEnrichment	NA
1563	g6656	-0.113924	-0.0103833	NoEnrichment	sp|Q5MYA4|H32_CICIN
15638	g8428	1.0375	0	NoEnrichment	NA
15639	g8430	-0.00802384	0	NoEnrichment	NA
15670	NA	-0.304593	0	NoEnrichment	NA
1568	g6657	0.209175	0.00570298	NoEnrichment	sp|Q8NI77|KI18A_HUMAN
15691	g32915	0.0964183	-0.0532582	NoEnrichment	sp|Q28C98|MESH1_XENTR
15698	g32917	-0.18016	0.0286729	NoEnrichment	sp|P32609|PEP7_YEAST
15705	g32919	-0.371284	0	NoEnrichment	NA
15707	g32919	-0.35081	0	NoEnrichment	NA
15716	g32919	-1.34034	0	NoEnrichment	NA
15717	g32919	-1.70621	0	NoEnrichment	NA
15718	g32919	-0.912049	0	NoEnrichment	NA
1574	g6657	-0.0910494	0.00570298	NoEnrichment	sp|Q8NI77|KI18A_HUMAN
15753	g16116	0.0360694	0	NoEnrichment	NA
15784	g7459	-1.22796	0.000557925	NoEnrichment	sp|P78325|ADAM8_HUMAN
15785	g7459	-1.03775	0.000557925	NoEnrichment	sp|P78325|ADAM8_HUMAN
15799	g153	0.742456	0	NoEnrichment	NA
15800	g154	0.286337	0	NoEnrichment	sp|P11680|PROP_MOUSE
15801	g154	-0.358404	0	NoEnrichment	sp|P11680|PROP_MOUSE
15806	g156	-0.0892972	0	NoEnrichment	NA
15824	g160	0.549067	0	NoEnrichment	NA
1583	g6658	0.0522206	-0.00182985	NoEnrichment	sp|Q9D489|SOLH2_MOUSE
15836	g167	-0.552465	0	NoEnrichment	NA
15859	g173	-0.28245	0	NoEnrichment	NA
1586	g3597	0.0747452	0	NoEnrichment	NA
15893	g187	-0.0976971	-0.0832229	NoEnrichment	sp|Q96ES7|SGF29_HUMAN
15927	g202	-0.279571	-0.0894414	NoEnrichment	sp|Q9Y5A9|YTHD2_HUMAN
15956	g213	-0.0319569	0	NoEnrichment	NA
15962	g213	-0.065378	0	NoEnrichment	NA
15963	g213	-0.312842	0	NoEnrichment	NA
15987	g4665	0.531564	0.0165708	NoEnrichment	sp|Q2HJ23|MLP3A_BOVIN
16001	g4669	-0.24636	0.0903657	NoEnrichment	sp|Q7ZWA3|RBMX_DANRE
16007	g4670	-0.237677	0	NoEnrichment	NA
16008	g4670	-1.05184	0	NoEnrichment	NA
16011	g4670	-0.217675	0	NoEnrichment	NA
16023	g4672	1.66415	0.00225581	NoEnrichment	sp|P08016|EGGS_SCHMA
16056	g4682	-0.0863116	0	NoEnrichment	NA
16061	g14003	-0.234234	-0.0383107	NoEnrichment	sp|O35607|BMPR2_MOUSE
16064	g14003	-0.195417	-0.0383107	NoEnrichment	sp|O35607|BMPR2_MOUSE
16096	g1738	-1.80133	0	NoEnrichment	NA
1610	g3605	1.39412	0	NoEnrichment	NA
16106	g1742	-0.582187	-0.0967696	NoEnrichment	sp|Q5XXP2|OPN4_PHOSU
16107	g1742	0.491701	-0.0967696	NoEnrichment	sp|Q5XXP2|OPN4_PHOSU
16111	g1743	0.288438	0.100279	NoEnrichment	sp|Q16363|LAMA4_HUMAN
1612	g3605	1.2112	0	NoEnrichment	NA
16121	g1744	0.116643	0.136752	NoEnrichment	sp|Q00174|LAMA_DROME
16124	g1744	0.561241	0.136752	NoEnrichment	sp|Q00174|LAMA_DROME
1613	g3605	1.07033	0	NoEnrichment	NA
16130	g1745	0.0334666	-0.31457	NoEnrichment	sp|Q7ZWF4|RN145_DANRE
16138	g1747	0.278401	0.0153554	NoEnrichment	sp|Q7TMV1|RN139_MOUSE
16145	g1748	-0.168941	-0.0398189	NoEnrichment	sp|Q64181|PROP_CAVPO
16148	g1749	-0.185492	-0.0600345	NoEnrichment	sp|Q28F07|ANM1_XENTR
16159	g1751	0.236062	-3.06558	NoEnrichment	sp|Q539E5|APX1_HYDVD
16172	g1757	0.429978	0	NoEnrichment	NA
16173	g1758	-0.243214	0	NoEnrichment	NA
16174	g1758	-0.0444848	0	NoEnrichment	NA
16186	g1760	-0.187587	0.00150124	NoEnrichment	sp|P61294|RAB6B_MOUSE
1619	g3607	-0.158589	0	NoEnrichment	sp|Q9H5L6|THAP9_HUMAN
16196	g1764	-0.36968	0	NoEnrichment	NA
16197	g1765	0.147476	0.0555796	NoEnrichment	sp|Q9Y376|CAB39_HUMAN
16198	g1765	-0.43297	0.0555796	NoEnrichment	sp|Q9Y376|CAB39_HUMAN
16202	g1767	-0.0997524	0.00352537	NoEnrichment	sp|Q55FK2|RAB6_DICDI
16209	g1768	0.873832	0.0677721	NoEnrichment	sp|Q6GP53|NAA50_XENLA
16210	g1768	0.788244	0.0677721	NoEnrichment	sp|Q6GP53|NAA50_XENLA
16213	g1768	0.811285	0.0677721	NoEnrichment	sp|Q6GP53|NAA50_XENLA
16230	g1775	-0.0568306	0	NoEnrichment	NA
16231	g1775	0.280436	0	NoEnrichment	NA
16238	g1777	-0.247695	0	NoEnrichment	NA
16243	g1778	-0.108787	0	NoEnrichment	NA
16265	g1783	0.449922	0.00548585	NoEnrichment	sp|Q8K0Z9|GP153_MOUSE
16282	g1785	0.602183	0	NoEnrichment	NA
16283	g1785	-0.00266034	0	NoEnrichment	NA
16289	g1803	-0.665387	0	NoEnrichment	NA
16300	g1821	0.37484	0	NoEnrichment	NA
16308	g1823	0.245751	-0.00156703	NoEnrichment	sp|Q3B8G7|IR3IP_XENLA
16310	g1824	0.362892	0.146695	NoEnrichment	sp|Q9ES74|NEK7_MOUSE
1633	g3617	0.114592	0	NoEnrichment	NA
16348	g1836	-0.151922	0.0165005	NoEnrichment	sp|Q8AWH3|SX17A_XENTR
16371	g1844	2.30801	-0.128417	NoEnrichment	sp|Q90Z10|RL13_DANRE
1639	g3621	0.0717163	0	NoEnrichment	NA
16402	g1851	0.823803	0	NoEnrichment	NA
16413	g1856	-0.22325	0	NoEnrichment	NA
16424	g1858	0.231939	0.000306417	NoEnrichment	sp|Q2Z1R2|SOX1B_DANRE
16428	g1858	-0.261532	0.000306417	NoEnrichment	sp|Q2Z1R2|SOX1B_DANRE
16429	g1858	-0.504733	0.000306417	NoEnrichment	sp|Q2Z1R2|SOX1B_DANRE
16432	g1860	0.0956586	0	NoEnrichment	NA
16436	g1865	0.015025	0	NoEnrichment	sp|Q95SX7|RTBS_DROME
16449	g1868	-0.823606	0	NoEnrichment	sp|Q02391|GSLG1_CHICK
16475	g1872	0.467751	-0.0363561	NoEnrichment	sp|Q9ULB1|NRX1A_HUMAN
16495	g1874	-0.0934238	-0.0800478	NoEnrichment	sp|P56945|BCAR1_HUMAN
16512	g1877	0.884757	0.0288779	NoEnrichment	sp|Q6TMK4|POXA_DICDI
16518	g1879	-0.00642327	0	NoEnrichment	NA
16534	g1881	-0.63671	-0.00383316	NoEnrichment	sp|O43402|EMC8_HUMAN
16535	g1881	-0.664154	-0.00383316	NoEnrichment	sp|O43402|EMC8_HUMAN
16537	g1882	-0.366744	0.0318385	NoEnrichment	sp|Q99L88|SNTB1_MOUSE
16541	g1882	0.638335	0.0318385	NoEnrichment	sp|Q99L88|SNTB1_MOUSE
16548	g1882	-0.0667629	0.0318385	NoEnrichment	sp|Q99L88|SNTB1_MOUSE
16549	g1882	-0.258704	0.0318385	NoEnrichment	sp|Q99L88|SNTB1_MOUSE
1655	g3626	-0.653466	0	NoEnrichment	NA
16567	g30932	-0.128513	0.0265348	NoEnrichment	sp|O43824|GTPB6_HUMAN
16582	g30935	0.5423	0.0882287	NoEnrichment	sp|Q8VDV3|R3GEF_MOUSE
16598	g6659	1.24608	0.00354631	NoEnrichment	sp|Q8HXX6|SAP3_MACFA
166	g18912	-0.143182	-0.0306945	NoEnrichment	sp|O75179|ANR17_HUMAN
16611	g6667	0.291906	0	NoEnrichment	NA
16622	g6671	-0.246514	0	NoEnrichment	NA
16646	g13898	0.184373	0.0553274	NoEnrichment	sp|Q7PHR1|KIF1A_ANOGA
16647	g13899	0.131359	0	NoEnrichment	sp|C6KSQ6|RAD50_PLAF7
16657	g13903	-0.0980032	-0.00333423	NoEnrichment	sp|Q9UKF6|CPSF3_HUMAN
16678	g13906	-0.0177159	-0.111623	NoEnrichment	sp|Q5ZJ65|FA76A_CHICK
16681	g13907	-0.0330118	-0.360143	NoEnrichment	sp|O88866|HUNK_MOUSE
16686	g13907	-0.111114	-0.360143	NoEnrichment	sp|O88866|HUNK_MOUSE
16687	g13907	-0.350968	-0.360143	NoEnrichment	sp|O88866|HUNK_MOUSE
16688	g13907	-0.264332	-0.360143	NoEnrichment	sp|O88866|HUNK_MOUSE
16700	g13915	0.37416	0.00408616	NoEnrichment	sp|Q5BIP8|DNJB5_BOVIN
16703	g13917	0.741366	0	NoEnrichment	NA
16704	g13917	0.612292	0	NoEnrichment	NA
16712	NA	-0.386524	0	NoEnrichment	NA
16738	g10838	1.04207	0	NoEnrichment	NA
16793	g47	0.258656	0	NoEnrichment	NA
1680	NA	0.201232	0	NoEnrichment	NA
16826	g33236	0.16534	0	NoEnrichment	NA
16836	g33238	-0.229298	0	NoEnrichment	NA
16837	g33238	-0.373423	0	NoEnrichment	NA
16840	g33238	0.589875	0	NoEnrichment	NA
16850	g33239	0.107623	0.0182572	NoEnrichment	sp|F1MCA7|LRRC7_BOVIN
16856	g33242	0.587652	0	NoEnrichment	NA
1686	NA	-0.472506	0	NoEnrichment	NA
16862	g33243	-0.0681138	0	NoEnrichment	sp|P21328|RTJK_DROME
16880	g33253	2.6383	0.0755431	NoEnrichment	sp|Q9Z1P7|KANK3_MOUSE
16881	g33253	1.00495	0.0755431	NoEnrichment	sp|Q9Z1P7|KANK3_MOUSE
16886	g33253	0.686678	0.0755431	NoEnrichment	sp|Q9Z1P7|KANK3_MOUSE
16935	g6262	-0.288692	0	NoEnrichment	NA
16950	g19552	-0.384291	0	NoEnrichment	NA
17010	g29774	0.62013	0	NoEnrichment	NA
17016	g29774	1.24286	0	NoEnrichment	NA
17025	g6717	-0.0740192	0	NoEnrichment	NA
17044	g11733	0.560393	-0.0747535	NoEnrichment	sp|P42297|YXIE_BACSU
17052	g11736	0.11557	0.0949444	NoEnrichment	sp|Q91770|NOT2_XENLA
17083	g11746	-0.136474	0	NoEnrichment	NA
17089	g11748	-0.747024	-0.244095	NoEnrichment	sp|Q20191|NAS13_CAEEL
17140	g11761	-0.136044	0.0287992	NoEnrichment	sp|Q9JHX4|CASP8_RAT
17154	g1680	-0.139816	0.187552	NoEnrichment	sp|Q06646|AT5G2_RAT
17196	g1705	1.85957	-0.0332566	NoEnrichment	sp|Q8N8A2|ANR44_HUMAN
17201	g33722	-0.222852	0	NoEnrichment	NA
17240	g33729	-0.127292	-0.183001	NoEnrichment	sp|A4J6H7|HEM3_DESRM
17256	g33731	-0.709171	-0.238491	NoEnrichment	sp|P70566|TMOD2_RAT
17259	g33731	-0.367569	-0.238491	NoEnrichment	sp|P70566|TMOD2_RAT
17261	g33731	-0.780762	-0.238491	NoEnrichment	sp|P70566|TMOD2_RAT
17298	g33738	-0.251755	0	NoEnrichment	NA
17299	g33738	-0.364313	0	NoEnrichment	NA
17318	g33744	-0.638752	0	NoEnrichment	NA
17321	g33744	-0.71572	0	NoEnrichment	NA
17323	g33744	-0.400368	0	NoEnrichment	NA
17344	g33748	1.27357	0	NoEnrichment	sp|Q2KNE5|OPN4A_DANRE
17361	g20570	-0.19191	0	NoEnrichment	NA
17412	g4955	-0.0631054	0.0192934	NoEnrichment	sp|Q49SH1|NCKX5_DANRE
1743	g26915	0.163514	0	NoEnrichment	NA
17486	g14267	-0.498181	0.201431	NoEnrichment	sp|Q921D9|GRHL1_MOUSE
17513	g14275	0.0270795	0	NoEnrichment	NA
17515	g14275	-0.0772667	0	NoEnrichment	NA
17588	g9908	-0.053491	-0.00106791	NoEnrichment	sp|Q9Y4C8|RBM19_HUMAN
17596	g9912	0.0711496	-0.186689	NoEnrichment	sp|Q9R099|TBL2_MOUSE
176	g18914	0.178016	0.0162544	NoEnrichment	sp|Q63750|RM23_RAT
17636	g22825	0.123397	0.0150924	NoEnrichment	sp|Q9DBU0|TM9S1_MOUSE
17665	g22829	-0.106987	0.00727153	NoEnrichment	sp|Q9EQV6|TPP1_RAT
17713	g22848	-0.271136	0	NoEnrichment	NA
1772	g28526	-0.0986479	0.000856673	NoEnrichment	sp|Q60855|RIPK1_MOUSE
17744	g12037	0.602441	0	NoEnrichment	sp|A7S7F2|BYST_NEMVE
17747	g12038	-1.89231	0	NoEnrichment	NA
17748	g12038	-0.686795	0	NoEnrichment	NA
1775	g28529	-0.087822	0	NoEnrichment	NA
17759	g12040	0.396436	0	NoEnrichment	NA
17764	g12042	0.512041	0	NoEnrichment	NA
17767	g12043	-0.0234635	0.118163	NoEnrichment	sp|P26990|ARF6_CHICK
17780	g12046	-0.382295	0.0682512	NoEnrichment	sp|Q63150|DPYS_RAT
17786	g12048	-0.151439	-0.0719625	NoEnrichment	sp|P62282|RS11_RAT
17793	g12054	0.066154	-0.0363509	NoEnrichment	sp|Q6NZZ4|TM107_DANRE
17797	g12055	0.253685	0	NoEnrichment	NA
17799	g12056	-0.111816	0	NoEnrichment	NA
17801	g12056	0.0350427	0	NoEnrichment	NA
17834	g12061	0.497631	0.0697813	NoEnrichment	sp|Q08DQ2|GFPT2_BOVIN
17872	g9565	0.057064	-2.17284	NoEnrichment	sp|Q27746|DNMT1_PARLI
17875	g9565	0.652084	-2.17284	NoEnrichment	sp|Q27746|DNMT1_PARLI
17876	g9565	1.75924	-2.17284	NoEnrichment	sp|Q27746|DNMT1_PARLI
17877	g9565	1.32526	-2.17284	NoEnrichment	sp|Q27746|DNMT1_PARLI
17878	g9565	0.67173	-2.17284	NoEnrichment	sp|Q27746|DNMT1_PARLI
17900	g9571	0.708242	0	NoEnrichment	NA
17909	g9572	0.393497	-0.0064649	NoEnrichment	sp|P26436|ASPX_HUMAN
17924	g9575	-0.586603	0	NoEnrichment	NA
17927	g9576	-0.380071	-0.00550391	NoEnrichment	sp|B5X4E0|CALUB_SALSA
1793	NA	0.617742	0	NoEnrichment	NA
17930	g9577	-0.224617	-0.019485	NoEnrichment	sp|Q1RMR2|RU17_BOVIN
17967	g8541	-0.452206	0.10804	NoEnrichment	sp|Q9QZD5|RAE2_MOUSE
17969	g8549	-0.386955	0.174204	NoEnrichment	sp|Q58CP9|STIM1_BOVIN
17975	g8550	-0.255482	-0.155706	NoEnrichment	sp|Q9UHC3|ASIC3_HUMAN
18013	g8566	-0.426471	0.0441239	NoEnrichment	sp|E9Q414|APOB_MOUSE
18015	g8566	0.362489	0.0441239	NoEnrichment	sp|E9Q414|APOB_MOUSE
18023	g8566	0.413588	0.0441239	NoEnrichment	sp|E9Q414|APOB_MOUSE
18039	g8573	0.314353	0	NoEnrichment	NA
18044	g8574	0.179561	0	NoEnrichment	NA
18048	g8574	-0.0823014	0	NoEnrichment	NA
18049	g8574	-0.0997896	0	NoEnrichment	NA
18064	g8581	0.0588203	0	NoEnrichment	sp|P21329|RTJK_DROFU
18065	g8582	-0.0974515	0.0724155	NoEnrichment	sp|Q0P4L9|TMM19_XENTR
18079	g8589	-0.330331	0.0360135	NoEnrichment	sp|Q5ZKP7|S2536_CHICK
18082	g8590	0.401295	0.117724	NoEnrichment	sp|A6QLE6|ANO4_BOVIN
18111	g8603	-0.681419	-0.0590611	NoEnrichment	sp|Q6ZR37|PKHG7_HUMAN
18113	g8603	-0.20095	-0.0590611	NoEnrichment	sp|Q6ZR37|PKHG7_HUMAN
18117	g8603	-0.182706	-0.0590611	NoEnrichment	sp|Q6ZR37|PKHG7_HUMAN
1812	g7336	0.327038	0	NoEnrichment	NA
18133	g8604	-0.153404	-0.0630223	NoEnrichment	sp|Q58D06|WDR74_BOVIN
18136	g8604	0.0200178	-0.0630223	NoEnrichment	sp|Q58D06|WDR74_BOVIN
18167	g8608	0.0587266	0	NoEnrichment	NA
18169	g8608	-0.220417	0	NoEnrichment	NA
1817	g7341	-0.285068	0	NoEnrichment	NA
18180	g8611	-0.325931	0	NoEnrichment	NA
18187	g8612	-0.243086	0	NoEnrichment	NA
18220	g32577	0.85061	0.0468528	NoEnrichment	sp|P54289|CA2D1_HUMAN
18235	g32581	-0.0333482	0.00358557	NoEnrichment	sp|Q5M9G0|DCTD_RAT
18241	g32582	-0.159374	-0.286449	NoEnrichment	sp|Q1W617|SHRM4_MOUSE
18259	g32585	0.362235	-0.348468	NoEnrichment	sp|Q9Z125|CR3L1_MOUSE
18287	NA	0.000579406	0	NoEnrichment	NA
18293	g15773	0.272801	0	NoEnrichment	NA
18296	g15773	0.0429353	0	NoEnrichment	NA
18301	g15773	-0.0664401	0	NoEnrichment	NA
18307	g15774	1.12636	-0.0326968	NoEnrichment	sp|P51577|P2RX4_RAT
18347	g15789	0.0753562	0.0137089	NoEnrichment	sp|P22182|FGFR1_XENLA
1835	g10556	-0.512728	-0.00101334	NoEnrichment	sp|P49010|HEXC_BOMMO
18380	g26099	-0.372311	0	NoEnrichment	NA
18384	g26100	-0.0351215	0	NoEnrichment	sp|P22031|LEG_HELCR
18387	g26101	0.317471	0	NoEnrichment	NA
18412	g26106	0.121104	0.0468921	NoEnrichment	sp|Q5R9H4|A1CF_PONAB
18414	g26107	-0.0603692	-0.071867	NoEnrichment	sp|Q9BQS2|SYT15_HUMAN
18422	g26110	-0.061299	0	NoEnrichment	NA
18436	g26119	-0.0252095	0.00343723	NoEnrichment	sp|D2HWM5|RFWD3_AILME
1844	g10564	-0.456588	0	NoEnrichment	sp|O00370|LORF2_HUMAN
18441	g26120	0.481785	0.00706904	NoEnrichment	sp|P98191|CDS1_MOUSE
18449	g26122	0.227908	0	NoEnrichment	sp|C0HK24|ELEL_ECHLU
18461	g26122	1.25331	0	NoEnrichment	sp|C0HK24|ELEL_ECHLU
1850	g10565	-0.232976	0.109345	NoEnrichment	sp|Q9WVM4|ICMT_RAT
18501	g2865	0.0338761	0	NoEnrichment	NA
18516	g2870	1.58474	0	NoEnrichment	NA
18517	g2871	-0.514366	0	NoEnrichment	NA
18531	NA	-0.467859	0	NoEnrichment	NA
18576	g18030	0.0334073	0	NoEnrichment	NA
18577	g18031	0.689936	0	NoEnrichment	NA
18579	g18032	0.781183	0	NoEnrichment	NA
18589	g18035	-0.106782	0	NoEnrichment	NA
18637	g32018	0.462161	0.0500514	NoEnrichment	sp|Q24547|STX1A_DROME
18652	g13299	0.170248	0	NoEnrichment	sp|Q8CG19|LTBP1_MOUSE
18693	g5384	0.735102	0	NoEnrichment	NA
18696	g5385	-0.220821	0	NoEnrichment	NA
18723	g5391	-0.335069	0.044634	NoEnrichment	sp|Q8IY22|CMIP_HUMAN
18726	g5391	-0.268721	0.044634	NoEnrichment	sp|Q8IY22|CMIP_HUMAN
18728	g5392	-0.403254	0	NoEnrichment	NA
18742	g5395	2.04759	-0.00696565	NoEnrichment	sp|P52164|MAX_RAT
18756	g5398	-0.00605547	0	NoEnrichment	NA
1876	g16741	0.620806	0	NoEnrichment	NA
1877	g16741	-0.0689499	0	NoEnrichment	NA
18786	g65	-0.474126	0	NoEnrichment	NA
18789	g65	-0.0160275	0	NoEnrichment	NA
18792	g65	-0.731706	0	NoEnrichment	NA
18814	g69	0.798679	-0.00416915	NoEnrichment	sp|O57460|TLL1_DANRE
18818	g69	0.619999	-0.00416915	NoEnrichment	sp|O57460|TLL1_DANRE
1882	g16741	0.393394	0	NoEnrichment	NA
18820	g69	-0.468054	-0.00416915	NoEnrichment	sp|O57460|TLL1_DANRE
18828	g70	0.101833	0	NoEnrichment	NA
18829	g70	1.02392	0	NoEnrichment	NA
18831	g70	0.193312	0	NoEnrichment	NA
18857	g11083	-0.37241	0	NoEnrichment	NA
18870	g11088	0.289717	0	NoEnrichment	NA
189	g18917	0.429847	0.0509509	NoEnrichment	sp|Q16827|PTPRO_HUMAN
1890	g16742	-0.161112	0	NoEnrichment	NA
18907	g11095	-0.615901	0.0370561	NoEnrichment	sp|P97494|GSH1_MOUSE
18909	g11095	-0.408599	0.0370561	NoEnrichment	sp|P97494|GSH1_MOUSE
1892	g16743	-0.0920959	0	NoEnrichment	NA
18948	g25443	-0.491312	0	NoEnrichment	NA
18963	g25451	0.307028	0	NoEnrichment	NA
18968	g25452	-0.153735	0	NoEnrichment	sp|B5XCB8|THAP1_SALSA
18970	g25453	-0.237705	0	NoEnrichment	NA
18980	g25478	-0.343558	0	NoEnrichment	NA
19062	g25501	-0.485924	0	NoEnrichment	NA
19172	g2514	-0.661618	0	NoEnrichment	sp|D3ZEH5|SIDT2_RAT
19186	g6782	-0.0724006	0	NoEnrichment	NA
19262	g13566	-0.136176	0	NoEnrichment	NA
19266	g13566	0.476023	0	NoEnrichment	NA
19297	g13572	-0.0528358	0	NoEnrichment	NA
19319	g16876	0.254122	-0.00278011	NoEnrichment	sp|A7RU46|NAPA_NEMVE
19321	g16876	0.131926	-0.00278011	NoEnrichment	sp|A7RU46|NAPA_NEMVE
19346	g16882	1.36274	0	NoEnrichment	NA
19353	g16887	-0.163835	0	NoEnrichment	NA
19359	g16890	-0.581872	0	NoEnrichment	NA
19392	g16905	0.171996	0.0238361	NoEnrichment	sp|A7SVT1|FICD_NEMVE
19396	g16906	-0.18937	-0.0091225	NoEnrichment	sp|B3EWZ6|MLRP2_ACRMI
19413	g16907	-0.53551	-0.00774447	NoEnrichment	sp|B3EWZ6|MLRP2_ACRMI
19476	g21983	-0.551457	0.339354	NoEnrichment	sp|Q5XI73|GDIR1_RAT
19483	g21983	0.0828345	0.339354	NoEnrichment	sp|Q5XI73|GDIR1_RAT
19493	g21989	-0.0254077	-0.109198	NoEnrichment	sp|A7SDW5|EIF3L_NEMVE
19495	g21990	0.171782	0.0681788	NoEnrichment	sp|Q4G0X9|CCD40_HUMAN
19508	g21993	0.783684	1.3833	NoEnrichment	sp|P24733|MYS_ARGIR
19522	g21995	-0.808983	1.31927	NoEnrichment	sp|Q05000|MYS_PODCA
19540	g15762	-0.677057	0	NoEnrichment	sp|Q6P3X8|PGBD2_HUMAN
19541	g15762	-0.217309	0	NoEnrichment	sp|Q6P3X8|PGBD2_HUMAN
19543	g15763	-0.942077	0	NoEnrichment	NA
19544	g15763	-0.364918	0	NoEnrichment	NA
19567	g13795	0.0926559	0.00245441	NoEnrichment	sp|Q90Y57|JAG1A_DANRE
19602	g13799	0.757782	0	NoEnrichment	NA
19603	g13799	0.73333	0	NoEnrichment	NA
19605	g13799	0.252404	0	NoEnrichment	NA
19630	g13803	1.21011	-0.00713208	NoEnrichment	sp|Q6ING7|FLAD1_XENLA
19668	g13813	0.105633	-0.0314346	NoEnrichment	sp|Q6PZ02|ATG4B_CHICK
19669	g13813	0.385241	-0.0314346	NoEnrichment	sp|Q6PZ02|ATG4B_CHICK
19685	g13823	-0.254537	0	NoEnrichment	NA
19703	g4074	-0.178197	-0.263204	NoEnrichment	sp|P29694|EF1G_RABIT
19732	g4084	0.384711	-0.0288542	NoEnrichment	sp|Q9QZC7|PKHB2_MOUSE
19748	g4091	-0.030866	-0.000391117	NoEnrichment	sp|Q8NB59|SYT14_HUMAN
19749	g4091	-0.0916638	-0.000391117	NoEnrichment	sp|Q8NB59|SYT14_HUMAN
1975	g30824	-0.328106	0	NoEnrichment	sp|Q08DK7|MCATL_BOVIN
19781	g4112	0.434656	-0.0124385	NoEnrichment	sp|P37285|KLC1_RAT
19802	g4117	-0.232439	0.00830399	NoEnrichment	sp|Q07817|B2CL1_HUMAN
19819	g23620	0.208291	-0.279223	NoEnrichment	sp|P61315|G3ST3_MOUSE
19823	g23620	-0.0295824	-0.279223	NoEnrichment	sp|P61315|G3ST3_MOUSE
19847	g23635	-0.334723	0	NoEnrichment	NA
19883	g8887	-0.576997	0	NoEnrichment	NA
19896	NA	0.32642	0	NoEnrichment	NA
19899	NA	-0.0415016	0	NoEnrichment	NA
19923	g2672	1.14767	0	NoEnrichment	NA
19946	g14016	0.546138	0	NoEnrichment	NA
19949	g14016	-0.506724	0	NoEnrichment	NA
19950	g14016	0.316591	0	NoEnrichment	NA
19951	g14017	0.861322	0	NoEnrichment	NA
19954	g14017	0.764471	0	NoEnrichment	NA
19957	g14018	-0.401594	-0.0578587	NoEnrichment	sp|Q15063|POSTN_HUMAN
19959	g14018	-0.704841	-0.0578587	NoEnrichment	sp|Q15063|POSTN_HUMAN
19970	g14025	-0.082394	-0.0137923	NoEnrichment	sp|P60670|NPL4_MOUSE
19976	g14028	0.0672595	0.352052	NoEnrichment	sp|Q5F3I6|TM104_CHICK
20027	g21930	0.177935	0	NoEnrichment	sp|Q4R3D6|ZMYM5_MACFA
2004	g30832	0.715324	0.0600536	NoEnrichment	sp|Q3TPX4|EXOC5_MOUSE
20066	g7733	-0.18687	0	NoEnrichment	NA
2008	g30834	0.723309	0.0570819	NoEnrichment	sp|O75582|KS6A5_HUMAN
20098	g7738	0.982069	0	NoEnrichment	NA
20106	g7740	-0.0827276	0	NoEnrichment	sp|Q1ZZH1|GRM3_MACFA
20108	g10582	0.232176	0	NoEnrichment	NA
20137	g10585	0.507758	0	NoEnrichment	sp|Q8IZJ1|UNC5B_HUMAN
20139	g10585	1.44426	0	NoEnrichment	sp|Q8IZJ1|UNC5B_HUMAN
20147	g10586	-0.0713551	0.00512589	NoEnrichment	sp|Q96DM1|PGBD4_HUMAN
20150	g10587	-0.220462	0	NoEnrichment	NA
20152	g10588	0.488983	-0.0186886	NoEnrichment	sp|Q9V785|3BP5H_DROME
20153	g10588	-0.224815	-0.0186886	NoEnrichment	sp|Q9V785|3BP5H_DROME
20156	g10588	-0.269767	-0.0186886	NoEnrichment	sp|Q9V785|3BP5H_DROME
20184	g10593	0.118675	0	NoEnrichment	sp|Q6AZB8|HARB1_DANRE
20216	g10600	0.00923982	0	NoEnrichment	NA
20219	g10604	-0.230398	0.535559	NoEnrichment	sp|P49715|CEBPA_HUMAN
20220	g10604	-0.170926	0.535559	NoEnrichment	sp|P49715|CEBPA_HUMAN
20222	g10604	-0.423967	0.535559	NoEnrichment	sp|P49715|CEBPA_HUMAN
20282	NA	0.48085	0	NoEnrichment	NA
203	g18921	0.672734	7.75305e-05	NoEnrichment	sp|Q9YGW7|DAZL_DANRE
20315	g7861	-0.158339	0	NoEnrichment	NA
20316	g7862	0.454504	0	NoEnrichment	NA
20319	g7863	0.555012	0.276628	NoEnrichment	sp|Q66HA4|TAXB1_RAT
20321	g7863	0.400523	0.276628	NoEnrichment	sp|Q66HA4|TAXB1_RAT
20346	g7872	-0.654813	-0.0221337	NoEnrichment	sp|Q8R4V5|OIT3_MOUSE
20366	g9459	0.165392	0	NoEnrichment	sp|Q7Z3K3|POGZ_HUMAN
20391	g1262	-0.202053	0	NoEnrichment	NA
20397	g1266	-0.2421	-0.0162236	NoEnrichment	sp|O16025|AOSL_PLEHO
20430	g8456	-0.029319	-0.0306624	NoEnrichment	sp|Q9YHY6|CND1_XENLA
20448	g8460	0.504867	0	NoEnrichment	sp|Q9UIF8|BAZ2B_HUMAN
20479	g8468	0.268172	0.0437817	NoEnrichment	sp|P80003|PA2A2_HELSU
20486	g8471	0.434024	0	NoEnrichment	NA
20509	g8475	1.06863	0.0232691	NoEnrichment	sp|Q5F485|DDX42_CHICK
20517	g8476	-0.338085	-0.0108597	NoEnrichment	sp|A6NN14|ZN729_HUMAN
20553	g8496	0.274865	0.0513959	NoEnrichment	sp|Q5XIN3|MIPT3_RAT
20563	g8497	-0.746151	0.190944	NoEnrichment	sp|O42350|CO1A2_LITCT
20564	g8497	-0.665404	0.190944	NoEnrichment	sp|O42350|CO1A2_LITCT
20565	g8497	-0.902374	0.190944	NoEnrichment	sp|O42350|CO1A2_LITCT
20566	g8497	0.115139	0.190944	NoEnrichment	sp|O42350|CO1A2_LITCT
20579	g8503	0.167203	0	NoEnrichment	NA
2060	g308	0.0131757	0.00347743	NoEnrichment	sp|O00222|GRM8_HUMAN
2061	g308	-0.354937	0.00347743	NoEnrichment	sp|O00222|GRM8_HUMAN
20663	g2057	-0.177074	0	NoEnrichment	NA
20664	g2057	-0.50287	0	NoEnrichment	NA
20683	g13882	1.03504	0	NoEnrichment	NA
20699	g25544	0.846913	0	NoEnrichment	NA
20705	g25546	-0.0482694	0	NoEnrichment	NA
20708	g25548	0.0867662	0	NoEnrichment	NA
20719	g25554	-0.170742	0	NoEnrichment	sp|O60291|MGRN1_HUMAN
20727	g25556	-0.0645317	0.162561	NoEnrichment	sp|A7E2S9|A30BL_HUMAN
20729	g25556	0.427069	0.162561	NoEnrichment	sp|A7E2S9|A30BL_HUMAN
20736	g25557	-0.199955	-0.00727184	NoEnrichment	sp|Q9H1Y3|OPN3_HUMAN
20747	g25563	-0.255331	-0.0424588	NoEnrichment	sp|Q5RFR8|COPE_PONAB
20753	g25564	-0.12343	0	NoEnrichment	NA
20755	g25565	-0.134706	0.0112665	NoEnrichment	sp|Q8AVY1|ODF3A_XENLA
20756	g25565	-0.551147	0.0112665	NoEnrichment	sp|Q8AVY1|ODF3A_XENLA
20757	g25566	0.0375105	0.0235888	NoEnrichment	sp|Q5U4Z8|RM20_XENLA
2076	g312	-0.139072	-0.0912001	NoEnrichment	sp|Q4R8Z2|RL13A_MACFA
20789	g25574	0.606699	0	NoEnrichment	NA
20819	g25579	2.31712	0	NoEnrichment	NA
20855	g25587	0.433135	0	NoEnrichment	NA
20901	g12915	0.00434538	-0.0566221	NoEnrichment	sp|O45818|DKF2_CAEEL
20911	g12918	0.0395767	0	NoEnrichment	NA
20919	g12926	-0.284901	0	NoEnrichment	NA
20920	g12927	-0.149137	0	NoEnrichment	NA
20960	g12939	0.095124	0.00977846	NoEnrichment	sp|Q3UZD5|PRDM6_MOUSE
20997	g12944	-0.0850522	-0.00386134	NoEnrichment	sp|Q7Z494|NPHP3_HUMAN
21000	g12945	-0.395682	0	NoEnrichment	NA
21007	g12945	0.135875	0	NoEnrichment	NA
21025	g12949	-0.362887	0.347173	NoEnrichment	sp|Q8NHV1|GIMA7_HUMAN
21084	g5147	0.884204	0	NoEnrichment	NA
21086	g5147	1.66175	0	NoEnrichment	NA
21087	g5148	1.2957	0	NoEnrichment	NA
21099	g5150	0.640671	0.0492259	NoEnrichment	sp|Q12802|AKP13_HUMAN
21100	g5150	0.720169	0.0492259	NoEnrichment	sp|Q12802|AKP13_HUMAN
21104	g5150	0.568614	0.0492259	NoEnrichment	sp|Q12802|AKP13_HUMAN
21123	g5156	0.199897	-0.113256	NoEnrichment	sp|P48679|LMNA_RAT
21126	g5157	0.0427535	-0.183003	NoEnrichment	sp|A2QGR5|AMPP1_ASPNC
21160	g21719	0.720556	0	NoEnrichment	NA
21168	g21720	0.364009	-0.0445731	NoEnrichment	sp|Q28GD4|ELAV2_XENTR
21169	g21720	0.418955	-0.0445731	NoEnrichment	sp|Q28GD4|ELAV2_XENTR
2119	g321	0.580993	0	NoEnrichment	NA
21196	g21728	-0.0260657	0	NoEnrichment	NA
21228	g23844	-0.922679	0	NoEnrichment	NA
21231	g23845	0.290012	0	NoEnrichment	sp|Q17QR8|HARB1_BOVIN
21232	g23845	0.243297	0	NoEnrichment	sp|Q17QR8|HARB1_BOVIN
21237	g23846	0.132353	0.0572128	NoEnrichment	sp|Q53HC0|CCD92_HUMAN
21240	g23846	0.671803	0.0572128	NoEnrichment	sp|Q53HC0|CCD92_HUMAN
21246	g23847	0.0502286	0.144224	NoEnrichment	sp|Q2KN96|CYTSA_XENTR
21271	g23856	0.223645	0	NoEnrichment	NA
21299	g23868	1.19526	0	NoEnrichment	NA
21305	g23869	0.0358432	0	NoEnrichment	NA
21317	g23869	0.795569	0	NoEnrichment	NA
21321	g23869	0.354081	0	NoEnrichment	NA
21323	g23869	0.207412	0	NoEnrichment	NA
21367	g17928	0.430904	0	NoEnrichment	NA
2137	g324	-0.091354	0	NoEnrichment	NA
21412	g30660	-0.369949	-0.00375159	NoEnrichment	sp|Q91WL6|SNX11_MOUSE
21413	g30660	-0.536217	-0.00375159	NoEnrichment	sp|Q91WL6|SNX11_MOUSE
21417	g30661	-0.336694	0	NoEnrichment	sp|P35072|TCB1_CAEBR
2142	g324	-0.421728	0	NoEnrichment	NA
21426	g30664	-0.177557	0	NoEnrichment	sp|P21328|RTJK_DROME
21438	g30670	-0.148649	-0.000501862	NoEnrichment	sp|Q9QUP4|CHST5_MOUSE
21439	g30671	-0.212205	-0.00239916	NoEnrichment	sp|J3S6Y1|TSEAR_MOUSE
21441	g30671	-0.294366	-0.00239916	NoEnrichment	sp|J3S6Y1|TSEAR_MOUSE
21444	g30671	-0.454915	-0.00239916	NoEnrichment	sp|J3S6Y1|TSEAR_MOUSE
21467	g17459	-0.305924	0.0357365	NoEnrichment	sp|O60308|CE104_HUMAN
21470	g17459	0.506286	0.0357365	NoEnrichment	sp|O60308|CE104_HUMAN
21478	g17461	0.0577772	0	NoEnrichment	NA
21492	g17462	-0.0129851	0	NoEnrichment	NA
21525	g17468	0.77813	0	NoEnrichment	NA
21568	g20712	0.626675	0.147661	NoEnrichment	sp|Q9M0A6|GGP2_ARATH
21570	g20712	0.759424	0.147661	NoEnrichment	sp|Q9M0A6|GGP2_ARATH
21572	g20713	-0.408317	0.0166362	NoEnrichment	sp|Q3A258|RIMK_PELCD
21596	g20723	0.319858	0	NoEnrichment	NA
21628	g20728	-0.0669804	0	NoEnrichment	sp|P22897|MRC1_HUMAN
21630	g20728	-0.195439	0	NoEnrichment	sp|P22897|MRC1_HUMAN
21643	g20735	0.211272	0	NoEnrichment	sp|P35546|RET_MOUSE
21679	g13741	0.186926	0.00178328	NoEnrichment	sp|Q27433|MEC2_CAEEL
21694	g28429	2.01605	0	NoEnrichment	NA
21695	g28429	0.553065	0	NoEnrichment	NA
217	g18923	-0.47465	0	NoEnrichment	NA
21701	g28430	-0.472728	0	NoEnrichment	NA
21710	g28434	0.769103	0	NoEnrichment	sp|P35072|TCB1_CAEBR
21711	g28434	0.196394	0	NoEnrichment	sp|P35072|TCB1_CAEBR
21750	g33034	0.32799	0	NoEnrichment	NA
21754	g33033	-0.499813	0.0420513	NoEnrichment	sp|Q66HB3|IFT80_RAT
21759	g33035	0.501226	-0.0578686	NoEnrichment	sp|Q922R0|PRKX_MOUSE
21772	g33040	0.0768349	0	NoEnrichment	sp|Q6AZB8|HARB1_DANRE
218	g18923	-0.203379	0	NoEnrichment	NA
2182	g334	0.154792	-0.00639748	NoEnrichment	sp|Q9BUZ4|TRAF4_HUMAN
2183	g334	0.237772	-0.00639748	NoEnrichment	sp|Q9BUZ4|TRAF4_HUMAN
21830	g9992	0.899209	0	NoEnrichment	NA
21833	g9992	0.822913	0	NoEnrichment	NA
21837	g9993	0.250339	0	NoEnrichment	NA
21838	g9993	1.23199	0	NoEnrichment	NA
21842	g9994	0.291473	0.517638	NoEnrichment	sp|Q2W2L2|RS11_MAGSA
21843	g9994	3.33828	0.517638	Head	sp|Q2W2L2|RS11_MAGSA
21845	g9994	3.86031	0.517638	Head	sp|Q2W2L2|RS11_MAGSA
21846	g9994	1.17701	0.517638	Head	sp|Q2W2L2|RS11_MAGSA
21847	g9994	1.2628	0.517638	Head	sp|Q2W2L2|RS11_MAGSA
2185	g334	-0.136934	-0.00639748	NoEnrichment	sp|Q9BUZ4|TRAF4_HUMAN
21855	g9999	-0.0489615	0	NoEnrichment	NA
21890	g10014	-0.0983345	-0.0797915	NoEnrichment	sp|P55199|ELL_HUMAN
21898	g10016	0.346408	0	NoEnrichment	NA
21906	g10018	-0.504747	0.162374	NoEnrichment	sp|Q4I963|COFI_GIBZE
21912	g10020	-0.306341	0.0314296	NoEnrichment	sp|P70057|KCNQ1_XENLA
21967	g10041	-0.139224	0.0336052	NoEnrichment	sp|Q90YM8|CYFP1_DANRE
21999	g10050	0.412485	0.0023463	NoEnrichment	sp|A7SBF0|INT9_NEMVE
22003	g10051	0.122991	0.0446729	NoEnrichment	sp|A1L2P5|HXD3_XENLA
22025	g10055	-0.0904314	0	NoEnrichment	NA
22026	g10055	0.419947	0	NoEnrichment	NA
22030	g10055	0.162009	0	NoEnrichment	NA
22051	g10067	-0.243104	0	NoEnrichment	NA
22063	g10077	0.736862	0.121785	NoEnrichment	sp|Q96MF2|STAC3_HUMAN
22065	g10077	0.353902	0.121785	NoEnrichment	sp|Q96MF2|STAC3_HUMAN
22085	g10084	0.0949252	0.0454059	NoEnrichment	sp|P27448|MARK3_HUMAN
22102	g10088	-0.155482	0.00835328	NoEnrichment	sp|Q9HAV4|XPO5_HUMAN
22151	g10106	-0.35582	-0.00772204	NoEnrichment	sp|Q96PZ7|CSMD1_HUMAN
22153	g10106	-0.42895	-0.00772204	NoEnrichment	sp|Q96PZ7|CSMD1_HUMAN
22155	g10106	-0.294005	-0.00772204	NoEnrichment	sp|Q96PZ7|CSMD1_HUMAN
22239	g33693	-0.929952	0.188331	NoEnrichment	sp|P18428|LBP_HUMAN
22252	g33693	1.05881	0.188331	NoEnrichment	sp|P18428|LBP_HUMAN
22265	g33695	-0.323514	0	NoEnrichment	sp|Q8WW52|F151A_HUMAN
22273	g33697	0.590442	0	NoEnrichment	sp|Q12767|TMM94_HUMAN
22305	g33712	0.432635	0	NoEnrichment	NA
22308	g33712	1.02981	0	NoEnrichment	NA
22312	g33712	0.764217	0	NoEnrichment	NA
22313	g33712	0.5677	0	NoEnrichment	NA
22314	g33713	0.409387	0	NoEnrichment	NA
22316	g33714	-0.162653	0.184186	NoEnrichment	sp|Q9P2F6|RHG20_HUMAN
22318	g33715	0.263749	0	NoEnrichment	NA
22336	g33718	0.549855	0.0269609	NoEnrichment	sp|Q9D361|SNR48_MOUSE
22373	g31976	0.924248	-0.000770198	NoEnrichment	sp|P22781|DDC_CAVPO
22374	g31976	0.887356	-0.000770198	NoEnrichment	sp|P22781|DDC_CAVPO
22379	g31978	-0.0804899	0.0110847	NoEnrichment	sp|Q9VUW9|HIP14_DROME
22390	g31982	0.0126575	0.0458115	NoEnrichment	sp|Q9YHD3|BAG6A_XENLA
22391	g31982	0.175842	0.0458115	NoEnrichment	sp|Q9YHD3|BAG6A_XENLA
22392	g31982	0.0552262	0.0458115	NoEnrichment	sp|Q9YHD3|BAG6A_XENLA
22393	g31982	1.06119	0.0458115	NoEnrichment	sp|Q9YHD3|BAG6A_XENLA
22456	g26540	-0.285766	0	NoEnrichment	sp|Q6R2W3|SCND3_HUMAN
22471	g21461	-1.58761	0	NoEnrichment	NA
2248	g371	0.681145	0.304022	NoEnrichment	sp|Q9GM70|ST17A_RABIT
2249	g371	-0.62494	0.304022	NoEnrichment	sp|Q9GM70|ST17A_RABIT
2251	g371	-0.268464	0.304022	NoEnrichment	sp|Q9GM70|ST17A_RABIT
22528	g26466	0.0551471	0.211548	NoEnrichment	sp|Q92058|PPBT_CHICK
22585	g4288	0.896927	0.019285	NoEnrichment	sp|A7RRG3|AKTIP_NEMVE
22597	g4292	0.107264	0	NoEnrichment	NA
2260	g374	0.183267	0	NoEnrichment	NA
22631	g11186	0.200137	0	NoEnrichment	NA
2266	g376	-0.290964	0	NoEnrichment	NA
22670	g11205	-0.220752	0.0127765	NoEnrichment	sp|Q09470|KCNA1_HUMAN
22700	g11211	0.207688	0	NoEnrichment	sp|Q95SX7|RTBS_DROME
22724	g11219	-0.40319	0.037209	NoEnrichment	sp|Q6NWD4|TIM50_DANRE
22731	g11219	-0.0251391	0.037209	NoEnrichment	sp|Q6NWD4|TIM50_DANRE
22741	g29101	-0.180629	0.00292179	NoEnrichment	sp|P79282|FUT8_PIG
22742	g29101	0.125893	0.00292179	NoEnrichment	sp|P79282|FUT8_PIG
22743	g29101	-0.228609	0.00292179	NoEnrichment	sp|P79282|FUT8_PIG
22754	g29105	-0.332207	-0.00922414	NoEnrichment	sp|Q5U3U0|PHYD1_DANRE
22765	g29109	0.211026	-0.00123798	NoEnrichment	sp|O60921|HUS1_HUMAN
22772	g29113	0.472544	-0.0014579	NoEnrichment	sp|A1DWM3|MFSD6_PIG
22800	g29124	-0.0998914	0.16079	NoEnrichment	sp|Q96B97|SH3K1_HUMAN
22804	g29124	0.846183	0.16079	NoEnrichment	sp|Q96B97|SH3K1_HUMAN
22814	g29128	0.104498	0.0457235	NoEnrichment	sp|Q502I6|NB5R4_DANRE
22816	g29129	0.47724	0	NoEnrichment	NA
22820	g29129	0.798584	0	NoEnrichment	NA
22842	g29131	-0.160712	0	NoEnrichment	NA
22850	g29132	0.704292	-0.00200209	NoEnrichment	sp|Q9Y6P5|SESN1_HUMAN
22861	g29132	0.0352356	-0.00200209	NoEnrichment	sp|Q9Y6P5|SESN1_HUMAN
22891	g29135	-0.261603	0	NoEnrichment	NA
2290	g387	-0.175502	-0.0270214	NoEnrichment	sp|Q9VXN0|GTDC1_DROME
22900	g29138	-0.400001	0	NoEnrichment	NA
22934	g29153	0.149696	0.0191942	NoEnrichment	sp|Q99LZ3|SLD5_MOUSE
2294	g387	0.875598	-0.0270214	NoEnrichment	sp|Q9VXN0|GTDC1_DROME
22944	g29155	0.432373	0	NoEnrichment	NA
22956	g29159	-0.0722328	0.406152	NoEnrichment	sp|P55196|AFAD_HUMAN
22957	g29159	0.20478	0.406152	NoEnrichment	sp|P55196|AFAD_HUMAN
22986	g29162	0.580303	0	NoEnrichment	NA
22996	g29164	-0.152255	0	NoEnrichment	NA
2300	g388	-0.100696	0	NoEnrichment	NA
23039	g15814	0.415251	0	NoEnrichment	NA
2305	g388	-0.277561	0	NoEnrichment	NA
23086	g15825	0.0760282	0.344608	NoEnrichment	sp|P41823|SY65_APLCA
23091	g15826	-0.636394	-0.131345	NoEnrichment	sp|Q16659|MK06_HUMAN
23094	g15826	-0.246837	-0.131345	NoEnrichment	sp|Q16659|MK06_HUMAN
23095	g15827	0.406133	0	NoEnrichment	NA
23108	g15830	0.467653	-0.0902778	NoEnrichment	sp|Q5RDG4|PDIA3_PONAB
23109	g15830	0.242491	-0.0902778	NoEnrichment	sp|Q5RDG4|PDIA3_PONAB
23127	g15839	-0.202249	-0.00214196	NoEnrichment	sp|Q9D305|THAP2_MOUSE
23129	g15840	-0.383641	0	NoEnrichment	sp|Q29H56|MAB21_DROPS
23160	g15856	-0.188919	0	NoEnrichment	NA
2318	g389	0.142278	-0.004183	NoEnrichment	sp|Q5FVN8|WSDU1_RAT
23181	g15863	-0.0890147	-0.00975748	NoEnrichment	sp|Q9WUK7|OPN3_MOUSE
23185	g15864	-0.096317	0	NoEnrichment	sp|G2K3G6|INLA_LISM4
23214	g15881	-0.129917	0.00442805	NoEnrichment	sp|Q06725|N2F1A_DANRE
23215	g15881	0.261754	0.00442805	NoEnrichment	sp|Q06725|N2F1A_DANRE
23217	g15881	-0.0193096	0.00442805	NoEnrichment	sp|Q06725|N2F1A_DANRE
23218	g15881	-0.153421	0.00442805	NoEnrichment	sp|Q06725|N2F1A_DANRE
23220	g15882	0.260785	-0.0944429	NoEnrichment	sp|Q9Z1N9|UN13B_MOUSE
23241	g15883	0.06405	-0.00150189	NoEnrichment	sp|Q9UPW8|UN13A_HUMAN
23242	g15883	0.144831	-0.00150189	NoEnrichment	sp|Q9UPW8|UN13A_HUMAN
23248	g15884	0.984077	0	NoEnrichment	NA
23249	g15884	-0.00972135	0	NoEnrichment	NA
23252	g15884	0.0821911	0	NoEnrichment	NA
23254	g15885	0.606566	0.0103837	NoEnrichment	sp|Q15751|HERC1_HUMAN
23260	g15893	0.164299	0	NoEnrichment	NA
23263	g15894	0.0525694	0.321289	NoEnrichment	sp|B5ZYI7|DUT_RHILW
23273	g15896	0.208652	0	NoEnrichment	sp|Q25460|FP1_MYTED
2328	g391	-0.712166	0	NoEnrichment	NA
23282	g15898	0.0972086	0	NoEnrichment	NA
23288	g15899	0.154601	0.00463094	NoEnrichment	sp|Q9W6A8|OP1S2_DANRE
23289	g15899	0.117997	0.00463094	NoEnrichment	sp|Q9W6A8|OP1S2_DANRE
23292	g15900	0.0838859	0	NoEnrichment	sp|Q6AZB8|HARB1_DANRE
23295	g15901	0.0495107	0	NoEnrichment	NA
23299	g15903	-0.339091	0	NoEnrichment	sp|P21329|RTJK_DROFU
23312	g15906	-0.115553	0.0714247	NoEnrichment	sp|P13804|ETFA_HUMAN
23315	g15907	-1.19831	0.396331	NoEnrichment	sp|O43581|SYT7_HUMAN
23316	g15907	-0.0723083	0.396331	NoEnrichment	sp|O43581|SYT7_HUMAN
23330	g15911	-0.108727	0.0849273	NoEnrichment	sp|Q3SZ27|MIC27_BOVIN
23334	g15913	1.09731	-0.0257083	NoEnrichment	sp|Q63ZI0|KCNK9_XENLA
23358	g7335	-0.901905	0.0494036	NoEnrichment	sp|Q3SYS6|CHP1_BOVIN
23371	g9006	0.726109	0	NoEnrichment	NA
2338	g395	-0.122115	0	NoEnrichment	NA
23407	g9024	-0.569995	0	NoEnrichment	NA
23411	NA	0.819387	0	NoEnrichment	NA
23448	g30805	0.438427	0	NoEnrichment	NA
23449	g30805	0.046822	0	NoEnrichment	NA
23457	g30809	0.891136	0	NoEnrichment	NA
23478	g31477	0.0707737	-0.078477	NoEnrichment	sp|P17972|KCNAW_DROME
23495	g31478	-0.0894991	0	NoEnrichment	NA
23503	g21254	-0.716916	0	NoEnrichment	sp|A0A0R4IBK5|R213A_DANRE
23525	g6062	-0.698922	0.00261257	NoEnrichment	sp|P0C6B8|SVEP1_RAT
23530	g6062	0.190055	0.00261257	NoEnrichment	sp|P0C6B8|SVEP1_RAT
23542	g6065	0.500254	0	NoEnrichment	sp|C3YWU0|FUCO_BRAFL
23544	g6065	0.269104	0	NoEnrichment	sp|C3YWU0|FUCO_BRAFL
2355	g15000	-0.23741	0	NoEnrichment	sp|Q6IYF9|SUCR1_RAT
23550	g6065	-0.134596	0	NoEnrichment	sp|C3YWU0|FUCO_BRAFL
23562	g6067	0.0876957	0	NoEnrichment	NA
23591	g1576	0.218979	-0.0371202	NoEnrichment	sp|Q64487|PTPRD_MOUSE
23614	g1591	0.581936	0.888835	NoEnrichment	sp|Q01973|ROR1_HUMAN
23615	g1591	0.79177	0.888835	Head	sp|Q01973|ROR1_HUMAN
23616	g1591	0.406546	0.888835	NoEnrichment	sp|Q01973|ROR1_HUMAN
23626	g1595	-0.374549	-0.00338261	NoEnrichment	sp|Q68J47|OPSD_LOXAF
23683	g1603	0.377028	-0.049181	NoEnrichment	sp|P55809|SCOT1_HUMAN
23684	g1603	0.284261	-0.049181	NoEnrichment	sp|P55809|SCOT1_HUMAN
23723	g1609	-0.558705	0	NoEnrichment	sp|P21328|RTJK_DROME
23755	g1616	1.01837	0.000468073	NoEnrichment	sp|O57422|OPN4B_XENLA
23756	g1616	0.354885	0.000468073	NoEnrichment	sp|O57422|OPN4B_XENLA
23790	g1624	0.232923	0.222024	NoEnrichment	sp|Q61115|PTC1_MOUSE
23806	g1627	0.389126	0.0847416	NoEnrichment	sp|Q4ADK4|CFDP1_MUNRE
23808	g1627	-0.71064	0.0847416	NoEnrichment	sp|Q4ADK4|CFDP1_MUNRE
23871	g23177	0.676021	-0.00729329	NoEnrichment	sp|P70255|NFIC_MOUSE
23872	g23177	0.771645	-0.00729329	NoEnrichment	sp|P70255|NFIC_MOUSE
23873	g23177	0.373423	-0.00729329	NoEnrichment	sp|P70255|NFIC_MOUSE
23874	g23177	0.660948	-0.00729329	NoEnrichment	sp|P70255|NFIC_MOUSE
23875	g23177	0.964057	-0.00729329	NoEnrichment	sp|P70255|NFIC_MOUSE
23876	g23177	1.32633	-0.00729329	NoEnrichment	sp|P70255|NFIC_MOUSE
23877	g23177	-0.400679	-0.00729329	NoEnrichment	sp|P70255|NFIC_MOUSE
23943	g27513	-0.115913	0	NoEnrichment	NA
23966	NA	-0.80278	0	NoEnrichment	NA
23973	g32974	-0.606254	0	NoEnrichment	sp|Q7JQ07|MOS1T_DROMA
23983	g32977	-0.263817	0	NoEnrichment	NA
23989	g32979	-0.281435	0	NoEnrichment	sp|P10394|POL4_DROME
23991	g32979	-0.525639	0	NoEnrichment	sp|P10394|POL4_DROME
24019	g32989	0.0847642	0.0396011	NoEnrichment	sp|P48147|PPCE_HUMAN
2402	g15023	0.0413478	-0.00240176	NoEnrichment	sp|O75146|HIP1R_HUMAN
24027	g32989	0.251791	0.0396011	NoEnrichment	sp|P48147|PPCE_HUMAN
24030	g32989	0.157682	0.0396011	NoEnrichment	sp|P48147|PPCE_HUMAN
24033	g32990	0.637944	0	NoEnrichment	NA
24034	g32990	0.277266	0	NoEnrichment	NA
24043	g32991	0.382844	0.0138406	NoEnrichment	sp|Q9Y6I9|TX264_HUMAN
24045	g32992	-0.285237	0	NoEnrichment	NA
24057	g32996	-0.362263	-0.000745255	NoEnrichment	sp|Q8WP23|BOLL_MACFA
24108	g33019	-0.136621	0	NoEnrichment	NA
2414	g15025	-0.181248	0.000165666	NoEnrichment	sp|O75146|HIP1R_HUMAN
24144	g25394	-0.144559	-0.00436239	NoEnrichment	sp|Q9FT51|AB27G_ARATH
2415	g15025	0.126252	0.000165666	NoEnrichment	sp|O75146|HIP1R_HUMAN
2416	g15026	0.000339989	0	NoEnrichment	NA
24182	g12066	-0.2698	0	NoEnrichment	NA
24184	g26195	0.310953	0	NoEnrichment	NA
24186	g11774	-0.32234	-0.0189734	NoEnrichment	sp|Q7ZU45|TTC25_DANRE
24195	g11780	-0.799242	-0.117803	NoEnrichment	sp|Q62445|SP4_MOUSE
24196	g11780	-0.598084	-0.117803	NoEnrichment	sp|Q62445|SP4_MOUSE
24225	g11794	-0.179842	0.019006	NoEnrichment	sp|Q9NBX4|RTXE_DROME
24236	g11799	0.239619	0.0233914	NoEnrichment	sp|O73606|KCNG2_CHICK
24250	g11799	-0.157053	0.0233914	NoEnrichment	sp|O73606|KCNG2_CHICK
24254	g11800	0.20847	0	NoEnrichment	NA
24284	g11810	1.43822	0	NoEnrichment	sp|Q8R3S2|TSN33_MOUSE
24285	g11810	0.241078	0	NoEnrichment	sp|Q8R3S2|TSN33_MOUSE
2430	g15033	0.384438	-0.00982048	NoEnrichment	sp|Q02040|AK17A_HUMAN
24303	g11827	-0.0845091	0	NoEnrichment	NA
24367	g11860	-0.313586	0	NoEnrichment	NA
24368	g11860	-0.121723	0	NoEnrichment	NA
24391	g11868	0.252342	0	NoEnrichment	NA
24393	g11868	0.664665	0	NoEnrichment	NA
24399	g11868	-0.339986	0	NoEnrichment	NA
24411	g11871	0.131511	0	NoEnrichment	NA
24415	g11873	-0.314983	-0.00845228	NoEnrichment	sp|A7S4N4|SERIC_NEMVE
2448	g15041	0.271123	0.0107855	NoEnrichment	sp|Q6DDL7|UN93A_XENLA
24490	g1275	0.824118	0.193333	NoEnrichment	sp|P27918|PROP_HUMAN
24527	g1278	0.940377	0	NoEnrichment	NA
24552	g14127	-0.126834	0	NoEnrichment	NA
24596	g6382	0.675714	0.037914	NoEnrichment	sp|Q19269|NAS14_CAEEL
24612	g6386	-0.3304	0	NoEnrichment	NA
24640	g31517	0.559184	0.619001	NoEnrichment	sp|Q96RW7|HMCN1_HUMAN
24644	g31517	1.40906	0.619001	NoEnrichment	sp|Q96RW7|HMCN1_HUMAN
24647	g31517	0.387936	0.619001	NoEnrichment	sp|Q96RW7|HMCN1_HUMAN
2465	g15047	-0.651655	0	NoEnrichment	NA
24680	g31523	-0.116069	0.0146309	NoEnrichment	sp|A3KN83|SBNO1_HUMAN
24700	g31543	0.185517	-0.010285	NoEnrichment	sp|A3KCL7|OXDD_PIG
24721	g31546	-0.305956	0	NoEnrichment	NA
24729	g31549	0.132073	-0.00433077	NoEnrichment	sp|Q3EAQ5|PTR36_ARATH
24737	g31551	-0.18085	0	NoEnrichment	NA
24749	g8539	-0.249382	0	NoEnrichment	NA
24768	g26000	-0.266286	0	NoEnrichment	NA
24789	g19641	-0.479546	0	NoEnrichment	NA
24793	g19642	0.102931	0	NoEnrichment	sp|Q5SVZ6|ZMYM1_HUMAN
24800	g33594	-0.365452	0.00328744	NoEnrichment	sp|Q7Z494|NPHP3_HUMAN
2481	g15052	1.0851	0	NoEnrichment	NA
24832	g23962	-0.127931	0.00784873	NoEnrichment	sp|Q7Z494|NPHP3_HUMAN
2487	g15052	0.669656	0	NoEnrichment	NA
24890	g26260	-0.193706	0	NoEnrichment	NA
24897	g26262	-0.0834091	0	NoEnrichment	NA
2491	g15054	0.406311	0.0110423	NoEnrichment	sp|Q9VYF8|COQ5_DROME
24951	g26287	-0.147133	0.0716908	NoEnrichment	sp|Q28653|2A5D_RABIT
24952	g26287	0.565054	0.0716908	NoEnrichment	sp|Q28653|2A5D_RABIT
24968	g26293	-0.103296	-0.0122966	NoEnrichment	sp|Q80U96|XPO1_RAT
24970	g26294	0.920521	0.286906	Head	sp|Q9H0J9|PAR12_HUMAN
24972	g26294	0.628981	0.286906	NoEnrichment	sp|Q9H0J9|PAR12_HUMAN
24981	g26297	0.865391	0.644967	NoEnrichment	sp|Q6VMQ6|MCAF1_HUMAN
24988	g26299	-1.16813	0.00600545	NoEnrichment	sp|Q9NR09|BIRC6_HUMAN
2499	g15060	-0.160728	0	NoEnrichment	NA
2501	g15062	0.648364	0.0897397	NoEnrichment	sp|Q9VZW5|FMAR_DROME
25017	g20582	0.132157	0.0959115	NoEnrichment	sp|Q9U943|APLP_LOCMI
25023	g20583	0.0853684	0	NoEnrichment	sp|O43422|P52K_HUMAN
25042	g20596	-0.18643	0	NoEnrichment	NA
25043	g20596	0.422469	0	NoEnrichment	NA
25064	g27042	0.190347	0	NoEnrichment	NA
25068	g27043	-0.139532	0	NoEnrichment	NA
25098	g9418	0.342063	0	NoEnrichment	NA
2513	g7609	-0.644939	0.349615	NoEnrichment	sp|Q95029|CATL_DROME
25145	g6109	0.345783	-0.0269507	NoEnrichment	sp|Q3TCT4|ENTP7_MOUSE
25152	g6116	-0.261876	0.0706287	NoEnrichment	sp|Q8WX94|NALP7_HUMAN
2517	g7619	-0.301635	0	NoEnrichment	NA
2518	g7620	-0.538084	0	NoEnrichment	NA
25197	g6131	0.253189	-0.957656	NoEnrichment	sp|O73853|CP17A_ICTPU
25198	g6131	0.295887	-0.957656	NoEnrichment	sp|O73853|CP17A_ICTPU
25199	g6131	1.40263	-0.957656	NoEnrichment	sp|O73853|CP17A_ICTPU
25200	g6131	1.12702	-0.957656	NoEnrichment	sp|O73853|CP17A_ICTPU
25201	g6131	4.94501	-0.957656	NoEnrichment	sp|O73853|CP17A_ICTPU
25206	g6132	-0.152676	0.103208	NoEnrichment	sp|O57525|CP17A_RANDY
25218	g6134	0.00308107	0	NoEnrichment	sp|Q7LHG5|YI31B_YEAST
25238	g6138	0.633331	0	NoEnrichment	NA
25241	g6139	-0.606115	0.0791824	NoEnrichment	sp|Q03350|TSP2_MOUSE
25252	g6141	-0.029697	-0.099365	NoEnrichment	sp|Q4UMH6|Y381_RICFE
25255	g6142	-0.372427	-0.0661946	NoEnrichment	sp|Q04202|TCB2_CAEBR
25286	g6155	0.48074	0.0792939	NoEnrichment	sp|P31422|GRM3_RAT
2530	g7626	0.0859483	0.132287	NoEnrichment	sp|Q40302|CALM_MACPY
25302	g6162	0.467356	-0.0292788	NoEnrichment	sp|Q6GM29|SAC1_XENLA
25306	g6163	0.300101	0	NoEnrichment	NA
25309	g6164	-0.219287	0.00639463	NoEnrichment	sp|Q9UHC6|CNTP2_HUMAN
25310	g6164	-0.278042	0.00639463	NoEnrichment	sp|Q9UHC6|CNTP2_HUMAN
25315	g6167	-0.652969	0.456808	NoEnrichment	sp|Q8BH04|PCKGM_MOUSE
25316	g6167	-0.261461	0.456808	NoEnrichment	sp|Q8BH04|PCKGM_MOUSE
25317	g6167	0.0433031	0.456808	NoEnrichment	sp|Q8BH04|PCKGM_MOUSE
25322	g6167	-0.725831	0.456808	NoEnrichment	sp|Q8BH04|PCKGM_MOUSE
25326	g6168	-0.055829	0.000771087	NoEnrichment	sp|P49263|PXN1_XENLA
25341	g6172	0.216985	0.00236451	NoEnrichment	sp|P0DOC8|CH037_DANRE
25353	g6172	0.973205	0.00236451	NoEnrichment	sp|P0DOC8|CH037_DANRE
25365	g6176	0.456285	0	NoEnrichment	NA
25366	g6176	-0.072784	0	NoEnrichment	NA
25367	g6176	0.458873	0	NoEnrichment	NA
25378	g6177	0.0672832	0	NoEnrichment	NA
2538	g7626	-0.0301519	0.132287	NoEnrichment	sp|Q40302|CALM_MACPY
254	g18934	-0.405603	-0.00256741	NoEnrichment	sp|P42892|ECE1_HUMAN
25409	g6189	0.283597	0	NoEnrichment	NA
2541	g7629	-0.117556	0.0344682	NoEnrichment	sp|Q6NYB7|RAB1A_RAT
25435	g6199	-0.154679	0	NoEnrichment	NA
2545	g7630	-0.17105	0	NoEnrichment	NA
2547	g7631	0.270386	0.0336857	NoEnrichment	sp|Q8WXF0|SRS12_HUMAN
25485	g6217	-0.120365	-0.00517898	NoEnrichment	sp|Q86VV8|RTTN_HUMAN
25490	g6217	-0.619503	-0.00517898	NoEnrichment	sp|Q86VV8|RTTN_HUMAN
25510	g6228	-0.888743	0.227374	NoEnrichment	sp|Q9U3S9|NAS6_CAEEL
25520	g25531	-0.0111622	0	NoEnrichment	NA
25541	g6706	0.364574	0	NoEnrichment	NA
25552	g6707	0.700611	0.00126041	NoEnrichment	sp|Q9UGT4|SUSD2_HUMAN
2556	g7633	-0.197356	-0.039855	NoEnrichment	sp|Q5SX19|PIGL_MOUSE
25561	g10614	-0.160084	0	NoEnrichment	NA
2559	g7634	1.06182	0.00552367	NoEnrichment	sp|Q08AW4|PKHM3_XENLA
25598	g10622	-0.119435	0.062997	NoEnrichment	sp|Q766D5|B4GN4_MOUSE
256	g18935	1.87096	0.180242	NoEnrichment	sp|P30940|5HT1F_RAT
25603	g10628	0.0813221	0	NoEnrichment	sp|P16425|Y2R2_DROME
25610	g10633	-1.37319	0	NoEnrichment	sp|P35072|TCB1_CAEBR
25630	g10648	0.560006	0.222443	NoEnrichment	sp|Q5R7P4|BGAL_PONAB
25648	g10650	1.07365	-0.0472527	NoEnrichment	sp|Q7LL04|YQK1_SCHPO
25673	g10655	-0.151355	0	NoEnrichment	NA
2569	g7639	-0.134783	-0.0889365	NoEnrichment	sp|Q6Y7W8|PERQ2_MOUSE
25708	g10675	1.16994	0	NoEnrichment	NA
25718	g10677	-0.0409734	0.00306755	NoEnrichment	sp|Q8VIG3|RSPH1_MOUSE
25725	g10680	1.24468	-1.43203	NoEnrichment	sp|H2A0N9|KCP4_PINMG
25726	g10680	0.595111	-1.43203	NoEnrichment	sp|H2A0N9|KCP4_PINMG
25727	g10680	0.600032	-1.43203	NoEnrichment	sp|H2A0N9|KCP4_PINMG
25728	g10680	0.910667	-1.43203	NoEnrichment	sp|H2A0N9|KCP4_PINMG
25748	g4990	-0.611271	0	NoEnrichment	NA
258	g18936	-0.205927	0.0638728	NoEnrichment	sp|Q80X66|BTBDA_MOUSE
25812	g3389	0.445564	0.0105367	NoEnrichment	sp|Q20191|NAS13_CAEEL
25828	g2666	0.321417	0.0456504	NoEnrichment	sp|P21677|TFE2_RAT
25832	g2666	0.214036	0.0456504	NoEnrichment	sp|P21677|TFE2_RAT
25847	g2671	-0.202602	0.133124	NoEnrichment	sp|Q9QZU7|BODG_RAT
25856	g33562	-0.132649	-0.00804426	NoEnrichment	sp|Q9N2W7|NDUAC_CAEEL
25857	g33566	-0.165037	0.00725073	NoEnrichment	sp|P41743|KPCI_HUMAN
25873	g33571	0.0202681	0	NoEnrichment	sp|Q95SX7|RTBS_DROME
2588	g7643	-0.31986	0.0245007	NoEnrichment	sp|B3EWZ8|ECT_ACRMI
25881	g33575	0.491431	0	NoEnrichment	NA
25884	g33575	0.634959	0	NoEnrichment	NA
25899	g33581	0.0979396	0	NoEnrichment	NA
25900	g33581	0.075807	0	NoEnrichment	NA
25902	g33581	-0.149545	0	NoEnrichment	NA
25908	g33584	0.459979	0.0423928	NoEnrichment	sp|Q86YV6|MYLK4_HUMAN
2591	g7646	-0.335304	0	NoEnrichment	NA
2593	g7646	0.0410147	0	NoEnrichment	NA
25938	g33590	-0.159357	0.190474	NoEnrichment	sp|Q66JA6|CAB45_XENLA
25955	g7796	0.281135	0	NoEnrichment	NA
25976	g7804	-0.77219	0	NoEnrichment	NA
25988	g7810	-0.218078	0.0844738	NoEnrichment	sp|Q9I830|KCNA2_ONCMY
25995	g7810	0.430946	0.0844738	NoEnrichment	sp|Q9I830|KCNA2_ONCMY
26011	g7815	-0.423223	0	NoEnrichment	sp|Q04202|TCB2_CAEBR
26033	g7820	-0.147831	0.104493	NoEnrichment	sp|Q8CHL0|FZD5_RAT
26037	g7820	0.507818	0.104493	NoEnrichment	sp|Q8CHL0|FZD5_RAT
26046	g7825	0.904454	-0.0171116	NoEnrichment	sp|A1A5V9|ELP5_DANRE
26055	g7827	0.1552	0	NoEnrichment	sp|Q95SX7|RTBS_DROME
26059	g7829	-0.318399	0.0991916	NoEnrichment	sp|Q6AX60|PTHB1_XENLA
26074	g7835	0.213969	0	NoEnrichment	NA
26098	g7841	-0.00303633	0	NoEnrichment	NA
26108	g7843	-0.393505	0	NoEnrichment	NA
26109	g7843	0.623101	0	NoEnrichment	NA
26119	g22851	-0.393805	0	NoEnrichment	NA
2613	g7650	-0.0863645	0	NoEnrichment	NA
26135	g22859	0.311037	0.130767	NoEnrichment	sp|B2RX14|TUT4_MOUSE
26162	g22870	0.441734	-0.814597	NoEnrichment	sp|P07314|GGT1_RAT
26164	g22870	0.635804	-0.814597	NoEnrichment	sp|P07314|GGT1_RAT
26165	g22870	-0.189767	-0.814597	NoEnrichment	sp|P07314|GGT1_RAT
26169	g22871	0.125414	0	NoEnrichment	NA
26173	g22872	0.115081	0	NoEnrichment	NA
26174	g22873	-0.155167	0	NoEnrichment	NA
26182	g22875	0.58237	0	NoEnrichment	NA
26183	g22875	0.534733	0	NoEnrichment	NA
2621	g7652	0.0616843	-0.0585668	NoEnrichment	sp|Q52KG5|KI26A_MOUSE
26211	g22879	0.0125863	-0.792292	NoEnrichment	sp|Q8WWF8|CAPSL_HUMAN
2622	g7652	0.0362708	-0.0585668	NoEnrichment	sp|Q52KG5|KI26A_MOUSE
26229	g22883	-0.56497	0	NoEnrichment	NA
2623	g7652	-0.457494	-0.0585668	NoEnrichment	sp|Q52KG5|KI26A_MOUSE
2624	g7652	0.0818188	-0.0585668	NoEnrichment	sp|Q52KG5|KI26A_MOUSE
26243	NA	0.227181	0	NoEnrichment	NA
2625	g7652	1.91514	-0.0585668	NoEnrichment	sp|Q52KG5|KI26A_MOUSE
2627	g7652	-1.08362	-0.0585668	NoEnrichment	sp|Q52KG5|KI26A_MOUSE
26279	g9269	0.33263	-0.400193	NoEnrichment	sp|Q14192|FHL2_HUMAN
26283	g9269	0.479857	-0.400193	NoEnrichment	sp|Q14192|FHL2_HUMAN
26287	g9270	-0.217873	-0.00771198	NoEnrichment	sp|A9UZ24|BCAT_MONBE
2631	g7652	-0.495321	-0.0585668	NoEnrichment	sp|Q52KG5|KI26A_MOUSE
26320	g11658	1.12995	0.214276	NoEnrichment	sp|P48727|GLC7B_CAEEL
26323	g11659	0.716869	-0.00418385	NoEnrichment	sp|Q9NQG7|HPS4_HUMAN
26330	g11659	-0.43633	-0.00418385	NoEnrichment	sp|Q9NQG7|HPS4_HUMAN
26331	g11660	0.096251	0	NoEnrichment	NA
2635	g7653	-0.396991	0	NoEnrichment	NA
26368	g11670	-0.639198	0.0347257	NoEnrichment	sp|Q4FAT7|BGLR_PIG
26385	g11692	-0.289475	0.0458	NoEnrichment	sp|Q9JJC6|RIPL1_MOUSE
26386	g11692	0.158872	0.0458	NoEnrichment	sp|Q9JJC6|RIPL1_MOUSE
26388	g11694	0.422876	0.198941	NoEnrichment	sp|P39921|TPM1_HYDVU
26390	g11694	0.105955	0.198941	NoEnrichment	sp|P39921|TPM1_HYDVU
26392	g11696	-0.141595	1.60121	NoEnrichment	sp|P39921|TPM1_HYDVU
26393	g11696	-0.312779	1.60121	NoEnrichment	sp|P39921|TPM1_HYDVU
26394	g11696	-0.385084	1.60121	NoEnrichment	sp|P39921|TPM1_HYDVU
26413	g11703	-0.36455	-0.171125	NoEnrichment	sp|Q6NW29|RWDD4_HUMAN
26427	g11711	0.613746	0	NoEnrichment	NA
26445	g15808	0.117396	-0.0157125	NoEnrichment	sp|Q3MV19|TRF6A_XENLA
26457	g25247	-0.558526	0.00794724	NoEnrichment	sp|P18915|CAH6_BOVIN
26461	g25248	0.0946103	0.00858321	NoEnrichment	sp|Q8UWA5|CAH2_TRIHK
26464	g25248	0.0112095	0.00858321	NoEnrichment	sp|Q8UWA5|CAH2_TRIHK
26482	g25252	-0.183502	0	NoEnrichment	NA
26499	g25257	0.215228	0	NoEnrichment	NA
26502	g25258	8.58198e-05	0	NoEnrichment	sp|O75132|ZBED4_HUMAN
26503	g25259	-0.392058	0.067116	NoEnrichment	sp|Q9VCA2|ORCT_DROME
26504	g25259	0.967639	0.067116	NoEnrichment	sp|Q9VCA2|ORCT_DROME
26523	g17028	-0.146764	0	NoEnrichment	NA
26541	g16603	0.221459	0	NoEnrichment	NA
26542	g16603	-0.0775191	0	NoEnrichment	NA
26552	g16606	0.248536	0	NoEnrichment	NA
26563	g16616	-0.0759046	0	NoEnrichment	NA
26569	g16616	-0.178994	0	NoEnrichment	NA
26589	g16622	-0.127157	-0.0398081	NoEnrichment	sp|Q9Y6A4|CFA20_HUMAN
26602	g16628	0.290794	-0.0260899	NoEnrichment	sp|P54846|NRL_MOUSE
26620	g16632	-0.648913	0	NoEnrichment	NA
26622	g16633	-0.341293	0.00389504	NoEnrichment	sp|B0BNA9|CNO11_RAT
26647	g16649	0.331917	-0.0492656	NoEnrichment	sp|Q95R48|OCTL_DROME
26650	g16649	0.072188	-0.0492656	NoEnrichment	sp|Q95R48|OCTL_DROME
26661	NA	-0.451632	0	NoEnrichment	NA
26664	NA	0.334849	0	NoEnrichment	NA
2667	g6719	0.538506	-0.0398812	NoEnrichment	sp|Q91ZH7|ABHD3_MOUSE
26700	g21321	-0.0273118	-0.0232272	NoEnrichment	sp|A7MB11|TGFA1_BOVIN
2672	g6720	0.390762	0	NoEnrichment	NA
26739	NA	0.203401	0	NoEnrichment	NA
26753	g26068	-0.205841	0	NoEnrichment	sp|P21329|RTJK_DROFU
26796	g26083	1.47721	-0.00404598	NoEnrichment	sp|P51399|LOX5_MESAU
26797	g26083	0.666397	-0.00404598	NoEnrichment	sp|P51399|LOX5_MESAU
26853	g16275	-0.171726	0	NoEnrichment	NA
2688	g6723	-0.236937	0	NoEnrichment	NA
26880	g16282	0.121657	-0.0813883	NoEnrichment	sp|Q2TA11|CA158_BOVIN
26900	g16288	-0.507663	0.0318547	NoEnrichment	sp|Q28H35|DAND5_XENTR
26901	g16288	-0.0517806	0.0318547	NoEnrichment	sp|Q28H35|DAND5_XENTR
26903	g16289	0.310173	0	NoEnrichment	NA
26911	g16296	0.169618	0	NoEnrichment	NA
26916	g16299	-0.434559	0.229892	NoEnrichment	sp|Q9QWG7|ST1B1_MOUSE
26922	g16299	0.259185	0.229892	NoEnrichment	sp|Q9QWG7|ST1B1_MOUSE
26932	g16302	-0.219212	0	NoEnrichment	NA
26934	g16303	1.59138	0	NoEnrichment	NA
2695	g6724	0.776887	0	NoEnrichment	NA
26967	g28512	-0.380807	0	NoEnrichment	NA
26968	g28512	-0.263692	0	NoEnrichment	NA
26971	g28512	-0.220903	0	NoEnrichment	NA
26991	g12676	-0.200673	0	NoEnrichment	NA
26997	g12681	-0.360093	0.0514126	NoEnrichment	sp|P94063|HAL3B_ARATH
27009	g12685	1.2355	0.0107674	NoEnrichment	sp|Q3U481|MFS12_MOUSE
27011	g12685	-0.393729	0.0107674	NoEnrichment	sp|Q3U481|MFS12_MOUSE
27013	g12685	-0.324194	0.0107674	NoEnrichment	sp|Q3U481|MFS12_MOUSE
27028	NA	-0.0229323	0	NoEnrichment	NA
27045	g21174	-0.595205	0.133973	NoEnrichment	sp|P43368|CAN3_PIG
27050	g21175	0.497264	0	NoEnrichment	NA
27083	NA	-0.0800892	0	NoEnrichment	NA
2710	g6729	0.63823	-0.0389675	NoEnrichment	sp|A4K2W1|SYS1_PONAB
27112	g9423	-0.454034	0.00413386	NoEnrichment	sp|F5HSE3|NIPLA_DANRE
27122	g9425	-0.511467	0.0370119	NoEnrichment	sp|P48547|KCNC1_HUMAN
27128	g9430	0.415436	0	NoEnrichment	NA
2715	g6732	0.713428	0.0409907	NoEnrichment	sp|Q54KA7|SECG_DICDI
27156	g14252	0.0294768	0.0529935	NoEnrichment	sp|P42003|MAD_DROME
27168	g14255	-0.228664	0.0458753	NoEnrichment	sp|P83686|NB5R3_PIG
2717	g6732	0.418544	0.0409907	NoEnrichment	sp|Q54KA7|SECG_DICDI
27197	g15955	-0.250763	0	NoEnrichment	NA
27215	g9244	0.453172	0	NoEnrichment	NA
27236	g9247	1.17398	0.105263	NoEnrichment	sp|Q16982|NECX_APLCA
27288	g2880	0.320769	0	NoEnrichment	NA
27289	g2880	-0.0266747	0	NoEnrichment	NA
2729	g6738	-0.029565	-0.0411871	NoEnrichment	sp|Q8R2N2|UTP4_MOUSE
27294	g2882	-0.0313757	0	NoEnrichment	NA
2730	g6739	-0.392323	0.0202044	NoEnrichment	sp|Q925G0|RBM3_RAT
27302	g29501	-0.427487	0	NoEnrichment	NA
2732	g6739	-0.118943	0.0202044	NoEnrichment	sp|Q925G0|RBM3_RAT
27331	g18860	0.00857981	0	NoEnrichment	NA
27338	g21336	-0.112099	0	NoEnrichment	NA
27343	g21337	-0.447817	0	NoEnrichment	NA
27361	g1957	0.440131	0	NoEnrichment	sp|Q8C1R0|TSSK5_MOUSE
27392	g1967	-0.197301	0.0102273	NoEnrichment	sp|Q2TA16|CCD65_BOVIN
27417	g1972	0.0544925	0	NoEnrichment	NA
2744	g6747	-0.255996	0	NoEnrichment	NA
2747	g6750	-0.312998	-0.25348	NoEnrichment	sp|P11833|TBB_PARLI
2748	g6750	-0.228127	-0.25348	NoEnrichment	sp|P11833|TBB_PARLI
2750	g6750	-0.447513	-0.25348	NoEnrichment	sp|P11833|TBB_PARLI
27511	g25842	0.578942	0	NoEnrichment	NA
27518	g2058	-0.243132	0	NoEnrichment	NA
27525	g2061	0.114587	0.000814308	NoEnrichment	sp|Q8VHN7|GPR98_MOUSE
27529	g2062	0.825956	0	NoEnrichment	NA
27547	g2068	0.111615	0	NoEnrichment	NA
27550	g2069	1.06565	0	NoEnrichment	NA
27551	g2069	0.883463	0	NoEnrichment	NA
27552	g2069	1.13286	0	NoEnrichment	NA
27569	g2083	0.147872	0.00597704	NoEnrichment	sp|A9JR78|TONSL_DANRE
27588	g28775	0.103842	0	NoEnrichment	sp|P34457|YMD3_CAEEL
27598	g28776	-0.243167	0.0049443	NoEnrichment	sp|Q7TN88|PK1L2_MOUSE
2761	g6753	-0.413479	1.13803	NoEnrichment	sp|P68372|TBB4B_MOUSE
2764	g6753	-0.20295	1.13803	NoEnrichment	sp|P68372|TBB4B_MOUSE
27657	g28474	0.688578	-0.0401358	NoEnrichment	sp|Q8VZH2|APM1_ARATH
27672	g28482	0.512863	0.00847661	NoEnrichment	sp|Q8BW72|KDM4A_MOUSE
2768	g6754	-0.232511	0	NoEnrichment	NA
27688	g28490	0.399786	-0.0309201	NoEnrichment	sp|B5DG67|WDR12_SALSA
27698	g28492	0.642488	0.00979169	NoEnrichment	sp|D3Z8N4|KLH20_RAT
27714	g28500	0.17309	0.0246787	NoEnrichment	sp|A7SJ66|U587_NEMVE
27729	g28505	1.30531	0	NoEnrichment	sp|O60290|ZN862_HUMAN
27778	g7935	0.640772	0.015094	NoEnrichment	sp|Q93127|GPR18_AMPAM
27783	g7936	0.288493	-0.00709122	NoEnrichment	sp|Q91175|ADA1A_ORYLA
27792	g7938	-0.183792	0.433117	NoEnrichment	sp|Q7RTX9|MOT14_HUMAN
27793	g7938	-0.262003	0.433117	NoEnrichment	sp|Q7RTX9|MOT14_HUMAN
27853	g23129	-0.152765	0	NoEnrichment	NA
27862	g23133	0.268632	0	NoEnrichment	NA
27863	g23133	0.750111	0	NoEnrichment	NA
27873	g23134	-0.226996	0.0302988	NoEnrichment	sp|Q52KK3|S2551_RAT
27896	g23140	0.439591	0.0893464	NoEnrichment	sp|Q02218|ODO1_HUMAN
27901	g23142	-0.118344	0	NoEnrichment	NA
27920	g23153	-0.155461	0.0684619	NoEnrichment	sp|P92208|JNK_DROME
27932	NA	0.133122	0	NoEnrichment	NA
27956	g11467	0.101664	0	NoEnrichment	NA
27966	g11470	1.50526	0.10354	NoEnrichment	sp|Q96LW9|ZSC31_HUMAN
27967	g11470	1.22355	0.10354	NoEnrichment	sp|Q96LW9|ZSC31_HUMAN
27969	g11470	1.10719	0.10354	NoEnrichment	sp|Q96LW9|ZSC31_HUMAN
27970	g11470	0.677737	0.10354	NoEnrichment	sp|Q96LW9|ZSC31_HUMAN
27971	g11470	1.27205	0.10354	NoEnrichment	sp|Q96LW9|ZSC31_HUMAN
27972	g11470	1.06466	0.10354	NoEnrichment	sp|Q96LW9|ZSC31_HUMAN
27975	g11470	0.00929553	0.10354	NoEnrichment	sp|Q96LW9|ZSC31_HUMAN
27981	g11471	1.03428	0.37037	NoEnrichment	sp|P24044|CALM_PLAFA
27994	g11473	-0.28225	-0.0699711	NoEnrichment	sp|Q9DBR7|MYPT1_MOUSE
280	g18938	0.506437	-0.0831299	NoEnrichment	sp|E1BMP7|DNA2_BOVIN
2800	g6758	0.0912935	0	NoEnrichment	sp|Q91EK3|REP_GOCV
28008	g12122	-1.38113	-0.287733	NoEnrichment	sp|Q9GLE4|MMP14_BOVIN
28010	g12122	-0.726613	-0.287733	NoEnrichment	sp|Q9GLE4|MMP14_BOVIN
2803	g6758	0.365256	0	NoEnrichment	sp|Q91EK3|REP_GOCV
28066	g30630	-0.40387	-0.000398043	NoEnrichment	sp|P42674|BP10_PARLI
28079	g30639	-0.0994697	0.0202348	NoEnrichment	sp|Q20191|NAS13_CAEEL
28092	g30641	-0.0642901	0	NoEnrichment	NA
28111	g29824	-0.267384	0	NoEnrichment	NA
28147	g24556	0.246897	0.0388869	NoEnrichment	sp|P54644|KRAC_DICDI
28154	g24559	-0.075741	0	NoEnrichment	NA
28221	g32429	0.248229	-0.0145501	NoEnrichment	sp|Q07139|ECT2_MOUSE
28246	g32440	-0.00534713	-0.00645911	NoEnrichment	sp|Q4R7L3|PRS6B_MACFA
28255	g32443	-0.0825077	0	NoEnrichment	NA
28257	g32443	0.211878	0	NoEnrichment	NA
2826	g6813	-0.64322	0.192687	NoEnrichment	sp|P05107|ITB2_HUMAN
28260	g32443	0.449552	0	NoEnrichment	NA
28278	g32449	-0.0078408	0.0543117	NoEnrichment	sp|A1L252|RANB9_DANRE
28296	g32456	-0.329718	0.0173439	NoEnrichment	sp|Q6GM82|ALAT2_XENLA
28314	g10850	-0.0368762	0	NoEnrichment	NA
28330	g10853	0.0311625	0.0243161	NoEnrichment	sp|Q5HZJ0|RNC_MOUSE
28333	g10854	0.186761	-0.00730084	NoEnrichment	sp|Q4QQY7|TGT_XENLA
28344	g21617	-0.292513	0	NoEnrichment	NA
28348	g21617	0.983393	0	NoEnrichment	NA
2835	g6813	-0.132356	0.192687	NoEnrichment	sp|P05107|ITB2_HUMAN
28366	g21617	0.422903	0	NoEnrichment	NA
28406	g21622	0.557201	0	NoEnrichment	NA
28409	g21622	0.131124	0	NoEnrichment	NA
28412	g21622	0.194006	0	NoEnrichment	NA
28426	g4694	-0.584072	0	NoEnrichment	NA
2849	g6824	-0.0750745	-0.147064	NoEnrichment	sp|P30151|EF1B_XENLA
28493	g29665	-0.0848384	0	NoEnrichment	NA
28494	g29665	-0.0808168	0	NoEnrichment	NA
28505	g29668	-0.250346	0	NoEnrichment	NA
28519	g29670	0.0601364	-0.177007	NoEnrichment	sp|Q95M18|ENPL_BOVIN
2852	g6825	0.294296	0.00299544	NoEnrichment	sp|Q9H0J4|QRIC2_HUMAN
28532	g22086	-0.487203	0.00332419	NoEnrichment	sp|Q5XGS8|GTPB1_XENLA
28558	g26003	0.675285	0	NoEnrichment	sp|G3V9H8|RET_RAT
28568	g28100	0.230799	0	NoEnrichment	sp|Q95SX7|RTBS_DROME
28574	g28101	0.211093	-0.159365	NoEnrichment	sp|Q5FVY2|RSLBB_XENTR
28604	g28112	-0.206562	0	NoEnrichment	NA
28617	g28117	0.175459	0.651277	NoEnrichment	sp|A6NMZ7|CO6A6_HUMAN
28623	g28118	0.014184	0	NoEnrichment	NA
28624	g28118	1.17738	0	NoEnrichment	NA
2867	g6835	-0.165601	0.101216	NoEnrichment	sp|A0JMP0|ATHL1_DANRE
28670	g11022	0.502388	0.00421876	NoEnrichment	sp|Q9H6U8|ALG9_HUMAN
28671	g11022	0.487582	0.00421876	NoEnrichment	sp|Q9H6U8|ALG9_HUMAN
28674	g11023	-0.080357	0.026592	NoEnrichment	sp|B2GUZ1|UBP4_RAT
28699	g11029	-0.2371	0	NoEnrichment	NA
28701	g11030	-0.400491	0	NoEnrichment	NA
28708	g11032	0.0838664	0	NoEnrichment	NA
28715	g11035	0.53858	0	NoEnrichment	NA
28734	g11037	0.119002	0.00310423	NoEnrichment	sp|Q9I8X3|FGFR3_DANRE
28735	g11037	-0.426917	0.00310423	NoEnrichment	sp|Q9I8X3|FGFR3_DANRE
28750	g11041	-0.110807	-0.0406321	NoEnrichment	sp|Q6PBU5|GRT1A_DANRE
28752	g11042	0.167129	0.0244968	NoEnrichment	sp|P50591|TNF10_HUMAN
28765	g11044	0.421393	-0.124685	NoEnrichment	sp|P98073|ENTK_HUMAN
28778	NA	0.264213	0	NoEnrichment	NA
28790	g29167	-0.0377675	0.0338683	NoEnrichment	sp|A0JMY5|NFXL1_XENLA
2880	g6839	-0.801344	0.00976328	NoEnrichment	sp|Q05944|HSP70_HYDVU
28827	g29176	0.333025	0.0226206	NoEnrichment	sp|Q9VZS6|NSMA_DROME
28876	g29199	0.581925	0	NoEnrichment	NA
28893	g23245	0.276034	0	NoEnrichment	NA
28903	g23249	0.577485	0	NoEnrichment	NA
28904	g23249	0.548331	0	NoEnrichment	NA
28905	g23249	1.32415	0	NoEnrichment	NA
28911	g23252	1.49744	0.0527263	NoEnrichment	sp|P23508|CRCM_HUMAN
28920	g23255	-0.44073	0.00195917	NoEnrichment	sp|Q14457|BECN1_HUMAN
28925	g23256	0.614643	0.00666928	NoEnrichment	sp|Q8BH31|MFSD8_MOUSE
28926	g23256	0.943018	0.00666928	NoEnrichment	sp|Q8BH31|MFSD8_MOUSE
28929	g23256	-0.428523	0.00666928	NoEnrichment	sp|Q8BH31|MFSD8_MOUSE
28954	g23268	0.0268086	0.171198	NoEnrichment	sp|O94827|PKHG5_HUMAN
28956	g23268	0.730041	0.171198	NoEnrichment	sp|O94827|PKHG5_HUMAN
28957	g23268	0.236785	0.171198	NoEnrichment	sp|O94827|PKHG5_HUMAN
28980	g23271	0.0416802	-0.0232078	NoEnrichment	sp|Q28EW0|TM87A_XENTR
29011	g23284	-0.501101	0.191316	NoEnrichment	sp|P54288|CACB2_RABIT
29018	g23284	-0.811562	0.191316	NoEnrichment	sp|P54288|CACB2_RABIT
29019	g23285	-1.00899	0	NoEnrichment	NA
29023	g23286	-0.556815	0	NoEnrichment	NA
29025	g23288	0.13781	0	NoEnrichment	NA
29027	g23288	-0.277265	0	NoEnrichment	NA
29032	g23289	0.413292	0	NoEnrichment	NA
29046	g23289	0.143559	0	NoEnrichment	NA
29048	g23289	-0.532331	0	NoEnrichment	NA
29055	g23291	-0.0230148	0	NoEnrichment	NA
2908	g6847	-0.552787	0.0766194	NoEnrichment	sp|P20673|ARLY_RAT
29087	NA	0.34657	0	NoEnrichment	NA
29088	NA	0.145962	0	NoEnrichment	NA
29106	g9033	-0.310567	0	NoEnrichment	NA
29110	g9034	-0.567295	0	NoEnrichment	NA
29124	g28537	-0.062938	0	NoEnrichment	NA
29125	g28537	0.714016	0	NoEnrichment	NA
29126	g28537	0.419157	0	NoEnrichment	NA
29138	g28550	-0.460872	0	NoEnrichment	NA
2918	g32626	-0.38547	0	NoEnrichment	NA
29192	g28594	-0.642821	0.190272	NoEnrichment	sp|Q9Z2I4|ROBO3_MOUSE
29193	g28594	0.150945	0.190272	NoEnrichment	sp|Q9Z2I4|ROBO3_MOUSE
29205	g28597	-0.180505	-0.00691755	NoEnrichment	sp|Q54LN4|GGHA_DICDI
29221	g28606	-0.404648	0.288871	NoEnrichment	sp|Q06507|ATF4_MOUSE
29223	g28606	-0.200867	0.288871	NoEnrichment	sp|Q06507|ATF4_MOUSE
29235	g28608	0.0562971	0.012075	NoEnrichment	sp|Q7Z2H8|S36A1_HUMAN
29248	g28610	-0.049633	-0.000454612	NoEnrichment	sp|Q9H1Y3|OPN3_HUMAN
[truncated: 5,966 more rows]
