# Supplementary material for: Generic injuries are sufficient to induce ectopic Wnt organizers in Hydra
Source: eLife. 2021 Mar 29;10:e60562. doi: 10.7554/eLife.60562 (PMC8049744; doi:10.7554/eLife.60562)
Supplement: Figure 3—figure supplement 2—source data 1. — The first sheet in the workbook (‘Descriptions’) contains individual descriptions for the tables included in the workbook. [file elife-60562-fig3-figsupp2-data1.xlsx]

## Sheet: Descriptions
Fig-Sup2E	Comparison of the injury-induced change in transcript abundance during head and foot regeneration at 12 hpa in iCRT14-treated animals. Combines results from Hi12vHi0 and Fi12vFi0 and uses peaks that passed significance thresholds in Hi12vHi0, Fi12vFi0, or Hi12vFi12c0 (corresponding formulate for comparison names and full results tables provided in Sup. File 2).
Fig-Sup2F	Comparison of the injury-induced change in chromatin accessibility during head and foot regeneration at 12 hpa in iCRT14-treated animals. Combines results from Hi12Hi0 and Fi12Fi0 and uses peaks that passed significance thresholds in Hi12Hi0, Fi12Fi0, or inhib12c0 (corresponding formulate for comparison names and full results tables provided in Sup. File 1).

## Sheet: Fig3-Sup2E
Gene ID	Swissprot Annotation	Foot Reg logFC	Head Reg logFC	Structural Enrichment
g1000	sp|P21329|RTJK_DROFU	1.05159	0.214673	Not Interesting
g10002	sp|Q9H611|PIF1_HUMAN	-0.193709	1.14111	Not Interesting
g10003	sp|A5WFR0|PIF1_PSYWF	0.147878	1.62408	Not Interesting
g10004	NA	0.978264	1.68388	Not Interesting
g10005	NA	0.371645	0.772765	Not Interesting
g10006	NA	2.14246	0.614866	Not Interesting
g10008	sp|A6QPH9|ZMYM5_BOVIN	0.930739	0.0672907	Not Interesting
g10014	sp|P55199|ELL_HUMAN	-0.245279	0.0800742	Not Interesting
g10016	NA	0.253343	0.200242	Not Interesting
g10017	sp|Q2KIA2|TR112_BOVIN	0.651015	0.733163	Not Interesting
g10018	sp|Q4I963|COFI_GIBZE	-0.814522	0.741323	Head
g1002	sp|Q9D3W5|LRC71_MOUSE	0.521794	-0.246379	Not Interesting
g10020	sp|P70057|KCNQ1_XENLA	-1.06735	-1.80155	Not Interesting
g10022	sp|Q91W67|UBL7_MOUSE	0.887957	0.505356	Not Interesting
g10027	sp|P0C6Y7|PRDM9_RAT	-0.893193	-0.667851	Not Interesting
g10028	NA	-1.55707	1.74269	Not Interesting
g10029	sp|Q6ZMW2|ZN782_HUMAN	-0.727742	-1.00345	Not Interesting
g1003	NA	0.800494	0.145681	Not Interesting
g10030	sp|Q8JI28|TLL1_XENLA	-0.149075	0.328169	Not Interesting
g10031	NA	-0.555891	1.11853	Not Interesting
g10032	sp|Q05B58|CCD53_BOVIN	-0.845329	0.195187	Head
g10033	NA	0.415952	0.0138439	Not Interesting
g10034	sp|P08419|CEL2A_PIG	0.730844	0.544051	Not Interesting
g10035	sp|Q7M3E1|CTRC_BOVIN	0.164124	-0.211066	Not Interesting
g10037	sp|Q90YM8|CYFP1_DANRE	-0.205188	-0.114221	Not Interesting
g10038	sp|Q299G2|CYFIP_DROPS	-0.669007	0.0457356	Not Interesting
g10039	sp|Q5SQX6|CYFP2_MOUSE	0.0390436	-0.0550581	Not Interesting
g1004	sp|Q0II91|DJC21_BOVIN	-0.0430837	-0.599864	Not Interesting
g10040	sp|Q9NYQ6|CELR1_HUMAN	-0.464758	-1.05676	Not Interesting
g10041	sp|Q90YM8|CYFP1_DANRE	-0.177846	-0.0211486	Not Interesting
g10042	sp|Q8K2L8|TPC12_MOUSE	-0.0698082	-0.192061	Not Interesting
g10044	NA	0.708273	-0.256633	Foot
g10045	sp|P61765|STXB1_RAT	1.41563	1.81477	Not Interesting
g10047	sp|Q9UUC1|RL21A_SCHPO	0.4437	0.229204	Not Interesting
g10048	sp|Q4R5Z4|INT9_MACFA	0.0562222	0.2789	Not Interesting
g10049	NA	-0.0702838	-0.656377	Not Interesting
g10050	sp|A7SBF0|INT9_NEMVE	-0.171755	0.229486	Not Interesting
g10051	sp|A1L2P5|HXD3_XENLA	0.371254	0.780589	Not Interesting
g10056	sp|P0CJ14|VP302_LYCMC	9.41953	10.8483	Not Interesting
g10057	sp|P31596|EAA2_RAT	-0.00868541	0.00352413	Not Interesting
g1006	NA	-2.48859	-1.21935	Not Interesting
g10061	sp|P21328|RTJK_DROME	1.28389	0.215726	Not Interesting
g10065	sp|O57321|EAA1_AMBTI	-0.598501	0.276589	Not Interesting
g10066	sp|Q95135|EAA3_BOVIN	0.344953	0.0888613	Not Interesting
g10068	sp|Q8LGG8|USPAL_ARATH	0.423145	-0.243992	Not Interesting
g10069	NA	0.206336	0.596095	Not Interesting
g1007	sp|Q09328|MGT5A_HUMAN	0.522151	0.378974	Not Interesting
g10070	sp|Q6XUX0|DUSTY_CHICK	-0.133879	-0.491835	Not Interesting
g10071	NA	1.1689	0.431918	Not Interesting
g10074	NA	0.741192	-0.111347	Not Interesting
g10076	sp|Q6XUX2|DUSTY_RAT	-0.912316	-0.0337964	Not Interesting
g10077	sp|Q96MF2|STAC3_HUMAN	0.216644	-0.0987531	Not Interesting
g10078	sp|Q9H1Y0|ATG5_HUMAN	-0.242743	-0.521588	Not Interesting
g10081	sp|Q4R6U7|RM30_MACFA	0.0273762	-0.087229	Not Interesting
g10082	sp|Q9GZQ3|COMD5_HUMAN	0.125942	0.686812	Not Interesting
g10083	sp|Q9BSV6|SEN34_HUMAN	-0.0930173	-0.569307	Not Interesting
g10084	sp|P27448|MARK3_HUMAN	-0.179628	-0.326996	Not Interesting
g10085	sp|O96006|ZBED1_HUMAN	1.03479	0.512596	Not Interesting
g10086	NA	0.757767	0.594324	Not Interesting
g10088	sp|Q9HAV4|XPO5_HUMAN	0.336538	-0.774742	Foot
g10089	sp|Q924C1|XPO5_MOUSE	0.511726	-0.574728	Not Interesting
g10091	sp|Q8VIB2|DAXX_RAT	-0.125721	-0.378391	Not Interesting
g10093	sp|Q8WZA0|LZIC_HUMAN	0.619253	0.132617	Not Interesting
g10095	sp|Q8BGQ1|SPE39_MOUSE	-0.0285929	-0.421114	Not Interesting
g10096	sp|F6RIX4|MCM9_XENTR	-0.187625	-0.192394	Not Interesting
g10100	sp|Q6DJF8|MET23_XENLA	0.865713	0.0387051	Not Interesting
g10102	sp|Q6P7K5|EMC10_XENTR	0.601705	0.317817	Not Interesting
g10106	sp|Q96PZ7|CSMD1_HUMAN	0.0525095	0.108589	Not Interesting
g10107	sp|O60232|SSA27_HUMAN	-0.130586	0.471713	Not Interesting
g1011	sp|Q8IYS1|P20D2_HUMAN	0.102867	0.302549	Not Interesting
g10114	NA	-0.570979	-0.108868	Not Interesting
g10117	NA	0.379933	0.535056	Not Interesting
g10118	sp|Q9NW15|ANO10_HUMAN	-0.00917913	-0.142144	Not Interesting
g10119	sp|Q6AZT2|SPAST_XENLA	0.0679282	0.189998	Not Interesting
g1012	sp|A3KG59|P20D2_MOUSE	0.172348	0.365183	Not Interesting
g10121	sp|Q8IS44|DRD2L_DROME	-2.09966	-2.04865	Not Interesting
g10122	NA	0.372561	-0.328821	Not Interesting
g10123	sp|Q5BLE8|RETST_DANRE	-0.0494197	0.438149	Not Interesting
g10124	sp|P29540|T2EB_XENLA	0.660422	-0.0834077	Not Interesting
g10126	NA	-0.12789	-1.65442	Foot
g10127	sp|Q91287|FGFR3_PLEWA	-0.0495648	0.247362	Not Interesting
g1013	sp|Q501L1|P20D2_XENTR	0.232541	0.163321	Not Interesting
g10131	sp|Q9CY57|CHTOP_MOUSE	1.05947	0.00753638	Foot
g10133	sp|Q9VB25|KL98A_DROME	0.074106	0.459515	Not Interesting
g10134	NA	0.389726	0.0220999	Not Interesting
g10136	sp|Q91287|FGFR3_PLEWA	0.362413	0.179035	Not Interesting
g10139	NA	0.165513	-0.692525	Not Interesting
g1014	sp|P85107|TGS1_RAT	0.350055	-1.38686	Foot
g10140	sp|Q6TCH4|PAQR6_HUMAN	-0.727489	0.07778	Not Interesting
g10141	sp|Q9BXW6|OSBL1_HUMAN	-0.589445	0.666728	Head
g10142	sp|Q9H0R3|TM222_HUMAN	-0.0975677	0.0377689	Not Interesting
g10144	sp|Q9H0R3|TM222_HUMAN	-0.267472	-0.592617	Not Interesting
g10145	sp|Q96CM3|RUSD4_HUMAN	-0.10468	0.496698	Not Interesting
g10146	sp|Q3U0J8|TBD2B_MOUSE	-1.26201	-0.665815	Not Interesting
g10147	NA	-1.73799	-0.0417111	Not Interesting
g10148	sp|Q9BYX2|TBD2A_HUMAN	-1.11156	-0.509042	Not Interesting
g1015	sp|A3KG59|P20D2_MOUSE	0.148872	0.334278	Not Interesting
g10150	sp|Q9R0M5|TPK1_MOUSE	1.06099	-0.505264	Foot
g10157	sp|Q9JLI7|SPAG6_MOUSE	-3.47347	1.64234	Head
g10161	NA	0.58751	0.442378	Not Interesting
g10162	sp|Q9JLI7|SPAG6_MOUSE	-0.542566	0.138601	Not Interesting
g10164	NA	0.529664	0.84684	Not Interesting
g10165	sp|P30754|CAFF_RIFPA	0.723032	-0.517188	Foot
g10166	sp|B8V7R6|COA_ACRMI	0.477645	-0.309511	Not Interesting
g10167	NA	-0.153725	0.936439	Not Interesting
g10168	sp|Q66GT5|PTPM1_MOUSE	0.723587	0.140664	Not Interesting
g1017	sp|B8VIW9|FP_ACRMI	-0.695005	0.275186	Not Interesting
g10170	sp|Q4V7W3|HEXIM_XENLA	0.14883	-0.167553	Not Interesting
g10171	sp|Q6IQX7|CHSS2_MOUSE	0.698889	0.0521295	Not Interesting
g10174	sp|Q8IZ52|CHSS2_HUMAN	0.135652	0.599911	Not Interesting
g10175	sp|Q5RDU7|YPEL5_PONAB	0.0699516	0.748468	Not Interesting
g10176	sp|Q9Y6W3|CAN7_HUMAN	1.19657	-0.728239	Not Interesting
g10179	sp|Q9R1S8|CAN7_MOUSE	0.100688	0.0614334	Not Interesting
g1018	sp|Q9X5V3|ATCU_RHILV	-1.6145	-0.177995	Not Interesting
g10182	sp|Q9R1S8|CAN7_MOUSE	-0.024323	-0.218431	Not Interesting
g10184	NA	-0.462797	1.08538	Not Interesting
g10186	sp|O14718|OPSX_HUMAN	0.316875	-0.459632	Not Interesting
g10198	NA	-0.299032	-0.446319	Not Interesting
g102	sp|P97765|WBP2_MOUSE	-0.227284	1.204	Head
g10205	sp|Q9UBN7|HDAC6_HUMAN	-0.504798	-0.941412	Not Interesting
g10206	sp|Q00808|HETE1_PODAS	-0.311571	0.00463054	Not Interesting
g10207	NA	1.89329	0.42678	Not Interesting
g10208	NA	0.871827	-0.550284	Not Interesting
g10209	sp|Q804X9|OPN4A_GADMO	1.03894	0.0827505	Not Interesting
g1021	sp|Q9JJI8|RL38_MOUSE	-2.8933	2.80013	Head
g10210	sp|Q2KJ97|NCDN_BOVIN	-0.043362	-0.79875	Not Interesting
g10211	NA	0.0332699	-0.366568	Not Interesting
g10212	sp|Q32NR9|FRITZ_XENLA	0.095953	-0.156176	Not Interesting
g10216	NA	0.774357	-0.141321	Not Interesting
g10217	sp|Q9NBX4|RTXE_DROME	0.247047	-0.0897043	Not Interesting
g10221	sp|Q9H270|VPS11_HUMAN	0.00371726	-0.515939	Not Interesting
g10222	sp|Q91W86|VPS11_MOUSE	-0.0806533	-0.19903	Not Interesting
g10223	NA	0.415357	0.206022	Not Interesting
g10224	sp|Q91W86|VPS11_MOUSE	-0.794144	0.790079	Not Interesting
g10225	sp|Q91W86|VPS11_MOUSE	-0.0829168	-0.229161	Not Interesting
g10230	sp|Q9Y493|ZAN_HUMAN	-2.39178	-1.11168	Not Interesting
g10231	NA	-1.89094	-2.12432	Not Interesting
g10232	NA	-2.49127	-0.614503	Not Interesting
g10234	NA	0.437074	-0.19687	Not Interesting
g10235	sp|P23253|TCNA_TRYCR	0.0714782	-0.420738	Not Interesting
g10236	sp|Q14246|AGRE1_HUMAN	-0.355397	1.82268	Head
g10239	sp|Q8CG19|LTBP1_MOUSE	-0.743109	-0.529327	Not Interesting
g10240	sp|Q96WV6|YHU2_SCHPO	-0.811497	-0.387188	Not Interesting
g10244	sp|Q14766|LTBP1_HUMAN	-1.39707	1.21717	Head
g10245	sp|P0CT40|TF29_SCHPO	0.644529	0.867124	Not Interesting
g10249	sp|Q96WV6|YHU2_SCHPO	-0.249176	-0.473368	Not Interesting
g1025	NA	-1.11482	-1.49201	Not Interesting
g10253	sp|Q99MW1|STK31_MOUSE	-0.563653	-0.1386	Not Interesting
g10255	sp|Q80T41|GABR2_MOUSE	0.171044	-0.175295	Not Interesting
g10256	sp|Q9HCU4|CELR2_HUMAN	-0.749968	-0.520352	Not Interesting
g1026	sp|Q9UHW5|GPN3_HUMAN	-0.167762	-0.52503	Not Interesting
g10262	sp|P56101|DNJC5_TETCF	0.333805	0.134585	Not Interesting
g1027	sp|Q9Y3C4|TPRKB_HUMAN	1.35002	-0.793616	Not Interesting
g10270	NA	-0.256659	0.578126	Not Interesting
g10271	sp|Q9S7T7|SCC11_ARATH	0.119166	0.0403677	Not Interesting
g10273	sp|Q6AXJ7|F199X_DANRE	0.699615	-0.272038	Foot
g10276	sp|Q8BJL1|FBX30_MOUSE	0.0428707	-0.384338	Not Interesting
g1028	sp|Q28CA0|PITC1_XENTR	0.575615	-0.247366	Not Interesting
g10288	sp|Q5SVZ6|ZMYM1_HUMAN	0.574655	0.833374	Not Interesting
g10289	sp|P42669|PURA_MOUSE	0.542239	0.144117	Not Interesting
g1029	sp|Q8BHA3|DTD2_MOUSE	0.138201	-0.42878	Not Interesting
g10292	sp|Q64487|PTPRD_MOUSE	0.791268	-0.599307	Foot
g10293	NA	-0.157725	0.623459	Not Interesting
g10295	sp|Q96HJ3|CCD34_HUMAN	0.133233	-0.0715603	Not Interesting
g10296	sp|Q9W6B4|TIMP3_SCYTO	0.119096	-0.462314	Not Interesting
g10298	sp|Q76KP1|B4GN4_HUMAN	-3.04377	-2.49808	Not Interesting
g103	sp|P29322|EPHA8_HUMAN	0.334013	-1.45834	Not Interesting
g10300	sp|Q76KP1|B4GN4_HUMAN	4.47108	3.41728	Not Interesting
g10301	sp|Q8VHC8|MA2B1_CAVPO	0.229646	-0.142169	Not Interesting
g10303	sp|P0C026|NUD24_ARATH	0.336222	0.738898	Not Interesting
g10304	NA	-0.423242	-0.493964	Not Interesting
g10305	sp|Q9D7A8|ARMC1_MOUSE	-0.0135302	0.360395	Not Interesting
g10306	NA	0.440964	0.551316	Not Interesting
g10308	NA	-0.0310397	0.00945364	Not Interesting
g10309	sp|Q92968|PEX13_HUMAN	-0.502256	0.565741	Head
g1031	sp|Q9D1C9|RRP7A_MOUSE	0.87269	-0.540795	Foot
g10310	sp|Q95SX7|RTBS_DROME	-0.730005	-0.247969	Not Interesting
g10312	NA	0.00899382	-0.512208	Not Interesting
g10313	NA	0.362899	-0.232114	Not Interesting
g10316	sp|P61222|ABCE1_MOUSE	-0.336466	0.350884	Head
g10317	sp|Q8NI36|WDR36_HUMAN	-0.319853	0.199279	Not Interesting
g1032	NA	2.05708	-0.0182426	Foot
g10320	sp|Q8NI36|WDR36_HUMAN	-0.420898	0.0250295	Not Interesting
g10321	sp|Q8NA54|IQUB_HUMAN	-0.310382	-0.219919	Not Interesting
g10322	sp|Q9NBX4|RTXE_DROME	-0.143098	1.25237	Not Interesting
g10323	NA	0.447793	-0.03429	Not Interesting
g10324	sp|Q8BG95|MYPT2_MOUSE	-0.155036	-0.313697	Not Interesting
g10325	NA	0.250206	-0.334975	Not Interesting
g10327	sp|P21675|TAF1_HUMAN	-0.570457	0.246878	Not Interesting
g10328	sp|Q60544|TAF1_MESAU	-0.04301	-0.250864	Not Interesting
g10329	sp|Q8IZX4|TAF1L_HUMAN	-0.381217	0.238905	Not Interesting
g1033	sp|Q9ULU4|PKCB1_HUMAN	-0.655506	1.26947	Not Interesting
g10330	sp|Q58DN4|PPME1_BOVIN	-0.436152	0.0668586	Not Interesting
g10331	sp|Q6AYU1|MO4L1_RAT	0.245452	-0.743763	Foot
g10332	sp|J9VXM5|CHS3_CRYNH	-0.378507	-0.26792	Not Interesting
g10336	sp|Q6DRF9|WDR55_DANRE	0.19911	0.551562	Not Interesting
g10337	sp|Q17QK8|SPRE_BOVIN	0.741234	-0.482025	Not Interesting
g10338	sp|A2AVA0|SVEP1_MOUSE	-0.958382	-0.980454	Not Interesting
g1034	sp|Q9ULU4|PKCB1_HUMAN	0.466919	0.592466	Not Interesting
g10340	NA	0.318351	0.668655	Not Interesting
g10344	sp|Q4LDE5|SVEP1_HUMAN	-0.893169	-0.165196	Not Interesting
g10345	sp|Q6MG82|PRRT1_RAT	-0.56672	-0.015666	Not Interesting
g10348	NA	-4.59508	0.835504	Not Interesting
g10349	NA	-4.10413	-2.20222	Not Interesting
g10351	sp|Q9QUN9|DKK3_MOUSE	-0.27663	0.323487	Not Interesting
g10357	sp|Q9U3I4|EMRE_CAEEL	-0.268784	0.57577	Not Interesting
g10358	NA	0.914078	-0.0556471	Not Interesting
g10359	sp|Q38931|FKB62_ARATH	0.262694	0.409526	Not Interesting
g1036	NA	-0.246825	-0.695028	Not Interesting
g10360	NA	-0.00443993	-0.180757	Not Interesting
g10361	NA	0.284355	0.234386	Not Interesting
g10362	NA	-1.72692	-1.91936	Not Interesting
g10363	sp|Q1D823|AGLZ_MYXXD	-2.20955	-0.984217	Not Interesting
g10364	NA	-1.29705	-0.911283	Not Interesting
g10365	sp|Q5R573|RBL2A_PONAB	0.106199	0.477744	Not Interesting
g10366	sp|Q2T9N1|F1142_BOVIN	0.792076	0.0999656	Not Interesting
g10367	sp|Q8CH40|NUDT6_MOUSE	0.268436	1.04462	Not Interesting
g10368	NA	-0.0904961	-0.130175	Not Interesting
g10369	sp|Q24799|MYPH_ECHGR	0.447948	0.635405	Not Interesting
g1037	NA	-1.20617	-0.906606	Not Interesting
g10370	sp|Q96Q05|TPPC9_HUMAN	-0.346752	-1.11707	Not Interesting
g10377	sp|Q32PH0|TPPC9_BOVIN	-0.247348	-1.32491	Foot
g10378	sp|P79942|NOCT_XENLA	0.852346	-0.544371	Foot
g10379	sp|Q8IRC7|AWH_DROME	-0.0825484	0.321929	Not Interesting
g10380	sp|P49919|CDN1C_MOUSE	0.490954	1.52144	Head
g10382	NA	-1.69818	2.37334	Head
g10385	sp|Q80SU7|GVIN1_MOUSE	-1.35998	-1.99938	Not Interesting
g10387	sp|Q8CIF6|SIDT2_MOUSE	-0.0730324	-0.596362	Not Interesting
g10391	sp|P57716|NICA_MOUSE	-0.365189	-0.184898	Not Interesting
g10392	sp|O35264|PA1B2_RAT	-0.384634	0.196097	Not Interesting
g10394	NA	0.548755	-0.146831	Not Interesting
g10399	sp|O54698|S29A1_RAT	-0.520119	-1.3677	Not Interesting
g104	sp|Q91V09|WDR13_MOUSE	-1.24705	-0.0426429	Not Interesting
g1040	NA	-1.67421	-0.286573	Not Interesting
g10404	NA	2.39111	-0.296066	Not Interesting
g1041	NA	0.205444	-1.09142	Not Interesting
g10410	sp|Q4H4B6|SCRIB_DANRE	-0.681127	-0.0852831	Not Interesting
g10411	NA	2.35271	0.555788	Foot
g10412	sp|P56380|AP4A_MOUSE	0.943674	-0.0628061	Not Interesting
g10413	sp|Q1L8G7|GATD1_DANRE	0.692984	-0.911199	Not Interesting
g10418	sp|Q7ZXY4|GATD1_XENLA	0.333939	-1.34063	Not Interesting
g10419	NA	0.291915	-0.620113	Not Interesting
g1042	NA	-0.886367	-0.684228	Not Interesting
g10420	sp|Q14160|SCRIB_HUMAN	-0.376553	-0.089491	Not Interesting
g10424	sp|A6QM06|SCAP_BOVIN	-0.002234	0.348145	Not Interesting
g10427	NA	1.06737	0.304175	Not Interesting
g10428	NA	-0.35076	-0.0820822	Not Interesting
g10437	sp|G3V9H8|RET_RAT	-0.428313	-0.332858	Not Interesting
g10440	sp|G3V9H8|RET_RAT	0.201689	-0.190436	Not Interesting
g10458	sp|Q18775|DOPR4_CAEEL	3.8667	2.60142	Not Interesting
g10464	sp|Q3MV19|TRF6A_XENLA	-0.689461	0.43143	Not Interesting
g10475	NA	-0.768533	-1.04299	Not Interesting
g10482	sp|Q62829|PAK3_RAT	0.00382361	-0.155404	Not Interesting
g10483	sp|Q5XXP2|OPN4_PHOSU	0.95986	0.256001	Not Interesting
g10484	sp|Q6DF08|UXS1_XENTR	-0.115617	1.03179	Head
g10485	NA	0.431452	0.130682	Not Interesting
g10487	NA	0.663998	-0.164071	Not Interesting
g10491	NA	-0.404944	0.234123	Not Interesting
g10493	sp|Q6DGP4|NFI1L_DANRE	-0.43935	0.441481	Head
g10494	sp|A7RWC9|ITPA_NEMVE	0.123122	0.545702	Not Interesting
g10498	sp|O93603|TRFR_CHICK	0.119233	-1.7823	Foot
g10499	NA	0.109969	-0.211345	Not Interesting
g105	sp|Q6DKP5|WDR13_PANTR	-0.670886	-0.157117	Not Interesting
g1050	NA	0.00990035	-0.733517	Not Interesting
g10500	NA	0.201085	-0.467068	Not Interesting
g10501	sp|Q6DGL2|KBRS2_DANRE	-0.35291	0.486958	Not Interesting
g10502	NA	0.558622	-0.866339	Foot
g10506	NA	0.3632	-0.652523	Foot
g10509	sp|B0K020|CISD1_RAT	-0.0370672	0.662445	Not Interesting
g10511	sp|Q8CFV2|F149A_MOUSE	-1.15818	-0.444674	Not Interesting
g10512	sp|P54145|AMT1_CAEEL	1.03071	1.10238	Not Interesting
g10513	sp|Q9DB27|MCTS1_MOUSE	0.275055	0.314592	Not Interesting
g10514	sp|Q6PFL8|THYN1_DANRE	0.204742	0.369402	Not Interesting
g10515	sp|Q28DE6|RSBNL_XENTR	-0.23669	0.139289	Not Interesting
g10516	sp|Q4FZV0|MANBA_RAT	-0.25985	-0.264406	Not Interesting
g10517	sp|P55115|NAS15_CAEEL	0.621961	-0.361434	Foot
g10519	sp|Q7Z3G6|PRIC2_HUMAN	0.486245	0.727782	Not Interesting
g10520	sp|Q8CH62|ORAV1_MOUSE	-0.0341971	0.00513519	Not Interesting
g10525	sp|Q9Y2L1|RRP44_HUMAN	0.137797	-0.774274	Foot
g10527	sp|Q9CSH3|RRP44_MOUSE	-1.31781	0.0143892	Head
g10529	NA	-0.447682	-0.111956	Not Interesting
g1053	NA	1.08077	0.0309503	Not Interesting
g10530	sp|Q17RP2|TIGD6_HUMAN	1.38738	1.71614	Not Interesting
g10534	sp|O57478|HEMH_XENLA	-0.172669	0.280137	Not Interesting
g10535	sp|Q9WVG9|MS3L1_MOUSE	-0.668098	-0.281537	Not Interesting
g10536	sp|Q08874|MITF_MOUSE	-0.405087	-0.991933	Not Interesting
g10537	sp|Q8VC42|MIC1_MOUSE	0.573187	-0.262534	Not Interesting
g10540	sp|Q0Z8U2|RS3_PIG	0.199514	0.477283	Not Interesting
g10541	NA	0.89196	0.222746	Not Interesting
g10543	sp|P62907|RL10A_RAT	0.169053	0.166915	Not Interesting
g10545	NA	0.184851	0.93799	Not Interesting
g10546	sp|O18883|TXND9_BOVIN	0.455011	0.991755	Not Interesting
g10550	NA	-3.71879	1.71458	Not Interesting
g10556	sp|P49010|HEXC_BOMMO	-0.154591	-0.0629824	Not Interesting
g10560	sp|Q9D7M8|RPB4_MOUSE	-2.05218	1.98874	Head
g10565	sp|Q9WVM4|ICMT_RAT	0.474566	-0.0522038	Not Interesting
g10568	sp|Q9W590|LSG1_DROME	0.245578	-0.0440593	Not Interesting
g10569	NA	-0.415213	-1.1287	Not Interesting
g10572	NA	-1.62723	-0.382326	Not Interesting
g10574	sp|A7RR04|EFGM_NEMVE	-0.812964	0.262805	Not Interesting
g10575	sp|A7RR04|EFGM_NEMVE	-0.411925	0.0575761	Not Interesting
g10576	NA	0.288545	-1.47479	Not Interesting
g10578	sp|Q804T6|DIX1A_DANRE	-0.353483	-0.480723	Not Interesting
g10580	sp|H2LBU8|YAP1_ORYLA	-0.416764	-0.296609	Not Interesting
g10581	sp|P02264|H2A_ONCMY	-0.527453	-0.389521	Not Interesting
g10585	sp|Q8IZJ1|UNC5B_HUMAN	1.6421	0.9117	Not Interesting
g10588	sp|Q9V785|3BP5H_DROME	0.0465404	1.20204	Head
g1059	sp|P61214|ARL4A_RAT	0.767639	0.127466	Not Interesting
g10590	sp|P39447|ZO1_MOUSE	-0.125472	0.102699	Not Interesting
g10591	sp|Q499N2|AP5M1_RAT	0.169249	-0.409974	Not Interesting
g10592	sp|Q5ZI51|ARHL2_CHICK	0.414944	-0.176061	Not Interesting
g10594	sp|O35426|XBP1_MOUSE	0.312213	0.953662	Not Interesting
g10598	sp|P09760|FER_RAT	-0.602203	-0.424488	Not Interesting
g106	sp|Q9LS45|PCR5_ARATH	-0.427776	-0.428576	Not Interesting
g10604	sp|P49715|CEBPA_HUMAN	-0.640976	0.0651295	Head
g10605	sp|P35072|TCB1_CAEBR	-0.864983	0.421559	Not Interesting
g10606	sp|O15381|NVL_HUMAN	-0.52511	0.0326899	Not Interesting
g10609	NA	1.24534	-1.48547	Not Interesting
g10611	NA	0.666648	0.503032	Not Interesting
g10616	sp|Q80U35|ARHGH_MOUSE	-1.31263	-1.47671	Not Interesting
g1062	NA	0.179182	-1.2976	Not Interesting
g10620	NA	0.234362	-0.914579	Not Interesting
g10621	sp|A1L1R5|PTPC1_DANRE	-0.70623	-0.597926	Not Interesting
g10622	sp|Q766D5|B4GN4_MOUSE	0.833026	0.0626873	Not Interesting
g1063	sp|P0DN09|VKT5_ANEVI	2.10062	2.49431	Not Interesting
g10637	sp|Q766D5|B4GN4_MOUSE	0.00146775	-1.18387	Foot
g10638	NA	0.880778	-0.364734	Not Interesting
g1064	sp|Q28864|TFPI1_MACMU	2.92479	2.16254	Not Interesting
g10640	sp|Q7T0P7|ATP23_XENLA	-0.807656	0.89912	Head
g10641	sp|Q6DIN3|MBTD1_XENTR	-0.534836	-0.0617406	Not Interesting
g10645	sp|Q6DIN3|MBTD1_XENTR	-0.652131	-0.011434	Head
g10646	sp|A6QLT2|MTMR2_BOVIN	-0.0233053	0.268114	Not Interesting
g10648	sp|Q5R7P4|BGAL_PONAB	0.0181222	-0.815111	Not Interesting
g10649	sp|Q9VJ79|PDE11_DROME	-0.85148	-0.964322	Not Interesting
g10650	sp|Q7LL04|YQK1_SCHPO	2.07307	1.85061	Not Interesting
g10654	NA	-0.635158	-1.59032	Not Interesting
g1066	sp|Q9D0F6|RFC5_MOUSE	-0.675705	0.722007	Head
g10666	NA	-1.23526	-1.46695	Not Interesting
g1067	NA	-0.487669	-0.61781	Not Interesting
g10676	sp|A2AJ76|HMCN2_MOUSE	-0.190109	-1.07238	Not Interesting
g10677	sp|Q8VIG3|RSPH1_MOUSE	-0.321657	-0.645919	Not Interesting
g10678	sp|O35594|IFT81_MOUSE	-0.956516	-0.230428	Not Interesting
g10680	sp|H2A0N9|KCP4_PINMG	5.37733	5.74525	Not Interesting
g10681	sp|P0CJ14|VP302_LYCMC	0.731934	0.401818	Not Interesting
g10682	sp|P38977|ANTA_HYDVU	7.51162	7.9786	Not Interesting
g10687	sp|Q3SZB4|ACADM_BOVIN	0.288087	0.874748	Not Interesting
g10688	sp|Q5EBP3|ARMC5_MOUSE	0.327401	0.134617	Not Interesting
g10689	sp|Q94420|MEL26_CAEEL	0.911009	0.0940929	Not Interesting
g10690	sp|Q91ZQ0|VMP1_RAT	0.394475	0.0949024	Not Interesting
g10693	NA	0.332724	-0.245379	Not Interesting
g10694	sp|P79282|FUT8_PIG	-0.192444	-0.859222	Not Interesting
g10696	sp|Q5ZLD7|VPS53_CHICK	0.0767568	0.341996	Not Interesting
g10697	NA	-0.00503412	0.25597	Not Interesting
g10699	sp|Q9DBG3|AP2B1_MOUSE	-0.880741	1.12974	Head
g107	sp|P97765|WBP2_MOUSE	0.454596	0.6898	Not Interesting
g10700	sp|Q0VH32|MNT_XENLA	-1.06302	-1.64815	Not Interesting
g10703	sp|E9Q5R7|NAL12_MOUSE	-0.142375	-1.2451	Not Interesting
g10704	sp|Q9DBG3|AP2B1_MOUSE	-0.108811	0.524492	Not Interesting
g10705	sp|Q99PV0|PRP8_MOUSE	-0.455144	-0.0167622	Not Interesting
g10706	sp|P0CP96|FKBP2_CRYNJ	0.491631	0.510799	Not Interesting
g10708	sp|B9KL80|RL1_RHOSK	0.42395	0.197852	Not Interesting
g10709	NA	0.789311	0.483872	Not Interesting
g1071	sp|A7S4N4|SERIC_NEMVE	-0.217428	-0.231954	Not Interesting
g10710	sp|Q9TVC1|VATH_PIG	0.631375	0.340099	Not Interesting
g10711	NA	-0.0746753	0.219466	Not Interesting
g10713	sp|Q7T0Y4|DRC1_XENLA	0.18111	-0.704368	Not Interesting
g10718	NA	-0.0866556	-1.01263	Not Interesting
g1072	sp|Q8WW35|TC1D2_HUMAN	-0.0273079	-1.58057	Foot
g10720	sp|Q9Z1A5|ULA1_RAT	0.0113917	-0.733003	Not Interesting
g10721	NA	0.719429	-0.333522	Not Interesting
g10722	sp|P78316|NOP14_HUMAN	-0.501742	-0.502893	Not Interesting
g10723	sp|P78316|NOP14_HUMAN	-0.264328	-0.726639	Not Interesting
g10724	NA	-0.290304	-0.679174	Not Interesting
g10725	sp|Q2HJ10|ZNT2_MOUSE	-0.285391	-0.403111	Not Interesting
g1073	sp|Q9Y6X9|MORC2_HUMAN	-0.110604	-0.685885	Not Interesting
g10736	sp|P57709|AT2C1_BOVIN	0.658156	0.971227	Not Interesting
g10737	sp|D4AK17|PLCX1_ARTBC	0.182653	-0.565174	Foot
g10738	sp|O93477|SAHHB_XENLA	-0.613631	0.744036	Head
g10739	sp|O75506|HSBP1_HUMAN	1.12027	-0.389487	Foot
g1074	sp|Q9Y6X9|MORC2_HUMAN	0.0298824	-0.381229	Not Interesting
g10740	sp|P41154|HSF_XENLA	-0.569217	-0.258672	Not Interesting
g10742	NA	-1.08447	-1.36072	Not Interesting
g10745	sp|Q10235|ALP11_SCHPO	-1.6802	-1.36192	Not Interesting
g1075	NA	1.12485	0.0422024	Not Interesting
g10750	sp|P61315|G3ST3_MOUSE	-0.612878	-1.23431	Not Interesting
g10762	NA	-0.308372	0.886571	Not Interesting
g10766	sp|Q8BMT9|HHAT_MOUSE	0.124	-1.89619	Not Interesting
g10767	sp|Q9SZW4|HMA2_ARATH	-0.370327	0.0485059	Not Interesting
g1077	sp|F4HRJ4|M3K3A_ARATH	0.218521	0.213285	Not Interesting
g10774	sp|Q9BT88|SYT11_HUMAN	0.708753	-0.0973501	Not Interesting
g10775	NA	0.56888	0.940692	Not Interesting
g10778	sp|Q9HC84|MUC5B_HUMAN	-1.04419	-0.429497	Not Interesting
g10779	sp|Q5EA92|AL14E_BOVIN	0.881923	-0.116975	Not Interesting
g1078	sp|F4HRJ4|M3K3A_ARATH	-0.977195	-0.181171	Not Interesting
g10782	sp|Q60700|M3K12_MOUSE	0.261299	0.0467368	Not Interesting
g10786	NA	1.64486	-1.25664	Foot
g10787	sp|D3ZHA0|FLNC_RAT	-0.802914	-0.87258	Not Interesting
g10788	sp|O60229|KALRN_HUMAN	-1.97838	-1.39425	Not Interesting
g10789	sp|Q8WZ42|TITIN_HUMAN	-2.31523	-1.86641	Not Interesting
g10790	sp|O02827|MYLK_SHEEP	-1.49475	-1.59843	Not Interesting
g10791	NA	0.415238	1.00665	Not Interesting
g10792	sp|Q3UM45|PP1R7_MOUSE	0.818497	-0.625128	Foot
g10793	sp|Q08D99|TM41A_BOVIN	0.140664	-0.415086	Not Interesting
g10794	sp|Q78RX3|SIM12_MOUSE	1.04873	0.400831	Not Interesting
g10796	sp|Q84PB3|IF4G1_ORYSJ	0.545137	-0.173835	Not Interesting
g10797	NA	-1.41716	0.180129	Head
g1080	NA	0.412515	-1.4243	Not Interesting
g10800	sp|Q2TBU3|GOSR1_BOVIN	0.804915	-0.330343	Foot
g10804	sp|Q19980|GCH1_CAEEL	0.213387	-0.869292	Not Interesting
g10806	sp|Q8C811|S35E2_MOUSE	-0.163997	0.139396	Not Interesting
g10810	sp|Q8N8R7|AL14E_HUMAN	-0.196552	-0.0913322	Not Interesting
g10811	NA	-1.39901	1.40145	Not Interesting
g10813	sp|P08579|RU2B_HUMAN	0.0416595	0.54597	Not Interesting
g10815	NA	1.55339	0.40927	Not Interesting
g10817	sp|Q26627|SUREJ_STRPU	-0.502726	-1.11232	Not Interesting
g10818	sp|Q7TN88|PK1L2_MOUSE	-0.297835	-0.783279	Not Interesting
g10819	sp|H2LRU7|PKD2_ORYLA	-0.729725	-1.02629	Not Interesting
g10820	NA	0.260472	1.24178	Not Interesting
g10821	NA	0.201817	-0.358007	Not Interesting
g10822	NA	-0.333111	-0.600937	Not Interesting
g10823	sp|Q7TN88|PK1L2_MOUSE	0.0468956	-0.430178	Not Interesting
g10826	sp|Q95SX7|RTBS_DROME	0.585744	0.446311	Not Interesting
g10827	sp|Q7Z442|PK1L2_HUMAN	0.11715	0.0219115	Not Interesting
g1083	sp|A6H8T2|CASC1_DANRE	0.820068	-1.00644	Not Interesting
g1084	sp|P28021|CSK2B_XENLA	-0.00513738	0.751018	Head
g10840	NA	0.820384	2.27487	Not Interesting
g10843	NA	0.580072	-0.236132	Not Interesting
g10844	NA	0.6304	-0.215916	Not Interesting
g10847	sp|G3V9H8|RET_RAT	-1.14482	-0.158226	Not Interesting
g10848	NA	-0.759179	0.262076	Not Interesting
g10850	NA	-1.81911	-4.0062	Foot
g10852	sp|Q9NRR4|RNC_HUMAN	0.508784	0.150627	Not Interesting
g10853	sp|Q5HZJ0|RNC_MOUSE	1.74364	-0.572808	Foot
g10854	sp|Q4QQY7|TGT_XENLA	-0.0713537	0.258809	Not Interesting
g1086	sp|Q640L5|CCD18_MOUSE	-0.932731	-0.859214	Not Interesting
g10862	NA	-0.182967	0.979673	Not Interesting
g10863	NA	-0.476387	-0.767606	Not Interesting
g10867	sp|A0A0R4I9Y1|R213B_DANRE	-0.709271	-0.853195	Not Interesting
g1087	NA	-0.458353	0.000889898	Not Interesting
g10876	sp|Q0EEE2|PTHD3_MOUSE	0.195356	-0.85024	Not Interesting
g10877	sp|P41565|IDHG1_RAT	0.424432	-0.244209	Not Interesting
g10878	sp|Q4UMH6|Y381_RICFE	-0.676302	0.0578849	Not Interesting
g10882	NA	0.039504	0.530177	Not Interesting
g10886	sp|A8MTA8|F166B_HUMAN	0.240227	-0.0410572	Not Interesting
g10887	sp|Q9Z336|DYLT1_RAT	-1.16596	0.808674	Head
g1089	sp|Q60547|SYCP3_MESAU	-0.223281	0.704507	Not Interesting
g10897	sp|Q61555|FBN2_MOUSE	0.443303	-0.526872	Not Interesting
g109	NA	-0.784483	0.880612	Not Interesting
g1090	sp|Q9BY11|PACN1_HUMAN	-0.613616	-0.745967	Not Interesting
g10902	sp|P21328|RTJK_DROME	1.06865	0.195512	Not Interesting
g10912	sp|A7SLW1|BCAT_NEMVE	-0.0823058	1.20193	Head
g10915	sp|P24288|BCAT1_MOUSE	0.616148	0.419088	Not Interesting
g10925	NA	0.0558355	-0.503126	Not Interesting
g10926	NA	-0.325801	2.1805	Not Interesting
g1093	sp|Q9XSJ0|UCHL5_BOVIN	0.0847003	0.0511209	Not Interesting
g10931	sp|P29027|CHI2_RHIOL	-0.839383	0.496894	Not Interesting
g10932	sp|P29061|CHIB_TOBAC	0.120828	-0.325216	Not Interesting
g10933	sp|Q9Y2H1|ST38L_HUMAN	0.576861	1.16164	Not Interesting
g10935	sp|Q9W0Y8|SCN60_DROME	0.32581	-0.291637	Not Interesting
g10936	NA	1.03286	0.788324	Not Interesting
g10938	sp|Q9R053|SCNBA_MOUSE	0.564963	-0.0682725	Not Interesting
g10943	sp|Q05973|SCN1_HETBL	0.261913	0.360838	Not Interesting
g10944	sp|Q9PSX7|RHOC_CHICK	-1.14245	-0.725008	Not Interesting
g10945	sp|Q9NBX4|RTXE_DROME	0.207369	-0.37109	Not Interesting
g1095	sp|Q9WUP7|UCHL5_MOUSE	-0.782878	0.593892	Not Interesting
g10950	NA	0.196737	0.315061	Not Interesting
g10953	sp|Q66KV4|BAFB_XENLA	1.37838	-0.556825	Foot
g10954	sp|Q9CQ71|RFA3_MOUSE	-0.654826	0.95419	Head
g10955	sp|B3EWZ3|CADN_ACRMI	0.350527	0.156252	Not Interesting
g10959	sp|Q9CYL5|GAPR1_MOUSE	1.32324	2.38839	Not Interesting
g1096	sp|Q63429|UBC_RAT	0.360827	1.15906	Head
g10961	sp|Q9CYL5|GAPR1_MOUSE	-1.86615	-1.78413	Not Interesting
g10962	NA	-0.323233	-0.826668	Not Interesting
g10965	sp|Q5HZM1|EIF1A_XENLA	-0.169724	0.207283	Not Interesting
g10967	NA	3.31409	3.28838	Not Interesting
g1097	NA	0.0647253	1.23385	Not Interesting
g10974	sp|Q7M6Z4|KIF27_MOUSE	0.0415369	-0.7301	Not Interesting
g10976	sp|Q5XJX0|JGN1A_DANRE	0.275521	0.215381	Not Interesting
g10980	sp|Q9H8X2|IPPK_HUMAN	0.265087	-1.16183	Not Interesting
g10982	sp|Q05086|UBE3A_HUMAN	0.275169	-0.496964	Not Interesting
g10986	NA	1.61911	1.49002	Not Interesting
g10987	sp|P35546|RET_MOUSE	-0.267239	-0.143616	Not Interesting
g1099	sp|Q9JHX4|CASP8_RAT	0.41388	-1.18163	Not Interesting
g10995	sp|D2IYS2|TORSO_BOMMO	0.282292	-0.144731	Not Interesting
g10998	NA	-0.0247983	-0.896154	Not Interesting
g1100	sp|O89110|CASP8_MOUSE	0.73362	-0.270878	Not Interesting
g11003	sp|P25472|GUND_CLOCE	0.608062	0.243216	Not Interesting
g11005	sp|Q6NT16|S18B1_HUMAN	0.716541	1.19136	Not Interesting
g11008	sp|Q3ULD5|MCCB_MOUSE	0.334079	0.187303	Not Interesting
g11016	NA	1.03083	1.23618	Not Interesting
g11017	sp|P47736|RPGP1_HUMAN	0.00227044	-0.140153	Not Interesting
g11018	sp|Q9Y6N7|ROBO1_HUMAN	-0.295465	0.0940915	Not Interesting
g11019	sp|Q9MZD1|S17A5_SHEEP	0.816104	-0.32953	Foot
g11020	sp|Q99PD4|ARC1A_RAT	-0.264949	0.709415	Head
g11021	sp|O76075|DFFB_HUMAN	2.76558	2.6536	Not Interesting
g11022	sp|Q9H6U8|ALG9_HUMAN	0.346645	-0.0763003	Not Interesting
g11023	sp|B2GUZ1|UBP4_RAT	-0.789458	-0.299698	Not Interesting
g11024	NA	-0.382999	-0.0244317	Not Interesting
g11025	NA	-0.20739	-0.250034	Not Interesting
g11029	NA	-0.0534961	-0.718281	Not Interesting
g11030	NA	-0.111711	-0.187395	Not Interesting
g11039	NA	0.366439	0.400516	Not Interesting
g11040	sp|Q5R8I6|TBC23_PONAB	0.619164	0.264162	Not Interesting
g11041	sp|Q6PBU5|GRT1A_DANRE	-0.36301	-0.26229	Not Interesting
g11042	sp|P50591|TNF10_HUMAN	0.436685	-0.475448	Not Interesting
g11044	sp|P98073|ENTK_HUMAN	1.53544	0.20474	Not Interesting
g11045	sp|Q80TQ2|CYLD_MOUSE	-0.00974375	-0.458857	Not Interesting
g11048	sp|Q64077|NK2R_CAVPO	1.30947	-1.50275	Not Interesting
g11056	NA	-0.970164	-0.783721	Not Interesting
g11058	sp|C4R7Z3|C9MT_KOMPG	-0.266089	0.0185269	Not Interesting
g11059	sp|Q9BQI7|PSD2_HUMAN	-0.421905	-0.467092	Not Interesting
g1106	sp|P55210|CASP7_HUMAN	0.0359752	0.120213	Not Interesting
g11061	NA	0.587324	-0.0830288	Not Interesting
g11062	sp|Q9H4G4|GAPR1_HUMAN	0.0955974	0.377714	Not Interesting
g11063	sp|Q2PFD7|PSD3_MOUSE	-0.435324	-0.26174	Not Interesting
g11064	sp|Q9BXC9|BBS2_HUMAN	-0.0241753	0.407607	Not Interesting
g11066	NA	-1.64014	2.57181	Not Interesting
g11068	sp|Q9BXC9|BBS2_HUMAN	-0.458031	0.864653	Not Interesting
g11069	sp|Q9VAI0|GNA1_DROME	1.78912	0.93545	Not Interesting
g11070	sp|Q5TCZ1|SPD2A_HUMAN	0.356337	-0.280352	Not Interesting
g11071	NA	0.800625	0.02601	Not Interesting
g11091	sp|Q92519|TRIB2_HUMAN	1.03512	0.299921	Not Interesting
g11092	sp|O97902|ASAP1_BOVIN	-0.711817	-0.37593	Not Interesting
g11093	sp|Q9QWY8|ASAP1_MOUSE	-0.398439	-0.396293	Not Interesting
g11094	sp|Q9MYS6|KCNQ1_RABIT	0.366983	0.257699	Not Interesting
g11095	sp|P97494|GSH1_MOUSE	-0.773465	-0.821084	Not Interesting
g111	NA	0.295717	0.463592	Not Interesting
g11102	NA	-0.117095	-0.201846	Not Interesting
g11103	NA	-0.168947	-0.656178	Not Interesting
g11105	sp|D4A7U2|CARTF_RAT	1.31423	0.459773	Not Interesting
g11106	NA	1.34832	0.181369	Foot
g11111	sp|Q3EAQ5|PTR36_ARATH	-0.79153	-0.475317	Not Interesting
g11117	sp|O05218|YWRD_BACSU	-0.296138	-0.197982	Not Interesting
g11119	NA	-0.428725	-0.931682	Not Interesting
g11120	NA	1.94371	0.593322	Not Interesting
g11122	sp|P00534|ERBB_ALV	-0.378387	-0.846419	Not Interesting
g11130	sp|B2KNH9|LEC_DENFN	7.83532	7.53695	Not Interesting
g11131	sp|Q03380|COMI_DICDI	0.542381	1.67011	Not Interesting
g11132	sp|Q03380|COMI_DICDI	-1.1405	0.342679	Not Interesting
g11134	NA	-0.385274	-0.79957	Not Interesting
g11135	NA	-3.05113	1.50917	Head
g11136	sp|Q7Z769|S35E3_HUMAN	0.689925	-0.212865	Not Interesting
g11137	sp|Q17RP2|TIGD6_HUMAN	0.10934	0.627325	Not Interesting
g11138	sp|Q24352|GBRAL_DROME	0.218301	0.228402	Not Interesting
g11145	sp|Q94900|GLUCL_DROME	0.745902	0.0479313	Not Interesting
g11147	sp|P69141|H2A_STRPU	0.935115	0.269072	Not Interesting
g11148	sp|Q9P2K2|TXD16_HUMAN	0.255857	-0.00762288	Not Interesting
g1115	sp|P35546|RET_MOUSE	-1.53018	-0.330554	Head
g11150	sp|Q8CJG0|AGO2_MOUSE	-0.264604	0.00297494	Not Interesting
g11153	sp|O77503|AGO2_RABIT	-1.51405	0.74017	Not Interesting
g11156	sp|Q32P51|RA1L2_HUMAN	0.395959	-0.460785	Foot
g11157	sp|Q5XJS5|THOC6_DANRE	0.139469	-0.106376	Not Interesting
g1116	sp|P33497|RYK_AVIR3	-0.914547	-0.546346	Not Interesting
g11167	NA	0.140883	0.0609731	Not Interesting
g11168	sp|A4IF69|NHLC2_BOVIN	0.766879	0.559715	Not Interesting
g11169	sp|Q5ZI67|NHLC2_CHICK	0.688293	0.228231	Not Interesting
g1117	NA	0.0852346	-1.15994	Not Interesting
g11170	sp|Q66T02|PKHG5_MOUSE	0.863676	0.0442292	Not Interesting
g11175	NA	0.306033	1.05289	Not Interesting
g1118	sp|Q8NDA2|HMCN2_HUMAN	-0.904814	-0.620032	Not Interesting
g11184	sp|Q9UBH6|XPR1_HUMAN	0.380367	0.0935385	Not Interesting
g11187	NA	-0.696252	-0.868695	Not Interesting
g1119	NA	-0.361191	-0.331508	Not Interesting
g11192	sp|A7SBN6|ZGPAT_NEMVE	-0.146801	-0.340776	Not Interesting
g11194	sp|Q5IS35|TPC_MACFA	0.383142	0.0718426	Not Interesting
g11195	sp|Q5ZM96|QTRT2_CHICK	0.491232	-0.311152	Not Interesting
g11196	sp|Q8TAC1|RFESD_HUMAN	-0.754832	-0.0390242	Not Interesting
g11197	NA	-0.0311736	-1.17676	Not Interesting
g11199	sp|Q9ESV0|DDX24_MOUSE	-0.48188	-0.434841	Not Interesting
g112	sp|Q24488|ROR1_DROME	-0.136106	-0.1012	Not Interesting
g1120	sp|Q3UM18|LSG1_MOUSE	0.0523107	0.275101	Not Interesting
g11201	NA	0.599802	-0.216543	Not Interesting
g11203	sp|Q5RDL2|DDX24_PONAB	-0.651156	-0.784663	Not Interesting
g11204	sp|Q54TR1|CFAD_DICDI	-0.0852473	-0.317503	Not Interesting
g11206	sp|Q552M5|GEFY_DICDI	-0.750563	-0.710073	Not Interesting
g1121	sp|Q9CYC6|DCP2_MOUSE	0.123813	-0.174009	Not Interesting
g11210	sp|Q14DH7|ACSS3_MOUSE	-0.455719	0.209931	Not Interesting
g11212	sp|Q8BUV8|GP107_MOUSE	0.301232	-0.576279	Not Interesting
g11214	NA	-1.06334	0.607105	Not Interesting
g11218	sp|Q5R513|MPPA_PONAB	-0.205471	0.378332	Not Interesting
g11219	sp|Q6NWD4|TIM50_DANRE	-0.401625	0.0636015	Not Interesting
g1122	NA	1.44321	0.340046	Not Interesting
g11220	sp|Q91XA9|CHIA_MOUSE	0.301933	0.504997	Not Interesting
g11221	sp|Q13231|CHIT1_HUMAN	0.432534	0.296418	Not Interesting
g11222	sp|Q6RY07|CHIA_RAT	-0.277532	0.130632	Not Interesting
g11224	NA	-0.562377	-0.721442	Not Interesting
g11226	sp|U3JAG9|CP131_DANRE	-2.47352	0.535809	Head
g11228	sp|U3JAG9|CP131_DANRE	-0.699945	-0.290636	Not Interesting
g11229	sp|U3JAG9|CP131_DANRE	-0.84807	0.540536	Not Interesting
g11230	sp|P21328|RTJK_DROME	-0.609615	-0.19104	Not Interesting
g11231	sp|U3JAG9|CP131_DANRE	-0.44734	-0.529064	Not Interesting
g11232	NA	0.446713	-0.580926	Not Interesting
g11234	sp|Q8K0V4|CNOT3_MOUSE	-0.132	-0.276398	Not Interesting
g11236	sp|Q8K596|NAC2_MOUSE	-0.209221	0.182185	Not Interesting
g1125	sp|Q00G26|PLIN5_HUMAN	1.88294	2.57521	Not Interesting
g11258	sp|Q68EX9|CHID1_XENLA	-0.0726052	0.500309	Not Interesting
g11259	sp|Q7Z4G4|TRM11_HUMAN	0.471472	-0.268196	Not Interesting
g11260	sp|Q6YJI5|TRM11_CHICK	-0.306799	-0.0143453	Not Interesting
g11261	NA	-0.802384	-0.785228	Not Interesting
g11265	sp|P0CT39|TF26_SCHPO	2.35343	1.82513	Not Interesting
g11266	sp|Q9NTI2|AT8A2_HUMAN	-0.420918	-0.0709814	Not Interesting
g11267	sp|Q9NTI2|AT8A2_HUMAN	0.284727	-0.764772	Not Interesting
g11268	sp|Q9NTI2|AT8A2_HUMAN	-1.65602	-0.147879	Head
g11269	sp|Q6NYV5|SP30L_DANRE	1.01638	0.0330488	Not Interesting
g1127	sp|Q9NXR5|ANR10_HUMAN	0.169589	0.331296	Not Interesting
g11270	sp|P58797|NXF1_COTJA	0.135183	-0.386309	Not Interesting
g11271	sp|Q502W6|VWA3B_HUMAN	-0.402164	-1.31762	Not Interesting
g11272	NA	-1.09374	-1.48078	Not Interesting
g11273	sp|Q8CG64|FKRP_MOUSE	0.434183	-0.340278	Not Interesting
g11274	sp|Q96AG4|LRC59_HUMAN	0.86899	0.422728	Not Interesting
g11275	sp|P62329|TYB4_RAT	-1.30686	1.21812	Head
g11276	sp|Q9NP78|ABCB9_HUMAN	0.11737	-0.892359	Not Interesting
g11277	sp|Q8WXW3|PIBF1_HUMAN	-0.810166	-0.816366	Not Interesting
g11284	sp|Q8WXW3|PIBF1_HUMAN	-0.639301	-0.778566	Not Interesting
g11287	sp|O88809|DCX_MOUSE	-0.0742048	-0.305289	Not Interesting
g11288	sp|Q9C098|DCLK3_HUMAN	-0.29763	0.512723	Head
g11289	NA	-0.625859	-0.264239	Not Interesting
g11293	sp|Q8N6Q8|MET25_HUMAN	-0.0175585	-0.605583	Not Interesting
g11295	sp|Q99999|G3ST1_HUMAN	-0.0907154	-0.657498	Not Interesting
g11296	sp|Q96SW2|CRBN_HUMAN	-0.537176	0.171344	Not Interesting
g11297	sp|Q0IIF7|UBP14_BOVIN	0.388354	-0.416936	Not Interesting
g11298	sp|P40826|UBP14_RABIT	0.304097	0.573747	Not Interesting
g11299	sp|Q06831|SOX4_MOUSE	0.790253	0.582379	Not Interesting
g11300	sp|B4LVU6|PDE6_DROVI	-1.25203	-0.710947	Not Interesting
g11301	sp|Q7T1N4|ASIC1_OPSTA	-0.267238	-0.821238	Not Interesting
g11302	sp|P55926|ASIC1_RAT	-1.33385	-0.770287	Not Interesting
g11303	sp|Q6NXK8|ASIC1_MOUSE	0.0525504	-0.417287	Not Interesting
g11305	sp|P57721|PCBP3_HUMAN	0.342185	0.638471	Not Interesting
g11309	sp|Q91628|ORC2_XENLA	-0.882006	0.0850287	Not Interesting
g11310	NA	0.676507	-0.244264	Not Interesting
g11311	NA	1.61089	-0.827744	Foot
g11312	NA	-0.240106	-0.578889	Not Interesting
g11313	NA	1.12535	-0.623674	Foot
g11314	NA	0.994245	-0.423596	Not Interesting
g11315	sp|Q496Z0|ELP2_RAT	0.216397	0.30889	Not Interesting
g1132	NA	-0.598919	-1.39337	Not Interesting
g11327	sp|Q8BHY3|ANO1_MOUSE	0.361988	-0.0503109	Not Interesting
g11330	sp|Q9KWN0|AHV_ACTSK	1.05202	2.45188	Head
g11334	NA	1.27147	0.151875	Not Interesting
g11338	NA	-0.170417	-0.72146	Not Interesting
g1134	sp|Q8TC12|RDH11_HUMAN	0.920204	-0.661169	Not Interesting
g11342	NA	-1.29563	-0.0261611	Not Interesting
g11343	NA	0.112476	-0.194072	Not Interesting
g11344	sp|A5WFR0|PIF1_PSYWF	0.224328	0.924198	Not Interesting
g11345	NA	-0.207015	0.861943	Not Interesting
g11347	sp|Q7RTR2|NLRC3_HUMAN	0.882375	-0.607979	Not Interesting
g1135	sp|Q8TC12|RDH11_HUMAN	0.296247	0.263945	Not Interesting
g11351	sp|Q7SIB2|CO4A1_BOVIN	0.954312	1.47412	Not Interesting
g11352	sp|P08120|CO4A1_DROME	1.99833	0.602379	Foot
g11353	sp|Q4ZJM7|OTOL1_MOUSE	1.67038	0.828372	Foot
g11354	sp|P05099|MATN1_CHICK	1.04263	0.843151	Not Interesting
g11355	sp|P27393|CO4A2_ASCSU	1.51943	0.738893	Not Interesting
g11358	NA	2.8945	0.528976	Foot
g1136	sp|Q8TC12|RDH11_HUMAN	0.234062	0.13524	Not Interesting
g11361	sp|Q7TNH6|NPHP3_MOUSE	-0.919488	-1.06223	Not Interesting
g11363	sp|P35520|CBS_HUMAN	-1.39159	-1.61976	Not Interesting
g11366	sp|P35520|CBS_HUMAN	-0.443035	-0.00764506	Not Interesting
g11367	sp|P22682|CBL_MOUSE	-0.216908	-0.233883	Not Interesting
g11369	NA	0.604642	-0.801895	Foot
g11370	sp|O95373|IPO7_HUMAN	-3.96533	4.57004	Head
g11371	sp|P52486|UBCD4_DROME	-0.556658	1.21946	Head
g11372	sp|P52486|UBCD4_DROME	0.0420218	-0.320862	Not Interesting
g11373	sp|Q54CS8|PEX6_DICDI	-0.448958	-0.860045	Not Interesting
g1138	sp|Q96NR8|RDH12_HUMAN	0.766805	0.438813	Not Interesting
g1139	NA	0.698462	0.717598	Not Interesting
g11390	NA	0.667336	-1.16053	Not Interesting
g11391	sp|Q3ZKN0|S27A1_BOVIN	-0.260466	-0.188697	Not Interesting
g11392	sp|O96024|B3GT4_HUMAN	-0.509112	-0.18411	Not Interesting
g11394	sp|Q9C0J1|B3GN4_HUMAN	0.901584	0.111174	Not Interesting
g11395	sp|Q9R087|GPC6_MOUSE	0.676971	0.120531	Not Interesting
g11396	NA	0.352936	-0.86003	Foot
g11397	sp|P79384|PCCB_PIG	0.23566	0.216773	Not Interesting
g11398	sp|Q7SXW3|LRC40_DANRE	1.9095	1.62745	Not Interesting
g11399	sp|Q58D84|FSTL1_BOVIN	0.500616	-0.10236	Not Interesting
g1140	sp|G3V9H8|RET_RAT	-0.828766	-0.718706	Not Interesting
g11400	sp|Q9Y2G3|AT11B_HUMAN	0.000847075	0.18323	Not Interesting
g11402	NA	-0.0910294	-0.591878	Not Interesting
g11403	NA	0.228047	-0.500025	Not Interesting
g11406	sp|P29183|LIPP_HORSE	-0.334276	0.207178	Not Interesting
g11408	sp|Q9Z254|GIPC1_RAT	-0.107033	0.133245	Not Interesting
g1141	sp|D2IYS2|TORSO_BOMMO	-0.472331	-0.765278	Not Interesting
g11431	sp|P23468|PTPRD_HUMAN	-0.426292	-0.430434	Not Interesting
g11432	sp|Q64487|PTPRD_MOUSE	-0.456964	-0.0914471	Not Interesting
g11433	NA	-0.515052	-0.218473	Not Interesting
g11434	sp|P62489|RPB7_RAT	-0.567902	0.425176	Not Interesting
g11435	sp|Q96PM5|ZN363_HUMAN	-0.239634	-0.200253	Not Interesting
g11436	sp|Q95SX7|RTBS_DROME	0.828796	-0.0653214	Not Interesting
g11437	sp|Q96PM5|ZN363_HUMAN	-0.242488	-0.0860912	Not Interesting
g11438	sp|Q95SX7|RTBS_DROME	1.67618	0.47823	Not Interesting
g11439	NA	0.522233	-0.031301	Not Interesting
g1144	sp|Q9JHU4|DYHC1_MOUSE	-0.153583	-0.583607	Not Interesting
g11440	sp|Q95SX7|RTBS_DROME	-0.420345	-1.15201	Not Interesting
g11441	sp|Q61083|M3K2_MOUSE	0.145118	-0.503562	Not Interesting
g11443	sp|O93602|ATF2_CHICK	0.195926	0.0451052	Not Interesting
g11444	sp|Q9H7M6|ZSWM4_HUMAN	-2.02665	0.257877	Head
g11446	NA	-0.167069	-0.0802589	Not Interesting
g11455	NA	0.58896	0.421574	Not Interesting
g11458	NA	0.697844	0.190458	Not Interesting
g1146	sp|Q498D6|FGFR4_RAT	0.289755	-0.901626	Not Interesting
g11464	sp|O14735|CDIPT_HUMAN	-0.208388	0.826192	Not Interesting
g11465	sp|Q5ZKU4|INT2_CHICK	-0.536473	0.0300741	Not Interesting
g11466	sp|P07314|GGT1_RAT	0.182341	0.475124	Not Interesting
g11468	sp|Q8IYT8|ULK2_HUMAN	1.13098	2.14536	Not Interesting
g11469	NA	1.55876	1.74371	Not Interesting
g11470	sp|Q96LW9|ZSC31_HUMAN	1.67678	1.39909	Not Interesting
g11471	sp|P24044|CALM_PLAFA	0.598957	0.596585	Not Interesting
g11472	sp|Q9Y3E5|PTH2_HUMAN	1.21658	0.184898	Not Interesting
g11473	sp|Q9DBR7|MYPT1_MOUSE	0.494056	0.0824668	Not Interesting
g11474	sp|Q9H1D0|TRPV6_HUMAN	0.457078	0.183018	Not Interesting
g11475	NA	0.812286	0.387118	Not Interesting
g11480	NA	2.03093	-0.0469643	Not Interesting
g11481	NA	-3.47989	0.184224	Not Interesting
g11482	sp|Q80WQ9|ZBED4_MOUSE	0.103473	1.85774	Not Interesting
g11483	NA	0.453258	-1.38206	Foot
g11487	NA	-1.10364	-1.19955	Not Interesting
g11492	sp|P16157|ANK1_HUMAN	-0.480933	-0.00745918	Not Interesting
g11494	sp|Q7M3K2|PELET_DROME	1.04023	0.0374178	Not Interesting
g11496	sp|Q505D1|ANR28_MOUSE	-0.596165	-0.0599448	Not Interesting
g11497	sp|Q7ZXE9|TES_XENLA	-0.905972	-0.985622	Not Interesting
g11498	sp|P34743|BTG1_CHICK	0.298249	0.926452	Not Interesting
g11500	sp|Q8VCD5|MED17_MOUSE	-0.167021	-0.69084	Not Interesting
g11501	NA	2.82972	1.4714	Not Interesting
g11502	sp|Q9QYP2|CELR2_RAT	-0.429515	-0.0289195	Not Interesting
g11503	sp|Q58A65|JIP4_MOUSE	-0.227363	0.0753489	Not Interesting
g11504	sp|P16157|ANK1_HUMAN	-1.21709	-0.0105766	Not Interesting
g11505	NA	0.5707	1.04401	Not Interesting
g11506	NA	0.350065	0.0698234	Not Interesting
g11509	sp|O62852|TRPC5_RABIT	-0.377718	-0.755695	Not Interesting
g1151	sp|Q91147|FGFR2_NOTVI	0.239738	-0.0190395	Not Interesting
g11511	sp|P28568|GTR3_CHICK	-0.574275	-0.367909	Not Interesting
g11515	sp|Q05944|HSP70_HYDVU	-0.991482	-0.530381	Not Interesting
g11516	sp|Q86SS6|SYT9_HUMAN	0.803933	-0.0591958	Not Interesting
g11517	sp|P97855|G3BP1_MOUSE	0.0855357	-0.0529259	Not Interesting
g11518	sp|Q2HJF1|RM53_BOVIN	-0.0344026	1.15008	Not Interesting
g11519	sp|A2AVA0|SVEP1_MOUSE	-0.55849	-0.171358	Not Interesting
g11521	sp|Q149N8|SHPRH_HUMAN	-0.392312	-0.575557	Not Interesting
g11525	sp|Q7TPQ3|SHPRH_MOUSE	-0.27648	-0.702414	Not Interesting
g11527	sp|Q149N8|SHPRH_HUMAN	-0.150991	-0.711095	Not Interesting
g11528	sp|P02466|CO1A2_RAT	0.307292	-0.684553	Foot
g11529	sp|P23610|F8I2_HUMAN	0.429128	-0.240594	Not Interesting
g11536	sp|P23610|F8I2_HUMAN	-1.1918	0.113226	Not Interesting
g11539	sp|Q5RCY3|EMP1_PONAB	-0.955737	-0.193207	Not Interesting
g11543	sp|Q24799|MYPH_ECHGR	0.815519	0.355143	Not Interesting
g11545	sp|Q60813|ADM1A_MOUSE	-1.93375	-1.35658	Not Interesting
g11546	sp|Q61072|ADAM9_MOUSE	-1.7857	-1.32531	Not Interesting
g11549	NA	-0.41319	-3.15162	Not Interesting
g1155	sp|Q86HQ2|ABCG8_DICDI	-1.23156	-1.31803	Not Interesting
g11550	sp|F8RKV9|VM39_DRYCN	-1.41219	-1.63214	Not Interesting
g11551	NA	-2.42372	-1.07713	Not Interesting
g11552	sp|Q9NBX4|RTXE_DROME	-1.47076	-1.75053	Not Interesting
g11553	sp|P07996|TSP1_HUMAN	-2.14124	-0.974832	Head
g11554	sp|Q5EA92|AL14E_BOVIN	0.925328	0.646535	Not Interesting
g11555	sp|Q6GPQ6|EDF1_XENLA	-1.67717	1.93829	Head
g11556	sp|Q08603|PGTB2_RAT	0.129851	0.424137	Not Interesting
g11558	sp|Q6DHJ1|TYW3_DANRE	-0.191416	-0.185125	Not Interesting
g11559	sp|Q5R4R9|NDUF4_PONAB	0.637442	0.547785	Not Interesting
g1156	sp|Q3B8D5|KATL2_XENLA	-0.250641	0.12509	Not Interesting
g11560	sp|Q9D9V3|ECHD1_MOUSE	-0.0331904	0.542741	Not Interesting
g11561	sp|Q66I61|CX056_DANRE	0.0894879	0.712979	Not Interesting
g11563	sp|A0JNN3|MED31_BOVIN	1.20818	-0.189602	Not Interesting
g11564	sp|Q5XGI5|WDR83_XENTR	0.325756	0.405024	Not Interesting
g11565	sp|P72745|Y1101_SYNY3	0.671564	-0.287312	Not Interesting
g11566	NA	0.714419	-0.00653354	Not Interesting
g11567	sp|P32780|TF2H1_HUMAN	-0.615115	-0.161593	Not Interesting
g11569	sp|Q2PZL6|FAT4_MOUSE	0.00911441	-0.144951	Not Interesting
g11571	NA	0.849374	-0.010276	Not Interesting
g11572	sp|Q60467|CO5A1_CRILO	1.57093	-0.669433	Foot
g11573	sp|Q6UPE0|CHDH_RAT	0.228182	0.22252	Not Interesting
g11575	sp|Q8BJ64|CHDH_MOUSE	-0.045727	0.184422	Not Interesting
g11576	sp|P0C2X9|AL4A1_RAT	0.505367	-0.343339	Not Interesting
g11577	sp|Q54RA2|AL4A1_DICDI	-0.652859	0.369444	Head
g11578	sp|Q9NQX5|NPDC1_HUMAN	-0.0546827	-0.133881	Not Interesting
g11581	sp|B9EJR8|DAAF5_MOUSE	-0.349335	-0.0944351	Not Interesting
g11587	sp|Q86Y56|DAAF5_HUMAN	-1.15556	0.111354	Not Interesting
g11588	NA	-3.5603	-4.26898	Not Interesting
g11589	NA	-0.536148	-0.321043	Not Interesting
g11590	sp|Q5ZKK5|ODFP2_CHICK	-0.394695	-0.322144	Not Interesting
g11591	sp|A0MSJ1|CRA1B_DANRE	0.406788	-0.435984	Not Interesting
g11593	sp|Q64739|COBA2_MOUSE	0.416124	-0.558393	Not Interesting
g11594	sp|O75884|RBBP9_HUMAN	0.128202	0.434403	Not Interesting
g11595	sp|Q91VB4|HPS3_MOUSE	0.244566	-0.709138	Not Interesting
g11596	NA	0.23495	0.317574	Not Interesting
g11602	sp|Q6PAR5|GAPD1_MOUSE	0.117662	0.343483	Not Interesting
g11603	sp|Q6UPE0|CHDH_RAT	-0.131862	0.342586	Not Interesting
g11604	NA	-0.199026	-0.797144	Not Interesting
g11607	sp|Q3TQI7|CI078_MOUSE	0.181654	0.401056	Not Interesting
g1161	NA	-0.0292424	0.227154	Not Interesting
g11610	sp|P21328|RTJK_DROME	0.793529	-0.25159	Not Interesting
g11611	sp|C6KFA3|AGRG6_DANRE	0.13778	0.68754	Not Interesting
g11612	sp|Q8IZF6|AGRG4_HUMAN	1.34207	0.665429	Not Interesting
g11615	NA	1.44277	-1.99193	Not Interesting
g1162	NA	2.1769	-0.18061	Not Interesting
g11632	sp|Q9R160|ADA24_MOUSE	-1.2467	-0.597777	Not Interesting
g11633	sp|Q96RW7|HMCN1_HUMAN	-1.70656	-0.29492	Head
g11634	sp|Q61824|ADA12_MOUSE	-0.844308	-0.898283	Not Interesting
g11635	sp|Q13443|ADAM9_HUMAN	-1.66666	-0.558292	Not Interesting
g11636	NA	0.365392	-1.16571	Not Interesting
g11658	sp|P48727|GLC7B_CAEEL	0.2302	0.305488	Not Interesting
g11659	sp|Q9NQG7|HPS4_HUMAN	0.233622	0.105435	Not Interesting
g11669	sp|A6QLC7|TPC11_BOVIN	0.46304	0.380082	Not Interesting
g11670	sp|Q4FAT7|BGLR_PIG	-0.127064	0.351072	Not Interesting
g11673	sp|Q7T0Q5|NOL10_XENLA	-0.394813	-0.521655	Not Interesting
g11674	sp|P97852|DHB4_RAT	-0.0633554	-0.111314	Not Interesting
g11678	sp|P51659|DHB4_HUMAN	-0.372984	0.259778	Head
g11680	sp|P50430|ARSB_RAT	-0.280411	0.805159	Head
g11682	sp|P50430|ARSB_RAT	0.48119	0.666034	Not Interesting
g11683	sp|Q5FYB0|ARSJ_HUMAN	-0.0110206	-0.125303	Not Interesting
g11688	sp|P21328|RTJK_DROME	0.424425	0.248982	Not Interesting
g11692	sp|Q9JJC6|RIPL1_MOUSE	0.540575	0.895402	Not Interesting
g11693	sp|Q9M0A7|GGP1_ARATH	0.997296	0.535898	Not Interesting
g11694	sp|P39921|TPM1_HYDVU	-1.07324	0.797498	Head
g11696	sp|P39921|TPM1_HYDVU	-1.23539	-0.79168	Not Interesting
g11697	sp|P55112|NAS4_CAEEL	0.332389	0.694599	Not Interesting
g11698	sp|P55112|NAS4_CAEEL	1.39175	3.67773	Not Interesting
g11699	sp|P70403|CASP_MOUSE	-0.370707	0.03516	Not Interesting
g1170	sp|A0JMA9|KATL2_XENTR	-0.203877	-0.318143	Not Interesting
g11702	sp|Q13948|CASP_HUMAN	-0.185198	-0.618689	Not Interesting
g11703	sp|Q6NW29|RWDD4_HUMAN	0.0245215	-0.0742107	Not Interesting
g11704	sp|Q8CIN9|RFFL_RAT	0.0560578	-0.0497323	Not Interesting
g11708	sp|Q99KR6|RNF34_MOUSE	0.815684	-0.804091	Foot
g1171	sp|Q9R1P4|PSA1_MOUSE	0.217185	0.333261	Not Interesting
g11711	NA	-0.25221	0.444442	Not Interesting
g11714	sp|Q9HCF6|TRPM3_HUMAN	-0.300652	-0.349541	Not Interesting
g11717	sp|P55011|S12A2_HUMAN	0.148333	0.0709525	Not Interesting
g11718	NA	1.99607	0.868571	Not Interesting
g11723	sp|Q19269|NAS14_CAEEL	0.135931	-0.152316	Not Interesting
g11725	sp|P62997|TRA2B_RAT	0.123929	0.284361	Not Interesting
g11726	sp|Q96KC8|DNJC1_HUMAN	0.518791	0.392644	Not Interesting
g11727	sp|Q61712|DNJC1_MOUSE	-0.319106	1.13662	Not Interesting
g11728	sp|P49393|RS13_XENLA	0.517297	0.443838	Not Interesting
g11729	sp|P17220|PSA2_RAT	0.456586	0.0497763	Not Interesting
g1173	sp|C0HBB2|GLMP_SALSA	0.541821	-0.109673	Not Interesting
g11730	sp|P25787|PSA2_HUMAN	-0.27751	0.886216	Head
g11731	sp|Q05722|CO9A1_MOUSE	0.059563	-0.0829489	Not Interesting
g11732	NA	-2.37974	1.55548	Not Interesting
g11733	sp|P42297|YXIE_BACSU	1.16314	-0.35329	Not Interesting
g11734	sp|P69341|PARN_BOVIN	0.360539	-0.677396	Not Interesting
g11737	sp|E7FDW8|TRD7B_DANRE	-1.69404	0.571674	Not Interesting
g11739	sp|Q8NAT2|TDRD5_HUMAN	-0.44953	-0.749643	Not Interesting
g1174	sp|O15230|LAMA5_HUMAN	-0.576022	0.227632	Not Interesting
g11740	sp|Q9DE14|ATR_XENLA	-0.331537	-0.589843	Not Interesting
g11742	sp|Q9DE14|ATR_XENLA	-0.442305	-0.456336	Not Interesting
g11744	NA	-0.604721	-0.0166389	Not Interesting
g11745	sp|Q90623|MYPT1_CHICK	-0.111701	0.5244	Not Interesting
g11748	sp|Q20191|NAS13_CAEEL	0.150265	0.62134	Not Interesting
g11749	sp|P49696|SYVC_TAKRU	-0.200476	-0.0923335	Not Interesting
g1175	sp|A6QNK1|G3ST1_BOVIN	0.112742	-0.134855	Not Interesting
g11750	sp|P49696|SYVC_TAKRU	-0.361729	0.0113777	Not Interesting
g11752	NA	0.0711726	-0.267128	Not Interesting
g11753	NA	0.439735	0.251167	Not Interesting
g11755	NA	-0.197836	-0.321425	Not Interesting
g11757	NA	1.09413	-0.717442	Foot
g11758	sp|Q29IM7|CASP8_DROPS	2.08496	0.838891	Not Interesting
g1176	sp|P07942|LAMB1_HUMAN	-0.363478	0.0247041	Not Interesting
g11761	sp|Q9JHX4|CASP8_RAT	-0.178949	0.0945572	Not Interesting
g11763	sp|F6XZJ7|SAM15_MOUSE	0.375731	-0.361163	Not Interesting
g11764	sp|Q6P2Z3|FOXI1_XENTR	-0.336486	0.151641	Not Interesting
g11765	sp|P54366|GSC_DROME	-1.05913	-2.22536	Not Interesting
g11766	sp|O43916|CHST1_HUMAN	0.736183	-0.288914	Foot
g11767	sp|Q7ZUS1|VRK1_DANRE	1.49293	1.05616	Not Interesting
g11769	sp|Q7M3K2|PELET_DROME	2.46349	1.92299	Not Interesting
g1177	sp|Q00174|LAMA_DROME	-0.440788	0.0785783	Not Interesting
g11774	sp|Q7ZU45|TTC25_DANRE	-0.998597	-0.576003	Not Interesting
g11779	sp|Q7ZU45|TTC25_DANRE	-0.914864	-0.635817	Not Interesting
g11780	sp|Q62445|SP4_MOUSE	-1.03582	-2.10458	Foot
g11781	sp|Q15750|TAB1_HUMAN	-0.172251	0.0531377	Not Interesting
g11785	sp|Q8CF89|TAB1_MOUSE	0.248949	0.0712011	Not Interesting
g11786	sp|P61315|G3ST3_MOUSE	1.87005	1.20923	Not Interesting
g11787	sp|Q9NSI2|F207A_HUMAN	0.992092	-0.0973044	Not Interesting
g11789	sp|P54922|ADPRH_HUMAN	0.31752	0.213355	Not Interesting
g1179	sp|Q8TF46|DI3L1_HUMAN	-0.100004	0.0866251	Not Interesting
g11790	sp|Q5I0M0|SETMR_RAT	-0.685542	0.750721	Not Interesting
g11791	sp|Q8BG94|COMD7_MOUSE	-0.275896	0.0735207	Not Interesting
g11792	sp|Q4R5C7|SRP14_MACFA	1.16429	-0.0792405	Foot
g11794	sp|Q9NBX4|RTXE_DROME	0.186364	-0.164148	Not Interesting
g11798	sp|Q8TD10|MIPO1_HUMAN	-0.0535646	0.0923498	Not Interesting
g11799	sp|O73606|KCNG2_CHICK	-0.367872	0.124825	Not Interesting
g118	sp|Q9Z139|ROR1_MOUSE	-0.238465	-0.341426	Not Interesting
g1180	sp|Q5T1V6|DDX59_HUMAN	-0.558185	-0.425004	Not Interesting
g11801	NA	-0.334632	0.379144	Not Interesting
g11803	sp|Q8L7C8|RWA1_ARATH	0.427069	-0.346408	Not Interesting
g11805	NA	-0.562974	-0.590013	Not Interesting
g11808	sp|Q6GMK6|TSN9_DANRE	0.890645	-0.19713	Not Interesting
g11809	sp|Q26499|IM23_SCHHA	0.131693	0.667691	Not Interesting
g1181	sp|Q7ZTY7|USE1_DANRE	-0.0759601	0.313378	Not Interesting
g11811	sp|P53041|PPP5_HUMAN	0.145591	-0.106152	Not Interesting
g11812	sp|Q8IV42|PSTK_HUMAN	-0.299728	-1.36272	Not Interesting
g11816	sp|Q1LU86|F92A1_DANRE	-0.5457	-0.120214	Not Interesting
g11819	sp|Q8K211|COPT1_MOUSE	0.221096	-0.304788	Not Interesting
g11820	sp|Q04202|TCB2_CAEBR	-0.0427212	1.00936	Not Interesting
g11821	sp|Q1LU86|F92A1_DANRE	-1.37558	-0.343115	Not Interesting
g11829	sp|Q7LKY2|ADDH_SCHPO	-0.659784	-0.0928463	Not Interesting
g11831	sp|Q9Y253|POLH_HUMAN	0.191406	-0.53723	Not Interesting
g11833	NA	0.572357	0.672208	Not Interesting
g11839	sp|Q9JJN0|POLH_MOUSE	-0.487565	-0.291604	Not Interesting
g11842	sp|A1A5X2|FBXL7_DANRE	0.847863	-1.07933	Not Interesting
g11845	sp|P29350|PTN6_HUMAN	-0.362903	0.00144257	Not Interesting
g11851	sp|Q95SX7|RTBS_DROME	0.528222	-0.258076	Not Interesting
g11852	sp|Q2TBV5|TF2H2_BOVIN	-0.505116	0.0773845	Not Interesting
g11853	sp|Q26636|CATL_SARPE	-0.872146	-0.984516	Not Interesting
g11855	NA	-1.21744	0.379027	Not Interesting
g11859	sp|A6H639|TCTE1_MOUSE	-0.0553979	0.0810945	Not Interesting
g11860	NA	-4.64125	-4.80273	Not Interesting
g11861	sp|Q5ZKN1|CDK9_CHICK	0.170834	-0.292942	Not Interesting
g11865	NA	-0.21438	0.753746	Not Interesting
g11868	NA	0.0334831	0.199014	Not Interesting
g11869	NA	0.497727	-0.507649	Not Interesting
g11870	sp|Q9NBX4|RTXE_DROME	0.346178	0.0867163	Not Interesting
g11872	sp|Q8AYA3|SLB2_DEIAC	-0.100495	0.104428	Not Interesting
g11873	sp|A7S4N4|SERIC_NEMVE	0.48537	0.193978	Not Interesting
g11874	NA	0.00644993	-1.64983	Not Interesting
g11878	NA	0.457068	-0.205941	Not Interesting
g11879	NA	1.04023	-0.601738	Not Interesting
g11880	sp|Q17RW2|COOA1_HUMAN	0.466935	-0.710887	Foot
g11882	NA	0.193795	0.330207	Not Interesting
g11886	NA	2.70901	1.63927	Not Interesting
g11890	sp|B0FPE9|NLRP3_MACMU	-0.282734	-1.24722	Not Interesting
g11893	NA	0.37168	0.358798	Not Interesting
g11894	sp|Q9ESJ4|SPN90_MOUSE	0.150729	-0.0945432	Not Interesting
g11897	sp|P48809|RB27C_DROME	0.217857	0.6319	Not Interesting
g11898	sp|P48809|RB27C_DROME	0.262897	0.596005	Not Interesting
g11902	sp|D3YXG0|HMCN1_MOUSE	-0.176931	-0.205313	Not Interesting
g11903	sp|Q09575|YRD6_CAEEL	0.676979	-0.450772	Not Interesting
g11904	NA	0.632105	-1.081	Not Interesting
g11905	NA	0.800014	-0.800325	Not Interesting
g11908	sp|P34457|YMD3_CAEEL	-0.200094	-0.205657	Not Interesting
g11915	sp|Q9WVR3|SHIP2_RAT	-0.557644	-0.537339	Not Interesting
g11916	sp|Q8NHP1|ARK74_HUMAN	-0.219276	0.563203	Head
g11917	sp|Q5XII5|WAP53_RAT	-0.843147	-1.04791	Not Interesting
g11920	sp|Q60525|WAP53_MESAU	0.550552	-0.154746	Not Interesting
g11924	sp|Q60525|WAP53_MESAU	0.889667	0.286595	Not Interesting
g11925	sp|Q9BUZ4|TRAF4_HUMAN	-0.795455	-0.211277	Not Interesting
g11927	NA	0.509524	0.136021	Not Interesting
g11928	sp|A4FUD3|U5S1_BOVIN	-0.249286	0.321471	Not Interesting
g11929	sp|Q8WMY2|FPPS_BOVIN	0.420328	0.169298	Not Interesting
g1193	sp|Q15650|TRIP4_HUMAN	-0.00724948	-0.41226	Not Interesting
g11930	sp|Q8IVB4|SL9A9_HUMAN	0.210836	-0.092441	Not Interesting
g11933	sp|Q9QXX8|NUFP1_MOUSE	-0.335586	-0.59424	Not Interesting
g11940	sp|Q641W3|NUFP1_RAT	-0.174796	-0.499341	Not Interesting
g11941	sp|O15042|SR140_HUMAN	-0.542585	-0.0814745	Not Interesting
g11942	sp|Q6PBI8|TM177_DANRE	0.852145	-0.0677603	Not Interesting
g11943	NA	-0.0601461	-0.324882	Not Interesting
g11944	sp|Q8C4U2|TM145_MOUSE	0.560954	-0.683571	Not Interesting
g11946	NA	-0.133312	-0.701073	Foot
g11948	sp|Q02370|NDUA2_BOVIN	-1.71742	1.68015	Head
g11949	NA	-0.209647	-0.40711	Not Interesting
g11950	sp|Q8CFH6|SIK2_MOUSE	0.904831	1.192	Not Interesting
g11951	NA	1.47423	0.105065	Not Interesting
g11952	sp|Q9V3B4|FADD_DROME	-0.361013	0.0908022	Not Interesting
g11956	sp|Q5THJ4|VP13D_HUMAN	-0.468641	-0.455417	Not Interesting
g11957	NA	-0.483149	-0.26791	Not Interesting
g11963	sp|P20241|NRG_DROME	-0.432729	-0.0958453	Not Interesting
g11965	sp|O55005|ROBO1_RAT	0.798599	0.199292	Not Interesting
g11969	sp|D3YXG0|HMCN1_MOUSE	0.680435	0.708887	Not Interesting
g1197	NA	0.39007	0.314112	Not Interesting
g11970	sp|Q6NUB2|CW15A_XENLA	-0.233079	0.527841	Not Interesting
g11971	sp|Q6NZE7|F122B_MOUSE	-1.92766	-0.508616	Head
g11974	sp|P12036|NFH_HUMAN	-1.40103	-1.73353	Not Interesting
g11977	NA	1.12472	0.556517	Not Interesting
g11978	sp|Q5EA92|AL14E_BOVIN	0.202557	-0.276342	Not Interesting
g11979	NA	0.713846	-0.00760166	Not Interesting
g11980	NA	-0.0711118	-1.28682	Not Interesting
g11981	sp|Q9NYG2|ZDHC3_HUMAN	-0.530745	-0.184548	Not Interesting
g11982	sp|Q9R062|GLYG_MOUSE	0.265625	-0.167083	Not Interesting
g11984	sp|Q8R123|FAD1_MOUSE	-1.57885	-1.31282	Not Interesting
g11985	sp|Q711G3|IAH1_RAT	0.299069	0.688659	Not Interesting
g11988	sp|Q54G05|LRRX1_DICDI	-0.918656	-0.136263	Not Interesting
g11989	NA	1.31593	-0.220778	Not Interesting
g1199	sp|P42674|BP10_PARLI	0.25826	0.0619166	Not Interesting
g11994	NA	4.10564	3.32264	Not Interesting
g11995	NA	0.460835	0.97193	Not Interesting
g11996	sp|A5PN43|TM175_DANRE	3.35621	2.96785	Not Interesting
g11999	NA	-0.32376	-0.216628	Not Interesting
g12	NA	1.95177	-0.105374	Not Interesting
g12003	sp|Q7TNH6|NPHP3_MOUSE	0.963584	-1.43127	Foot
g12005	sp|O08726|GALR2_RAT	1.05057	-1.83365	Not Interesting
g1201	sp|Q8C1W1|VASH1_MOUSE	0.510705	-0.481548	Not Interesting
g1202	NA	-0.284653	0.76738	Not Interesting
g12023	sp|Q641A1|GLD2A_XENLA	-0.27952	-0.480585	Not Interesting
g12024	sp|Q4PM12|RL36_IXOSC	-0.22458	0.873825	Head
g12029	sp|P11680|PROP_MOUSE	0.810153	0.268768	Not Interesting
g12030	sp|Q920M9|SIAH1_RAT	-0.185353	-0.0280984	Not Interesting
g12032	sp|Q9P2E2|KIF17_HUMAN	-0.642381	0.163893	Not Interesting
g12033	sp|A7S7F2|BYST_NEMVE	-0.0947638	-0.128422	Not Interesting
g12034	sp|Q8N8Q8|COX18_HUMAN	-0.543903	0.68335	Head
g12035	NA	-0.187269	-0.691422	Not Interesting
g12036	sp|Q5R7D0|COX18_PONAB	0.437779	-0.357021	Not Interesting
g12037	sp|A7S7F2|BYST_NEMVE	-0.652607	-0.0118704	Not Interesting
g12038	NA	-0.366839	0.353976	Not Interesting
g12039	sp|Q505D9|TRI67_MOUSE	0.0492523	0.0288203	Not Interesting
g12040	NA	1.76441	3.07202	Not Interesting
g12043	sp|P26990|ARF6_CHICK	0.514748	0.219223	Not Interesting
g12044	NA	-0.201703	-0.766409	Not Interesting
g12046	sp|Q63150|DPYS_RAT	0.0483262	0.10298	Not Interesting
g12048	sp|P62282|RS11_RAT	-0.0942429	1.14312	Not Interesting
g12050	sp|Q3ZCU0|YK006_HUMAN	3.19328	-1.10001	Not Interesting
g12054	sp|Q6NZZ4|TM107_DANRE	1.12637	0.408353	Not Interesting
g12056	NA	-0.972187	-1.934	Not Interesting
g12057	sp|Q60HC3|HNRPF_MACFA	0.689289	0.340627	Not Interesting
g12058	sp|Q5ZM16|RBM22_CHICK	0.452707	0.461489	Not Interesting
g12059	sp|Q8X034|RL15_NEUCR	-0.00695008	0.239353	Not Interesting
g12061	sp|Q08DQ2|GFPT2_BOVIN	1.797	2.12218	Not Interesting
g12065	sp|Q63035|NLRP6_RAT	0.13218	-1.17162	Not Interesting
g12068	sp|D3YXG0|HMCN1_MOUSE	-0.883877	-0.58709	Not Interesting
g12069	NA	-0.26246	0.13427	Not Interesting
g1207	sp|A5PN43|TM175_DANRE	-0.422172	-0.473003	Not Interesting
g12071	sp|Q9EQU5|SET_MOUSE	0.0964094	0.0997226	Not Interesting
g12073	sp|A2AN08|UBR4_MOUSE	-0.565126	-1.36334	Not Interesting
g12074	sp|Q2TL32|UBR4_RAT	-0.430785	-0.980431	Not Interesting
g12075	sp|Q5T4S7|UBR4_HUMAN	-1.0676	-0.898313	Not Interesting
g12076	sp|A2AN08|UBR4_MOUSE	-0.428155	-1.13592	Not Interesting
g12077	sp|Q5T4S7|UBR4_HUMAN	0.613253	0.721771	Not Interesting
g12078	sp|Q9VE04|RM55_DROME	-0.580814	0.936185	Not Interesting
g1208	sp|A5PN43|TM175_DANRE	1.81027	2.57427	Not Interesting
g12084	sp|P91119|PDE5_CAEEL	-0.399663	-0.136011	Not Interesting
g12085	sp|A8Y1P7|BRE4_CAEBR	0.373226	0.630765	Not Interesting
g12086	NA	0.35626	-0.404074	Foot
g12087	sp|Q8IYG6|LRC56_HUMAN	-0.0858906	-0.3464	Not Interesting
g12091	sp|Q96AE4|FUBP1_HUMAN	0.445553	0.0187188	Not Interesting
g12092	sp|P0DKB4|T3HPD_SACKO	0.509333	0.435042	Not Interesting
g12093	sp|Q8JZK9|HMCS1_MOUSE	-0.25334	-0.664603	Not Interesting
g12094	sp|O18994|GPX5_PIG	-0.229729	-0.290526	Not Interesting
g12095	sp|Q767L0|ABCF1_PIG	-0.314717	0.126889	Not Interesting
g12096	sp|P14173|DDC_RAT	-0.852251	-1.21145	Not Interesting
g12098	sp|Q05910|ADAM8_MOUSE	-0.610432	-0.472948	Not Interesting
g12099	NA	-0.981094	0.0379961	Not Interesting
g12100	sp|P14173|DDC_RAT	-0.888106	-0.459652	Not Interesting
g12109	NA	0.485114	0.0416	Not Interesting
g12119	sp|Q6NZ07|NCLN_DANRE	0.147254	0.0284635	Not Interesting
g1212	NA	-0.409657	-1.09095	Not Interesting
g12120	sp|P50280|MMP7_RAT	0.175575	1.24096	Head
g12122	sp|Q9GLE4|MMP14_BOVIN	0.833247	0.225068	Not Interesting
g12125	sp|Q95NI4|CALM_HALOK	1.63235	2.83414	Not Interesting
g12126	sp|Q08E00|RASLC_BOVIN	3.04451	1.56209	Foot
g12128	sp|Q2PZL6|FAT4_MOUSE	0.429422	-1.04383	Not Interesting
g12131	NA	0.661748	-0.0403437	Not Interesting
g12134	NA	0.114858	-0.735236	Not Interesting
g12137	sp|Q5F480|ITPK1_CHICK	-0.286662	0.432765	Head
g12139	NA	1.24426	-0.265287	Foot
g1214	NA	0.200739	0.979721	Not Interesting
g12142	sp|P21328|RTJK_DROME	2.72411	5.17086	Not Interesting
g12143	NA	-0.01641	1.16443	Head
g12144	sp|Q6AXY4|DPOD2_RAT	-0.62691	0.388787	Not Interesting
g12145	NA	1.21075	0.457313	Not Interesting
g12147	sp|P49004|DPOD2_BOVIN	-0.709395	0.537813	Head
g12148	sp|Q63850|NUP62_MOUSE	-0.820922	0.278633	Head
g12149	sp|P26369|U2AF2_MOUSE	0.453226	0.355842	Not Interesting
g1215	sp|Q8IZD2|KMT2E_HUMAN	-0.169802	-0.452268	Not Interesting
g12150	sp|Q24562|U2AF2_DROME	-0.461314	0.798489	Head
g12151	NA	1.07248	0.796512	Not Interesting
g12154	sp|O75154|RFIP3_HUMAN	-1.02439	-0.422866	Not Interesting
g12156	NA	0.0721176	-0.108019	Not Interesting
g12158	sp|P54394|DING_BACSU	0.763905	0.2808	Not Interesting
g1216	sp|H9BW96|RAB7_EPICO	-0.369694	0.434208	Head
g12161	sp|Q8NDA2|HMCN2_HUMAN	-0.268093	0.0825938	Not Interesting
g12162	NA	0.451916	0.55475	Not Interesting
g12164	sp|Q80SU7|GVIN1_MOUSE	-0.124307	-1.3108	Not Interesting
g12166	sp|C6FG12|NLRC5_ICTPU	0.935583	-0.705563	Not Interesting
g12178	sp|P81274|GPSM2_HUMAN	-0.703188	-0.408919	Not Interesting
g12179	NA	2.17667	0.924368	Not Interesting
g1218	NA	-1.53763	-3.30635	Not Interesting
g12180	sp|P48508|GSH0_RAT	-0.730331	0.230764	Head
g12181	sp|A2BIG9|LSMD1_DANRE	0.10006	0.012154	Not Interesting
g12183	sp|Q9D1A2|CNDP2_MOUSE	-0.0886673	-0.139048	Not Interesting
g12187	sp|Q9D1A2|CNDP2_MOUSE	-0.253664	0.167399	Not Interesting
g12189	sp|Q8ILR9|YPF17_PLAF7	-0.514873	-0.935909	Not Interesting
g12199	NA	0.115389	1.00909	Not Interesting
g12200	sp|Q4R945|TTK_MACFA	-0.262168	-0.719739	Not Interesting
g12201	sp|Q810N6|ANR45_MOUSE	0.167262	0.290477	Not Interesting
g12202	sp|A5PK45|GT251_BOVIN	0.20397	0.241409	Not Interesting
g12203	sp|P13834|GYS1_RABIT	-0.550731	-0.00726006	Not Interesting
g12205	NA	0.181525	-0.332435	Not Interesting
g12207	sp|P21328|RTJK_DROME	0.673164	-0.0446364	Not Interesting
g12208	NA	1.25578	0.56671	Not Interesting
g1221	NA	-0.699376	1.40983	Not Interesting
g12211	sp|Q9GKR6|CAYP2_MACFA	-0.143063	-0.601367	Not Interesting
g12213	sp|B3EWZ3|CADN_ACRMI	0.278606	0.0937518	Not Interesting
g12214	sp|B0V2N1|PTPRS_MOUSE	0.492369	-0.32341	Not Interesting
g12215	sp|O43826|G6PT1_HUMAN	1.05015	-0.6382	Foot
g12217	sp|Q24276|CDC37_DROME	0.154059	-0.157172	Not Interesting
g12218	sp|O57476|CDC37_CHICK	0.567493	-0.0681828	Not Interesting
g12219	sp|A7RNG8|CCD22_NEMVE	-0.432309	-0.5962	Not Interesting
g12220	sp|Q5M843|OGFD3_RAT	0.968269	0.168782	Not Interesting
g12221	NA	1.73329	-0.261625	Not Interesting
g12223	sp|D3ZDI6|MYLIP_RAT	0.247957	0.239423	Not Interesting
g12231	sp|P81439|EQST_ACTEQ	0.127971	0.127401	Not Interesting
g12232	sp|P33402|GCYA2_HUMAN	0.0336039	-0.60725	Not Interesting
g12235	sp|Q04202|TCB2_CAEBR	0.823343	0.602743	Not Interesting
g12236	NA	2.36177	2.57979	Not Interesting
g12237	NA	0.764472	-1.05642	Foot
g12239	sp|B3EWZ3|CADN_ACRMI	-0.654598	-0.552004	Not Interesting
g12245	NA	-0.93922	-0.774813	Not Interesting
g12254	sp|B3EWZ3|CADN_ACRMI	-0.819259	-0.856809	Not Interesting
g12259	sp|Q80ZF8|AGRB3_MOUSE	-0.473581	-0.967705	Not Interesting
g12262	NA	0.522152	0.191453	Not Interesting
g12264	sp|O08585|CLCA_MOUSE	0.598423	0.036205	Not Interesting
g12265	sp|O60469|DSCAM_HUMAN	-1.00099	-0.421402	Not Interesting
g12273	sp|Q9Y3C6|PPIL1_HUMAN	0.104873	0.458657	Not Interesting
g12274	sp|G5ECQ2|FRIZ2_CAEEL	0.340299	1.05701	Not Interesting
g12275	sp|Q2M3R5|S35G1_HUMAN	-0.186264	0.256604	Not Interesting
g12276	sp|Q5M8Y1|SPCS2_XENTR	0.724284	0.111362	Not Interesting
g12277	sp|Q5SRI9|MANEA_HUMAN	0.633578	0.0750015	Not Interesting
g12279	sp|Q6DD38|TRIAB_XENLA	-1.22663	1.98276	Not Interesting
g1228	sp|Q96RW7|HMCN1_HUMAN	0.229229	0.822536	Not Interesting
g12280	sp|Q6TGY8|EMC2_DANRE	0.311936	0.358385	Not Interesting
g12281	sp|P29052|TF2B_DROME	0.207037	0.6066	Not Interesting
g1229	sp|D3YXG0|HMCN1_MOUSE	0.21351	0.270758	Not Interesting
g12290	sp|Q5R886|TF2B_PONAB	-0.213624	0.626294	Not Interesting
g12291	sp|Q96RW7|HMCN1_HUMAN	0.253131	0.325448	Not Interesting
g1230	sp|D3YXG0|HMCN1_MOUSE	0.916631	0.210455	Not Interesting
g12304	NA	1.33217	-0.936483	Not Interesting
g1231	sp|D3YXG0|HMCN1_MOUSE	0.0950624	0.352919	Not Interesting
g12316	sp|Q5RC80|RBM39_PONAB	-0.0681918	0.278139	Not Interesting
g12318	NA	1.41923	0.636394	Not Interesting
g12319	sp|Q9HCK4|ROBO2_HUMAN	0.0229502	-0.522585	Not Interesting
g12322	sp|P40240|CD9_MOUSE	1.86128	1.7974	Not Interesting
g12323	NA	0.0537459	0.152991	Not Interesting
g12326	sp|Q95LP5|AXDN1_MACFA	0.320204	-0.440563	Not Interesting
g12331	sp|Q68F67|DEN1A_XENLA	-0.631124	-0.0689839	Not Interesting
g12332	NA	0.0569326	-0.581093	Not Interesting
g12333	sp|P26186|MGMT_CRIGR	0.413693	-0.136319	Not Interesting
g12334	sp|Q5E9Z7|RPC4_BOVIN	0.182812	0.0678553	Not Interesting
g12335	sp|Q26481|RL5_STYCL	0.138776	0.213761	Not Interesting
g12340	sp|Q76JQ2|FLCN_RAT	-0.665875	-0.157255	Not Interesting
g12341	sp|Q5REW9|ANR27_PONAB	-0.207708	-0.298806	Not Interesting
g12342	sp|Q6TLI9|DRD2_MUSPF	5.40718	6.18741	Not Interesting
g12346	sp|P07199|CENPB_HUMAN	-0.00202393	0.0896458	Not Interesting
g12347	NA	-0.0782765	-0.100956	Not Interesting
g12348	sp|Q6DGN6|SPT2_DANRE	0.191134	-0.242863	Not Interesting
g12350	sp|Q9NBX4|RTXE_DROME	0.313987	-0.000800804	Not Interesting
g12354	NA	-0.324735	-0.364095	Not Interesting
g12355	NA	-1.44937	-2.10766	Not Interesting
g12356	sp|Q6ZQ03|FNBP4_MOUSE	0.191994	0.0114997	Not Interesting
g12357	sp|Q9BXB5|OSB10_HUMAN	-0.25718	0.194794	Not Interesting
g12359	sp|P21328|RTJK_DROME	0.242752	0.146927	Not Interesting
g12362	sp|Q9BXB4|OSB11_HUMAN	0.00922169	-0.0481184	Not Interesting
g12363	NA	-0.0195155	-0.586443	Not Interesting
g12364	sp|A2RUV0|NOTC1_XENTR	-0.92745	-1.51532	Not Interesting
g12369	sp|Q9WUH1|TM115_MOUSE	0.262953	0.0191227	Not Interesting
g12370	sp|P53356|HTK16_HYDVU	0.232968	-0.0116931	Not Interesting
g12371	sp|Q640R7|RAP1B_XENTR	-1.21968	-2.65474	Foot
g12372	sp|Q09930|DIRA_CAEEL	0.463961	0.288679	Not Interesting
g12374	sp|Q01887|RYK_MOUSE	-0.122582	0.0259534	Not Interesting
g12375	sp|Q5F2N2|FUT11_ORYLA	0.381701	-0.0401102	Not Interesting
g12378	sp|Q5F2N2|FUT11_ORYLA	-0.0733847	0.473049	Not Interesting
g12379	sp|P35442|TSP2_HUMAN	0.158968	0.509981	Not Interesting
g12380	NA	0.564715	1.06084	Not Interesting
g12382	sp|D3YXG0|HMCN1_MOUSE	0.253234	-0.047146	Not Interesting
g12385	sp|Q86X83|COMD2_HUMAN	-0.203508	0.787539	Not Interesting
g12387	sp|Q6DF40|LTOR2_XENTR	-1.05162	0.778293	Head
g12390	NA	-0.213241	1.18135	Not Interesting
g12395	sp|Q8C428|TMC7_MOUSE	0.825512	0.193145	Not Interesting
g12396	sp|Q8T5Z4|RS19_BRABE	-0.246656	1.03704	Not Interesting
g12398	sp|Q6DUZ9|TSSC1_GEKJA	-0.329507	0.0309747	Not Interesting
g12399	sp|Q921G8|GCP2_MOUSE	-0.0626284	0.0401869	Not Interesting
g1240	sp|Q96RW7|HMCN1_HUMAN	-0.20548	0.697203	Not Interesting
g12400	NA	1.28743	-0.0335191	Not Interesting
g12401	NA	-0.0309379	-0.0858128	Not Interesting
g12402	sp|Q6DBR4|TIPIN_DANRE	0.615267	-0.181981	Not Interesting
g12403	sp|Q9QXY9|PEX3_MOUSE	0.729276	-0.292713	Not Interesting
g12405	sp|A6H7C2|PEX3_BOVIN	0.998354	-0.0065466	Not Interesting
g12406	sp|Q66PG1|LARG2_DANRE	0.170581	-0.0596026	Not Interesting
g12407	sp|Q17Q91|CHCH7_BOVIN	-0.69247	0.350384	Not Interesting
g12409	sp|Q5W5X9|TTC23_HUMAN	-0.322237	-0.752692	Not Interesting
g12411	sp|Q9DBQ9|SWT1_MOUSE	0.375914	-0.185779	Not Interesting
g12412	sp|B7ZMP1|XPP3_MOUSE	-0.211924	0.499589	Not Interesting
g12413	sp|Q7F2E4|CSB_ORYSJ	-0.0176212	-0.39037	Not Interesting
g12417	sp|Q03468|ERCC6_HUMAN	0.184022	-0.23263	Not Interesting
g12418	sp|Q5R8J8|DNJB4_PONAB	1.81159	1.78866	Not Interesting
g12419	NA	1.1937	-0.962363	Not Interesting
g12420	sp|Q7ZWY2|PIHD1_XENLA	0.490734	-0.000311283	Not Interesting
g12421	NA	-0.0720049	1.11096	Not Interesting
g12422	sp|Q7ZWY2|PIHD1_XENLA	0.501971	-0.370682	Not Interesting
g12425	sp|Q8BUH1|TXN4B_MOUSE	1.07771	-0.207959	Not Interesting
g12431	NA	0.413638	-0.545041	Not Interesting
g12432	NA	0.226782	-0.702496	Not Interesting
g12434	sp|A4GTP4|ELK1_RAT	2.76756	1.19116	Not Interesting
g12439	sp|P41969|ELK1_MOUSE	2.47931	1.24992	Not Interesting
g12440	NA	3.88297	2.02423	Not Interesting
g12441	NA	0.827682	0.281346	Not Interesting
g12447	sp|A4GTP4|ELK1_RAT	1.18989	0.774773	Not Interesting
g12448	sp|O88879|APAF_MOUSE	0.213631	0.589109	Not Interesting
g12449	NA	-0.14354	0.776372	Not Interesting
g12450	NA	2.05008	-0.43596	Not Interesting
g12453	sp|O88879|APAF_MOUSE	-0.0115058	0.241341	Not Interesting
g12455	NA	-0.39942	2.56545	Not Interesting
g12456	sp|Q95SX7|RTBS_DROME	0.715687	0.0857439	Not Interesting
g12458	sp|P0C548|PLPL2_RAT	-0.580579	-1.90435	Not Interesting
g12459	sp|Q16658|FSCN1_HUMAN	-0.244085	0.101784	Not Interesting
g12460	sp|P97292|HRH2_MOUSE	0.222436	-1.37014	Foot
g12461	sp|O18405|SURF4_DROME	0.338166	0.492187	Not Interesting
g12462	sp|P08935|CYT_BITAR	1.56733	-0.0496471	Foot
g12463	NA	-0.999758	-1.29034	Not Interesting
g12464	sp|Q9VBP3|TNKS_DROME	-1.24986	-3.70493	Not Interesting
g12465	sp|Q1LZB6|CAPR1_BOVIN	0.160241	-0.160161	Not Interesting
g12466	sp|P54825|LMIP_RAT	0.336065	-0.533337	Not Interesting
g12468	sp|Q5SRE5|NU188_HUMAN	0.0500754	-0.147098	Not Interesting
g12469	NA	1.00179	-0.338712	Foot
g12470	NA	-2.61271	2.12679	Not Interesting
g12471	NA	2.27907	1.85677	Not Interesting
g12474	NA	1.93891	0.459179	Not Interesting
g12475	sp|Q60HG7|CGL_MACFA	-0.0365697	0.728254	Head
g12478	sp|Q9CYL5|GAPR1_MOUSE	1.9326	0.619397	Not Interesting
g12479	sp|Q9SWW5|PCS1_WHEAT	-0.375176	0.633409	Not Interesting
g12487	NA	-0.803734	-0.0607185	Not Interesting
g12492	NA	0.902419	-0.132545	Not Interesting
g12494	NA	0.379904	-0.102492	Not Interesting
g12495	sp|P10394|POL4_DROME	0.490163	-0.149024	Not Interesting
g12499	sp|P42674|BP10_PARLI	-0.0616406	-0.225461	Not Interesting
g12506	sp|P55115|NAS15_CAEEL	0.534086	0.0945336	Not Interesting
g12509	sp|Q8N0Z3|SPICE_HUMAN	-0.416736	-0.642559	Not Interesting
g12510	sp|Q16739|CEGT_HUMAN	-0.221101	-0.335722	Not Interesting
g12516	sp|Q32P44|EMAL3_HUMAN	-0.273421	-1.273	Not Interesting
g12517	NA	-0.154454	-0.875645	Not Interesting
g12518	sp|Q5PQ71|ISOC2_XENLA	0.0746106	0.0133922	Not Interesting
g12522	sp|P52819|RL22_CAEEL	-0.190656	0.70528	Not Interesting
g12523	sp|Q9QYK7|RNF11_MOUSE	0.708613	0.483254	Not Interesting
g12524	sp|O08795|GLU2B_MOUSE	0.67777	-0.105202	Foot
g12526	sp|P14314|GLU2B_HUMAN	0.0246889	0.149075	Not Interesting
g12529	sp|Q2KHZ9|GCDH_BOVIN	0.106329	0.21962	Not Interesting
g1253	NA	2.13014	-0.147268	Foot
g12532	sp|Q9UBC2|EP15R_HUMAN	-0.215272	0.051183	Not Interesting
g12533	sp|Q9WTP7|KAD3_MOUSE	0.670057	-0.0951632	Not Interesting
g12535	sp|Q8IY84|NIM1_HUMAN	-0.173959	-0.0310252	Not Interesting
g12537	sp|Q6NRD0|A13CA_XENLA	0.0537941	0.684877	Not Interesting
g12538	sp|Q96K19|RN170_HUMAN	-0.109203	0.97196	Not Interesting
g1254	NA	0.0174817	-0.032637	Not Interesting
g12540	NA	1.29552	-1.3445	Not Interesting
g12541	NA	-0.287468	-0.452265	Not Interesting
g12542	NA	2.01335	-0.30692	Foot
g12543	sp|Q4R4T9|RANB3_MACFA	-0.254457	0.0229192	Not Interesting
g12544	sp|P53395|ODB2_MOUSE	0.356291	0.417749	Not Interesting
g12545	sp|Q23571|ODB2_CAEEL	-1.65031	2.05154	Head
g12546	sp|Q5F3Z7|CTSL2_CHICK	0.161271	-0.184626	Not Interesting
g12549	sp|Q96MU7|YTDC1_HUMAN	-0.213062	-0.536581	Not Interesting
g12550	sp|O88696|CLPP_MOUSE	0.738047	-0.0229953	Not Interesting
g12551	NA	-0.274529	-0.153672	Not Interesting
g12555	sp|Q8CD26|S35E1_MOUSE	0.484244	-0.582651	Not Interesting
g12556	sp|Q86SG6|NEK8_HUMAN	0.451597	-0.0234832	Not Interesting
g12560	sp|A1X151|CAZA2_ECHTE	-0.673257	0.531139	Head
g12562	sp|P08770|TRA1_MAIZE	1.31216	0.943728	Not Interesting
g12563	sp|Q9W2N0|CAPZA_DROME	0.00429872	0.568005	Not Interesting
g12564	NA	-0.252471	-0.720809	Not Interesting
g12566	NA	0.761294	0.672765	Not Interesting
g12567	sp|P48430|SOX2_CHICK	0.138846	0.698492	Not Interesting
g12568	NA	1.19236	1.51317	Not Interesting
g12569	sp|Q7ZY85|NEPR1_XENLA	0.772707	0.360077	Not Interesting
g12571	sp|Q17QJ5|TSN5_BOVIN	0.91115	0.919365	Not Interesting
g12572	sp|O35449|PRRT1_MOUSE	-0.609197	0.110003	Not Interesting
g12573	sp|O35449|PRRT1_MOUSE	-1.21554	0.452618	Not Interesting
g12574	sp|Q8TB96|TIP_HUMAN	0.189416	0.223172	Not Interesting
g12578	sp|Q922L6|NELFD_MOUSE	-0.0243248	0.255081	Not Interesting
g12579	sp|A2VDP5|ENPP4_BOVIN	-0.116274	-0.330706	Not Interesting
g12580	sp|Q9CYL5|GAPR1_MOUSE	-2.14138	-0.769501	Not Interesting
g12581	sp|P49588|SYAC_HUMAN	-0.215993	0.317959	Not Interesting
g12582	sp|Q9H4G4|GAPR1_HUMAN	-1.77335	-1.80333	Not Interesting
g12583	sp|Q9H4G4|GAPR1_HUMAN	-1.89423	-1.82905	Not Interesting
g12584	sp|Q6PCJ1|DCTN1_XENLA	-0.345151	-0.272192	Not Interesting
g12585	sp|A2AVA0|SVEP1_MOUSE	0.983481	0.870994	Not Interesting
g1259	sp|Q14246|AGRE1_HUMAN	-0.691767	0.107618	Not Interesting
g12591	sp|Q15329|E2F5_HUMAN	-0.1789	0.352831	Not Interesting
g12592	NA	-0.95419	-1.6947	Not Interesting
g12593	NA	0.520148	0.0866475	Not Interesting
g12594	sp|O42260|GEMI2_XENLA	-0.263929	0.00286494	Not Interesting
g12595	sp|Q5E9U9|NPRL2_BOVIN	-0.0465013	-0.547585	Not Interesting
g12598	sp|Q9XGL4|RL31_CYAPA	0.308158	0.336711	Not Interesting
g12599	sp|Q9DEE9|ARP6_CHICK	0.120354	-0.0691465	Not Interesting
g12601	sp|P27590|UROM_RAT	-0.0119631	-0.227208	Not Interesting
g12602	sp|E7EYQ9|TM216_DANRE	1.13166	0.48145	Not Interesting
g12603	sp|Q17QJ5|TSN5_BOVIN	1.04777	0.582007	Not Interesting
g12604	sp|P46824|KLC_DROME	-0.362214	-1.87921	Not Interesting
g12607	sp|A4IJ15|CFA97_XENTR	0.255042	-1.19187	Not Interesting
g12608	sp|Q16960|DYI3_HELCR	0.186868	0.0317019	Not Interesting
g12614	NA	0.527643	-0.334971	Not Interesting
g12619	NA	0.876548	-1.20782	Not Interesting
g1262	NA	-0.521421	-1.03188	Not Interesting
g12628	sp|Q16960|DYI3_HELCR	0.153384	0.102684	Not Interesting
g1263	sp|Q1HG60|PIF1_RAT	0.726261	-0.0842297	Not Interesting
g12631	sp|Q16960|DYI3_HELCR	0.594775	0.77891	Not Interesting
g12632	sp|P21328|RTJK_DROME	0.546853	0.660308	Not Interesting
g12639	NA	-0.60708	-0.68381	Not Interesting
g1264	sp|A5WFR0|PIF1_PSYWF	-0.105902	0.134476	Not Interesting
g12640	NA	-0.21353	1.32052	Head
g12648	sp|A4IH88|K2013_XENTR	0.288773	0.112254	Not Interesting
g12649	sp|Q0VCR1|RTF2_BOVIN	-0.516785	0.264645	Head
g1265	NA	-0.329921	0.122836	Not Interesting
g12650	NA	0.689061	-0.66453	Not Interesting
g12653	sp|Q8MPM1|GELS2_LUMTE	-0.313525	-0.0162881	Not Interesting
g12656	sp|Q6DI37|UBCP1_DANRE	-0.762822	-0.783887	Not Interesting
g12657	sp|P13051|UNG_HUMAN	0.590262	-0.499132	Foot
g12658	sp|Q7MNR0|UNG_VIBVY	-0.382069	0.668558	Head
g1266	sp|O16025|AOSL_PLEHO	-1.18366	-0.0793286	Head
g12671	sp|Q6TH15|EIF3D_DANRE	-0.408912	0.355181	Head
g12681	sp|P94063|HAL3B_ARATH	-0.47169	0.43266	Not Interesting
g12682	NA	0.933582	0.935391	Not Interesting
g12684	sp|Q9SWE5|HAL3A_ARATH	-1.17261	1.04241	Head
g12685	sp|Q3U481|MFS12_MOUSE	0.340346	0.332542	Not Interesting
g12687	NA	5.7926	5.00533	Not Interesting
g1269	sp|P11680|PROP_MOUSE	-2.32514	-1.6832	Not Interesting
g12692	sp|Q9N4D9|NTM1_CAEEL	0.558752	0.153571	Not Interesting
g12698	sp|Q99PL6|UBXN6_MOUSE	-0.383963	-0.367159	Not Interesting
g12699	sp|Q9W4P5|VA0D1_DROME	0.0910426	0.0347305	Not Interesting
g12700	sp|Q148G7|DCTN6_BOVIN	-0.366889	0.334608	Not Interesting
g12703	sp|Q02290|XYNB_NEOPA	-0.464815	-0.145441	Not Interesting
g12704	sp|E2RYF8|TPX2_PATPE	-0.551663	-0.503294	Not Interesting
g12705	sp|Q91YE3|EGLN1_MOUSE	0.475094	-0.0603958	Not Interesting
g12706	sp|Q539E5|APX1_HYDVD	-1.07929	-1.15793	Not Interesting
g12710	sp|P35283|RAB12_MOUSE	3.22624	3.51268	Not Interesting
g12712	NA	0.236633	0.122688	Not Interesting
g12714	NA	1.24366	0.054625	Not Interesting
g12715	NA	0.625616	-0.757389	Not Interesting
g12722	sp|P70236|MP2K6_MOUSE	-0.0153274	0.353333	Not Interesting
g12724	sp|Q99323|MYSN_DROME	-0.933773	-0.195536	Not Interesting
g12725	sp|P35749|MYH11_HUMAN	-0.454143	-0.291573	Not Interesting
g12726	sp|Q5RFK5|GLYC_PONAB	0.489075	0.179717	Not Interesting
g12727	sp|P35623|GLYC_SHEEP	-0.347262	0.699331	Not Interesting
g12728	sp|Q6PB04|MEIG1_XENLA	0.827892	-0.845072	Not Interesting
g1273	sp|P11680|PROP_MOUSE	-2.32116	-1.57646	Not Interesting
g12731	sp|Q8CIS0|CAR11_MOUSE	0.0690905	0.308695	Not Interesting
g12732	sp|Q8CIS0|CAR11_MOUSE	0.28616	1.15925	Not Interesting
g12734	sp|A0AVF1|IFT56_HUMAN	0.240189	0.241772	Not Interesting
g12738	sp|J3S6Y1|TSEAR_MOUSE	-0.18447	-0.271876	Not Interesting
g12739	sp|Q7ZX59|CRLF3_XENLA	-0.620094	-0.451411	Not Interesting
g12740	sp|Q28HY5|CP072_XENTR	-0.972713	0.737486	Head
g12744	sp|Q8IWF2|FXRD2_HUMAN	0.453258	0.347718	Not Interesting
g12746	sp|P04323|POL3_DROME	1.6425	0.919163	Not Interesting
g12747	sp|Q9BXL7|CAR11_HUMAN	-0.476111	-0.667068	Not Interesting
g12748	sp|Q9DCR2|AP3S1_MOUSE	0.833977	0.982508	Not Interesting
g12749	sp|Q58EX2|SDK2_HUMAN	0.213144	0.673898	Not Interesting
g1275	sp|P27918|PROP_HUMAN	-3.46834	-2.14967	Not Interesting
g12756	NA	0.155584	-0.258357	Not Interesting
g12758	sp|O70257|STX7_RAT	-1.14023	1.1309	Head
g1276	sp|Q96RW7|HMCN1_HUMAN	-3.18516	-2.78228	Not Interesting
g12762	sp|Q8BTY8|SCFD2_MOUSE	0.208167	0.193609	Not Interesting
g12764	sp|Q9P2D7|DYH1_HUMAN	-0.241943	0.20194	Not Interesting
g12768	sp|Q13976|KGP1_HUMAN	-0.664849	0.0444312	Head
g12769	sp|P0C605|KGP1_MOUSE	-0.708181	-0.226869	Not Interesting
g12771	NA	-0.786598	-0.473604	Not Interesting
g12772	NA	-0.714043	-0.0950354	Not Interesting
g12775	sp|P46405|RS12_PIG	0.291795	0.330869	Not Interesting
g12776	sp|Q9Y673|ALG5_HUMAN	0.288531	0.797725	Not Interesting
g12777	sp|Q5HZI1|MTUS1_MOUSE	-0.810239	-1.22791	Not Interesting
g12778	sp|Q9WTV0|PREB_RAT	0.572075	0.220243	Not Interesting
g12779	NA	0.129533	-0.310015	Not Interesting
g12782	sp|Q9NUQ2|PLCE_HUMAN	-0.101803	-0.331774	Not Interesting
g12783	sp|Q9ULC3|RAB23_HUMAN	0.483973	0.213357	Not Interesting
g12785	sp|P9WJI5|NAT_MYCTU	-2.23445	-1.80861	Not Interesting
g12786	sp|Q9Y4A0|JERKL_HUMAN	0.283365	0.851616	Not Interesting
g12787	sp|P26256|ANX12_HYDVU	0.60194	0.335293	Not Interesting
g12788	sp|P26256|ANX12_HYDVU	0.361913	0.487615	Not Interesting
g12789	sp|Q9Z1Z2|STRAP_MOUSE	0.554155	0.140371	Not Interesting
g1279	NA	-2.91352	-2.93415	Not Interesting
g12790	sp|Q9NZN8|CNOT2_HUMAN	-0.305538	-0.149961	Not Interesting
g12791	sp|Q9NZN8|CNOT2_HUMAN	-0.152624	-0.0586772	Not Interesting
g12792	NA	0.418796	-0.355845	Not Interesting
g12795	NA	-0.794886	-1.60332	Not Interesting
g12796	sp|Q9XIJ5|PUB18_ARATH	-1.421	-1.72236	Not Interesting
g12802	NA	1.97418	-1.1263	Not Interesting
g12803	NA	0.858727	-1.17688	Foot
g12804	NA	1.79836	-0.194026	Not Interesting
g12806	sp|A9UMS3|PHB2_XENTR	-0.492969	0.716231	Head
g12807	sp|A3KNS9|ARAID_DANRE	-0.0488304	0.710741	Not Interesting
g12808	sp|Q2YDF6|RT35_BOVIN	-0.0296605	0.284552	Not Interesting
g12809	sp|Q2YDF6|RT35_BOVIN	-0.415495	0.325935	Not Interesting
g12810	sp|O88453|SAFB1_RAT	0.116631	-0.198469	Not Interesting
g12814	sp|Q95SX7|RTBS_DROME	0.760283	0.98087	Not Interesting
g12815	sp|Q7ZV43|TOLIP_DANRE	0.101562	0.771806	Head
g12818	NA	-0.190052	-0.0451879	Not Interesting
g12819	NA	0.559956	-0.142362	Not Interesting
g1282	NA	-0.540947	0.152351	Not Interesting
g12820	NA	0.602865	-0.348763	Foot
g12822	NA	0.456362	-0.259125	Not Interesting
g1283	sp|Q8K211|COPT1_MOUSE	0.619257	-0.0765065	Not Interesting
g12830	sp|Q8IY21|DDX60_HUMAN	-0.471313	-0.762826	Not Interesting
g12839	sp|Q19KI0|RHCG_PIG	0.664987	1.11814	Not Interesting
g1284	NA	0.152973	-0.232613	Not Interesting
g12840	sp|Q4VUZ1|RHCG_ONCMY	-1.47928	-0.0453345	Head
g12844	sp|Q5S006|LRRK2_MOUSE	0.165753	-1.49601	Foot
g12845	sp|P35448|TSP1_XENLA	-0.61006	-0.66177	Not Interesting
g12853	sp|P35317|AT1A_HYDVU	-0.330781	-0.173599	Not Interesting
g12855	NA	-0.627125	0.456875	Not Interesting
g12860	NA	-2.10252	0.460741	Not Interesting
g12862	sp|Q3MII6|TBC25_HUMAN	0.68935	0.588998	Not Interesting
g12863	sp|Q868T3|CCAPR_DROME	-1.38542	-0.513258	Not Interesting
g12866	NA	-0.309249	1.09292	Not Interesting
g12868	sp|Q2KNE5|OPN4A_DANRE	0.489912	-0.245861	Not Interesting
g12869	sp|Q05209|PTN12_HUMAN	-0.527891	-0.441548	Not Interesting
g12870	sp|Q9Y2R2|PTN22_HUMAN	-1.01119	-0.322686	Not Interesting
g12871	sp|P28685|CNTN2_CHICK	0.166954	0.419576	Not Interesting
g12872	sp|O15973|OPSD1_MIZYE	-0.238563	-0.485453	Not Interesting
g12873	sp|P56581|TDG_MOUSE	0.292634	0.599513	Not Interesting
g12875	NA	-1.25736	-1.40345	Not Interesting
g12876	sp|Q9D504|ANKR7_MOUSE	-2.72205	-1.63271	Not Interesting
g12877	NA	-1.91703	-1.7596	Not Interesting
g12878	sp|Q9UPS8|ANR26_HUMAN	-1.96591	-1.46805	Not Interesting
g12880	NA	0.241077	-0.335979	Not Interesting
g12881	sp|Q96SK2|TM209_HUMAN	0.127919	0.412676	Not Interesting
g12882	sp|Q8BIZ6|SNIP1_MOUSE	-0.00322958	-0.404861	Not Interesting
g12883	NA	1.07476	-0.886625	Not Interesting
g12884	sp|P80513|MANF_BOVIN	2.05662	0.818017	Foot
g12885	sp|P08680|HEM0_MOUSE	0.000863817	0.466803	Not Interesting
g12887	sp|O60381|HBP1_HUMAN	0.594092	0.762486	Not Interesting
g12888	sp|Q8ST83|PHO_DROME	0.698832	0.235392	Not Interesting
g1289	sp|Q5UQD2|PNKP_MIMIV	-0.403461	0.293503	Not Interesting
g12890	sp|Q68CP4|HGNAT_HUMAN	0.522086	0.0595742	Not Interesting
g12891	sp|Q4KLJ8|PDCL3_RAT	0.101395	0.212629	Not Interesting
g12892	NA	-1.20083	-1.70219	Not Interesting
g12893	sp|Q63187|ELOA1_RAT	0.709197	0.358728	Not Interesting
g12895	sp|Q5ZID2|PDD2L_CHICK	0.107414	-0.32685	Not Interesting
g12896	sp|O18738|DAG1_BOVIN	0.0233693	-1.20853	Not Interesting
g12898	sp|O94812|BAIP3_HUMAN	-0.857604	-0.0511793	Head
g129	sp|Q19AV6|ZSWM7_HUMAN	0.63158	0.0161465	Not Interesting
g1290	sp|Q96T60|PNKP_HUMAN	0.478802	-0.243308	Not Interesting
g12904	NA	0.248095	-1.37253	Not Interesting
g12906	sp|Q02556|IRF8_HUMAN	0.259742	0.173314	Not Interesting
g12909	sp|P23906|IRF2_MOUSE	0.0293072	-0.225661	Not Interesting
g12910	sp|Q9EPK2|XRP2_MOUSE	0.299945	-0.104908	Not Interesting
g12915	sp|O45818|DKF2_CAEEL	1.45013	0.919436	Not Interesting
g12937	sp|Q96PN8|TSSK3_HUMAN	0.302744	-0.0265025	Not Interesting
g12938	sp|P0C6T1|CTF8_RAT	0.121402	-0.236402	Not Interesting
g12939	sp|Q3UZD5|PRDM6_MOUSE	0.214206	-0.137551	Not Interesting
g12940	sp|Q7Z494|NPHP3_HUMAN	-0.343625	-2.76561	Foot
g12941	NA	2.79958	-0.0808258	Not Interesting
g12942	NA	0.654406	0.0682942	Not Interesting
g12943	sp|Q7Z494|NPHP3_HUMAN	-0.409591	-2.75041	Foot
g12944	sp|Q7Z494|NPHP3_HUMAN	0.204308	-2.74174	Foot
g12946	sp|Q8TD57|DYH3_HUMAN	0.260771	0.224581	Not Interesting
g12947	sp|Q8TD57|DYH3_HUMAN	0.424593	-0.281982	Not Interesting
g12948	sp|Q8BW94|DYH3_MOUSE	1.26116	-0.266329	Not Interesting
g12949	sp|Q8NHV1|GIMA7_HUMAN	-0.31862	-0.46456	Not Interesting
g12951	NA	3.20396	2.09566	Not Interesting
g12952	sp|P79113|NPY2R_BOVIN	-0.879121	-1.65432	Not Interesting
g12955	NA	0.620227	0.436732	Not Interesting
g12961	NA	-0.283486	-1.02507	Not Interesting
g12962	sp|Q9Y535|RPC8_HUMAN	-0.282508	0.253629	Not Interesting
g12963	sp|P56213|ALR_MOUSE	0.139851	-0.135428	Not Interesting
g12967	sp|Q7Z494|NPHP3_HUMAN	-0.598801	-1.46053	Not Interesting
g12970	sp|A8Z5Z5|SECA_SULMW	-2.33328	-3.01983	Not Interesting
g12971	NA	0.00270568	-1.19372	Not Interesting
g12972	NA	-0.321296	-0.6308	Not Interesting
g12973	sp|Q5EAK8|DRAM1_XENTR	-0.357322	-1.82995	Foot
g12974	sp|E1C7T6|TYW5_CHICK	-0.0739157	-0.260146	Not Interesting
g12975	NA	-3.26821	1.97445	Head
g12976	NA	0.577142	-0.325082	Not Interesting
g12977	sp|Q0P5N6|ARL16_HUMAN	0.34856	-0.515498	Not Interesting
g12981	NA	2.64892	1.24617	Foot
g12986	sp|P04323|POL3_DROME	0.346681	0.0414304	Not Interesting
g12988	sp|Q53EU6|GPAT3_HUMAN	0.332672	-0.0821543	Not Interesting
g12990	sp|Q6DG38|GPAT3_DANRE	-0.0588505	-0.0888298	Not Interesting
g12991	sp|O35134|RPA1_MOUSE	-0.315534	-0.328281	Not Interesting
g12992	sp|P69478|CHSTB_RAT	4.02511	4.51626	Not Interesting
g12993	sp|Q8BIQ5|CSTF2_MOUSE	-1.58719	1.35854	Head
g12994	sp|Q8HXM1|CSTF2_BOVIN	0.199947	-0.0402111	Not Interesting
g12995	sp|Q9H0L4|CSTFT_HUMAN	0.430915	-0.268207	Not Interesting
g12996	sp|Q96IP4|FA46A_HUMAN	0.67691	0.118671	Not Interesting
g12998	sp|A7T167|GDAP2_NEMVE	0.491019	-0.016869	Not Interesting
g12999	sp|Q95NR9|CALM_METSE	-0.53095	1.03457	Head
g13	sp|Q5TYQ8|ZC3HE_DANRE	-0.750511	-1.01345	Not Interesting
g130	sp|O07051|LTAA_AERJA	-0.605043	-0.625951	Not Interesting
g1300	sp|Q5ZKY4|ING4_CHICK	0.701707	0.15618	Not Interesting
g13002	sp|P11118|CALM_EUGGR	-1.38866	1.78183	Head
g13007	NA	0.592251	0.734356	Not Interesting
g13008	sp|P24423|YVNF_AZOCH	1.64657	-0.00729597	Not Interesting
g1301	NA	3.21471	2.35053	Not Interesting
g13012	sp|Q7XI40|KCY3_ORYSJ	-0.370934	-0.79388	Not Interesting
g13013	sp|P0CR40|SEC24_CRYNJ	0.26638	-0.0887961	Not Interesting
g13014	NA	-1.23241	-0.580885	Not Interesting
g13015	NA	-0.376898	0.455267	Head
g13016	sp|Q5ZKD9|KLH20_CHICK	-1.0967	-0.615491	Not Interesting
g13017	sp|Q13591|SEM5A_HUMAN	0.0274367	0.0256957	Not Interesting
g13019	sp|P16273|PRPX_HORVU	0.0474662	0.328962	Not Interesting
g1302	NA	0.656558	-0.039097	Not Interesting
g13020	sp|P16273|PRPX_HORVU	0.700038	0.474902	Not Interesting
g13021	NA	0.584966	-0.56287	Not Interesting
g13029	NA	0.527143	-0.315898	Foot
g1303	sp|Q9H8H3|MET7A_HUMAN	-0.202287	-0.0283694	Not Interesting
g13032	sp|Q8LBI9|EDL16_ARATH	-2.03634	-2.52652	Not Interesting
g1304	NA	-0.0159362	-0.0982546	Not Interesting
g13040	sp|P35072|TCB1_CAEBR	-0.194192	-0.0382184	Not Interesting
g13041	sp|Q0IH24|SPEF1_XENLA	-0.992079	-0.307396	Not Interesting
g13042	sp|Q95SX7|RTBS_DROME	0.327456	-0.266007	Not Interesting
g13048	NA	1.19444	-0.875694	Foot
g1305	sp|O13147|EPHB3_DANRE	0.178035	0.258608	Not Interesting
g13054	NA	0.330604	1.34631	Not Interesting
g13058	sp|H6BDU4|SODC_CAMDR	0.985796	0.520528	Not Interesting
g13059	NA	-0.0424598	0.393239	Not Interesting
g1306	NA	0.55559	-0.515462	Foot
g13062	sp|Q15256|PTPRR_HUMAN	0.00867228	0.13652	Not Interesting
g13063	NA	0.33722	-0.247111	Not Interesting
g13064	sp|Q9EP53|TSC1_MOUSE	0.084856	-0.340686	Not Interesting
g13065	sp|Q53H47|SETMR_HUMAN	0.608373	2.28227	Not Interesting
g13066	NA	-0.0685053	-0.34956	Not Interesting
g13068	NA	0.0543357	-2.06632	Not Interesting
g13069	NA	1.00336	0.00578456	Not Interesting
g13072	NA	0.99585	-0.790003	Foot
g13076	NA	-0.728033	1.78706	Not Interesting
g13083	sp|P17491|INHBB_RAT	0.199089	-0.488761	Not Interesting
g13094	NA	0.660308	-0.976711	Not Interesting
g13095	NA	0.213921	-0.21873	Not Interesting
g13097	sp|Q9W062|MFAP1_DROME	0.14591	-0.159611	Not Interesting
g13098	NA	-0.17031	0.00826607	Not Interesting
g1310	sp|Q60629|EPHA5_MOUSE	-0.101918	1.15794	Not Interesting
g13103	sp|P35317|AT1A_HYDVU	1.0306	1.19717	Not Interesting
g13104	sp|P35317|AT1A_HYDVU	1.53209	0.958998	Not Interesting
g13108	sp|Q8CHN6|SGPL1_RAT	0.313	1.06392	Head
g13109	NA	-0.8744	-1.2239	Not Interesting
g13112	sp|Q9Y2U5|M3K2_HUMAN	0.533776	-0.197654	Not Interesting
g1312	sp|Q96RW7|HMCN1_HUMAN	0.425197	0.0746031	Not Interesting
g13121	sp|Q9Y2U5|M3K2_HUMAN	-1.602	0.478176	Head
g13123	sp|Q9CAD5|YODA_ARATH	-0.634106	-0.185726	Not Interesting
g13124	sp|Q54R82|MKKA_DICDI	0.0993613	-0.392255	Not Interesting
g13125	NA	-0.847248	0.150342	Head
g13126	NA	-0.592711	-0.131079	Not Interesting
g13127	sp|P03934|TC1A_CAEEL	0.0376173	-0.794426	Not Interesting
g13130	NA	-0.5897	-0.18349	Not Interesting
g13131	NA	0.910275	-0.228386	Foot
g13134	sp|A7S8T5|CCD42_NEMVE	0.169969	0.221994	Not Interesting
g13135	sp|O00562|PITM1_HUMAN	0.25498	0.00698574	Not Interesting
g13137	sp|Q810B6|ANFY1_MOUSE	-0.140744	0.314253	Not Interesting
g13138	sp|P34743|BTG1_CHICK	1.07183	0.928852	Not Interesting
g13140	sp|A7MBP4|IFT46_DANRE	-0.302258	-0.521436	Not Interesting
g13141	sp|Q8BG19|TMTC4_MOUSE	0.759942	0.672487	Not Interesting
g13142	sp|P31400|VATA_MANSE	-0.0594392	0.744989	Head
g13143	sp|Q5RE52|APC5_PONAB	0.00514264	-1.15073	Not Interesting
g13144	sp|Q9FVW4|RENT3_ARATH	-0.522952	-0.340755	Not Interesting
g13145	sp|P0CJ14|VP302_LYCMC	0.540381	0.314123	Not Interesting
g13146	sp|Q04609|FOLH1_HUMAN	-0.10936	0.318894	Not Interesting
g13147	sp|Q9HBA9|FOH1B_HUMAN	0.495245	0.0584113	Not Interesting
g13148	sp|O54697|NALDL_RAT	0.130532	0.376037	Not Interesting
g13149	sp|Q9Y3Q0|NALD2_HUMAN	-0.362727	0.736437	Not Interesting
g13151	sp|Q9U4H5|AMX_DROME	-1.49551	1.58384	Head
g13153	sp|Q8BJ83|TM2D3_MOUSE	0.400059	-0.241786	Foot
g13154	sp|Q8BIK4|DOCK9_MOUSE	-0.597541	-0.351789	Not Interesting
g13155	sp|Q2TAF4|INT6A_XENLA	-0.582207	-0.606158	Not Interesting
g13156	sp|Q24533|DICH_DROME	-0.0907609	-0.247396	Not Interesting
g13157	sp|Q9Y4W2|LAS1L_HUMAN	0.119488	-0.706692	Not Interesting
g13158	sp|Q68ED2|GRM7_MOUSE	-0.510901	-0.68449	Not Interesting
g1316	NA	0.603198	0.0954723	Not Interesting
g13164	sp|Q9X9Q7|NSAD_SPHXE	0.314481	0.560827	Not Interesting
g13165	NA	-0.104114	-0.649484	Not Interesting
g13166	sp|Q9Z0L8|GGH_MOUSE	-0.0511724	0.0360136	Not Interesting
g1317	NA	-0.00727734	-0.330864	Not Interesting
g13174	NA	0.159214	0.505564	Not Interesting
g13175	NA	-3.13897	0.695161	Head
g13176	sp|Q924X7|STK33_MOUSE	-0.733516	-0.0590411	Not Interesting
g13177	NA	-1.29942	0.514278	Not Interesting
g13179	sp|Q3T1L0|A16A1_RAT	0.182805	0.258374	Not Interesting
g13180	sp|P40047|ALDH5_YEAST	-0.104024	0.486573	Not Interesting
g13181	sp|Q9QY96|CASR_MOUSE	-1.57728	-0.517847	Not Interesting
g13182	sp|Q9UHC3|ASIC3_HUMAN	-0.891286	-1.7761	Not Interesting
g13184	sp|O35474|EDIL3_MOUSE	0.238659	0.118432	Not Interesting
g13185	sp|Q3ZC98|NUP85_BOVIN	0.120807	-0.512122	Not Interesting
g13186	sp|Q8R480|NUP85_MOUSE	0.35156	-0.205467	Not Interesting
g13187	NA	-0.0877831	-0.117901	Not Interesting
g13188	NA	0.230134	0.609846	Not Interesting
g13189	NA	-0.465361	1.39322	Not Interesting
g13190	sp|Q8MIZ3|DCPS_PIG	0.662648	-0.686267	Foot
g13191	NA	0.801443	-0.60041	Not Interesting
g13193	sp|Q99K28|ARFG2_MOUSE	-0.148839	0.310999	Not Interesting
g13194	sp|Q5DTZ6|RN150_MOUSE	0.787911	0.558875	Not Interesting
g13199	sp|P19971|TYPH_HUMAN	-0.238172	0.430141	Not Interesting
g132	sp|Q9UNN5|FAF1_HUMAN	-0.415905	0.636185	Head
g1320	sp|Q8K007|SULF1_MOUSE	0.961987	1.55161	Not Interesting
g13200	NA	0.411383	1.05498	Not Interesting
g13206	NA	-1.10201	1.87203	Head
g13207	sp|Q56UN5|M3K19_HUMAN	0.329936	-0.925742	Not Interesting
g1321	NA	-0.835366	0.795892	Head
g13211	sp|Q56UN5|M3K19_HUMAN	0.0749051	-0.359074	Not Interesting
g13212	sp|Q9Y6L7|TLL2_HUMAN	-1.51128	-1.02661	Not Interesting
g13214	NA	1.43492	0.857311	Not Interesting
g13216	NA	-1.3275	-1.95448	Not Interesting
g13218	sp|Q42942|UMPS_TOBAC	-0.241173	-0.0734797	Not Interesting
g13220	sp|Q9EQS3|MYCBP_MOUSE	-2.42715	0.0451496	Not Interesting
g13222	sp|Q99417|MYCBP_HUMAN	0.132666	0.413675	Not Interesting
g13223	sp|E9PZZ1|PRD13_MOUSE	0.391817	0.608305	Not Interesting
g13224	sp|Q8BGC0|HTSF1_MOUSE	0.177984	0.225636	Not Interesting
g13225	sp|O43172|PRP4_HUMAN	-0.259808	0.275069	Head
g13226	sp|P21328|RTJK_DROME	0.211682	0.243687	Not Interesting
g13227	NA	0.216535	-0.136252	Not Interesting
g13228	sp|P19222|CBPA2_RAT	0.46283	0.13709	Not Interesting
g13229	sp|P09954|CBPA1_PIG	-0.595934	0.322892	Head
g1323	NA	-0.399098	0.46153	Not Interesting
g13230	sp|Q9NQ11|AT132_HUMAN	-0.461493	-1.0057	Not Interesting
g13235	sp|Q9CTG6|AT132_MOUSE	-0.797889	-0.571556	Not Interesting
g13236	sp|P21329|RTJK_DROFU	-0.0413306	0.36775	Not Interesting
g13238	NA	0.447081	-0.255924	Not Interesting
g13241	sp|Q7ZTY4|RBBP7_DANRE	-0.17125	0.278101	Not Interesting
g13242	sp|Q99J39|DCMC_MOUSE	0.290592	0.32571	Not Interesting
g13243	sp|Q96N23|CFA54_HUMAN	0.154702	-0.861272	Not Interesting
g13244	sp|Q96N23|CFA54_HUMAN	-0.866761	-1.08257	Not Interesting
g13247	sp|Q9KWN0|AHV_ACTSK	2.99573	4.85419	Head
g13250	sp|Q9KWN0|AHV_ACTSK	1.88143	4.09978	Head
g13251	NA	0.689953	-0.194294	Not Interesting
g13269	NA	0.168898	0.820473	Not Interesting
g13272	sp|P18729|ZG57_XENLA	-0.091724	-0.274525	Not Interesting
g13275	NA	0.132549	0.32651	Not Interesting
g13278	sp|Q5RDB5|CNIH1_PONAB	-0.852601	1.29829	Head
g13279	sp|Q90718|SRF_CHICK	-0.486739	0.0546527	Not Interesting
g13285	sp|Q5ZIF1|APMAP_CHICK	0.671021	0.505731	Not Interesting
g13288	NA	0.341036	0.639112	Not Interesting
g13293	NA	-0.228818	-0.160553	Not Interesting
g13302	sp|P16425|Y2R2_DROME	0.0682669	-1.10572	Not Interesting
g13305	sp|Q94502|GANAB_DICDI	-0.254339	-0.0305382	Not Interesting
g13307	sp|P41252|SYIC_HUMAN	0.847888	1.23938	Not Interesting
g13308	sp|P41252|SYIC_HUMAN	1.20516	0.884834	Not Interesting
g13309	sp|P41252|SYIC_HUMAN	1.28952	0.540001	Foot
g13310	sp|Q7TT37|ELP1_MOUSE	0.376799	-0.492133	Not Interesting
g13311	sp|Q9DC48|PRP17_MOUSE	-0.705542	0.535051	Head
g13313	sp|O60508|PRP17_HUMAN	-0.343426	-0.0789053	Not Interesting
g13315	sp|A0A0R4IBK5|R213A_DANRE	-1.1916	-1.47873	Not Interesting
g1332	sp|Q9D882|CJ035_MOUSE	-0.0979735	1.10242	Head
g13320	sp|A0A0R4IBK5|R213A_DANRE	-0.941291	-1.95063	Not Interesting
g13323	NA	-1.35442	-1.83415	Not Interesting
g1333	NA	0.809173	0.781016	Not Interesting
g13331	sp|A0A0R4IBK5|R213A_DANRE	-0.822679	-0.395718	Not Interesting
g13334	sp|A0A0R4IBK5|R213A_DANRE	-0.766289	-0.947623	Not Interesting
g13345	sp|C6FG12|NLRC5_ICTPU	0.835836	-0.915971	Foot
g13349	NA	0.479646	-0.0090325	Not Interesting
g1335	sp|F4JTP5|STY46_ARATH	0.505124	0.675745	Not Interesting
g13350	NA	0.399393	-0.164641	Not Interesting
g13361	sp|P0C8L6|PHS_HYPDU	2.01378	-0.268989	Foot
g13362	sp|Q91ZV7|PLDX1_MOUSE	0.456487	-0.0861921	Not Interesting
g13363	NA	-0.131085	0.4046	Not Interesting
g13364	sp|A7SGF0|BORC8_NEMVE	0.563751	-0.322566	Not Interesting
g13365	sp|Q5R6L3|DNLI4_PONAB	-0.1552	-0.675389	Not Interesting
g1337	sp|Q7ZX53|S22FL_XENLA	1.65786	0.530444	Not Interesting
g13370	sp|Q90YB1|DNLI4_CHICK	-0.605287	-0.035793	Not Interesting
g13371	NA	0.615533	0.19094	Not Interesting
g13375	NA	0.746033	0.933141	Not Interesting
g13376	sp|Q9GLY5|ITIH3_RABIT	0.444233	0.97043	Not Interesting
g13377	sp|Q6DGR4|HGH1_DANRE	-0.337583	-0.0819898	Not Interesting
g13378	NA	1.31237	1.14466	Not Interesting
g13379	sp|Q80Z30|PPM1E_RAT	0.265866	0.34366	Not Interesting
g1338	sp|Q9GNN8|CTXA_CARAL	0.217929	0.117524	Not Interesting
g13380	NA	0.594667	-0.475798	Foot
g13381	sp|Q6GVH4|GGNB2_CHICK	-0.374958	-0.290675	Not Interesting
g13384	sp|P18762|ADRB2_MOUSE	0.852749	-0.375609	Not Interesting
g13387	NA	-1.07197	-0.674614	Not Interesting
g13390	sp|Q5NVF6|PPAL_PONAB	0.731269	0.0147606	Foot
g13391	NA	0.552957	0.810198	Not Interesting
g13392	NA	0.961643	0.46407	Not Interesting
g13395	NA	-0.170236	-0.907461	Not Interesting
g13396	sp|Q8WVS4|WDR60_HUMAN	-1.29848	-0.0393405	Not Interesting
g13398	sp|Q2HJH8|CK070_BOVIN	0.16764	-0.866177	Not Interesting
g134	sp|Q9Y5Y0|FLVC1_HUMAN	0.590418	0.481431	Not Interesting
g13400	sp|Q3ZBL4|LZTL1_BOVIN	-0.301563	0.0965622	Not Interesting
g13404	NA	0.0240077	-0.703815	Foot
g13405	sp|Q9LS44|PCR4_ARATH	-0.513621	1.18134	Not Interesting
g13406	sp|Q75N73|S39AE_MOUSE	0.0397812	-0.167257	Not Interesting
g13407	sp|P21328|RTJK_DROME	-0.204924	-0.346329	Not Interesting
g13408	sp|Q96DM1|PGBD4_HUMAN	0.371738	-1.18054	Not Interesting
g13412	sp|O75197|LRP5_HUMAN	-0.749545	-0.479319	Not Interesting
g13414	NA	0.735157	1.00566	Not Interesting
g13416	sp|Q5DU56|NLRC3_MOUSE	1.09996	-0.441286	Foot
g13418	sp|P15357|RS27A_DROME	0.414592	0.263289	Not Interesting
g13419	NA	-0.455148	-1.51381	Not Interesting
g13421	NA	0.465789	0.478438	Not Interesting
g13423	sp|Q9Y4G6|TLN2_HUMAN	-0.458635	0.529917	Head
g13424	sp|A7S4N4|SERIC_NEMVE	0.229046	-0.142218	Not Interesting
g13425	sp|Q147X3|NAA30_HUMAN	0.204263	-0.512621	Not Interesting
g13426	sp|Q03701|CEBPZ_HUMAN	-0.297006	-0.681555	Not Interesting
g13428	sp|Q92797|SYMPK_HUMAN	-0.96353	0.772964	Head
g13429	sp|Q92797|SYMPK_HUMAN	-0.658331	-0.0134195	Not Interesting
g1343	NA	0.0998413	0.0345955	Not Interesting
g13432	sp|Q80X82|SYMPK_MOUSE	-0.640044	-0.331556	Not Interesting
g13433	NA	-0.679373	-1.03944	Not Interesting
g13436	sp|P85120|DAPLE_XENLA	0.132319	-0.00498515	Not Interesting
g13437	NA	1.60108	1.43887	Not Interesting
g13443	sp|Q640L2|SPX3_XENLA	0.339672	-0.678586	Not Interesting
g13448	sp|Q08759|MYB_XENLA	-0.60514	-0.339756	Not Interesting
g13449	NA	-0.242675	-0.658061	Not Interesting
g13450	sp|Q08D51|ATG2A_XENTR	-0.715451	0.229193	Not Interesting
g13453	NA	0.0945385	-0.164953	Not Interesting
g13455	sp|Q6P7D4|CP20A_RAT	0.0223831	0.326281	Not Interesting
g13456	NA	0.0823934	0.127659	Not Interesting
g13459	sp|B5X8A5|ABRAL_SALSA	0.265523	1.26204	Not Interesting
g1346	NA	0.717231	0.443148	Not Interesting
g13460	NA	0.745762	-0.541275	Foot
g13461	NA	0.193068	0.797199	Not Interesting
g13469	NA	0.644355	-0.159802	Foot
g1347	NA	0.196021	-0.506226	Not Interesting
g13470	sp|P54357|MLC2_DROME	0.637646	-0.335639	Foot
g13471	sp|Q8W034|RNP1_ARATH	0.161861	0.347629	Not Interesting
g13472	NA	-0.179423	-0.216773	Not Interesting
g13473	sp|Q9UH92|MLX_HUMAN	-0.274841	1.10152	Not Interesting
g13474	NA	0.302871	0.320349	Not Interesting
g13476	sp|Q05B56|TF2H3_BOVIN	0.411362	0.0246796	Not Interesting
g13477	sp|Q9VBW3|CAD96_DROME	0.365446	0.027525	Not Interesting
g13478	sp|Q8CBH5|MFSD6_MOUSE	-3.15457	-3.87267	Not Interesting
g1348	sp|Q16204|CCDC6_HUMAN	0.184656	0.468164	Not Interesting
g13489	NA	0.399547	0.402666	Not Interesting
g1349	sp|Q9BY15|AGRE3_HUMAN	0.443173	-0.712954	Not Interesting
g13494	sp|P46822|KLC_CAEEL	-1.38635	-0.429741	Not Interesting
g13495	NA	-2.01648	0.0368149	Not Interesting
g135	sp|Q6P0I8|EXOS6_DANRE	0.068469	0.24518	Not Interesting
g13505	sp|P10621|IPNS_STRC2	0.188137	-0.197024	Not Interesting
g13506	sp|Q9NBX4|RTXE_DROME	0.928461	-0.492628	Not Interesting
g13507	sp|Q9DBT3|CCD97_MOUSE	1.62614	-1.02437	Foot
g13508	sp|Q803I8|SYVN1_DANRE	0.402859	0.0453455	Not Interesting
g13509	sp|Q5E951|TBCB_BOVIN	0.842741	-0.0274468	Not Interesting
g1351	NA	2.78512	1.94541	Not Interesting
g13513	sp|P25228|RAB3_DROME	0.26257	-1.65414	Not Interesting
g13514	sp|Q9BX10|GTPB2_HUMAN	1.61151	2.27482	Head
g13515	sp|I0IUP3|MCM8_CHICK	-0.164872	0.301453	Not Interesting
g13516	sp|Q13825|AUHM_HUMAN	0.185248	0.618869	Not Interesting
g13517	sp|Q9CX13|CNIH4_MOUSE	1.1881	-0.637839	Foot
g13518	NA	-0.00671077	0.674407	Not Interesting
g13519	sp|Q7M456|RNOY_CRAGI	0.386224	-0.331188	Not Interesting
g1352	NA	0.226455	0.428461	Not Interesting
g13520	NA	0.525368	1.55524	Not Interesting
g13521	sp|Q5U4U5|TIM22_XENLA	-0.380504	0.822396	Not Interesting
g13522	sp|Q58DQ5|RT09_BOVIN	-0.523545	0.912235	Head
g13523	sp|D3ZSC8|DJC17_RAT	-2.8052	1.55659	Head
g13524	sp|P21328|RTJK_DROME	0.414942	-0.341392	Not Interesting
g13525	sp|Q2KI83|DJC17_BOVIN	-0.942451	0.600132	Head
g13529	NA	1.75253	1.33389	Not Interesting
g13531	sp|Q9N0V4|GSTM1_BOVIN	0.361692	0.164056	Not Interesting
g13532	sp|Q9UPN3|MACF1_HUMAN	-1.11883	-1.63201	Not Interesting
g13533	sp|Q9NXZ2|DDX43_HUMAN	-0.100413	-0.130868	Not Interesting
g13534	sp|Q5W041|ARMC3_HUMAN	-0.219991	0.0787005	Not Interesting
g13535	sp|P40954|CHI3_CANAL	0.275775	0.463762	Not Interesting
g13536	sp|Q9D0V7|RCAS1_MOUSE	-0.464029	0.0396683	Not Interesting
g13539	sp|Q9NBX4|RTXE_DROME	1.03992	1.29473	Not Interesting
g1354	sp|Q8WXI2|CNKR2_HUMAN	-0.331452	-0.317556	Not Interesting
g13540	NA	-0.29	0.112495	Not Interesting
g13542	sp|B8JLQ9|CBPO_DANRE	0.465173	-0.315387	Not Interesting
g13543	NA	-0.379912	0.766155	Not Interesting
g13544	sp|O08992|SDCB1_MOUSE	0.238871	0.355969	Not Interesting
g13546	sp|Q80VL3|PRIC3_MOUSE	-0.43082	0.697026	Not Interesting
g13547	sp|Q174I2|PRIC1_AEDAE	0.213852	0.389152	Not Interesting
g13548	sp|P08251|AT1B1_CHICK	0.165242	-0.033832	Not Interesting
g13549	sp|Q6ZPJ3|UBE2O_MOUSE	0.265328	0.423016	Not Interesting
g1355	NA	-0.769341	2.69151	Not Interesting
g13559	NA	-0.79124	-1.32596	Not Interesting
g13561	NA	0.101706	0.462811	Not Interesting
g13574	sp|D3YXG0|HMCN1_MOUSE	-0.03993	-0.171668	Not Interesting
g13575	sp|Q8DEL8|SECA_VIBVU	-1.48357	-1.25624	Not Interesting
g13578	NA	1.02625	0.569963	Not Interesting
g13585	sp|Q15760|GPR19_HUMAN	-1.54855	-1.32989	Not Interesting
g13587	sp|Q64121|PRLHR_RAT	0.0712855	1.57521	Head
g13588	NA	0.607209	0.0184801	Not Interesting
g13589	sp|Q6ZQK5|ACAP2_MOUSE	-0.681457	0.0502251	Not Interesting
g13590	sp|Q54K09|GRLQ_DICDI	-1.15884	-1.42318	Not Interesting
g13591	sp|Q76IC5|PGPI_RAT	-0.521146	0.552519	Head
g13592	sp|Q04467|IDHP_BOVIN	0.0257429	0.700871	Head
g13595	NA	0.116071	-0.114995	Not Interesting
g13596	NA	-0.0461983	-0.0276552	Not Interesting
g13597	sp|Q8IWZ8|SUGP1_HUMAN	0.138381	0.0924282	Not Interesting
g13598	NA	-1.19577	0.311764	Head
g13599	sp|P51987|CCNB_HYDVD	-0.30151	-0.696562	Not Interesting
g136	NA	0.305104	-0.390902	Not Interesting
g1360	NA	1.14332	1.01553	Not Interesting
g13600	sp|A1L3F4|MEX3B_XENLA	-0.414789	0.640606	Head
g13601	sp|Q8NDA2|HMCN2_HUMAN	-0.244091	0.0319438	Not Interesting
g13602	sp|P13234|KCC4_RAT	0.514025	0.0401532	Not Interesting
g13603	NA	3.1366	4.56687	Not Interesting
g13608	NA	4.11332	6.27143	Not Interesting
g1361	NA	-0.302281	-0.0222353	Not Interesting
g13612	NA	8.05739	7.82352	Not Interesting
g13619	NA	8.1362	6.53158	Not Interesting
g1362	NA	0.147713	0.0426627	Not Interesting
g13620	sp|P61315|G3ST3_MOUSE	1.32386	0.0297023	Foot
g13621	sp|P61315|G3ST3_MOUSE	1.59408	0.0589926	Foot
g13628	NA	1.15482	1.8542	Not Interesting
g1363	sp|Q53H47|SETMR_HUMAN	0.88676	0.466203	Not Interesting
g13634	sp|Q9D9I4|TBC20_MOUSE	-0.580181	-0.510197	Not Interesting
g13635	sp|Q95N27|PP16B_BOVIN	-0.0851115	-0.37544	Not Interesting
g1365	NA	-0.335709	-0.0600456	Not Interesting
g13653	NA	-0.921595	0.500897	Head
g13654	sp|Q5ZLG9|WDR59_CHICK	-1.40128	0.506569	Head
g13655	sp|Q8IVV2|LOXH1_HUMAN	-1.10269	-1.08918	Not Interesting
g13656	sp|P56716|RP1_MOUSE	-0.89764	-0.80285	Not Interesting
g13657	sp|Q18DN4|HMU_HALWD	-0.453763	-1.54296	Not Interesting
g13658	sp|Q8C0M0|WDR59_MOUSE	-0.391117	-0.108444	Not Interesting
g13659	NA	-0.38517	0.122474	Not Interesting
g1366	sp|Q9NPA2|MMP25_HUMAN	0.0430378	-0.0689022	Not Interesting
g13663	sp|Q8IY51|TIGD4_HUMAN	1.49374	-1.20403	Foot
g13664	sp|P29506|UNC4_CAEEL	-0.66162	-1.10975	Not Interesting
g13667	sp|Q587J7|TDR12_HUMAN	-0.564461	-0.606582	Not Interesting
g13668	sp|Q5HZL9|HDHD3_XENLA	0.102788	-1.04889	Not Interesting
g13669	sp|B9W7H9|NOP9_CANDC	-0.0729911	-0.394086	Not Interesting
g13670	NA	-4.4008	2.65142	Head
g13671	sp|Q7T0W1|BOP1A_XENLA	-0.666599	-0.152387	Not Interesting
g13672	sp|A4IHS2|BOP1_XENTR	-0.698726	0.270239	Head
g13674	sp|Q86T03|TM55B_HUMAN	-0.260916	0.0860096	Not Interesting
g13677	NA	1.45174	-0.0612918	Not Interesting
g13678	sp|Q5PQM2|KLC4_RAT	1.64529	-0.413284	Foot
g13680	sp|Q7KIN0|TOLL7_DROME	0.594229	0.295563	Not Interesting
g13681	sp|Q7Z494|NPHP3_HUMAN	1.57469	-0.932509	Foot
g13683	NA	1.45885	0.149174	Not Interesting
g13686	sp|P46824|KLC_DROME	1.72811	-0.603535	Not Interesting
g13690	sp|Q28DG7|UBAC1_XENTR	-0.645854	-0.272619	Not Interesting
g13691	sp|Q5XXP2|OPN4_PHOSU	0.153229	-0.983149	Not Interesting
g13693	NA	-2.09986	-3.6719	Not Interesting
g13694	NA	1.32602	0.101797	Not Interesting
g13697	sp|Q54I82|CDD_DICDI	0.078901	0.189098	Not Interesting
g13698	sp|Q804X9|OPN4A_GADMO	-0.596737	-1.03472	Not Interesting
g137	sp|P57784|RU2A_MOUSE	0.927194	-0.00190982	Not Interesting
g13706	sp|Q6AZT7|NPHP3_XENLA	0.34167	-0.414453	Not Interesting
g13709	sp|Q3V096|ANR42_MOUSE	0.698834	-0.235128	Foot
g13711	NA	-0.154835	-0.263406	Not Interesting
g13712	NA	0.57365	-1.15091	Not Interesting
g13718	NA	-0.705025	-0.0255694	Not Interesting
g13719	NA	0.400107	0.721975	Not Interesting
g1372	sp|Q6P7W5|SEN2_MOUSE	0.00868487	-0.117049	Not Interesting
g13720	NA	-0.819738	-1.74761	Not Interesting
g13722	NA	0.723479	0.127769	Not Interesting
g13723	NA	0.254843	0.0921744	Not Interesting
g13727	sp|Q1RLK6|B3GN4_MOUSE	0.0434328	-0.800285	Not Interesting
g13728	sp|Q9Y2G0|EFR3B_HUMAN	-0.760508	-0.252329	Not Interesting
g13729	sp|P45953|ACADV_RAT	0.311686	0.451061	Not Interesting
g13730	sp|P42325|NCAH_DROME	1.21811	1.35222	Not Interesting
g13732	sp|P50544|ACADV_MOUSE	0.432571	0.804305	Not Interesting
g13733	sp|Q3SWT4|IWS1_RAT	-0.0481493	-0.232775	Not Interesting
g13734	NA	0.304603	-0.481883	Foot
g13735	NA	0.158973	-0.358972	Not Interesting
g1374	sp|P19440|GGT1_HUMAN	-0.085776	0.512258	Not Interesting
g13740	NA	0.0193397	0.215068	Not Interesting
g13741	sp|Q27433|MEC2_CAEEL	-0.388441	-0.604077	Not Interesting
g13744	NA	0.955247	0.777269	Not Interesting
g13747	NA	-1.36763	-1.3089	Not Interesting
g13748	NA	-1.54217	-1.16237	Not Interesting
g13749	sp|Q8WXH0|SYNE2_HUMAN	-0.990024	-1.48396	Not Interesting
g1375	sp|P23378|GCSP_HUMAN	-0.432289	0.400613	Head
g13750	sp|Q86BE9|PEN2_DROME	-1.61894	1.77991	Head
g13751	sp|Q99L90|MCRS1_MOUSE	0.0344481	0.318608	Not Interesting
g13753	sp|C9D7C2|CAC1A_APIME	-0.549629	-0.886215	Not Interesting
g13754	sp|O00555|CAC1A_HUMAN	-0.303319	-0.516392	Not Interesting
g13756	sp|P91645|CAC1A_DROME	-0.454203	-0.347817	Not Interesting
g13757	sp|P91645|CAC1A_DROME	-0.857436	-0.480578	Not Interesting
g13758	sp|Q13936|CAC1C_HUMAN	-0.251504	-0.461882	Not Interesting
g13759	sp|Q9UNL2|SSRG_HUMAN	0.762027	0.642091	Not Interesting
g13763	sp|Q13936|CAC1C_HUMAN	-0.336538	-0.0263582	Not Interesting
g13767	sp|P56698|CAC1B_DIPOM	0.441675	1.45093e-05	Not Interesting
g13773	NA	1.61681	-0.569067	Not Interesting
g13776	sp|Q6P9Q6|FKB15_MOUSE	-0.618164	-0.483559	Not Interesting
g13780	NA	-0.44188	0.281018	Not Interesting
g13788	NA	0.337466	-0.60037	Not Interesting
g1379	sp|P04354|CALB1_CHICK	-0.718774	-0.43015	Not Interesting
g13791	sp|Q7Z442|PK1L2_HUMAN	-1.07091	-0.770921	Not Interesting
g13795	sp|Q90Y57|JAG1A_DANRE	-1.08313	0.472687	Not Interesting
g138	NA	1.47788	-0.938266	Foot
g1380	sp|Q63942|RAB3D_RAT	-0.228689	-0.301966	Not Interesting
g13800	sp|Q6PH57|GBB1_DANRE	-1.4183	-0.0708722	Head
g13801	sp|Q5UQ60|YL662_MIMIV	2.16358	2.47842	Not Interesting
g13803	sp|Q6ING7|FLAD1_XENLA	0.695137	0.521705	Not Interesting
g13809	sp|Q8WX94|NALP7_HUMAN	0.708925	-1.25718	Not Interesting
g13811	sp|Q07864|DPOE1_HUMAN	-0.584838	-0.238455	Not Interesting
g13812	sp|Q07864|DPOE1_HUMAN	-0.748106	-0.00956147	Not Interesting
g13813	sp|Q6PZ02|ATG4B_CHICK	0.428788	0.306164	Not Interesting
g13814	sp|Q63406|MCF2L_RAT	0.365437	0.310214	Not Interesting
g13815	NA	0.16406	0.326908	Not Interesting
g13826	NA	1.06719	0.817117	Not Interesting
g13833	sp|Q80U87|UBP8_MOUSE	0.00835815	-0.336076	Not Interesting
g13835	sp|Q5RBK0|GIN1_PONAB	0.685075	0.381918	Not Interesting
g13842	NA	-0.922925	1.15504	Not Interesting
g13843	NA	1.49094	-0.688366	Not Interesting
g13845	sp|P40818|UBP8_HUMAN	-0.523833	-0.54149	Not Interesting
g13846	sp|Q60598|SRC8_MOUSE	0.0635712	0.389975	Not Interesting
g13847	sp|Q9W5E1|RBX1A_DROME	0.164773	0.957286	Not Interesting
g13850	sp|Q3UGF1|WDR19_MOUSE	-0.707296	-0.150441	Not Interesting
g13852	sp|Q54ET3|Y6373_DICDI	0.153785	0.431909	Not Interesting
g13853	sp|F1R345|DDX11_DANRE	-0.0899777	-0.670527	Not Interesting
g13854	sp|F1R345|DDX11_DANRE	-0.555186	0.478153	Not Interesting
g13855	sp|Q54ET3|Y6373_DICDI	-0.95119	0.893338	Not Interesting
g13856	NA	0.301927	0.720004	Not Interesting
g13857	sp|H2LRU7|PKD2_ORYLA	-0.961286	0.568411	Head
g13858	sp|Q5R1W7|ECHB_PANTR	-0.0550409	0.89545	Head
g13859	NA	0.942577	-0.113895	Not Interesting
g1386	sp|B3Y064|OBRG_TAKRU	1.11311	0.408584	Not Interesting
g13860	NA	-2.51052	2.25131	Head
g13864	sp|A7RWP6|EIF3E_NEMVE	-0.222225	0.21362	Not Interesting
g13865	sp|Q8MV48|GALT7_DROME	0.435236	0.494628	Not Interesting
g13866	sp|Q3SX22|BSDC1_BOVIN	0.452266	-0.0916976	Not Interesting
g13867	sp|Q9BE72|GTR12_MACFA	0.0478422	-0.436197	Not Interesting
g1387	NA	0.506595	0.90664	Not Interesting
g13871	NA	0.191218	0.0989539	Not Interesting
g13872	NA	0.207887	0.0062352	Not Interesting
g13873	NA	0.671378	-0.149457	Foot
g13876	sp|P55067|NCAN_RAT	-0.61585	-0.511259	Not Interesting
g13893	sp|Q80XJ3|TTC28_MOUSE	-1.01324	0.391605	Head
g13894	NA	0.15613	-0.618089	Not Interesting
g13898	sp|Q7PHR1|KIF1A_ANOGA	-1.61676	0.739814	Head
g139	sp|Q9NXG6|P4HTM_HUMAN	0.387862	-0.0100982	Not Interesting
g1390	sp|Q9WU61|CLCC1_RAT	0.538764	0.0976549	Not Interesting
g13900	sp|P79101|CPSF3_BOVIN	-0.155134	-0.453454	Not Interesting
g13902	sp|Q95SX7|RTBS_DROME	0.264642	0.80148	Not Interesting
g13903	sp|Q9UKF6|CPSF3_HUMAN	-0.493662	0.31121	Head
g13904	NA	-1.65067	2.03332	Head
g13905	sp|Q27245|YH24_CAEEL	-0.243323	0.152248	Not Interesting
g13906	sp|Q5ZJ65|FA76A_CHICK	0.13239	-0.123242	Not Interesting
g13907	sp|O88866|HUNK_MOUSE	0.296712	0.293242	Not Interesting
g13909	sp|P59910|DJB13_HUMAN	-0.436645	-0.415525	Not Interesting
g13911	sp|P21328|RTJK_DROME	-0.302306	-0.222925	Not Interesting
g13915	sp|Q5BIP8|DNJB5_BOVIN	-0.550562	-0.207792	Not Interesting
g13918	sp|P31836|NCAM1_BOVIN	0.575978	-0.137015	Not Interesting
g13920	sp|A0JN62|CE120_BOVIN	-0.398612	-0.366238	Not Interesting
g13921	sp|B1H2P5|CE120_XENTR	0.104645	-1.0145	Not Interesting
g13923	sp|Q9DEY9|BLM_XENLA	-0.27189	-0.518647	Not Interesting
g13924	sp|Q32L27|UB2Q2_BOVIN	0.871466	-0.305717	Foot
g13925	NA	0.377163	0.617507	Not Interesting
g13926	sp|Q93571|UBC25_CAEEL	0.934048	-0.323377	Not Interesting
g13928	sp|Q6GM44|MARH5_XENLA	0.326816	0.631522	Not Interesting
g13929	sp|Q5RA22|5NTC_PONAB	0.0403155	0.585661	Not Interesting
g13930	sp|O96028|NSD2_HUMAN	-0.222851	-0.451684	Not Interesting
g13931	sp|Q6PBF7|EMC4_XENTR	0.0341453	0.0734176	Not Interesting
g13932	NA	-0.861042	-1.571	Not Interesting
g13934	sp|P13221|AATC_RAT	-0.0921056	0.12337	Not Interesting
g13935	NA	-0.934417	-1.42642	Not Interesting
g13936	sp|Q9UBD5|ORC3_HUMAN	-0.226413	-0.620619	Not Interesting
g13938	NA	0.0185455	0.373422	Not Interesting
g13939	sp|Q9CPU4|MGST3_MOUSE	-0.536116	1.41311	Head
g1394	NA	-0.610379	-0.176183	Not Interesting
g13943	NA	-0.0844163	0.349101	Not Interesting
g13953	NA	0.377216	0.540377	Not Interesting
g13954	sp|P21328|RTJK_DROME	1.26565	-1.08388	Not Interesting
g13955	NA	-0.499396	0.100281	Not Interesting
g1396	NA	1.13226	0.787156	Not Interesting
g13961	NA	-0.717316	0.00590168	Not Interesting
g13962	sp|Q9JJA9|GRASP_MOUSE	0.018829	-0.933643	Foot
g13965	sp|Q7ZWE3|LARP7_DANRE	-0.56653	-1.67444	Not Interesting
g13967	sp|O43396|TXNL1_HUMAN	0.0351622	0.679344	Not Interesting
g13968	sp|Q5SVZ6|ZMYM1_HUMAN	0.903899	0.423294	Not Interesting
g13969	NA	1.04979	-0.404459	Not Interesting
g13970	sp|Q9N0W2|FUT8_BOVIN	0.326034	-0.00283372	Not Interesting
g13971	sp|Q9ASR4|BCAL2_ARATH	-0.180203	-0.975789	Not Interesting
g13972	sp|P27401|POL_SFV3L	0.427736	-0.457335	Foot
g1398	sp|Q75WS4|CRYD_XENLA	-0.287239	-0.672685	Not Interesting
g13980	sp|Q9TWL9|COMA_CONMA	-0.712191	-0.518244	Not Interesting
g13981	sp|Q9N0W2|FUT8_BOVIN	-0.0996063	0.284167	Not Interesting
g13984	sp|P28668|SYEP_DROME	0.546838	-0.00718688	Not Interesting
g13985	sp|P07814|SYEP_HUMAN	-0.289706	0.0263625	Not Interesting
g13986	sp|Q8CGC7|SYEP_MOUSE	-0.227359	0.305698	Not Interesting
g13987	sp|Q8CGC7|SYEP_MOUSE	-0.238779	-0.121149	Not Interesting
g13988	sp|P04920|B3A2_HUMAN	-0.189008	-0.383748	Not Interesting
g13989	NA	0.972413	0.0447433	Foot
g1399	sp|P50533|SMC2_XENLA	-0.242029	-0.286695	Not Interesting
g13990	sp|O18917|B3A3_RABIT	-0.427287	-0.176141	Not Interesting
g13995	sp|Q4V7T8|ROP1L_XENLA	-0.59379	0.169055	Not Interesting
g13996	sp|Q32KN9|PRLD1_BOVIN	0.641997	0.0858428	Not Interesting
g13998	sp|Q9H5L6|THAP9_HUMAN	0.258926	-0.00316982	Not Interesting
g13999	sp|Q00174|LAMA_DROME	1.40174	0.74456	Not Interesting
g14	sp|P49355|FNTB_BOVIN	0.497462	0.713098	Not Interesting
g1400	sp|Q64487|PTPRD_MOUSE	0.482886	-1.12943	Foot
g14000	sp|Q00174|LAMA_DROME	0.890361	0.770577	Not Interesting
g14001	NA	0.657741	0.498034	Not Interesting
g14003	sp|O35607|BMPR2_MOUSE	-0.151632	-0.482937	Not Interesting
g14005	sp|Q9ESL4|MLTK_MOUSE	-0.358847	0.236158	Not Interesting
g14012	sp|Q9NYL2|MLTK_HUMAN	0.495981	0.47148	Not Interesting
g14015	NA	0.416295	0.781091	Not Interesting
g14018	sp|Q15063|POSTN_HUMAN	-3.16395	-5.78405	Foot
g14019	sp|A0JP70|WDR90_XENTR	-0.973477	0.0152879	Not Interesting
g1402	NA	-0.0243724	-0.409623	Not Interesting
g14020	sp|A0JP70|WDR90_XENTR	-0.845792	0.0422064	Not Interesting
g14021	sp|A0JP70|WDR90_XENTR	-0.345197	-0.00918757	Not Interesting
g14025	sp|P60670|NPL4_MOUSE	-0.0683948	0.290458	Not Interesting
g14028	sp|Q5F3I6|TM104_CHICK	1.02883	0.892151	Not Interesting
g1403	sp|P35832|PTP99_DROME	0.343039	-0.677194	Foot
g14033	sp|Q5F3I6|TM104_CHICK	1.92777	0.220425	Foot
g14034	NA	1.14188	1.52477	Not Interesting
g14036	sp|Q6EV77|FUT8_PANTR	0.0957822	-0.726259	Not Interesting
g14037	sp|Q30T29|GMHA_SULDN	2.34754	2.16668	Not Interesting
g14038	NA	0.633586	-0.254977	Not Interesting
g14039	NA	-0.363829	-0.172056	Not Interesting
g1404	sp|Q64604|PTPRF_RAT	-0.418662	-0.0599688	Not Interesting
g14048	sp|Q9UIK4|DAPK2_HUMAN	1.03002	0.926354	Not Interesting
g14049	sp|O00566|MPP10_HUMAN	-0.22041	-0.418405	Not Interesting
g1405	NA	-0.688982	-1.07931	Not Interesting
g14050	NA	0.453397	0.485712	Not Interesting
g14051	sp|Q86VS3|IQCH_HUMAN	0.484157	-0.412584	Not Interesting
g14052	sp|Q86VS3|IQCH_HUMAN	0.0677758	-0.275207	Not Interesting
g14053	sp|Q86VS3|IQCH_HUMAN	0.117786	-0.161745	Not Interesting
g14054	NA	-0.892274	-0.581687	Not Interesting
g14055	NA	-0.664674	-0.602062	Not Interesting
g14056	NA	0.121392	-0.615106	Not Interesting
g14057	NA	0.470268	-1.06763	Not Interesting
g1406	sp|Q28DB0|TT39B_XENTR	-0.00629979	-0.0807491	Not Interesting
g14062	sp|Q75N90|FBN3_HUMAN	-0.206181	-0.0949518	Not Interesting
g14066	sp|Q91X83|METK1_MOUSE	0.326974	-0.0456525	Not Interesting
g14067	sp|Q3UYK3|TBCD9_MOUSE	-0.060448	0.136166	Not Interesting
g1407	sp|P31422|GRM3_RAT	-0.502563	-1.28301	Not Interesting
g14070	sp|Q14766|LTBP1_HUMAN	-2.94867	-0.326339	Head
g14071	sp|Q8CG19|LTBP1_MOUSE	-2.6985	-2.30262	Not Interesting
g14072	NA	-3.20984	-1.30513	Not Interesting
g14074	sp|O88799|ZAN_MOUSE	-2.73924	-2.28916	Not Interesting
g14077	sp|D3YXG0|HMCN1_MOUSE	-0.405168	-0.0300963	Not Interesting
g1408	sp|Q5VTQ0|TT39B_HUMAN	-0.828334	0.322763	Not Interesting
g1409	sp|Q9JLC6|TEF_MOUSE	0.69224	-1.39505	Foot
g14095	sp|O95630|STABP_HUMAN	0.266354	-0.449425	Not Interesting
g1410	NA	1.50021	-0.745841	Not Interesting
g14100	sp|A7SEP9|RU1C_NEMVE	0.178792	0.351101	Not Interesting
g14102	sp|P46871|KRP95_STRPU	-0.163503	-0.319767	Not Interesting
g14105	sp|D3YXG0|HMCN1_MOUSE	0.104998	0.887268	Not Interesting
g14106	sp|Q96BK5|PINX1_HUMAN	-0.134275	-0.224532	Not Interesting
g14107	sp|A8GCA7|RIMK_SERP5	1.86201	1.34894	Not Interesting
g14108	sp|Q80T32|AGRD1_MOUSE	-0.176809	0.0879742	Not Interesting
g14109	sp|Q80X19|COEA1_MOUSE	-1.29193	-1.00463	Not Interesting
g14111	sp|P07203|GPX1_HUMAN	0.221782	0.241235	Not Interesting
g14112	sp|Q8AWC7|FUT11_CHICK	0.0230799	0.289848	Not Interesting
[truncated: 13,270 more rows]

## Sheet: Fig3-Sup2F
Peak ID	Gene ID	Swissprot Annotation	Foot Reg logFC	Head Reg logFC	Structural Enrichment
10000	g18743	sp|Q5SZK8|FREM2_HUMAN	0.50543	0.813039	Not Interesting
100016	g12880	NA	0.725137	0.808506	Not Interesting
100017	g12881	sp|Q96SK2|TM209_HUMAN	1.23267	0.996513	Not Interesting
10002	g18743	sp|Q5SZK8|FREM2_HUMAN	0.0770814	0.904707	Not Interesting
100026	g12884	sp|P80513|MANF_BOVIN	0.884456	1.20289	Not Interesting
100039	g12888	sp|Q8ST83|PHO_DROME	0.159748	0.559227	Not Interesting
100090	g11502	sp|Q9QYP2|CELR2_RAT	-1.13085	-0.669469	Not Interesting
1001	g22533	sp|Q9BQE3|TBA1C_HUMAN	-0.594946	-0.557322	Not Interesting
100157	g11527	sp|Q149N8|SHPRH_HUMAN	0.328668	0.609948	Not Interesting
100158	g11528	sp|P02466|CO1A2_RAT	0.384612	0.675317	Not Interesting
100165	g11528	sp|P02466|CO1A2_RAT	1.00333	0.188946	Not Interesting
100167	g11530	NA	-0.418494	-0.696525	Not Interesting
100173	g11539	sp|Q5RCY3|EMP1_PONAB	0.477675	0.681739	Not Interesting
100177	g11543	sp|Q24799|MYPH_ECHGR	1.41424	0.465726	Not Interesting
100184	g11544	NA	-0.855509	-1.67478	Not Interesting
100202	g11545	sp|Q60813|ADM1A_MOUSE	-2.06597	-1.26222	Not Interesting
100279	g11569	sp|Q2PZL6|FAT4_MOUSE	-0.480445	-0.632494	Not Interesting
100280	g11569	sp|Q2PZL6|FAT4_MOUSE	-0.724561	-0.966674	Not Interesting
100282	g11569	sp|Q2PZL6|FAT4_MOUSE	-0.900143	-0.839232	Not Interesting
100343	g11575	sp|Q8BJ64|CHDH_MOUSE	-0.913863	-0.941601	Not Interesting
100372	g11588	NA	-0.837957	-0.21244	Not Interesting
100373	g11588	NA	-0.873906	-1.27837	Not Interesting
100401	g11603	sp|Q6UPE0|CHDH_RAT	0.581475	1.29196	Not Interesting
100403	g11604	NA	-1.34713	-0.962052	Not Interesting
100405	g11604	NA	-0.215694	-0.589284	Not Interesting
100429	g11611	sp|C6KFA3|AGRG6_DANRE	-0.508649	-0.83528	Not Interesting
100431	g11611	sp|C6KFA3|AGRG6_DANRE	-0.659588	-1.15239	Not Interesting
100449	g11614	NA	-0.644128	-0.84832	Not Interesting
100480	g15327	sp|Q32LN0|EHF_BOVIN	-0.361529	-0.469369	Not Interesting
100494	g15332	sp|P83852|CBPD_LOPSP	0.551293	0.63721	Not Interesting
100578	g144	sp|Q562C7|PUM3_RAT	-0.427175	-0.687949	Not Interesting
100628	g7227	NA	-0.522853	-0.236169	Not Interesting
100668	g10462	NA	0.290716	0.658085	Not Interesting
100681	g28783	NA	0.762367	1.09503	Not Interesting
100682	g28783	NA	1.00184	1.94759	Not Interesting
100691	g28784	NA	0.520446	0.956429	Not Interesting
100692	g28784	NA	0.278707	0.898928	Not Interesting
100693	g28784	NA	1.57252	2.59022	Not Interesting
100696	g28785	NA	0.470053	1.14768	Not Interesting
100697	g28785	NA	0.974254	2.53962	Not Interesting
100719	g28791	NA	0.505849	1.04263	Not Interesting
100737	g28796	sp|Q3UUQ7|PGAP1_MOUSE	-1.87391	-1.5465	Not Interesting
100774	g28819	sp|P21328|RTJK_DROME	0.384792	1.43348	Not Interesting
100785	g28826	sp|Q8NEV4|MYO3A_HUMAN	1.25311	1.56138	Not Interesting
100794	g28828	sp|Q8WXR4|MYO3B_HUMAN	0.574135	0.63648	Not Interesting
100825	g28832	sp|P26261|SDC3_CHICK	0.965191	1.61195	Not Interesting
100850	g28842	sp|P58374|RL30_BRABE	0.728955	0.287555	Not Interesting
100864	g28844	NA	0.431005	0.532521	Not Interesting
100866	g28844	NA	-1.46766	-1.29415	Not Interesting
100882	g28845	NA	0.435551	0.881919	Not Interesting
100883	g28845	NA	0.620823	1.09277	Not Interesting
100887	g28847	sp|Q68FR8|TBA3_RAT	-0.213424	-0.718303	Not Interesting
100897	g28849	sp|Q2HJ86|TBA1D_BOVIN	-0.240906	-0.571277	Not Interesting
100975	g18528	NA	1.06459	0.0662549	Not Interesting
101052	g21163	NA	0.946268	1.67163	Not Interesting
101086	g21172	NA	-0.684253	-1.31056	Not Interesting
101206	g7849	NA	0.543436	0.662531	Not Interesting
101271	g22025	sp|Q75M08|PDI21_ORYSJ	-0.322446	-0.733198	Not Interesting
101279	g22026	NA	-0.450868	-0.687913	Not Interesting
101283	g22028	NA	-0.81301	-1.37363	Not Interesting
101292	g22029	NA	-0.448115	-0.815709	Not Interesting
101304	NA	NA	-0.97086	-0.697494	Not Interesting
101305	g9301	NA	-0.761284	-1.267	Not Interesting
101306	g9301	NA	0.601863	0.445094	Not Interesting
101325	g25667	NA	-0.611381	-0.37374	Not Interesting
101351	g25677	sp|Q9Z173|AGRL3_RAT	-0.707395	-0.180259	Not Interesting
101354	g25677	sp|Q9Z173|AGRL3_RAT	-0.389091	-0.981564	Not Interesting
101400	g25688	NA	0.532474	0.991186	Not Interesting
101403	g25688	NA	1.65693	1.09485	Not Interesting
101408	g25688	NA	-0.3727	-0.772927	Not Interesting
101428	NA	NA	-0.405389	-0.928306	Not Interesting
10145	g5754	NA	-0.104947	-0.958629	Not Interesting
101451	g14109	sp|Q80X19|COEA1_MOUSE	-0.84766	-1.14299	Not Interesting
101455	g14109	sp|Q80X19|COEA1_MOUSE	-0.548229	-0.988806	Not Interesting
101458	g14110	NA	-1.64822	-0.814087	Not Interesting
101461	g14110	NA	-0.539163	-0.0601854	Not Interesting
101462	g14110	NA	-0.914379	-0.272016	Not Interesting
101503	NA	NA	-1.59468	-0.433897	Not Interesting
101566	g3709	NA	1.03303	0.9232	Not Interesting
101572	g3709	NA	1.83242	2.43869	Not Interesting
101573	g3709	NA	0.89022	1.68589	Not Interesting
101580	g3710	sp|P38977|ANTA_HYDVU	1.07145	1.33991	Not Interesting
101581	g3710	sp|P38977|ANTA_HYDVU	1.9559	2.48177	Not Interesting
101582	g3710	sp|P38977|ANTA_HYDVU	0.567275	0.934509	Not Interesting
101584	g3710	sp|P38977|ANTA_HYDVU	0.744271	1.39942	Not Interesting
101585	g3710	sp|P38977|ANTA_HYDVU	2.46903	2.92439	Not Interesting
101647	g3716	NA	-0.708904	-1.34039	Not Interesting
101653	g3718	NA	-0.243621	-0.814651	Not Interesting
101662	g25223	sp|Q92685|ALG3_HUMAN	1.02129	1.09655	Not Interesting
101701	g25238	sp|Q08D62|MAEL_XENTR	0.647072	1.19168	Not Interesting
101707	g25239	NA	-0.541211	-0.836445	Not Interesting
101726	g27583	sp|P35317|AT1A_HYDVU	1.20418	1.61751	Not Interesting
101739	g27585	sp|Q09930|DIRA_CAEEL	-0.718212	-1.01981	Not Interesting
101740	g27585	sp|Q09930|DIRA_CAEEL	-0.675104	-0.950365	Not Interesting
101775	g27596	NA	0.0212019	-0.661153	Not Interesting
101811	g27611	sp|Q07230|ZSCA2_MOUSE	0.137727	0.76199	Not Interesting
101825	g27622	NA	-0.405636	-0.567971	Not Interesting
101847	g27629	sp|O96952|THIO_GEOCY	-0.5661	-0.911245	Not Interesting
101856	g27630	sp|Q7KQL8|THIO_PLAF7	1.83674	1.61158	Not Interesting
10187	g1450	sp|P18870|JUN_CHICK	0.0577094	1.05381	Not Interesting
101874	g27634	NA	-0.983181	-0.388833	Not Interesting
101891	g27644	sp|O42409|GFI1B_CHICK	-0.36743	-0.74416	Not Interesting
101906	g27649	sp|O04714|GCR1_ARATH	-0.0637782	-0.980046	Not Interesting
101912	g27651	NA	-0.28647	-0.688538	Not Interesting
101921	g27652	NA	-1.18834	-1.54622	Not Interesting
101962	g24137	NA	-0.957869	0.244279	Head
101976	g24138	sp|Q96P65|QRFPR_HUMAN	0.708937	0.335149	Not Interesting
101985	g24140	sp|Q2KIV0|NOL12_BOVIN	-0.700573	-1.33888	Not Interesting
102033	g24152	sp|Q3UMC0|SPAT5_MOUSE	0.617445	0.275376	Not Interesting
102078	g1888	sp|O62667|S28A1_PIG	0.437934	0.777512	Not Interesting
102083	g1889	sp|Q95WA0|RL26_LITLI	0.574717	0.330298	Not Interesting
102149	g1928	sp|Q64512|PTN13_MOUSE	-1.20503	-1.43695	Not Interesting
10222	g11336	NA	-0.532806	-0.815346	Not Interesting
102278	g13544	sp|O08992|SDCB1_MOUSE	-1.44808	-0.825873	Not Interesting
102350	NA	NA	-0.784066	-0.874404	Not Interesting
102376	g22766	sp|Q96DM1|PGBD4_HUMAN	-0.747887	-0.821798	Not Interesting
102377	g22766	sp|Q96DM1|PGBD4_HUMAN	-0.425111	-0.949552	Not Interesting
1024	g22543	sp|P21328|RTJK_DROME	0.72883	0.740923	Not Interesting
102428	g11718	NA	0.49048	0.757473	Not Interesting
102448	g11725	sp|P62997|TRA2B_RAT	-0.617485	-1.26595	Not Interesting
102457	g11728	sp|P49393|RS13_XENLA	0.657779	0.278876	Not Interesting
102465	g11731	sp|Q05722|CO9A1_MOUSE	0.182137	0.731043	Not Interesting
102487	g16561	sp|Q90828|DC1L1_CHICK	0.586473	0.904641	Not Interesting
102513	g16569	sp|Q9NRH2|SNRK_HUMAN	-0.472928	-0.334665	Not Interesting
10253	g4209	NA	0.635536	0.689834	Not Interesting
102530	g16576	NA	-1.21822	-0.986586	Not Interesting
102561	g19102	sp|Q96MB7|HARB1_HUMAN	-0.240871	-1.14322	Not Interesting
102599	g10411	NA	-0.876375	-0.599719	Not Interesting
102620	g10425	NA	2.21442	2.09407	Not Interesting
102655	g810	sp|A0ZSK3|STXA_SYNVE	0.892101	0.572284	Not Interesting
102659	g810	sp|A0ZSK3|STXA_SYNVE	-0.711822	-1.17351	Not Interesting
102678	g1708	sp|C8YR32|LOXH1_MOUSE	-0.140508	-0.694705	Not Interesting
102683	g1709	sp|P34975|OPRK_RAT	-0.513807	-0.820382	Not Interesting
102702	g1715	sp|Q9GZR5|ELOV4_HUMAN	1.21762	0.955396	Not Interesting
102712	g1718	sp|P69478|CHSTB_RAT	1.25457	2.30951	Not Interesting
102713	g1718	sp|P69478|CHSTB_RAT	0.642293	1.01216	Not Interesting
102715	g1718	sp|P69478|CHSTB_RAT	0.717302	2.1424	Not Interesting
102729	g1722	NA	-0.328785	-0.581705	Not Interesting
102735	g1723	NA	-0.40491	-0.791572	Not Interesting
102736	g1723	NA	-0.383934	-0.685905	Not Interesting
102764	g23215	sp|Q96PX9|PKH4B_HUMAN	0.705144	0.840142	Not Interesting
102774	g23215	sp|Q96PX9|PKH4B_HUMAN	-0.213563	-0.900559	Not Interesting
102808	g23223	sp|Q7Z442|PK1L2_HUMAN	-1.03958	-1.43365	Not Interesting
102843	g23228	NA	-0.238175	-0.720787	Not Interesting
102862	g23230	sp|Q96MP5|ZSWM3_HUMAN	0.983859	1.23847	Not Interesting
102927	g26558	sp|Q6P963|GLO2_DANRE	-0.680372	0.0774013	Not Interesting
102966	g22424	NA	-6.19267e-05	0.909938	Not Interesting
102980	g22424	NA	-0.876853	-0.541599	Not Interesting
102982	g22424	NA	-0.0974885	-0.66729	Not Interesting
102996	g22426	sp|Q5R5W0|LASP1_PONAB	-0.739911	-1.0741	Not Interesting
103	g18880	sp|Q5RFB6|RPN1_PONAB	0.555788	0.632009	Not Interesting
1030	g22544	NA	-0.871224	-0.672404	Not Interesting
103032	g22437	sp|Q6GL44|OTUD5_XENTR	0.599223	0.909846	Not Interesting
103055	g22443	NA	-1.2842	-1.46174	Not Interesting
103074	g22449	sp|Q80Y56|RBNS5_MOUSE	-0.420221	-0.588376	Not Interesting
103101	g22451	NA	-0.610995	-0.668866	Not Interesting
103106	g22451	NA	0.581069	0.339157	Not Interesting
103109	g22451	NA	-0.173171	-0.507384	Not Interesting
103112	g22452	sp|Q90WJ8|AJL2_ANGJA	-0.541501	-0.555179	Not Interesting
103170	g29204	NA	-0.780103	-0.161787	Not Interesting
103182	g29211	sp|P50904|RASA1_RAT	0.458251	0.751908	Not Interesting
103207	g21346	sp|Q63041|A1M_RAT	0.849349	1.09852	Not Interesting
103210	g21346	sp|Q63041|A1M_RAT	0.334774	0.611556	Not Interesting
103211	g21346	sp|Q63041|A1M_RAT	0.877806	0.782496	Not Interesting
103214	g21347	sp|Q61838|PZP_MOUSE	0.105472	1.10627	Not Interesting
103220	g21347	sp|Q61838|PZP_MOUSE	-0.217655	-0.430588	Not Interesting
103229	g21353	NA	0.849391	1.35624	Not Interesting
103235	g21354	sp|Q5R4N8|A2MG_PONAB	0.209294	1.056	Not Interesting
103238	g21354	sp|Q5R4N8|A2MG_PONAB	0.286272	0.550781	Not Interesting
103239	g21354	sp|Q5R4N8|A2MG_PONAB	0.567661	0.921242	Not Interesting
103255	g21355	NA	-0.763775	-0.988217	Not Interesting
103280	g4977	sp|C6KFA3|AGRG6_DANRE	0.394545	0.644189	Not Interesting
103306	g13832	NA	0.245265	1.08344	Not Interesting
103334	g24582	NA	0.169682	0.739542	Not Interesting
103346	g24583	sp|P22413|ENPP1_HUMAN	-0.558391	-0.170423	Not Interesting
103357	g24583	sp|P22413|ENPP1_HUMAN	-0.852088	-0.32812	Not Interesting
103381	g24589	sp|O15975|GNAQ_MIZYE	0.733044	1.3876	Not Interesting
103382	g24589	sp|O15975|GNAQ_MIZYE	1.62768	1.65285	Not Interesting
103383	g24589	sp|O15975|GNAQ_MIZYE	-0.693348	-0.835707	Not Interesting
103386	g24591	NA	0.340165	0.495432	Not Interesting
103402	g24593	NA	-0.528805	-0.113325	Not Interesting
103404	g24594	NA	-0.698898	-1.29346	Not Interesting
103601	g23341	sp|P23514|COPB_RAT	0.189901	0.402917	Not Interesting
103618	g23345	NA	-0.464073	-0.746678	Not Interesting
103727	g20995	sp|P46088|GST_NOTSL	-1.13308	-1.39913	Not Interesting
103730	g20996	NA	-0.8736	-0.609802	Not Interesting
103731	g20996	NA	-0.460784	-0.949909	Not Interesting
103744	g21004	sp|Q8VDL4|ADPGK_MOUSE	-0.732916	-0.173939	Not Interesting
103751	g21005	sp|Q9NBX4|RTXE_DROME	-1.071	-0.698354	Not Interesting
10376	g4256	NA	0.959774	0.475152	Not Interesting
10377	g4256	NA	0.732003	0.591641	Not Interesting
103770	g21008	sp|Q96L93|KI16B_HUMAN	-0.911495	-0.734573	Not Interesting
10378	g4256	NA	0.909912	1.03551	Not Interesting
103792	g21012	NA	-0.682256	-0.0253013	Not Interesting
103793	g21012	NA	-1.39783	-0.265342	Not Interesting
103794	g21012	NA	-2.56856	-0.538593	Head
103873	g21036	sp|A1L3T7|FA65C_MOUSE	-0.727678	-0.978378	Not Interesting
1039	g22545	NA	-0.659234	-1.008	Not Interesting
103928	g18244	sp|Q9Z2Y1|TIM_RAT	0.184884	0.584486	Not Interesting
103929	g18244	sp|Q9Z2Y1|TIM_RAT	0.0879548	0.453801	Not Interesting
103938	g18245	sp|P53772|DLLH_BRAFL	0.283946	0.843856	Not Interesting
103949	g18251	sp|Q8SVT3|HD5_ENCCU	-0.597965	-0.623905	Not Interesting
104030	g19883	NA	0.458231	0.829803	Not Interesting
104050	g19889	NA	-0.219755	-0.605174	Not Interesting
104056	g19890	NA	0.956954	1.64759	Not Interesting
104057	g19890	NA	0.873204	1.82072	Not Interesting
104064	g19891	NA	0.673882	1.02353	Not Interesting
104121	g19917	NA	-0.314618	-0.550606	Not Interesting
104125	g19918	sp|P62912|RL32_RAT	0.317601	0.802412	Not Interesting
104149	g19927	sp|P06727|APOA4_HUMAN	1.35842	2.97611	Not Interesting
104208	g26184	NA	-0.974875	-1.46363	Not Interesting
104252	g11762	NA	0.982475	0.843724	Not Interesting
104268	g11766	sp|O43916|CHST1_HUMAN	-0.208438	-0.528627	Not Interesting
104322	g32458	sp|Q63472|KCNH1_RAT	-0.533295	-0.984941	Not Interesting
104323	g32458	sp|Q63472|KCNH1_RAT	-0.810949	-0.753187	Not Interesting
104381	g24092	NA	-0.431296	-0.70011	Not Interesting
104396	g24094	sp|P24257|WNT1_DANRE	-0.379894	-1.06191	Not Interesting
10440	g4273	NA	0.415734	0.748045	Not Interesting
104455	g24108	sp|Q8NET6|CHSTD_HUMAN	1.40152	0.83854	Not Interesting
104461	g24109	NA	-0.798265	-0.912753	Not Interesting
104480	g24114	sp|Q28FN6|OTX2_XENTR	-1.32982	-1.34368	Not Interesting
104482	g24114	sp|Q28FN6|OTX2_XENTR	-0.890821	0.00664045	Not Interesting
104484	g24114	sp|Q28FN6|OTX2_XENTR	0.422648	0.631714	Not Interesting
1045	NA	NA	-1.06738	-0.580393	Not Interesting
104521	g24118	sp|P62925|IF5A_SPOFR	0.784653	0.408336	Not Interesting
104545	g24125	sp|Q4R381|EZH2_MACFA	0.23241	1.13534	Not Interesting
104546	g24125	sp|Q4R381|EZH2_MACFA	0.333939	0.993951	Not Interesting
104548	g24125	sp|Q4R381|EZH2_MACFA	0.306146	0.448727	Not Interesting
104573	g24133	NA	-0.28359	-1.03631	Not Interesting
104576	g24133	NA	-1.31977	-0.5113	Not Interesting
104596	g11632	sp|Q9R160|ADA24_MOUSE	-0.483558	-0.903529	Not Interesting
104612	g11633	sp|Q96RW7|HMCN1_HUMAN	-0.942055	-0.18406	Not Interesting
104617	g11637	NA	-1.12163	-1.85856	Not Interesting
104618	g11637	NA	-1.16208	-0.307219	Not Interesting
104651	g5257	NA	0.639688	1.33643	Not Interesting
104690	g2525	NA	-0.379135	-0.687901	Not Interesting
104704	g13031	NA	-0.984855	-0.839912	Not Interesting
104735	g6438	NA	0.489156	0.508818	Not Interesting
104776	g6448	NA	-0.346761	-0.833653	Not Interesting
104812	g6457	sp|P11274|BCR_HUMAN	0.437304	0.758064	Not Interesting
104834	g6470	NA	-0.406817	-1.3072	Not Interesting
104842	g6470	NA	-0.75573	-1.59063	Not Interesting
104863	g17327	NA	0.302719	0.746754	Not Interesting
104866	g17328	sp|Q5FVG6|PRR5_RAT	-0.89776	-1.21525	Not Interesting
104870	g17329	NA	0.466616	0.932412	Not Interesting
104877	g17330	NA	0.634819	0.933116	Not Interesting
104893	g17344	NA	0.401966	0.552067	Not Interesting
104894	g17344	NA	0.323726	0.833631	Not Interesting
104896	g17344	NA	-0.525991	-0.677243	Not Interesting
104897	g17344	NA	0.206033	0.915363	Not Interesting
104919	g17348	sp|A0A0K3AWM6|MOM5_CAEEL	-0.922539	-0.255285	Not Interesting
104920	g17348	sp|A0A0K3AWM6|MOM5_CAEEL	-1.04448	-0.310084	Not Interesting
104921	g17348	sp|A0A0K3AWM6|MOM5_CAEEL	-0.868845	-0.0365192	Not Interesting
104923	g17349	sp|P62293|ASPM_PANTR	-1.42047	-0.680325	Not Interesting
104933	g17356	sp|P62288|ASPM_FELCA	0.492171	0.545123	Not Interesting
104937	g17356	sp|P62288|ASPM_FELCA	0.389982	0.412887	Not Interesting
105080	g31146	sp|Q9C0H5|RHG39_HUMAN	1.13925	0.716506	Not Interesting
105128	g25353	sp|O14974|MYPT1_HUMAN	-0.825643	-0.364327	Not Interesting
105130	g25354	sp|Q86WC6|PPR27_HUMAN	-0.618334	-0.947596	Not Interesting
105136	g25356	sp|P35555|FBN1_HUMAN	-1.61477	-2.32919	Not Interesting
105138	g25356	sp|P35555|FBN1_HUMAN	-0.384549	-0.787657	Not Interesting
105152	g25359	sp|P52272|HNRPM_HUMAN	-0.758668	-0.537025	Not Interesting
105155	g25361	NA	-0.377881	1.52018	Head
105157	g25361	NA	-0.838223	-1.42197	Not Interesting
105159	g25361	NA	0.00872249	1.21269	Not Interesting
105183	g25362	sp|O88281|MEGF6_RAT	1.26819	2.17471	Not Interesting
105189	g25362	sp|O88281|MEGF6_RAT	2.57678	4.15941	Not Interesting
105190	g25362	sp|O88281|MEGF6_RAT	1.06826	1.24973	Not Interesting
105191	g25362	sp|O88281|MEGF6_RAT	1.19393	1.64635	Not Interesting
105192	g25362	sp|O88281|MEGF6_RAT	1.67787	2.52581	Not Interesting
105194	g25362	sp|O88281|MEGF6_RAT	1.69088	2.32589	Not Interesting
105202	g25363	NA	-0.90587	-1.16338	Not Interesting
105222	g25366	NA	0.46825	0.393314	Not Interesting
105249	g28927	NA	-1.02822	-0.702938	Not Interesting
105282	g28935	sp|Q95SX7|RTBS_DROME	0.631639	0.557786	Not Interesting
105293	g28938	sp|O18866|KCMA1_PIG	-0.882232	-0.984612	Not Interesting
105352	g28960	sp|Q09225|NRF6_CAEEL	-0.259254	-1.03149	Not Interesting
105354	g28961	sp|Q8K0Q5|RHG18_MOUSE	-0.315406	-0.736462	Not Interesting
105363	g28961	sp|Q8K0Q5|RHG18_MOUSE	-0.905467	0.120294	Not Interesting
105384	g28965	sp|Q8IYH5|ZZZ3_HUMAN	0.648526	0.488353	Not Interesting
105429	g28981	sp|Q9CUX1|P52K_MOUSE	-0.765751	-0.900872	Not Interesting
105432	g28980	sp|Q6MG82|PRRT1_RAT	0.378764	0.607865	Not Interesting
105453	g28986	NA	-0.400266	-0.648391	Not Interesting
105466	g28988	NA	-0.370892	-0.802946	Not Interesting
105510	g14992	NA	-0.157717	-0.657041	Not Interesting
105574	g11301	sp|Q7T1N4|ASIC1_OPSTA	-1.08916	-0.603066	Not Interesting
105619	g11313	NA	-0.283409	-0.601069	Not Interesting
105680	g32464	sp|Q6DIE2|NCBP1_XENTR	0.678063	1.19687	Not Interesting
105729	g32476	sp|Q0P4Q4|FRMD3_XENTR	0.901633	0.876537	Not Interesting
10576	g23940	sp|P09095|TYCA_BREPA	-0.601584	0.0039868	Not Interesting
105792	g32489	sp|P53452|DRD1L_TAKRU	-0.261355	-0.602381	Not Interesting
105793	g32490	NA	-0.128029	-0.421994	Not Interesting
105798	g32490	NA	-0.536743	-0.708614	Not Interesting
105815	g32493	NA	-0.864578	-0.63613	Not Interesting
105975	g12776	sp|Q9Y673|ALG5_HUMAN	0.53114	0.500122	Not Interesting
105983	g12777	sp|Q5HZI1|MTUS1_MOUSE	-0.0678264	-0.685684	Not Interesting
105991	g12779	NA	0.00798946	0.666581	Not Interesting
106008	g12785	sp|P9WJI5|NAT_MYCTU	-0.131597	0.957719	Not Interesting
106010	g12786	sp|Q9Y4A0|JERKL_HUMAN	0.481054	0.260716	Not Interesting
106011	g12786	sp|Q9Y4A0|JERKL_HUMAN	-1.11742	-0.499925	Not Interesting
106019	g12789	sp|Q9Z1Z2|STRAP_MOUSE	0.555075	0.42145	Not Interesting
106028	g12790	sp|Q9NZN8|CNOT2_HUMAN	-1.2567	-0.60514	Not Interesting
106082	g6284	NA	-0.454196	-0.864572	Not Interesting
106134	g6319	sp|P35317|AT1A_HYDVU	0.828803	0.762935	Not Interesting
106166	g6326	sp|Q91880|SUH_XENLA	0.49103	0.937647	Not Interesting
106175	g6327	NA	-0.454781	-0.772092	Not Interesting
106194	g6340	sp|P60484|PTEN_HUMAN	1.25338	1.39774	Not Interesting
106209	g6345	NA	-0.667327	-0.90415	Not Interesting
106214	g6352	NA	-0.227146	-0.7968	Not Interesting
106260	g4712	NA	0.53325	0.643062	Not Interesting
106315	g4723	NA	0.822357	0.584473	Not Interesting
106323	g4725	sp|P34257|TC3A_CAEEL	0.577875	0.62556	Not Interesting
106380	g15087	sp|P14755|CRYL1_RABIT	-0.363262	-0.705286	Not Interesting
106412	NA	NA	-1.1081	-0.495449	Not Interesting
106427	g27861	NA	-0.367655	-0.539103	Not Interesting
106439	g27862	sp|Q9EQD2|NPFF2_RAT	0.882361	0.880581	Not Interesting
106440	g27862	sp|Q9EQD2|NPFF2_RAT	1.17785	1.14742	Not Interesting
106446	g27862	sp|Q9EQD2|NPFF2_RAT	-0.705418	-1.37352	Not Interesting
106450	g27863	sp|O62809|OX2R_PIG	0.528627	0.814539	Not Interesting
106464	g27869	sp|A5JYQ9|VMA21_CAEEL	-0.538488	-1.03401	Not Interesting
106474	g27871	NA	0.751534	0.914027	Not Interesting
106509	g27891	sp|Q9QZH0|FZD4_RAT	0.665378	0.661795	Not Interesting
106526	g27896	sp|P12027|PSGP_ONCMY	-1.08658	-0.879174	Not Interesting
106527	g27896	sp|P12027|PSGP_ONCMY	-0.894492	-0.441205	Not Interesting
106568	g27577	sp|Q99569|PKP4_HUMAN	0.720843	0.500935	Not Interesting
106570	g27577	sp|Q99569|PKP4_HUMAN	0.564329	0.820174	Not Interesting
106665	g3995	NA	-0.253986	-0.650251	Not Interesting
106671	g3996	sp|Q6TGZ4|THA11_DANRE	-0.423901	-1.01485	Not Interesting
106700	g3999	sp|Q80VY9|DHX33_MOUSE	0.422717	0.178787	Not Interesting
106713	g4001	sp|O61462|RL37A_CRYST	-0.171366	1.32713	Not Interesting
106715	g4001	sp|O61462|RL37A_CRYST	-0.148782	0.807764	Not Interesting
10673	g8681	sp|Q6P1L5|F117B_HUMAN	-0.215922	-0.650974	Not Interesting
10679	g8682	NA	-0.775718	-0.614798	Not Interesting
10681	g8682	NA	-0.387501	-0.568215	Not Interesting
10687	g8683	sp|Q5TYQ1|ZYG11_DANRE	-0.262312	-0.50399	Not Interesting
106934	g28766	NA	-0.269768	-0.776226	Not Interesting
106947	g33324	NA	2.69335	3.09673	Not Interesting
106949	g33324	NA	1.03642	0.972829	Not Interesting
106951	g33324	NA	2.22408	2.81118	Not Interesting
106953	g33325	NA	1.70372	2.78187	Not Interesting
106966	g33328	NA	0.65028	0.380068	Not Interesting
106990	g33343	NA	-0.77837	-0.407571	Not Interesting
106992	g33343	NA	-0.908428	-0.0516168	Not Interesting
106994	g33344	sp|Q39433|RB1BV_BETVU	-0.122956	1.70764	Not Interesting
107057	g33358	NA	-0.236754	-0.62517	Not Interesting
107058	g33359	NA	-0.667714	-0.816652	Not Interesting
107060	g33359	NA	-0.9276	-1.24846	Not Interesting
107079	g33363	NA	-1.00338	-0.78553	Not Interesting
10711	g26469	sp|Q4FZ58|RTN2_XENTR	-0.341078	-0.475276	Not Interesting
107115	g31835	sp|P53794|SC5A3_HUMAN	0.890345	0.789412	Not Interesting
107245	g25644	sp|Q9NBX4|RTXE_DROME	0.556721	0.176629	Not Interesting
107267	g25647	sp|Q62441|TLE4_MOUSE	-0.653356	-0.206735	Not Interesting
107288	g25652	sp|Q54728|Y1686_STRPN	-0.406244	-0.648194	Not Interesting
107309	g25657	sp|Q26473|SEM1A_SCHAM	0.214771	0.509673	Not Interesting
107325	g280	NA	-0.648567	-1.15522	Not Interesting
107326	g280	NA	-0.475553	-0.912837	Not Interesting
107370	g295	NA	-0.851481	-0.667397	Not Interesting
107384	g298	NA	0.521541	0.910476	Not Interesting
107437	g835	sp|Q2TBE0|C19L2_HUMAN	0.674984	0.628779	Not Interesting
107443	g835	sp|Q2TBE0|C19L2_HUMAN	-0.517297	0.280608	Head
107468	g845	NA	0.361401	0.590455	Not Interesting
107478	g850	NA	0.584377	0.997537	Not Interesting
107483	g851	sp|Q7K4Q5|Y0417_DROME	0.456652	0.301419	Not Interesting
107492	g856	sp|Q503V9|ENDUB_DANRE	0.519212	0.722045	Not Interesting
107493	g856	sp|Q503V9|ENDUB_DANRE	-0.182053	0.990208	Not Interesting
10753	g6701	sp|Q9Y2L5|TPPC8_HUMAN	-0.997712	-0.206508	Not Interesting
107555	g869	sp|Q498J9|MBLC1_XENLA	0.216156	0.586911	Not Interesting
107589	g874	NA	1.63336	1.45964	Not Interesting
107591	g874	NA	0.866341	1.06208	Not Interesting
107592	g874	NA	0.962522	1.38667	Not Interesting
107597	g875	NA	0.478412	0.791338	Not Interesting
107617	g879	NA	0.705987	0.988808	Not Interesting
107618	g879	NA	-2.24399	-1.18003	Not Interesting
107625	g884	NA	-0.611036	-1.01477	Not Interesting
107654	g891	sp|Q96B26|EXOS8_HUMAN	-0.349694	-0.735536	Not Interesting
107660	g891	sp|Q96B26|EXOS8_HUMAN	-0.629052	-0.792393	Not Interesting
10773	g6704	sp|Q8BGA9|OXA1L_MOUSE	-1.06568	-0.0808902	Not Interesting
107738	g911	sp|Q14515|SPRL1_HUMAN	0.570268	0.729326	Not Interesting
107781	g929	sp|Q6ZVD7|STOX1_HUMAN	-1.23466	-1.42062	Not Interesting
107833	g947	sp|P61150|FGF12_RAT	-0.0986899	-0.729383	Not Interesting
107834	g947	sp|P61150|FGF12_RAT	-0.648303	-1.30108	Not Interesting
107841	g947	sp|P61150|FGF12_RAT	1.39712	1.36053	Not Interesting
107858	g949	sp|Q4GZT3|PKD2_BOVIN	-0.714202	-1.0706	Not Interesting
107868	g953	sp|A2A259|PK2L1_MOUSE	-0.420231	-0.656526	Not Interesting
107881	g955	sp|H2LRU7|PKD2_ORYLA	-0.376353	-0.9725	Not Interesting
107905	g31207	NA	0.443711	0.756528	Not Interesting
107925	g31213	sp|P31596|EAA2_RAT	0.402998	0.88826	Not Interesting
107935	g31218	NA	0.343576	0.90923	Not Interesting
107937	g31219	NA	-0.479548	-1.04688	Not Interesting
108026	g31231	sp|Q801X6|PHAR1_CHICK	-0.699945	-1.10957	Not Interesting
108041	g31234	sp|P23468|PTPRD_HUMAN	-0.677834	-0.878046	Not Interesting
108058	g31242	sp|P29241|NADA_APLCA	-0.0594611	0.683958	Not Interesting
108072	g31248	sp|Q27312|NADA_APLKU	-1.19201	-0.3132	Not Interesting
108078	g31249	sp|Q27312|NADA_APLKU	-0.0753129	-0.546888	Not Interesting
10811	g2809	NA	0.686637	0.900622	Not Interesting
10815	g2809	NA	0.801904	1.62301	Not Interesting
108159	g15915	NA	0.671391	0.990159	Not Interesting
108223	g5707	NA	0.0715426	0.669421	Not Interesting
108245	g5714	NA	-0.41262	-0.761121	Not Interesting
108289	g5729	sp|P21328|RTJK_DROME	0.534423	0.670096	Not Interesting
108316	g5732	sp|P27708|PYR1_HUMAN	-0.349172	-0.413577	Not Interesting
108318	g5732	sp|P27708|PYR1_HUMAN	-0.49894	0.00595922	Not Interesting
108325	g5734	sp|Q91437|PYR1_SQUAC	-0.00968966	-0.498451	Not Interesting
108330	g5735	sp|O54834|RHG06_MOUSE	0.241138	0.481937	Not Interesting
108345	g5735	sp|O54834|RHG06_MOUSE	-0.115611	-0.848217	Not Interesting
108346	g5735	sp|O54834|RHG06_MOUSE	-0.186289	-0.677857	Not Interesting
108368	g5747	NA	0.933225	1.23142	Not Interesting
10837	g2816	NA	-0.44044	-0.979632	Not Interesting
108408	g18409	sp|Q9WVM7|AIMP2_CRIGR	0.538499	0.412833	Not Interesting
10843	g2817	NA	0.637057	0.116199	Not Interesting
108445	g18415	sp|Q9UPQ7|PZRN3_HUMAN	-1.22359	-1.16446	Not Interesting
108447	g18416	NA	-1.41168	-1.30135	Not Interesting
108448	g18416	NA	-1.35522	-0.588429	Not Interesting
108473	g18422	NA	-0.504557	-0.924947	Not Interesting
10853	g2819	NA	-0.352903	-0.99307	Not Interesting
108549	g18436	sp|Q6AXS4|RENR_RAT	0.948817	0.98757	Not Interesting
108550	g18436	sp|Q6AXS4|RENR_RAT	0.48881	0.565559	Not Interesting
108579	g18444	sp|P07314|GGT1_RAT	0.51641	0.505461	Not Interesting
10858	g2830	sp|P10090|WHITE_DROME	-0.163144	1.29959	Not Interesting
10859	g2830	sp|P10090|WHITE_DROME	-0.940466	0.562387	Head
108590	g18445	sp|Q64362|AKTIP_MOUSE	-0.405145	-0.694448	Not Interesting
108593	g18448	NA	0.270038	0.586473	Not Interesting
108598	g18449	sp|Q86SQ0|PHLB2_HUMAN	-0.541167	-1.0266	Not Interesting
10860	g2830	sp|P10090|WHITE_DROME	0.119438	0.946042	Not Interesting
108600	g18449	sp|Q86SQ0|PHLB2_HUMAN	-0.366971	-0.715667	Not Interesting
108601	g18449	sp|Q86SQ0|PHLB2_HUMAN	-0.299676	-0.497049	Not Interesting
10861	g2831	NA	0.229448	0.903434	Not Interesting
108623	g18466	sp|P07524|TYRO_STRAT	0.843886	3.22992	Not Interesting
10863	g2831	NA	-0.622359	1.11206	Head
108644	g18475	sp|Q5TJ56|FORF_DICDI	-0.0353039	-0.596954	Not Interesting
108649	g18478	sp|Q9CXV1|DHSD_MOUSE	-0.89221	-1.41064	Not Interesting
108650	g18478	sp|Q9CXV1|DHSD_MOUSE	-0.0191927	-0.789462	Not Interesting
108655	g18480	sp|Q5FVK8|AL14E_RAT	0.864647	1.0921	Not Interesting
108671	g18492	sp|Q6ZW76|ANKS3_HUMAN	-0.460372	-0.801492	Not Interesting
108677	g18492	sp|Q6ZW76|ANKS3_HUMAN	-1.3409	-1.45733	Not Interesting
108681	g18492	sp|Q6ZW76|ANKS3_HUMAN	-0.647733	-0.246812	Not Interesting
108701	g14399	sp|P50123|AMPE_RAT	0.605126	0.86954	Not Interesting
108710	g14402	sp|Q6DG32|S2536_DANRE	0.664296	1.64803	Not Interesting
108711	g14402	sp|Q6DG32|S2536_DANRE	0.20369	1.22761	Not Interesting
108712	g14403	sp|Q9CX48|ZCH10_MOUSE	0.820067	0.863024	Not Interesting
108719	g14404	sp|P46926|GNPI1_HUMAN	-0.0101861	1.05169	Not Interesting
108725	g14405	NA	-0.235512	-0.83739	Not Interesting
108732	g14405	NA	0.589714	0.761206	Not Interesting
108746	g14409	NA	-0.26349	-0.921136	Not Interesting
108769	g31427	NA	-0.943572	-1.15482	Not Interesting
108780	g31433	sp|P03010|TRAC9_MAIZE	0.557959	0.350579	Not Interesting
108832	g31441	sp|Q6PFK1|ZN598_DANRE	-0.736861	-0.764451	Not Interesting
108836	g31441	sp|Q6PFK1|ZN598_DANRE	-0.0651898	-0.524224	Not Interesting
108849	g31445	NA	-0.578621	-0.491475	Not Interesting
108851	g31445	NA	-0.626742	-0.55214	Not Interesting
108852	g31445	NA	-2.60912	-1.81512	Not Interesting
108856	g31445	NA	-1.11504	-0.79779	Not Interesting
10886	g2833	NA	-0.399519	-0.622865	Not Interesting
108868	g31447	sp|Q91W20|LRC26_MOUSE	-0.550738	-0.511532	Not Interesting
108901	g31460	sp|Q7Z494|NPHP3_HUMAN	-0.693865	-1.09448	Not Interesting
10891	g2833	NA	0.447111	0.899925	Not Interesting
108910	g31461	sp|Q7Z494|NPHP3_HUMAN	0.664451	0.730489	Not Interesting
108916	g31462	sp|P17126|ACT_HYDVU	0.421599	0.910221	Not Interesting
108918	g31462	sp|P17126|ACT_HYDVU	0.631907	0.495619	Not Interesting
108920	g31462	sp|P17126|ACT_HYDVU	0.553387	0.97162	Not Interesting
108925	g31463	sp|P21328|RTJK_DROME	0.654639	1.11336	Not Interesting
108929	g31464	sp|Q149F3|ERF3B_MOUSE	-0.708844	-1.32086	Not Interesting
10895	g2834	sp|Q1ZXH8|GXCDD_DICDI	0.503171	0.737596	Not Interesting
10896	g2834	sp|Q1ZXH8|GXCDD_DICDI	1.06268	1.18227	Not Interesting
108979	g31121	NA	-0.974014	-0.904324	Not Interesting
109018	g27210	NA	-0.583885	-0.382901	Not Interesting
109045	g27218	sp|P98154|IDD_MOUSE	-0.926748	-1.01137	Not Interesting
109067	g27219	sp|P53814|SMTN_HUMAN	-0.805137	-1.33849	Not Interesting
109071	g27219	sp|P53814|SMTN_HUMAN	-1.00003	-1.07725	Not Interesting
109074	g27219	sp|P53814|SMTN_HUMAN	0.634516	0.934707	Not Interesting
109094	g27221	NA	-0.994122	-0.667916	Not Interesting
109108	g27225	NA	-2.01285	-0.105223	Not Interesting
109156	g16503	sp|P56696|KCNQ4_HUMAN	-0.682449	-0.796982	Not Interesting
10925	NA	NA	0.901195	1.17896	Not Interesting
109258	g16543	NA	0.598418	0.569073	Not Interesting
109300	g16549	sp|Q8BHJ5|TBL1R_MOUSE	-0.127474	-0.460932	Not Interesting
109315	g16556	NA	-0.09202	-0.837675	Not Interesting
109321	g16557	sp|Q09604|VAB15_CAEEL	-1.77556	-0.828399	Not Interesting
109322	g16557	sp|Q09604|VAB15_CAEEL	-0.976241	-0.111977	Not Interesting
109323	g16557	sp|Q09604|VAB15_CAEEL	-1.07343	-1.48181	Not Interesting
109324	g16557	sp|Q09604|VAB15_CAEEL	-1.25109	-0.623478	Not Interesting
109334	g16558	sp|P72745|Y1101_SYNY3	1.08433	1.30142	Not Interesting
109347	g5272	sp|Q9NSK0|KLC4_HUMAN	-0.242971	-0.5636	Not Interesting
109348	g5272	sp|Q9NSK0|KLC4_HUMAN	-0.599543	-0.5391	Not Interesting
109394	g5289	sp|Q7ZUW2|HYOU1_DANRE	0.32705	0.72002	Not Interesting
10943	g2838	sp|P55075|FGF8_HUMAN	-0.21614	-0.806517	Not Interesting
10948	g2839	NA	0.688839	0.644203	Not Interesting
109487	g17136	sp|P56696|KCNQ4_HUMAN	-1.23169	-1.16272	Not Interesting
109501	g17139	sp|Q90610|NEO1_CHICK	0.453468	0.783388	Not Interesting
109517	g17144	sp|Q9R0Y1|ASIC5_MOUSE	0.558159	0.896295	Not Interesting
109521	g17146	sp|Q7JQ07|MOS1T_DROMA	0.466122	0.913975	Not Interesting
109542	g17150	sp|Q02006|Y4233_RHOPA	0.960853	0.868645	Not Interesting
109578	g17155	NA	0.705828	0.774493	Not Interesting
109713	g6525	NA	-0.517352	-1.18808	Not Interesting
109720	g6526	sp|P13116|SRC2_XENLA	0.606841	0.279394	Not Interesting
109757	g6538	NA	-1.66018	-0.504693	Head
109758	g6538	NA	-1.40839	-0.650253	Not Interesting
109759	g6538	NA	-1.54394	-1.12364	Not Interesting
109761	g6538	NA	-0.722432	0.0624292	Not Interesting
109783	g6546	sp|Q8K430|KLH17_RAT	1.16409	1.2099	Not Interesting
109797	g6549	sp|Q9CYL5|GAPR1_MOUSE	0.752892	0.595866	Not Interesting
10982	g2851	sp|Q24509|STX5_DROME	0.432238	0.130892	Not Interesting
109844	g6562	NA	-1.10795	-1.00686	Not Interesting
109858	g6563	sp|Q8R3S2|TSN33_MOUSE	-0.858132	-1.1034	Not Interesting
109908	g1649	sp|Q9GNN8|CTXA_CARAL	0.525833	0.431342	Not Interesting
109912	g1651	sp|Q9D531|NXNL2_MOUSE	-0.282395	-0.822084	Not Interesting
109922	g1652	NA	0.279108	0.911771	Not Interesting
109943	g1659	NA	-1.9621	-1.4826	Not Interesting
109959	g1667	sp|C9J069|CI172_HUMAN	1.08471	0.25678	Not Interesting
109960	g1668	sp|Q94K49|ALP1_ARATH	0.682061	0.0764241	Not Interesting
109984	g1673	sp|D3YXG0|HMCN1_MOUSE	0.12051	0.634357	Not Interesting
110075	g9136	sp|Q5HZE0|MCATL_RAT	-0.714964	-0.628784	Not Interesting
110080	g9138	sp|Q9QXA6|BAT1_MOUSE	-1.11623	-0.917863	Not Interesting
110109	g9162	NA	-0.642228	-0.954371	Not Interesting
11012	NA	NA	-0.371168	-0.832002	Not Interesting
110132	g31949	NA	-0.814407	-0.842742	Not Interesting
110143	g31950	NA	-0.951186	-1.69827	Not Interesting
110152	g31952	NA	-0.659795	-0.397364	Not Interesting
110157	g31953	NA	0.590471	0.717258	Not Interesting
110175	g31954	sp|P42583|NKX25_XENLA	1.0385	0.717497	Not Interesting
110190	g31958	NA	-1.99668	-0.661468	Not Interesting
110191	g31958	NA	-0.970288	-0.265727	Not Interesting
110193	g31959	NA	-1.76323	-0.589983	Not Interesting
110197	g31959	NA	0.895315	1.98932	Not Interesting
11029	g1086	sp|Q640L5|CCD18_MOUSE	0.833083	0.66976	Not Interesting
110295	g29503	sp|Q8BGX0|TRI23_MOUSE	2.06775	2.20045	Not Interesting
110310	g29507	sp|Q0IJ05|OSBL9_XENTR	0.462972	0.633073	Not Interesting
110327	g29508	NA	0.483948	0.785628	Not Interesting
1104	g13514	sp|Q9BX10|GTPB2_HUMAN	1.0618	1.69578	Not Interesting
110417	g7438	sp|P54802|ANAG_HUMAN	-0.575452	-0.906806	Not Interesting
110458	g33690	sp|P21328|RTJK_DROME	-0.76605	0.64416	Head
110460	g33691	NA	0.280848	0.628912	Not Interesting
110536	g13010	NA	-0.303388	-0.8301	Not Interesting
110538	g13010	NA	-0.530047	-0.785523	Not Interesting
110562	g13017	sp|Q13591|SEM5A_HUMAN	-1.04343	-0.647933	Not Interesting
110564	g13017	sp|Q13591|SEM5A_HUMAN	-0.840989	-0.493331	Not Interesting
110568	g13019	sp|P16273|PRPX_HORVU	0.58996	0.881756	Not Interesting
110575	g13020	sp|P16273|PRPX_HORVU	-0.0909193	-0.672237	Not Interesting
110609	g9117	NA	0.620248	0.897517	Not Interesting
110614	g9118	NA	2.0853	2.82799	Not Interesting
110719	g22612	sp|Q91827|AR1_XENLA	-0.552075	-0.706703	Not Interesting
110733	g22615	sp|Q8HYJ7|FUT5_GORGO	1.14245	1.27732	Not Interesting
110734	g22615	sp|Q8HYJ7|FUT5_GORGO	0.719463	0.677006	Not Interesting
110735	g22615	sp|Q8HYJ7|FUT5_GORGO	0.761842	0.831118	Not Interesting
11074	g1102	NA	0.710452	0.94606	Not Interesting
110741	g22615	sp|Q8HYJ7|FUT5_GORGO	1.87345	2.64152	Not Interesting
110743	g22616	sp|Q5DQR4|STB5L_MOUSE	1.36661	1.67397	Not Interesting
110744	g22616	sp|Q5DQR4|STB5L_MOUSE	0.961966	1.43443	Not Interesting
110800	g31753	NA	-0.419964	-0.639285	Not Interesting
110811	g31756	NA	-1.13124	-0.710747	Not Interesting
110875	g31795	sp|Q8ETH0|HMP_OCEIH	-1.10322	-0.887941	Not Interesting
110911	g31803	NA	-0.675122	-0.295834	Not Interesting
110934	g31813	sp|Q6PBK1|CCD58_DANRE	0.66094	0.435323	Not Interesting
110970	g18772	sp|Q626N3|TM151_CAEBR	-0.949484	-1.26341	Not Interesting
110984	g1122	NA	1.50745	1.34073	Not Interesting
111002	g1127	sp|Q9NXR5|ANR10_HUMAN	0.360918	0.840101	Not Interesting
111067	g1145	sp|P35546|RET_MOUSE	-0.786828	-0.901038	Not Interesting
111105	g1155	sp|Q86HQ2|ABCG8_DICDI	0.212057	-0.843475	Not Interesting
111132	g1173	sp|C0HBB2|GLMP_SALSA	-1.03461	-1.27544	Not Interesting
111148	g1177	sp|Q00174|LAMA_DROME	-0.435983	-0.575537	Not Interesting
111187	g1205	NA	-1.05885	-0.511178	Not Interesting
111191	g1206	NA	0.47504	0.701018	Not Interesting
111231	g3593	NA	-0.914394	-1.15566	Not Interesting
111264	g2400	sp|E2JA28|DDAC_ENTAG	0.694407	0.124813	Not Interesting
111300	g21198	NA	0.527688	0.335347	Not Interesting
111329	g21203	NA	-0.476402	-0.649436	Not Interesting
111387	g21219	sp|Q90623|MYPT1_CHICK	0.750601	0.909386	Not Interesting
111467	g33476	NA	1.24229	1.68674	Not Interesting
111473	g33477	sp|Q24799|MYPH_ECHGR	-0.714888	-0.554273	Not Interesting
111494	g33492	NA	0.865664	0.644214	Not Interesting
111496	g33492	NA	-1.26345	-0.269211	Head
111498	g33492	NA	-2.64173	-1.73984	Not Interesting
111508	g33493	sp|B3LYS5|FOXO_DROAN	-0.721749	-0.244627	Not Interesting
111509	g33493	sp|B3LYS5|FOXO_DROAN	-1.0369	-0.404021	Not Interesting
111510	g33493	sp|B3LYS5|FOXO_DROAN	-1.50422	-1.23436	Not Interesting
111578	g23188	sp|P31646|S6A13_RAT	-0.238961	-0.466208	Not Interesting
111579	g23188	sp|P31646|S6A13_RAT	-0.778104	-1.17829	Not Interesting
111623	g23196	NA	-1.01175	-1.03506	Not Interesting
111671	g14832	sp|B0UYT5|MFD6B_DANRE	0.354747	0.700489	Not Interesting
111673	g14832	sp|B0UYT5|MFD6B_DANRE	-0.834299	-0.992308	Not Interesting
111711	g9166	sp|Q8UWA5|CAH2_TRIHK	-1.12328	-0.694672	Not Interesting
111713	g9166	sp|Q8UWA5|CAH2_TRIHK	0.506363	0.982583	Not Interesting
111714	g9166	sp|Q8UWA5|CAH2_TRIHK	-0.523436	-0.737273	Not Interesting
111715	g9166	sp|Q8UWA5|CAH2_TRIHK	-0.374119	0.563751	Head
111730	g9167	sp|Q8UWA5|CAH2_TRIHK	0.489498	0.62227	Not Interesting
111738	g9168	sp|P35072|TCB1_CAEBR	0.399991	0.864072	Not Interesting
111741	g9168	sp|P35072|TCB1_CAEBR	-0.829061	-0.140425	Not Interesting
111755	g9170	sp|Q99808|S29A1_HUMAN	0.818334	1.0546	Not Interesting
111773	g9180	NA	-0.926669	-0.719213	Not Interesting
111864	g9208	NA	-0.684159	-0.329647	Not Interesting
111940	g21939	NA	-0.0690004	-0.785111	Not Interesting
111958	g21950	NA	3.77506	5.26893	Not Interesting
111971	g9892	NA	-0.266457	-0.713691	Not Interesting
111977	g9893	sp|Q2Q426|AGRE2_MACMU	-1.0154	-0.98693	Not Interesting
112164	g7731	NA	1.19182	1.36985	Not Interesting
112166	g7731	NA	-0.356014	-0.732719	Not Interesting
112172	g7731	NA	-0.616772	-1.10208	Not Interesting
112213	g410	sp|P31580|HCE1_ORYLA	0.455303	0.699163	Not Interesting
112217	g413	NA	-0.167723	-0.433915	Not Interesting
112218	g414	sp|G3X9K3|BIG1_MOUSE	0.773247	1.3272	Not Interesting
112249	g422	sp|Q5BK46|RNH1_RAT	0.327374	0.59677	Not Interesting
11226	g29761	sp|P25927|BIGA_SALTY	-0.833234	-0.660182	Not Interesting
112267	g431	NA	0.702159	0.574441	Not Interesting
112311	g442	NA	-0.253762	-0.758381	Not Interesting
112337	g445	NA	-0.730761	-1.27996	Not Interesting
112351	g447	sp|Q8IZF6|AGRG4_HUMAN	0.725825	1.53631	Not Interesting
112357	g447	sp|Q8IZF6|AGRG4_HUMAN	-0.84852	0.211548	Not Interesting
112364	g448	NA	0.333885	0.62713	Not Interesting
112371	g449	sp|Q9JHJ0|TMOD3_MOUSE	-0.649332	-0.718638	Not Interesting
112379	g450	NA	-0.576855	-1.16218	Not Interesting
112386	g453	sp|P21213|HUTH_RAT	-0.575145	-0.284546	Not Interesting
112402	g453	sp|P21213|HUTH_RAT	-1.62996	-0.140396	Not Interesting
112403	g453	sp|P21213|HUTH_RAT	-0.765712	-0.445196	Not Interesting
112421	g15133	sp|Q6MG82|PRRT1_RAT	0.480454	1.47604	Not Interesting
112446	g15139	sp|Q8BTJ4|ENPP4_MOUSE	0.409718	0.313041	Not Interesting
112458	g15141	sp|A4IG66|TM201_DANRE	-0.550705	0.0910481	Not Interesting
112484	g15148	sp|Q5R501|OST48_PONAB	0.634783	0.933929	Not Interesting
112555	g15171	sp|P59742|NGB1_ONCMY	-0.560254	-0.311982	Not Interesting
11258	g29767	sp|P29288|PPA5_RAT	0.546571	0.460327	Not Interesting
11259	g29767	sp|P29288|PPA5_RAT	1.48401	0.840895	Not Interesting
112614	g11408	sp|Q9Z254|GIPC1_RAT	-1.11656	-1.12864	Not Interesting
112639	g11437	sp|Q96PM5|ZN363_HUMAN	-0.657361	-0.386499	Not Interesting
112655	g10863	NA	-1.04876	-1.17067	Not Interesting
112730	g9717	sp|P34528|YM67_CAEEL	-0.16185	-0.659719	Not Interesting
112747	g9721	NA	-0.383346	-0.922251	Not Interesting
112748	g9722	NA	-1.39915	-0.410567	Not Interesting
112864	g18506	NA	0.401528	0.825235	Not Interesting
1129	g13520	NA	0.448058	1.06429	Not Interesting
112922	g21235	sp|Q94BZ1|ZIFL1_ARATH	0.754127	0.7884	Not Interesting
112933	g21237	NA	-0.520624	-0.868371	Not Interesting
112937	g21238	sp|Q9P2K1|C2D2A_HUMAN	-1.05284	-0.775834	Not Interesting
11294	g26726	NA	-0.242972	-1.10577	Not Interesting
112977	g21243	sp|Q5ZIE8|MCAF1_CHICK	-0.669644	-0.580352	Not Interesting
113006	g22817	sp|Q5HY64|FA47C_HUMAN	0.701296	0.946319	Not Interesting
113011	g22818	NA	-0.938536	-0.505514	Not Interesting
11303	g26728	NA	0.598408	1.04007	Not Interesting
113051	g28522	NA	-0.508721	-1.1205	Not Interesting
113067	g28523	NA	-0.599403	-1.15241	Not Interesting
113091	g5911	sp|P47810|WEE1_MOUSE	-1.13003	-1.575	Not Interesting
113105	g5916	sp|Q3SYZ3|CR3L3_BOVIN	0.292863	0.694717	Not Interesting
113161	g5926	sp|P10076|ZFP26_MOUSE	-0.529964	-1.01611	Not Interesting
113162	g5926	sp|P10076|ZFP26_MOUSE	-0.747329	-1.64738	Not Interesting
113268	g15379	NA	-0.241552	-0.614042	Not Interesting
113284	g15382	sp|Q6ZSS7|MFSD6_HUMAN	0.412153	0.681513	Not Interesting
113401	g29654	sp|Q28C55|DLG1_XENTR	-0.998353	-1.31575	Not Interesting
113428	g29660	sp|Q9D0B5|TSTD3_MOUSE	0.581704	0.407372	Not Interesting
11344	g9842	NA	-0.618978	-0.64326	Not Interesting
113442	g29664	NA	0.863678	1.00718	Not Interesting
113533	g19480	sp|Q9VAS7|INX3_DROME	-0.814257	-1.09041	Not Interesting
113557	g19495	NA	-1.00434	-0.532676	Not Interesting
113563	g19495	NA	0.579761	0.688246	Not Interesting
113609	g19503	sp|O35491|CLK2_MOUSE	0.761889	0.935682	Not Interesting
113642	g19513	sp|Q8WQI5|RS8_SPOFR	0.794693	0.232556	Not Interesting
113709	g24015	sp|Q8BG58|P4HTM_MOUSE	-0.375273	-0.654313	Not Interesting
113736	g24023	sp|Q566L7|LS14B_XENTR	-0.927287	-0.890081	Not Interesting
113747	g24024	sp|Q91X58|ZFN2B_MOUSE	0.651684	2.30377	Not Interesting
113775	g24036	NA	0.385131	1.73054	Not Interesting
113776	g24036	NA	1.13397	2.41578	Not Interesting
113777	g24036	NA	1.44715	2.70915	Not Interesting
113778	g24036	NA	0.926159	2.62248	Not Interesting
113782	g24037	NA	2.35543	3.34937	Not Interesting
113783	g24037	NA	-0.60164	-0.321635	Not Interesting
113784	g24037	NA	0.570104	1.81332	Not Interesting
113796	g24037	NA	1.15507	1.81628	Not Interesting
113803	g24040	sp|P41105|RL28_MOUSE	0.620502	0.350928	Not Interesting
113812	g24043	NA	-0.712489	-0.841135	Not Interesting
113813	g24043	NA	-0.567746	-0.947782	Not Interesting
113832	g24047	sp|Q9C0J1|B3GN4_HUMAN	0.240948	0.701748	Not Interesting
113833	g24047	sp|Q9C0J1|B3GN4_HUMAN	0.737679	1.00871	Not Interesting
11384	g9861	sp|Q6V1X1|DPP8_HUMAN	-0.83147	-0.560795	Not Interesting
113855	g217	sp|Q94900|GLUCL_DROME	0.729569	0.658681	Not Interesting
113876	g224	NA	-0.169839	-0.701793	Not Interesting
113915	g24534	sp|Q1PSW8|LIN41_MOUSE	0.233877	0.757661	Not Interesting
113939	g24534	sp|Q1PSW8|LIN41_MOUSE	0.604162	1.19991	Not Interesting
113955	g24542	sp|Q95KH6|RGF1C_MACFA	-0.56909	-1.14917	Not Interesting
11396	g9871	sp|Q6P2K6|P4R3A_MOUSE	0.297249	0.721702	Not Interesting
113977	g24548	sp|Q6Q4H1|JMJD6_HYDVU	-0.0124103	0.739791	Not Interesting
113996	g9519	sp|Q804Q5|FEZF2_DANRE	0.740288	0.749824	Not Interesting
113999	g9519	sp|Q804Q5|FEZF2_DANRE	-0.769797	0.520556	Head
114014	g9521	sp|Q4V9P6|ADAL_DANRE	0.776724	0.85404	Not Interesting
114070	g9542	sp|Q6GL75|DCC1_XENTR	-0.950259	-0.559954	Not Interesting
114071	g9542	sp|Q6GL75|DCC1_XENTR	-0.33315	-0.790332	Not Interesting
114073	g9543	sp|O55164|MPDZ_RAT	-0.662749	-1.25263	Not Interesting
114081	g9549	NA	1.14128	0.852085	Not Interesting
114092	g9551	sp|P38978|KS1_HYDVU	-0.405652	-0.668062	Not Interesting
114137	g27076	sp|Q8N5D0|WDTC1_HUMAN	-0.395407	-0.723414	Not Interesting
114187	g27082	sp|Q80U40|RIMB2_MOUSE	-0.609548	-0.754569	Not Interesting
114206	g27085	NA	0.494733	0.501534	Not Interesting
11421	g9881	sp|Q9NVS2|RT18A_HUMAN	-0.80925	-1.41413	Not Interesting
114266	g27101	NA	-0.0390372	0.80742	Not Interesting
114297	g27119	NA	-0.829853	-1.31131	Not Interesting
114311	g32680	sp|Q5E965|C56D2_BOVIN	-0.276703	-0.490004	Not Interesting
114316	g32682	NA	-0.874473	-1.00454	Not Interesting
11433	g9882	NA	-1.46289	-1.16114	Not Interesting
114396	g32707	sp|Q9NQC3|RTN4_HUMAN	-0.993076	-1.05896	Not Interesting
1144	g13529	NA	1.19353	1.27765	Not Interesting
114454	g18777	NA	-0.555271	-0.31889	Not Interesting
114461	g18777	NA	0.486469	0.299345	Not Interesting
114471	g18779	sp|Q61041|NPY4R_MOUSE	-1.04709	-1.84442	Not Interesting
114473	g18779	sp|Q61041|NPY4R_MOUSE	-0.228087	-0.714488	Not Interesting
114474	g18779	sp|Q61041|NPY4R_MOUSE	-0.128172	-1.10318	Not Interesting
114481	g18781	sp|Q9VUL9|FUCTA_DROME	-0.416642	-0.692691	Not Interesting
114513	g18788	NA	-0.664403	-0.573245	Not Interesting
114536	g26548	NA	1.00065	0.463859	Not Interesting
114565	g11925	sp|Q9BUZ4|TRAF4_HUMAN	0.438495	0.647067	Not Interesting
114568	g11925	sp|Q9BUZ4|TRAF4_HUMAN	-0.805771	0.116502	Not Interesting
114569	g11925	sp|Q9BUZ4|TRAF4_HUMAN	0.497562	0.839516	Not Interesting
114572	g11925	sp|Q9BUZ4|TRAF4_HUMAN	-0.490301	-1.01153	Not Interesting
114577	g11928	sp|A4FUD3|U5S1_BOVIN	0.316659	0.642502	Not Interesting
114613	g11946	NA	-0.0768209	-0.573888	Not Interesting
114617	g11950	sp|Q8CFH6|SIK2_MOUSE	1.19722	1.59387	Not Interesting
114622	g11950	sp|Q8CFH6|SIK2_MOUSE	0.501742	0.905096	Not Interesting
114630	g11951	NA	-0.812635	-0.428204	Not Interesting
114645	g11956	sp|Q5THJ4|VP13D_HUMAN	0.627053	0.612407	Not Interesting
114672	g11965	sp|O55005|ROBO1_RAT	0.756913	1.11255	Not Interesting
114701	g11977	NA	-0.621819	-0.957153	Not Interesting
114705	g11977	NA	-0.0627364	-0.483588	Not Interesting
114740	g11989	NA	0.83138	0.993537	Not Interesting
114755	g11994	NA	2.50076	2.97584	Not Interesting
114768	g11996	sp|A5PN43|TM175_DANRE	1.85754	3.30163	Not Interesting
114815	g12014	NA	-0.556927	-1.00906	Not Interesting
11486	g26528	sp|Q5RFU0|SIAE_PONAB	0.174513	0.992332	Not Interesting
114885	g23730	sp|Q28735|TMEDA_RABIT	-0.704844	-0.915197	Not Interesting
114888	g23731	NA	-0.841875	-1.13291	Not Interesting
114906	g23733	NA	0.714946	0.408822	Not Interesting
114918	g23740	NA	0.387405	0.403512	Not Interesting
114922	g23740	NA	-0.625851	-1.35122	Not Interesting
115053	g28082	sp|Q8N584|TT39C_HUMAN	0.548234	1.48225	Not Interesting
115077	g28084	sp|Q6DN12|MCTP2_HUMAN	-1.0973	-1.65892	Not Interesting
115114	g10	NA	-0.761799	-0.371847	Not Interesting
11514	g7365	NA	-0.692942	-0.385008	Not Interesting
115150	g14	sp|P49355|FNTB_BOVIN	0.51213	0.884234	Not Interesting
115157	g15	sp|P49355|FNTB_BOVIN	0.484564	0.427536	Not Interesting
115173	g19	sp|P25455|PIP1_DROME	-0.578467	-1.22513	Not Interesting
115187	g22	sp|Q15147|PLCB4_HUMAN	0.509074	0.396295	Not Interesting
115191	g23	NA	-0.329392	-0.74708	Not Interesting
115255	g7252	sp|Q8N2S1|LTBP4_HUMAN	-0.566312	-0.979608	Not Interesting
115285	g7260	sp|Q9D2E1|TSSK3_MOUSE	0.22075	0.375499	Not Interesting
115313	g7265	NA	-0.121099	-0.737376	Not Interesting
115324	g7267	sp|Q96MU8|KREM1_HUMAN	-1.17075	-0.418816	Not Interesting
115395	g21593	NA	0.164876	0.662222	Not Interesting
115408	g21597	sp|Q92047|PIMT_DANRE	0.149768	0.410874	Not Interesting
115421	g21601	NA	0.566624	0.394463	Not Interesting
115445	g21606	sp|B4PPK2|FOSL_DROYA	0.523855	0.742867	Not Interesting
115446	g21607	sp|Q96AT9|RPE_HUMAN	0.624746	0.847359	Not Interesting
115471	g21613	sp|Q4QQV8|CHMP5_RAT	1.11227	1.30064	Not Interesting
115472	g21613	sp|Q4QQV8|CHMP5_RAT	1.28869	1.6173	Not Interesting
115500	g21535	NA	0.381297	0.647985	Not Interesting
115532	g2688	sp|P35317|AT1A_HYDVU	0.432019	1.0006	Not Interesting
115535	g2689	sp|Q800K6|TOB1A_XENLA	-0.759174	-0.492047	Not Interesting
115591	g2705	sp|Q7Z494|NPHP3_HUMAN	0.361816	0.866751	Not Interesting
115613	g2707	NA	-0.602981	-0.896464	Not Interesting
115637	g2716	NA	1.02066	0.993469	Not Interesting
115638	g2716	NA	0.581088	0.375973	Not Interesting
115654	g2717	sp|Q05438|BMR1B_CHICK	-1.14163	0.290334	Head
115661	g2718	sp|Q9QZ67|PPM1D_MOUSE	-0.386398	-0.841373	Not Interesting
11572	g7343	sp|Q60631|GRB2_MOUSE	0.510403	0.704697	Not Interesting
115749	g24070	sp|P70567|TMOD1_RAT	-0.565541	-0.447077	Not Interesting
115751	g24070	sp|P70567|TMOD1_RAT	0.725731	0.515553	Not Interesting
11580	g7349	NA	0.63898	1.04561	Not Interesting
11581	g7349	NA	1.44161	2.30264	Not Interesting
115844	g17940	sp|Q24799|MYPH_ECHGR	0.37997	0.736126	Not Interesting
115873	g8441	NA	0.48492	0.811579	Not Interesting
11593	g7351	NA	0.49487	0.412792	Not Interesting
115941	g13406	sp|Q75N73|S39AE_MOUSE	-0.252187	-1.01593	Not Interesting
115942	g13406	sp|Q75N73|S39AE_MOUSE	-0.308855	-0.725943	Not Interesting
11607	g7354	NA	-0.352324	0.817051	Not Interesting
11608	g7354	NA	0.424901	0.7469	Not Interesting
11609	g7354	NA	0.398968	0.471348	Not Interesting
11653	g7374	sp|F1MBP6|KLHL3_BOVIN	-0.374715	-0.579818	Not Interesting
11736	g20054	NA	-0.546764	-0.986005	Not Interesting
11755	g17375	NA	-0.357496	-0.655175	Not Interesting
11773	g17379	sp|Q63035|NLRP6_RAT	0.714954	1.16329	Not Interesting
11813	g17392	sp|Q4R7D3|SAXO1_MACFA	-0.73657	-0.21585	Not Interesting
11879	g12322	sp|P40240|CD9_MOUSE	0.629783	0.991411	Not Interesting
11896	g12323	NA	1.21881	1.73615	Not Interesting
11947	g12342	sp|Q6TLI9|DRD2_MUSPF	0.487918	1.00125	Not Interesting
11948	g12342	sp|Q6TLI9|DRD2_MUSPF	2.17722	2.89558	Not Interesting
11949	g12342	sp|Q6TLI9|DRD2_MUSPF	2.2079	3.17645	Not Interesting
11951	g12342	sp|Q6TLI9|DRD2_MUSPF	0.498126	0.86897	Not Interesting
11973	g12355	NA	-0.336544	-0.808093	Not Interesting
12005	g12357	sp|Q9BXB5|OSB10_HUMAN	-0.743359	-0.577286	Not Interesting
12024	g12366	NA	-0.570127	-0.693592	Not Interesting
12104	g6256	NA	0.696197	0.848972	Not Interesting
12105	g6257	sp|Q5XXP2|OPN4_PHOSU	0.17807	0.645665	Not Interesting
12139	g21478	NA	-0.872478	0.0596997	Not Interesting
12151	g21479	sp|A1ZAX0|CCH1R_DROME	-0.635956	-0.034799	Not Interesting
12161	g21479	sp|A1ZAX0|CCH1R_DROME	-0.751888	-0.318815	Not Interesting
12188	g21488	sp|O57422|OPN4B_XENLA	-0.712724	-0.38736	Not Interesting
12192	g21488	sp|O57422|OPN4B_XENLA	-2.63313	-1.28176	Not Interesting
12216	g21492	sp|P08116|PVA_PLAFA	-1.51509	-0.194219	Head
12218	g21493	sp|P35072|TCB1_CAEBR	-0.513056	0.0229804	Not Interesting
1224	g28853	NA	0.677977	0.754891	Not Interesting
12247	g21508	NA	1.89061	2.13248	Not Interesting
12261	g19700	NA	-0.43018	-0.983035	Not Interesting
123	g18885	NA	-0.824289	-1.31003	Not Interesting
12318	g15446	sp|Q0VC80|YRDC_BOVIN	0.900213	0.895503	Not Interesting
12335	g15451	sp|P47799|FSHR_HORSE	1.2865	1.547	Not Interesting
12336	g15451	sp|P47799|FSHR_HORSE	1.14707	1.11618	Not Interesting
12369	g15460	sp|Q3SXY8|AR13B_HUMAN	-0.97842	-0.746184	Not Interesting
12382	g15465	sp|Q9BST9|RTKN_HUMAN	0.746643	0.77375	Not Interesting
12482	g19999	NA	-0.896214	-1.64866	Not Interesting
12498	g20005	sp|Q8WXI2|CNKR2_HUMAN	-0.499229	-0.839083	Not Interesting
12519	g5658	sp|Q8C6K9|CO6A6_MOUSE	-0.640152	-0.988605	Not Interesting
12528	g5660	sp|A8TX70|CO6A5_HUMAN	0.919616	0.82549	Not Interesting
12529	g5660	sp|A8TX70|CO6A5_HUMAN	0.521506	0.662387	Not Interesting
1256	g12686	NA	-0.578855	-0.760195	Not Interesting
12564	g33319	sp|D3YXG0|HMCN1_MOUSE	-0.256462	-0.951403	Not Interesting
12649	g23029	sp|Q5F2F2|ABH15_MOUSE	0.0477249	0.873383	Not Interesting
12650	g23029	sp|Q5F2F2|ABH15_MOUSE	0.422596	0.743455	Not Interesting
12653	g23030	sp|P31696|AGRIN_CHICK	-0.963014	0.0188448	Not Interesting
12678	g22580	NA	-0.352209	-0.720721	Not Interesting
12680	g22580	NA	-0.565145	-0.89586	Not Interesting
12693	g22585	sp|Q91Z46|DUS7_MOUSE	0.153152	0.552921	Not Interesting
12694	g22585	sp|Q91Z46|DUS7_MOUSE	0.628713	1.49668	Not Interesting
127	g18886	NA	0.827489	0.879482	Not Interesting
12729	g29219	sp|P35072|TCB1_CAEBR	-0.985915	-1.26627	Not Interesting
12814	g29256	sp|B9DFR3|PAE9_ARATH	-0.304938	-0.673614	Not Interesting
12830	g29260	sp|Q6PG95|CRML_MOUSE	0.574344	1.18006	Not Interesting
12850	g29264	sp|Q14185|DOCK1_HUMAN	-0.630532	-0.649046	Not Interesting
12864	g29266	sp|P51830|ADCY9_MOUSE	-0.517229	-0.861156	Not Interesting
12867	g29267	NA	1.10283	1.49695	Not Interesting
12868	g29267	NA	0.83312	1.18277	Not Interesting
12888	g29272	sp|P16395|ACM1_DROME	-0.490057	-0.835543	Not Interesting
12892	g29273	sp|O73755|GREM1_CHICK	-0.491611	-0.642298	Not Interesting
12907	g29284	sp|Q9NBX4|RTXE_DROME	-1.53245	-0.956766	Not Interesting
12924	g29288	NA	-1.45471	-0.871094	Not Interesting
12983	g29300	NA	0.655333	0.808425	Not Interesting
13005	g29308	sp|Q4L235|ACSF4_HUMAN	0.462321	1.49525	Not Interesting
13090	g29327	sp|Q96AJ9|VTI1A_HUMAN	0.818977	0.534845	Not Interesting
13091	g29328	NA	0.864017	0.701763	Not Interesting
13112	g29332	sp|O15974|OPSD2_MIZYE	-2.20273	-0.881296	Not Interesting
13155	g1349	sp|Q9BY15|AGRE3_HUMAN	-0.164618	-0.513903	Not Interesting
13168	g1351	NA	-0.882232	-0.604779	Not Interesting
13170	g1351	NA	-0.740763	0.161994	Not Interesting
13171	g1351	NA	-1.16166	0.113775	Head
13176	g1351	NA	-0.868224	-0.187976	Not Interesting
13204	g1359	NA	0.73563	1.19547	Not Interesting
13243	g1512	sp|P08770|TRA1_MAIZE	-0.457628	-0.850138	Not Interesting
13269	g30694	NA	-0.431122	-1.26183	Not Interesting
13283	g30699	sp|P16425|Y2R2_DROME	0.686116	0.859676	Not Interesting
13292	g30702	sp|Q4R3M6|NDUS5_MACFA	-0.337592	-0.942328	Not Interesting
13303	g30703	NA	-0.924316	-0.49605	Not Interesting
13339	g30707	sp|P20072|ANXA7_BOVIN	1.83247	1.67827	Not Interesting
13374	g30723	NA	0.408567	0.635162	Not Interesting
13387	g30724	NA	0.253146	1.01779	Not Interesting
13388	g30724	NA	0.779222	0.821215	Not Interesting
13389	g30724	NA	-0.645955	-0.890275	Not Interesting
13390	g30724	NA	-0.199531	0.73592	Not Interesting
13397	g30728	NA	0.345298	1.24642	Not Interesting
134	g18887	NA	-1.63275	-1.36399	Not Interesting
13400	g30728	NA	-0.371575	-0.835941	Not Interesting
13420	g30736	NA	-0.511975	-0.615047	Not Interesting
13487	g13307	sp|P41252|SYIC_HUMAN	0.87181	0.763467	Not Interesting
13499	g13309	sp|P41252|SYIC_HUMAN	1.00631	1.63837	Not Interesting
13511	g4995	sp|P63079|GBRB3_RAT	0.429175	0.594692	Not Interesting
13595	g29345	sp|P57729|RAB38_HUMAN	-0.279077	-1.02026	Not Interesting
13678	g32930	sp|Q2U7A3|ACT_ASPOR	0.684524	0.649546	Not Interesting
1368	g23833	sp|Q640L2|SPX3_XENLA	-0.177347	-0.88266	Not Interesting
13680	g32930	sp|Q2U7A3|ACT_ASPOR	-0.863174	-1.37237	Not Interesting
13684	g32930	sp|Q2U7A3|ACT_ASPOR	-0.703991	-0.308395	Not Interesting
13687	g32930	sp|Q2U7A3|ACT_ASPOR	-0.898023	-0.715321	Not Interesting
13718	g32943	NA	0.668409	0.759612	Not Interesting
1386	g23834	sp|Q640L2|SPX3_XENLA	-0.356179	-0.749212	Not Interesting
1392	g23835	sp|Q17QZ3|SPX3_BOVIN	-0.506077	-0.683729	Not Interesting
13969	g6415	sp|Q11075|YWV1_CAEEL	-0.873715	-0.449605	Not Interesting
13986	g6417	sp|Q9CZR2|NALD2_MOUSE	-0.214127	-0.409799	Not Interesting
14067	g9811	sp|A2AJ76|HMCN2_MOUSE	0.700914	1.31091	Not Interesting
14080	g9812	sp|O08962|KCNH2_RAT	0.445231	0.337648	Not Interesting
14082	g9812	sp|O08962|KCNH2_RAT	-0.994533	-0.0408169	Not Interesting
14092	g9814	NA	-0.51494	-0.740442	Not Interesting
14107	g9815	sp|P0C1Q2|PDE11_MOUSE	-0.386399	-0.861491	Not Interesting
14133	g9819	sp|P86179|CSL3_ONCKE	1.57591	2.50376	Not Interesting
14134	g9819	sp|P86179|CSL3_ONCKE	0.569645	0.97744	Not Interesting
14135	g9820	NA	0.396415	1.72864	Not Interesting
14152	g9822	sp|P22897|MRC1_HUMAN	0.651292	0.585928	Not Interesting
14184	g9827	sp|P22897|MRC1_HUMAN	0.238146	0.701128	Not Interesting
14223	g9835	sp|Q9I8S4|AZIN2_XENLA	-0.730968	-0.844832	Not Interesting
14337	g19217	NA	0.521168	0.298818	Not Interesting
1434	g11048	sp|Q64077|NK2R_CAVPO	1.64435	2.17882	Not Interesting
14349	g19218	NA	-0.267104	-0.854024	Not Interesting
14371	g19221	NA	-0.27672	-1.3742	Not Interesting
14389	g19222	NA	-1.38704	-0.792827	Not Interesting
14397	g19223	NA	-0.401605	-0.687557	Not Interesting
14418	g19231	sp|P20711|DDC_HUMAN	-0.139057	-0.953207	Not Interesting
1443	g11049	sp|P35072|TCB1_CAEBR	-1.03971	-0.55633	Not Interesting
1444	g11049	sp|P35072|TCB1_CAEBR	-2.07123	0.00317031	Head
1445	g11049	sp|P35072|TCB1_CAEBR	-0.832193	-0.169473	Not Interesting
14451	g19235	sp|O94818|NOL4_HUMAN	0.530807	0.844838	Not Interesting
14516	g9691	sp|Q9VHR6|ATG13_DROME	0.43993	1.1234	Not Interesting
14530	g9693	sp|P18503|CAS4_EPHMU	0.948212	0.908226	Not Interesting
14537	g9694	sp|Q6I6M7|FGF1_CYNPY	0.884026	0.920431	Not Interesting
14539	g9694	sp|Q6I6M7|FGF1_CYNPY	0.879592	1.07351	Not Interesting
14540	g9694	sp|Q6I6M7|FGF1_CYNPY	0.370105	1.18989	Not Interesting
1455	g11054	NA	-0.8012	-1.04503	Not Interesting
14572	g30677	sp|P91645|CAC1A_DROME	1.09846	1.81355	Not Interesting
1463	g11056	NA	0.749871	0.471042	Not Interesting
1464	g11056	NA	0.549409	0.633733	Not Interesting
1465	g11056	NA	0.77452	1.0451	Not Interesting
1466	g11056	NA	1.30542	1.40977	Not Interesting
14662	g19984	sp|Q02225|SKI_XENLA	-1.77981	-1.06965	Not Interesting
14664	g19984	sp|Q02225|SKI_XENLA	-1.57072	-0.0602207	Head
14665	g19984	sp|Q02225|SKI_XENLA	-0.342029	-0.897652	Not Interesting
14666	g19984	sp|Q02225|SKI_XENLA	-0.390193	0.107204	Not Interesting
14736	g22625	NA	-0.321815	-0.966505	Not Interesting
14769	g22636	NA	0.879962	1.22572	Not Interesting
14774	g22636	NA	0.802727	1.65019	Not Interesting
14780	g22637	NA	-1.1902	-0.970862	Not Interesting
14784	g22638	NA	-0.362515	-0.639023	Not Interesting
1480	g11059	sp|Q9BQI7|PSD2_HUMAN	1.01397	0.609475	Not Interesting
14817	g22646	sp|P0CH95|PHF8_DANRE	-0.658022	0.0271184	Not Interesting
14835	g22647	NA	0.705848	0.701518	Not Interesting
14836	g22647	NA	0.29225	0.775772	Not Interesting
14837	g22647	NA	0.0934971	2.15541	Head
14843	g22649	sp|P28867|KPCD_MOUSE	0.42233	0.200268	Not Interesting
14860	g22652	NA	0.670585	1.21645	Not Interesting
1487	g11061	NA	0.413238	0.730194	Not Interesting
1488	g11061	NA	0.206729	0.727322	Not Interesting
14884	g22657	sp|Q3ZCU0|YK006_HUMAN	-0.987915	-0.99212	Not Interesting
14908	g22663	NA	-1.13405	-0.445947	Not Interesting
14913	g22664	NA	-0.85067	-0.490155	Not Interesting
14936	g22671	sp|Q12792|TWF1_HUMAN	-0.802641	-1.45298	Not Interesting
14939	g22672	sp|O22943|STL1_ARATH	-0.494883	-0.79518	Not Interesting
14940	g22672	sp|O22943|STL1_ARATH	-0.31294	-0.830571	Not Interesting
14966	g22677	sp|Q8IWV2|CNTN4_HUMAN	0.0679475	0.587743	Not Interesting
14971	g22677	sp|Q8IWV2|CNTN4_HUMAN	0.488847	0.310277	Not Interesting
14972	g22677	sp|Q8IWV2|CNTN4_HUMAN	-0.105167	-0.519473	Not Interesting
14987	g22679	NA	0.249888	0.83255	Not Interesting
14989	g22680	sp|Q3E6S9|CNIF3_ARATH	-0.622899	-0.59974	Not Interesting
15037	g22695	NA	0.0721025	0.854543	Not Interesting
15049	g22705	sp|A7E2Z9|K132L_BOVIN	-1.14682	-1.00319	Not Interesting
15064	g10816	NA	-0.326989	-0.938828	Not Interesting
15076	g10818	sp|Q7TN88|PK1L2_MOUSE	-0.347561	-0.991004	Not Interesting
15086	g10820	NA	-0.201824	-0.690224	Not Interesting
15122	g234	sp|P05933|CALM_SCHPO	-0.748751	-0.972842	Not Interesting
15162	g244	NA	-0.761626	-0.886904	Not Interesting
15165	g245	sp|A7MB28|NDRG3_BOVIN	0.89994	1.30905	Not Interesting
15182	g248	NA	1.13419	0.922379	Not Interesting
15195	g258	sp|Q24UI6|IF2_DESHY	0.752603	0.437675	Not Interesting
15218	g268	sp|Q5REW1|IYD1_PONAB	-0.916244	-0.675723	Not Interesting
15221	g269	sp|Q9BGT1|TTC9C_MACFA	2.10871	2.56605	Not Interesting
15269	g14067	sp|Q3UYK3|TBCD9_MOUSE	-0.888616	-1.25787	Not Interesting
15300	g14074	sp|O88799|ZAN_MOUSE	-0.389382	-0.626595	Not Interesting
15302	g14074	sp|O88799|ZAN_MOUSE	-0.809788	-0.786238	Not Interesting
15306	g14074	sp|O88799|ZAN_MOUSE	-0.0337947	-0.546379	Not Interesting
15335	g14090	NA	0.697117	1.28035	Not Interesting
15424	g9073	sp|C6KSQ6|RAD50_PLAF7	-0.582352	-1.12518	Not Interesting
1545	g6615	NA	-0.356222	-0.717337	Not Interesting
15494	g31198	sp|Q8R4T9|UT2_MOUSE	-1.39859	-1.33937	Not Interesting
1551	g6616	NA	-0.651549	-0.939511	Not Interesting
15522	g20056	NA	-0.879006	-1.11428	Not Interesting
15542	g20062	sp|P18761|CAH6_MOUSE	-0.384208	-0.637736	Not Interesting
15565	g20071	sp|Q10462|CAH5_CAEEL	-1.00438	-0.900293	Not Interesting
15578	g20074	sp|Q6DDT1|INO1B_XENLA	0.752057	0.0056488	Not Interesting
15590	g20079	NA	0.633116	0.841115	Not Interesting
15615	g20083	sp|O57525|CP17A_RANDY	0.646945	1.72862	Not Interesting
15637	g20089	NA	-0.860949	-1.11979	Not Interesting
1565	g6618	sp|Q5RC90|NCS1_PONAB	-0.44748	-1.38683	Not Interesting
15691	g20102	NA	-0.355425	-0.842941	Not Interesting
1570	g6619	NA	0.639451	0.323205	Not Interesting
15766	g20115	NA	0.559943	0.584619	Not Interesting
15780	g20118	NA	0.0430476	0.499018	Not Interesting
15822	g27127	sp|Q8CJ12|AGRG2_MOUSE	-0.648913	-0.914866	Not Interesting
15833	g27128	NA	-0.787663	-1.1527	Not Interesting
15933	g21756	sp|Q6Q629|DPP10_RAT	0.564153	0.884797	Not Interesting
15960	g21761	sp|Q9Y5R5|DMRT2_HUMAN	-2.08918	-0.342404	Head
15962	g21761	sp|Q9Y5R5|DMRT2_HUMAN	-0.0797979	-0.592714	Not Interesting
16020	g21782	sp|P13135|CPNS1_BOVIN	0.614403	1.05809	Not Interesting
16030	g21784	NA	-0.279048	-0.534169	Not Interesting
16049	g21790	sp|P41044|CAB32_DROME	0.80004	0.986297	Not Interesting
16100	g21805	sp|Q9P2N4|ATS9_HUMAN	0.765701	0.702792	Not Interesting
16108	g21806	sp|Q66HE7|CDKL1_RAT	-1.08843	0.366165	Not Interesting
16112	g21807	sp|Q6AXJ9|CDKL1_DANRE	-0.674132	-0.00753541	Not Interesting
16197	g22276	sp|P30664|MCM4B_XENLA	-0.298673	-1.07782	Not Interesting
16300	g3221	sp|Q7T2H2|FGRL1_CHICK	0.443304	1.215	Not Interesting
16304	g3223	NA	-0.611384	-1.02004	Not Interesting
1636	g6635	sp|Q7Z7L7|ZER1_HUMAN	0.788862	0.465533	Not Interesting
16447	g9398	sp|Q5E9Y6|PRUNE_BOVIN	0.405707	0.669748	Not Interesting
1645	g6636	NA	0.915167	0.903451	Not Interesting
16495	g13655	sp|Q8IVV2|LOXH1_HUMAN	-0.598223	-0.701546	Not Interesting
16632	NA	NA	-0.580181	-0.860787	Not Interesting
16638	NA	NA	-1.11389	-0.927043	Not Interesting
1666	g6643	NA	0.753045	0.552923	Not Interesting
16711	g27953	sp|Q62432|SMAD2_MOUSE	-1.33627	-0.394456	Not Interesting
16739	g27960	NA	-0.665858	-0.789566	Not Interesting
16758	g9102	sp|Q00534|CDK6_HUMAN	-0.357069	-0.722998	Not Interesting
16774	g9107	sp|D3YXS5|KIF28_MOUSE	-0.638021	-1.03466	Not Interesting
16803	g32575	NA	-0.607893	-0.930764	Not Interesting
16830	g21975	sp|Q8IZF6|AGRG4_HUMAN	-1.47917	-0.627501	Not Interesting
16851	g13918	sp|P31836|NCAM1_BOVIN	0.698237	0.646655	Not Interesting
16880	g13927	NA	-0.288623	0.486734	Head
16890	g13928	sp|Q6GM44|MARH5_XENLA	-0.434502	-0.917478	Not Interesting
16912	g13929	sp|Q5RA22|5NTC_PONAB	-1.05175	-1.40796	Not Interesting
17058	g8428	NA	0.440732	0.991658	Not Interesting
1708	g6657	sp|Q8NI77|KI18A_HUMAN	0.704532	0.135776	Not Interesting
17097	g32900	NA	0.888633	1.20511	Not Interesting
1710	g6657	sp|Q8NI77|KI18A_HUMAN	0.526164	1.15529	Not Interesting
17115	g32915	sp|Q28C98|MESH1_XENTR	0.687103	0.425081	Not Interesting
17117	g32916	NA	-0.254086	-0.552259	Not Interesting
17129	g32919	NA	-0.889437	-1.13555	Not Interesting
17141	g32919	NA	-1.04492	-1.13125	Not Interesting
17144	g32919	NA	0.974343	1.05346	Not Interesting
17187	g16118	NA	0.365441	0.900236	Not Interesting
17213	g7459	sp|P78325|ADAM8_HUMAN	-0.0928189	-0.974445	Not Interesting
17217	g7460	sp|O15204|ADEC1_HUMAN	-1.08553	-0.313164	Not Interesting
17233	g154	sp|P11680|PROP_MOUSE	-0.516123	-1.00888	Not Interesting
17240	g156	NA	0.102282	0.730268	Not Interesting
17261	g160	NA	-1.02909	0.28864	Head
1728	g3599	NA	0.309247	0.472986	Not Interesting
17320	g184	sp|P19440|GGT1_HUMAN	-0.243964	-0.546868	Not Interesting
17352	g194	sp|Q59536|PTRB_MORLA	-0.946709	-0.776643	Not Interesting
17358	g196	sp|Q9PV90|RLA0_DANRE	0.619655	0.194086	Not Interesting
17393	g210	NA	-0.45771	-0.707757	Not Interesting
17406	g213	NA	0.824919	0.921005	Not Interesting
17410	g213	NA	-0.902839	-0.666051	Not Interesting
1743	g3603	NA	-0.524736	-0.708009	Not Interesting
1744	g3603	NA	-0.252307	-0.467264	Not Interesting
17459	g4670	NA	2.16262	2.13277	Not Interesting
17460	g4670	NA	1.18043	1.20833	Not Interesting
17504	g4679	sp|Q7U6F4|RIMK_SYNPX	-0.775461	-0.48054	Not Interesting
17522	g14003	sp|O35607|BMPR2_MOUSE	-0.539055	-0.863042	Not Interesting
1753	g3605	NA	-0.715415	-0.00117086	Not Interesting
17539	g14012	sp|Q9NYL2|MLTK_HUMAN	1.55318	1.50696	Not Interesting
17547	g4757	NA	0.861097	1.36489	Not Interesting
17570	g1742	sp|Q5XXP2|OPN4_PHOSU	0.626964	0.751121	Not Interesting
17571	g1742	sp|Q5XXP2|OPN4_PHOSU	0.575964	1.1194	Not Interesting
17572	g1742	sp|Q5XXP2|OPN4_PHOSU	0.256861	1.59688	Head
17574	g1743	sp|Q16363|LAMA4_HUMAN	0.608192	1.06758	Not Interesting
17575	g1743	sp|Q16363|LAMA4_HUMAN	1.85723	1.98727	Not Interesting
17587	g1744	sp|Q00174|LAMA_DROME	1.15732	1.35881	Not Interesting
17642	g1757	NA	0.75649	1.0026	Not Interesting
17643	g1758	NA	-0.702621	-1.39733	Not Interesting
17666	g1764	NA	0.336493	0.894683	Not Interesting
17681	g1768	sp|Q6GP53|NAA50_XENLA	-0.564144	0.15628	Head
17684	g1768	sp|Q6GP53|NAA50_XENLA	0.635251	0.666028	Not Interesting
17704	g1775	NA	-0.480855	-0.916139	Not Interesting
17729	g1781	sp|P28075|PSB5_RAT	0.661205	0.877363	Not Interesting
17748	g1784	NA	0.275075	0.782357	Not Interesting
17767	g1803	NA	-1.18257	-0.667327	Not Interesting
17786	g1822	sp|A1VGB0|HLDD_DESVV	0.207082	0.945808	Not Interesting
1783	g3621	NA	-0.510026	-0.581859	Not Interesting
17831	g1836	sp|Q8AWH3|SX17A_XENTR	0.45883	0.752485	Not Interesting
17832	g1836	sp|Q8AWH3|SX17A_XENTR	1.14313	1.36768	Not Interesting
1784	g3621	NA	-0.447327	-0.493321	Not Interesting
17860	g1844	sp|Q90Z10|RL13_DANRE	1.7403	1.78912	Not Interesting
17883	g1849	NA	0.0783407	1.05407	Not Interesting
17902	g1856	NA	0.654655	0.808238	Not Interesting
17916	g1858	sp|Q2Z1R2|SOX1B_DANRE	-0.631296	-0.729799	Not Interesting
17922	g1858	sp|Q2Z1R2|SOX1B_DANRE	-2.03429	-1.66774	Not Interesting
17930	g1865	sp|Q95SX7|RTBS_DROME	-0.335828	-0.737331	Not Interesting
17942	g1868	sp|Q02391|GSLG1_CHICK	-0.0237459	0.671775	Not Interesting
17991	g1874	sp|P56945|BCAR1_HUMAN	0.530805	0.390153	Not Interesting
17992	g1874	sp|P56945|BCAR1_HUMAN	-0.617843	-0.726855	Not Interesting
18009	g1877	sp|Q6TMK4|POXA_DICDI	-0.710455	-0.774179	Not Interesting
18010	g1877	sp|Q6TMK4|POXA_DICDI	-0.796557	-0.250482	Not Interesting
18017	g1879	NA	-0.600766	-1.1019	Not Interesting
18036	g1882	sp|Q99L88|SNTB1_MOUSE	0.495419	0.471421	Not Interesting
18157	g13899	sp|C6KSQ6|RAD50_PLAF7	-1.49059	-2.0263	Not Interesting
18175	g13904	NA	0.687362	0.557406	Not Interesting
18176	g13904	NA	0.858284	0.86788	Not Interesting
18193	g13907	sp|O88866|HUNK_MOUSE	0.580685	0.595136	Not Interesting
18197	g13907	sp|O88866|HUNK_MOUSE	-0.525039	-0.0887022	Not Interesting
18219	g13917	NA	1.2884	2.17913	Not Interesting
18220	g13917	NA	1.25909	2.03527	Not Interesting
18336	g56	sp|Q9H306|MMP27_HUMAN	1.32028	2.48185	Not Interesting
18345	g33236	NA	0.410871	0.653445	Not Interesting
18359	g33238	NA	-0.49354	-0.929255	Not Interesting
18375	g33239	sp|F1MCA7|LRRC7_BOVIN	-0.888592	-0.413374	Not Interesting
18382	g33242	NA	1.70009	1.82933	Not Interesting
18390	g33243	sp|P21328|RTJK_DROME	-0.313934	-0.783578	Not Interesting
18409	g33253	sp|Q9Z1P7|KANK3_MOUSE	0.0615873	0.569087	Not Interesting
18477	g20330	NA	-0.358384	-0.701961	Not Interesting
18614	g11745	sp|Q90623|MYPT1_CHICK	-0.681332	0.12951	Not Interesting
18664	g11755	NA	-0.226061	-0.816659	Not Interesting
18694	g11761	sp|Q9JHX4|CASP8_RAT	-0.433283	-0.584019	Not Interesting
18729	g1692	sp|Q56R14|TRI33_XENLA	-1.01437	-0.570676	Not Interesting
18738	g1696	sp|O95490|AGRL2_HUMAN	-0.459894	-0.967855	Not Interesting
18802	g33728	sp|Q01433|AMPD2_HUMAN	-0.804668	-0.789146	Not Interesting
18821	g33731	sp|P70566|TMOD2_RAT	-0.986446	-1.37928	Not Interesting
18827	g33731	sp|P70566|TMOD2_RAT	-1.2451	-1.21684	Not Interesting
18938	g20571	sp|A7SXK3|TMED_NEMVE	-0.657384	-0.804417	Not Interesting
190	g18915	sp|Q6TLH3|CUED2_DANRE	0.532628	0.922427	Not Interesting
19071	g14267	sp|Q921D9|GRHL1_MOUSE	-1.20057	-1.81523	Not Interesting
19074	g14267	sp|Q921D9|GRHL1_MOUSE	0.665446	0.489234	Not Interesting
19163	g9901	sp|Q95SX7|RTBS_DROME	-0.479974	-0.851207	Not Interesting
1934	g28526	sp|Q60855|RIPK1_MOUSE	-0.193891	-0.480241	Not Interesting
19368	g12039	sp|Q505D9|TRI67_MOUSE	0.446746	0.771228	Not Interesting
19378	g12040	NA	0.479102	0.546944	Not Interesting
19379	g12041	NA	-0.494301	1.31381	Head
19383	g12042	NA	0.51384	1.32377	Not Interesting
19404	g12048	sp|P62282|RS11_RAT	0.497901	0.135351	Not Interesting
19415	g12055	NA	-1.05766	-0.638993	Not Interesting
19416	g12055	NA	-1.19367	-1.31778	Not Interesting
19500	g9565	sp|Q27746|DNMT1_PARLI	-0.897807	0.365579	Head
19501	g9565	sp|Q27746|DNMT1_PARLI	0.0315426	0.772506	Not Interesting
19502	g9565	sp|Q27746|DNMT1_PARLI	1.52349	3.34194	Not Interesting
19538	g9572	sp|P26436|ASPX_HUMAN	1.25957	1.44994	Not Interesting
19598	g8541	sp|Q9QZD5|RAE2_MOUSE	0.512126	0.385159	Not Interesting
19611	g8550	sp|Q9UHC3|ASIC3_HUMAN	-0.752371	-1.02961	Not Interesting
1967	g13488	NA	0.35792	0.782681	Not Interesting
19694	g8574	NA	-0.380844	-0.779823	Not Interesting
19760	g8603	sp|Q6ZR37|PKHG7_HUMAN	0.558185	0.700405	Not Interesting
19777	g8603	sp|Q6ZR37|PKHG7_HUMAN	1.09385	0.856524	Not Interesting
19785	g8604	sp|Q58D06|WDR74_BOVIN	0.470748	0.38638	Not Interesting
19824	g8608	NA	-0.983347	-0.996793	Not Interesting
19838	g8611	NA	0.651221	0.830991	Not Interesting
19904	g32582	sp|Q1W617|SHRM4_MOUSE	-0.706952	-1.2907	Not Interesting
19919	g32585	sp|Q9Z125|CR3L1_MOUSE	0.481265	0.942827	Not Interesting
19958	g15773	NA	0.393478	0.634849	Not Interesting
19959	g15773	NA	0.460678	0.87768	Not Interesting
19960	g15773	NA	-1.27939	-0.542274	Not Interesting
19970	g15774	sp|P51577|P2RX4_RAT	0.165523	0.418584	Not Interesting
19971	g15774	sp|P51577|P2RX4_RAT	0.383515	1.47146	Not Interesting
2	g5776	sp|Q82P90|IABF_STRAW	0.0385951	0.811475	Not Interesting
20014	g15789	sp|P22182|FGFR1_XENLA	1.33182	0.724977	Not Interesting
20023	g15793	NA	-0.280761	-0.93185	Not Interesting
20024	g15793	NA	-0.342885	-0.605914	Not Interesting
20075	g26105	NA	-0.992037	-0.129592	Not Interesting
20086	g26107	sp|Q9BQS2|SYT15_HUMAN	-0.7555	-0.348361	Not Interesting
20089	g26107	sp|Q9BQS2|SYT15_HUMAN	-0.136906	0.608636	Not Interesting
20097	g26111	NA	-0.93733	-0.37175	Not Interesting
201	g18917	sp|Q16827|PTPRO_HUMAN	1.15146	0.782342	Not Interesting
20113	g26120	sp|P98191|CDS1_MOUSE	-0.921486	-0.721866	Not Interesting
20122	g26122	sp|C0HK24|ELEL_ECHLU	-0.494159	-0.35145	Not Interesting
2014	g10564	sp|O00370|LORF2_HUMAN	-1.16862	-0.568119	Not Interesting
20160	NA	NA	0.736632	0.970908	Not Interesting
20180	g2865	NA	-0.915681	-1.15294	Not Interesting
20194	g2869	NA	-0.234017	-0.585149	Not Interesting
20245	NA	NA	-0.0844578	-0.662651	Not Interesting
20259	g18030	NA	-0.951405	-0.742815	Not Interesting
20262	g18032	NA	1.40567	1.28776	Not Interesting
20317	g32017	sp|Q24547|STX1A_DROME	1.04023	1.81268	Not Interesting
20320	g32018	sp|Q24547|STX1A_DROME	0.126795	1.15402	Not Interesting
20346	g13299	sp|Q8CG19|LTBP1_MOUSE	-0.53161	-1.11093	Not Interesting
20386	g5384	NA	0.563114	0.947015	Not Interesting
20424	g5392	NA	-0.881484	-0.910584	Not Interesting
20428	g5392	NA	-0.164531	-0.574667	Not Interesting
20454	g5398	NA	-1.37156	-1.8709	Not Interesting
2048	g16741	NA	0.10164	0.725543	Not Interesting
20494	g65	NA	-1.03913	-1.23377	Not Interesting
20501	g68	sp|O57525|CP17A_RANDY	-0.341642	-0.610276	Not Interesting
20517	g69	sp|O57460|TLL1_DANRE	1.09832	-0.305723	Not Interesting
20521	g69	sp|O57460|TLL1_DANRE	1.05224	0.416531	Not Interesting
2053	g16741	NA	0.292264	0.623533	Not Interesting
20587	g11091	sp|Q92519|TRIB2_HUMAN	-0.452913	-0.664659	Not Interesting
20617	g11095	sp|P97494|GSH1_MOUSE	-0.144534	-0.924127	Not Interesting
20619	g11095	sp|P97494|GSH1_MOUSE	-0.796565	-1.00954	Not Interesting
20657	g25443	NA	-0.640295	-1.48554	Not Interesting
20663	g25448	sp|Q09575|YRD6_CAEEL	0.706303	0.857643	Not Interesting
20669	g25449	NA	0.615832	0.678143	Not Interesting
20681	g25453	NA	0.803207	0.240401	Not Interesting
20725	g25486	NA	0.599771	0.67202	Not Interesting
20778	g25501	NA	2.24414	2.06892	Not Interesting
21081	g16881	NA	0.859529	1.44134	Not Interesting
21082	g16881	NA	1.14106	1.44914	Not Interesting
21083	g16881	NA	0.668997	1.15054	Not Interesting
21085	g16881	NA	1.08427	1.13291	Not Interesting
21086	g16882	NA	2.14752	2.82129	Not Interesting
21141	g16906	sp|B3EWZ6|MLRP2_ACRMI	-0.00824591	0.697803	Not Interesting
21161	g16907	sp|B3EWZ6|MLRP2_ACRMI	-1.14752	-0.838531	Not Interesting
21191	g10729	NA	-0.839423	-1.10261	Not Interesting
21201	g21979	sp|Q6EE22|UNK_CANLF	-0.495358	-0.897494	Not Interesting
21257	g21991	sp|Q3T075|STX8_BOVIN	0.546148	0.89679	Not Interesting
21262	g21993	sp|P24733|MYS_ARGIR	0.927871	1.8883	Not Interesting
21264	g21993	sp|P24733|MYS_ARGIR	0.394112	0.862569	Not Interesting
21358	g13799	NA	-1.03676	-0.706323	Not Interesting
21359	g13799	NA	-1.78417	-1.34945	Not Interesting
21360	g13799	NA	-0.966498	-0.794539	Not Interesting
21388	g13803	sp|Q6ING7|FLAD1_XENLA	-0.668129	0.473631	Head
21454	g4068	sp|P57103|NAC3_HUMAN	-0.559582	-1.14465	Not Interesting
21459	g4073	sp|P48766|NAC1_CAVPO	-0.740369	-0.753508	Not Interesting
2147	g30824	sp|Q08DK7|MCATL_BOVIN	0.675101	1.30073	Not Interesting
21504	g4084	sp|Q9QZC7|PKHB2_MOUSE	0.846371	0.614711	Not Interesting
2155	g30824	sp|Q08DK7|MCATL_BOVIN	-0.640205	-0.323091	Not Interesting
2157	g30824	sp|Q08DK7|MCATL_BOVIN	-0.618577	-0.216055	Not Interesting
21571	g4114	NA	0.32124	0.843621	Not Interesting
21579	g4115	sp|Q90Y57|JAG1A_DANRE	-0.644805	-0.64182	Not Interesting
21605	g23620	sp|P61315|G3ST3_MOUSE	-0.72346	-0.395426	Not Interesting
21672	g8887	NA	-0.659953	-0.920033	Not Interesting
21690	NA	NA	-1.11961	-1.5838	Not Interesting
21709	g12803	NA	-0.30093	-0.882459	Not Interesting
21710	g12804	NA	-0.399512	-0.692619	Not Interesting
21736	g14016	NA	0.368606	0.796993	Not Interesting
21744	g14017	NA	0.320239	0.860821	Not Interesting
21747	g14018	sp|Q15063|POSTN_HUMAN	-1.41769	-0.674021	Not Interesting
21749	g14018	sp|Q15063|POSTN_HUMAN	-0.0813946	-0.726509	Not Interesting
21750	g14018	sp|Q15063|POSTN_HUMAN	-0.565247	-0.911684	Not Interesting
21761	g14025	sp|P60670|NPL4_MOUSE	-0.827748	-1.30038	Not Interesting
21780	g14034	NA	0.218766	0.505701	Not Interesting
21820	g21930	sp|Q4R3D6|ZMYM5_MACFA	-0.867433	-1.16878	Not Interesting
21898	g7738	NA	0.0599108	1.11453	Head
2190	g30832	sp|Q3TPX4|EXOC5_MOUSE	0.287966	0.576418	Not Interesting
21907	g7740	sp|Q1ZZH1|GRM3_MACFA	-0.878584	-0.807466	Not Interesting
21935	g10585	sp|Q8IZJ1|UNC5B_HUMAN	0.683969	0.521312	Not Interesting
21953	g10587	NA	0.535711	0.264456	Not Interesting
21960	g10588	sp|Q9V785|3BP5H_DROME	0.945238	0.617625	Not Interesting
21996	g10593	sp|Q6AZB8|HARB1_DANRE	0.772216	0.702062	Not Interesting
21999	g10594	sp|O35426|XBP1_MOUSE	0.735633	0.859125	Not Interesting
22016	g10596	NA	-0.240525	-0.637723	Not Interesting
22033	g10604	sp|P49715|CEBPA_HUMAN	-0.676648	-0.986578	Not Interesting
22108	g7856	NA	0.339257	0.479408	Not Interesting
22138	g7862	NA	0.359527	0.7817	Not Interesting
22171	g7872	sp|Q8R4V5|OIT3_MOUSE	0.703442	0.922625	Not Interesting
222	g18922	sp|P97739|ECE1_CAVPO	-1.23158	-0.874482	Not Interesting
22226	g1266	sp|O16025|AOSL_PLEHO	-1.04619	-0.640012	Not Interesting
22253	g8452	NA	-0.557036	-0.85666	Not Interesting
22266	g8457	sp|Q6I6G8|HECW2_MOUSE	0.318248	0.436827	Not Interesting
22414	g8497	sp|O42350|CO1A2_LITCT	1.25781	0.626318	Not Interesting
22428	g8503	NA	-0.0452733	-0.900855	Not Interesting
22459	g8511	sp|Q1LZ71|LFG2_BOVIN	0.97426	1.13989	Not Interesting
22564	g25546	NA	-0.169103	-0.796003	Not Interesting
22579	g25554	sp|O60291|MGRN1_HUMAN	-0.338559	-0.923001	Not Interesting
2259	g308	sp|O00222|GRM8_HUMAN	-0.37659	-0.88054	Not Interesting
22592	g25556	sp|A7E2S9|A30BL_HUMAN	0.333709	1.39792	Not Interesting
22597	g25557	sp|Q9H1Y3|OPN3_HUMAN	-1.00436	-1.26439	Not Interesting
2260	g308	sp|O00222|GRM8_HUMAN	-1.02011	-1.40172	Not Interesting
22619	g25565	sp|Q8AVY1|ODF3A_XENLA	-0.676828	-1.22815	Not Interesting
22620	g25565	sp|Q8AVY1|ODF3A_XENLA	-0.629578	-0.797793	Not Interesting
22700	g25581	sp|Q2KJG3|SYNC_BOVIN	0.73316	1.03951	Not Interesting
22711	g25581	sp|Q2KJG3|SYNC_BOVIN	0.303602	0.471207	Not Interesting
22774	g12915	sp|O45818|DKF2_CAEEL	-0.748965	-1.13721	Not Interesting
22786	g12918	NA	0.601901	0.267172	Not Interesting
22797	g12926	NA	-1.13165	-1.44826	Not Interesting
228	g18923	NA	-0.235981	-0.646108	Not Interesting
22920	g12951	NA	0.970813	0.868118	Not Interesting
22921	g12951	NA	0.445312	0.976851	Not Interesting
22938	g12966	NA	-0.20785	0.613952	Not Interesting
22975	g21184	NA	-0.434376	-0.909345	Not Interesting
22984	g5147	NA	-0.655206	-0.18334	Not Interesting
22998	g5150	sp|Q12802|AKP13_HUMAN	0.0160416	0.775025	Not Interesting
22999	g5150	sp|Q12802|AKP13_HUMAN	-0.275565	0.766012	Not Interesting
23018	g5153	sp|Q6ZSZ5|ARHGI_HUMAN	-1.32069	-0.714275	Not Interesting
231	g18923	NA	0.189188	-0.7084	Not Interesting
23157	g23847	sp|Q2KN96|CYTSA_XENTR	-0.930763	-0.992218	Not Interesting
23173	g23852	sp|Q8N6T3|ARFG1_HUMAN	0.941534	0.959526	Not Interesting
23182	g23855	sp|P25778|ORYC_ORYSJ	-0.330587	-0.758338	Not Interesting
23204	g23866	sp|P17713|STK_HYDVU	-0.42669	-0.685309	Not Interesting
2321	g322	NA	-0.435185	-0.662905	Not Interesting
23221	g23869	NA	-0.543321	-1.00853	Not Interesting
23231	g23869	NA	-0.270652	-0.669695	Not Interesting
23237	g23869	NA	-0.847535	-1.19969	Not Interesting
23279	g17928	NA	-1.74143	-0.346135	Head
23290	g17928	NA	-0.701087	-0.934122	Not Interesting
23301	g25309	NA	0.74618	0.463585	Not Interesting
23320	g30657	sp|Q32KX5|LRC28_BOVIN	0.503995	0.844081	Not Interesting
23366	g30670	sp|Q9QUP4|CHST5_MOUSE	-0.443733	-0.732239	Not Interesting
23367	g30671	sp|J3S6Y1|TSEAR_MOUSE	-0.372426	-0.872548	Not Interesting
23372	g30671	sp|J3S6Y1|TSEAR_MOUSE	-1.07449	-1.61423	Not Interesting
23434	g17463	sp|P51476|OPSP_COLLI	-1.03243	0.0473603	Not Interesting
23577	g20728	sp|P22897|MRC1_HUMAN	-0.659624	-0.894433	Not Interesting
23592	g20735	sp|P35546|RET_MOUSE	-0.704905	-1.24846	Not Interesting
23623	g13740	NA	-0.209552	-0.613347	Not Interesting
23649	g28429	NA	0.10698	1.67327	Head
23650	g28429	NA	0.288546	0.874213	Not Interesting
23651	g28429	NA	0.113107	1.17672	Not Interesting
23657	g28430	NA	-0.556026	1.02676	Head
23660	g28430	NA	0.577242	1.22578	Not Interesting
23661	g28430	NA	0.197143	0.515565	Not Interesting
23801	g9992	NA	0.612611	0.908571	Not Interesting
23804	g9992	NA	0.618441	0.887045	Not Interesting
23809	g9993	NA	0.364632	1.5989	Not Interesting
23810	g9993	NA	-0.904647	0.353036	Head
23813	g9994	sp|Q2W2L2|RS11_MAGSA	-1.0205	-0.783012	Not Interesting
23814	g9994	sp|Q2W2L2|RS11_MAGSA	-1.02653	0.902318	Head
23816	g9994	sp|Q2W2L2|RS11_MAGSA	-2.03139	1.30122	Head
23822	g9994	sp|Q2W2L2|RS11_MAGSA	-0.636826	-0.419242	Not Interesting
23843	g10006	NA	0.312165	0.439347	Not Interesting
2387	g334	sp|Q9BUZ4|TRAF4_HUMAN	-0.746714	-1.11873	Not Interesting
23879	g10018	sp|Q4I963|COFI_GIBZE	-0.383644	-0.654477	Not Interesting
2388	g334	sp|Q9BUZ4|TRAF4_HUMAN	-0.52059	-0.814249	Not Interesting
23905	g10027	sp|P0C6Y7|PRDM9_RAT	-0.749446	-1.18679	Not Interesting
23930	g10033	NA	-0.259582	-0.505399	Not Interesting
23932	g10034	sp|P08419|CEL2A_PIG	1.28825	1.67577	Not Interesting
23933	g10034	sp|P08419|CEL2A_PIG	1.17411	1.49393	Not Interesting
23935	g10034	sp|P08419|CEL2A_PIG	0.91932	1.30555	Not Interesting
23951	g10041	sp|Q90YM8|CYFP1_DANRE	-0.4055	-0.92943	Not Interesting
23963	g10045	sp|P61765|STXB1_RAT	0.63787	1.03012	Not Interesting
23981	g10049	NA	0.57237	0.565044	Not Interesting
24035	g10056	sp|P0CJ14|VP302_LYCMC	0.906086	1.59577	Not Interesting
24047	g10067	NA	-0.356807	-0.837831	Not Interesting
24050	g10067	NA	-0.739465	-0.969416	Not Interesting
24053	g10069	NA	0.489299	0.845525	Not Interesting
24084	g10084	sp|P27448|MARK3_HUMAN	0.932007	1.10463	Not Interesting
24086	g10084	sp|P27448|MARK3_HUMAN	-0.429965	-0.717738	Not Interesting
24129	g10094	NA	0.508149	0.769821	Not Interesting
24154	g10106	sp|Q96PZ7|CSMD1_HUMAN	-0.432583	-0.80963	Not Interesting
2417	g343	sp|P31696|AGRIN_CHICK	0.401018	0.654886	Not Interesting
24202	g3240	sp|Q5UPE2|YL063_MIMIV	0.858641	1.09113	Not Interesting
24255	g33693	sp|P18428|LBP_HUMAN	-0.436456	-1.33639	Not Interesting
24323	g33712	NA	-0.689514	-1.06768	Not Interesting
24352	g33718	sp|Q9D361|SNR48_MOUSE	1.31402	1.65624	Not Interesting
24363	g33720	NA	1.1685	1.42754	Not Interesting
24395	g31978	sp|Q9VUW9|HIP14_DROME	-0.471968	-0.432124	Not Interesting
24401	g31981	sp|Q80TN5|ZDH17_MOUSE	0.438237	0.663728	Not Interesting
24409	g31982	sp|Q9YHD3|BAG6A_XENLA	1.08456	2.04186	Not Interesting
24501	g21462	NA	-1.4302	-0.458661	Not Interesting
2451	g370	sp|Q68US5|EVA1C_PANTR	-0.245528	-1.00809	Not Interesting
24524	g21466	NA	-0.994984	-0.953727	Not Interesting
2462	g371	sp|Q9GM70|ST17A_RABIT	-0.167351	-0.806707	Not Interesting
24621	g4288	sp|A7RRG3|AKTIP_NEMVE	0.240972	0.994067	Not Interesting
24627	g4292	NA	-0.245662	0.479038	Not Interesting
24666	g11184	sp|Q9UBH6|XPR1_HUMAN	-1.44757	-1.61266	Not Interesting
24673	g11186	NA	-0.937654	-0.10281	Not Interesting
24675	g11186	NA	-1.02796	0.374708	Not Interesting
24712	g11204	sp|Q54TR1|CFAD_DICDI	-0.25116	-0.60769	Not Interesting
2472	g374	NA	-0.624007	-0.548696	Not Interesting
24772	g11219	sp|Q6NWD4|TIM50_DANRE	0.520184	0.612938	Not Interesting
24791	g29101	sp|P79282|FUT8_PIG	-0.664482	-0.548914	Not Interesting
24807	g29105	sp|Q5U3U0|PHYD1_DANRE	-0.522963	-0.950743	Not Interesting
24879	g29129	NA	0.727382	1.55666	Not Interesting
24907	g29131	NA	0.466126	0.252615	Not Interesting
24911	g29131	NA	1.56116	1.4861	Not Interesting
25009	g29153	sp|Q99LZ3|SLD5_MOUSE	-0.291708	-0.852347	Not Interesting
2508	g387	sp|Q9VXN0|GTDC1_DROME	0.517377	0.846598	Not Interesting
25133	g15814	NA	-1.24623	-1.2495	Not Interesting
25187	g15826	sp|Q16659|MK06_HUMAN	-0.434184	-0.856288	Not Interesting
25191	g15826	sp|Q16659|MK06_HUMAN	-0.641181	-1.04261	Not Interesting
25194	g15826	sp|Q16659|MK06_HUMAN	-0.577567	-0.958665	Not Interesting
25195	g15827	NA	-1.04941	0.218479	Not Interesting
25294	g15864	sp|G2K3G6|INLA_LISM4	-0.867059	-1.46795	Not Interesting
25308	g15875	NA	0.120312	0.730723	Not Interesting
2533	g389	sp|Q5FVN8|WSDU1_RAT	1.14944	0.956813	Not Interesting
25333	g15881	sp|Q06725|N2F1A_DANRE	-0.815252	-1.01287	Not Interesting
25339	g15882	sp|Q9Z1N9|UN13B_MOUSE	-0.879735	-0.770038	Not Interesting
25369	g15884	NA	0.424577	0.88122	Not Interesting
25390	g15894	sp|B5ZYI7|DUT_RHILW	0.975329	0.644904	Not Interesting
25409	g15898	NA	0.653835	0.792726	Not Interesting
25416	g15899	sp|Q9W6A8|OP1S2_DANRE	0.989739	0.683468	Not Interesting
25427	g15903	sp|P21329|RTJK_DROFU	1.02966	0.700986	Not Interesting
25428	g15903	sp|P21329|RTJK_DROFU	0.547735	0.409839	Not Interesting
25442	g15906	sp|P13804|ETFA_HUMAN	-0.64186	-0.0153822	Not Interesting
25443	g15906	sp|P13804|ETFA_HUMAN	0.933155	0.69936	Not Interesting
25444	g15907	sp|O43581|SYT7_HUMAN	0.506254	0.162437	Not Interesting
25445	g15907	sp|O43581|SYT7_HUMAN	1.39401	-0.22159	Foot
25446	g15907	sp|O43581|SYT7_HUMAN	0.885768	0.355327	Not Interesting
25553	NA	NA	0.353392	0.784576	Not Interesting
25594	g30805	NA	0.349874	0.779604	Not Interesting
25625	g31477	sp|P17972|KCNAW_DROME	-0.467184	-0.99868	Not Interesting
25630	g31478	NA	0.564206	0.916388	Not Interesting
25671	g6061	sp|P09330|PRPS2_RAT	-1.09691	-1.50326	Not Interesting
25736	g1567	sp|P06731|CEAM5_HUMAN	0.504638	0.166518	Not Interesting
2575	g15000	sp|Q6IYF9|SUCR1_RAT	0.636194	0.499011	Not Interesting
25769	g1591	sp|Q01973|ROR1_HUMAN	-1.08971	-0.296727	Not Interesting
25772	g1591	sp|Q01973|ROR1_HUMAN	-0.0916652	0.948431	Not Interesting
25773	g1591	sp|Q01973|ROR1_HUMAN	0.735032	0.914349	Not Interesting
25828	g1599	sp|Q5PR73|DIRA2_MOUSE	0.0457722	-0.450088	Not Interesting
25834	g1601	NA	-0.57029	-0.798303	Not Interesting
25947	g1622	NA	-0.578479	-1.09011	Not Interesting
25959	g1624	sp|Q61115|PTC1_MOUSE	0.372812	0.976304	Not Interesting
25962	g1624	sp|Q61115|PTC1_MOUSE	1.10088	1.51702	Not Interesting
25979	g1627	sp|Q4ADK4|CFDP1_MUNRE	-1.39077	-0.539299	Not Interesting
25983	g1627	sp|Q4ADK4|CFDP1_MUNRE	-0.11569	-0.681789	Not Interesting
2600	g15013	sp|Q9CQ33|LZTR1_MOUSE	-0.729832	-0.144434	Not Interesting
26047	g23177	sp|P70255|NFIC_MOUSE	-0.763423	-0.501272	Not Interesting
26052	g23177	sp|P70255|NFIC_MOUSE	1.64894	1.60241	Not Interesting
2608	g15015	sp|P22757|HE_PARLI	1.26595	1.15593	Not Interesting
26128	g27512	NA	0.351476	0.487136	Not Interesting
26134	g27513	NA	-1.07863	0.443613	Head
26137	g27513	NA	-0.705503	2.26013	Head
26138	g27513	NA	-0.72901	1.3271	Not Interesting
26145	g27514	NA	0.443919	0.179063	Not Interesting
26171	g32977	NA	-0.349657	-0.812549	Not Interesting
26187	g32980	NA	1.14606	1.33844	Not Interesting
26192	g32982	sp|Q5R6T1|PDIA6_PONAB	0.861586	1.071	Not Interesting
26206	g32985	NA	-1.13222	-1.30998	Not Interesting
26208	g32985	NA	-0.235855	-0.647347	Not Interesting
26239	g32990	NA	0.406702	0.42329	Not Interesting
2625	g15023	sp|O75146|HIP1R_HUMAN	0.743881	1.21455	Not Interesting
26251	g32992	NA	-0.789816	-1.05474	Not Interesting
26265	g32996	sp|Q8WP23|BOLL_MACFA	0.0946694	1.11879	Not Interesting
26275	g33001	sp|A1A4J1|PFKAL_BOVIN	-0.383613	-0.798778	Not Interesting
2629	g15023	sp|O75146|HIP1R_HUMAN	0.394256	0.577211	Not Interesting
26318	g33020	NA	-0.550422	-0.675542	Not Interesting
26367	g25396	NA	0.672788	0.725087	Not Interesting
26411	g11780	sp|Q62445|SP4_MOUSE	0.374319	-0.0747778	Not Interesting
2642	g15025	sp|O75146|HIP1R_HUMAN	-0.455982	-0.694463	Not Interesting
26459	g11799	sp|O73606|KCNG2_CHICK	1.09319	0.857681	Not Interesting
26474	g11799	sp|O73606|KCNG2_CHICK	-0.456	-0.94517	Not Interesting
26493	g11804	NA	-0.129647	-0.536652	Not Interesting
26506	g11810	sp|Q8R3S2|TSN33_MOUSE	-0.636403	-0.353015	Not Interesting
26602	g11860	NA	-0.441043	-0.804805	Not Interesting
26654	g11874	NA	0.185434	0.989138	Not Interesting
26728	g1274	NA	0.266632	0.722141	Not Interesting
26733	g1275	sp|P27918|PROP_HUMAN	-1.4116	-0.438815	Not Interesting
26767	g1276	sp|Q96RW7|HMCN1_HUMAN	0.212998	-0.714075	Foot
26770	g1278	NA	-0.272981	-0.736666	Not Interesting
26805	g6370	NA	-0.677821	0.0252112	Not Interesting
26812	g6371	NA	0.443811	0.887741	Not Interesting
26813	g6372	sp|Q8BT14|CNOT4_MOUSE	0.835863	0.646915	Not Interesting
26862	g6387	sp|P08183|MDR1_HUMAN	0.897118	2.0025	Not Interesting
26876	g6387	sp|P08183|MDR1_HUMAN	0.411393	0.821968	Not Interesting
26893	g31517	sp|Q96RW7|HMCN1_HUMAN	-0.722293	-0.880689	Not Interesting
269	g18934	sp|P42892|ECE1_HUMAN	-0.0563905	0.559327	Not Interesting
26900	g31517	sp|Q96RW7|HMCN1_HUMAN	-0.593045	-0.935545	Not Interesting
2695	g15047	NA	-0.402575	-0.68818	Not Interesting
27010	g8539	NA	-0.599509	-0.512361	Not Interesting
27055	g19641	NA	-0.179332	-0.677163	Not Interesting
27058	g19642	sp|Q5SVZ6|ZMYM1_HUMAN	1.02587	1.5222	Not Interesting
27102	g23963	NA	0.520901	0.0527451	Not Interesting
2724	g15053	NA	-0.726351	-0.389012	Not Interesting
2725	g15053	NA	-0.556601	-0.872495	Not Interesting
27255	g26294	sp|Q9H0J9|PAR12_HUMAN	0.431102	0.818201	Not Interesting
27282	g26307	NA	-0.622791	-0.631996	Not Interesting
27303	g20582	sp|Q9U943|APLP_LOCMI	0.652273	0.816352	Not Interesting
27379	g9411	sp|Q15024|EXOS7_HUMAN	-0.659895	0.012469	Not Interesting
27445	g6116	sp|Q8WX94|NALP7_HUMAN	-0.874964	-0.948146	Not Interesting
2749	g7609	sp|Q95029|CATL_DROME	0.414566	0.639298	Not Interesting
27494	g6131	sp|O73853|CP17A_ICTPU	2.54447	2.81669	Not Interesting
27495	g6131	sp|O73853|CP17A_ICTPU	1.1949	1.38364	Not Interesting
27497	g6131	sp|O73853|CP17A_ICTPU	1.1896	1.27878	Not Interesting
27498	g6131	sp|O73853|CP17A_ICTPU	0.172818	0.91572	Not Interesting
27499	g6131	sp|O73853|CP17A_ICTPU	0.450198	1.41481	Not Interesting
2750	g7609	sp|Q95029|CATL_DROME	0.547825	0.833803	Not Interesting
27522	g6134	sp|Q7LHG5|YI31B_YEAST	-1.98618	-0.698214	Not Interesting
27525	g6134	sp|Q7LHG5|YI31B_YEAST	-0.230394	-0.70318	Not Interesting
27541	g6138	NA	1.37466	1.63072	Not Interesting
27550	g6139	sp|Q03350|TSP2_MOUSE	0.482134	0.225342	Not Interesting
27557	g6141	sp|Q4UMH6|Y381_RICFE	-0.17057	-0.929669	Not Interesting
27566	g6143	NA	0.913814	0.651262	Not Interesting
27571	g6144	sp|Q80VI1|TRI56_MOUSE	0.492239	0.989762	Not Interesting
27584	g6146	sp|Q0V8J4|VWA7_BOVIN	0.532818	0.450698	Not Interesting
27613	g6163	NA	-0.741043	-1.03945	Not Interesting
27614	g6164	sp|Q9UHC6|CNTP2_HUMAN	-0.698592	-0.122159	Not Interesting
27616	g6164	sp|Q9UHC6|CNTP2_HUMAN	-1.09735	-0.458289	Not Interesting
27617	g6164	sp|Q9UHC6|CNTP2_HUMAN	-1.91856	-0.609691	Head
27632	g6168	sp|P49263|PXN1_XENLA	-0.511976	-0.662594	Not Interesting
27635	g6168	sp|P49263|PXN1_XENLA	-0.849058	-0.0273874	Not Interesting
27658	g6172	sp|P0DOC8|CH037_DANRE	0.228074	0.81397	Not Interesting
27672	g6175	NA	-0.5398	-0.792586	Not Interesting
27676	g6176	NA	0.785425	0.825245	Not Interesting
27678	g6176	NA	-0.284233	-0.748253	Not Interesting
27697	g6178	sp|Q9UJ78|ZMYM5_HUMAN	-0.428385	-0.99538	Not Interesting
27712	g6180	sp|Q8IVS2|FABD_HUMAN	-0.378867	-0.785305	Not Interesting
27865	g6706	NA	-0.0439671	-0.647287	Not Interesting
27866	g6706	NA	-0.299617	-0.699634	Not Interesting
27876	g6707	sp|Q9UGT4|SUSD2_HUMAN	1.26027	1.90469	Not Interesting
27898	g10615	sp|Q10574|LIN32_CAEEL	-0.386692	-1.00328	Not Interesting
2790	g7631	sp|Q8WXF0|SRS12_HUMAN	-0.588606	-0.326805	Not Interesting
27945	g10637	sp|Q766D5|B4GN4_MOUSE	-0.351462	-0.716082	Not Interesting
27963	g10648	sp|Q5R7P4|BGAL_PONAB	0.316832	0.91133	Not Interesting
27983	g10650	sp|Q7LL04|YQK1_SCHPO	0.318411	1.1144	Not Interesting
28008	g10655	NA	-0.68466	-0.65083	Not Interesting
2802	g7634	sp|Q08AW4|PKHM3_XENLA	0.994471	1.77392	Not Interesting
28063	g10680	sp|H2A0N9|KCP4_PINMG	1.09664	1.90119	Not Interesting
28064	g10680	sp|H2A0N9|KCP4_PINMG	1.24787	1.89273	Not Interesting
28065	g10680	sp|H2A0N9|KCP4_PINMG	0.626511	0.929902	Not Interesting
28066	g10680	sp|H2A0N9|KCP4_PINMG	1.19684	1.66695	Not Interesting
28212	g33566	sp|P41743|KPCI_HUMAN	0.644515	1.34181	Not Interesting
28237	g33575	NA	0.481504	0.96642	Not Interesting
28240	g33575	NA	0.676678	1.13866	Not Interesting
28254	g33581	NA	1.66916	2.5911	Not Interesting
28255	g33581	NA	0.833802	1.19101	Not Interesting
28262	g33582	NA	0.644999	0.874117	Not Interesting
28264	g33584	sp|Q86YV6|MYLK4_HUMAN	0.934551	0.729516	Not Interesting
28348	g7810	sp|Q9I830|KCNA2_ONCMY	-0.766188	-0.864436	Not Interesting
28354	g7810	sp|Q9I830|KCNA2_ONCMY	-0.418571	-0.511329	Not Interesting
28399	g7820	sp|Q8CHL0|FZD5_RAT	-0.412908	-0.535464	Not Interesting
2840	g7646	NA	0.13635	0.536972	Not Interesting
28416	g7827	sp|Q95SX7|RTBS_DROME	-0.600207	-0.779443	Not Interesting
28421	g7829	sp|Q6AX60|PTHB1_XENLA	-0.749512	-1.14086	Not Interesting
28422	g7829	sp|Q6AX60|PTHB1_XENLA	-0.638967	-1.35935	Not Interesting
28428	g7832	sp|O95267|GRP1_HUMAN	0.526137	1.18255	Not Interesting
28429	g7832	sp|O95267|GRP1_HUMAN	0.664115	1.02221	Not Interesting
28464	g7841	NA	-0.154783	-0.497487	Not Interesting
2848	g7646	NA	-0.681115	0.0980708	Not Interesting
28487	g22851	NA	0.828586	0.618549	Not Interesting
28505	g22859	sp|B2RX14|TUT4_MOUSE	-0.332084	-0.744566	Not Interesting
28512	g22862	sp|Q5XI28|RAVR1_RAT	0.555557	1.20014	Not Interesting
28514	g22862	sp|Q5XI28|RAVR1_RAT	-0.439202	-0.708435	Not Interesting
2853	g7647	NA	0.754665	1.04645	Not Interesting
28531	g22869	NA	0.196533	0.561357	Not Interesting
28538	g22870	sp|P07314|GGT1_RAT	0.666411	0.380767	Not Interesting
28545	g22872	NA	0.601794	0.8628	Not Interesting
2855	g7648	NA	-1.02307	-0.308011	Not Interesting
28567	g22877	NA	-1.04084	-0.641856	Not Interesting
2861	g7650	NA	0.991261	0.889681	Not Interesting
28713	g11659	sp|Q9NQG7|HPS4_HUMAN	0.265248	0.724132	Not Interesting
2875	g7652	sp|Q52KG5|KI26A_MOUSE	-0.930634	-0.286606	Not Interesting
2876	g7652	sp|Q52KG5|KI26A_MOUSE	-0.65739	-0.690034	Not Interesting
28779	g11692	sp|Q9JJC6|RIPL1_MOUSE	0.289612	0.527551	Not Interesting
2878	g7652	sp|Q52KG5|KI26A_MOUSE	-0.41433	0.886809	Head
28783	g11694	sp|P39921|TPM1_HYDVU	0.452506	0.90568	Not Interesting
28788	g11696	sp|P39921|TPM1_HYDVU	-0.497999	-0.463394	Not Interesting
28789	g11696	sp|P39921|TPM1_HYDVU	-1.18028	-0.794435	Not Interesting
2879	g7652	sp|Q52KG5|KI26A_MOUSE	-0.847568	-0.658438	Not Interesting
28796	g11697	sp|P55112|NAS4_CAEEL	0.71541	0.720924	Not Interesting
28802	g11698	sp|P55112|NAS4_CAEEL	0.29185	1.06374	Not Interesting
28823	g11710	NA	0.259618	1.48387	Not Interesting
2884	g7652	sp|Q52KG5|KI26A_MOUSE	1.10917	0.0488076	Not Interesting
28858	g25247	sp|P18915|CAH6_BOVIN	-1.09327	-0.874433	Not Interesting
2889	g7653	NA	0.533326	0.634148	Not Interesting
28900	g25257	NA	-0.295526	-0.865845	Not Interesting
28905	g25259	sp|Q9VCA2|ORCT_DROME	-0.961536	-1.20677	Not Interesting
28945	g16603	NA	-0.596654	-1.19842	Not Interesting
28967	g16616	NA	0.767216	0.747194	Not Interesting
28999	g16624	NA	0.543285	0.331979	Not Interesting
29010	g16628	sp|P54846|NRL_MOUSE	-0.844596	-0.989373	Not Interesting
29029	g16633	sp|B0BNA9|CNO11_RAT	-0.58327	-0.0955904	Not Interesting
29037	g16637	NA	-0.276061	-0.742249	Not Interesting
29085	g21311	sp|Q9U539|OCT1_CAEEL	-1.11458	-0.257831	Not Interesting
29217	g26084	sp|Q9Z2X3|PSD10_RAT	-0.629072	0.604935	Head
29278	g16274	sp|P61244|MAX_HUMAN	0.945199	0.846658	Not Interesting
29327	g16288	sp|Q28H35|DAND5_XENTR	-1.01453	0.435833	Not Interesting
29328	g16288	sp|Q28H35|DAND5_XENTR	-1.75355	-1.57184	Not Interesting
29365	g16303	NA	-0.535031	-0.849332	Not Interesting
29366	g16303	NA	-0.930981	-0.170843	Not Interesting
2940	g6721	NA	0.725031	0.535009	Not Interesting
29461	g474	sp|Q3U481|MFS12_MOUSE	0.610149	0.238049	Not Interesting
29482	g21174	sp|P43368|CAN3_PIG	0.547084	0.697538	Not Interesting
29500	g26057	NA	-0.662734	-0.717329	Not Interesting
29568	g9425	sp|P48547|KCNC1_HUMAN	-0.158084	-0.627588	Not Interesting
29614	g14253	sp|Q6GL69|MK67I_XENTR	-1.41487	-1.47171	Not Interesting
29666	g9244	NA	-0.89739	-0.617282	Not Interesting
29743	g2880	NA	-0.884407	-1.5388	Not Interesting
2977	g6732	sp|Q54KA7|SECG_DICDI	-1.47181	-1.30273	Not Interesting
29783	g18860	NA	-0.392228	-1.05559	Not Interesting
2980	g6732	sp|Q54KA7|SECG_DICDI	0.212385	1.29189	Not Interesting
29853	g1967	sp|Q2TA16|CCD65_BOVIN	-0.733687	-1.55156	Not Interesting
29877	g1972	NA	1.9045	2.11248	Not Interesting
29878	g1972	NA	0.538098	0.594032	Not Interesting
2994	g6739	sp|Q925G0|RBM3_RAT	0.73316	1.30169	Not Interesting
29956	g25839	sp|Q9H5L6|THAP9_HUMAN	0.250531	0.67418	Not Interesting
29969	g25842	NA	0.28082	0.702888	Not Interesting
29986	g2061	sp|Q8VHN7|GPR98_MOUSE	-1.17371	-1.0253	Not Interesting
29993	g2062	NA	-1.64147	-0.990595	Not Interesting
30022	g2069	NA	-0.997098	-0.647137	Not Interesting
30074	g28776	sp|Q7TN88|PK1L2_MOUSE	-0.646518	-0.772521	Not Interesting
30119	g28473	sp|Q07075|AMPE_HUMAN	0.749031	0.391262	Not Interesting
30155	g28482	sp|Q8BW72|KDM4A_MOUSE	0.158493	0.628069	Not Interesting
30167	g28490	sp|B5DG67|WDR12_SALSA	-0.340138	-0.601989	Not Interesting
30191	g28498	sp|Q78KK3|S22AI_MOUSE	-0.34512	-0.743971	Not Interesting
3022	g6753	sp|P68372|TBB4B_MOUSE	-0.74085	-0.99414	Not Interesting
30271	g7936	sp|Q91175|ADA1A_ORYLA	-1.17964	-0.822654	Not Interesting
30280	g7938	sp|Q7RTX9|MOT14_HUMAN	-0.388698	-0.807322	Not Interesting
30281	g7938	sp|Q7RTX9|MOT14_HUMAN	-0.868946	-1.16528	Not Interesting
3030	g6754	NA	0.476688	0.695291	Not Interesting
3031	g6754	NA	0.812165	1.14305	Not Interesting
30343	g23129	NA	-1.61835	-0.379406	Not Interesting
30356	g23133	NA	-0.445739	-0.130767	Not Interesting
30367	g23134	sp|Q52KK3|S2551_RAT	0.0292863	-0.586274	Not Interesting
30391	g23140	sp|Q02218|ODO1_HUMAN	0.509677	0.824014	Not Interesting
30417	g23153	sp|P92208|JNK_DROME	-0.815617	-1.12994	Not Interesting
30452	g11467	NA	-0.74481	-0.747056	Not Interesting
30456	g11467	NA	0.436198	0.567748	Not Interesting
30463	g11470	sp|Q96LW9|ZSC31_HUMAN	1.51731	2.41619	Not Interesting
30464	g11470	sp|Q96LW9|ZSC31_HUMAN	0.381067	1.41484	Not Interesting
30466	g11470	sp|Q96LW9|ZSC31_HUMAN	-0.0100869	0.907161	Not Interesting
30467	g11470	sp|Q96LW9|ZSC31_HUMAN	0.59827	1.19881	Not Interesting
30468	g11470	sp|Q96LW9|ZSC31_HUMAN	0.389864	1.62388	Not Interesting
30472	g11470	sp|Q96LW9|ZSC31_HUMAN	0.743003	0.857493	Not Interesting
30585	g30639	sp|Q20191|NAS13_CAEEL	1.02277	0.0277934	Not Interesting
30599	g30641	NA	-0.355669	-0.794961	Not Interesting
30611	g30647	sp|P55115|NAS15_CAEEL	0.691739	0.137083	Not Interesting
3064	g6758	sp|Q91EK3|REP_GOCV	0.937691	0.952107	Not Interesting
30767	g32440	sp|Q4R7L3|PRS6B_MACFA	0.578178	0.220449	Not Interesting
30777	g32443	NA	0.902068	1.0982	Not Interesting
30778	g32443	NA	-0.499132	-1.08852	Not Interesting
30781	g32443	NA	0.47835	0.833439	Not Interesting
30790	g32444	sp|Q6DEL1|S38A7_DANRE	-0.013781	0.962016	Not Interesting
30832	g10850	NA	-0.41053	-0.736222	Not Interesting
30835	g10850	NA	-0.473038	-1.0753	Not Interesting
30942	g21622	NA	-0.88236	-0.532326	Not Interesting
30948	g21622	NA	-0.813274	-0.39267	Not Interesting
30964	g4694	NA	0.659782	0.477255	Not Interesting
30971	g4694	NA	-0.912409	-0.216548	Not Interesting
31061	g29670	sp|Q95M18|ENPL_BOVIN	0.846338	0.924076	Not Interesting
31079	g22086	sp|Q5XGS8|GTPB1_XENLA	0.931055	1.33703	Not Interesting
31090	g22088	sp|D2XV59|GTPB1_RAT	0.357346	1.12956	Not Interesting
31096	g22088	sp|D2XV59|GTPB1_RAT	0.821554	1.47508	Not Interesting
31176	g28118	NA	0.583022	1.31001	Not Interesting
3119	g6825	sp|Q9H0J4|QRIC2_HUMAN	0.43239	0.801982	Not Interesting
31228	g11022	sp|Q9H6U8|ALG9_HUMAN	0.586775	1.07474	Not Interesting
31230	g11022	sp|Q9H6U8|ALG9_HUMAN	0.0182408	1.24389	Head
31276	g11032	NA	-1.40472	-1.24108	Not Interesting
31301	g11037	sp|Q9I8X3|FGFR3_DANRE	-1.28139	-1.76858	Not Interesting
31366	g29167	sp|A0JMY5|NFXL1_XENLA	-0.82996	-0.292132	Not Interesting
31383	g29167	sp|A0JMY5|NFXL1_XENLA	-1.05736	-0.447749	Not Interesting
31411	g29175	NA	0.43417	0.622789	Not Interesting
31415	g29176	sp|Q9VZS6|NSMA_DROME	0.343713	0.68816	Not Interesting
31445	g29182	sp|Q9Z1T5|DEAF1_MOUSE	-0.396738	-0.838615	Not Interesting
31446	g29182	sp|Q9Z1T5|DEAF1_MOUSE	-0.109	-0.970304	Not Interesting
31466	g29199	NA	1.50773	1.57493	Not Interesting
3148	g6838	NA	-0.333656	-0.713352	Not Interesting
31495	g23249	NA	0.510308	0.565498	Not Interesting
31519	g23256	sp|Q8BH31|MFSD8_MOUSE	-0.571084	-0.00796504	Not Interesting
3152	g6839	sp|Q05944|HSP70_HYDVU	0.88074	0.370343	Not Interesting
31520	g23256	sp|Q8BH31|MFSD8_MOUSE	0.00336009	1.00769	Not Interesting
31551	g23268	sp|O94827|PKHG5_HUMAN	-0.305978	-0.791788	Not Interesting
31608	g23281	sp|A7T0W1|UXT_NEMVE	-1.0208	-0.308514	Not Interesting
31624	g23286	NA	-0.852136	-0.190814	Not Interesting
31677	g23296	sp|Q64317|DLX1_MOUSE	-0.301845	-0.579148	Not Interesting
31719	g9034	NA	-0.841196	-0.864623	Not Interesting
31739	g28537	NA	-0.878358	-1.34461	Not Interesting
31861	g28608	sp|Q7Z2H8|S36A1_HUMAN	0.538926	0.482871	Not Interesting
3187	g6849	NA	0.445579	0.581257	Not Interesting
31875	g28610	sp|Q9H1Y3|OPN3_HUMAN	-1.13476	-1.25078	Not Interesting
31907	g28616	sp|Q80VP0|TCPR1_MOUSE	0.18679	1.04968	Not Interesting
31908	g28617	sp|Q86SS6|SYT9_HUMAN	0.464072	1.18909	Not Interesting
31985	g28640	sp|Q9ULT8|HECD1_HUMAN	0.242769	0.769985	Not Interesting
32044	g28648	NA	0.179393	0.600244	Not Interesting
32047	g28651	sp|O00213|APBB1_HUMAN	-1.04803	-0.986858	Not Interesting
32131	g28682	sp|Q95NR9|CALM_METSE	-0.628423	-0.458494	Not Interesting
32133	g28682	sp|Q95NR9|CALM_METSE	0.610629	0.514533	Not Interesting
32136	g28683	NA	-0.635867	-0.193884	Not Interesting
3215	g32638	sp|Q98925|IRF2_CHICK	-0.682819	-0.75374	Not Interesting
32185	g28700	sp|Q9NXK6|MPRG_HUMAN	-0.171319	-0.977662	Not Interesting
32208	g28711	sp|Q3UHC7|DAB2P_MOUSE	-0.848681	-0.0449571	Not Interesting
32220	g21447	sp|P55344|LMIP_HUMAN	-0.713391	-0.692243	Not Interesting
32263	g19241	sp|Q80WQ9|ZBED4_MOUSE	0.584432	0.823749	Not Interesting
32264	g19241	sp|Q80WQ9|ZBED4_MOUSE	0.133715	0.972376	Not Interesting
3230	g32648	sp|Q8CE96|TRM6_MOUSE	-0.902867	-0.747746	Not Interesting
32321	g15630	sp|H2A0N9|KCP4_PINMG	-0.587534	-0.61348	Not Interesting
32325	g15630	sp|H2A0N9|KCP4_PINMG	0.581441	0.580401	Not Interesting
32326	g15631	sp|P0CJ14|VP302_LYCMC	0.980106	0.689981	Not Interesting
32331	g15632	sp|P0CJ14|VP302_LYCMC	1.01475	0.398838	Not Interesting
32346	g15635	NA	-0.826443	-1.28838	Not Interesting
32359	g15636	sp|P42577|FRIS_LYMST	-0.512688	-0.597563	Not Interesting
32371	g3463	NA	0.878957	0.656153	Not Interesting
32393	g3467	NA	-0.402994	-0.834314	Not Interesting
32395	g3468	NA	0.0161017	-0.534919	Not Interesting
32413	g3473	sp|O15127|SCAM2_HUMAN	0.391467	0.754589	Not Interesting
32433	g3486	sp|Q13231|CHIT1_HUMAN	0.534178	0.575955	Not Interesting
32503	g3517	NA	0.55425	1.46088	Not Interesting
32566	g3533	NA	0.392091	0.820815	Not Interesting
32572	g3534	sp|Q5XIH9|HPDL_RAT	-0.968109	-0.814764	Not Interesting
32574	g3534	sp|Q5XIH9|HPDL_RAT	-0.775807	-1.14441	Not Interesting
32641	g3551	NA	-1.11586	-0.709094	Not Interesting
32656	g3553	sp|A0LMC1|PHNX_SYNFM	-1.03245	0.489191	Head
32657	g3553	sp|A0LMC1|PHNX_SYNFM	-0.202557	0.566484	Head
32688	g3561	NA	-0.378318	-0.595483	Not Interesting
32692	g3562	NA	0.273483	0.76278	Not Interesting
327	g18951	sp|P38571|LICH_HUMAN	-0.697484	-1.04115	Not Interesting
32728	g3566	NA	1.05352	1.58621	Not Interesting
32734	g3568	sp|O35490|BHMT1_MOUSE	0.795498	0.522583	Not Interesting
32887	g19368	sp|Q12882|DPYD_HUMAN	-1.08188	0.11352	Not Interesting
32890	g19369	sp|Q28007|DPYD_BOVIN	-1.09122	-0.397128	Not Interesting
32938	g33264	sp|Q6DIV6|VIAAT_XENTR	0.725354	0.409079	Not Interesting
32977	g33271	NA	1.14165	0.340024	Not Interesting
32979	g33271	NA	1.7853	1.35404	Not Interesting
32980	g33271	NA	0.693128	0.435529	Not Interesting
33081	NA	NA	0.548077	0.527541	Not Interesting
33094	g16590	NA	-0.857806	-1.10768	Not Interesting
33103	g16598	NA	-0.824928	-1.19494	Not Interesting
33104	g16599	sp|C6FG12|NLRC5_ICTPU	-0.789794	-0.78784	Not Interesting
33105	g16599	sp|C6FG12|NLRC5_ICTPU	-0.664747	-0.821666	Not Interesting
33112	g16600	NA	0.319657	0.544849	Not Interesting
3315	g800	NA	-0.147424	-0.834421	Not Interesting
33183	g31828	NA	-0.158946	-0.621787	Not Interesting
33214	g32665	sp|Q9VFK6|KMT5A_DROME	0.312132	0.439955	Not Interesting
33243	g11482	sp|Q80WQ9|ZBED4_MOUSE	1.0111	0.965964	Not Interesting
33273	g2026	sp|Q6NZT2|CDR2L_DANRE	-0.599554	-0.851858	Not Interesting
33350	g2041	sp|Q93127|GPR18_AMPAM	-0.71635	-1.0713	Not Interesting
33351	g2041	sp|Q93127|GPR18_AMPAM	-0.402794	-0.63987	Not Interesting
33499	g26572	sp|Q2QUN2|LAC24_ORYSJ	-0.412869	-1.07761	Not Interesting
335	g18952	sp|O15072|ATS3_HUMAN	0.682499	0.653742	Not Interesting
33505	g26573	sp|Q96WM9|LAC2_BOTFU	-1.29839	0.000441479	Not Interesting
33511	g26574	NA	0.215323	0.60402	Not Interesting
33532	g26583	sp|Q68CZ2|TENS3_HUMAN	-0.553518	-0.59064	Not Interesting
33533	g26583	sp|Q68CZ2|TENS3_HUMAN	0.325906	0.80895	Not Interesting
33540	g26583	sp|Q68CZ2|TENS3_HUMAN	-0.712665	-1.33257	Not Interesting
33601	g23162	NA	-0.809651	-1.08143	Not Interesting
33655	g8644	NA	-0.230765	-0.506563	Not Interesting
33663	g8646	NA	-0.94454	-1.44117	Not Interesting
33664	g8646	NA	-1.56702	-0.60511	Not Interesting
33665	g8646	NA	-0.764462	-0.145837	Not Interesting
33677	g8647	sp|Q14767|LTBP2_HUMAN	-1.18075	-1.81161	Not Interesting
33760	g16125	sp|Q9H5L6|THAP9_HUMAN	1.22534	0.866342	Not Interesting
33818	g3893	sp|Q8GXG1|ASPGB_ARATH	0.362093	2.4338	Not Interesting
33860	g3921	sp|Q8BTM8|FLNA_MOUSE	-0.849	-0.0104156	Not Interesting
33865	g3921	sp|Q8BTM8|FLNA_MOUSE	1.01232	0.829389	Not Interesting
33906	g3926	sp|Q28GJ2|CK054_XENTR	-0.359656	-0.548032	Not Interesting
33920	g3929	sp|O75534|CSDE1_HUMAN	0.879455	0.930522	Not Interesting
33949	g3945	NA	0.602804	0.955209	Not Interesting
33967	g3948	sp|Q9KDS9|ACCC_BACHD	-0.474412	-0.910551	Not Interesting
33975	g3950	sp|Q6P5M2|WDR61_DANRE	1.15709	0.836986	Not Interesting
340	g18952	sp|O15072|ATS3_HUMAN	0.284077	1.05089	Not Interesting
34041	g13188	NA	-0.899511	-1.2918	Not Interesting
34051	g13190	sp|Q8MIZ3|DCPS_PIG	-2.19916	-0.836629	Head
342	g18952	sp|O15072|ATS3_HUMAN	0.05358	0.8762	Not Interesting
34204	g28879	NA	1.06634	0.202261	Not Interesting
34209	g28879	NA	-0.694157	-0.90948	Not Interesting
34276	g13275	NA	0.693187	0.583382	Not Interesting
34299	g13293	NA	-0.249443	-0.634181	Not Interesting
34388	g17742	sp|Q5IS41|NCAN_PANTR	-0.339178	-0.654121	Not Interesting
34392	g17742	sp|Q5IS41|NCAN_PANTR	1.14299	1.38897	Not Interesting
34462	g23079	NA	0.216529	0.617567	Not Interesting
34480	g23080	sp|Q5U3Q6|CIP4_DANRE	-0.39213	-1.1808	Not Interesting
34522	g23109	NA	0.886404	1.41892	Not Interesting
3467	g27055	NA	-0.600448	-0.827543	Not Interesting
34719	NA	NA	1.18125	1.63572	Not Interesting
34722	g3811	sp|P07584|ASTA_ASTAS	0.528023	0.848562	Not Interesting
34841	g26592	NA	-0.949597	-0.745363	Not Interesting
34865	g1319	NA	-0.865801	0.484983	Head
34891	g1332	sp|Q9D882|CJ035_MOUSE	0.645006	0.994598	Not Interesting
34912	g1339	NA	-0.747857	-0.887237	Not Interesting
34920	g1347	NA	0.670625	0.324781	Not Interesting
34956	NA	NA	-1.30569	-1.11059	Not Interesting
35021	g27737	sp|Q8SX83|SPEN_DROME	-0.434909	-0.689419	Not Interesting
35027	g14585	sp|D3YXG0|HMCN1_MOUSE	-0.424997	-0.82714	Not Interesting
35055	g14606	sp|Q92831|KAT2B_HUMAN	-0.81451	-0.762658	Not Interesting
3508	g20035	NA	0.98336	1.01771	Not Interesting
35081	g14627	sp|P49135|ERCC3_MOUSE	-0.116294	-0.540208	Not Interesting
3510	g20035	NA	-0.970089	-1.44653	Not Interesting
35119	NA	NA	-0.925398	-1.1109	Not Interesting
3517	g20037	NA	0.415958	0.826051	Not Interesting
35186	g29568	NA	0.927161	0.783183	Not Interesting
3519	g20037	NA	0.0660365	0.728265	Not Interesting
35200	g29570	sp|Q28IG8|TPPC2_XENTR	-0.838288	-0.737141	Not Interesting
35238	g29578	sp|P50538|MAD1_MOUSE	0.42355	0.909944	Not Interesting
35241	g29578	sp|P50538|MAD1_MOUSE	-0.690447	-1.24282	Not Interesting
35242	g29578	sp|P50538|MAD1_MOUSE	-0.538406	-0.51006	Not Interesting
3532	g20040	NA	0.217777	0.571865	Not Interesting
35360	g3810	NA	0.346176	0.820737	Not Interesting
35405	g7855	NA	0.409008	0.878408	Not Interesting
35448	g8160	sp|Q803C9|PTSS1_DANRE	0.958949	0.87425	Not Interesting
3547	g20042	sp|Q66IY8|I2BLA_XENLA	0.452674	0.177796	Not Interesting
3548	g20042	sp|Q66IY8|I2BLA_XENLA	0.514426	0.565508	Not Interesting
3550	g20042	sp|Q66IY8|I2BLA_XENLA	0.460884	0.421726	Not Interesting
3552	g20042	sp|Q66IY8|I2BLA_XENLA	-0.510246	-0.991553	Not Interesting
35526	NA	NA	-1.00596	-1.3174	Not Interesting
35568	g17403	NA	-0.585081	-0.915003	Not Interesting
35588	g17407	NA	-0.440041	-0.830885	Not Interesting
35594	g17408	NA	0.433899	0.706947	Not Interesting
356	g18956	NA	-0.296506	-0.54184	Not Interesting
3560	g20043	NA	0.745525	0.86268	Not Interesting
35635	g32886	NA	-0.51908	-0.84683	Not Interesting
3564	g20044	sp|Q9H095|IQCG_HUMAN	0.701276	0.975332	Not Interesting
35641	g32887	NA	-0.730606	-1.43292	Not Interesting
35649	g32887	NA	-1.06057	-0.71855	Not Interesting
35673	g30153	NA	-1.15673	-1.40656	Not Interesting
3569	g20044	sp|Q9H095|IQCG_HUMAN	0.775914	1.12004	Not Interesting
35706	NA	NA	0.586246	0.591176	Not Interesting
35719	g17479	sp|Q3UHD1|BAI1_MOUSE	-0.609091	-0.857734	Not Interesting
35723	g17479	sp|Q3UHD1|BAI1_MOUSE	-0.440396	-0.886694	Not Interesting
35724	g17479	sp|Q3UHD1|BAI1_MOUSE	-0.368338	-0.769973	Not Interesting
3573	g20045	NA	0.334314	0.890791	Not Interesting
3574	g20045	NA	0.45304	1.12805	Not Interesting
35746	g17485	sp|Q9DE27|RUVB2_XENLA	0.449736	1.35667	Not Interesting
35791	g17499	sp|Q9NVG8|TBC13_HUMAN	-0.690015	-1.20725	Not Interesting
3580	g20048	NA	-0.99622	-0.0365029	Not Interesting
3582	g20049	NA	-0.0252236	0.746546	Not Interesting
35822	g17506	sp|P54707|AT12A_HUMAN	0.516796	0.67715	Not Interesting
3583	g20050	sp|O41033|DUT_PBCV1	-0.885937	-0.140933	Not Interesting
3584	g20051	NA	-1.01219	-0.131008	Not Interesting
35845	g17508	sp|A2RRT9|CP4V2_RAT	0.671465	0.969889	Not Interesting
35878	g14678	NA	-0.0644295	0.844022	Not Interesting
35880	NA	NA	0.0683774	-0.617278	Not Interesting
35912	g2656	NA	0.554217	0.501417	Not Interesting
35917	g2656	NA	-0.613625	-0.887268	Not Interesting
35944	g2661	sp|Q60467|CO5A1_CRILO	-1.07828	-1.80753	Not Interesting
35956	g21046	sp|Q5F3J5|PSME3_CHICK	-0.767035	-1.49837	Not Interesting
35975	g21054	NA	0.765114	0.296982	Not Interesting
35980	g21056	sp|Q29RV1|PDIA4_BOVIN	0.95727	1.42983	Not Interesting
36039	g18085	sp|Q9DGD1|MGT4C_CHICK	0.408539	0.65114	Not Interesting
36079	g18096	NA	0.250344	0.88735	Not Interesting
36082	g18097	sp|Q8C0T5|SI1L1_MOUSE	-0.111949	0.627021	Not Interesting
36108	g18101	NA	1.61655	1.95617	Not Interesting
36112	g18101	NA	-0.143988	-0.80505	Not Interesting
36118	g18102	NA	0.437359	1.36192	Not Interesting
36143	g18120	sp|Q00839|HNRPU_HUMAN	1.39587	1.85172	Not Interesting
36149	g18121	sp|O13146|EPHA3_DANRE	0.652026	0.485951	Not Interesting
36219	g18155	sp|Q4VAC9|PKHG3_MOUSE	-0.153865	-0.733958	Not Interesting
36329	g18184	NA	-0.402383	-0.805476	Not Interesting
36437	g33380	sp|B5XBI1|IF43A_SALSA	1.04426	1.09604	Not Interesting
36441	g33381	sp|Q0V9L1|MMS19_XENTR	-0.346549	-0.660379	Not Interesting
36444	g33389	sp|Q9D071|MMS19_MOUSE	-0.591746	-0.359176	Not Interesting
36463	g33393	NA	0.50339	0.603644	Not Interesting
36466	g33393	NA	-1.08665	0.469065	Not Interesting
36475	g33394	sp|Q91W89|MA2C1_MOUSE	-0.514513	-0.808211	Not Interesting
36477	g33394	sp|Q91W89|MA2C1_MOUSE	-0.178391	-0.776022	Not Interesting
36484	g33394	sp|Q91W89|MA2C1_MOUSE	0.293814	0.525477	Not Interesting
36489	g33396	sp|Q28EM7|OTX5_XENTR	-0.757937	-0.35729	Not Interesting
36513	g33400	sp|A2AJ76|HMCN2_MOUSE	0.733054	0.731574	Not Interesting
36514	g33400	sp|A2AJ76|HMCN2_MOUSE	0.457515	0.140289	Not Interesting
36540	g33404	NA	0.740618	0.759116	Not Interesting
36543	g33404	NA	0.735925	0.82763	Not Interesting
36547	g33404	NA	0.605278	0.855072	Not Interesting
36562	g33408	NA	-0.0159371	0.932906	Not Interesting
36563	g33409	NA	-0.631981	0.21228	Not Interesting
36564	g33409	NA	0.375603	0.992447	Not Interesting
36593	g33422	sp|Q62445|SP4_MOUSE	-0.462708	0.616132	Head
36594	g33422	sp|Q62445|SP4_MOUSE	0.0445281	0.410864	Not Interesting
36595	g33422	sp|Q62445|SP4_MOUSE	-0.139701	0.594308	Not Interesting
36596	g33422	sp|Q62445|SP4_MOUSE	-0.523825	1.39101	Head
36598	g33422	sp|Q62445|SP4_MOUSE	-0.833707	-0.0517933	Head
36617	g33430	sp|P13832|MRLCA_RAT	-0.0341598	-0.409848	Not Interesting
36630	g33432	NA	0.0320332	0.661741	Not Interesting
36653	g33439	sp|O64411|PAO_MAIZE	0.730824	0.266961	Not Interesting
36713	g33449	NA	0.409979	1.11766	Not Interesting
36777	g33464	NA	-0.919031	0.128151	Not Interesting
36796	g33465	sp|P20664|PRI1_MOUSE	-0.53534	-0.0514685	Not Interesting
36857	g17581	sp|P56698|CAC1B_DIPOM	-1.33499	-1.83359	Not Interesting
36859	g17582	sp|Q9CQZ7|RPC10_MOUSE	-0.85791	-0.505665	Not Interesting
36942	g19973	sp|P91953|HE_HEMPU	1.2308	0.119396	Not Interesting
36975	g15125	NA	0.36502	0.466062	Not Interesting
36977	g15125	NA	-1.09911	-0.615221	Not Interesting
36994	g15132	NA	2.11015	1.93331	Not Interesting
37000	g26782	NA	0.380271	0.2496	Not Interesting
37004	g26784	sp|C9D7R3|VMPA3_LOXIN	-0.607547	1.03056	Head
37006	g26784	sp|C9D7R3|VMPA3_LOXIN	0.387108	0.756053	Not Interesting
37023	g26792	NA	0.147994	0.510712	Not Interesting
37063	g26798	sp|P35320|OXIR_STRLI	0.78154	0.406258	Not Interesting
37071	g26801	NA	-0.592007	-1.24972	Not Interesting
37076	g26803	NA	-0.436621	-0.67541	Not Interesting
37118	g26813	NA	-0.363548	-0.607041	Not Interesting
37126	g26815	sp|O95475|SIX6_HUMAN	-1.13597	-0.532756	Not Interesting
37128	g26815	sp|O95475|SIX6_HUMAN	-0.926811	-1.22483	Not Interesting
37147	g26819	NA	0.733235	0.838262	Not Interesting
37159	g26832	NA	0.911632	1.2456	Not Interesting
37164	g26833	sp|P24014|SLIT_DROME	1.08973	0.684326	Not Interesting
37200	g26840	sp|Q566L4|ZN703_XENTR	0.560527	1.17985	Not Interesting
37202	g26840	sp|Q566L4|ZN703_XENTR	-1.33036	0.159855	Head
37203	g26840	sp|Q566L4|ZN703_XENTR	-0.406359	0.614528	Not Interesting
37218	g26846	NA	0.594012	0.739504	Not Interesting
37227	g26846	NA	0.0729828	1.09194	Not Interesting
37237	g26847	NA	1.0542	1.47769	Not Interesting
3739	g23541	sp|Q62798|DRGX_RAT	-0.443946	-0.777745	Not Interesting
37420	g25808	NA	-0.725829	-0.515385	Not Interesting
37438	g25814	NA	0.729571	1.03684	Not Interesting
37445	g25818	NA	-0.448456	-0.635928	Not Interesting
37530	g9617	sp|Q95SX7|RTBS_DROME	0.429145	1.34195	Not Interesting
37552	g20685	sp|P47032|PRY1_YEAST	0.939746	0.246027	Not Interesting
37559	g20686	NA	-0.700407	-0.500991	Not Interesting
37580	g20689	NA	-0.149374	-0.666201	Not Interesting
37600	g20690	sp|Q6TXF1|ARRD3_RAT	0.788509	0.892289	Not Interesting
37602	g20693	NA	0.278487	0.651423	Not Interesting
37613	g20695	NA	-1.34151	-1.04348	Not Interesting
37617	g20696	sp|Q5R5L7|ARRD3_PONAB	-0.708991	-1.00006	Not Interesting
37634	g20700	sp|Q7TPQ9|ARRD3_MOUSE	0.589658	0.732613	Not Interesting
37667	g20710	sp|Q7TPQ9|ARRD3_MOUSE	0.611772	0.519069	Not Interesting
37677	g6940	sp|A6QPT7|ERAP2_BOVIN	-0.273417	-0.714039	Not Interesting
37724	g6958	sp|Q8TEQ6|GEMI5_HUMAN	-0.22491	-0.768574	Not Interesting
37739	g6961	sp|Q9W6F8|WIF1_XENLA	-0.166979	-0.917805	Not Interesting
37786	g6979	sp|Q58CR1|MTFR2_BOVIN	-0.44398	-0.79219	Not Interesting
37792	g6980	NA	-0.778054	-0.434522	Not Interesting
37801	g6980	NA	-0.78455	-0.882452	Not Interesting
37814	g456	sp|P42859|HD_MOUSE	-0.415592	-0.808267	Not Interesting
37815	g456	sp|P42859|HD_MOUSE	-0.0647152	-0.610294	Not Interesting
37824	g459	sp|A7S2N8|UFL1_NEMVE	-0.91735	-0.367786	Not Interesting
37834	g462	NA	0.449235	0.392488	Not Interesting
37877	g10831	NA	-0.273931	-0.873844	Not Interesting
37999	g14374	NA	-0.0531791	-0.641135	Not Interesting
3800	g23550	NA	-0.452772	-0.763392	Not Interesting
38005	g14375	sp|P21328|RTJK_DROME	-0.858267	-0.203777	Not Interesting
3801	g23550	NA	-0.408769	-0.668828	Not Interesting
38037	g14380	sp|O77775|NCF2_BOVIN	0.797085	0.794241	Not Interesting
38039	g14380	sp|O77775|NCF2_BOVIN	0.313444	0.893486	Not Interesting
38043	g14380	sp|O77775|NCF2_BOVIN	1.01142	0.947832	Not Interesting
38067	g14385	sp|Q96WM9|LAC2_BOTFU	-0.554874	-0.762035	Not Interesting
38124	g26216	sp|Q80W31|ZN569_MOUSE	-0.130737	-0.532753	Not Interesting
38179	g26233	NA	1.20531	1.34825	Not Interesting
3821	g23556	sp|Q6IN97|FRP2L_HUMAN	-0.970633	-0.526311	Not Interesting
3825	g23558	sp|Q6PAJ1|BCR_MOUSE	-0.62945	-1.01199	Not Interesting
38278	g21555	NA	0.136336	0.598646	Not Interesting
38285	g21556	NA	1.01781	1.46212	Not Interesting
38289	g21559	sp|Q9UHV9|PFD2_HUMAN	0.91868	0.852977	Not Interesting
38294	g21561	NA	0.990225	0.879145	Not Interesting
38301	g21563	sp|Q9QUJ7|ACSL4_MOUSE	-0.184585	-0.670279	Not Interesting
38337	g15303	NA	0.764643	0.609403	Not Interesting
38372	g10575	sp|A7RR04|EFGM_NEMVE	-0.932826	-1.50723	Not Interesting
38431	g4524	NA	0.994958	1.01182	Not Interesting
38463	g4533	NA	0.275677	1.00976	Not Interesting
38515	g4546	sp|Q24K02|IDE_BOVIN	-0.49463	-0.669199	Not Interesting
38531	g4555	sp|O94817|ATG12_HUMAN	1.00773	2.00695	Not Interesting
38569	g4565	NA	-0.162737	-0.661549	Not Interesting
38597	g4572	sp|O00299|CLIC1_HUMAN	0.570053	1.58446	Not Interesting
38598	g13294	NA	0.316665	0.642705	Not Interesting
38628	g26961	sp|P00976|IBPC_BOVIN	0.199816	1.10721	Not Interesting
38643	g26961	sp|P00976|IBPC_BOVIN	0.964874	1.0912	Not Interesting
38699	g31098	sp|P97858|S35B1_MOUSE	-0.334275	-1.0907	Not Interesting
38721	g14043	sp|Q95SX7|RTBS_DROME	0.507133	0.658777	Not Interesting
38722	g14043	sp|Q95SX7|RTBS_DROME	-0.318204	1.03537	Not Interesting
38730	g14048	sp|Q9UIK4|DAPK2_HUMAN	0.539123	1.31225	Not Interesting
38733	g14048	sp|Q9UIK4|DAPK2_HUMAN	-1.36061	-0.179518	Not Interesting
38780	g14054	NA	-0.487092	-0.906462	Not Interesting
38817	g4731	NA	0.473554	0.259515	Not Interesting
38839	g4733	sp|Q7Z494|NPHP3_HUMAN	0.597387	0.57621	Not Interesting
38862	g4740	NA	0.379496	0.68384	Not Interesting
38974	g17566	NA	0.703189	0.856503	Not Interesting
39016	g16157	NA	-0.0349316	0.869854	Head
39049	g16168	sp|Q90593|GRP78_CHICK	0.250518	0.786925	Not Interesting
3905	g23575	NA	-0.413123	-0.792784	Not Interesting
39051	g16168	sp|Q90593|GRP78_CHICK	1.72727	2.22148	Not Interesting
39182	g21268	NA	0.715598	0.447885	Not Interesting
39187	g21270	sp|Q0V7M1|KPSH1_BOVIN	0.898023	0.89021	Not Interesting
39188	g21270	sp|Q0V7M1|KPSH1_BOVIN	0.614788	1.48597	Not Interesting
39195	g21272	NA	-0.713635	-0.182902	Not Interesting
39199	g21272	NA	0.63862	0.0236195	Not Interesting
39200	g21273	NA	-0.407137	-0.952294	Not Interesting
39203	g21273	NA	1.10253	2.05755	Not Interesting
39204	g21273	NA	-0.834208	-0.68318	Not Interesting
39264	g8784	sp|A1L1W9|MOT10_DANRE	1.20857	1.12711	Not Interesting
39326	g21065	sp|Q5R9A4|DNJB9_PONAB	1.06621	1.46562	Not Interesting
39348	g21068	sp|P13634|CAH1_MOUSE	-0.75023	-0.513782	Not Interesting
39361	g21076	sp|A4IIJ3|KIBRA_XENTR	-0.823117	-0.510942	Not Interesting
39365	g21076	sp|A4IIJ3|KIBRA_XENTR	-0.704486	-0.737735	Not Interesting
39370	g21076	sp|A4IIJ3|KIBRA_XENTR	-0.279897	0.978315	Not Interesting
39375	g21077	sp|Q4R3D6|ZMYM5_MACFA	-0.423619	-0.889965	Not Interesting
39399	g21086	sp|P42325|NCAH_DROME	-0.505774	-0.542051	Not Interesting
394	g18969	sp|Q9UPZ9|ICK_HUMAN	0.626107	0.608476	Not Interesting
39489	g21118	NA	-0.579899	-1.35923	Not Interesting
39508	g21120	sp|Q99MI1|RB6I2_MOUSE	0.36237	0.947271	Not Interesting
39527	g21123	sp|Q16720|AT2B3_HUMAN	0.772829	0.694952	Not Interesting
39555	g21128	NA	0.44117	1.79625	Not Interesting
39556	g21128	NA	2.75394	3.2562	Not Interesting
39557	g21128	NA	1.54906	2.01727	Not Interesting
39563	g21131	NA	-0.566788	-0.847493	Not Interesting
39586	g21141	sp|Q9GRC0|MOS_PATPE	-0.180391	-0.594011	Not Interesting
39587	g21141	sp|Q9GRC0|MOS_PATPE	-0.199611	-0.604041	Not Interesting
39600	g21147	sp|P79888|DCAM_XENLA	-0.700752	0.7987	Head
39673	g32536	sp|Q8VHK1|CSKI2_MOUSE	-0.625993	-1.42533	Not Interesting
39732	g32551	sp|Q5TCZ1|SPD2A_HUMAN	1.93422	2.29342	Not Interesting
39733	g32551	sp|Q5TCZ1|SPD2A_HUMAN	1.86247	2.35806	Not Interesting
39734	g32551	sp|Q5TCZ1|SPD2A_HUMAN	2.78451	3.28871	Not Interesting
39735	g32551	sp|Q5TCZ1|SPD2A_HUMAN	0.841287	1.04744	Not Interesting
39738	g32551	sp|Q5TCZ1|SPD2A_HUMAN	-0.498486	-0.700811	Not Interesting
39739	g32551	sp|Q5TCZ1|SPD2A_HUMAN	-0.194527	-0.492983	Not Interesting
39743	g32552	sp|Q1LYG0|SPD2A_DANRE	-0.344823	-0.901147	Not Interesting
39750	g32557	sp|Q6PCJ9|PPT2A_XENLA	0.644501	1.50588	Not Interesting
39792	g32566	sp|Q5RA10|ADDA_PONAB	-0.0940302	0.755537	Not Interesting
39800	g30594	sp|Q17770|PDI2_CAEEL	0.808425	0.804515	Not Interesting
39804	g30594	sp|Q17770|PDI2_CAEEL	-0.208578	-0.714603	Not Interesting
39809	g30595	sp|Q5F480|ITPK1_CHICK	-0.570222	-0.712214	Not Interesting
39818	g30598	sp|P50232|SYT4_RAT	0.52363	0.998537	Not Interesting
39825	g30599	sp|Q07192|MP2K2_XENLA	-0.24903	-0.63217	Not Interesting
39838	g30605	sp|Q92179|CHST3_CHICK	0.0134285	0.58356	Not Interesting
39854	g3639	sp|Q15427|SF3B4_HUMAN	0.612096	0.243658	Not Interesting
39856	g3639	sp|Q15427|SF3B4_HUMAN	0.809061	0.617099	Not Interesting
3986	g23601	NA	-0.509331	-0.5202	Not Interesting
39864	g3639	sp|Q15427|SF3B4_HUMAN	0.489126	0.72476	Not Interesting
39867	g3639	sp|Q15427|SF3B4_HUMAN	0.430244	0.935578	Not Interesting
39877	g3641	sp|P11533|DMD_CHICK	0.398775	0.896407	Not Interesting
39907	g3650	sp|Q8BGD4|SO4C1_MOUSE	-1.21197	-0.886754	Not Interesting
39922	g3653	sp|O01367|HOW_DROME	-0.388261	-0.805166	Not Interesting
39941	g3658	NA	-0.264384	-0.723165	Not Interesting
3995	g23604	NA	-0.867015	-0.0176338	Head
39954	g3660	NA	1.28844	1.78776	Not Interesting
39955	g3660	NA	1.66486	2.40094	Not Interesting
39957	g3660	NA	0.589469	0.754844	Not Interesting
39959	g3660	NA	-0.0620095	0.503043	Not Interesting
39960	g3660	NA	0.0679307	1.83741	Not Interesting
39975	g26390	NA	-0.968158	-1.13972	Not Interesting
40005	g27691	sp|P41737|LRCH1_FELCA	0.68577	0.937678	Not Interesting
40055	g27710	sp|Q9FJL0|SMC4_ARATH	-0.775319	-0.426371	Not Interesting
40101	g15581	sp|Q3EAQ5|PTR36_ARATH	-0.676748	-0.844561	Not Interesting
40105	g15582	sp|Q670P5|WNT11_XENLA	-0.813285	-0.248439	Not Interesting
4012	g23606	NA	-0.20885	-0.749854	Not Interesting
40122	g15582	sp|Q670P5|WNT11_XENLA	-2.11529	-2.08335	Not Interesting
40144	g15585	NA	0.0733463	1.10008	Not Interesting
40147	g15585	NA	0.410451	1.06529	Not Interesting
4016	g23607	sp|Q99LS3|SERB_MOUSE	0.708706	1.02326	Not Interesting
40160	g22397	sp|Q96EQ9|PRDM9_MOUSE	-0.233594	-0.536426	Not Interesting
40176	g22416	NA	-0.348289	-0.842605	Not Interesting
4018	g23607	sp|Q99LS3|SERB_MOUSE	0.737541	1.09245	Not Interesting
40254	g4192	sp|Q08AY6|KT5AA_XENLA	0.188311	0.765528	Not Interesting
40317	g15106	sp|Q86QH9|H1L1_OSTED	-0.705052	-0.586663	Not Interesting
40345	g15120	sp|Q9CWS0|DDAH1_MOUSE	-0.375602	-0.552287	Not Interesting
40420	g27008	sp|Q9WV54|ASAH1_MOUSE	-0.888131	-0.420241	Not Interesting
40424	g27008	sp|Q9WV54|ASAH1_MOUSE	0.325358	1.22116	Not Interesting
40431	g27009	sp|A3KQV2|BROX_DANRE	0.659515	0.471979	Not Interesting
40479	g27032	NA	-1.07248	0.008191	Head
405	g18977	NA	-0.509152	-0.643411	Not Interesting
4054	g23615	NA	-0.757283	-0.762376	Not Interesting
40543	g4300	sp|Q8BH60|GOPC_MOUSE	-0.793325	-0.979415	Not Interesting
40582	g4304	sp|Q04771|ACVR1_HUMAN	-0.932134	-0.308344	Not Interesting
40609	g4307	sp|O60229|KALRN_HUMAN	-0.0634692	-0.615807	Not Interesting
40652	g4318	NA	0.592389	1.31352	Not Interesting
40654	g4318	NA	0.676919	2.13857	Not Interesting
40655	g4318	NA	1.23866	1.95599	Not Interesting
40656	g4318	NA	0.402898	1.08373	Not Interesting
40659	g4318	NA	0.987768	1.89959	Not Interesting
40662	g4318	NA	-0.349046	-0.721791	Not Interesting
40667	g4319	NA	0.410813	0.7335	Not Interesting
40668	g4319	NA	0.720794	2.76081	Not Interesting
40669	g4319	NA	1.10378	2.542	Not Interesting
40671	g4319	NA	0.359396	1.43506	Not Interesting
40672	g4319	NA	0.343971	1.88611	Not Interesting
40673	g4319	NA	0.480935	1.61751	Not Interesting
40674	g4319	NA	1.04183	2.59657	Not Interesting
40679	g4319	NA	0.483807	1.77003	Not Interesting
40680	g4319	NA	0.154147	2.01731	Not Interesting
40681	g4321	NA	1.39856	2.42649	Not Interesting
40682	g4323	NA	1.62806	2.98549	Not Interesting
40683	g4323	NA	1.99829	3.38002	Not Interesting
40689	g4324	sp|P22274|ARF_CANAL	0.15929	0.796135	Not Interesting
40709	g4326	NA	0.437251	0.430275	Not Interesting
40741	g4334	sp|Q95029|CATL_DROME	0.00673099	0.690205	Not Interesting
40838	g24173	NA	0.820491	0.759145	Not Interesting
40890	g24190	sp|Q921C5|BICD2_MOUSE	-0.416328	-0.538703	Not Interesting
40905	g24192	NA	-0.298419	-0.894619	Not Interesting
40907	g24192	NA	-1.49838	-0.399411	Not Interesting
40967	g24215	NA	-0.0740641	-0.427417	Not Interesting
40977	g24220	sp|Q96RW7|HMCN1_HUMAN	0.787175	1.28891	Not Interesting
41007	g24223	sp|Q9QYS2|GRM3_MOUSE	0.29278	1.2114	Not Interesting
41110	g29094	NA	-0.487345	-0.963864	Not Interesting
41136	g33124	sp|Q96MC6|MF14A_HUMAN	-0.522893	-0.800368	Not Interesting
41199	g29591	NA	-0.762669	-1.181	Not Interesting
41202	g29591	NA	-0.984619	-0.626629	Not Interesting
41206	g29601	sp|Q6DJN2|TRF6B_XENLA	-1.24394	-0.634832	Not Interesting
[truncated: 2,694 more rows]
