# Supplementary material for: Generic injuries are sufficient to induce ectopic Wnt organizers in Hydra
Source: eLife. 2021 Mar 29;10:e60562. doi: 10.7554/eLife.60562 (PMC8049744; doi:10.7554/eLife.60562)
Supplement: Figure 3—source data 1. — The first sheet in the workbook (‘Descriptions’) contains individual descriptions for all tables included in the workbook. [file elife-60562-fig3-data1.xlsx]

## Sheet: Descriptions
Fig. 3C	Used to determine if iCRT14 prevented expression during regeneration or enhanced it. Compares the injury response during head regeneration at 8 hpa (Hi8vHi0 in Sup. File 1) to the change in that response relative to untreated controls (H8vHi8c0 in Sup. File 1).
Fig. 3D	Used to determine if iCRT14 prevented expression during regeneration or enhanced it. Compares the injury response during head regeneration at 12 hpa (Hi12vHi0 in Sup. File 1) to the change in that response relative to untreated controls (H12vHi12c0 in Sup. File 1).
Fig. 3E	Used to determine if iCRT14 prevented expression during regeneration or enhanced it. Compares the injury response during foot regeneration at 8 hpa (Fi8vFi0 in Sup. File 1) to the change in that response relative to untreated controls (F8vFi8c0 in Sup. File 1).
Fig. 3F	Used to determine if iCRT14 prevented expression during regeneration or enhanced it. Compares the injury response during foot regeneration at 12 hpa (Fi12vFi0 in Sup. File 1) to the change in that response relative to untreated controls (F12vFi12c0 in Sup. File 1).
Fig. 3G	Comparison of the injury-induced change in transcript abundance during head and foot regeneration at 8 hpa in iCRT14-treated animals. Combines results from Hi8vHi0 and Fi8vFi0 and uses peaks that passed significance thresholds in Hi8vHi0, Fi8vFi0, or Hi8vFi8c0 (corresponding formulate for comparison names and full results tables provided in Sup. File 2).
Fig. 3H	Comparison of the injury-induced change in chromatin accessibility during head and foot regeneration at 8 hpa in iCRT14-treated animals. Combines results from Hi8Hi0 and Fi8Fi0 and uses peaks that passed significance thresholds in Hi8Hi0, Fi8Fi0, or inhib8c0 (corresponding formulate for comparison names and full results tables provided in Sup. File 1).

## Sheet: Fig. 3C
ID	H8vHi8c0 LogFC	H8vHi8c0 FDR	Hi8vHi0 LogFC	Hi8vHi0 FDR	TCF Function	Swissprot Annotation
g10680 KCP4_PINMG	1.30811	0.00012485	4.81028	4.61049e-19	TCF Inhibited	KCP4_PINMG
g10950	-1.32428	0.000558327	0.270796	0.308263	TCF Dependent
g10986	0.250071	0.183034	1.13606	2.39855e-12	No Change
g11444 ZSWM4_HUMAN	-1.56342	7.78484e-09	-0.309191	0.0418223	TCF Dependent	ZSWM4_HUMAN
g11470 ZSC31_HUMAN	-0.334966	0.166594	0.964803	6.65508e-08	No Change	ZSC31_HUMAN
g1155 ABCG8_DICDI	0.260611	0.492522	-0.306279	0.188099	No Change	ABCG8_DICDI
g11745 MYPT1_CHICK	-0.106663	0.741852	0.748954	1.75854e-05	No Change	MYPT1_CHICK
g11780 SP4_MOUSE	0.0635745	0.844969	-1.5511	5.49358e-13	No Change	SP4_MOUSE
g11950 SIK2_MOUSE	0.725716	0.00314258	1.47934	3.24505e-11	No Change	SIK2_MOUSE
g12223 MYLIP_RAT	0.63996	0.00104901	0.496166	0.000157992	No Change	MYLIP_RAT
g12274 FRIZ2_CAEEL	-1.92272	3.06948e-08	0.141662	0.526436	TCF Dependent	FRIZ2_CAEEL
g12371 RAP1B_XENTR	-1.24553	0.00369224	-2.04642	1.95581e-09	No Change	RAP1B_XENTR
g12567 SOX2_CHICK	-1.84384	0.000256867	0.0636762	0.886631	TCF Dependent	SOX2_CHICK
g12710 RAB12_MOUSE	1.14276	0.000164145	3.56615	7.76491e-19	TCF Inhibited	RAB12_MOUSE
g13587 PRLHR_RAT	1.5168	0.000608512	2.02562	1.0493e-08	TCF Inhibited	PRLHR_RAT
g13698 OPN4A_GADMO	-0.844351	0.0410603	-1.47735	1.47756e-06	No Change	OPN4A_GADMO
g13893 TTC28_MOUSE	0.391371	0.400439	0.526712	0.0699948	No Change	TTC28_MOUSE
g14018 POSTN_HUMAN	-3.47907	0.000730986	-6.57139	8.44141e-13	TCF Dependent	POSTN_HUMAN
g14048 DAPK2_HUMAN	0.642965	0.0256298	1.57592	6.99747e-11	No Change	DAPK2_HUMAN
g14229 GREM2_HUMAN	-1.87964	6.89624e-10	-0.575216	0.000468504	TCF Dependent	GREM2_HUMAN
g14470 MMP14_MOUSE	-4.64675	2.53277e-10	-0.0308537	0.944294	TCF Dependent	MMP14_MOUSE
g1450 JUN_CHICK	1.14324	2.16768e-05	1.74962	4.3679e-13	TCF Inhibited	JUN_CHICK
g14685 SPY2_BOVIN	0.766905	0.00107323	1.11252	2.15883e-09	No Change	SPY2_BOVIN
g14938 AXIN1_HUMAN	-1.56443	1.37012e-10	0.0502898	0.744506	TCF Dependent	AXIN1_HUMAN
g15226 ARX_RAT	-2.54867	1.23003e-11	-1.41338	8.45984e-10	TCF Dependent	ARX_RAT
g15494 VWDE_HUMAN	0.551442	0.0452725	2.75871	1.35645e-17	No Change	VWDE_HUMAN
g15655 FEZF2_BOVIN	-1.19195	0.00267323	-0.723932	0.00670626	No Change	FEZF2_BOVIN
g15679	0.2478	0.34267	0.795485	2.86787e-06	No Change
g15894 DUT_RHILW	1.56221	0.00625923	2.672	2.66392e-09	No Change	DUT_RHILW
g1591 ROR1_HUMAN	-0.966445	1.92335e-05	-0.642857	1.75458e-05	TCF Dependent	ROR1_HUMAN
g15913 KCNK9_XENLA	-1.3997	0.0546618	1.46332	0.00111518	No Change	KCNK9_XENLA
g16165 ZIC4_MOUSE	-3.20659	0.0256905	0.921465	0.375219	No Change	ZIC4_MOUSE
g16491 CREB_HYDVD	0.966647	3.31871e-05	1.90292	1.23087e-15	TCF Inhibited	CREB_HYDVD
g1705 ANR44_HUMAN	-1.52798	8.62517e-05	0.405925	0.105573	TCF Dependent	ANR44_HUMAN
g1708 LOXH1_MOUSE	-0.234705	0.589115	-0.705583	0.00419878	No Change	LOXH1_MOUSE
g17392 SAXO1_MACFA	-0.840819	0.0166933	-0.364343	0.136865	No Change	SAXO1_MACFA
g18200 RIT2_HUMAN	0.451573	0.0800056	1.42603	2.78708e-11	No Change	RIT2_HUMAN
g18245 DLLH_BRAFL	-0.325232	0.391645	-0.780714	0.000574406	No Change	DLLH_BRAFL
g18475 FORF_DICDI	-0.855418	0.0156718	-1.22124	1.91588e-06	No Change	FORF_DICDI
g18477 FORF_DICDI	0.130716	0.763894	-0.807899	0.000479178	No Change	FORF_DICDI
g18779 NPY4R_MOUSE	-0.477424	0.646407	-2.50848	3.04635e-05	No Change	NPY4R_MOUSE
g18842 WLS_MOUSE	0.36933	0.257174	3.74325	9.61892e-20	No Change	WLS_MOUSE
g19105	5.6754	0.00614389	5.82022	0.000614176	No Change
g19253 CALB2_RAT	-0.524264	0.0475562	-0.190249	0.309641	No Change	CALB2_RAT
g19768 RASS_DICDI	2.08606	2.1503e-08	3.52819	1.4293e-17	TCF Inhibited	RASS_DICDI
g19890	1.25019	0.0193141	2.27522	4.76737e-08	No Change
g20391 SF3A2_RAT	-0.695357	0.000914134	-0.437404	0.00164878	TCF Dependent	SF3A2_RAT
g20504 LIN41_CHICK	-0.122456	0.63575	0.246267	0.0900301	No Change	LIN41_CHICK
g20613	0.00781849	0.990618	0.914485	0.00625471	No Change
g2068	0.153934	0.675693	0.872361	2.49346e-05	No Change
g20911 GATA2_XENLA	-0.0492037	0.924533	-1.7998	3.34296e-10	No Change	GATA2_XENLA
g21006 ASPG_DIRIM	1.44482	2.17963e-08	0.118855	0.455898	No Change	ASPG_DIRIM
g21076 KIBRA_XENTR	-0.765875	0.000102468	-0.218921	0.0899588	TCF Dependent	KIBRA_XENTR
g21163	-1.36659	3.65545e-05	-1.69687	3.51417e-10	TCF Dependent
g21761 DMRT2_HUMAN	-1.05082	0.0603844	0.523131	0.184165	No Change	DMRT2_HUMAN
g2198 K1958_HUMAN	0.0100727	0.994647	-1.86627	0.00148263	No Change	K1958_HUMAN
g22114	0.528419	0.0356817	3.60183	5.77087e-21	No Change
g22319 KDIS_DANRE	-0.297354	0.17242	-0.850883	8.98229e-08	No Change	KDIS_DANRE
g22869	-1.67828	3.31675e-09	-1.67459	1.9597e-13	TCF Dependent
g22934	1.51876	4.85778e-05	4.811	4.53689e-20	TCF Inhibited
g22965	-0.266587	0.122593	-0.29718	0.00709537	No Change
g23256 MFSD8_MOUSE	-0.448133	0.120214	-0.0874381	0.697987	No Change	MFSD8_MOUSE
g23270 FSHR_CAIMO	-0.232823	0.221175	-0.225977	0.0606651	No Change	FSHR_CAIMO
g23421 IABF_STRAW	2.73532	4.06161e-07	6.18848	3.3775e-19	TCF Inhibited	IABF_STRAW
g23571	0.808169	3.85479e-05	1.36105	8.90925e-14	TCF Inhibited
g23588 TRAF4_MOUSE	-0.936171	0.0164657	-0.152024	0.624145	No Change	TRAF4_MOUSE
g23859 VILI_CHICK	0.0475258	0.924952	0.0178133	0.955524	No Change	VILI_CHICK
g23916	0.251923	0.565884	-0.0650829	0.833809	No Change
g24114 OTX2_XENTR	-3.01421	7.23839e-13	-2.52926	1.27291e-15	TCF Dependent	OTX2_XENTR
g24126 FOXA2_ORYLA	-1.74258	5.21147e-09	-1.08131	2.52863e-08	TCF Dependent	FOXA2_ORYLA
g24191 FA5_BOVIN	-1.15549	0.334633	2.06574	0.00248683	No Change	FA5_BOVIN
g24483 DCC_MOUSE	-0.364527	0.256514	-0.00581118	0.983723	No Change	DCC_MOUSE
g24647	-0.0805985	0.856027	0.0335028	0.906159	No Change
g24911	-0.370979	0.0759888	0.764065	3.54905e-07	No Change
g24936 PSD10_DICDI	-2.90018	3.05565e-08	-5.08171	1.34391e-18	TCF Dependent	PSD10_DICDI
g24952 BRAC_HUMAN	-1.77824	0.000982749	2.06116	3.80175e-07	No Change	BRAC_HUMAN
g25044	0.312443	0.438466	2.13936	9.12398e-12	No Change
g25176 SQSTM_PONAB	1.68684	1.62715e-12	3.34723	8.73578e-25	TCF Inhibited	SQSTM_PONAB
g25284 PRDM6_MOUSE	-0.718915	2.83932e-05	-0.543389	3.19614e-06	TCF Dependent	PRDM6_MOUSE
g25564	0.617237	0.256693	0.955758	0.00108868	No Change
g25893	2.00823	0.00171043	3.01167	6.56297e-09	No Change
g26393	-0.183903	0.731182	0.426094	0.15124	No Change
g26748	-0.194632	0.841811	0.934954	0.0557154	No Change
g26840 ZN703_XENTR	-0.957349	0.00458842	-0.103671	0.708023	No Change	ZN703_XENTR
g26858 DRD1_XENLA	-0.571704	0.0892713	1.16455	5.35651e-07	No Change	DRD1_XENLA
g27008 ASAH1_MOUSE	0.345652	0.103966	0.51018	0.000324393	No Change	ASAH1_MOUSE
g27164 FLNA_HUMAN	-0.464277	0.0173014	0.0326544	0.848444	No Change	FLNA_HUMAN
g27334 GLNA_PANAR	0.637806	0.22095	1.97954	2.32374e-07	No Change	GLNA_PANAR
g27364 PANG1_DROME	-0.926409	2.26428e-05	0.305295	0.0340368	TCF Dependent	PANG1_DROME
g27778 LAMC_DROME	-0.898455	0.0642516	0.0620986	0.887612	No Change	LAMC_DROME
g27807 GBRB1_MOUSE	-1.8851	0.000135281	-1.02166	0.00148263	TCF Dependent	GBRB1_MOUSE
g27891 FZD4_RAT	-1.1038	1.91123e-08	-0.729685	1.55987e-08	TCF Dependent	FZD4_RAT
g28042 ARHB_XENLA	-1.6392	2.01971e-07	-2.34244	1.53923e-15	TCF Dependent	ARHB_XENLA
g28064 WNT3_MOUSE	0.332542	0.417381	3.40064	1.35645e-17	No Change	WNT3_MOUSE
g28166 PFI_PTIFI	-3.1685	4.83953e-10	0.29603	0.258888	TCF Dependent	PFI_PTIFI
g28449 FD4_DROME	-0.682535	0.236599	-2.19915	3.6461e-07	No Change	FD4_DROME
g28700 MPRG_HUMAN	-1.60264	0.0005982	-2.38021	7.09506e-10	TCF Dependent	MPRG_HUMAN
g28717	1.27106	0.0199068	4.79702	4.29661e-16	No Change
g28791	4.36047	5.52514e-06	7.50038	3.78557e-19	TCF Inhibited
g28992 EGL4_CAEEL	-0.562653	0.0712983	0.529619	0.00688747	No Change	EGL4_CAEEL
g29030 MTPN_RAT	-1.20994	0.00227329	-0.735052	0.00431146	No Change	MTPN_RAT
g29161 NANO1_DANRE	-1.15708	0.007567	-0.257426	0.427704	No Change	NANO1_DANRE
g29234 SH3R1_XENTR	0.00677344	0.984251	0.294008	0.030492	No Change	SH3R1_XENTR
g29352	-0.106025	0.849625	0.0966408	0.777376	No Change
g29387 CAS4_EPHMU	0.16928	0.841972	1.00784	0.0111855	No Change	CAS4_EPHMU
g29412 ECE1_CAVPO	-0.318964	0.267995	-1.50068	1.3959e-10	No Change	ECE1_CAVPO
g29781 DVL2_XENTR	-0.420698	0.0553182	0.367029	0.0102049	No Change	DVL2_XENTR
g30252	-0.7188	0.118667	-0.244793	0.482591	No Change
g30386 VENT1_XENTR	-4.25362	5.42121e-06	-2.12903	0.000329947	TCF Dependent	VENT1_XENTR
g30442	-0.91869	0.000814845	1.40991	4.12645e-10	No Change
g30478 SMAD4_PIG	-0.748884	0.000172681	-0.477575	0.000320868	TCF Dependent	SMAD4_PIG
g30573 HLDE_SHESA	1.10613	0.00471645	2.41558	2.05746e-11	No Change	HLDE_SHESA
g30660 SNX11_MOUSE	-1.42403	1.32538e-06	-1.53168	1.89928e-11	TCF Dependent	SNX11_MOUSE
g30865 PXDN_DROME	-1.71431	2.12746e-05	-0.261076	0.342332	TCF Dependent	PXDN_DROME
g31440 NPYR_DROME	-0.982288	0.00107795	-1.80187	1.12782e-11	No Change	NPYR_DROME
g31954 NKX25_XENLA	-0.0361401	0.971446	-1.1501	0.00709537	No Change	NKX25_XENLA
g32238	-0.847353	0.014591	1.13631	1.82424e-06	No Change
g32669	-0.0295864	0.969317	-0.682236	0.0322387	No Change
g32877 BMP7_MOUSE	1.31277	1.0608e-07	0.872695	7.27942e-08	TCF Inhibited	BMP7_MOUSE
g32919	-1.09622	0.0119029	-2.89552	1.52693e-12	No Change
g33373 WNT7B_HUMAN	-3.87199	0.000415772	3.71178	3.63893e-09	No Change	WNT7B_HUMAN
g33422 SP4_MOUSE	-1.26493	2.7383e-07	1.29136	1.80448e-11	No Change	SP4_MOUSE
g33581	2.49302	4.83953e-10	4.49018	7.52262e-21	TCF Inhibited
g33661 CPEB1_PONAB	1.55115	1.16746e-11	1.3698	3.92662e-15	TCF Inhibited	CPEB1_PONAB
g33690 RTJK_DROME	-1.92205	3.67214e-05	-0.87735	0.00500765	TCF Dependent	RTJK_DROME
g3553 PHNX_SYNFM	0.385755	0.104287	0.369941	0.0192337	No Change	PHNX_SYNFM
g3694	-0.99736	0.025951	-0.0255187	0.951083	No Change
g3847 DMTA2_XENTR	-1.06486	1.88272e-06	-1.43603	3.17367e-13	TCF Dependent	DMTA2_XENTR
g4024	-0.249648	0.487725	0.490987	0.0212219	No Change
g4416	-0.35186	0.818013	0.626397	0.510002	No Change
g4715	1.77026	2.82822e-06	2.81105	1.59801e-15	TCF Inhibited
g4917 TLD_DROME	-0.542632	0.207177	-2.26417	5.80125e-11	No Change	TLD_DROME
g5003 GAPR1_HUMAN	-0.995251	9.12019e-05	-0.440729	0.00634654	TCF Dependent	GAPR1_HUMAN
g5147	-2.00178	0.00020594	-0.766229	0.0282329	TCF Dependent
g5250	0.638063	0.579691	0.559615	0.480306	No Change
g5410	-1.49415	2.20593e-06	0.171037	0.411843	TCF Dependent
g5411	0.336447	0.432373	2.21074	6.50852e-11	No Change
g5455	0.577016	0.0684292	1.70011	7.46944e-11	No Change
g556	-0.792671	0.000637555	-1.26727	6.38423e-11	TCF Dependent
g5621 PITX1_XENLA	-3.71015	3.87414e-08	-1.86694	1.20501e-05	TCF Dependent	PITX1_XENLA
g5735 RHG06_MOUSE	-1.291	3.76263e-06	-2.49638	7.80677e-17	TCF Dependent	RHG06_MOUSE
g5882 SAL_SILAS	1.45601	1.91123e-08	3.18418	3.10844e-21	TCF Inhibited	SAL_SILAS
g5987	0.439725	0.406065	0.402786	0.237477	No Change
g5995 MKNK1_MOUSE	0.310042	0.296945	0.108409	0.614792	No Change	MKNK1_MOUSE
g6131 CP17A_ICTPU	-1.02631	0.246699	1.00016	0.0861068	No Change	CP17A_ICTPU
g6418 TGMH_TACTR	0.106538	0.742408	0.150266	0.422658	No Change	TGMH_TACTR
g7216 RHG23_HUMAN	0.365833	0.15477	-0.101897	0.594939	No Change	RHG23_HUMAN
g7738	-0.205933	0.499402	0.419961	0.0166844	No Change
g8144 ZMYM5_BOVIN	-2.99789	0.21087	1.96877	0.133584	No Change	ZMYM5_BOVIN
g9042 RTJK_DROME	-8.95005	7.60582e-08	0.0366763	0.928282	TCF Dependent	RTJK_DROME
g9063 FLVC2_HUMAN	-0.217297	0.708868	-0.0925229	0.803485	No Change	FLVC2_HUMAN
g9693 CAS4_EPHMU	-0.85112	0.0721425	0.34411	0.306014	No Change	CAS4_EPHMU
g9994 RS11_MAGSA	-1.58655	5.60302e-08	0.871044	1.91456e-06	No Change	RS11_MAGSA

## Sheet: Fig. 3D
ID	H12vFi12c0 LogFC	H12vHi12c0 FDR	Hi12vHi0 LogFC	Hi12vHi0 FDR	TCF Function	Swissprot Annotation
g10680 KCP4_PINMG	0.785664	0.00815087	5.74525	1.07755e-20	No Change	KCP4_PINMG
g10950	-1.95445	2.10315e-06	0.315061	0.181732	TCF Dependent
g10986	0.0646216	0.714808	1.49002	1.75153e-15	No Change
g11444 ZSWM4_HUMAN	-1.28452	2.06961e-07	0.257877	0.0575674	TCF Dependent	ZSWM4_HUMAN
g11470 ZSC31_HUMAN	-1.06083	6.15325e-06	1.39909	1.32299e-11	No Change	ZSC31_HUMAN
g1155 ABCG8_DICDI	0.328508	0.34038	-1.31803	5.79497e-07	No Change	ABCG8_DICDI
g11745 MYPT1_CHICK	-0.024693	0.930577	0.5244	0.000882467	No Change	MYPT1_CHICK
g11780 SP4_MOUSE	-0.58312	0.00738277	-2.10458	6.40993e-16	No Change	SP4_MOUSE
g11950 SIK2_MOUSE	0.504812	0.0209593	1.192	2.90841e-09	No Change	SIK2_MOUSE
g12223 MYLIP_RAT	-0.099426	0.613128	0.239423	0.0460671	No Change	MYLIP_RAT
g12274 FRIZ2_CAEEL	-2.27227	5.43743e-10	1.05701	3.43618e-07	No Change	FRIZ2_CAEEL
g12371 RAP1B_XENTR	-1.37694	0.00104062	-2.65474	1.32259e-11	No Change	RAP1B_XENTR
g12567 SOX2_CHICK	-2.47543	1.86503e-06	0.698492	0.0217907	No Change	SOX2_CHICK
g12710 RAB12_MOUSE	0.751126	0.00521896	3.51268	8.90511e-19	No Change	RAB12_MOUSE
g13587 PRLHR_RAT	0.605688	0.12095	1.57521	9.74022e-07	No Change	PRLHR_RAT
g13698 OPN4A_GADMO	-0.74456	0.0376438	-1.03472	0.000131526	No Change	OPN4A_GADMO
g13893 TTC28_MOUSE	1.96218	3.83692e-05	0.391605	0.152159	No Change	TTC28_MOUSE
g14018 POSTN_HUMAN	-3.54891	8.83968e-06	-5.78405	5.38352e-14	TCF Dependent	POSTN_HUMAN
g14048 DAPK2_HUMAN	-0.408324	0.112631	0.926354	2.89018e-06	No Change	DAPK2_HUMAN
g14229 GREM2_HUMAN	-1.69988	5.76929e-09	0.0196654	0.908104	TCF Dependent	GREM2_HUMAN
g14470 MMP14_MOUSE	-5.59769	1.09577e-12	0.458068	0.0972252	TCF Dependent	MMP14_MOUSE
g1450 JUN_CHICK	0.854447	0.000475503	1.18023	4.52299e-09	TCF Inhibited	JUN_CHICK
g14685 SPY2_BOVIN	0.146774	0.503875	1.04976	5.79486e-09	No Change	SPY2_BOVIN
g14938 AXIN1_HUMAN	-1.38491	1.19518e-09	0.875396	2.4446e-09	No Change	AXIN1_HUMAN
g15226 ARX_RAT	-3.07525	1.20094e-13	-0.737408	5.34295e-05	TCF Dependent	ARX_RAT
g15494 VWDE_HUMAN	-0.229616	0.360618	2.81173	5.91881e-18	No Change	VWDE_HUMAN
g15655 FEZF2_BOVIN	-2.03419	2.06533e-06	-1.34527	5.31314e-06	TCF Dependent	FEZF2_BOVIN
g15679	-0.20949	0.371312	0.32198	0.0334584	No Change
g15894 DUT_RHILW	0.552936	0.297203	2.3411	4.19909e-08	No Change	DUT_RHILW
g1591 ROR1_HUMAN	-0.913042	1.97112e-05	-0.0841534	0.532959	TCF Dependent	ROR1_HUMAN
g15913 KCNK9_XENLA	-2.15421	0.00119766	1.80503	5.11196e-05	No Change	KCNK9_XENLA
g16165 ZIC4_MOUSE	-5.08775	0.00032066	0.581696	0.530414	No Change	ZIC4_MOUSE
g16491 CREB_HYDVD	1.00837	8.27179e-06	2.0365	1.49701e-16	TCF Inhibited	CREB_HYDVD
g1705 ANR44_HUMAN	-1.22552	0.000463482	0.594813	0.00857733	No Change	ANR44_HUMAN
g1708 LOXH1_MOUSE	0.277456	0.476349	-1.14477	1.99564e-05	No Change	LOXH1_MOUSE
g17392 SAXO1_MACFA	-1.21839	0.000163744	-0.148536	0.480032	TCF Dependent	SAXO1_MACFA
g18200 RIT2_HUMAN	-0.458055	0.0489875	1.36827	1.67194e-10	No Change	RIT2_HUMAN
g18245 DLLH_BRAFL	-1.12045	0.000756646	-1.34115	3.9322e-07	TCF Dependent	DLLH_BRAFL
g18475 FORF_DICDI	-1.35459	0.000180296	-2.17342	5.01833e-11	TCF Dependent	FORF_DICDI
g18477 FORF_DICDI	-0.0740566	0.851879	-2.2163	9.44011e-12	No Change	FORF_DICDI
g18779 NPY4R_MOUSE	-2.52257	0.00617652	-4.5222	7.79032e-08	No Change	NPY4R_MOUSE
g18842 WLS_MOUSE	1.67654	4.61794e-07	4.75593	1.5964e-22	TCF Inhibited	WLS_MOUSE
g19105	6.30841	0.00134766	5.13832	0.00220552	No Change
g19253 CALB2_RAT	-0.755119	0.00201681	-0.151167	0.347701	No Change	CALB2_RAT
g19768 RASS_DICDI	1.92228	1.17106e-07	3.27462	8.20691e-17	TCF Inhibited	RASS_DICDI
g19890	0.685405	0.158415	1.38022	0.000137722	No Change
g20391 SF3A2_RAT	-1.1747	3.97441e-07	-0.0206592	0.888545	TCF Dependent	SF3A2_RAT
g20504 LIN41_CHICK	-0.757985	0.000144112	0.477592	0.000295152	TCF Dependent	LIN41_CHICK
g20613	0.424135	0.345267	0.992183	0.00157177	No Change
g2068	0.217676	0.458827	0.495165	0.00838274	No Change
g20911 GATA2_XENLA	-0.593988	0.0533838	-1.4609	1.74105e-08	No Change	GATA2_XENLA
g21006 ASPG_DIRIM	0.795009	0.000161509	-0.438468	0.0013976	No Change	ASPG_DIRIM
g21076 KIBRA_XENTR	-0.325597	0.0543103	0.450437	0.000210015	No Change	KIBRA_XENTR
g21163	-1.6544	8.78477e-07	-1.6386	5.88733e-10	TCF Dependent
g21761 DMRT2_HUMAN	-0.970969	0.0436525	1.46553	5.2748e-05	No Change	DMRT2_HUMAN
g2198 K1958_HUMAN	-0.527099	0.525084	-2.30045	0.000108019	No Change	K1958_HUMAN
g22114	-0.0105174	0.96926	3.69556	2.60969e-21	No Change
g22319 KDIS_DANRE	-0.776802	9.89316e-05	-1.13278	9.4117e-11	TCF Dependent	KDIS_DANRE
g22869	-1.52721	1.00573e-08	-0.69653	1.075e-05	TCF Dependent
g22934	1.008	0.00262907	4.92236	2.77307e-20	No Change
g22965	-0.658707	5.70407e-05	-0.247708	0.0141272	TCF Dependent
g23256 MFSD8_MOUSE	-1.13119	3.60903e-05	-0.182294	0.286509	TCF Dependent	MFSD8_MOUSE
g23270 FSHR_CAIMO	-0.604723	0.000348373	-0.440699	0.000146037	TCF Dependent	FSHR_CAIMO
g23421 IABF_STRAW	2.64304	4.7461e-07	6.94117	1.60518e-20	TCF Inhibited	IABF_STRAW
g23571	-0.0992846	0.586648	0.857035	4.70143e-09	No Change
g23588 TRAF4_MOUSE	-1.90415	2.07876e-06	-0.680215	0.00426819	TCF Dependent	TRAF4_MOUSE
g23859 VILI_CHICK	-0.282223	0.418527	-1.08575	1.16428e-05	No Change	VILI_CHICK
g23916	-0.577101	0.0877863	-0.74028	0.00148519	No Change
g24114 OTX2_XENTR	-2.05909	1.80428e-09	-0.655377	0.000258492	TCF Dependent	OTX2_XENTR
g24126 FOXA2_ORYLA	-1.86787	7.29526e-10	-0.0598946	0.715313	TCF Dependent	FOXA2_ORYLA
g24191 FA5_BOVIN	-3.35885	0.00147765	0.66438	0.319026	No Change	FA5_BOVIN
g24483 DCC_MOUSE	-0.647367	0.0132505	0.104121	0.572467	No Change	DCC_MOUSE
g24647	-0.244407	0.416857	-0.121807	0.557801	No Change
g24911	-0.540175	0.00440773	1.20838	1.0082e-11	No Change
g24936 PSD10_DICDI	-2.79122	4.28291e-06	-6.40055	1.27173e-19	TCF Dependent	PSD10_DICDI
g24952 BRAC_HUMAN	-1.96186	0.000125224	2.95856	1.91086e-10	No Change	BRAC_HUMAN
g25044	-0.981396	0.00423299	1.67294	4.57112e-09	No Change
g25176 SQSTM_PONAB	2.4355	1.12747e-16	3.73639	3.90517e-26	TCF Inhibited	SQSTM_PONAB
g25284 PRDM6_MOUSE	-0.704069	1.67054e-05	-0.0472022	0.653702	TCF Dependent	PRDM6_MOUSE
g25564	0.223617	0.650327	0.841109	0.00197162	No Change
g25893	0.435084	0.467936	1.75388	2.70266e-05	No Change
g26393	0.247858	0.540704	1.37018	5.48839e-06	No Change
g26748	-1.06616	0.0981427	0.596556	0.198944	No Change
g26840 ZN703_XENTR	-1.24232	0.000120375	0.127118	0.557079	TCF Dependent	ZN703_XENTR
g26858 DRD1_XENLA	-0.904173	0.00278569	1.57003	7.29538e-10	No Change	DRD1_XENLA
g27008 ASAH1_MOUSE	-0.0570436	0.778216	0.753148	2.00551e-07	No Change	ASAH1_MOUSE
g27164 FLNA_HUMAN	-0.573279	0.00115807	0.344735	0.00307133	No Change	FLNA_HUMAN
g27334 GLNA_PANAR	-0.367532	0.414238	2.47854	3.38886e-09	No Change	GLNA_PANAR
g27364 PANG1_DROME	-1.35435	1.56444e-08	1.0746	8.18589e-10	No Change	PANG1_DROME
g27778 LAMC_DROME	-1.17155	0.00538796	-0.373107	0.176371	No Change	LAMC_DROME
g27807 GBRB1_MOUSE	-2.51809	1.00629e-06	-1.34012	4.00568e-05	TCF Dependent	GBRB1_MOUSE
g27891 FZD4_RAT	-1.44205	4.47804e-11	-0.565322	1.3725e-06	TCF Dependent	FZD4_RAT
g28042 ARHB_XENLA	-1.8464	4.06116e-08	-3.15768	1.56708e-18	TCF Dependent	ARHB_XENLA
g28064 WNT3_MOUSE	0.151926	0.678512	3.77122	6.6708e-19	No Change	WNT3_MOUSE
g28166 PFI_PTIFI	-4.43025	1.84556e-13	0.865265	0.000257094	No Change	PFI_PTIFI
g28449 FD4_DROME	-2.22241	4.11239e-05	-2.71721	1.20449e-08	TCF Dependent	FD4_DROME
g28700 MPRG_HUMAN	-0.963068	0.0297796	-2.76107	5.94871e-11	No Change	MPRG_HUMAN
g28717	1.29292	0.00957215	5.14584	6.14419e-17	No Change
g28791	3.78408	1.93506e-05	7.91382	4.307e-20	TCF Inhibited
g28992 EGL4_CAEEL	-1.54338	1.6385e-06	-0.083961	0.665526	TCF Dependent	EGL4_CAEEL
g29030 MTPN_RAT	-1.64759	1.49333e-05	-0.433605	0.0564267	TCF Dependent	MTPN_RAT
g29161 NANO1_DANRE	-1.25316	0.00143036	0.640124	0.012688	No Change	NANO1_DANRE
g29234 SH3R1_XENTR	-0.596935	0.00159605	0.329182	0.00765877	No Change	SH3R1_XENTR
g29352	-0.642171	0.0825402	-0.754047	0.00395806	No Change
g29387 CAS4_EPHMU	-1.33246	0.0114729	1.02974	0.0050664	No Change	CAS4_EPHMU
g29412 ECE1_CAVPO	-0.930228	0.000181315	-1.86453	1.13151e-13	TCF Dependent	ECE1_CAVPO
g29781 DVL2_XENTR	-1.09469	1.4171e-06	0.626226	1.52229e-05	No Change	DVL2_XENTR
g30252	-0.988468	0.0124713	-0.773766	0.00521226	No Change
g30386 VENT1_XENTR	-6.64562	1.32851e-09	-2.45132	8.25072e-05	TCF Dependent	VENT1_XENTR
g30442	-1.22662	1.6458e-05	1.62003	2.39677e-11	No Change
g30478 SMAD4_PIG	-0.725922	9.84048e-05	-0.210853	0.0696361	TCF Dependent	SMAD4_PIG
g30573 HLDE_SHESA	1.54054	5.47197e-05	2.56058	3.70838e-12	TCF Inhibited	HLDE_SHESA
g30660 SNX11_MOUSE	-1.31226	3.59292e-06	-1.47201	1.09863e-10	TCF Dependent	SNX11_MOUSE
g30865 PXDN_DROME	-1.49214	6.18895e-05	0.532763	0.0215243	No Change	PXDN_DROME
g31440 NPYR_DROME	-1.51635	2.2276e-06	-2.5033	6.08669e-15	TCF Dependent	NPYR_DROME
g31954 NKX25_XENLA	-0.617577	0.264594	-1.53088	0.000105206	No Change	NKX25_XENLA
g32238	0.2653	0.426273	1.0753	3.01664e-06	No Change
g32669	-0.866841	0.056138	-1.99577	1.27986e-07	No Change
g32877 BMP7_MOUSE	1.21597	3.16331e-07	0.68738	3.89745e-06	TCF Inhibited	BMP7_MOUSE
g32919	-1.82934	3.41607e-05	-3.50908	2.68117e-14	TCF Dependent
g33373 WNT7B_HUMAN	-3.47185	0.000533265	4.61605	5.06635e-12	No Change	WNT7B_HUMAN
g33422 SP4_MOUSE	-1.12379	1.25448e-06	1.86303	1.35276e-15	No Change	SP4_MOUSE
g33581	2.12611	8.47614e-09	4.01958	6.62861e-20	TCF Inhibited
g33661 CPEB1_PONAB	0.808545	3.39022e-06	0.969242	1.94414e-11	TCF Inhibited	CPEB1_PONAB
g33690 RTJK_DROME	-0.923943	0.020363	0.230204	0.409194	No Change	RTJK_DROME
g3553 PHNX_SYNFM	-0.225601	0.277986	0.547612	0.000251791	No Change	PHNX_SYNFM
g3694	-1.57177	0.00019041	-0.397056	0.137921	TCF Dependent
g3847 DMTA2_XENTR	-2.01537	1.66805e-12	-1.59891	8.05777e-15	TCF Dependent	DMTA2_XENTR
g4024	0.294448	0.300125	1.33387	1.88775e-08	No Change
g4416	0.916034	0.346899	1.46172	0.0393347	No Change
g4715	1.82472	1.81037e-06	2.41239	1.21354e-13	TCF Inhibited
g4917 TLD_DROME	-1.12944	0.00283988	-2.63096	2.1933e-12	No Change	TLD_DROME
g5003 GAPR1_HUMAN	-1.88135	1.43589e-09	-0.324581	0.0363183	TCF Dependent	GAPR1_HUMAN
g5147	-2.8399	1.74227e-06	-0.999854	0.00466865	TCF Dependent
g5250	6.49349	6.33902e-06	0.763562	0.225557	TCF Inhibited
g5410	-1.25647	1.03743e-05	1.18403	1.22661e-08	No Change
g5411	0.132804	0.737321	2.35039	2.59502e-11	No Change
g5455	0.31493	0.26329	1.98718	1.26754e-12	No Change
g556	-1.31139	2.39127e-07	-1.75863	2.401e-14	TCF Dependent
g5621 PITX1_XENLA	-3.93803	1.66367e-09	-0.199125	0.541194	TCF Dependent	PITX1_XENLA
g5735 RHG06_MOUSE	-1.03659	0.000108433	-2.36107	1.44803e-15	TCF Dependent	RHG06_MOUSE
g5882 SAL_SILAS	1.77921	2.14799e-10	3.86134	2.7451e-23	TCF Inhibited	SAL_SILAS
g5987	2.58031	9.02704e-06	0.296235	0.352597	No Change
g5995 MKNK1_MOUSE	-0.97683	0.000288363	-0.62378	0.000535301	TCF Dependent	MKNK1_MOUSE
g6131 CP17A_ICTPU	-1.75524	0.0131939	1.1897	0.0163746	No Change	CP17A_ICTPU
g6418 TGMH_TACTR	-0.410318	0.0734517	-0.362816	0.0214034	No Change	TGMH_TACTR
g7216 RHG23_HUMAN	0.686784	0.0036586	-0.171586	0.254914	No Change	RHG23_HUMAN
g7738	-0.982632	0.000274348	0.752654	4.19589e-05	No Change
g8144 ZMYM5_BOVIN	-1.29138	0.539855	3.93491	0.00016465	No Change	ZMYM5_BOVIN
g9042 RTJK_DROME	-11.1482	1.80602e-11	0.0144732	0.965098	TCF Dependent	RTJK_DROME
g9063 FLVC2_HUMAN	-0.0557326	0.916323	-0.561566	0.0366375	No Change	FLVC2_HUMAN
g9693 CAS4_EPHMU	-1.76979	7.584e-05	0.212993	0.473466	TCF Dependent	CAS4_EPHMU
g9994 RS11_MAGSA	-1.18739	6.33902e-06	1.6855	1.28737e-12	No Change	RS11_MAGSA

## Sheet: Fig. 3E
ID	F8vFi8c0 LogFC	F8vFi8c0 FDR	Fi8vFi0 LogFC	Fi8vFi0 FDR	TCF Function	Swissprot Annotation
g10680 KCP4_PINMG	2.77175	5.00347e-11	4.68337	8.32484e-20	TCF Inhibited	KCP4_PINMG
g10950	-0.335121	0.362401	0.235225	0.351081	No Change
g10986	0.896797	1.78554e-06	1.39527	1.12595e-14	TCF Inhibited
g11444 ZSWM4_HUMAN	-0.382651	0.0732571	-1.34182	1.82056e-11	No Change	ZSWM4_HUMAN
g11470 ZSC31_HUMAN	1.05463	7.09635e-06	1.69324	3.79945e-14	TCF Inhibited	ZSC31_HUMAN
g1155 ABCG8_DICDI	-0.326314	0.29301	-0.652545	0.00208243	No Change	ABCG8_DICDI
g11745 MYPT1_CHICK	0.976798	0.000183002	0.791449	1.53957e-05	TCF Inhibited	MYPT1_CHICK
g11780 SP4_MOUSE	-0.744606	0.00130302	-1.0867	3.28248e-09	No Change	SP4_MOUSE
g11950 SIK2_MOUSE	1.41785	1.75604e-07	1.2673	1.43139e-09	TCF Inhibited	SIK2_MOUSE
g12223 MYLIP_RAT	1.14933	7.99454e-08	0.585568	1.22405e-05	TCF Inhibited	MYLIP_RAT
g12274 FRIZ2_CAEEL	-0.870825	0.00308205	0.0159278	0.942748	No Change	FRIZ2_CAEEL
g12371 RAP1B_XENTR	-1.45917	0.000318691	-1.65056	2.96974e-07	TCF Dependent	RAP1B_XENTR
g12567 SOX2_CHICK	-1.03059	0.0202178	-0.29843	0.363787	No Change	SOX2_CHICK
g12710 RAB12_MOUSE	2.9751	4.67392e-12	3.60316	3.8712e-18	TCF Inhibited	RAB12_MOUSE
g13587 PRLHR_RAT	2.87539	2.91091e-08	1.41484	1.27633e-05	TCF Inhibited	PRLHR_RAT
g13698 OPN4A_GADMO	-0.921121	0.0139649	-0.896309	0.00095376	No Change	OPN4A_GADMO
g13893 TTC28_MOUSE	-0.662372	0.0971869	-0.492523	0.076284	No Change	TTC28_MOUSE
g14018 POSTN_HUMAN	-4.93054	2.24408e-08	-6.02909	1.39038e-13	TCF Dependent	POSTN_HUMAN
g14048 DAPK2_HUMAN	0.88394	0.00104087	1.4611	3.70113e-10	No Change	DAPK2_HUMAN
g14229 GREM2_HUMAN	-0.941239	8.55537e-05	-1.21388	4.4737e-10	TCF Dependent	GREM2_HUMAN
g14470 MMP14_MOUSE	-2.44617	1.01581e-05	1.08468	0.000420867	No Change	MMP14_MOUSE
g1450 JUN_CHICK	2.02011	4.20879e-10	1.85522	2.55769e-13	TCF Inhibited	JUN_CHICK
g14685 SPY2_BOVIN	1.6328	3.63362e-09	1.06918	4.50581e-09	TCF Inhibited	SPY2_BOVIN
g14938 AXIN1_HUMAN	-0.976508	1.90901e-06	-0.496167	0.000207312	TCF Dependent	AXIN1_HUMAN
g15226 ARX_RAT	-1.26448	8.03924e-06	-1.53197	7.41085e-11	TCF Dependent	ARX_RAT
g15494 VWDE_HUMAN	1.92028	5.7134e-09	2.39104	2.81473e-15	TCF Inhibited	VWDE_HUMAN
g15655 FEZF2_BOVIN	0.419208	0.268526	-0.343622	0.174641	No Change	FEZF2_BOVIN
g15679	1.2565	1.47905e-06	1.22427	1.42444e-09	TCF Inhibited
g15894 DUT_RHILW	0.926115	0.086723	3.15823	1.42093e-11	No Change	DUT_RHILW
g1591 ROR1_HUMAN	-0.747495	0.000539613	-1.03247	8.19493e-09	TCF Dependent	ROR1_HUMAN
g15913 KCNK9_XENLA	0.511774	0.466909	1.41555	0.00236601	No Change	KCNK9_XENLA
g16165 ZIC4_MOUSE	-1.49392	0.11945	-0.352008	0.615911	No Change	ZIC4_MOUSE
g16491 CREB_HYDVD	1.33481	1.01584e-07	1.55962	3.57866e-13	TCF Inhibited	CREB_HYDVD
g1705 ANR44_HUMAN	-0.964896	0.000862681	-0.0860918	0.675958	TCF Dependent	ANR44_HUMAN
g1708 LOXH1_MOUSE	-1.24405	0.000444479	-1.28166	1.26478e-06	TCF Dependent	LOXH1_MOUSE
g17392 SAXO1_MACFA	0.392515	0.248286	-0.0738485	0.775356	No Change	SAXO1_MACFA
g18200 RIT2_HUMAN	1.84807	1.67296e-09	1.63539	1.24344e-12	TCF Inhibited	RIT2_HUMAN
g18245 DLLH_BRAFL	-0.481908	0.144974	-0.60125	0.00738461	No Change	DLLH_BRAFL
g18475 FORF_DICDI	-1.52857	2.21991e-05	-1.37814	2.78473e-07	TCF Dependent	FORF_DICDI
g18477 FORF_DICDI	-0.219423	0.509016	-0.725578	0.00147048	No Change	FORF_DICDI
g18779 NPY4R_MOUSE	-1.22815	0.30671	-2.75912	0.00182951	No Change	NPY4R_MOUSE
g18842 WLS_MOUSE	1.1166	0.000291212	3.79733	8.92325e-20	TCF Inhibited	WLS_MOUSE
g19105	1.57536	0.224684	1.44367	0.144554	No Change
g19253 CALB2_RAT	0.154698	0.564034	-0.553649	0.00183556	No Change	CALB2_RAT
g19768 RASS_DICDI	2.85854	1.93351e-11	3.41546	2.98071e-17	TCF Inhibited	RASS_DICDI
g19890	3.78844	4.01286e-08	3.16294	1.46765e-09	TCF Inhibited
g20391 SF3A2_RAT	-0.150164	0.452951	-0.148432	0.254076	No Change	SF3A2_RAT
g20504 LIN41_CHICK	0.677871	0.000933911	0.428428	0.00129591	TCF Inhibited	LIN41_CHICK
g20613	0.888732	0.0660341	0.775358	0.026521	No Change
g2068	1.41583	1.31139e-05	1.24669	1.92207e-07	TCF Inhibited
g20911 GATA2_XENLA	-1.12682	0.000710775	-1.78236	3.1634e-10	TCF Dependent	GATA2_XENLA
g21006 ASPG_DIRIM	0.261318	0.199922	0.388137	0.00495309	No Change	ASPG_DIRIM
g21076 KIBRA_XENTR	0.102002	0.601483	-0.250991	0.0388056	No Change	KIBRA_XENTR
g21163	-1.93785	5.37339e-08	-1.27636	3.44766e-07	TCF Dependent
g21761 DMRT2_HUMAN	-0.272681	0.76378	-1.72723	0.00126501	No Change	DMRT2_HUMAN
g2198 K1958_HUMAN	-1.36927	0.506829	-2.24789	0.182005	No Change	K1958_HUMAN
g22114	1.8406	6.01644e-10	3.57958	2.20849e-21	TCF Inhibited
g22319 KDIS_DANRE	-0.785344	9.01169e-05	-0.97247	1.48468e-09	TCF Dependent	KDIS_DANRE
g22869	-0.500394	0.0198337	-1.1905	3.60124e-10	No Change
g22934	3.39801	1.93351e-11	4.9357	4.63418e-20	TCF Inhibited
g22965	-0.121213	0.456289	-0.213974	0.0399489	No Change
g23256 MFSD8_MOUSE	-0.120717	0.680124	-0.171044	0.356841	No Change	MFSD8_MOUSE
g23270 FSHR_CAIMO	0.409675	0.0143601	-0.121155	0.288379	No Change	FSHR_CAIMO
g23421 IABF_STRAW	3.16672	1.50653e-08	5.70835	8.32484e-20	TCF Inhibited	IABF_STRAW
g23571	1.15119	4.85757e-08	1.18487	2.72984e-12	TCF Inhibited
g23588 TRAF4_MOUSE	0.592384	0.117076	-0.172598	0.528088	No Change	TRAF4_MOUSE
g23859 VILI_CHICK	0.800621	0.0196191	-0.417897	0.0789278	No Change	VILI_CHICK
g23916	0.00485603	0.99421	1.2087	1.32368e-05	No Change
g24114 OTX2_XENTR	-2.88522	1.7847e-12	-2.56877	3.19711e-15	TCF Dependent	OTX2_XENTR
g24126 FOXA2_ORYLA	-0.98192	5.52228e-05	-1.20203	9.49331e-10	TCF Dependent	FOXA2_ORYLA
g24191 FA5_BOVIN	0.426176	0.633015	2.52931	4.20254e-05	No Change	FA5_BOVIN
g24483 DCC_MOUSE	0.583464	0.0372057	-0.0160626	0.943524	No Change	DCC_MOUSE
g24647	0.391287	0.212947	0.0382081	0.882626	No Change
g24911	-0.343158	0.0749827	0.306147	0.0193631	No Change
g24936 PSD10_DICDI	-4.22012	1.80403e-12	-4.40115	2.30628e-16	TCF Dependent	PSD10_DICDI
g24952 BRAC_HUMAN	1.09115	0.0121828	3.02368	3.89376e-12	No Change	BRAC_HUMAN
g25044	2.04695	8.05047e-07	3.04023	9.72091e-15	TCF Inhibited
g25176 SQSTM_PONAB	2.32719	3.10816e-16	3.35137	8.33796e-25	TCF Inhibited	SQSTM_PONAB
g25284 PRDM6_MOUSE	-0.364757	0.0171502	-0.550344	2.08181e-06	No Change	PRDM6_MOUSE
g25564	0.705801	0.190492	1.49689	3.29453e-06	No Change
g25893	4.98193	1.84549e-08	3.71732	2.14565e-10	TCF Inhibited
g26393	-1.17917	0.00603696	-1.49971	1.90802e-05	No Change
g26748	1.36835	0.0342605	1.32463	0.00424627	No Change
g26840 ZN703_XENTR	0.341501	0.316375	0.0447561	0.863413	No Change	ZN703_XENTR
g26858 DRD1_XENLA	-0.258396	0.402096	1.12708	6.97465e-07	No Change	DRD1_XENLA
g27008 ASAH1_MOUSE	1.12648	3.10039e-07	0.563105	3.91477e-05	TCF Inhibited	ASAH1_MOUSE
g27164 FLNA_HUMAN	-0.0994894	0.607747	0.184311	0.124029	No Change	FLNA_HUMAN
g27334 GLNA_PANAR	1.65789	0.000864228	2.26809	5.11129e-08	TCF Inhibited	GLNA_PANAR
g27364 PANG1_DROME	-0.0886985	0.668836	0.31938	0.0117388	No Change	PANG1_DROME
g27778 LAMC_DROME	0.392167	0.404015	0.018129	0.96042	No Change	LAMC_DROME
g27807 GBRB1_MOUSE	0.576196	0.188921	-0.0362614	0.915295	No Change	GBRB1_MOUSE
g27891 FZD4_RAT	-0.750867	1.30875e-05	-0.840196	8.05772e-10	TCF Dependent	FZD4_RAT
g28042 ARHB_XENLA	-2.72259	1.2688e-12	-2.33055	1.76371e-15	TCF Dependent	ARHB_XENLA
g28064 WNT3_MOUSE	2.62447	9.64198e-11	3.3371	4.64586e-18	TCF Inhibited	WNT3_MOUSE
g28166 PFI_PTIFI	-2.35424	6.55744e-08	0.12947	0.609983	No Change	PFI_PTIFI
g28449 FD4_DROME	-1.01502	0.038825	-1.51773	0.000129848	No Change	FD4_DROME
g28700 MPRG_HUMAN	-2.11489	2.54422e-05	-1.96385	5.7036e-07	TCF Dependent	MPRG_HUMAN
g28717	3.48589	5.01811e-08	5.35387	2.30628e-16	TCF Inhibited
g28791	8.42612	4.82576e-10	9.56831	2.98071e-17	TCF Inhibited
g28992 EGL4_CAEEL	0.173707	0.563485	0.785473	0.000115597	No Change	EGL4_CAEEL
g29030 MTPN_RAT	0.409799	0.296572	-0.8374	0.00133881	No Change	MTPN_RAT
g29161 NANO1_DANRE	-0.868323	0.0345864	-0.254713	0.39776	No Change	NANO1_DANRE
g29234 SH3R1_XENTR	-0.274821	0.14888	0.711046	1.02928e-06	No Change	SH3R1_XENTR
g29352	1.42416	0.000731223	0.587787	0.0368147	TCF Inhibited
g29387 CAS4_EPHMU	1.75546	0.00113216	1.53726	6.3498e-05	No Change	CAS4_EPHMU
g29412 ECE1_CAVPO	-1.05451	4.31312e-05	-1.19635	7.90411e-09	TCF Dependent	ECE1_CAVPO
g29781 DVL2_XENTR	-0.136483	0.540029	0.0691285	0.660949	No Change	DVL2_XENTR
g30252	0.958934	0.0243831	0.525011	0.0818142	No Change
g30386 VENT1_XENTR	-1.83452	0.00933783	-0.805674	0.105085	No Change	VENT1_XENTR
g30442	0.624126	0.0144407	1.14449	4.17872e-08	No Change
g30478 SMAD4_PIG	-0.6446	0.000619397	-0.64802	2.39378e-06	TCF Dependent	SMAD4_PIG
g30573 HLDE_SHESA	2.72044	2.89083e-08	2.66949	5.371e-11	TCF Inhibited	HLDE_SHESA
g30660 SNX11_MOUSE	-1.57021	8.32705e-08	-1.1156	2.05632e-08	TCF Dependent	SNX11_MOUSE
g30865 PXDN_DROME	-0.897061	0.0151512	-0.206077	0.449423	No Change	PXDN_DROME
g31440 NPYR_DROME	-1.44453	4.72575e-06	-1.35902	2.60312e-08	TCF Dependent	NPYR_DROME
g31954 NKX25_XENLA	-2.49931	0.000851564	-2.2992	5.42744e-05	TCF Dependent	NKX25_XENLA
g32238	-0.375595	0.264544	2.20473	2.74409e-12	No Change
g32669	-0.384927	0.42184	-0.837019	0.00962241	No Change
g32877 BMP7_MOUSE	1.02273	7.07936e-06	1.21181	5.99482e-11	TCF Inhibited	BMP7_MOUSE
g32919	-1.91229	0.00011613	-3.18122	3.27281e-11	TCF Dependent
g33373 WNT7B_HUMAN	2.7661	0.000305493	2.54292	1.97607e-07	TCF Inhibited	WNT7B_HUMAN
g33422 SP4_MOUSE	1.26606	1.57254e-07	0.62782	2.74822e-05	TCF Inhibited	SP4_MOUSE
g33581	3.31755	9.45512e-13	4.38581	4.45024e-20	TCF Inhibited
g33661 CPEB1_PONAB	2.34047	3.10816e-16	1.2048	9.82653e-14	TCF Inhibited	CPEB1_PONAB
g33690 RTJK_DROME	-1.30126	0.00148267	-1.55945	1.0894e-06	No Change	RTJK_DROME
g3553 PHNX_SYNFM	0.922321	4.16101e-05	0.207683	0.1358	TCF Inhibited	PHNX_SYNFM
g3694	0.0255357	0.963095	-0.306751	0.330279	No Change
g3847 DMTA2_XENTR	-1.89971	3.23682e-12	-1.27106	2.35464e-12	TCF Dependent	DMTA2_XENTR
g4024	0.870588	0.00475364	0.313114	0.12297	No Change
g4416	-0.75982	0.422351	-1.17729	0.070374	No Change
g4715	3.24392	3.27279e-11	3.03271	8.02937e-16	TCF Inhibited
g4917 TLD_DROME	-1.94651	0.000200347	-2.44543	2.25635e-08	TCF Dependent	TLD_DROME
g5003 GAPR1_HUMAN	-0.291641	0.205983	-0.00640784	0.970684	No Change	GAPR1_HUMAN
g5147	0.235558	0.667963	0.0029022	0.994508	No Change
g5250	-0.542847	0.572779	-0.739533	0.270219	No Change
g5410	-0.47746	0.0802823	0.424315	0.0175566	No Change
g5411	3.73065	4.45356e-11	3.25035	4.2023e-14	TCF Inhibited
g5455	1.90366	7.54853e-08	1.85012	1.054e-11	TCF Inhibited
g556	-1.22745	9.1143e-07	-1.18113	1.38519e-09	TCF Dependent
g5621 PITX1_XENLA	-2.45972	6.02924e-06	-2.0292	7.11936e-07	TCF Dependent	PITX1_XENLA
g5735 RHG06_MOUSE	-2.26501	1.87401e-11	-2.53314	6.44947e-17	TCF Dependent	RHG06_MOUSE
g5882 SAL_SILAS	1.6017	2.3956e-09	2.74156	1.98717e-19	TCF Inhibited	SAL_SILAS
g5987	-1.09813	0.0190979	-1.16453	0.000953207	No Change
g5995 MKNK1_MOUSE	0.574221	0.023739	-0.107759	0.560191	No Change	MKNK1_MOUSE
g6131 CP17A_ICTPU	0.583004	0.364698	1.38777	0.00230914	No Change	CP17A_ICTPU
g6418 TGMH_TACTR	0.812756	0.00133306	0.0483555	0.801638	No Change	TGMH_TACTR
g7216 RHG23_HUMAN	-0.50226	0.0330867	-0.363081	0.0266307	No Change	RHG23_HUMAN
g7738	0.753856	0.00289961	1.0422	1.35209e-07	No Change
g8144 ZMYM5_BOVIN	0.532326	0.716347	1.46109	0.186021	No Change	ZMYM5_BOVIN
g9042 RTJK_DROME	0.848274	0.103721	0.60194	0.036564	No Change	RTJK_DROME
g9063 FLVC2_HUMAN	0.127413	0.798547	1.16198	7.92772e-05	No Change	FLVC2_HUMAN
g9693 CAS4_EPHMU	0.0416587	0.936704	0.288693	0.331688	No Change	CAS4_EPHMU
g9994 RS11_MAGSA	0.635684	0.00855663	0.172893	0.286115	No Change	RS11_MAGSA

## Sheet: Fig. 3F
ID	F12vFi12c0 LogFC	F12vFi12c0 FDR	Fi12vFi0 LogFC	Fi12vFi0 FDR	TCF Function	Swissprot Annotation
g10680 KCP4_PINMG	2.08555	1.55085e-08	5.37733	4.29961e-21	TCF Inhibited	KCP4_PINMG
g10950	-0.335891	0.354536	0.196737	0.419777	No Change
g10986	0.948035	5.59945e-07	1.61911	1.84818e-16	TCF Inhibited
g11444 ZSWM4_HUMAN	-0.855587	0.000525558	-2.02665	4.03811e-15	TCF Dependent	ZSWM4_HUMAN
g11470 ZSC31_HUMAN	1.03988	7.70828e-06	1.67678	4.7697e-14	TCF Inhibited	ZSC31_HUMAN
g1155 ABCG8_DICDI	-0.737934	0.0159253	-1.23156	5.11863e-07	No Change	ABCG8_DICDI
g11745 MYPT1_CHICK	1.17516	3.02069e-05	-0.111701	0.496516	No Change	MYPT1_CHICK
g11780 SP4_MOUSE	-2.79635	1.04874e-14	-1.03582	1.11771e-08	TCF Dependent	SP4_MOUSE
g11950 SIK2_MOUSE	0.986906	5.6401e-05	0.904831	9.08452e-07	TCF Inhibited	SIK2_MOUSE
g12223 MYLIP_RAT	0.617237	0.000768383	0.247957	0.0340851	No Change	MYLIP_RAT
g12274 FRIZ2_CAEEL	-0.167642	0.593468	0.340299	0.0644755	No Change	FRIZ2_CAEEL
g12371 RAP1B_XENTR	-1.82707	9.3573e-06	-1.21968	2.42598e-05	TCF Dependent	RAP1B_XENTR
g12567 SOX2_CHICK	-0.269472	0.559108	0.138846	0.658223	No Change	SOX2_CHICK
g12710 RAB12_MOUSE	2.27732	1.61731e-09	3.22624	3.71401e-17	TCF Inhibited	RAB12_MOUSE
g13587 PRLHR_RAT	1.29328	0.00354411	0.0712855	0.831918	No Change	PRLHR_RAT
g13698 OPN4A_GADMO	-1.44817	0.000199087	-0.596737	0.020023	TCF Dependent	OPN4A_GADMO
g13893 TTC28_MOUSE	-0.270731	0.50197	-1.01324	0.000256049	No Change	TTC28_MOUSE
g14018 POSTN_HUMAN	-3.61029	7.66053e-08	-3.16395	1.61543e-09	TCF Dependent	POSTN_HUMAN
g14048 DAPK2_HUMAN	0.760779	0.00363882	1.03002	5.05891e-07	No Change	DAPK2_HUMAN
g14229 GREM2_HUMAN	-1.05353	2.98369e-05	-1.78809	8.31126e-14	TCF Dependent	GREM2_HUMAN
g14470 MMP14_MOUSE	-2.3192	2.35515e-05	0.942787	0.00160878	No Change	MMP14_MOUSE
g1450 JUN_CHICK	1.43541	4.87063e-07	1.02764	7.49973e-08	TCF Inhibited	JUN_CHICK
g14685 SPY2_BOVIN	1.19406	2.70403e-06	0.744832	4.85523e-06	TCF Inhibited	SPY2_BOVIN
g14938 AXIN1_HUMAN	-0.285568	0.0967791	-0.213097	0.0600705	No Change	AXIN1_HUMAN
g15226 ARX_RAT	-1.48048	5.97524e-07	-1.7082	9.35461e-12	TCF Dependent	ARX_RAT
g15494 VWDE_HUMAN	1.85474	1.9192e-08	1.94626	5.37811e-13	TCF Inhibited	VWDE_HUMAN
g15655 FEZF2_BOVIN	-0.780853	0.0370094	-1.45299	9.26072e-07	No Change	FEZF2_BOVIN
g15679	1.00231	3.22047e-05	0.753528	5.95314e-06	TCF Inhibited
g15894 DUT_RHILW	-0.120151	0.839699	3.36484	3.20698e-12	No Change	DUT_RHILW
g1591 ROR1_HUMAN	-0.512351	0.0114466	-1.22664	2.90858e-11	No Change	ROR1_HUMAN
g15913 KCNK9_XENLA	1.17673	0.0717026	1.96493	2.74083e-05	No Change	KCNK9_XENLA
g16165 ZIC4_MOUSE	-2.02906	0.0479241	-1.16657	0.106486	No Change	ZIC4_MOUSE
g16491 CREB_HYDVD	1.19577	1.17582e-06	1.32898	8.43474e-12	TCF Inhibited	CREB_HYDVD
g1705 ANR44_HUMAN	-0.0436935	0.894759	0.497663	0.00658131	No Change	ANR44_HUMAN
g1708 LOXH1_MOUSE	-1.48112	7.49629e-05	-1.73898	1.31757e-08	TCF Dependent	LOXH1_MOUSE
g17392 SAXO1_MACFA	-0.531866	0.0914947	-0.670426	0.00168446	No Change	SAXO1_MACFA
g18200 RIT2_HUMAN	1.0258	5.25017e-05	1.50777	8.79389e-12	TCF Inhibited	RIT2_HUMAN
g18245 DLLH_BRAFL	-1.28451	0.000137076	0.0888059	0.697574	TCF Dependent	DLLH_BRAFL
g18475 FORF_DICDI	-1.59382	1.54399e-05	-1.35446	4.74182e-07	TCF Dependent	FORF_DICDI
g18477 FORF_DICDI	-0.376997	0.235119	-1.3214	2.67272e-07	No Change	FORF_DICDI
g18779 NPY4R_MOUSE	-2.80456	0.00725256	-1.64804	0.0397333	No Change	NPY4R_MOUSE
g18842 WLS_MOUSE	3.34795	1.72634e-13	4.67616	4.51509e-22	TCF Inhibited	WLS_MOUSE
g19105	7.75327	0.000237058	1.46321	0.1245	TCF Inhibited
g19253 CALB2_RAT	-0.655465	0.00811299	-0.829521	4.57945e-06	No Change	CALB2_RAT
g19768 RASS_DICDI	2.26252	2.4414e-09	3.02779	4.90612e-16	TCF Inhibited	RASS_DICDI
g19890	3.16462	1.69679e-06	2.28411	1.1779e-06	TCF Inhibited
g20391 SF3A2_RAT	-0.17805	0.363681	0.301964	0.0171662	No Change	SF3A2_RAT
g20504 LIN41_CHICK	-0.053894	0.809726	0.027594	0.845891	No Change	LIN41_CHICK
g20613	1.38485	0.00486197	0.486062	0.143396	No Change
g2068	1.32667	2.47684e-05	0.732778	0.000225617	TCF Inhibited
g20911 GATA2_XENLA	-2.16368	2.0124e-08	-1.49391	2.07807e-08	TCF Dependent	GATA2_XENLA
g21006 ASPG_DIRIM	-0.476645	0.0168123	-0.74884	1.23882e-06	No Change	ASPG_DIRIM
g21076 KIBRA_XENTR	0.313472	0.0717196	0.143252	0.214558	No Change	KIBRA_XENTR
g21163	-0.960345	0.00167248	-0.568741	0.00579602	No Change
g21761 DMRT2_HUMAN	-1.87021	0.0506809	-3.02162	2.40314e-05	No Change	DMRT2_HUMAN
g2198 K1958_HUMAN	-7.69608	0.00187677	-3.97096	0.0697583	No Change	K1958_HUMAN
g22114	1.86467	4.37157e-10	3.42778	4.0775e-21	TCF Inhibited
g22319 KDIS_DANRE	-1.34824	8.19392e-09	-1.09885	1.66412e-10	TCF Dependent	KDIS_DANRE
g22869	-0.532099	0.0114678	-0.681519	1.37681e-05	No Change
g22934	2.9218	3.7835e-10	4.83581	3.92756e-20	TCF Inhibited
g22965	-0.0557885	0.749567	-0.243943	0.0166748	No Change
g23256 MFSD8_MOUSE	-0.808532	0.00243852	-0.932713	2.77515e-06	No Change	MFSD8_MOUSE
g23270 FSHR_CAIMO	0.123068	0.479459	-0.461013	9.6383e-05	No Change	FSHR_CAIMO
g23421 IABF_STRAW	4.03412	1.83515e-10	6.30944	5.38081e-21	TCF Inhibited	IABF_STRAW
g23571	0.152481	0.404607	0.355685	0.00298182	No Change
g23588 TRAF4_MOUSE	-0.096839	0.819391	-0.730168	0.00243051	No Change	TRAF4_MOUSE
g23859 VILI_CHICK	-0.221891	0.538606	-1.35432	3.74067e-07	No Change	VILI_CHICK
g23916	-0.977354	0.00692656	1.54592	5.32345e-08	No Change
g24114 OTX2_XENTR	-1.88233	9.36703e-09	-1.56288	7.15818e-11	TCF Dependent	OTX2_XENTR
g24126 FOXA2_ORYLA	-1.1878	2.42901e-06	-0.989377	5.68794e-08	TCF Dependent	FOXA2_ORYLA
g24191 FA5_BOVIN	0.775333	0.374466	2.26257	0.000206321	No Change	FA5_BOVIN
g24483 DCC_MOUSE	-0.307481	0.258427	-0.564047	0.00197112	No Change	DCC_MOUSE
g24647	0.668561	0.0317229	-0.283751	0.164903	No Change
g24911	-0.281657	0.131933	0.390579	0.0020792	No Change
g24936 PSD10_DICDI	-3.69895	5.75095e-11	-4.23585	1.33683e-16	TCF Dependent	PSD10_DICDI
g24952 BRAC_HUMAN	2.20862	1.01505e-05	2.91291	1.41529e-11	TCF Inhibited	BRAC_HUMAN
g25044	1.34633	0.00028418	2.78217	4.83758e-14	TCF Inhibited
g25176 SQSTM_PONAB	2.37264	1.62133e-16	3.34639	8.81112e-25	TCF Inhibited	SQSTM_PONAB
g25284 PRDM6_MOUSE	-0.437805	0.00460843	-0.423831	8.23124e-05	No Change	PRDM6_MOUSE
g25564	-1.312	0.00711776	1.51737	1.4065e-06	No Change
g25893	2.61406	0.000163998	2.13228	1.92378e-06	TCF Inhibited
g26393	-1.00591	0.0129767	-1.17461	0.000102973	No Change
g26748	1.4124	0.0299994	1.15628	0.0113345	No Change
g26840 ZN703_XENTR	-0.579358	0.110527	-1.19617	1.73219e-05	No Change	ZN703_XENTR
g26858 DRD1_XENLA	0.393507	0.18476	1.58931	4.64377e-10	No Change	DRD1_XENLA
g27008 ASAH1_MOUSE	0.432518	0.0222225	0.321284	0.0117464	No Change	ASAH1_MOUSE
g27164 FLNA_HUMAN	0.262572	0.13514	0.401012	0.000896091	No Change	FLNA_HUMAN
g27334 GLNA_PANAR	1.32938	0.0039903	2.81642	3.78569e-10	No Change	GLNA_PANAR
g27364 PANG1_DROME	-0.0495309	0.818506	0.490005	0.000177039	No Change	PANG1_DROME
g27778 LAMC_DROME	-0.226047	0.630595	-0.869126	0.00257118	No Change	LAMC_DROME
g27807 GBRB1_MOUSE	-0.770607	0.0858131	-1.30569	7.75977e-05	No Change	GBRB1_MOUSE
g27891 FZD4_RAT	-0.600148	0.000265444	-0.599469	5.86956e-07	TCF Dependent	FZD4_RAT
g28042 ARHB_XENLA	-3.83596	2.61359e-15	-3.41191	1.76933e-18	TCF Dependent	ARHB_XENLA
g28064 WNT3_MOUSE	3.06791	3.45224e-12	3.76939	1.58282e-19	TCF Inhibited	WNT3_MOUSE
g28166 PFI_PTIFI	-1.71775	1.6053e-05	0.776941	0.000901476	No Change	PFI_PTIFI
g28449 FD4_DROME	-2.09199	1.95316e-05	-0.914005	0.00545209	TCF Dependent	FD4_DROME
g28700 MPRG_HUMAN	-0.972345	0.0247715	-1.15752	0.000261527	No Change	MPRG_HUMAN
g28717	3.53281	3.60847e-08	5.70084	4.07042e-17	TCF Inhibited
g28791	9.04889	1.22811e-10	9.92456	5.52472e-18	TCF Inhibited
g28992 EGL4_CAEEL	0.00891123	0.978308	0.257663	0.152441	No Change	EGL4_CAEEL
g29030 MTPN_RAT	-0.284992	0.480368	-1.12174	4.32324e-05	No Change	MTPN_RAT
g29161 NANO1_DANRE	0.0615832	0.897422	0.229969	0.388783	No Change	NANO1_DANRE
g29234 SH3R1_XENTR	-0.583065	0.00241161	0.598515	1.36477e-05	No Change	SH3R1_XENTR
g29352	0.755919	0.0567033	-0.196203	0.477295	No Change
g29387 CAS4_EPHMU	1.1569	0.0306208	0.953096	0.0110923	No Change	CAS4_EPHMU
g29412 ECE1_CAVPO	-1.34334	5.64941e-07	-1.19579	3.65461e-09	TCF Dependent	ECE1_CAVPO
g29781 DVL2_XENTR	-0.430454	0.0320714	-0.0964663	0.480285	No Change	DVL2_XENTR
g30252	0.610369	0.127334	0.0537632	0.857875	No Change
g30386 VENT1_XENTR	-2.34521	0.00190391	-1.44765	0.00794924	No Change	VENT1_XENTR
g30442	1.22836	8.99675e-06	1.33404	1.08354e-09	TCF Inhibited
g30478 SMAD4_PIG	-0.768283	0.000109147	-0.885298	2.81219e-08	TCF Dependent	SMAD4_PIG
g30573 HLDE_SHESA	3.1686	1.61101e-09	2.14464	5.13651e-09	TCF Inhibited	HLDE_SHESA
g30660 SNX11_MOUSE	-1.85277	2.53966e-09	-0.839208	3.6024e-06	TCF Dependent	SNX11_MOUSE
g30865 PXDN_DROME	0.242275	0.510987	0.410696	0.0756485	No Change	PXDN_DROME
g31440 NPYR_DROME	-1.13573	0.000111662	-0.611543	0.00125903	TCF Dependent	NPYR_DROME
g31954 NKX25_XENLA	-1.72548	0.00665519	0.0324007	0.949412	No Change	NKX25_XENLA
g32238	-0.0784306	0.833602	2.15126	3.64939e-12	No Change
g32669	-1.58673	0.00112741	-1.4638	6.93438e-05	No Change
g32877 BMP7_MOUSE	0.0282684	0.908358	0.897529	5.46926e-08	No Change	BMP7_MOUSE
g32919	-2.43708	1.34476e-06	-2.74665	3.35409e-10	TCF Dependent
g33373 WNT7B_HUMAN	0.469159	0.61691	-0.167019	0.791897	No Change	WNT7B_HUMAN
g33422 SP4_MOUSE	0.55762	0.00861836	-0.631446	3.57454e-05	No Change	SP4_MOUSE
g33581	2.27972	2.75798e-09	3.36606	1.15381e-17	TCF Inhibited
g33661 CPEB1_PONAB	1.0502	3.29252e-08	0.223763	0.0281334	No Change	CPEB1_PONAB
g33690 RTJK_DROME	0.0184582	0.969532	-1.16242	7.76179e-05	No Change	RTJK_DROME
g3553 PHNX_SYNFM	0.0804649	0.726295	0.00177597	0.990689	No Change	PHNX_SYNFM
g3694	-0.788912	0.0570852	-1.22325	4.48677e-05	No Change
g3847 DMTA2_XENTR	-1.88442	4.40553e-12	-0.815012	5.16751e-08	TCF Dependent	DMTA2_XENTR
g4024	1.39909	3.01686e-05	0.508242	0.0110923	TCF Inhibited
g4416	-0.197876	0.891876	-3.2307	0.000166647	No Change
g4715	2.59566	2.7148e-09	2.39383	6.50102e-14	TCF Inhibited
g4917 TLD_DROME	-3.47641	1.24873e-09	-1.97743	8.60244e-08	TCF Dependent	TLD_DROME
g5003 GAPR1_HUMAN	-0.583594	0.0098986	0.168381	0.262068	No Change	GAPR1_HUMAN
g5147	0.491979	0.370159	-0.300261	0.394812	No Change
g5250	0.0129144	0.997131	-0.983438	0.141394	No Change
g5410	0.0169427	0.958303	1.08586	8.401e-08	No Change
g5411	3.50381	1.33656e-10	3.2213	2.7926e-14	TCF Inhibited
g5455	1.65759	1.15001e-06	1.64182	1.88983e-10	TCF Inhibited
g556	-1.59869	3.68339e-09	-1.13645	9.62717e-10	TCF Dependent
g5621 PITX1_XENLA	-2.18751	2.23262e-05	-1.82984	1.61727e-06	TCF Dependent	PITX1_XENLA
g5735 RHG06_MOUSE	-2.10676	7.16204e-11	-1.90035	5.03238e-14	TCF Dependent	RHG06_MOUSE
g5882 SAL_SILAS	1.82108	7.67299e-11	3.13311	3.137e-21	TCF Inhibited	SAL_SILAS
g5987	-0.282233	0.556115	-1.49198	1.99877e-05	No Change
g5995 MKNK1_MOUSE	-0.319638	0.227865	-1.15372	1.18698e-07	No Change	MKNK1_MOUSE
g6131 CP17A_ICTPU	0.720237	0.268809	0.894484	0.0444021	No Change	CP17A_ICTPU
g6418 TGMH_TACTR	0.0752651	0.782476	-0.633249	0.000161703	No Change	TGMH_TACTR
g7216 RHG23_HUMAN	-0.112435	0.649681	0.105591	0.497473	No Change	RHG23_HUMAN
g7738	0.47436	0.0489658	1.34281	5.61563e-10	No Change
g8144 ZMYM5_BOVIN	2.41824	0.127039	1.04766	0.387424	No Change	ZMYM5_BOVIN
g9042 RTJK_DROME	-1.86744	0.00018294	0.913636	0.0018632	No Change	RTJK_DROME
g9063 FLVC2_HUMAN	-1.06329	0.0112581	0.933519	0.00092706	No Change	FLVC2_HUMAN
g9693 CAS4_EPHMU	0.22047	0.655919	-0.0293277	0.934275	No Change	CAS4_EPHMU
g9994 RS11_MAGSA	0.333409	0.183188	-0.326117	0.0501005	No Change	RS11_MAGSA

## Sheet: Fig. 3G
Gene ID	Swissprot Annotation	Foot Reg logFC	Head Reg logFC	Structural Enrichment
g10006	NA	2.04598	0.929742	Not Interesting
g10008	sp|A6QPH9|ZMYM5_BOVIN	2.03946	1.69534	Not Interesting
g10018	sp|Q4I963|COFI_GIBZE	-0.732334	0.031224	Not Interesting
g10020	sp|P70057|KCNQ1_XENLA	-1.179	-1.05664	Not Interesting
g10022	sp|Q91W67|UBL7_MOUSE	0.468444	0.369905	Not Interesting
g10029	sp|Q6ZMW2|ZN782_HUMAN	-0.573253	-0.864175	Not Interesting
g1003	NA	0.887521	0.541681	Not Interesting
g10044	NA	0.318222	-0.722435	Not Interesting
g10045	sp|P61765|STXB1_RAT	0.621112	0.827723	Not Interesting
g10056	sp|P0CJ14|VP302_LYCMC	8.52802	9.82224	Not Interesting
g10085	sp|O96006|ZBED1_HUMAN	1.44972	0.310584	Not Interesting
g10117	NA	0.350268	0.35368	Not Interesting
g10121	sp|Q8IS44|DRD2L_DROME	-1.37851	-1.68753	Not Interesting
g10124	sp|P29540|T2EB_XENLA	0.693945	0.07687	Not Interesting
g10126	NA	-0.44799	-1.08534	Not Interesting
g10131	sp|Q9CY57|CHTOP_MOUSE	0.660683	-0.0570368	Not Interesting
g10133	sp|Q9VB25|KL98A_DROME	0.418952	1.04503	Not Interesting
g10141	sp|Q9BXW6|OSBL1_HUMAN	-1.14658	-0.0991248	Not Interesting
g10144	sp|Q9H0R3|TM222_HUMAN	-0.208608	-0.46159	Not Interesting
g10146	sp|Q3U0J8|TBD2B_MOUSE	-0.97361	-0.329282	Not Interesting
g10148	sp|Q9BYX2|TBD2A_HUMAN	-0.71069	-0.2523	Not Interesting
g10150	sp|Q9R0M5|TPK1_MOUSE	1.03414	-0.13229	Not Interesting
g10166	sp|B8V7R6|COA_ACRMI	-0.0236569	-0.612992	Not Interesting
g1017	sp|B8VIW9|FP_ACRMI	-0.794266	-0.113007	Not Interesting
g10230	sp|Q9Y493|ZAN_HUMAN	-1.66194	0.00873636	Not Interesting
g10232	NA	-0.890405	2.14787	Not Interesting
g10239	sp|Q8CG19|LTBP1_MOUSE	-0.513286	-0.431516	Not Interesting
g10240	sp|Q96WV6|YHU2_SCHPO	-1.1671	-0.56623	Not Interesting
g10249	sp|Q96WV6|YHU2_SCHPO	-0.840417	-0.818553	Not Interesting
g1025	NA	-0.480013	-0.604305	Not Interesting
g10273	sp|Q6AXJ7|F199X_DANRE	0.73447	0.121135	Not Interesting
g10292	sp|Q64487|PTPRD_MOUSE	0.960736	0.170507	Not Interesting
g10298	sp|Q76KP1|B4GN4_HUMAN	-1.79388	-1.75672	Not Interesting
g10300	sp|Q76KP1|B4GN4_HUMAN	4.55664	2.93627	Not Interesting
g1032	NA	1.47656	0.586444	Not Interesting
g10324	sp|Q8BG95|MYPT2_MOUSE	-0.376345	-0.404833	Not Interesting
g10325	NA	-0.132262	-0.571218	Not Interesting
g10332	sp|J9VXM5|CHS3_CRYNH	-0.369864	-0.294568	Not Interesting
g10338	sp|A2AVA0|SVEP1_MOUSE	-1.18185	-1.09743	Not Interesting
g10344	sp|Q4LDE5|SVEP1_HUMAN	-0.97133	-0.423862	Not Interesting
g10348	NA	-4.82612	-0.11466	Not Interesting
g10351	sp|Q9QUN9|DKK3_MOUSE	-0.616775	-0.396675	Not Interesting
g10366	sp|Q2T9N1|F1142_BOVIN	0.9583	0.384027	Not Interesting
g10367	sp|Q8CH40|NUDT6_MOUSE	0.442594	0.706802	Not Interesting
g10368	NA	0.689231	0.593711	Not Interesting
g10380	sp|P49919|CDN1C_MOUSE	0.867488	1.13111	Not Interesting
g10404	NA	2.31236	0.681643	Not Interesting
g10410	sp|Q4H4B6|SCRIB_DANRE	-0.721203	-0.0391236	Not Interesting
g10411	NA	1.73823	0.813947	Not Interesting
g10458	sp|Q18775|DOPR4_CAEEL	4.24691	2.65251	Not Interesting
g10482	sp|Q62829|PAK3_RAT	-0.22295	-0.439795	Not Interesting
g10484	sp|Q6DF08|UXS1_XENTR	0.0789631	0.645821	Not Interesting
g10491	NA	-0.576841	-0.333438	Not Interesting
g10498	sp|O93603|TRFR_CHICK	-0.678235	-1.6824	Not Interesting
g10500	NA	-0.0458749	-0.497575	Not Interesting
g10511	sp|Q8CFV2|F149A_MOUSE	-0.960759	-0.375939	Not Interesting
g10512	sp|P54145|AMT1_CAEEL	0.544846	0.486825	Not Interesting
g10527	sp|Q9CSH3|RRP44_MOUSE	-0.849027	-0.0448571	Not Interesting
g1053	NA	1.0981	0.30942	Not Interesting
g10546	sp|O18883|TXND9_BOVIN	0.452939	0.591452	Not Interesting
g10556	sp|P49010|HEXC_BOMMO	-0.653002	-0.604736	Not Interesting
g10574	sp|A7RR04|EFGM_NEMVE	-1.00334	-0.0199256	Not Interesting
g10575	sp|A7RR04|EFGM_NEMVE	-0.692236	-0.0661548	Not Interesting
g10581	sp|P02264|H2A_ONCMY	-1.88179	-1.39698	Not Interesting
g1059	sp|P61214|ARL4A_RAT	0.653151	-0.0649709	Not Interesting
g10604	sp|P49715|CEBPA_HUMAN	-0.531995	-0.217375	Not Interesting
g10606	sp|O15381|NVL_HUMAN	-0.643571	-0.0429149	Not Interesting
g10616	sp|Q80U35|ARHGH_MOUSE	-1.2331	-0.624245	Not Interesting
g1063	sp|P0DN09|VKT5_ANEVI	2.17136	2.5205	Not Interesting
g10637	sp|Q766D5|B4GN4_MOUSE	-0.832269	-1.39717	Not Interesting
g1064	sp|Q28864|TFPI1_MACMU	2.54657	2.3582	Not Interesting
g10641	sp|Q6DIN3|MBTD1_XENTR	-0.650895	-0.38251	Not Interesting
g10645	sp|Q6DIN3|MBTD1_XENTR	-0.471165	-0.298512	Not Interesting
g10648	sp|Q5R7P4|BGAL_PONAB	-0.319773	-0.645532	Not Interesting
g10649	sp|Q9VJ79|PDE11_DROME	-0.64788	-0.663232	Not Interesting
g10650	sp|Q7LL04|YQK1_SCHPO	1.77557	1.36672	Not Interesting
g10677	sp|Q8VIG3|RSPH1_MOUSE	-0.00733549	-0.954296	Not Interesting
g10680	sp|H2A0N9|KCP4_PINMG	4.68337	4.81028	Not Interesting
g10682	sp|P38977|ANTA_HYDVU	5.09126	4.12387	Not Interesting
g10688	sp|Q5EBP3|ARMC5_MOUSE	0.623997	0.335434	Not Interesting
g10700	sp|Q0VH32|MNT_XENLA	-0.924181	-1.22784	Not Interesting
g10711	NA	0.121727	0.822558	Not Interesting
g10736	sp|P57709|AT2C1_BOVIN	0.434726	0.586582	Not Interesting
g10737	sp|D4AK17|PLCX1_ARTBC	-0.0901724	-0.619527	Not Interesting
g10738	sp|O93477|SAHHB_XENLA	-0.804348	-0.103322	Not Interesting
g10739	sp|O75506|HSBP1_HUMAN	0.77929	-0.205659	Not Interesting
g10787	sp|D3ZHA0|FLNC_RAT	-0.94896	-0.758663	Not Interesting
g10792	sp|Q3UM45|PP1R7_MOUSE	1.01389	0.0629666	Not Interesting
g10800	sp|Q2TBU3|GOSR1_BOVIN	0.703927	0.0825589	Not Interesting
g10850	NA	-2.36885	-3.3003	Not Interesting
g10853	sp|Q5HZJ0|RNC_MOUSE	1.2313	0.873087	Not Interesting
g1090	sp|Q9BY11|PACN1_HUMAN	-0.591419	-0.64375	Not Interesting
g10932	sp|P29061|CHIB_TOBAC	0.82896	0.631279	Not Interesting
g10933	sp|Q9Y2H1|ST38L_HUMAN	0.480639	0.505216	Not Interesting
g10953	sp|Q66KV4|BAFB_XENLA	1.15106	-0.191426	Not Interesting
g1096	sp|Q63429|UBC_RAT	0.271493	0.689166	Not Interesting
g10961	sp|Q9CYL5|GAPR1_MOUSE	-3.22697	-3.95642	Not Interesting
g10967	NA	3.21534	3.16824	Not Interesting
g10986	NA	1.39527	1.13606	Not Interesting
g11016	NA	1.14526	1.27647	Not Interesting
g11020	sp|Q99PD4|ARC1A_RAT	-0.622875	-0.0430813	Not Interesting
g11021	sp|O76075|DFFB_HUMAN	2.61599	2.44563	Not Interesting
g11056	NA	-0.665	-0.73615	Not Interesting
g11061	NA	1.44506	1.31428	Not Interesting
g11069	sp|Q9VAI0|GNA1_DROME	2.13518	1.40237	Not Interesting
g11091	sp|Q92519|TRIB2_HUMAN	1.64029	0.90393	Not Interesting
g11092	sp|O97902|ASAP1_BOVIN	-0.564606	-0.286207	Not Interesting
g11094	sp|Q9MYS6|KCNQ1_RABIT	1.00443	0.604356	Not Interesting
g11105	sp|D4A7U2|CARTF_RAT	1.27788	0.964499	Not Interesting
g11106	NA	0.969658	0.191131	Not Interesting
g11120	NA	1.75682	1.12767	Not Interesting
g11130	sp|B2KNH9|LEC_DENFN	6.82564	6.64036	Not Interesting
g11134	NA	-0.762536	-1.13034	Not Interesting
g11135	NA	-3.58659	-0.223349	Not Interesting
g11169	sp|Q5ZI67|NHLC2_CHICK	0.632932	0.156074	Not Interesting
g11170	sp|Q66T02|PKHG5_MOUSE	0.962842	0.374342	Not Interesting
g11196	sp|Q8TAC1|RFESD_HUMAN	-0.737884	-0.657867	Not Interesting
g11210	sp|Q14DH7|ACSS3_MOUSE	-0.519659	-0.280778	Not Interesting
g1125	sp|Q00G26|PLIN5_HUMAN	1.71643	2.09917	Not Interesting
g11268	sp|Q9NTI2|AT8A2_HUMAN	-1.04347	0.261303	Not Interesting
g1132	NA	-1.33801	-1.56546	Not Interesting
g11330	sp|Q9KWN0|AHV_ACTSK	0.705298	1.56806	Not Interesting
g11352	sp|P08120|CO4A1_DROME	0.981792	-0.00881076	Not Interesting
g11353	sp|Q4ZJM7|OTOL1_MOUSE	0.824075	0.10672	Not Interesting
g11354	sp|P05099|MATN1_CHICK	0.62006	0.529029	Not Interesting
g11358	NA	-0.51639	-2.14899	Not Interesting
g11363	sp|P35520|CBS_HUMAN	-1.47532	-1.78037	Not Interesting
g11366	sp|P35520|CBS_HUMAN	-0.533332	-0.303648	Not Interesting
g11373	sp|Q54CS8|PEX6_DICDI	-0.409516	-0.7274	Not Interesting
g11391	sp|Q3ZKN0|S27A1_BOVIN	-0.611151	-0.6965	Not Interesting
g11395	sp|Q9R087|GPC6_MOUSE	0.450237	0.187163	Not Interesting
g11398	sp|Q7SXW3|LRC40_DANRE	1.81689	1.593	Not Interesting
g11432	sp|Q64487|PTPRD_MOUSE	-0.53587	-0.292371	Not Interesting
g11438	sp|Q95SX7|RTBS_DROME	1.72462	1.39901	Not Interesting
g11444	sp|Q9H7M6|ZSWM4_HUMAN	-1.34182	-0.309191	Not Interesting
g11469	NA	1.12829	1.27103	Not Interesting
g11470	sp|Q96LW9|ZSC31_HUMAN	1.69324	0.964803	Not Interesting
g11480	NA	1.77886	0.596265	Not Interesting
g11482	sp|Q80WQ9|ZBED4_MOUSE	1.00556	2.35557	Not Interesting
g11487	NA	-0.893076	-1.11391	Not Interesting
g11497	sp|Q7ZXE9|TES_XENLA	-1.09181	-1.48271	Not Interesting
g11498	sp|P34743|BTG1_CHICK	0.808636	1.02709	Not Interesting
g11501	NA	2.75694	1.92189	Not Interesting
g11504	sp|P16157|ANK1_HUMAN	-1.09932	-0.504006	Not Interesting
g11519	sp|A2AVA0|SVEP1_MOUSE	-0.741935	-0.517907	Not Interesting
g11528	sp|P02466|CO1A2_RAT	-0.149914	-0.964516	Not Interesting
g11539	sp|Q5RCY3|EMP1_PONAB	-0.937555	-0.619925	Not Interesting
g11545	sp|Q60813|ADM1A_MOUSE	-1.52749	-1.07989	Not Interesting
g11546	sp|Q61072|ADAM9_MOUSE	-1.4628	-1.21004	Not Interesting
g11550	sp|F8RKV9|VM39_DRYCN	-1.2302	-1.28162	Not Interesting
g11551	NA	-2.01768	-1.15029	Not Interesting
g11552	sp|Q9NBX4|RTXE_DROME	-1.06922	-1.37554	Not Interesting
g11553	sp|P07996|TSP1_HUMAN	-1.5122	-1.05132	Not Interesting
g11554	sp|Q5EA92|AL14E_BOVIN	0.889358	0.528187	Not Interesting
g11555	sp|Q6GPQ6|EDF1_XENLA	-2.25178	0.686849	Not Interesting
g11588	NA	-2.41711	-3.30007	Not Interesting
g11591	sp|A0MSJ1|CRA1B_DANRE	-0.0286187	-0.695317	Not Interesting
g11593	sp|Q64739|COBA2_MOUSE	0.0624418	-0.775647	Not Interesting
g11604	NA	-0.679822	-1.00212	Not Interesting
g11612	sp|Q8IZF6|AGRG4_HUMAN	1.37037	1.40524	Not Interesting
g11632	sp|Q9R160|ADA24_MOUSE	-1.35502	-0.971507	Not Interesting
g11633	sp|Q96RW7|HMCN1_HUMAN	-1.33329	-0.201508	Not Interesting
g11634	sp|Q61824|ADA12_MOUSE	-0.836921	-0.569218	Not Interesting
g11635	sp|Q13443|ADAM9_HUMAN	-1.32839	-0.020382	Not Interesting
g11678	sp|P51659|DHB4_HUMAN	-0.475416	-0.0132287	Not Interesting
g11692	sp|Q9JJC6|RIPL1_MOUSE	0.667251	0.659162	Not Interesting
g11693	sp|Q9M0A7|GGP1_ARATH	1.16723	0.378209	Not Interesting
g11694	sp|P39921|TPM1_HYDVU	-1.18416	0.149361	Not Interesting
g11696	sp|P39921|TPM1_HYDVU	-1.42088	-1.23003	Not Interesting
g11698	sp|P55112|NAS4_CAEEL	2.39487	3.90377	Not Interesting
g11718	NA	1.86745	1.12904	Not Interesting
g11745	sp|Q90623|MYPT1_CHICK	0.791449	0.748954	Not Interesting
g11757	NA	1.29229	-0.0670319	Not Interesting
g11758	sp|Q29IM7|CASP8_DROPS	2.2474	1.32724	Not Interesting
g11765	sp|P54366|GSC_DROME	-0.405903	-1.4258	Not Interesting
g11766	sp|O43916|CHST1_HUMAN	0.603113	0.0693458	Not Interesting
g11767	sp|Q7ZUS1|VRK1_DANRE	1.86011	1.40439	Not Interesting
g11769	sp|Q7M3K2|PELET_DROME	2.34842	2.48616	Not Interesting
g11780	sp|Q62445|SP4_MOUSE	-1.0867	-1.5511	Not Interesting
g11786	sp|P61315|G3ST3_MOUSE	1.61039	1.09071	Not Interesting
g11792	sp|Q4R5C7|SRP14_MACFA	0.695983	-0.100438	Not Interesting
g11808	sp|Q6GMK6|TSN9_DANRE	1.35599	0.609351	Not Interesting
g11829	sp|Q7LKY2|ADDH_SCHPO	-0.713826	-0.579887	Not Interesting
g11852	sp|Q2TBV5|TF2H2_BOVIN	-0.584875	-0.2073	Not Interesting
g11860	NA	-2.40848	-3.29113	Not Interesting
g11880	sp|Q17RW2|COOA1_HUMAN	-0.345012	-1.18012	Not Interesting
g11886	NA	3.19415	2.37885	Not Interesting
g11925	sp|Q9BUZ4|TRAF4_HUMAN	-0.705394	-0.398048	Not Interesting
g11928	sp|A4FUD3|U5S1_BOVIN	-0.54656	-0.00778001	Not Interesting
g11941	sp|O15042|SR140_HUMAN	-0.580568	-0.0494869	Not Interesting
g11950	sp|Q8CFH6|SIK2_MOUSE	1.2673	1.47934	Not Interesting
g11957	NA	-0.492904	-0.219697	Not Interesting
g11969	sp|D3YXG0|HMCN1_MOUSE	0.898806	0.671407	Not Interesting
g11970	sp|Q6NUB2|CW15A_XENLA	-0.568772	-0.0701902	Not Interesting
g11971	sp|Q6NZE7|F122B_MOUSE	-1.07438	-0.816882	Not Interesting
g11977	NA	1.31696	0.720008	Not Interesting
g11984	sp|Q8R123|FAD1_MOUSE	-1.10343	-1.06878	Not Interesting
g11994	NA	3.86872	3.21305	Not Interesting
g11996	sp|A5PN43|TM175_DANRE	3.1329	2.75321	Not Interesting
g12003	sp|Q7TNH6|NPHP3_MOUSE	1.87999	0.493383	Not Interesting
g12037	sp|A7S7F2|BYST_NEMVE	-2.63997	-0.395837	Not Interesting
g12038	NA	-0.651655	-0.180359	Not Interesting
g12040	NA	2.31671	2.63799	Not Interesting
g12046	sp|Q63150|DPYS_RAT	-0.25169	-0.481535	Not Interesting
g12048	sp|P62282|RS11_RAT	-1.2012	0.261631	Not Interesting
g12054	sp|Q6NZZ4|TM107_DANRE	1.24023	0.591318	Not Interesting
g12056	NA	-0.754566	-1.40951	Not Interesting
g12061	sp|Q08DQ2|GFPT2_BOVIN	1.57943	1.56128	Not Interesting
g12068	sp|D3YXG0|HMCN1_MOUSE	-0.794319	-0.607892	Not Interesting
g1208	sp|A5PN43|TM175_DANRE	1.94453	2.39078	Not Interesting
g12093	sp|Q8JZK9|HMCS1_MOUSE	-0.230941	-0.699289	Not Interesting
g12096	sp|P14173|DDC_RAT	-0.660501	-0.866272	Not Interesting
g12098	sp|Q05910|ADAM8_MOUSE	-1.1152	-0.653037	Not Interesting
g12099	NA	-1.40521	-0.700079	Not Interesting
g12100	sp|P14173|DDC_RAT	-0.899381	-0.695805	Not Interesting
g12122	sp|Q9GLE4|MMP14_BOVIN	0.678692	0.414117	Not Interesting
g12125	sp|Q95NI4|CALM_HALOK	2.80152	2.20099	Not Interesting
g12126	sp|Q08E00|RASLC_BOVIN	3.00282	2.05641	Not Interesting
g12139	NA	1.17875	-0.107716	Not Interesting
g12142	sp|P21328|RTJK_DROME	3.99384	4.8319	Not Interesting
g12143	NA	-0.129171	0.824268	Not Interesting
g12148	sp|Q63850|NUP62_MOUSE	-0.706309	-0.101544	Not Interesting
g12154	sp|O75154|RFIP3_HUMAN	-0.908029	-0.544966	Not Interesting
g12178	sp|P81274|GPSM2_HUMAN	-0.677983	-0.421029	Not Interesting
g12179	NA	2.73202	1.79735	Not Interesting
g12183	sp|Q9D1A2|CNDP2_MOUSE	-0.0941658	-0.376346	Not Interesting
g12199	NA	0.485568	0.692266	Not Interesting
g12203	sp|P13834|GYS1_RABIT	-0.566835	-0.372264	Not Interesting
g12207	sp|P21328|RTJK_DROME	0.956496	0.492788	Not Interesting
g12221	NA	1.86847	0.835074	Not Interesting
g12223	sp|D3ZDI6|MYLIP_RAT	0.585568	0.496166	Not Interesting
g12236	NA	2.79687	2.7004	Not Interesting
g12290	sp|Q5R886|TF2B_PONAB	-0.934383	-0.00353011	Not Interesting
g12304	NA	1.96098	0.387422	Not Interesting
g12322	sp|P40240|CD9_MOUSE	1.72024	1.4058	Not Interesting
g12340	sp|Q76JQ2|FLCN_RAT	-0.472565	-0.118422	Not Interesting
g12342	sp|Q6TLI9|DRD2_MUSPF	5.39999	6.23351	Not Interesting
g12371	sp|Q640R7|RAP1B_XENTR	-1.65056	-2.04642	Not Interesting
g12372	sp|Q09930|DIRA_CAEEL	0.615801	0.545343	Not Interesting
g12395	sp|Q8C428|TMC7_MOUSE	0.572913	0.294455	Not Interesting
g12396	sp|Q8T5Z4|RS19_BRABE	-1.2809	0.0513846	Not Interesting
g12418	sp|Q5R8J8|DNJB4_PONAB	2.48189	2.41523	Not Interesting
g12434	sp|A4GTP4|ELK1_RAT	2.83972	1.35632	Not Interesting
g12439	sp|P41969|ELK1_MOUSE	3.21743	2.2182	Not Interesting
g12440	NA	4.24634	2.80931	Not Interesting
g12447	sp|A4GTP4|ELK1_RAT	1.18609	0.887796	Not Interesting
g12458	sp|P0C548|PLPL2_RAT	-1.41118	-2.1764	Not Interesting
g12462	sp|P08935|CYT_BITAR	1.43219	0.207748	Not Interesting
g12464	sp|Q9VBP3|TNKS_DROME	-1.95203	-1.44693	Not Interesting
g12469	NA	1.07964	0.291082	Not Interesting
g12471	NA	2.22069	2.04593	Not Interesting
g12478	sp|Q9CYL5|GAPR1_MOUSE	2.68222	1.732	Not Interesting
g1253	NA	-0.214685	-2.42134	Not Interesting
g12542	NA	2.06495	0.244518	Not Interesting
g12543	sp|Q4R4T9|RANB3_MACFA	-0.354736	-0.025576	Not Interesting
g12555	sp|Q8CD26|S35E1_MOUSE	0.792511	-0.114049	Not Interesting
g12562	sp|P08770|TRA1_MAIZE	2.08814	1.33321	Not Interesting
g12568	NA	1.10174	0.997869	Not Interesting
g12571	sp|Q17QJ5|TSN5_BOVIN	0.765113	0.512851	Not Interesting
g12573	sp|O35449|PRRT1_MOUSE	-1.18485	-0.476815	Not Interesting
g12580	sp|Q9CYL5|GAPR1_MOUSE	-2.17551	0.127491	Not Interesting
g12585	sp|A2AVA0|SVEP1_MOUSE	0.367666	0.441845	Not Interesting
g12595	sp|Q5E9U9|NPRL2_BOVIN	-0.0229396	-0.472895	Not Interesting
g12602	sp|E7EYQ9|TM216_DANRE	1.30783	0.668958	Not Interesting
g12603	sp|Q17QJ5|TSN5_BOVIN	0.798531	0.486603	Not Interesting
g12649	sp|Q0VCR1|RTF2_BOVIN	-0.564997	0.00350132	Not Interesting
g12650	NA	1.34683	0.339759	Not Interesting
g12653	sp|Q8MPM1|GELS2_LUMTE	-0.380763	-0.27226	Not Interesting
g1266	sp|O16025|AOSL_PLEHO	-1.01642	-0.443702	Not Interesting
g12687	NA	4.70467	4.67703	Not Interesting
g1269	sp|P11680|PROP_MOUSE	-2.10043	-1.99727	Not Interesting
g12698	sp|Q99PL6|UBXN6_MOUSE	-0.823355	-0.644153	Not Interesting
g12706	sp|Q539E5|APX1_HYDVD	-1.01631	-1.28326	Not Interesting
g12710	sp|P35283|RAB12_MOUSE	3.60316	3.56615	Not Interesting
g1273	sp|P11680|PROP_MOUSE	-1.99724	-1.9772	Not Interesting
g12732	sp|Q8CIS0|CAR11_MOUSE	0.743987	1.12029	Not Interesting
g12739	sp|Q7ZX59|CRLF3_XENLA	-0.469623	-0.330005	Not Interesting
g12744	sp|Q8IWF2|FXRD2_HUMAN	0.404864	0.0131618	Not Interesting
g12748	sp|Q9DCR2|AP3S1_MOUSE	0.467118	0.385003	Not Interesting
g12749	sp|Q58EX2|SDK2_HUMAN	0.133209	0.437687	Not Interesting
g1275	sp|P27918|PROP_HUMAN	-3.27857	-2.94876	Not Interesting
g12756	NA	-0.922546	-0.986799	Not Interesting
g12758	sp|O70257|STX7_RAT	-1.14927	0.557147	Not Interesting
g1276	sp|Q96RW7|HMCN1_HUMAN	-3.54823	-3.45905	Not Interesting
g12768	sp|Q13976|KGP1_HUMAN	-0.761608	-0.254999	Not Interesting
g12769	sp|P0C605|KGP1_MOUSE	-0.465331	-0.237456	Not Interesting
g12771	NA	-1.09958	-0.355266	Not Interesting
g1279	NA	-3.21767	-3.04509	Not Interesting
g12790	sp|Q9NZN8|CNOT2_HUMAN	-0.40616	-0.34344	Not Interesting
g12796	sp|Q9XIJ5|PUB18_ARATH	-0.857038	-0.62624	Not Interesting
g12804	NA	1.76204	0.292584	Not Interesting
g12806	sp|A9UMS3|PHB2_XENTR	-1.11623	-0.216979	Not Interesting
g12809	sp|Q2YDF6|RT35_BOVIN	-0.591863	0.0304569	Not Interesting
g12839	sp|Q19KI0|RHCG_PIG	0.264664	0.547506	Not Interesting
g12840	sp|Q4VUZ1|RHCG_ONCMY	-2.0887	-0.783941	Not Interesting
g12845	sp|P35448|TSP1_XENLA	-0.540933	-0.58464	Not Interesting
g12862	sp|Q3MII6|TBC25_HUMAN	0.448678	0.125456	Not Interesting
g12868	sp|Q2KNE5|OPN4A_DANRE	1.39133	0.457652	Not Interesting
g12875	NA	-0.905039	-0.905523	Not Interesting
g12884	sp|P80513|MANF_BOVIN	1.90293	0.655885	Not Interesting
g12888	sp|Q8ST83|PHO_DROME	0.598965	0.300862	Not Interesting
g12893	sp|Q63187|ELOA1_RAT	0.549778	0.490397	Not Interesting
g12896	sp|O18738|DAG1_BOVIN	0.892548	0.738294	Not Interesting
g12898	sp|O94812|BAIP3_HUMAN	-0.665729	-0.0412986	Not Interesting
g12915	sp|O45818|DKF2_CAEEL	1.41317	0.899516	Not Interesting
g12949	sp|Q8NHV1|GIMA7_HUMAN	-0.0463497	-0.705756	Not Interesting
g12951	NA	3.85483	3.2153	Not Interesting
g12952	sp|P79113|NPY2R_BOVIN	-1.48371	-1.63046	Not Interesting
g12970	sp|A8Z5Z5|SECA_SULMW	-1.31951	-0.733543	Not Interesting
g12973	sp|Q5EAK8|DRAM1_XENTR	0.13129	-1.23477	Not Interesting
g12981	NA	2.06824	1.72522	Not Interesting
g12992	sp|P69478|CHSTB_RAT	3.83519	4.34329	Not Interesting
g12996	sp|Q96IP4|FA46A_HUMAN	1.30074	0.828527	Not Interesting
g13002	sp|P11118|CALM_EUGGR	-2.00601	0.24599	Not Interesting
g13008	sp|P24423|YVNF_AZOCH	1.64701	0.638844	Not Interesting
g1301	NA	3.30423	2.43857	Not Interesting
g13014	NA	-1.01599	-0.819357	Not Interesting
g13016	sp|Q5ZKD9|KLH20_CHICK	-1.08055	-0.644998	Not Interesting
g13029	NA	0.528448	0.0748785	Not Interesting
g13032	sp|Q8LBI9|EDL16_ARATH	-1.46993	-2.24696	Not Interesting
g13058	sp|H6BDU4|SODC_CAMDR	0.665278	0.137973	Not Interesting
g13063	NA	0.461674	0.015141	Not Interesting
g13103	sp|P35317|AT1A_HYDVU	0.573818	0.614959	Not Interesting
g13104	sp|P35317|AT1A_HYDVU	0.962955	0.427909	Not Interesting
g13108	sp|Q8CHN6|SGPL1_RAT	0.184923	0.676842	Not Interesting
g13109	NA	-1.29942	-1.51669	Not Interesting
g13121	sp|Q9Y2U5|M3K2_HUMAN	-1.07139	-0.124623	Not Interesting
g13125	NA	-0.730385	-0.281528	Not Interesting
g13126	NA	-0.512104	-0.326241	Not Interesting
g13127	sp|P03934|TC1A_CAEEL	0.0545065	-0.781681	Not Interesting
g13130	NA	-0.495009	-0.34928	Not Interesting
g13131	NA	0.859476	-0.0412077	Not Interesting
g13138	sp|P34743|BTG1_CHICK	1.38162	1.06583	Not Interesting
g13140	sp|A7MBP4|IFT46_DANRE	-0.499039	-0.632688	Not Interesting
g13145	sp|P0CJ14|VP302_LYCMC	0.435562	0.178913	Not Interesting
g13155	sp|Q2TAF4|INT6A_XENLA	-0.693642	-0.751846	Not Interesting
g13175	NA	-2.29643	0.792626	Not Interesting
g13181	sp|Q9QY96|CASR_MOUSE	-1.81709	-1.00989	Not Interesting
g13190	sp|Q8MIZ3|DCPS_PIG	0.826161	-0.151125	Not Interesting
g13194	sp|Q5DTZ6|RN150_MOUSE	0.571078	0.228243	Not Interesting
g1320	sp|Q8K007|SULF1_MOUSE	1.38326	1.60673	Not Interesting
g13212	sp|Q9Y6L7|TLL2_HUMAN	-1.0343	-0.82264	Not Interesting
g13225	sp|O43172|PRP4_HUMAN	-0.364806	-0.184902	Not Interesting
g13229	sp|P09954|CBPA1_PIG	-0.799986	-0.488502	Not Interesting
g13235	sp|Q9CTG6|AT132_MOUSE	-0.775558	-0.353158	Not Interesting
g13247	sp|Q9KWN0|AHV_ACTSK	2.74008	3.86129	Not Interesting
g13250	sp|Q9KWN0|AHV_ACTSK	1.74326	3.0359	Not Interesting
g13272	sp|P18729|ZG57_XENLA	0.65876	0.350028	Not Interesting
g13307	sp|P41252|SYIC_HUMAN	0.324604	0.709635	Not Interesting
g13308	sp|P41252|SYIC_HUMAN	0.538577	0.620635	Not Interesting
g13309	sp|P41252|SYIC_HUMAN	0.982893	0.568319	Not Interesting
g13311	sp|Q9DC48|PRP17_MOUSE	-0.700031	0.215765	Not Interesting
g1335	sp|F4JTP5|STY46_ARATH	1.17546	0.624529	Not Interesting
g13361	sp|P0C8L6|PHS_HYPDU	2.04061	0.317397	Not Interesting
g13371	NA	0.393342	0.0708971	Not Interesting
g13375	NA	0.768806	0.984858	Not Interesting
g13376	sp|Q9GLY5|ITIH3_RABIT	0.337343	0.668326	Not Interesting
g13378	NA	1.98528	1.66935	Not Interesting
g13390	sp|Q5NVF6|PPAL_PONAB	0.787904	0.190928	Not Interesting
g134	sp|Q9Y5Y0|FLVC1_HUMAN	0.751874	0.5434	Not Interesting
g13412	sp|O75197|LRP5_HUMAN	-0.886588	-0.673519	Not Interesting
g13421	NA	1.39995	0.859691	Not Interesting
g13429	sp|Q92797|SYMPK_HUMAN	-0.550817	-0.0702165	Not Interesting
g13433	NA	-0.457241	-0.828768	Not Interesting
g13437	NA	1.14306	0.850241	Not Interesting
g13448	sp|Q08759|MYB_XENLA	-0.675086	-0.163145	Not Interesting
g13449	NA	-0.562164	-0.687483	Not Interesting
g13478	sp|Q8CBH5|MFSD6_MOUSE	-1.55322	-2.92153	Not Interesting
g1351	NA	3.29496	2.08939	Not Interesting
g13514	sp|Q9BX10|GTPB2_HUMAN	1.58925	1.67594	Not Interesting
g13520	NA	1.05146	1.47398	Not Interesting
g13529	NA	1.36668	0.882442	Not Interesting
g1354	sp|Q8WXI2|CNKR2_HUMAN	-0.774064	-0.0858477	Not Interesting
g13547	sp|Q174I2|PRIC1_AEDAE	0.550378	0.122599	Not Interesting
g13578	NA	1.51492	1.10612	Not Interesting
g13585	sp|Q15760|GPR19_HUMAN	-2.28336	-1.51174	Not Interesting
g13587	sp|Q64121|PRLHR_RAT	1.41484	2.02562	Not Interesting
g13590	sp|Q54K09|GRLQ_DICDI	-0.80187	-0.807791	Not Interesting
g13598	NA	-1.10684	-0.105901	Not Interesting
g13603	NA	2.88005	4.59902	Not Interesting
g13608	NA	3.70705	6.77838	Not Interesting
g13612	NA	7.87093	7.79988	Not Interesting
g13619	NA	8.11794	6.31403	Not Interesting
g13621	sp|P61315|G3ST3_MOUSE	1.40206	0.516911	Not Interesting
g13634	sp|Q9D9I4|TBC20_MOUSE	-0.607861	-0.722532	Not Interesting
g13653	NA	-0.892438	0.040236	Not Interesting
g13664	sp|P29506|UNC4_CAEEL	-0.787523	-0.959222	Not Interesting
g13671	sp|Q7T0W1|BOP1A_XENLA	-0.612605	-0.17687	Not Interesting
g13672	sp|A4IHS2|BOP1_XENTR	-0.595409	0.215655	Not Interesting
g13678	sp|Q5PQM2|KLC4_RAT	1.73029	0.458594	Not Interesting
g13681	sp|Q7Z494|NPHP3_HUMAN	2.12509	0.554063	Not Interesting
g13683	NA	1.14223	-0.0521323	Not Interesting
g13686	sp|P46824|KLC_DROME	2.59833	1.0313	Not Interesting
g13690	sp|Q28DG7|UBAC1_XENTR	-0.497706	-0.471126	Not Interesting
g13694	NA	2.24589	0.757262	Not Interesting
g13698	sp|Q804X9|OPN4A_GADMO	-0.896309	-1.47735	Not Interesting
g137	sp|P57784|RU2A_MOUSE	0.852014	0.0999861	Not Interesting
g13709	sp|Q3V096|ANR42_MOUSE	0.686735	0.180374	Not Interesting
g13719	NA	0.455449	0.922239	Not Interesting
g13720	NA	-1.23727	-1.48326	Not Interesting
g13722	NA	0.77459	0.374948	Not Interesting
g13728	sp|Q9Y2G0|EFR3B_HUMAN	-0.511755	-0.320964	Not Interesting
g13730	sp|P42325|NCAH_DROME	0.707385	1.0084	Not Interesting
g13741	sp|Q27433|MEC2_CAEEL	-0.334194	-0.543428	Not Interesting
g1375	sp|P23378|GCSP_HUMAN	-0.52207	-0.0490658	Not Interesting
g13800	sp|Q6PH57|GBB1_DANRE	-1.24692	-0.607945	Not Interesting
g13801	sp|Q5UQ60|YL662_MIMIV	1.13385	1.39205	Not Interesting
g13859	NA	1.22927	0.315576	Not Interesting
g1386	sp|B3Y064|OBRG_TAKRU	1.18655	0.383472	Not Interesting
g13860	NA	-3.27287	0.308427	Not Interesting
g13866	sp|Q3SX22|BSDC1_BOVIN	0.559269	0.431752	Not Interesting
g13898	sp|Q7PHR1|KIF1A_ANOGA	-1.49795	-0.0944073	Not Interesting
g1390	sp|Q9WU61|CLCC1_RAT	0.495768	-0.017815	Not Interesting
g13903	sp|Q9UKF6|CPSF3_HUMAN	-0.625567	-0.120875	Not Interesting
g13904	NA	-2.43516	0.662711	Not Interesting
g13905	sp|Q27245|YH24_CAEEL	-0.448118	-0.30912	Not Interesting
g13907	sp|O88866|HUNK_MOUSE	0.606464	0.732273	Not Interesting
g13918	sp|P31836|NCAM1_BOVIN	0.626305	0.057178	Not Interesting
g13962	sp|Q9JJA9|GRASP_MOUSE	0.132248	-0.565907	Not Interesting
g13971	sp|Q9ASR4|BCAL2_ARATH	-0.124079	-1.1326	Not Interesting
g1398	sp|Q75WS4|CRYD_XENLA	-0.250766	-0.699141	Not Interesting
g13980	sp|Q9TWL9|COMA_CONMA	-0.816039	-0.860735	Not Interesting
g13999	sp|Q00174|LAMA_DROME	1.35227	0.712782	Not Interesting
g14000	sp|Q00174|LAMA_DROME	0.861674	0.630343	Not Interesting
g14001	NA	0.989882	1.32356	Not Interesting
g14018	sp|Q15063|POSTN_HUMAN	-6.02909	-6.57139	Not Interesting
g14028	sp|Q5F3I6|TM104_CHICK	0.942743	0.590107	Not Interesting
g14033	sp|Q5F3I6|TM104_CHICK	1.7211	0.495022	Not Interesting
g14037	sp|Q30T29|GMHA_SULDN	1.79705	1.57479	Not Interesting
g14048	sp|Q9UIK4|DAPK2_HUMAN	1.4611	1.57592	Not Interesting
g14057	NA	-0.122287	-1.45738	Not Interesting
g14070	sp|Q14766|LTBP1_HUMAN	-1.51028	1.54486	Head
g14107	sp|A8GCA7|RIMK_SERP5	1.54924	1.14931	Not Interesting
g14122	sp|P61129|ZC3H6_HUMAN	-0.583795	0.171848	Not Interesting
g14123	sp|Q58DG1|MYG1_BOVIN	-0.373154	-0.421291	Not Interesting
g14148	sp|B8JMH0|CAF17_DANRE	-0.163225	-0.87172	Not Interesting
g14156	NA	1.16697	0.113089	Not Interesting
g14166	sp|O00750|P3C2B_HUMAN	-0.287448	-0.586789	Not Interesting
g14169	sp|Q3SZM6|COXM1_BOVIN	1.45024	0.136259	Not Interesting
g14206	NA	1.10979	-0.0362133	Not Interesting
g14213	NA	1.19869	1.07125	Not Interesting
g14220	NA	5.86566	6.80612	Not Interesting
g14225	NA	10.296	6.40456	Not Interesting
g14229	sp|Q9H772|GREM2_HUMAN	-1.21388	-0.575216	Not Interesting
g14230	sp|Q0P651|ABD18_HUMAN	-1.23681	-0.621907	Not Interesting
g14234	sp|Q8C1A9|ABD18_MOUSE	-0.96072	-0.724723	Not Interesting
g14238	sp|Q8C1A9|ABD18_MOUSE	-0.275945	-0.720738	Not Interesting
g14239	sp|Q9Y6W6|DUS10_HUMAN	1.5329	1.44665	Not Interesting
g14240	sp|Q58ED9|NAA20_DANRE	0.995779	-0.222911	Not Interesting
g14241	NA	1.16425	0.430933	Not Interesting
g14242	NA	0.994904	0.425163	Not Interesting
g14243	sp|P0CT39|TF26_SCHPO	1.51566	0.802363	Not Interesting
g14259	sp|Q8K4Q0|RPTOR_MOUSE	-0.731684	-0.412196	Not Interesting
g14281	sp|Q95SX7|RTBS_DROME	2.90449	2.36361	Not Interesting
g14300	sp|Q9BSR8|YIPF4_HUMAN	1.79413	0.68271	Not Interesting
g14310	sp|Q6DJN2|TRF6B_XENLA	-0.609917	-0.28705	Not Interesting
g14320	sp|P35400|GRM7_RAT	-1.69138	-2.33581	Not Interesting
g14333	sp|Q96J94|PIWL1_HUMAN	-0.571817	-0.359307	Not Interesting
g14346	sp|P27590|UROM_RAT	0.914423	0.827092	Not Interesting
g14347	sp|P98158|LRP2_RAT	0.951199	0.976698	Not Interesting
g1435	NA	0.201939	0.465053	Not Interesting
g14365	NA	0.92602	0.113793	Not Interesting
g14380	sp|O77775|NCF2_BOVIN	1.75777	2.05406	Not Interesting
g14401	sp|A2AH22|AMRA1_MOUSE	-0.915954	-0.190745	Not Interesting
g14402	sp|Q6DG32|S2536_DANRE	2.30851	2.07333	Not Interesting
g14428	sp|Q17R13|ACK1_BOVIN	2.11456	0.827558	Not Interesting
g14429	sp|Q9I7F7|PR2_DROME	1.04372	0.796255	Not Interesting
g14434	sp|O35166|GOSR2_MOUSE	0.822008	-0.0119149	Not Interesting
g14435	sp|Q91175|ADA1A_ORYLA	-1.32194	-1.5962	Not Interesting
g14455	NA	3.57995	3.83881	Not Interesting
g14470	sp|P53690|MMP14_MOUSE	1.08468	-0.0308537	Not Interesting
g14484	NA	-1.99347	-2.06837	Not Interesting
g14494	sp|Q61097|KSR1_MOUSE	-0.692738	-0.673614	Not Interesting
g14498	sp|Q8BFR5|EFTU_MOUSE	-0.575003	-0.0741559	Not Interesting
g1450	sp|P18870|JUN_CHICK	1.85522	1.74962	Not Interesting
g14519	NA	-0.792819	-0.425057	Not Interesting
g14551	sp|A7S338|LIS1_NEMVE	-0.546025	-0.319247	Not Interesting
g14552	sp|Q4V842|GPTC4_XENLA	-0.617641	-0.379367	Not Interesting
g14566	sp|P59750|MERL_PAPAN	-0.728627	-0.0396493	Not Interesting
g14589	sp|Q96RW7|HMCN1_HUMAN	3.04074	2.80089	Not Interesting
g1460	sp|Q9DBU3|RIOK3_MOUSE	1.33194	0.996597	Not Interesting
g1461	NA	5.11649	4.59365	Not Interesting
g14615	sp|Q6DJ25|MED10_XENTR	-0.115599	-0.903062	Not Interesting
g14617	NA	-0.880931	-0.529533	Not Interesting
g1467	sp|E1BYJ2|MSH6_CHICK	-0.612217	0.0103907	Not Interesting
g14685	sp|Q08E39|SPY2_BOVIN	1.06918	1.11252	Not Interesting
g14687	NA	0.587727	2.13307	Not Interesting
g14688	sp|Q54TL0|KIF7_DICDI	1.61257	1.50841	Not Interesting
g1470	sp|P52701|MSH6_HUMAN	-0.62823	0.10583	Not Interesting
g14703	sp|O70237|GFI1B_MOUSE	0.599877	0.24892	Not Interesting
g14728	NA	1.97653	0.58286	Not Interesting
g14732	sp|Q400C7|AMZ2_RAT	1.03925	0.911083	Not Interesting
g14737	sp|Q9P2N4|ATS9_HUMAN	1.50901	0.366766	Not Interesting
g14748	sp|Q9Y490|TLN1_HUMAN	0.494378	1.40898	Not Interesting
g14795	sp|Q8JGW0|TSP4B_DANRE	-1.14684	-1.2152	Not Interesting
g14799	sp|Q86TX2|ACOT1_HUMAN	1.81047	1.73371	Not Interesting
g14800	sp|Q8CGB3|UACA_MOUSE	2.07716	2.27126	Not Interesting
g14801	sp|Q80WQ9|ZBED4_MOUSE	2.37177	1.76108	Not Interesting
g14802	NA	-1.79133	-1.44885	Not Interesting
g14810	NA	-1.86507	-2.69406	Not Interesting
g14812	NA	-2.88599	-2.4828	Not Interesting
g14831	sp|B0UYT5|MFD6B_DANRE	-0.0993597	-1.37891	Not Interesting
g14837	sp|A1DWM3|MFSD6_PIG	-0.997104	-0.953435	Not Interesting
g14838	sp|Q8CBH5|MFSD6_MOUSE	-1.29853	-0.941515	Not Interesting
g14842	sp|Q60520|SIN3A_MOUSE	-0.487391	-0.350379	Not Interesting
g14844	sp|Q60520|SIN3A_MOUSE	-0.506838	-0.455076	Not Interesting
g14854	sp|Q9I9R3|S40A1_DANRE	-0.785663	-1.14117	Not Interesting
g14866	sp|P25931|NPYR_DROME	-1.43281	-1.23589	Not Interesting
g14867	sp|Q4V8T0|MIOX_DANRE	1.13479	0.732191	Not Interesting
g14868	sp|Q9QXN5|MIOX_MOUSE	0.835214	1.01302	Not Interesting
g14870	sp|Q10471|GALT2_HUMAN	0.539378	0.724569	Not Interesting
g14904	sp|Q9BT88|SYT11_HUMAN	0.488257	0.316876	Not Interesting
g14919	sp|P29314|RS9_RAT	-1.15619	0.0635214	Not Interesting
g14936	sp|Q5SUF2|LC7L3_MOUSE	-0.932837	-0.493208	Not Interesting
g14938	sp|O15169|AXIN1_HUMAN	-0.496167	0.0502898	Not Interesting
g14947	sp|P16425|Y2R2_DROME	1.48236	0.953218	Not Interesting
g14950	NA	0.79748	0.996495	Not Interesting
g14956	sp|B0G143|UCPB_DICDI	-0.914921	-0.465594	Not Interesting
g14966	sp|O88664|TAOK1_RAT	-0.951886	-0.0724709	Not Interesting
g14978	NA	2.12501	1.72278	Not Interesting
g14979	NA	1.25365	1.99067	Not Interesting
g15008	sp|Q62985|SH2B1_RAT	-0.696888	-0.0369357	Not Interesting
g15012	sp|Q8N653|LZTR1_HUMAN	-0.966539	-0.620583	Not Interesting
g15028	NA	5.12901	7.23728	Not Interesting
g15029	sp|P54632|1433_DICDI	0.983673	0.476007	Not Interesting
g15030	NA	0.780845	0.26908	Not Interesting
g15066	sp|Q8CEE6|PASK_MOUSE	1.04332	0.201208	Not Interesting
g15075	sp|Q3KR86|MIC60_RAT	0.939531	0.0194228	Not Interesting
g15080	sp|Q6ZMG9|CERS6_HUMAN	1.17828	0.537113	Not Interesting
g15111	sp|Q767K6|DHX16_PIG	-0.808298	-0.330128	Not Interesting
g15127	NA	1.55383	-0.407541	Not Interesting
g15129	sp|P32020|NLTP_MOUSE	0.871595	0.321534	Not Interesting
g1513	sp|Q08699|RS14_PODCA	-0.999999	-0.292144	Not Interesting
g15133	sp|Q6MG82|PRRT1_RAT	0.615996	0.585799	Not Interesting
g15140	NA	1.54962	0.560954	Not Interesting
g15141	sp|A4IG66|TM201_DANRE	-1.35795	-1.01505	Not Interesting
g15145	NA	1.98355	1.57963	Not Interesting
g1515	sp|P28334|5HT1B_MOUSE	-2.09429	-1.38287	Not Interesting
g15159	sp|Q539E5|APX1_HYDVD	-1.33467	-1.75983	Not Interesting
g1517	sp|A7SD85|CDC5L_NEMVE	-0.737138	-0.150678	Not Interesting
g1518	sp|Q8IN94|OSA_DROME	-0.372075	-0.237158	Not Interesting
g15181	sp|Q3SZE3|PLPP3_BOVIN	3.19657	2.54658	Not Interesting
g152	NA	1.06814	0.406499	Not Interesting
g1520	sp|O95477|ABCA1_HUMAN	1.82349	1.58432	Not Interesting
g1521	sp|Q9BZC7|ABCA2_HUMAN	1.21312	1.75321	Not Interesting
g15212	NA	-3.207	-3.65414	Not Interesting
g15221	sp|Q8NHS3|MFSD8_HUMAN	3.0031	2.60825	Not Interesting
g15223	sp|Q8BH31|MFSD8_MOUSE	-1.4443	-1.69707	Not Interesting
g15226	sp|A6YP92|ARX_RAT	-1.53197	-1.41338	Not Interesting
g15242	sp|O08726|GALR2_RAT	-0.711588	-1.19762	Not Interesting
g15263	sp|Q9FIV6|DGP10_ARATH	-0.693916	-0.00935493	Not Interesting
g15293	sp|Q98TB4|GDF8_OREMO	-0.462462	-0.708424	Not Interesting
g15303	NA	4.40585	3.07673	Not Interesting
g15321	sp|D3YUG0|SAM13_MOUSE	-0.985541	-0.331866	Not Interesting
g15331	sp|Q3T0J1|FBX4_BOVIN	2.43871	1.71534	Not Interesting
g15344	NA	-0.654289	-1.01165	Not Interesting
g15345	sp|Q6GN42|CTL4_XENLA	0.848072	0.699997	Not Interesting
g15359	sp|O60481|ZIC3_HUMAN	-0.787123	-0.616824	Not Interesting
g1536	sp|Q8TBE9|NANP_HUMAN	1.31852	0.506225	Not Interesting
g15360	sp|Q99941|ATF6B_HUMAN	0.729004	0.292243	Not Interesting
g15365	NA	0.743478	0.65238	Not Interesting
g15366	sp|Q569B9|CK065_RAT	1.26028	1.4604	Not Interesting
g15378	sp|A0A0G2JZ79|SIR1_RAT	-0.406768	-0.684739	Not Interesting
g15382	sp|Q6ZSS7|MFSD6_HUMAN	-0.582274	-0.848152	Not Interesting
g15387	sp|Q566X8|DMX1B_DANRE	1.30134	-0.1861	Not Interesting
g15389	sp|Q682T9|CALM5_ARATH	0.957314	0.183383	Not Interesting
g154	sp|P11680|PROP_MOUSE	-2.23101	-1.6846	Not Interesting
g15408	sp|Q5RES1|MMP14_PONAB	0.948338	0.975107	Not Interesting
g15442	NA	0.790921	0.708509	Not Interesting
g15450	sp|F1LZF0|KLHL2_RAT	-0.692272	-0.399255	Not Interesting
g15451	sp|P47799|FSHR_HORSE	4.15131	4.60455	Not Interesting
g15457	sp|O35815|ATX3_RAT	0.466098	0.749845	Not Interesting
g15465	sp|Q9BST9|RTKN_HUMAN	0.501203	0.559864	Not Interesting
g15491	sp|Q8N0X2|SPG16_HUMAN	-0.432322	-0.429117	Not Interesting
g15493	sp|Q8VHI3|OFUT2_MOUSE	0.475936	0.074897	Not Interesting
g15494	sp|Q8N2E2|VWDE_HUMAN	2.39104	2.75871	Not Interesting
g15496	NA	2.23607	1.39066	Not Interesting
g15497	NA	-1.834	-0.0612684	Not Interesting
g15515	sp|Q5RFT1|S35F6_PONAB	-0.585848	-0.476197	Not Interesting
g15566	NA	2.43529	1.37219	Not Interesting
g15585	NA	2.13633	2.06661	Not Interesting
g156	NA	-1.35851	-1.90206	Not Interesting
g15603	sp|Q9QYF1|RDH11_MOUSE	0.468316	0.116358	Not Interesting
g15617	sp|P69929|TX9A_ANTMC	-1.82877	-0.0738547	Not Interesting
g1562	sp|Q8WVB3|HEXDC_HUMAN	0.615227	0.306492	Not Interesting
g15620	NA	-1.38042	-1.47566	Not Interesting
g15629	sp|P18519|TNR16_CHICK	2.03266	2.24502	Not Interesting
g15630	sp|H2A0N9|KCP4_PINMG	5.00312	4.52278	Not Interesting
g15633	sp|Q178A5|UFC1_AEDAE	0.747357	-0.00398626	Not Interesting
g15640	sp|Q9YIB7|ZIC2B_XENLA	-1.27235	-1.24543	Not Interesting
g15654	sp|Q7Z494|NPHP3_HUMAN	-0.668487	-1.77131	Not Interesting
g15676	sp|Q9QY94|GLNA_ACOCA	-1.58331	-2.07932	Not Interesting
g15679	NA	1.22427	0.795485	Not Interesting
g15689	sp|A3QJU3|COQ8B_DANRE	-2.54775	-0.0327292	Not Interesting
g15690	sp|Q20191|NAS13_CAEEL	-0.984741	-0.68613	Not Interesting
g15717	sp|O60268|K0513_HUMAN	0.784284	0.508582	Not Interesting
g15732	sp|G3XCN6|BETS_RHIML	-0.607736	-0.825021	Not Interesting
g15743	sp|P51423|RL40_BRARP	-0.702887	-0.817438	Not Interesting
g15760	sp|A6QL92|S35F5_BOVIN	-0.908601	-0.917105	Not Interesting
g15773	NA	0.295719	0.791137	Not Interesting
g15797	sp|Q9H7F0|AT133_HUMAN	1.26544	1.19625	Not Interesting
g15798	sp|Q09575|YRD6_CAEEL	1.86386	1.12575	Not Interesting
g15810	sp|Q9QYS2|GRM3_MOUSE	-1.46598	-2.70063	Not Interesting
g15817	sp|Q9JMD3|PCTL_MOUSE	0.634979	0.502122	Not Interesting
g15826	sp|Q16659|MK06_HUMAN	-0.598987	-1.5134	Not Interesting
g15840	sp|Q29H56|MAB21_DROPS	2.42285	2.30281	Not Interesting
g15869	NA	1.30177	0.685231	Not Interesting
g15882	sp|Q9Z1N9|UN13B_MOUSE	-0.546488	-0.230086	Not Interesting
g15894	sp|B5ZYI7|DUT_RHILW	3.15823	2.672	Not Interesting
g15897	sp|P28818|RGRF1_RAT	-1.00507	-0.442342	Not Interesting
g15907	sp|O43581|SYT7_HUMAN	-0.516899	-0.399308	Not Interesting
g1591	sp|Q01973|ROR1_HUMAN	-1.03247	-0.642857	Not Interesting
g15914	NA	2.01441	-0.0738879	Not Interesting
g15936	NA	0.543012	1.63757	Not Interesting
g15938	sp|P25286|VPP1_RAT	-0.540403	-0.0625458	Not Interesting
g15943	sp|A2AG06|MEIOC_MOUSE	-0.588058	-0.151614	Not Interesting
g15952	NA	2.64891	2.27704	Not Interesting
g15980	sp|Q8IVL0|NAV3_HUMAN	-0.76607	-0.608498	Not Interesting
g15983	sp|A6QQ71|FKBP6_BOVIN	-0.667393	-0.601386	Not Interesting
g15985	sp|Q496Y0|LONF3_HUMAN	0.900344	0.633731	Not Interesting
g15989	NA	0.107199	-0.920108	Not Interesting
g15991	sp|B5DFQ4|RHG26_XENTR	-0.508397	-0.274156	Not Interesting
g15997	sp|P51611|HCFC1_MESAU	-0.510215	-0.457495	Not Interesting
g16013	sp|Q9H237|PORCN_HUMAN	1.93545	0.198257	Not Interesting
g16024	sp|Q5SVZ6|ZMYM1_HUMAN	0.62505	0.626916	Not Interesting
g16028	sp|P14099|PDE2A_BOVIN	0.704691	0.756979	Not Interesting
g16030	sp|Q9SZJ2|GRDP2_ARATH	0.976566	1.06142	Not Interesting
g16038	sp|Q60809|CNOT7_MOUSE	0.523828	0.0443856	Not Interesting
g1605	sp|Q6P0Q8|MAST2_HUMAN	0.347571	0.640521	Not Interesting
g16071	sp|Q9LVK9|ALA7_ARATH	1.52964	1.36994	Not Interesting
g16072	sp|Q58DT4|P5CR1_BOVIN	-1.20509	-1.41074	Not Interesting
g16073	NA	-0.748117	0.273543	Not Interesting
g1608	sp|P98155|VLDLR_HUMAN	0.447224	0.414577	Not Interesting
g16086	sp|Q9WV54|ASAH1_MOUSE	-0.403937	-0.503129	Not Interesting
g16122	sp|Q7ZV60|BCS1_DANRE	-1.06588	-0.0878477	Not Interesting
g16132	NA	1.0447	0.0522964	Not Interesting
g16168	sp|Q90593|GRP78_CHICK	0.35624	0.667319	Not Interesting
g16182	sp|Q8CGA3|LAT4_MOUSE	1.27341	0.0236203	Not Interesting
g16194	sp|Q0IES8|MAB21_AEDAE	-1.38242	-0.937082	Not Interesting
g16196	sp|Q0IES8|MAB21_AEDAE	-0.810092	-1.5174	Not Interesting
g16200	sp|Q0IES8|MAB21_AEDAE	-0.281823	-0.455211	Not Interesting
g16204	sp|D3YXG0|HMCN1_MOUSE	2.0162	1.58288	Not Interesting
g16214	sp|D3ZHS6|BAP1_RAT	-0.487638	-0.47792	Not Interesting
g16224	sp|Q96P65|QRFPR_HUMAN	1.54963	1.06727	Not Interesting
g16233	sp|Q96P65|QRFPR_HUMAN	-0.863076	-0.633872	Not Interesting
g1624	sp|Q61115|PTC1_MOUSE	1.56275	1.27948	Not Interesting
g16242	NA	0.883739	0.436244	Not Interesting
g1625	NA	1.15493	0.481089	Not Interesting
g16251	sp|Q28GD4|ELAV2_XENTR	-0.577447	-0.116204	Not Interesting
g16255	sp|Q1RLY6|KMO_DANRE	-0.510605	-0.585833	Not Interesting
g16258	sp|Q9BZJ0|CRNL1_HUMAN	-0.51948	-0.345575	Not Interesting
g16274	sp|P61244|MAX_HUMAN	-2.5675	-0.0458386	Not Interesting
g16279	NA	2.25515	1.42569	Not Interesting
g16299	sp|Q9QWG7|ST1B1_MOUSE	-1.60188	-1.35022	Not Interesting
g16307	sp|Q9M2U3|ALPL_ARATH	0.381133	0.623787	Not Interesting
g16321	NA	1.06645	0.0686081	Not Interesting
g16322	sp|P46419|GSTM1_DERPT	-0.832715	-0.140015	Not Interesting
g16339	sp|Q5T197|DCST1_HUMAN	-0.471492	-0.701792	Not Interesting
g16379	sp|Q0V9S9|DRC7_XENTR	0.706942	0.971666	Not Interesting
g16387	sp|Q9UPR0|PLCL2_HUMAN	-0.408908	-0.15815	Not Interesting
g16394	sp|Q62431|ARI3A_MOUSE	-0.1593	-1.09741	Not Interesting
g16412	NA	1.45864	1.39622	Not Interesting
g16428	sp|P81900|KAPR2_DROME	-0.877033	-0.523181	Not Interesting
g16439	sp|Q6AZT7|NPHP3_XENLA	1.30723	0.214321	Not Interesting
g16442	sp|Q05826|CEBPB_CHICK	1.97124	1.84037	Not Interesting
g1646	NA	-0.419881	-0.561584	Not Interesting
g16491	sp|P51984|CREB_HYDVD	1.55962	1.90292	Not Interesting
g16493	NA	6.28752	3.95248	Not Interesting
g16500	sp|P46824|KLC_DROME	-0.85643	-1.62282	Not Interesting
g16529	sp|Q561Q8|MED4_RAT	-0.688786	-0.336717	Not Interesting
g16530	NA	1.94186	2.71117	Not Interesting
g16533	sp|Q8VHV8|SELS_RAT	0.691103	0.14432	Not Interesting
g16535	sp|Q8NEZ2|VP37A_HUMAN	1.11664	0.384263	Not Interesting
g16542	sp|Q9DBS5|KLC4_MOUSE	1.54282	0.486265	Not Interesting
g16547	sp|Q6PBF0|RL8_XENTR	-0.845881	-0.290749	Not Interesting
g16552	sp|O43639|NCK2_HUMAN	-0.263006	-0.425762	Not Interesting
g16553	sp|O00410|IPO5_HUMAN	-0.608499	-0.0519813	Not Interesting
g16557	sp|Q09604|VAB15_CAEEL	-1.62561	-1.20823	Not Interesting
g16559	sp|Q5RED8|CYLD_PONAB	0.749082	0.178538	Not Interesting
g16569	sp|Q9NRH2|SNRK_HUMAN	-0.799502	-0.668136	Not Interesting
g16572	sp|Q8NDA8|MROH1_HUMAN	-0.476491	-0.027716	Not Interesting
g16574	sp|Q0V8T0|CNTP5_CANLF	-0.203987	-0.62139	Not Interesting
g16590	NA	4.6128	0.893787	Not Interesting
g16599	sp|C6FG12|NLRC5_ICTPU	1.88976	1.09981	Not Interesting
g16628	sp|P54846|NRL_MOUSE	1.14716	0.670787	Not Interesting
g16632	NA	-0.165055	-0.662791	Not Interesting
g16649	sp|Q95R48|OCTL_DROME	1.43601	0.189327	Not Interesting
g16665	NA	1.24174	0.493744	Not Interesting
g16689	sp|B5KFD7|GRB10_PIG	-0.59624	-0.511651	Not Interesting
g16698	sp|P79777|BRAC_CHICK	1.27149	3.13795	Not Interesting
g16699	sp|Q5ZIL4|STRBP_CHICK	-0.784423	-0.0388842	Not Interesting
g16709	sp|Q9SS86|LHTL4_ARATH	-0.727554	-0.583321	Not Interesting
g16715	sp|Q9JJP9|UBQL1_RAT	-0.633802	-0.201466	Not Interesting
g16743	NA	-0.728668	-0.534893	Not Interesting
g16755	sp|Q09328|MGT5A_HUMAN	0.577767	0.25226	Not Interesting
g16762	sp|Q7Z494|NPHP3_HUMAN	-2.06232	-1.03485	Not Interesting
g16771	NA	-0.78936	-1.06278	Not Interesting
g16772	sp|P08155|KRH1_DROME	-0.753887	-0.599831	Not Interesting
g16782	sp|Q6GPB8|DBR1A_XENLA	-0.435124	-0.323619	Not Interesting
g16786	NA	0.630197	0.174118	Not Interesting
g16788	NA	-0.70561	-0.803021	Not Interesting
g16791	sp|Q6PCX7|RGMA_MOUSE	-0.48897	-0.925707	Not Interesting
g16794	sp|P12890|AMDB_XENLA	0.881005	0.33707	Not Interesting
g16798	sp|Q8TDJ6|DMXL2_HUMAN	-0.488456	-0.0754033	Not Interesting
g16826	NA	1.17912	0.335991	Not Interesting
g16833	sp|Q5SVZ6|ZMYM1_HUMAN	1.46998	1.29677	Not Interesting
g16834	sp|P40925|MDHC_HUMAN	-0.787007	0.0738058	Not Interesting
g16842	sp|Q11126|FUT3_BOVIN	-0.339955	-0.673116	Not Interesting
g16847	sp|Q11126|FUT3_BOVIN	1.20511	1.43254	Not Interesting
g16853	NA	-1.21046	-0.919029	Not Interesting
g16860	sp|A2RRD8|ZN320_HUMAN	-0.483956	-0.17968	Not Interesting
g16879	sp|Q9VSF3|UBC12_DROME	3.34005	2.5261	Not Interesting
g16882	NA	6.07304	6.72312	Not Interesting
g1689	sp|Q8BHA0|IN80C_MOUSE	-1.95596	0.96853	Not Interesting
g16930	NA	1.04776	0.828993	Not Interesting
g16973	sp|Q6WZ18|NGB_CANLF	10.7694	7.56991	Not Interesting
g17039	NA	-1.83533	0.584117	Not Interesting
g17040	NA	1.16309	0.661067	Not Interesting
g17041	sp|Q00725|SGS4_DROME	-1.56947	0.0149661	Not Interesting
g17042	sp|Q8IZF6|AGRG4_HUMAN	-1.35703	0.365128	Not Interesting
g17050	NA	1.32216	0.856482	Not Interesting
g17058	sp|Q9I8C7|ACH10_CHICK	-0.589859	-0.900423	Not Interesting
g17059	sp|O75970|MPDZ_HUMAN	-0.531091	-0.218064	Not Interesting
g1707	sp|P34975|OPRK_RAT	-0.943915	-2.95584	Not Interesting
g1708	sp|C8YR32|LOXH1_MOUSE	-1.28166	-0.705583	Not Interesting
g17080	sp|Q12933|TRAF2_HUMAN	3.36502	3.07583	Not Interesting
g1715	sp|Q9GZR5|ELOV4_HUMAN	1.06102	0.675648	Not Interesting
g17154	sp|Q9EPB1|DPP2_RAT	-0.53397	-0.381827	Not Interesting
g17160	NA	-1.44234	-0.366563	Not Interesting
g17167	sp|Q5S006|LRRK2_MOUSE	1.39913	1.1422	Not Interesting
g17177	sp|Q9CXY1|TM175_MOUSE	3.08509	1.4134	Not Interesting
g17179	sp|A5PN43|TM175_DANRE	-0.81207	-1.34344	Not Interesting
g1718	sp|P69478|CHSTB_RAT	6.11278	5.23031	Not Interesting
g17186	sp|Q96LT4|SAMD8_HUMAN	0.105857	0.594859	Not Interesting
g17196	sp|Q6NRT3|SMU1_XENLA	-0.615398	-0.0636367	Not Interesting
g172	sp|Q9Y6M5|ZNT1_HUMAN	1.15252	1.09804	Not Interesting
g17208	sp|A2VDU3|M3K7_BOVIN	-0.429243	-0.812597	Not Interesting
g17235	sp|Q9N294|B3GT5_PANPA	1.23112	0.25233	Not Interesting
g17237	sp|Q3USF0|B3GN6_MOUSE	0.666538	0.231545	Not Interesting
g17238	sp|Q9Z0Y8|CAC1I_RAT	-0.779608	-0.669134	Not Interesting
g17243	sp|Q9H5L6|THAP9_HUMAN	1.91871	0.0155081	Not Interesting
g17270	sp|P00630|PA2_APIME	0.794583	0.479918	Not Interesting
g17271	sp|O00418|EF2K_HUMAN	-0.523585	-0.150856	Not Interesting
g1728	NA	1.8315	1.17285	Not Interesting
g17289	sp|Q10741|ADA10_BOVIN	0.689252	0.652753	Not Interesting
g17327	NA	0.740041	0.224728	Not Interesting
g17347	NA	-1.0662	-0.829217	Not Interesting
g17348	sp|A0A0K3AWM6|MOM5_CAEEL	-1.31782	-1.01055	Not Interesting
g17349	sp|P62293|ASPM_PANTR	-1.51289	-0.983904	Not Interesting
g17364	sp|Q9VZF4|FBXW7_DROME	-0.383198	-0.435315	Not Interesting
g17371	sp|Q5F408|SYCC_CHICK	0.351776	0.510169	Not Interesting
g17406	sp|Q0V9K5|RFX3_XENTR	-0.727196	-0.205087	Not Interesting
g1741	sp|Q2KNE5|OPN4A_DANRE	3.17776	2.73579	Not Interesting
g17410	NA	1.41615	0.597372	Not Interesting
g1742	sp|Q5XXP2|OPN4_PHOSU	0.572123	1.02271	Not Interesting
g17452	NA	1.04881	0.36375	Not Interesting
g17460	sp|Q9I9M5|FZD1_XENLA	-0.330759	-0.717638	Not Interesting
g17462	NA	2.23671	1.19349	Not Interesting
g17469	NA	2.08264	1.82405	Not Interesting
g17470	NA	3.2538	2.15618	Not Interesting
g17479	sp|Q3UHD1|BAI1_MOUSE	-0.73923	-0.812308	Not Interesting
g17491	sp|E2JA28|DDAC_ENTAG	-1.42988	-1.16949	Not Interesting
g17506	sp|P54707|AT12A_HUMAN	7.03479	5.43945	Not Interesting
g17519	sp|Q9JJX8|ST32B_MOUSE	1.25239	1.06288	Not Interesting
g1752	sp|Q8TAA9|VANG1_HUMAN	-0.507778	-0.81035	Not Interesting
g17522	sp|Q9JJX8|ST32B_MOUSE	2.16099	1.27248	Not Interesting
g17565	sp|Q29611|CLN3_CANLF	-0.0316958	-0.91105	Not Interesting
g17584	sp|Q9UNQ0|ABCG2_HUMAN	-0.463651	-0.417066	Not Interesting
g17588	sp|P70426|RIT1_MOUSE	0.810439	0.6535	Not Interesting
g17604	sp|O75762|TRPA1_HUMAN	0.715648	0.720474	Not Interesting
g17620	sp|Q94BZ1|ZIFL1_ARATH	0.649465	0.290226	Not Interesting
g17639	sp|O96005|CLPT1_HUMAN	0.833695	-0.0336033	Not Interesting
g17668	sp|Q803X1|CTU1_DANRE	-0.470357	-0.157438	Not Interesting
g17690	sp|P33316|DUT_HUMAN	0.742065	0.0526435	Not Interesting
g17704	sp|Q27433|MEC2_CAEEL	-0.148701	-0.487967	Not Interesting
g17768	NA	-0.53211	-0.564196	Not Interesting
g17776	NA	-0.224481	-1.16235	Not Interesting
g17783	sp|Q8K4H1|KFA_MOUSE	-2.45259	-1.55071	Not Interesting
g17793	sp|Q19673|TYR3_CAEEL	-0.55746	-0.548504	Not Interesting
g17801	sp|Q9Y4B6|VPRBP_HUMAN	-0.610657	-0.0200984	Not Interesting
g17803	NA	-0.662274	-0.642744	Not Interesting
g17812	sp|G5EER4|FCL_CAEEL	0.641383	-0.01062	Not Interesting
g17829	sp|P12394|CP17A_CHICK	-1.41861	-1.93638	Not Interesting
g17831	sp|Q8MPM1|GELS2_LUMTE	-0.346854	-0.277961	Not Interesting
g17835	sp|O73853|CP17A_ICTPU	-0.903245	-0.574234	Not Interesting
g17845	sp|Q61139|PCSK7_MOUSE	0.596567	0.228878	Not Interesting
g17848	sp|Q92481|AP2B_HUMAN	-2.18871	-1.80951	Not Interesting
g17880	sp|Q2PFN5|SPY2_MACFA	3.2981	2.11056	Not Interesting
g17889	sp|Q93YS4|AB22G_ARATH	0.876069	0.169236	Not Interesting
g17902	sp|Q90YT3|RL35A_ICTPU	-1.33497	0.565259	Not Interesting
g17905	sp|Q75N90|FBN3_HUMAN	-1.09979	-1.11552	Not Interesting
g17908	sp|Q75N90|FBN3_HUMAN	3.75128	4.10075	Not Interesting
g17909	sp|Q9TTC1|POL_KORV	1.51305	3.5257	Not Interesting
g17917	sp|Q27052|FCA1_TRYRA	0.0536861	-0.628319	Not Interesting
g17928	NA	-0.489711	0.0304847	Not Interesting
g17929	NA	2.52361	1.82483	Not Interesting
g17940	sp|Q24799|MYPH_ECHGR	-0.356498	-0.560157	Not Interesting
g17949	sp|Q7Z494|NPHP3_HUMAN	-0.554563	-1.52911	Not Interesting
g17959	NA	0.0109849	-0.706734	Not Interesting
g17960	NA	-0.311424	-1.14014	Not Interesting
g17961	sp|A9CB25|S22A4_PAPAN	0.75074	1.61241	Not Interesting
g17970	sp|Q9WTN6|S22AL_MOUSE	-0.543529	-1.06337	Not Interesting
g17979	sp|P02510|CRYAB_BOVIN	1.50834	1.62483	Not Interesting
g17983	sp|P23928|CRYAB_RAT	-0.347252	-1.0901	Not Interesting
g17988	sp|P02510|CRYAB_BOVIN	2.5533	2.94389	Not Interesting
g17997	sp|Q5Y8D6|PERI_HYDVU	-2.34197	-1.0674	Not Interesting
g17998	sp|P02510|CRYAB_BOVIN	1.17363	0.952169	Not Interesting
g18011	sp|P08645|RAS3_DROME	-1.57908	-1.37454	Not Interesting
g18017	sp|Q11128|FUT5_HUMAN	0.759094	0.45125	Not Interesting
g18022	NA	0.581895	0.161439	Not Interesting
g18029	NA	1.42211	0.527549	Not Interesting
g18035	NA	1.88115	-0.105117	Not Interesting
g18065	sp|O95639|CPSF4_HUMAN	-0.638036	-0.326355	Not Interesting
g18067	sp|Q9H0J4|QRIC2_HUMAN	-0.868862	-0.573658	Not Interesting
g18085	sp|Q9DGD1|MGT4C_CHICK	1.34638	1.05841	Not Interesting
g18086	sp|Q4R854|MGT4A_MACFA	0.528884	0.652213	Not Interesting
g18094	sp|Q9NBX4|RTXE_DROME	1.69829	1.40237	Not Interesting
g181	sp|Q60738|ZNT1_MOUSE	1.99436	1.46107	Not Interesting
g18100	sp|Q9Y466|NR2E1_HUMAN	1.06241	0.452292	Not Interesting
g18105	sp|O46606|DDHD1_BOVIN	-0.764351	-0.435261	Not Interesting
g18118	sp|O46606|DDHD1_BOVIN	-0.650567	-0.279229	Not Interesting
g18119	sp|Q86W92|LIPB1_HUMAN	-0.331796	-0.359166	Not Interesting
g18145	sp|P14381|YTX2_XENLA	1.44612	1.13875	Not Interesting
g18146	NA	1.84369	1.95508	Not Interesting
g18200	sp|Q99578|RIT2_HUMAN	1.63539	1.42603	Not Interesting
g18215	sp|Q9BQS2|SYT15_HUMAN	2.02017	1.34461	Not Interesting
g18219	NA	-2.37314	0.728844	Not Interesting
g18221	NA	-0.842237	-0.591998	Not Interesting
g18228	sp|Q5G872|SCUB2_DANRE	-1.05095	-0.566831	Not Interesting
g18229	NA	-0.887609	-0.74187	Not Interesting
g18231	sp|Q96RW7|HMCN1_HUMAN	-1.06507	-0.973697	Not Interesting
g18232	sp|Q9Y2U5|M3K2_HUMAN	0.602571	0.404616	Not Interesting
g1824	sp|Q9ES74|NEK7_MOUSE	-0.328619	-0.713316	Not Interesting
g18245	sp|P53772|DLLH_BRAFL	-0.60125	-0.780714	Not Interesting
g18247	sp|B4F769|SMAL1_RAT	0.769435	-0.112998	Not Interesting
g18249	sp|F6V515|MTAP_XENTR	-0.256494	-0.449752	Not Interesting
g18250	sp|Q5ZJU3|ASNS_CHICK	-0.607125	-0.396206	Not Interesting
g18264	sp|Q5BL35|SPOLA_DANRE	1.65073	-0.357568	Not Interesting
g18297	sp|Q08790|BLC_VIBCH	-0.763949	-0.546163	Not Interesting
g18300	NA	2.31525	2.14848	Not Interesting
g18301	sp|Q5ZKL6|MBOA2_CHICK	-0.91787	-0.931838	Not Interesting
g18304	NA	2.55055	1.66832	Not Interesting
g18318	sp|Q95136|DRD1_BOVIN	-0.985401	-1.27715	Not Interesting
g18321	NA	1.06609	1.29206	Not Interesting
g18355	sp|Q9NR30|DDX21_HUMAN	-0.388852	-0.129729	Not Interesting
g1836	sp|Q8AWH3|SX17A_XENTR	-1.81932	-1.72044	Not Interesting
g18361	sp|Q6FP38|DBP1_CANGA	-1.50022	-1.29076	Not Interesting
g18364	sp|Q90596|MAFK_CHICK	0.986574	0.0760543	Not Interesting
g18365	sp|P29341|PABP1_MOUSE	-0.436701	-0.234224	Not Interesting
g18368	NA	1.46581	-0.115802	Not Interesting
g18369	NA	1.66631	-0.483378	Not Interesting
g18376	sp|A7SCH8|KYNU_NEMVE	1.97635	1.76987	Not Interesting
g18399	sp|Q8N118|CP4X1_HUMAN	3.63413	2.67869	Not Interesting
g184	sp|P19440|GGT1_HUMAN	1.28138	0.691422	Not Interesting
g18414	sp|Q5XGG5|CCNF_XENTR	-0.632384	-0.432459	Not Interesting
g18417	sp|Q7Z9I3|YCP8_SCHPO	-0.522568	-0.303544	Not Interesting
g18420	NA	-0.813125	-0.850184	Not Interesting
g18432	NA	-0.622328	-0.779974	Not Interesting
g18436	sp|Q6AXS4|RENR_RAT	0.462779	0.14648	Not Interesting
g18439	NA	-2.22713	-1.74776	Not Interesting
g18445	sp|Q64362|AKTIP_MOUSE	0.788381	0.396772	Not Interesting
g18449	sp|Q86SQ0|PHLB2_HUMAN	-1.34749	-0.84334	Not Interesting
g18466	sp|P07524|TYRO_STRAT	8.27752	8.30988	Not Interesting
g18467	sp|Q9Y5P8|P2R3B_HUMAN	1.50164	1.071	Not Interesting
g18468	sp|Q06190|P2R3A_HUMAN	1.95139	0.385276	Not Interesting
g18475	sp|Q5TJ56|FORF_DICDI	-1.37814	-1.22124	Not Interesting
g18477	sp|Q5TJ56|FORF_DICDI	-0.725578	-0.807899	Not Interesting
g18478	sp|Q9CXV1|DHSD_MOUSE	-1.48089	0.412084	Not Interesting
g18479	sp|Q924A2|CIC_MOUSE	1.02128	0.748509	Not Interesting
g18487	sp|Q6P6J4|ALKB2_MOUSE	1.40923	0.0639421	Not Interesting
g18496	sp|Q61772|EPHA7_MOUSE	-0.419652	-0.160997	Not Interesting
g18499	NA	2.49242	1.61459	Not Interesting
g18515	sp|Q5BJQ6|CSTF1_RAT	-0.509741	-0.352349	Not Interesting
g18534	sp|Q8BJQ9|CGAT1_MOUSE	-0.178354	-0.557402	Not Interesting
g18539	sp|Q68SA9|ATS7_MOUSE	1.07634	0.831825	Not Interesting
g18549	NA	-1.30949	-1.22537	Not Interesting
g18551	NA	-1.2882	-1.25659	Not Interesting
g18553	sp|B1H283|LEXM_RAT	-0.711614	-1.31622	Not Interesting
g18571	sp|Q9H2X6|HIPK2_HUMAN	-0.468608	-0.0638012	Not Interesting
g1858	sp|Q2Z1R2|SOX1B_DANRE	-0.696224	-0.891649	Not Interesting
g18581	sp|Q5DU56|NLRC3_MOUSE	1.41448	0.393828	Not Interesting
g18700	sp|Q9QXM0|ABHD2_MOUSE	1.30287	0.977229	Not Interesting
g18702	sp|Q6PBQ2|CHMP7_DANRE	1.28472	0.904673	Not Interesting
g18713	sp|Q8QHI3|ARL3_XENLA	1.0296	0.140836	Not Interesting
g18735	sp|A7Y2W8|SC6A9_XENLA	0.430258	0.295234	Not Interesting
g18739	sp|Q5SZK8|FREM2_HUMAN	1.44061	1.15976	Not Interesting
g1874	sp|P56945|BCAR1_HUMAN	0.61849	0.547094	Not Interesting
g18743	sp|Q5SZK8|FREM2_HUMAN	1.54612	1.28853	Not Interesting
g18751	sp|Q2WEA5|TRPM1_RAT	0.461384	0.216218	Not Interesting
g18765	NA	2.1498	0.444023	Not Interesting
g18779	sp|Q61041|NPY4R_MOUSE	-2.75912	-2.50848	Not Interesting
g18785	sp|P0C1J8|PIN1_RHIO9	-1.1426	-0.0442958	Not Interesting
g18806	sp|P0CB22|ATX2_ARATH	-0.786678	-0.742411	Not Interesting
g18807	sp|P49166|RL37A_YEAST	-1.02938	-0.458901	Not Interesting
g18817	sp|Q96E17|RAB3C_HUMAN	-0.978435	-1.09759	Not Interesting
g18818	sp|P10948|RAB3B_BOVIN	0.443009	0.19864	Not Interesting
g18842	sp|Q6DID7|WLS_MOUSE	3.79733	3.74325	Not Interesting
g18869	sp|Q8BGQ4|POMT2_MOUSE	-0.339684	-0.370135	Not Interesting
g18870	sp|A7S4N4|SERIC_NEMVE	0.963834	0.394548	Not Interesting
g18872	sp|B9VTT2|RHG07_CANLF	-0.31432	-0.303468	Not Interesting
g1888	sp|O62667|S28A1_PIG	1.00285	0.395229	Not Interesting
g18882	sp|Q64332|SYN2_MOUSE	-0.402355	-0.976781	Not Interesting
g18917	sp|Q16827|PTPRO_HUMAN	-0.591548	-0.788265	Not Interesting
g18936	sp|Q80X66|BTBDA_MOUSE	0.534502	0.413166	Not Interesting
g1894	NA	1.44085	0.911781	Not Interesting
g18947	sp|Q8NB14|UBP38_HUMAN	1.9242	1.49052	Not Interesting
g18951	sp|P38571|LICH_HUMAN	0.489073	0.601085	Not Interesting
g18961	sp|Q8WML3|KAT6B_MACFA	-0.476726	-0.133771	Not Interesting
g18969	sp|Q9UPZ9|ICK_HUMAN	1.07213	0.952312	Not Interesting
g1897	sp|Q8IV33|K0825_HUMAN	2.26069	1.06441	Not Interesting
g18979	sp|O94913|PCF11_HUMAN	0.175315	0.469202	Not Interesting
g18982	sp|P34908|BRAF_COTJA	-1.0249	-0.736198	Not Interesting
g18986	sp|P15056|BRAF_HUMAN	-0.964106	-0.955652	Not Interesting
g18988	sp|P84169|PSD13_CHICK	1.11511	0.0904696	Not Interesting
g19012	sp|Q7LL04|YQK1_SCHPO	0.418197	1.06782	Not Interesting
g19020	sp|Q9ERH3|WDR7_RAT	-0.736314	0.0325092	Not Interesting
g19035	sp|Q9M2U3|ALPL_ARATH	2.04136	1.05087	Not Interesting
g19043	sp|P61315|G3ST3_MOUSE	7.13671	5.74113	Not Interesting
g19046	sp|Q9H9S5|FKRP_HUMAN	2.08783	1.63252	Not Interesting
g19075	sp|P50616|TOB1_HUMAN	-0.553255	-0.445913	Not Interesting
g19082	sp|Q9CZT4|RPC5_MOUSE	-1.05577	-0.0862855	Not Interesting
g19087	sp|Q6ZWL3|CP4V2_HUMAN	1.01051	1.08552	Not Interesting
g19105	NA	1.44367	5.82022	Not Interesting
g19108	sp|Q6NWA8|TADA1_DANRE	-0.637097	-1.02256	Not Interesting
g19111	NA	-0.867127	-0.752889	Not Interesting
g19113	sp|Q9JMF7|DOPP1_MOUSE	-1.82428	0.695271	Not Interesting
g19119	sp|Q9N1F0|MRVI1_BOVIN	0.769453	1.01062	Not Interesting
g19142	NA	1.44229	1.43269	Not Interesting
g19151	sp|Q04886|SOX8_MOUSE	-0.659295	-0.448078	Not Interesting
g19154	sp|O43490|PROM1_HUMAN	1.55423	0.71909	Not Interesting
g19170	sp|Q8R081|HNRPL_MOUSE	-0.645692	-0.0197616	Not Interesting
g19184	NA	-1.44639	0.140316	Not Interesting
g19185	NA	-1.579	0.491611	Not Interesting
g19187	NA	1.86532	1.75383	Not Interesting
g19213	sp|Q8NHP8|PLBL2_HUMAN	-0.74388	-0.0710983	Not Interesting
g19215	NA	-0.173722	-0.688299	Not Interesting
g19216	sp|Q6GQB9|EDEM3_XENLA	0.957092	0.893681	Not Interesting
g19222	NA	1.29894	0.0873221	Not Interesting
g19230	sp|Q9EQX4|AIF1L_MOUSE	0.607941	0.10185	Not Interesting
g19235	sp|O94818|NOL4_HUMAN	-1.40654	-0.785248	Not Interesting
g1924	sp|P24399|ZN239_MOUSE	0.504494	0.250946	Not Interesting
g19249	NA	-1.02819	-0.478574	Not Interesting
g19252	sp|P72745|Y1101_SYNY3	0.652261	-0.281882	Not Interesting
g1926	sp|Q9R0U0|SRS10_MOUSE	-0.254722	-0.604175	Not Interesting
g19261	sp|Q04892|SOX14_MOUSE	-0.967013	-0.918742	Not Interesting
g19264	sp|P49657|MNB_DROME	0.383669	0.0923499	Not Interesting
g19271	sp|P04323|POL3_DROME	1.08692	0.815354	Not Interesting
g19275	sp|Q6NSM8|SIK3_DANRE	-0.623041	-0.505126	Not Interesting
g19277	NA	2.2132	1.89056	Not Interesting
g19288	sp|Q967D7|TUTL_DROME	0.561178	0.74924	Not Interesting
g19293	sp|Q99NH0|ANR17_MOUSE	-0.919338	-0.253591	Not Interesting
g19310	sp|Q01262|HYUA_PSESN	1.87535	1.53788	Not Interesting
g19315	sp|Q3TUF7|YETS2_MOUSE	-0.77579	-0.739904	Not Interesting
g19345	sp|Q8R4H2|ARHGC_MOUSE	-0.523569	0.025901	Not Interesting
g19352	sp|Q5W5U4|DDX4_BOVIN	-0.781188	-0.316659	Not Interesting
g19353	sp|Q3MSQ8|DDX4_PELLE	-0.720028	-0.269469	Not Interesting
g19354	NA	-1.92527	0.388506	Not Interesting
g19355	NA	3.67171	3.36954	Not Interesting
g19358	NA	1.02548	0.562388	Not Interesting
g19368	sp|Q12882|DPYD_HUMAN	-0.481753	-0.185437	Not Interesting
g19372	sp|Q14766|LTBP1_HUMAN	-1.27381	-0.320652	Not Interesting
g19392	sp|P96738|CAPA_BACSU	0.730749	0.013375	Not Interesting
g19401	sp|Q9JI85|NUCB2_RAT	0.362692	0.371601	Not Interesting
g19410	sp|Q9ES88|S13A2_MOUSE	-0.612806	-0.672837	Not Interesting
g1942	sp|Q6DHR8|NGBR_DANRE	0.86013	0.0475606	Not Interesting
g19421	sp|O08629|TIF1B_RAT	-1.61412	-1.50997	Not Interesting
g19422	NA	-1.1102	-1.74676	Not Interesting
g19441	sp|Q08E38|PRP19_BOVIN	-0.633394	0.0160991	Not Interesting
g19442	sp|Q9J569|V162_FOWPN	-0.78766	-0.674349	Not Interesting
g19444	sp|Q8K3J1|NDUS8_MOUSE	0.505433	-0.0657358	Not Interesting
g19454	sp|Q682T9|CALM5_ARATH	-1.38108	-1.23688	Not Interesting
g19457	sp|A1DWM3|MFSD6_PIG	-0.383633	-1.08221	Not Interesting
g19470	sp|Q91584|ELAV3_XENLA	-0.379077	-0.338873	Not Interesting
g19496	sp|P63255|CRIP1_RAT	0.983536	1.33542	Not Interesting
g195	sp|P19205|ACPH_PIG	0.582225	0.115263	Not Interesting
g19503	sp|O35491|CLK2_MOUSE	0.0133142	0.463496	Not Interesting
g19513	sp|Q8WQI5|RS8_SPOFR	-1.26844	0.364011	Not Interesting
g19524	sp|Q2KJJ8|PLD3_BOVIN	0.796994	0.714065	Not Interesting
g19531	NA	4.82391	4.29662	Not Interesting
g19557	sp|Q8N328|PGBD3_HUMAN	-0.300437	-0.968284	Not Interesting
g19568	NA	6.41439	3.5587	Not Interesting
g19572	sp|Q9R1T3|CATZ_RAT	-0.16621	-0.828576	Not Interesting
g19576	sp|Q9UBR2|CATZ_HUMAN	-0.874288	-0.178589	Not Interesting
g19595	sp|P52757|CHIO_HUMAN	0.873286	0.283871	Not Interesting
g19631	sp|P16423|POLR_DROME	0.835884	1.10825	Not Interesting
g19664	NA	0.593359	-0.265816	Not Interesting
g1967	sp|Q2TA16|CCD65_BOVIN	0.814377	0.645455	Not Interesting
g19672	sp|P30437|CP17A_ONCMY	1.26246	0.882603	Not Interesting
g19674	sp|P09917|LOX5_HUMAN	0.9364	0.790108	Not Interesting
g19675	sp|O16025|AOSL_PLEHO	0.839615	0.660383	Not Interesting
g1968	sp|Q6GPK9|TAOK2_XENLA	-1.07795	-1.17143	Not Interesting
g19689	sp|C0HK24|ELEL_ECHLU	-1.6717	-0.951889	Not Interesting
g1969	NA	3.23396	3.05082	Not Interesting
g1970	sp|Q9I9E0|TAOK3_CHICK	-1.5251	-0.794803	Not Interesting
g19701	NA	2.27707	1.01083	Not Interesting
g19719	NA	0.86784	0.589356	Not Interesting
g19728	NA	-3.23644	0.333218	Not Interesting
g19746	sp|P47739|AL3A1_MOUSE	0.615668	0.420001	Not Interesting
g19748	sp|Q7TNC4|LC7L2_MOUSE	-0.644044	-0.147772	Not Interesting
g19768	sp|P32254|RASS_DICDI	3.41546	3.52819	Not Interesting
g19776	sp|Q9NW08|RPC2_HUMAN	-1.03745	-0.457218	Not Interesting
g19781	NA	3.22068	3.00032	Not Interesting
g19818	sp|P15428|PGDH_HUMAN	-0.200898	-0.581907	Not Interesting
g19846	sp|Q64424|LIPR2_MYOCO	-0.731585	-0.241358	Not Interesting
g19853	NA	-0.783103	-0.191047	Not Interesting
g19870	sp|P27161|CALM_SOLLC	0.621341	0.443848	Not Interesting
g19875	sp|Q9Y2L6|FRM4B_HUMAN	1.28326	0.0583222	Not Interesting
g1988	sp|O75840|KLF7_HUMAN	-1.06242	-0.762501	Not Interesting
g19880	sp|P27545|CERS1_MOUSE	1.00463	0.131626	Not Interesting
g19890	NA	3.16294	2.27522	Not Interesting
g19909	sp|Q7ZVZ6|PREP_DANRE	-0.754611	-0.0658065	Not Interesting
g19915	sp|Q99704|DOK1_HUMAN	0.252696	0.593692	Not Interesting
g19927	sp|P06727|APOA4_HUMAN	2.32866	4.00522	Not Interesting
g19936	sp|Q8R0H9|GGA1_MOUSE	0.672099	0.577556	Not Interesting
g19948	sp|Q8C525|M21D2_MOUSE	-0.231512	-1.13134	Not Interesting
g19962	sp|Q7ZXH2|NSE2_XENLA	-0.684844	-0.200278	Not Interesting
g19975	sp|Q54RZ7|Y1199_DICDI	-1.18843	-1.24224	Not Interesting
g19977	sp|Q7TPD1|FBX11_MOUSE	0.579208	0.673951	Not Interesting
g19978	sp|Q5XI07|LPP_RAT	-0.618842	-0.288797	Not Interesting
g19984	sp|Q02225|SKI_XENLA	-1.41254	-1.22797	Not Interesting
g19992	sp|Q5SVZ6|ZMYM1_HUMAN	0.918657	1.88791	Not Interesting
g20003	sp|Q9Z1T4|CNKR2_RAT	0.991805	0.341014	Not Interesting
g20012	NA	3.77074	3.51957	Not Interesting
g20027	sp|Q5PQM2|KLC4_RAT	-1.15105	-1.55573	Not Interesting
g20035	NA	5.24399	2.65273	Not Interesting
g20037	NA	5.44955	4.90511	Not Interesting
g20038	NA	3.76751	2.97933	Not Interesting
g2004	sp|Q6NUX8|RHOAA_DANRE	1.0986	0.926651	Not Interesting
g20040	NA	1.39558	0.263388	Not Interesting
g20042	sp|Q66IY8|I2BLA_XENLA	0.424869	0.527051	Not Interesting
g20043	NA	5.31619	4.05265	Not Interesting
g20045	NA	3.08906	2.75705	Not Interesting
g20046	NA	2.51186	2.58604	Not Interesting
g20049	NA	-0.897394	-1.59676	Not Interesting
g20050	sp|O41033|DUT_PBCV1	-1.39939	-1.38736	Not Interesting
g20052	sp|Q6PAX2|ATD3B_XENLA	-0.446806	-0.321389	Not Interesting
g20062	sp|P18761|CAH6_MOUSE	1.14409	0.57436	Not Interesting
g20068	sp|Q9ERQ8|CAH7_MOUSE	1.29995	0.764728	Not Interesting
g20071	sp|Q10462|CAH5_CAEEL	1.63185	0.51457	Not Interesting
g20080	sp|P00491|PNPH_HUMAN	-0.65141	-0.141888	Not Interesting
g20083	sp|O57525|CP17A_RANDY	7.03567	7.33925	Not Interesting
g20084	sp|A4IFB6|CNO10_BOVIN	-0.382452	-0.0699378	Not Interesting
g2009	sp|P15454|KGUA_YEAST	-0.745112	-0.525248	Not Interesting
g20096	NA	1.762	1.11846	Not Interesting
g2010	sp|O94827|PKHG5_HUMAN	1.03814	1.06954	Not Interesting
g2011	sp|O94827|PKHG5_HUMAN	1.16687	1.22086	Not Interesting
g20115	NA	1.88234	1.50067	Not Interesting
g20118	NA	1.14725	1.63481	Not Interesting
g2012	NA	0.736889	0.255488	Not Interesting
g20123	sp|P37967|PNBA_BACSU	-0.498721	-0.510467	Not Interesting
g2021	sp|O17389|TYB_CAEEL	0.200876	0.692177	Not Interesting
g2028	NA	1.29788	1.08964	Not Interesting
g203	sp|P54145|AMT1_CAEEL	0.867611	0.3356	Not Interesting
g20329	sp|Q3ZCC3|TRAF6_BOVIN	1.92409	1.6795	Not Interesting
g20340	NA	-0.765604	-0.874556	Not Interesting
g20342	sp|Q5MJ86|G3P2_DANRE	-0.990792	-0.259327	Not Interesting
g20349	sp|P64922|Y2028_MYCBO	2.47502	1.61074	Not Interesting
g20351	sp|P72745|Y1101_SYNY3	2.91301	2.94586	Not Interesting
g20359	sp|Q95R48|OCTL_DROME	-0.763651	-0.710694	Not Interesting
g2038	sp|P35400|GRM7_RAT	-1.16017	-1.91086	Not Interesting
g20388	sp|Q9C8L4|ETHE1_ARATH	-0.482786	-0.282034	Not Interesting
g2040	NA	-0.255065	-0.683524	Not Interesting
g20413	NA	3.00475	1.89372	Not Interesting
g20429	NA	0.12227	-0.671172	Not Interesting
g20432	NA	2.63077	1.4934	Not Interesting
g20435	NA	2.68808	0.553952	Not Interesting
g20440	NA	1.47581	1.8618	Not Interesting
g20456	sp|Q8VI02|PP4R1_RAT	-0.644417	0.0577646	Not Interesting
g20460	sp|Q9CQT9|CT024_MOUSE	1.18772	0.0852825	Not Interesting
g20473	sp|Q923S9|RAB30_MOUSE	2.37809	2.17809	Not Interesting
g20476	sp|O88281|MEGF6_RAT	1.8152	0.631772	Not Interesting
g20488	sp|Q9WVK7|HCDH_RAT	0.738084	0.0329332	Not Interesting
g20497	sp|Q15393|SF3B3_HUMAN	-0.625645	-0.077321	Not Interesting
g20499	sp|Q95SX7|RTBS_DROME	1.39643	2.29657	Not Interesting
g20514	sp|Q8NBX0|SCPDL_HUMAN	-1.80626	-0.013678	Not Interesting
g20530	sp|Q8NFH3|NUP43_HUMAN	-0.548581	-0.525147	Not Interesting
g20535	sp|P0C597|DUPD1_CHICK	-1.12031	-0.648361	Not Interesting
g20537	sp|Q08790|BLC_VIBCH	2.70872	2.37357	Not Interesting
g20558	sp|Q5MPP0|FA2H_MOUSE	0.966602	0.633182	Not Interesting
g20566	sp|Q6P6X9|NUP53_DANRE	-0.479827	0.00262377	Not Interesting
g20588	sp|O02466|ILPR_BRALA	0.853056	0.470881	Not Interesting
g20598	sp|Q9DBN1|STR6L_MOUSE	-0.438317	-1.32818	Not Interesting
g20600	sp|Q80TI0|GRM1B_MOUSE	0.729386	0.48217	Not Interesting
g20603	sp|Q99J45|NRBP_MOUSE	-0.780737	-0.399976	Not Interesting
g20611	sp|B3EWZ8|ECT_ACRMI	6.86362	5.63415	Not Interesting
g20625	sp|P20911|CDK7_XENLA	0.648885	0.39861	Not Interesting
g20637	sp|A2VDZ3|MEF2A_BOVIN	-0.635821	-0.719442	Not Interesting
g20645	sp|O00623|PEX12_HUMAN	1.33758	0.453785	Not Interesting
g20648	sp|Q5ZJX1|AB17C_CHICK	-0.601205	-0.282584	Not Interesting
g20654	sp|B3EWZ8|ECT_ACRMI	-1.11066	-0.494324	Not Interesting
g20655	sp|P46935|NEDD4_MOUSE	0.349696	0.29753	Not Interesting
g20674	sp|P22770|ACHA7_CHICK	-0.813837	-0.390915	Not Interesting
g2068	NA	1.24669	0.872361	Not Interesting
g20686	NA	-1.76752	-1.53101	Not Interesting
g20690	sp|Q6TXF1|ARRD3_RAT	1.22668	1.20242	Not Interesting
g20719	sp|Q6PAM0|AAKB2_MOUSE	1.37554	0.188808	Not Interesting
g20720	sp|Q99K48|NONO_MOUSE	-0.498662	-0.493506	Not Interesting
g20736	sp|P28175|LFC_TACTR	1.81814	2.49274	Not Interesting
g2076	sp|Q13451|FKBP5_HUMAN	-0.649994	-0.975456	Not Interesting
g20769	sp|P78412|IRX6_HUMAN	-0.278706	-0.541423	Not Interesting
g20774	sp|Q55874|Y103_SYNY3	1.90425	1.63652	Not Interesting
g20775	sp|Q9WU79|PROD_MOUSE	0.613651	0.646307	Not Interesting
g20783	NA	1.07764	0.961559	Not Interesting
g20786	NA	1.57904	0.596545	Not Interesting
g20790	NA	1.13734	0.861158	Not Interesting
g20792	sp|Q8IVN8|SBSPO_HUMAN	3.21714	2.22535	Not Interesting
g20794	sp|P83858|QRFPR_RAT	-0.974349	-1.14113	Not Interesting
g20796	sp|Q9FIC3|BOLA2_ARATH	1.0062	-0.195556	Not Interesting
g20802	sp|O61463|RLA2_CRYST	-0.779134	-0.476785	Not Interesting
g20803	NA	0.404139	0.554135	Not Interesting
g20816	sp|Q2VLG6|C163A_CANLF	4.3311	4.32203	Not Interesting
g20826	sp|Q2VLG6|C163A_CANLF	3.53352	3.45783	Not Interesting
g20835	NA	0.667149	0.581167	Not Interesting
g20838	NA	1.85789	0.325509	Not Interesting
g20858	sp|Q6NTR1|MET13_XENLA	0.812274	-0.231357	Not Interesting
g2086	NA	-0.453696	-0.212926	Not Interesting
g20867	sp|Q96RW7|HMCN1_HUMAN	-0.554908	-0.270572	Not Interesting
g20874	sp|G3MWR8|MICA3_BOVIN	0.677496	0.647368	Not Interesting
g20878	sp|O94851|MICA2_HUMAN	0.961223	0.733914	Not Interesting
g20880	NA	3.04562	2.4246	Not Interesting
g20881	sp|Q7RTP6|MICA3_HUMAN	1.3885	0.960068	Not Interesting
g20911	sp|P23770|GATA2_XENLA	-1.78236	-1.7998	Not Interesting
g20912	sp|Q5UCA8|BRYP_PHYPA	0.33773	-0.64164	Not Interesting
g20916	sp|Q02650|PAX5_MOUSE	-1.16723	-0.362195	Not Interesting
g20918	sp|P35360|OPSL_LIMPO	1.04179	0.11869	Not Interesting
g20922	sp|Q32NR4|TTC29_XENLA	0.93272	0.518352	Not Interesting
g20944	sp|Q8N2S1|LTBP4_HUMAN	-0.873371	-0.104088	Not Interesting
g20945	NA	1.54514	0.0174493	Not Interesting
g20949	sp|Q9UN19|DAPP1_HUMAN	0.808504	0.977586	Not Interesting
g2095	sp|Q9UKB1|FBW1B_HUMAN	0.507302	0.363235	Not Interesting
g20950	sp|Q9QXT1|DAPP1_MOUSE	0.744996	0.628917	Not Interesting
g20952	sp|Q9UN19|DAPP1_HUMAN	-1.00443	0.258698	Not Interesting
g20961	sp|D4A7V9|E2AK4_RAT	0.886848	0.782823	Not Interesting
g20989	sp|P27012|SCRY4_ENTDO	-0.919257	-0.268523	Not Interesting
g20991	sp|P46088|GST_NOTSL	-1.49999	-1.8442	Not Interesting
g20995	sp|P46088|GST_NOTSL	-2.50072	-3.1408	Not Interesting
g21001	sp|Q6A070|CREC1_MOUSE	-1.23391	-0.338721	Not Interesting
g21016	sp|Q05438|BMR1B_CHICK	-0.532427	-0.878719	Not Interesting
g21017	sp|A2ASS6|TITIN_MOUSE	-1.95948	-1.39797	Not Interesting
g21033	sp|Q6ZS17|FA65A_HUMAN	-0.445001	-0.558758	Not Interesting
g21056	sp|Q29RV1|PDIA4_BOVIN	0.530173	0.389966	Not Interesting
g21065	sp|Q5R9A4|DNJB9_PONAB	1.16846	0.622759	Not Interesting
g21067	NA	1.15856	0.613392	Not Interesting
g21079	sp|Q6DDT5|GSTCD_XENLA	0.838979	0.531437	Not Interesting
g2108	sp|Q6PEI7|PYRG1_DANRE	-0.320124	-0.400485	Not Interesting
g21085	sp|P37235|HPCL1_HUMAN	-0.0233466	-0.68328	Not Interesting
g2109	sp|A3KG59|P20D2_MOUSE	-0.629537	-0.738248	Not Interesting
g2111	sp|Q80VL3|PRIC3_MOUSE	-0.822169	-0.744729	Not Interesting
g21117	sp|O60262|GBG7_HUMAN	1.42078	-0.48418	Not Interesting
g21120	sp|Q99MI1|RB6I2_MOUSE	1.12849	0.916819	Not Interesting
g21131	NA	-0.758089	-0.214102	Not Interesting
g21137	sp|Q6QI06|RICTR_MOUSE	-2.56624	1.06387	Not Interesting
g21153	sp|Q6ZMW2|ZN782_HUMAN	-0.859878	-0.279184	Not Interesting
g21158	NA	0.0112793	-0.980153	Not Interesting
g21163	NA	-1.27636	-1.69687	Not Interesting
g21174	sp|P43368|CAN3_PIG	1.325	1.1742	Not Interesting
g21198	NA	2.05863	1.20047	Not Interesting
g21205	sp|Q6ZMB5|T184A_HUMAN	-0.784402	-1.32898	Not Interesting
g21219	sp|Q90623|MYPT1_CHICK	3.24213	1.95546	Not Interesting
g21233	sp|Q9NPA2|MMP25_HUMAN	7.51184	6.81432	Not Interesting
g21238	sp|Q9P2K1|C2D2A_HUMAN	-0.486321	-0.533425	Not Interesting
g21243	sp|Q5ZIE8|MCAF1_CHICK	0.474344	0.227821	Not Interesting
g21268	NA	2.34956	0.988801	Not Interesting
g21270	sp|Q0V7M1|KPSH1_BOVIN	-1.17017	-0.916067	Not Interesting
g21272	NA	1.7441	-0.0161759	Not Interesting
g21274	sp|Q8BG95|MYPT2_MOUSE	1.0755	0.895167	Not Interesting
g21293	NA	3.12885	3.00454	Not Interesting
g213	NA	-0.474352	-0.637829	Not Interesting
g21311	sp|Q9U539|OCT1_CAEEL	1.67334	-0.484701	Not Interesting
g21318	NA	-0.724091	-0.155289	Not Interesting
g21346	sp|Q63041|A1M_RAT	0.83013	0.548073	Not Interesting
g21347	sp|Q61838|PZP_MOUSE	1.13609	1.49194	Not Interesting
g21354	sp|Q5R4N8|A2MG_PONAB	0.875676	1.10944	Not Interesting
g21358	sp|P21329|RTJK_DROFU	1.06218	0.572473	Not Interesting
g21373	NA	1.9874	1.44571	Not Interesting
g2140	sp|A4II20|EGR1_XENTR	-0.482114	-0.20248	Not Interesting
g21407	sp|A6QPT7|ERAP2_BOVIN	-1.38969	-0.0998363	Not Interesting
g21434	sp|Q08509|EPS8_MOUSE	-0.256077	-0.426853	Not Interesting
g21448	sp|Q3EAQ5|PTR36_ARATH	1.38601	0.984009	Not Interesting
g21488	sp|O57422|OPN4B_XENLA	-0.30965	-1.02993	Not Interesting
g21520	NA	1.271	0.590463	Not Interesting
g21550	sp|P0DJ25|RL40_TETTS	-0.316909	-0.509615	Not Interesting
g21558	sp|Q6P6B7|ANR16_HUMAN	-0.979295	-1.68201	Not Interesting
g21574	sp|Q9J517|V218_FOWPN	-1.09051	-0.745159	Not Interesting
g21579	sp|Q8NET8|TRPV3_HUMAN	-0.542189	-0.584469	Not Interesting
g21581	sp|Q99728|BARD1_HUMAN	0.506332	0.629582	Not Interesting
g21583	NA	0.910397	0.639251	Not Interesting
g21639	NA	1.19191	0.705856	Not Interesting
g21647	NA	1.03331	2.1537	Not Interesting
g21670	sp|Q5R7S6|ZFAN6_PONAB	0.560617	0.329972	Not Interesting
g21684	sp|Q8VE62|PAIP1_MOUSE	0.879889	0.0588147	Not Interesting
g217	sp|Q94900|GLUCL_DROME	0.579289	0.093835	Not Interesting
g21702	sp|Q8CIW6|S26A6_MOUSE	2.68363	2.24699	Not Interesting
g21703	NA	-1.14332	-1.07929	Not Interesting
g21710	sp|Q1JPX3|SYFA_DANRE	-1.06062	0.175522	Not Interesting
g21711	NA	-0.771178	-0.523904	Not Interesting
g21713	sp|Q8CIW6|S26A6_MOUSE	2.09043	2.27999	Not Interesting
g21729	NA	-0.245092	-0.865313	Not Interesting
g21752	sp|Q02253|MMSA_RAT	-0.546938	-0.234648	Not Interesting
g21772	NA	0.474925	1.8919	Not Interesting
g21775	sp|P08183|MDR1_HUMAN	0.326741	0.359528	Not Interesting
g21784	NA	1.83937	-0.512993	Not Interesting
g21798	sp|Q8BGF8|S35D3_MOUSE	1.67772	1.1995	Not Interesting
g21806	sp|Q66HE7|CDKL1_RAT	-0.424303	-0.916786	Not Interesting
g21815	sp|Q5T2S8|ARMC4_HUMAN	-0.999198	-0.00158915	Not Interesting
g21830	NA	-2.36041	0.590996	Not Interesting
g21839	NA	-2.01701	-2.74775	Not Interesting
g2189	NA	-0.501281	-1.07847	Not Interesting
g21894	NA	1.1937	0.764754	Not Interesting
g21906	NA	0.96187	0.0425819	Not Interesting
g21914	NA	0.625622	0.622633	Not Interesting
g2192	sp|Q8TE12|LMX1A_HUMAN	-1.50106	-1.24915	Not Interesting
g2195	sp|P61212|ARL1_RAT	0.769964	-0.0215216	Not Interesting
g21971	NA	-0.851979	-0.209909	Not Interesting
g21976	sp|O95057|DIRA1_HUMAN	1.47936	1.40062	Not Interesting
g21983	sp|Q5XI73|GDIR1_RAT	0.73226	-0.092938	Not Interesting
g22016	sp|Q9UQC2|GAB2_HUMAN	-0.00689487	-0.60793	Not Interesting
g22017	sp|Q12704|DPOG_SCHPO	-0.672349	0.0330434	Not Interesting
g22028	NA	1.17535	0.93505	Not Interesting
g22056	sp|P79896|ADHX_SPAAU	-0.483094	-0.260438	Not Interesting
g22080	sp|A4II98|TM41B_XENTR	0.855684	0.0592033	Not Interesting
g22086	sp|Q5XGS8|GTPB1_XENLA	1.10756	1.77135	Not Interesting
g22087	sp|Q5XGS8|GTPB1_XENLA	2.27623	1.89774	Not Interesting
g22088	sp|D2XV59|GTPB1_RAT	1.67685	1.85203	Not Interesting
g22100	sp|Q4KM30|DESI1_RAT	0.810001	0.588642	Not Interesting
g22102	sp|Q9UQB8|BAIP2_HUMAN	-0.497648	-0.192408	Not Interesting
g22112	sp|Q91Z92|B3GT6_MOUSE	2.07367	1.57678	Not Interesting
g22114	NA	3.57958	3.60183	Not Interesting
g22119	sp|Q5QQ57|XYLT1_PANTR	1.00474	0.641875	Not Interesting
g22120	NA	-0.0429993	0.594018	Not Interesting
g22122	sp|Q9BZE9|ASPC1_HUMAN	-0.392202	-0.316242	Not Interesting
g22128	NA	0.590653	0.793163	Not Interesting
g22132	NA	1.52092	1.13517	Not Interesting
g22137	sp|P50129|5HT2A_PIG	-1.54763	-2.10878	Not Interesting
g22147	sp|O55101|SNG2_MOUSE	-0.540797	-0.245401	Not Interesting
g22164	sp|Q12887|COX10_HUMAN	-0.606767	-0.359704	Not Interesting
g22174	NA	2.03834	-0.116732	Not Interesting
g22184	sp|Q6XUX0|DUSTY_CHICK	-0.721536	-0.45559	Not Interesting
g22186	sp|Q91175|ADA1A_ORYLA	-1.75972	-2.26689	Not Interesting
g22197	sp|P07805|DCOR_TRYBB	-2.38693	-2.61302	Not Interesting
g2220	sp|Q55DW9|GACZ_DICDI	-1.05824	-0.472596	Not Interesting
g22205	sp|P27119|DCOR_MUSPA	-1.2349	-0.521817	Not Interesting
g22209	NA	1.13223	0.768081	Not Interesting
g2222	sp|Q6DFV8|VWDE_MOUSE	-0.692726	-0.589291	Not Interesting
g22220	NA	-1.83666	-1.33736	Not Interesting
g2223	sp|Q91ZW8|C209D_MOUSE	-1.15183	-0.499105	Not Interesting
g22230	sp|Q99MK9|RASF1_MOUSE	0.939399	-0.204829	Not Interesting
g22235	sp|Q2KID6|PLRG1_BOVIN	-0.326701	-0.45558	Not Interesting
g22238	NA	0.93291	-0.32351	Not Interesting
g22245	sp|Q62559|IFT52_MOUSE	1.19013	0.694783	Not Interesting
g22246	sp|Q9Y366|IFT52_HUMAN	0.910296	1.30601	Not Interesting
g22256	sp|Q5ZLX4|ARHG3_CHICK	1.45397	0.843579	Not Interesting
g22258	sp|Q62165|DAG1_MOUSE	0.824301	0.495101	Not Interesting
g2226	sp|Q6DFV8|VWDE_MOUSE	-1.03695	-0.63105	Not Interesting
g22286	sp|B3VSC2|TSN9_SHEEP	0.876153	0.379132	Not Interesting
g22295	sp|Q91VM3|WIPI4_MOUSE	-0.646842	-0.837902	Not Interesting
g22300	sp|Q7SZ59|RASLC_DANRE	-0.761599	-0.729893	Not Interesting
g2231	NA	-1.24239	-0.980361	Not Interesting
g22313	NA	-0.423423	-0.699187	Not Interesting
g22317	sp|Q0VCJ7|RERG_BOVIN	3.26825	2.44441	Not Interesting
g22319	sp|Q7T163|KDIS_DANRE	-0.97247	-0.850883	Not Interesting
g22335	NA	1.43741	0.444397	Not Interesting
g22340	NA	1.26946	1.50538	Not Interesting
g22341	NA	2.38777	1.55644	Not Interesting
g22342	sp|Q6JHU7|P3H2_CHICK	-0.806138	-0.479255	Not Interesting
g2235	sp|Q8N2E2|VWDE_HUMAN	-0.931099	-0.0526634	Not Interesting
g22355	NA	1.80657	0.893222	Not Interesting
g22366	sp|O70511|ANK3_RAT	-1.66553	0.588114	Not Interesting
g224	NA	0.196836	-1.26538	Not Interesting
g22416	NA	0.819092	0.0581956	Not Interesting
g22435	sp|Q8BX57|PXK_MOUSE	-0.666461	-0.474596	Not Interesting
g22453	sp|Q0VBL1|TIGD2_MOUSE	1.0358	0.887794	Not Interesting
g22474	sp|P54756|EPHA5_HUMAN	1.08034	0.724727	Not Interesting
g22526	NA	3.11168	2.62993	Not Interesting
g22557	sp|Q61116|ZN235_MOUSE	0.648645	0.494199	Not Interesting
g22558	sp|P20107|ZRC1_YEAST	-0.0180995	-0.581374	Not Interesting
g22563	sp|Q9UBJ2|ABCD2_HUMAN	0.935543	0.468379	Not Interesting
g22575	sp|Q9HC24|LFG4_HUMAN	-0.00320199	1.05867	Not Interesting
g22585	sp|Q91Z46|DUS7_MOUSE	3.41833	2.61268	Not Interesting
g22595	sp|P21328|RTJK_DROME	2.04341	1.2073	Not Interesting
g22610	sp|Q9NZJ5|E2AK3_HUMAN	0.504714	0.443186	Not Interesting
g22612	sp|Q91827|AR1_XENLA	-0.748619	-1.06461	Not Interesting
g22614	sp|Q5DQR4|STB5L_MOUSE	-1.07152	-0.0552576	Not Interesting
g22615	sp|Q8HYJ7|FUT5_GORGO	1.94233	1.56672	Not Interesting
g22616	sp|Q5DQR4|STB5L_MOUSE	-0.490932	-0.241359	Not Interesting
g22633	sp|P34275|IVD_CAEEL	0.665424	-0.121558	Not Interesting
g22636	NA	1.52506	1.76479	Not Interesting
g22644	sp|Q810Q5|NMES1_MOUSE	-1.27245	-1.69414	Not Interesting
g22646	sp|P0CH95|PHF8_DANRE	-0.676345	-0.55341	Not Interesting
g22655	sp|Q63690|BAX_RAT	0.614087	0.26493	Not Interesting
g22659	NA	-0.68713	-0.163098	Not Interesting
g22677	sp|Q8IWV2|CNTN4_HUMAN	-0.748805	-0.483616	Not Interesting
g22718	sp|P11845|IPP2_RABIT	0.57685	0.0317591	Not Interesting
g22723	sp|Q6DFJ3|FUD1B_XENLA	0.881263	-0.119749	Not Interesting
g2273	NA	0.480108	0.0814807	Not Interesting
g22738	sp|Q5REK0|FMO2_PONAB	-1.1392	-1.27193	Not Interesting
g2274	NA	2.50092	2.07732	Not Interesting
g22764	NA	0.88714	0.425025	Not Interesting
g22780	sp|Q7SYH5|SC5A8_XENLA	-0.564182	-0.62568	Not Interesting
g22781	sp|Q8BYF6|SC5A8_MOUSE	-0.655147	-0.476334	Not Interesting
g22782	sp|Q7SYH5|SC5A8_XENLA	-5.30991	-1.93253	Not Interesting
g22784	sp|Q8BYF6|SC5A8_MOUSE	-1.03206	-0.564281	Not Interesting
g22790	NA	1.14664	1.24775	Not Interesting
g22804	sp|O17185|SUP9_CAEEL	-0.547428	-0.968496	Not Interesting
g22821	NA	-4.73939	-1.05108	Not Interesting
g22822	NA	-1.97132	-2.47245	Not Interesting
g22863	sp|Q5ZL00|EMC1_CHICK	0.576826	-0.105772	Not Interesting
g22869	NA	-1.1905	-1.67459	Not Interesting
g22870	sp|P07314|GGT1_RAT	0.904165	0.844608	Not Interesting
g2288	NA	-1.36627	-1.30498	Not Interesting
g22881	sp|P0CI65|NPHP3_DANRE	-0.290859	-1.03864	Not Interesting
g22928	NA	-1.01734	-1.28915	Not Interesting
g22933	sp|Q9NR82|KCNQ5_HUMAN	-0.440129	-0.713983	Not Interesting
g22934	NA	4.9357	4.811	Not Interesting
g22935	sp|Q9JK45|KCNQ5_MOUSE	-0.733879	-0.548783	Not Interesting
g22940	sp|Q9QUR2|DCTN4_RAT	-0.390683	-0.461403	Not Interesting
g22941	sp|Q68F35|S20AA_XENLA	-1.1243	-0.603354	Not Interesting
g22942	sp|Q28E01|S20A2_XENTR	-0.625147	-0.338235	Not Interesting
g22945	NA	2.9383	1.12125	Not Interesting
g2295	NA	-1.71331	-2.78434	Not Interesting
g22960	sp|P11466|OCTC_RAT	-0.800361	-0.617204	Not Interesting
g22970	NA	1.04995	0.521357	Not Interesting
g22978	sp|Q717B4|TDPZ3_MOUSE	-0.299397	-0.73782	Not Interesting
g22981	sp|Q9JI03|CO5A1_RAT	0.288043	-0.8241	Not Interesting
g22983	sp|Q86IC8|CAMT2_DICDI	-0.567922	-0.811879	Not Interesting
g22990	sp|Q32PV0|GULP1_DANRE	1.15253	1.15938	Not Interesting
g23	NA	1.78857	-0.0304442	Not Interesting
g23047	sp|P97819|PLPL9_MOUSE	-0.868736	-0.736935	Not Interesting
g23048	sp|P97570|PLPL9_RAT	0.790056	1.15208	Not Interesting
g23049	sp|Q9CYH6|RRS1_MOUSE	-0.584449	0.27555	Not Interesting
g23058	sp|Q4QQU1|BUD13_RAT	-0.70158	-0.471281	Not Interesting
g23065	sp|A4IFD0|KAD5_BOVIN	-0.757106	-0.79907	Not Interesting
g23067	sp|Q4R7W3|RGPS2_MACFA	-0.373953	-0.381977	Not Interesting
g23069	NA	-1.55788	-1.78163	Not Interesting
g23079	NA	3.78536	3.86927	Not Interesting
g23088	sp|A2AJ15|MA1B1_MOUSE	0.674506	0.473186	Not Interesting
g23091	sp|Q3MHN8|TRM5_BOVIN	0.996178	0.46442	Not Interesting
g23100	sp|Q03168|ASPP_AEDAE	-0.553615	-0.194423	Not Interesting
g23101	sp|Q96ME1|FXL18_HUMAN	-1.11414	-0.805231	Not Interesting
g23103	NA	-1.38108	-0.843766	Not Interesting
g23109	NA	1.34718	0.863858	Not Interesting
g23134	sp|Q52KK3|S2551_RAT	-1.07697	-1.16207	Not Interesting
g23137	sp|Q12955|ANK3_HUMAN	0.380156	0.692505	Not Interesting
g23151	NA	-0.500804	-0.254453	Not Interesting
g23188	sp|P31646|S6A13_RAT	-0.253745	-0.71755	Not Interesting
g23193	sp|P19246|NFH_MOUSE	0.235906	0.840447	Not Interesting
g23194	sp|Q06455|MTG8_HUMAN	-0.812659	-0.420735	Not Interesting
g23217	NA	0.86119	1.67699	Not Interesting
g2324	NA	-0.720343	-0.448937	Not Interesting
g23248	sp|Q80TC5|POGK_MOUSE	-0.155433	-2.98124	Not Interesting
g23253	sp|Q14457|BECN1_HUMAN	-0.557137	-0.0882941	Not Interesting
g2326	sp|Q4V8D9|LRC34_RAT	-1.41389	-0.779906	Not Interesting
g23279	NA	1.43943	0.353922	Not Interesting
g23284	sp|P54288|CACB2_RABIT	0.325674	0.576937	Not Interesting
g23296	sp|Q64317|DLX1_MOUSE	-0.969713	-0.815177	Not Interesting
g2330	sp|Q8K4L3|SVIL_MOUSE	-0.999858	-0.167899	Not Interesting
g23304	sp|Q8CHN8|MASP1_RAT	2.18326	2.38914	Not Interesting
g23310	sp|A1ZA47|ZASP_DROME	-0.284453	-0.53957	Not Interesting
g23311	sp|O75112|LDB3_HUMAN	-0.485164	-0.608141	Not Interesting
g23312	sp|Q9JKS4|LDB3_MOUSE	-0.506056	-0.384066	Not Interesting
g23343	sp|P11528|GCY_ARBPU	-1.48096	-1.46163	Not Interesting
g23344	sp|P16066|ANPRA_HUMAN	-1.18405	-1.21737	Not Interesting
g23373	NA	-1.10532	-1.45476	Not Interesting
g234	sp|P05933|CALM_SCHPO	6.09065	5.58653	Not Interesting
g23421	sp|Q82P90|IABF_STRAW	5.70835	6.18848	Not Interesting
g23426	NA	-2.24018	1.54908	Not Interesting
g23428	sp|Q68CJ9|CR3L3_HUMAN	1.14939	1.02789	Not Interesting
g23435	sp|Q86WA9|S2611_HUMAN	3.89951	4.0687	Not Interesting
g23437	sp|Q09662|YS51_CAEEL	-0.502036	-0.496642	Not Interesting
g23450	sp|Q9MYY0|HPSE_BOVIN	-0.865948	-1.26935	Not Interesting
g2346	sp|Q14AT5|ANO7_MOUSE	-0.342973	-0.439072	Not Interesting
g23492	sp|A6QPT6|ZN274_BOVIN	-0.346909	-0.533367	Not Interesting
g23499	sp|D9IQ16|GXN_ACRMI	-0.528013	-0.742913	Not Interesting
g23552	sp|Q9CD89|RNMT_MYCLE	1.55421	0.715631	Not Interesting
g23554	sp|Q8VBX6|MPDZ_MOUSE	0.507785	1.10854	Not Interesting
g23571	NA	1.18487	1.36105	Not Interesting
g23579	sp|O95721|SNP29_HUMAN	0.86688	0.870339	Not Interesting
g23580	sp|Q8CIV8|TBCE_MOUSE	0.950046	0.277189	Not Interesting
g23586	sp|Q9NXG0|CNTLN_HUMAN	0.868764	0.664357	Not Interesting
g23593	sp|D3ZTQ1|SFSWA_RAT	0.578315	0.684985	Not Interesting
g23595	sp|Q6GQ82|SNF5_XENLA	-0.745735	0.0584865	Not Interesting
g23596	sp|Q8VIP2|MLXPL_RAT	-2.74587	0.239019	Not Interesting
g23599	sp|Q99MZ3|MLXPL_MOUSE	-1.1583	-0.0413148	Not Interesting
g2360	sp|O76083|PDE9A_HUMAN	0.440592	0.376082	Not Interesting
g23617	NA	1.10533	0.17697	Not Interesting
g23620	sp|P61315|G3ST3_MOUSE	1.87411	1.22931	Not Interesting
g23621	sp|Q9BX70|BTBD2_HUMAN	1.0568	0.656991	Not Interesting
g23638	sp|Q9UIK4|DAPK2_HUMAN	-0.756253	-0.706353	Not Interesting
g23642	NA	-0.898343	-1.09118	Not Interesting
g23652	sp|Q2HJE4|UBP15_BOVIN	-0.671192	0.0941511	Not Interesting
g23657	sp|Q17QK8|SPRE_BOVIN	-0.396421	-0.882765	Not Interesting
g23692	sp|Q8VIJ8|NPRL3_MOUSE	0.296167	0.338918	Not Interesting
g23705	sp|Q16X15|MED24_AEDAE	0.089568	0.534016	Not Interesting
g23709	sp|Q5ZID0|NMRL1_CHICK	-0.328064	-0.546125	Not Interesting
g23720	sp|P79702|FOS_CYPCA	3.93963	4.09685	Not Interesting
g23729	sp|Q60584|FBXW2_MOUSE	-1.93861	-1.43218	Not Interesting
g23732	NA	-0.509661	-0.714365	Not Interesting
g23735	sp|Q08DK7|MCATL_BOVIN	-0.61894	-0.148787	Not Interesting
g23742	sp|G3V9H8|RET_RAT	0.723462	0.590701	Not Interesting
g23749	sp|D2IYS2|TORSO_BOMMO	-0.503995	-0.232688	Not Interesting
g23791	NA	1.7162	0.0987742	Not Interesting
g23825	sp|Q3T0Q2|TMM59_BOVIN	0.653155	-0.141451	Not Interesting
g2383	sp|Q3ZBV2|DD19A_BOVIN	-0.65026	0.0294492	Not Interesting
g23834	sp|Q640L2|SPX3_XENLA	-1.1139	-1.30856	Not Interesting
g23835	sp|Q17QZ3|SPX3_BOVIN	-1.78112	-2.85846	Not Interesting
g23837	sp|Q17QZ3|SPX3_BOVIN	-1.2562	-1.30094	Not Interesting
g23852	sp|Q8N6T3|ARFG1_HUMAN	0.19326	1.14588	Not Interesting
g23854	NA	1.34094	0.618784	Not Interesting
g23856	NA	2.24616	1.4801	Not Interesting
g23857	NA	2.40329	3.07718	Not Interesting
g23878	sp|Q7ZZC8|NEK9_XENLA	0.78901	0.540906	Not Interesting
g23884	sp|Q9HCM4|E41L5_HUMAN	0.97445	-0.274053	Not Interesting
g23901	sp|Q96WM9|LAC2_BOTFU	-0.889883	-1.39511	Not Interesting
g23907	NA	-1.36981	-2.02178	Not Interesting
g23912	sp|Q7RTN6|STRAA_HUMAN	0.623099	-0.173974	Not Interesting
g23916	NA	1.2087	-0.0650829	Not Interesting
g23930	sp|A2AAY5|SPD2B_MOUSE	0.362725	0.565687	Not Interesting
g23932	sp|Q2KHM9|MOONR_HUMAN	0.361211	0.707187	Not Interesting
g23945	sp|Q86SZ2|TPC6B_HUMAN	1.22483	0.269607	Not Interesting
g23946	sp|Q9QYI6|DNJB9_MOUSE	0.728529	0.471096	Not Interesting
g23957	sp|Q9NSI6|BRWD1_HUMAN	-0.732957	-0.427901	Not Interesting
g23973	sp|Q7Z494|NPHP3_HUMAN	1.55002	0.191984	Not Interesting
g240	sp|P25325|THTM_HUMAN	0.740374	0.233311	Not Interesting
g24024	sp|Q91X58|ZFN2B_MOUSE	6.38872	6.24241	Not Interesting
g24035	NA	2.97045	2.60934	Not Interesting
g24036	NA	4.02939	4.41992	Not Interesting
g24037	NA	2.432	2.15512	Not Interesting
g24046	sp|P30937|SSR4_RAT	-0.802502	-2.02221	Not Interesting
g24050	NA	3.44141	4.12078	Not Interesting
g24054	NA	0.915828	1.73718	Not Interesting
g24055	NA	0.993112	1.25804	Not Interesting
g24062	NA	2.02847	1.24374	Not Interesting
g24063	NA	1.02495	1.71855	Not Interesting
g24070	sp|P70567|TMOD1_RAT	-1.5606	-1.65734	Not Interesting
g241	sp|Q96P65|QRFPR_HUMAN	0.0314922	-0.880149	Not Interesting
g24114	sp|Q28FN6|OTX2_XENTR	-2.56877	-2.52926	Not Interesting
g24126	sp|O42097|FOXA2_ORYLA	-1.20203	-1.08131	Not Interesting
g24130	sp|Q80ZD3|S2611_MOUSE	0.709554	-0.011647	Not Interesting
g24134	NA	-3.04023	-2.62763	Not Interesting
g24137	NA	-0.15733	-1.2556	Not Interesting
g24140	sp|Q2KIV0|NOL12_BOVIN	0.712889	0.358481	Not Interesting
g24149	sp|Q6DFF6|KLH20_XENLA	-0.920462	-0.321589	Not Interesting
g24156	sp|P54646|AAPK2_HUMAN	-0.749622	0.236158	Not Interesting
g24168	sp|P21329|RTJK_DROFU	-0.753477	-0.404441	Not Interesting
g2417	sp|Q9LI84|CML16_ARATH	1.52727	1.00979	Not Interesting
g24171	NA	1.43417	0.156078	Not Interesting
g24173	NA	1.36412	0.14022	Not Interesting
g24175	sp|A8XCP3|SODC_CAEBR	0.632556	0.477904	Not Interesting
g24181	sp|P20107|ZRC1_YEAST	0.72398	0.0970311	Not Interesting
g2419	sp|Q14209|E2F2_HUMAN	0.566748	0.291398	Not Interesting
g24191	sp|Q28107|FA5_BOVIN	2.52931	2.06574	Not Interesting
g24228	sp|Q6DFF6|KLH20_XENLA	-0.559021	-0.915174	Not Interesting
g24237	sp|P00787|CATB_RAT	-0.652033	-0.149685	Not Interesting
g24238	sp|O35217|MINP1_RAT	0.640294	0.252606	Not Interesting
g24247	NA	-0.317976	-1.35756	Not Interesting
g24256	sp|Q9Y5N5|HEMK2_HUMAN	2.26011	1.34783	Not Interesting
g24257	NA	0.899932	1.36421	Not Interesting
g24258	sp|Q6NU95|RPAP3_XENLA	0.640321	0.0494559	Not Interesting
g24277	sp|P07584|ASTA_ASTAS	0.692313	0.215827	Not Interesting
g24290	sp|Q92750|TAF4B_HUMAN	-0.84813	-0.429588	Not Interesting
g24294	sp|Q9JHJ7|TEST_MOUSE	2.20215	1.56052	Not Interesting
g24297	sp|P21328|RTJK_DROME	-1.30614	-0.475259	Not Interesting
g24306	sp|Q68EF4|GRM4_MOUSE	-1.2003	-1.79441	Not Interesting
g24307	sp|Q68ED2|GRM7_MOUSE	-1.52548	-2.16036	Not Interesting
g24308	sp|Q68EF4|GRM4_MOUSE	-2.04421	-2.73893	Not Interesting
g2431	NA	1.75038	0.200324	Not Interesting
g24312	sp|P48442|CASR_RAT	-1.3825	-1.40121	Not Interesting
g24313	sp|Q9QYS2|GRM3_MOUSE	-2.38612	-2.53061	Not Interesting
g24323	NA	3.73695	2.86093	Not Interesting
g24332	NA	1.96804	1.03286	Not Interesting
g24333	sp|Q8IZ81|ELMD2_HUMAN	1.13119	0.0351377	Not Interesting
g24335	sp|Q99501|GA2L1_HUMAN	0.526567	0.768812	Not Interesting
g24349	NA	4.92511	2.31462	Not Interesting
g24356	NA	-0.941693	-1.13728	Not Interesting
g24374	sp|Q9ERZ3|ACM3_MOUSE	-0.707858	-1.11798	Not Interesting
g24377	sp|P82968|MCPI_MELCP	0.948428	1.66052	Not Interesting
g24378	sp|O00222|GRM8_HUMAN	1.8749	1.74349	Not Interesting
g2440	NA	-1.84399	-1.11768	Not Interesting
g24400	sp|Q80TN4|DJC16_MOUSE	0.374414	0.628298	Not Interesting
g24406	sp|P11362|FGFR1_HUMAN	-1.04445	-1.18778	Not Interesting
g24410	sp|Q626H5|PLX2_CAEBR	0.72514	0.298928	Not Interesting
g24439	NA	0.774129	3.26759	Not Interesting
g24451	NA	0.941732	-0.702155	Not Interesting
g24452	NA	0.565872	-0.816648	Not Interesting
g24481	sp|Q5ZKN3|PHTF2_CHICK	0.665965	0.270465	Not Interesting
g24482	sp|Q95KC9|PCYOX_MACFA	1.34944	0.864601	Not Interesting
g245	sp|A7MB28|NDRG3_BOVIN	0.534302	0.321929	Not Interesting
g24500	sp|Q6PC19|SSU72_DANRE	1.35177	1.1166	Not Interesting
g24506	sp|Q5R4Q3|SEC62_PONAB	0.602584	0.369828	Not Interesting
g24516	sp|Q7L622|G2E3_HUMAN	-0.256242	-0.461335	Not Interesting
g24521	sp|Q5RJY2|G2E3_MOUSE	-0.535786	-0.252901	Not Interesting
g24526	sp|Q8BH57|WDR48_MOUSE	-0.63334	-0.131606	Not Interesting
g24542	sp|Q95KH6|RGF1C_MACFA	-0.990596	-1.42532	Not Interesting
g24543	NA	0.616265	0.587204	Not Interesting
g24556	sp|P54644|KRAC_DICDI	-0.746243	-0.793127	Not Interesting
g24574	sp|P63100|CANB1_RAT	1.27006	-0.0940448	Not Interesting
g24580	NA	1.04402	1.32766	Not Interesting
g24582	NA	0.97393	0.422991	Not Interesting
g24586	sp|Q5R4F8|C42S2_PONAB	-1.40345	-0.179817	Not Interesting
g24605	sp|Q5F3L4|DEN6A_CHICK	0.583745	0.615711	Not Interesting
g24624	NA	0.807443	0.33748	Not Interesting
g24626	sp|P35033|TRY3_SALSA	-0.638596	-0.589044	Not Interesting
g24631	sp|Q6NRE4|GARE1_XENLA	-0.58921	-0.921622	Not Interesting
g24653	sp|F6S215|AP5B1_XENTR	0.794717	0.00982081	Not Interesting
g2466	NA	3.79765	3.13955	Not Interesting
g24660	sp|Q6INU7|FRRS1_XENLA	1.06251	0.311874	Not Interesting
g24662	sp|Q5R5C5|NOX4_PONAB	3.05711	2.65975	Not Interesting
g24664	sp|Q9HBY0|NOX3_HUMAN	1.97185	1.45441	Not Interesting
g24678	sp|Q04972|VIPA_SALTI	1.25324	1.42012	Not Interesting
g24679	sp|Q04973|VIPB_SALTI	1.09047	1.00238	Not Interesting
g24683	sp|Q7T2B9|MTPN_DANRE	-0.125462	0.91299	Not Interesting
g24685	sp|Q86L51|RAPB_DICDI	1.86385	1.06974	Not Interesting
g24688	NA	1.0815	0.35023	Not Interesting
g24692	sp|Q5IFJ8|PSMD5_MACFA	1.68546	0.0998561	Not Interesting
g24693	sp|O14733|MP2K7_HUMAN	-0.387896	-0.291912	Not Interesting
g24698	sp|Q9Z160|COG1_MOUSE	0.282206	0.542947	Not Interesting
g24699	sp|A7MB12|UTP15_BOVIN	-0.518472	-0.0862203	Not Interesting
g24700	NA	-0.442059	-0.806276	Not Interesting
g24713	sp|Q08BV2|TYW5_DANRE	2.09538	1.45589	Not Interesting
g24715	sp|Q76KP1|B4GN4_HUMAN	2.08367	1.95882	Not Interesting
g24721	sp|A0ZSK4|STXB_SYNVE	-1.33392	-0.339789	Not Interesting
g24754	NA	-1.56128	-0.307678	Not Interesting
g24766	sp|D3YXG0|HMCN1_MOUSE	1.88806	0.349539	Not Interesting
g24768	sp|D3YXG0|HMCN1_MOUSE	0.763958	0.497507	Not Interesting
g24776	NA	0.660759	0.00199944	Not Interesting
g24777	sp|Q7RTS6|OTOP2_HUMAN	-0.252232	-0.577274	Not Interesting
g24786	sp|Q4R4E1|PIGM_MACFA	1.80307	0.0703904	Not Interesting
g248	NA	-0.314573	-0.668112	Not Interesting
g24876	NA	1.61673	1.27081	Not Interesting
g24877	NA	0.994993	0.853546	Not Interesting
g24883	NA	4.16116	3.71007	Not Interesting
g24884	sp|P53454|DRD5L_TAKRU	1.18839	0.345392	Not Interesting
g24900	NA	2.17897	0.645609	Not Interesting
g24911	NA	0.306147	0.764065	Not Interesting
g24930	sp|Q5SPH9|RT10_DANRE	-0.255119	-0.506902	Not Interesting
g24936	sp|Q54HW1|PSD10_DICDI	-4.40115	-5.08171	Not Interesting
g24939	sp|Q7T3H2|INS1B_DANRE	-1.41828	-0.871483	Not Interesting
g24952	sp|O15178|BRAC_HUMAN	3.02368	2.06116	Not Interesting
g24961	sp|Q8AW42|S39AD_DANRE	1.09397	0.72815	Not Interesting
g24976	sp|Q91ZW1|TFAM_RAT	0.521052	-0.114597	Not Interesting
g2498	sp|Q08DX7|SPNS1_BOVIN	-0.0178443	-0.410595	Not Interesting
g24983	sp|O75132|ZBED4_HUMAN	-0.502311	-1.34833	Not Interesting
g24987	sp|Q8TE73|DYH5_HUMAN	-0.471781	-0.116014	Not Interesting
g24996	sp|Q9UBF9|MYOTI_HUMAN	-3.19405	-2.84768	Not Interesting
g24997	sp|Q5U2P1|CNNM2_RAT	0.528222	0.574731	Not Interesting
g25006	sp|Q5U2P1|CNNM2_RAT	1.04411	0.744625	Not Interesting
g25011	sp|Q6P4Q7|CNNM4_HUMAN	1.05411	0.429835	Not Interesting
g25017	sp|Q9P0J7|KCMF1_HUMAN	-0.615529	-0.20366	Not Interesting
g25021	sp|P97292|HRH2_MOUSE	-1.24492	-1.08373	Not Interesting
g25032	sp|Q08857|CD36_MOUSE	1.80015	0.420827	Not Interesting
g25033	sp|Q3T0C2|PGDH_BOVIN	1.18913	0.539835	Not Interesting
g25039	NA	1.03641	0.57849	Not Interesting
g25040	NA	1.47475	0.975679	Not Interesting
g25044	NA	3.04023	2.13936	Not Interesting
g25070	sp|Q96K31|CH076_HUMAN	1.11675	0.270506	Not Interesting
g25071	sp|Q7M3K2|PELET_DROME	1.05571	0.770151	Not Interesting
g25073	sp|B5XF11|KDM8_SALSA	0.466235	0.0279656	Not Interesting
g25089	sp|Q5RFI8|PGM2_PONAB	-0.881309	-0.149438	Not Interesting
g25099	sp|P52948|NUP98_HUMAN	-0.84615	-0.0592694	Not Interesting
g25105	sp|Q9JME2|CHSTB_MOUSE	1.01782	1.34332	Not Interesting
g25120	sp|Q9Z0Z7|KLF5_MOUSE	-0.935769	-1.42855	Not Interesting
g25125	sp|Q9SWW5|PCS1_WHEAT	-0.360643	-0.506062	Not Interesting
g25126	sp|A6MEY4|PA2B_BUNFA	0.990155	-0.234785	Not Interesting
g25130	sp|Q6DH02|RM24_DANRE	-0.479261	-0.0171792	Not Interesting
g25137	sp|Q28620|NPT2A_RABIT	1.75915	1.27747	Not Interesting
g25144	NA	-1.90346	0.0803504	Not Interesting
g25146	sp|P63074|IF4E_RAT	0.795985	-0.194996	Not Interesting
g25161	sp|P56719|OX2R_RAT	-0.760508	-1.67388	Not Interesting
g25162	NA	-0.634218	-0.435344	Not Interesting
g25163	sp|P22316|CAC1S_CYPCA	0.516561	0.607717	Not Interesting
g25167	sp|Q9JJ19|NHRF1_RAT	-0.599121	-0.204599	Not Interesting
g25174	NA	-0.921507	-0.708315	Not Interesting
g25176	sp|Q5RBA5|SQSTM_PONAB	3.35137	3.34723	Not Interesting
g25177	NA	4.40342	3.47502	Not Interesting
g25179	NA	-0.783122	-0.858938	Not Interesting
g25180	sp|Q2XQV4|ALDH2_PIG	-0.47398	-0.280014	Not Interesting
g25185	sp|Q96RW7|HMCN1_HUMAN	-0.803535	-0.432711	Not Interesting
g25195	sp|Q9FXA2|PABP8_ARATH	0.574413	0.0147849	Not Interesting
g25199	NA	-1.44617	-0.572991	Not Interesting
g25225	sp|Q68F70|INT4_XENLA	-0.186824	-0.436962	Not Interesting
g25227	sp|Q8BIH0|SP130_MOUSE	-0.583829	-0.190801	Not Interesting
g2523	sp|Q32L85|SMDC1_BOVIN	1.10964	-0.308375	Not Interesting
g25238	sp|Q08D62|MAEL_XENTR	1.04619	0.756116	Not Interesting
g25242	sp|Q86NP2|NELFA_DROME	-0.812673	-0.0124719	Not Interesting
g25259	sp|Q9VCA2|ORCT_DROME	-1.29234	-1.26643	Not Interesting
g25264	sp|P78325|ADAM8_HUMAN	-2.15754	-0.649541	Not Interesting
g25265	sp|Q8AWI5|VM3HA_GLOHA	-1.70515	-0.537818	Not Interesting
g25276	NA	-0.590339	-1.51588	Not Interesting
g25284	sp|Q3UZD5|PRDM6_MOUSE	-0.550344	-0.543389	Not Interesting
g25306	sp|Q9WU19|HAOX1_MOUSE	-0.621543	-0.0618972	Not Interesting
g25311	NA	1.16815	0.734654	Not Interesting
g25315	NA	3.29901	1.58693	Not Interesting
g25321	NA	1.96527	1.63948	Not Interesting
g2533	sp|Q95J75|MFTC_MACFA	0.874413	0.0452885	Not Interesting
g25335	sp|P21328|RTJK_DROME	0.899427	0.467748	Not Interesting
g25353	sp|O14974|MYPT1_HUMAN	-5.26849	-1.78523	Not Interesting
g25356	sp|P35555|FBN1_HUMAN	2.07501	2.16726	Not Interesting
g25359	sp|P52272|HNRPM_HUMAN	1.37801	2.78627	Not Interesting
g25362	sp|O88281|MEGF6_RAT	1.9591	1.49161	Not Interesting
g25364	sp|P41041|CALM_PNECA	1.18203	1.17594	Not Interesting
g25382	NA	-2.0248	0.483374	Not Interesting
g25394	sp|Q9FT51|AB27G_ARATH	0.641875	0.408023	Not Interesting
g25395	sp|Q9C6W5|AB14G_ARATH	0.918956	0.0381586	Not Interesting
g25416	sp|P24802|PLOD1_CHICK	0.524671	0.431007	Not Interesting
g25422	sp|Q5U367|PLOD3_RAT	1.17182	0.543293	Not Interesting
g25424	sp|Q01H83|SELK_XENTR	0.915733	-0.337337	Not Interesting
g25445	sp|Q3UP23|TMM26_MOUSE	-0.426833	-0.804263	Not Interesting
g2548	sp|P30946|HS90A_RABIT	-0.0488688	-0.556248	Not Interesting
g25480	NA	-0.861285	-0.94081	Not Interesting
g25482	sp|Q865C0|CAH6_CANLF	0.579415	0.145183	Not Interesting
g25489	sp|O43422|P52K_HUMAN	1.15126	0.149927	Not Interesting
g25502	sp|Q7ZYA0|LMBD2_XENLA	0.627019	0.194082	Not Interesting
g25503	sp|Q08E13|RNF10_BOVIN	0.323201	0.472004	Not Interesting
g25504	sp|Q5XI59|RNF10_RAT	0.886703	0.268258	Not Interesting
g25524	sp|Q66GQ5|RWA3_ARATH	-0.331204	-0.833936	Not Interesting
g25532	sp|O95980|RECK_HUMAN	-1.94768	-1.71253	Not Interesting
g25533	sp|Q9UHC6|CNTP2_HUMAN	0.380118	0.327116	Not Interesting
g25556	sp|A7E2S9|A30BL_HUMAN	1.05655	0.810566	Not Interesting
g25557	sp|Q9H1Y3|OPN3_HUMAN	3.84105	3.45079	Not Interesting
g25564	NA	1.49689	0.955758	Not Interesting
g25566	sp|Q5U4Z8|RM20_XENLA	0.0487149	0.864565	Not Interesting
g25590	NA	1.96126	1.875	Not Interesting
g2561	sp|Q96RW7|HMCN1_HUMAN	1.21403	0.561449	Not Interesting
g25647	sp|Q62441|TLE4_MOUSE	-0.625763	-0.423933	Not Interesting
g25666	sp|O95490|AGRL2_HUMAN	1.94683	1.31644	Not Interesting
g25697	NA	0.975476	1.2395	Not Interesting
g25698	NA	2.83221	0.0907847	Not Interesting
g25709	sp|Q9UI42|CBPA4_HUMAN	0.51845	-0.0259892	Not Interesting
g25725	sp|Q5R9R1|EDRF1_PONAB	-0.422189	-0.75217	Not Interesting
g25736	sp|Q99JY3|GIMA4_MOUSE	-1.59726	-1.81655	Not Interesting
g25742	sp|E7F7X0|LMOD3_DANRE	-0.339587	-0.62042	Not Interesting
g25745	NA	0.860337	-0.452676	Not Interesting
g25748	NA	1.0017	0.54962	Not Interesting
g2575	sp|A1XQX0|NR1AA_DANRE	-0.840375	-1.57342	Not Interesting
g25763	NA	-0.699901	-0.0159777	Not Interesting
g25767	sp|P85838|FRIH_TREBE	0.636286	0.31075	Not Interesting
g25768	sp|Q5R5F8|PANK4_PONAB	1.53867	1.93627	Not Interesting
g25824	NA	3.69916	3.51533	Not Interesting
g25838	NA	2.89875	1.60531	Not Interesting
g25843	sp|Q9NQW5|PRDM7_HUMAN	-1.16934	-0.47419	Not Interesting
g25851	sp|Q6PGP7|TTC37_HUMAN	-1.26221	-0.176837	Not Interesting
g25854	sp|Q9H1Y3|OPN3_HUMAN	-3.29201	-4.82423	Not Interesting
g25859	sp|Q9CR47|NSA2_MOUSE	-0.406675	-0.217196	Not Interesting
g25860	sp|Q5Q995|KTAP2_IXOSC	0.743476	-0.0350983	Not Interesting
g25870	NA	1.24465	1.6701	Not Interesting
g25873	sp|Q9UDY8|MALT1_HUMAN	-1.278	-0.346982	Not Interesting
g25879	sp|Q9ZDZ8|Y165_RICPR	0.699026	0.65234	Not Interesting
g25886	sp|Q17758|PEPT2_CAEEL	-1.26733	-0.0460653	Not Interesting
g25893	NA	3.71732	3.01167	Not Interesting
g25899	sp|Q9ZDZ8|Y165_RICPR	1.21314	1.0343	Not Interesting
g259	NA	-0.636098	-0.750969	Not Interesting
g25927	NA	-0.515933	-0.603901	Not Interesting
g25930	sp|Q7Z494|NPHP3_HUMAN	1.60112	-0.127351	Not Interesting
g25937	sp|D3Z5L6|S18B1_MOUSE	-0.527098	-0.328812	Not Interesting
g25945	NA	3.34946	4.12861	Not Interesting
g25969	sp|Q6AZT7|NPHP3_XENLA	-1.3351	-1.53918	Not Interesting
g26003	sp|G3V9H8|RET_RAT	2.10127	1.6141	Not Interesting
g26025	sp|Q8NET8|TRPV3_HUMAN	-1.17174	-1.386	Not Interesting
g26026	sp|Q4UMH6|Y381_RICFE	-1.60413	-0.728914	Not Interesting
g26031	NA	2.46705	2.85814	Not Interesting
g26038	sp|Q99MT8|MRGRH_MOUSE	-1.18058	-1.67914	Not Interesting
g26055	NA	-1.02685	-0.915613	Not Interesting
g26061	sp|P48740|MASP1_HUMAN	1.11601	1.74528	Not Interesting
g2608	sp|Q7SZ59|RASLC_DANRE	-0.529357	-0.443852	Not Interesting
g2609	sp|O93530|WRN_XENLA	-0.544582	-0.266187	Not Interesting
g26105	NA	0.997575	1.28088	Not Interesting
g26106	sp|Q5R9H4|A1CF_PONAB	-0.51759	-0.389703	Not Interesting
g26107	sp|Q9BQS2|SYT15_HUMAN	0.327293	1.06607	Not Interesting
g26111	NA	1.54552	1.03652	Not Interesting
g26119	sp|D2HWM5|RFWD3_AILME	-0.539673	-0.274375	Not Interesting
g26121	sp|Q8BWT1|THIM_MOUSE	-0.416626	-0.306476	Not Interesting
g26124	sp|Q5ZL42|BZW2_CHICK	-0.496217	0.14984	Not Interesting
g2616	sp|Q4UMH6|Y381_RICFE	-0.459903	-1.27565	Not Interesting
g2618	sp|Q8VED2|BL1S4_MOUSE	2.54266	0.821174	Not Interesting
g26213	sp|O75486|SUPT3_HUMAN	-0.875136	-0.591403	Not Interesting
g2622	NA	2.21639	1.23477	Not Interesting
g2623	NA	2.88674	3.07703	Not Interesting
g26232	sp|D3ZAT9|FAXC_RAT	3.1652	3.5124	Not Interesting
g2624	sp|Q5U2U7|MCES_RAT	-0.523279	-0.13293	Not Interesting
g26250	NA	3.11676	3.05804	Not Interesting
g26271	sp|F1RAX8|COQ6_DANRE	-0.744443	-0.698487	Not Interesting
g26289	sp|O70157|TOP3A_MOUSE	-1.33444	-0.290025	Not Interesting
g26338	NA	4.08422	1.96279	Not Interesting
g26345	NA	1.12374	0.294794	Not Interesting
g26348	sp|Q5N870|DCL3A_ORYSJ	-0.101945	-1.11149	Not Interesting
g26351	sp|Q01617|CPO_DROME	-0.96307	-0.833957	Not Interesting
g26375	sp|Q6NWZ9|CDO1_DANRE	2.10672	1.58716	Not Interesting
g26393	NA	-1.49971	0.426094	Not Interesting
g2640	sp|Q7Z494|NPHP3_HUMAN	-1.52002	-2.89522	Not Interesting
g26401	NA	1.658	2.13757	Not Interesting
g26407	sp|Q8TDM6|DLG5_HUMAN	1.4741	1.73154	Not Interesting
g26417	NA	1.40396	1.43793	Not Interesting
g26422	sp|Q8TDM6|DLG5_HUMAN	1.86417	1.88888	Not Interesting
g26424	sp|Q8TDM6|DLG5_HUMAN	1.57677	1.79004	Not Interesting
g26425	sp|Q8K3X3|GMDS_CRIGR	0.440613	0.877124	Not Interesting
g26446	sp|Q803I2|ERGI3_DANRE	-0.242076	-0.414074	Not Interesting
g26461	sp|Q4R532|SYNG1_MACFA	-1.84855	-1.21446	Not Interesting
g26471	NA	-1.3396	2.18602	Not Interesting
g26489	sp|P21328|RTJK_DROME	3.92205	2.89673	Not Interesting
g26492	sp|Q5B995|NHP6_EMENI	1.14288	0.102566	Not Interesting
g26496	sp|Q6DDY9|RT07_XENLA	1.3854	-0.11952	Not Interesting
g26526	sp|O42387|RS24_TAKRU	-1.70196	-0.210367	Not Interesting
g26553	sp|Q7Z494|NPHP3_HUMAN	1.96197	0.553399	Not Interesting
g26554	NA	-0.558606	-1.33032	Not Interesting
g26557	sp|Q6P963|GLO2_DANRE	0.361206	0.668311	Not Interesting
g26558	sp|Q6P963|GLO2_DANRE	0.573092	0.338423	Not Interesting
g26562	NA	2.25039	5.65939	Not Interesting
g26569	sp|Q96UM2|LAC3_BOTFU	1.9533	1.45562	Not Interesting
g26570	sp|Q96WM9|LAC2_BOTFU	1.31442	1.47343	Not Interesting
g26572	sp|Q2QUN2|LAC24_ORYSJ	2.53894	1.88436	Not Interesting
g26573	sp|Q96WM9|LAC2_BOTFU	1.60558	2.14849	Not Interesting
g26583	sp|Q68CZ2|TENS3_HUMAN	1.25099	1.55502	Not Interesting
g26600	sp|B5X5D0|CI116_SALSA	1.57092	-0.0915499	Not Interesting
g26621	sp|Q9GT45|RS26_ANOGA	-1.31168	0.0488807	Not Interesting
g26623	sp|Q5BJB7|RM10_DANRE	-0.231024	-0.617376	Not Interesting
g26635	sp|Q4R8V8|CP100_MACFA	-1.27385	0.418077	Not Interesting
g26642	sp|Q61555|FBN2_MOUSE	-0.613704	-0.273712	Not Interesting
g2666	sp|P21677|TFE2_RAT	-0.63908	-0.448367	Not Interesting
g26683	sp|F4JCU0|SUA_ARATH	-0.733937	-0.375885	Not Interesting
g26703	NA	1.02653	0.622527	Not Interesting
g2673	NA	-1.60886	-0.737834	Not Interesting
g26750	sp|Q3SWX2|ACOT9_BOVIN	0.541047	0.300416	Not Interesting
g26764	NA	-1.02737	-1.18955	Not Interesting
g26776	sp|Q8BH86|CN159_MOUSE	-0.732559	-0.546451	Not Interesting
g26784	sp|C9D7R3|VMPA3_LOXIN	3.2427	3.29742	Not Interesting
g26786	sp|Q9NBX4|RTXE_DROME	1.67316	0.242488	Not Interesting
g26787	NA	0.615257	0.617734	Not Interesting
g26793	sp|Q03326|OXIR_STRAT	5.47544	5.39658	Not Interesting
g26795	sp|Q03326|OXIR_STRAT	-0.393526	-0.683275	Not Interesting
g26797	sp|Q03326|OXIR_STRAT	-0.726607	-0.849272	Not Interesting
g26798	sp|P35320|OXIR_STRLI	3.9214	3.05019	Not Interesting
g26799	sp|Q03326|OXIR_STRAT	2.5751	2.53637	Not Interesting
g268	sp|Q5REW1|IYD1_PONAB	0.11458	-0.559389	Not Interesting
g26809	NA	2.31112	1.58745	Not Interesting
g26815	sp|O95475|SIX6_HUMAN	-0.995771	-0.610377	Not Interesting
g26833	sp|P24014|SLIT_DROME	0.715008	0.29807	Not Interesting
g26848	NA	0.760682	0.261785	Not Interesting
g26858	sp|P42289|DRD1_XENLA	1.12708	1.16455	Not Interesting
g2686	sp|P35317|AT1A_HYDVU	0.404235	1.35007	Not Interesting
g26877	sp|Q9UBI9|HDC_HUMAN	-0.825707	-0.600608	Not Interesting
g2688	sp|P35317|AT1A_HYDVU	1.24587	1.18358	Not Interesting
g26881	sp|O14924|RGS12_HUMAN	2.06366	1.75714	Not Interesting
g26882	sp|Q2KHW7|RGS10_BOVIN	0.814494	0.955158	Not Interesting
g26886	sp|Q9R0X5|RPGR_MOUSE	0.567125	0.385444	Not Interesting
g26899	sp|Q5XHF8|VIP2_XENLA	-0.594505	-0.408946	Not Interesting
g26916	sp|Q09666|AHNK_HUMAN	-2.29384	0.0832948	Not Interesting
g26950	sp|Q9XZC0|LCTA_LATTR	0.476259	0.673946	Not Interesting
g26961	sp|P00976|IBPC_BOVIN	1.41362	1.28522	Not Interesting
g26988	sp|P16066|ANPRA_HUMAN	-0.5807	-0.101397	Not Interesting
g26989	NA	0.863606	0.405917	Not Interesting
g270	sp|P86925|RLGM2_TRYB2	2.59541	2.04107	Not Interesting
g27003	NA	1.60932	0.515785	Not Interesting
g27004	NA	2.48674	-0.13614	Not Interesting
g27008	sp|Q9WV54|ASAH1_MOUSE	0.563105	0.51018	Not Interesting
g27009	sp|A3KQV2|BROX_DANRE	0.742577	0.918321	Not Interesting
g27023	NA	-0.834264	-0.469434	Not Interesting
g2703	sp|Q7Z494|NPHP3_HUMAN	1.90995	0.677068	Not Interesting
g27032	NA	1.75542	1.05445	Not Interesting
g2704	NA	2.04918	0.733474	Not Interesting
g2705	sp|Q7Z494|NPHP3_HUMAN	2.94855	1.93233	Not Interesting
g27081	sp|Q8VHI4|CARTF_MOUSE	-0.6061	-0.235096	Not Interesting
g27084	sp|Q8WU66|TSEAR_HUMAN	1.00766	0.724543	Not Interesting
g27089	sp|Q8BPY9|FIGL1_MOUSE	-0.566553	-0.0178327	Not Interesting
g2711	sp|P21329|RTJK_DROFU	1.30587	1.12743	Not Interesting
g27115	sp|O62839|CATA_PIG	-1.00717	0.095387	Not Interesting
g27138	sp|O77775|NCF2_BOVIN	-1.93707	-2.4214	Not Interesting
g2717	sp|Q05438|BMR1B_CHICK	-0.693889	-0.780966	Not Interesting
g27170	sp|Q68EQ1|GMPPB_XENTR	1.01592	0.4286	Not Interesting
g27171	sp|Q7JZB4|GMPPB_DROME	0.780017	0.714925	Not Interesting
g27172	sp|Q6NTV8|MED20_XENLA	0.956581	0.345145	Not Interesting
g2719	sp|Q7Z494|NPHP3_HUMAN	1.89154	0.533388	Not Interesting
g27198	sp|Q5R631|RPF1_PONAB	0.505092	-0.0917809	Not Interesting
g2720	sp|Q9NSK0|KLC4_HUMAN	1.82366	1.212	Not Interesting
g27200	NA	2.66803	1.60284	Not Interesting
g27216	NA	2.34196	2.18156	Not Interesting
g27225	NA	-1.01129	-0.850109	Not Interesting
g27234	sp|Q99NB1|ACS2L_MOUSE	-0.92197	-0.169889	Not Interesting
g27267	sp|A7S6M8|LTOR4_NEMVE	1.0143	-0.139996	Not Interesting
g2729	NA	-0.822507	-0.656442	Not Interesting
g27294	sp|Q96JL9|ZN333_HUMAN	0.789952	0.552864	Not Interesting
g27296	NA	-0.094087	-0.673852	Not Interesting
g27301	sp|Q8BJW6|EIF2A_MOUSE	-0.47548	0.00287946	Not Interesting
g27312	NA	-0.406422	-1.525	Not Interesting
g27321	sp|Q86V85|GP180_HUMAN	1.37168	0.486823	Not Interesting
g27334	sp|Q04831|GLNA_PANAR	2.26809	1.97954	Not Interesting
g27340	sp|P61227|RAP2B_RAT	1.937	0.691267	Not Interesting
g27351	sp|Q86A72|Y4781_DICDI	-0.417958	-0.531881	Not Interesting
g27358	sp|Q9NR20|DYRK4_HUMAN	-0.472043	-0.174701	Not Interesting
g27365	sp|A7RDN6|RNLS_MOUSE	-0.875572	-0.636617	Not Interesting
g27366	sp|Q5ZLK1|DCA13_CHICK	-0.984788	0.0852518	Not Interesting
g27370	NA	-1.0941	-1.30047	Not Interesting
g27409	sp|Q6GNY1|MIB1_XENLA	-0.789029	-0.950923	Not Interesting
g27412	NA	2.04674	0.0270927	Not Interesting
g27414	sp|Q28C33|TBC30_XENTR	-0.55674	-0.609765	Not Interesting
g27416	NA	1.07099	0.101933	Not Interesting
g2743	sp|Q8IIG7|YPF05_PLAF7	2.90185	1.03507	Not Interesting
g27453	sp|A8WHP3|SC5A9_DANRE	-0.394956	-0.178886	Not Interesting
g27471	sp|Q9Z2I8|SUCB2_MOUSE	-0.842703	0.000297969	Not Interesting
g27479	sp|Q04073|P3A2_STRPU	0.57115	0.356613	Not Interesting
g27495	sp|Q09388|ACM2_CAEEL	-1.54823	-1.93066	Not Interesting
g27525	sp|Q9VZI3|UN112_DROME	-0.458653	0.0515187	Not Interesting
g27534	NA	2.25088	2.10417	Not Interesting
g27544	sp|Q9N1Q0|RSMB_MACEU	-0.747961	-0.141756	Not Interesting
g27552	sp|Q8NB59|SYT14_HUMAN	0.910537	0.727047	Not Interesting
g27562	sp|Q5S006|LRRK2_MOUSE	0.423227	0.622447	Not Interesting
g27577	sp|Q99569|PKP4_HUMAN	0.551862	0.543148	Not Interesting
g27583	sp|P35317|AT1A_HYDVU	0.5565	0.799254	Not Interesting
g27587	NA	-0.161858	-0.674366	Not Interesting
g27596	NA	-0.515122	-1.31469	Not Interesting
g27610	sp|Q9N1F2|FLVC1_FELCA	-1.64604	-1.45566	Not Interesting
g27611	sp|Q07230|ZSCA2_MOUSE	1.13462	1.38327	Not Interesting
g27612	sp|Q8WVB3|HEXDC_HUMAN	2.12733	2.14674	Not Interesting
g27641	sp|Q9D1F4|AKTS1_MOUSE	-0.790521	-1.00916	Not Interesting
g27642	sp|Q9D8B1|AIG1_MOUSE	0.987874	0.293282	Not Interesting
g27649	sp|O04714|GCR1_ARATH	-1.06893	-3.31666	Not Interesting
g27651	NA	-0.956095	-0.0247656	Not Interesting
g27666	sp|P02711|ACHA_TORMA	-0.620625	-0.621849	Not Interesting
g27708	sp|P51115|FXR1A_XENLA	-0.413276	-0.248031	Not Interesting
g27718	NA	1.61723	0.608928	Not Interesting
g27757	NA	4.11686	2.54605	Not Interesting
g27772	sp|Q24040|BGB_DROME	3.33613	3.67618	Not Interesting
g27777	sp|Q6NRE4|GARE1_XENLA	-0.68487	-0.913711	Not Interesting
g27784	sp|Q9BSE4|HERP2_HUMAN	0.832779	0.571974	Not Interesting
g27787	sp|P48508|GSH0_RAT	0.542975	0.639464	Not Interesting
g27790	sp|A5WFR0|PIF1_PSYWF	-1.29052	-1.54602	Not Interesting
g27801	sp|Q5UQ60|YL662_MIMIV	0.84385	0.682929	Not Interesting
g27825	sp|Q27415|NLP_DROME	-0.497443	-0.146583	Not Interesting
g27827	sp|Q5EA92|AL14E_BOVIN	4.60406	2.49789	Not Interesting
g2784	NA	0.66399	0.717832	Not Interesting
g27841	NA	-0.841929	0.282963	Not Interesting
g2785	NA	0.785959	0.547781	Not Interesting
g2786	NA	-0.786324	-0.458362	Not Interesting
g27863	sp|O62809|OX2R_PIG	3.31808	2.06671	Not Interesting
g27870	sp|Q96NB2|SFXN2_HUMAN	-0.761175	-0.292137	Not Interesting
g27874	NA	0.863759	1.24522	Not Interesting
g27891	sp|Q9QZH0|FZD4_RAT	-0.840196	-0.729685	Not Interesting
g27893	sp|Q7XJJ7|FAAH_ARATH	0.378976	0.499177	Not Interesting
g27896	sp|P12027|PSGP_ONCMY	-1.21983	-0.6191	Not Interesting
g2790	sp|O43422|P52K_HUMAN	7.36079	5.95358	Not Interesting
g2791	NA	0.103613	-0.885819	Not Interesting
g27925	sp|D2IYS2|TORSO_BOMMO	0.915419	0.314905	Not Interesting
g27943	sp|Q23983|SNAP_DROME	-2.03595	0.169027	Not Interesting
g27949	sp|Q6IVG4|ACAP2_RABIT	0.227146	0.478455	Not Interesting
g2795	NA	1.55455	1.15379	Not Interesting
g27950	sp|P42003|MAD_DROME	-0.27857	-0.526866	Not Interesting
g27953	sp|Q62432|SMAD2_MOUSE	-0.532424	-0.53866	Not Interesting
g27980	NA	-1.37814	0.475439	Not Interesting
g28000	sp|P16065|GCY_STRPU	-0.590632	0.0897618	Not Interesting
g28007	sp|B2RXA1|PLCX2_MOUSE	0.874063	1.03609	Not Interesting
g28009	sp|Q9VCE9|UBS3A_DROME	-1.01975	-0.730587	Not Interesting
g28034	NA	1.20386	0.349036	Not Interesting
g28042	sp|Q67FQ3|ARHB_XENLA	-2.33055	-2.34244	Not Interesting
g28058	NA	1.49799	0.365321	Not Interesting
g28059	sp|P42892|ECE1_HUMAN	-0.633404	-0.297766	Not Interesting
g28061	sp|P30823|CTR1_RAT	0.899411	0.0430745	Not Interesting
g28062	sp|O60103|DOA10_SCHPO	1.42095	0.845689	Not Interesting
g28064	sp|P17553|WNT3_MOUSE	3.3371	3.40064	Not Interesting
g28067	sp|Q6PB44|PTN23_MOUSE	0.709011	1.20161	Not Interesting
g28082	sp|Q8N584|TT39C_HUMAN	2.39851	2.00673	Not Interesting
g28086	sp|Q9FK68|RAA1C_ARATH	0.691229	0.448105	Not Interesting
g2810	NA	2.92494	2.78535	Not Interesting
g28101	sp|Q5FVY2|RSLBB_XENTR	-1.66824	-0.819986	Not Interesting
g28106	sp|O22719|LHTL3_ARATH	-0.728575	-0.65271	Not Interesting
g28118	NA	-0.705024	-1.10657	Not Interesting
g28134	sp|Q5EZ72|ENPP7_RAT	1.24852	0.530854	Not Interesting
g28136	sp|Q9NQW6|ANLN_HUMAN	0.321544	1.31896	Not Interesting
g28148	sp|P34139|RAB1A_DICDI	1.06255	0.236364	Not Interesting
g28152	sp|Q8BKF1|RPOM_MOUSE	-0.963498	-0.164363	Not Interesting
g28157	sp|P21328|RTJK_DROME	2.1868	1.03539	Not Interesting
g28161	sp|Q9I8I2|BOK_CHICK	-1.05563	-1.62335	Not Interesting
g28167	sp|Q96NN9|AIFM3_HUMAN	-0.53955	-0.463553	Not Interesting
g28179	sp|Q9V3J8|WDS_DROME	-0.626085	-0.121009	Not Interesting
g28187	sp|Q8C9B9|DIDO1_MOUSE	-1.15385	-0.119427	Not Interesting
g282	sp|Q9SZJ2|GRDP2_ARATH	-0.819475	-1.29013	Not Interesting
g28232	NA	2.17781	1.64638	Not Interesting
g28236	NA	-1.40812	-2.18746	Not Interesting
g28245	sp|Q6AY39|B3GL1_RAT	0.816974	0.0932006	Not Interesting
g28262	sp|P41221|WNT5A_HUMAN	0.789707	0.948684	Not Interesting
g28263	sp|O94762|RECQ5_HUMAN	0.803508	0.607071	Not Interesting
g28273	NA	5.77769	5.0916	Not Interesting
g28278	sp|B1H1W9|KTU_XENLA	-0.733001	-0.474498	Not Interesting
g28284	sp|A1L2I9|T214B_XENLA	0.397328	0.319108	Not Interesting
g2830	sp|P10090|WHITE_DROME	1.22014	1.07598	Not Interesting
g28301	sp|P22897|MRC1_HUMAN	-0.256793	-0.426886	Not Interesting
g28306	sp|Q9CQV4|F134C_MOUSE	0.582282	0.0262326	Not Interesting
g28308	NA	1.04123	1.29768	Not Interesting
g28309	sp|Q4V8E5|MFSD3_RAT	-0.722378	-0.527488	Not Interesting
g28311	sp|Q5DC69|CH10_SCHJA	1.21635	-0.408031	Not Interesting
g28321	NA	0.745764	0.11391	Not Interesting
g28327	NA	1.14893	0.260914	Not Interesting
g28333	sp|Q8BYR1|TYW4_MOUSE	1.02164	0.100582	Not Interesting
g28336	sp|P98073|ENTK_HUMAN	-0.457179	-0.60881	Not Interesting
g28361	sp|A5PK19|MET13_BOVIN	1.35253	0.113366	Not Interesting
g28368	sp|Q5ZL67|NF2L1_CHICK	1.1171	0.916953	Not Interesting
g2837	sp|P10090|WHITE_DROME	0.572628	0.372061	Not Interesting
g28374	NA	-0.920999	-1.3143	Not Interesting
g28379	NA	0.118989	-0.549045	Not Interesting
g28380	sp|Q9CX98|CP2U1_MOUSE	1.07228	0.0555447	Not Interesting
g28449	sp|P32028|FD4_DROME	-1.51773	-2.19915	Not Interesting
g28454	sp|P74615|Y1483_SYNY3	1.86678	1.32044	Not Interesting
g28460	sp|Q6VVW5|ANPRB_MOUSE	0.382825	0.483503	Not Interesting
g28466	sp|Q99LW6|YAF2_MOUSE	-0.411684	-0.488936	Not Interesting
g28481	sp|O60290|ZN862_HUMAN	2.52107	1.042	Not Interesting
g28492	sp|D3Z8N4|KLH20_RAT	-0.589201	-0.400716	Not Interesting
g28512	NA	-1.34891	-1.79725	Not Interesting
g28515	sp|Q26636|CATL_SARPE	-0.560356	-0.607658	Not Interesting
g28526	sp|Q60855|RIPK1_MOUSE	1.27194	0.367455	Not Interesting
g2855	NA	0.734735	-0.0759018	Not Interesting
g2856	NA	-0.733436	-1.60887	Not Interesting
g28597	sp|Q54LN4|GGHA_DICDI	-0.814123	-0.240445	Not Interesting
g28605	NA	-0.481495	-1.24443	Not Interesting
g28608	sp|Q7Z2H8|S36A1_HUMAN	1.44943	0.386611	Not Interesting
g28615	sp|Q0V8S0|HGS_BOVIN	0.521863	0.72032	Not Interesting
g28616	sp|Q80VP0|TCPR1_MOUSE	0.78549	0.844998	Not Interesting
g28668	sp|P17078|RL35_RAT	-1.52763	0.568273	Not Interesting
g28681	sp|A8WGS4|TLCD2_DANRE	-0.162647	-1.01735	Not Interesting
g2870	NA	-0.599532	-1.85061	Not Interesting
g28700	sp|Q9NXK6|MPRG_HUMAN	-1.96385	-2.38021	Not Interesting
g28706	sp|Q8VDL4|ADPGK_MOUSE	0.552698	0.379118	Not Interesting
g28716	NA	6.50004	6.31259	Not Interesting
g28717	NA	5.35387	4.79702	Not Interesting
g28764	NA	1.11145	0.244044	Not Interesting
g28767	sp|Q9ERQ8|CAH7_MOUSE	0.860594	0.447826	Not Interesting
g28768	sp|P43166|CAH7_HUMAN	0.744303	0.634931	Not Interesting
g28770	sp|P32020|NLTP_MOUSE	-2.04041	-0.0570183	Not Interesting
g28778	NA	-0.679818	-0.383869	Not Interesting
g28779	NA	1.35928	0.590682	Not Interesting
g28783	NA	4.70005	4.99816	Not Interesting
g28784	NA	5.09138	4.47496	Not Interesting
g28785	NA	5.86702	4.84449	Not Interesting
g28786	sp|P35285|RB22A_MOUSE	1.31265	0.82996	Not Interesting
g28791	NA	9.56831	7.50038	Not Interesting
g28799	sp|Q5ZJV7|FA60A_CHICK	-0.368796	-0.85982	Not Interesting
g28813	sp|Q92113|CP17A_SQUAC	-0.459593	-0.902451	Not Interesting
g28828	sp|Q8WXR4|MYO3B_HUMAN	3.0054	2.76085	Not Interesting
g28832	sp|P26261|SDC3_CHICK	0.474486	0.222018	Not Interesting
g28834	sp|A4IF30|S35F4_HUMAN	-0.0228384	-1.18267	Not Interesting
g28856	NA	-0.504571	-0.288466	Not Interesting
g28879	NA	0.909126	-0.024413	Not Interesting
g28880	sp|Q4UMH6|Y381_RICFE	0.458205	0.387226	Not Interesting
g2891	NA	-1.7522	-1.41493	Not Interesting
g28914	NA	1.26042	1.20975	Not Interesting
g28939	NA	1.40602	0.858787	Not Interesting
g28956	NA	1.87361	1.176	Not Interesting
g28967	NA	1.24525	0.431979	Not Interesting
g28980	sp|Q6MG82|PRRT1_RAT	-0.328979	-0.513954	Not Interesting
g28990	NA	-3.84246	1.75403	Not Interesting
g28992	sp|O76360|EGL4_CAEEL	0.785473	0.529619	Not Interesting
g29008	NA	1.29617	1.01911	Not Interesting
g29020	sp|Q6P112|RGL1_DANRE	-0.419685	-0.407461	Not Interesting
g2903	sp|Q6GMK0|MGT4B_DANRE	0.372834	0.159018	Not Interesting
g29033	sp|Q9Z129|RECQ1_MOUSE	-0.5345	-0.297389	Not Interesting
g29034	sp|Q5SX19|PIGL_MOUSE	2.08244	1.37162	Not Interesting
g29048	sp|Q9ERI6|RDH14_MOUSE	-0.406688	-0.522452	Not Interesting
g29061	NA	0.918351	0.929902	Not Interesting
g29071	sp|Q6DCX5|PCFT_XENLA	-0.81817	-1.04955	Not Interesting
g29105	sp|Q5U3U0|PHYD1_DANRE	-1.0767	-0.575049	Not Interesting
g29113	sp|A1DWM3|MFSD6_PIG	1.15167	0.312968	Not Interesting
g29132	sp|Q9Y6P5|SESN1_HUMAN	-0.541355	-0.294779	Not Interesting
g2914	sp|P11233|RALA_HUMAN	-0.318228	-0.345273	Not Interesting
g29144	sp|Q922B6|TRAF7_MOUSE	-0.675242	-0.085139	Not Interesting
g29149	sp|Q5RD78|HECD2_PONAB	0.46519	0.837451	Not Interesting
g2915	NA	-0.924199	-0.657508	Not Interesting
g29168	sp|Q6ZNB6|NFXL1_HUMAN	-0.784997	-0.410949	Not Interesting
g29177	sp|O94966|UBP19_HUMAN	-0.681375	-0.1927	Not Interesting
g292	NA	1.40488	0.946742	Not Interesting
g2920	sp|Q5F361|TBCK_CHICK	-0.723942	-0.330576	Not Interesting
g29203	sp|Q8IYT8|ULK2_HUMAN	1.31534	1.40604	Not Interesting
g29211	sp|P50904|RASA1_RAT	0.696793	0.691409	Not Interesting
g29234	sp|Q28E95|SH3R1_XENTR	0.711046	0.294008	Not Interesting
g29236	NA	1.37137	0.648761	Not Interesting
g29238	sp|A6QQR4|ERC6L_BOVIN	-1.28577	-0.0368359	Not Interesting
g29249	sp|P62597|POTE1_CHICK	-0.611373	-0.648381	Not Interesting
g29257	sp|Q8SQ72|SGCG_CANLF	0.687041	0.498623	Not Interesting
g29261	NA	0.175731	0.600853	Not Interesting
g29265	sp|Q9DGG6|ADCY9_CHICK	-0.514159	-0.613897	Not Interesting
g29266	sp|P51830|ADCY9_MOUSE	1.46554	1.01464	Not Interesting
g29268	NA	0.374811	0.842801	Not Interesting
g29272	sp|P16395|ACM1_DROME	-2.82136	-2.26223	Not Interesting
g29277	sp|Q60452|ERCC2_CRIGR	-0.440055	-0.319273	Not Interesting
g29284	sp|Q9NBX4|RTXE_DROME	1.03492	0.703961	Not Interesting
g29298	sp|Q9VZW5|FMAR_DROME	-0.333484	-0.520589	Not Interesting
g29308	sp|Q4L235|ACSF4_HUMAN	2.62601	3.07808	Not Interesting
g29309	sp|Q8TB61|S35B2_HUMAN	2.14628	2.08333	Not Interesting
g29325	sp|P56941|NPC1_PIG	0.697786	0.316683	Not Interesting
g29328	NA	5.0642	3.7979	Not Interesting
g29346	sp|O70585|DTNB_MOUSE	-0.549812	-0.329918	Not Interesting
g29358	sp|Q8BGD4|SO4C1_MOUSE	-0.591137	-0.514704	Not Interesting
g2936	NA	-0.549982	-0.770215	Not Interesting
g29373	sp|O60502|OGA_HUMAN	0.643019	0.141193	Not Interesting
g29382	sp|Q91WF7|FIG4_MOUSE	-0.694763	0.0909197	Not Interesting
g29387	sp|P18503|CAS4_EPHMU	1.53726	1.00784	Not Interesting
g29412	sp|P97739|ECE1_CAVPO	-1.19635	-1.50068	Not Interesting
g29415	sp|P11617|AA2AR_CANLF	0.932233	0.117906	Not Interesting
g29418	sp|P63255|CRIP1_RAT	1.83353	-0.218405	Not Interesting
g29420	sp|Q96RR1|PEO1_HUMAN	-0.723734	-1.0646	Not Interesting
g29425	sp|P21329|RTJK_DROFU	0.561372	0.082501	Not Interesting
g2943	sp|Q62908|CSRP2_RAT	-2.99842	-2.88724	Not Interesting
g29448	sp|Q24799|MYPH_ECHGR	1.68481	1.23966	Not Interesting
[truncated: 1,207 more rows]

## Sheet: Fig. 3H
Peak ID	Gene ID	Swissprot Annotation	Foot Reg logFC	Head Reg logFC	Structural Enrichment
10000	g18743	sp|Q5SZK8|FREM2_HUMAN	0.605969	0.734123	Not Interesting
100011	g12880	NA	-0.566025	-0.57886	Not Interesting
100016	g12880	NA	1.04544	0.793388	Not Interesting
100017	g12881	sp|Q96SK2|TM209_HUMAN	1.22349	1.01622	Not Interesting
10002	g18743	sp|Q5SZK8|FREM2_HUMAN	0.350755	0.774012	Not Interesting
100022	g12881	sp|Q96SK2|TM209_HUMAN	0.390324	1.06449	Not Interesting
100026	g12884	sp|P80513|MANF_BOVIN	1.98107	1.38587	Not Interesting
100028	g12885	sp|P08680|HEM0_MOUSE	-0.0917259	-0.587042	Not Interesting
100040	g12888	sp|Q8ST83|PHO_DROME	-0.42544	-0.483611	Not Interesting
100080	g11501	NA	0.854068	1.09795	Not Interesting
100081	g11502	sp|Q9QYP2|CELR2_RAT	1.33203	1.26373	Not Interesting
100098	g11503	sp|Q58A65|JIP4_MOUSE	0.468123	1.2367	Not Interesting
100143	g11519	sp|A2AVA0|SVEP1_MOUSE	0.914336	0.188955	Not Interesting
100145	g11519	sp|A2AVA0|SVEP1_MOUSE	0.894481	0.855805	Not Interesting
100167	g11530	NA	-0.362706	-1.06878	Not Interesting
100184	g11544	NA	-1.2881	-1.97269	Not Interesting
100201	g11545	sp|Q60813|ADM1A_MOUSE	-0.626198	-0.994865	Not Interesting
100202	g11545	sp|Q60813|ADM1A_MOUSE	-1.73981	-1.17037	Not Interesting
10022	g18745	sp|A8DYE2|TRPCG_DROME	-0.219281	-0.858282	Not Interesting
100224	g11547	NA	-0.574326	-0.88754	Not Interesting
100234	g11552	sp|Q9NBX4|RTXE_DROME	-0.51732	-0.949886	Not Interesting
10024	g18745	sp|A8DYE2|TRPCG_DROME	0.995144	1.37429	Not Interesting
10025	g18745	sp|A8DYE2|TRPCG_DROME	1.20762	1.57871	Not Interesting
100267	g11567	sp|P32780|TF2H1_HUMAN	1.1532	1.19676	Not Interesting
10027	g18745	sp|A8DYE2|TRPCG_DROME	1.22392	1.22832	Not Interesting
100275	g11568	sp|Q95SX7|RTBS_DROME	-0.127141	-0.913276	Not Interesting
100278	g11569	sp|Q2PZL6|FAT4_MOUSE	-0.433468	-0.54422	Not Interesting
100279	g11569	sp|Q2PZL6|FAT4_MOUSE	-0.656015	-0.95217	Not Interesting
10028	g18745	sp|A8DYE2|TRPCG_DROME	1.13432	1.37421	Not Interesting
100280	g11569	sp|Q2PZL6|FAT4_MOUSE	-0.700657	-0.82984	Not Interesting
100282	g11569	sp|Q2PZL6|FAT4_MOUSE	-1.03626	-0.761657	Not Interesting
100292	g11569	sp|Q2PZL6|FAT4_MOUSE	1.20598	1.06407	Not Interesting
10031	g18745	sp|A8DYE2|TRPCG_DROME	0.948756	1.56979	Not Interesting
100318	g11572	sp|Q60467|CO5A1_CRILO	0.750299	0.91093	Not Interesting
10032	g18745	sp|A8DYE2|TRPCG_DROME	1.29576	1.44274	Not Interesting
10034	g18745	sp|A8DYE2|TRPCG_DROME	1.30562	1.40633	Not Interesting
100343	g11575	sp|Q8BJ64|CHDH_MOUSE	-0.615565	-0.616137	Not Interesting
10036	g18745	sp|A8DYE2|TRPCG_DROME	1.06978	1.28437	Not Interesting
100373	g11588	NA	-0.736971	-1.3257	Not Interesting
100401	g11603	sp|Q6UPE0|CHDH_RAT	0.626169	1.1835	Not Interesting
100403	g11604	NA	-0.949254	-0.853247	Not Interesting
100405	g11604	NA	-0.473577	-0.872934	Not Interesting
100431	g11611	sp|C6KFA3|AGRG6_DANRE	-1.18991	-1.21146	Not Interesting
100449	g11614	NA	-0.861933	-0.927746	Not Interesting
100494	g15332	sp|P83852|CBPD_LOPSP	1.06542	0.816652	Not Interesting
10056	g18752	NA	0.235714	0.96976	Not Interesting
100571	g142	sp|Q9NXG6|P4HTM_HUMAN	-0.364732	-0.622007	Not Interesting
100572	g142	sp|Q9NXG6|P4HTM_HUMAN	-0.568382	-0.80294	Not Interesting
100581	g144	sp|Q562C7|PUM3_RAT	0.976231	1.08448	Not Interesting
1006	g22539	sp|Q9JLR1|S61A2_MOUSE	0.922785	0.624749	Not Interesting
100608	g9585	NA	0.944303	0.454755	Not Interesting
100628	g7227	NA	-0.923545	-0.265611	Not Interesting
100639	g7233	NA	0.661601	0.500522	Not Interesting
100681	g28783	NA	0.846433	0.921423	Not Interesting
100682	g28783	NA	1.00144	1.48411	Not Interesting
100689	g28784	NA	0.730037	0.994405	Not Interesting
100691	g28784	NA	0.831106	1.00044	Not Interesting
100693	g28784	NA	1.45688	1.99155	Not Interesting
100696	g28785	NA	0.52129	0.697324	Not Interesting
100697	g28785	NA	2.5838	3.37234	Not Interesting
100708	g28785	NA	1.73252	0.924016	Not Interesting
100710	g28786	sp|P35285|RB22A_MOUSE	0.841225	0.878794	Not Interesting
100719	g28791	NA	0.384771	0.838069	Not Interesting
100737	g28796	sp|Q3UUQ7|PGAP1_MOUSE	-1.17313	-1.38911	Not Interesting
100748	g28802	NA	0.930595	0.563964	Not Interesting
100770	g28817	NA	-0.518493	-0.810079	Not Interesting
100785	g28826	sp|Q8NEV4|MYO3A_HUMAN	1.26754	1.28042	Not Interesting
100790	g28828	sp|Q8WXR4|MYO3B_HUMAN	0.826237	0.486861	Not Interesting
100794	g28828	sp|Q8WXR4|MYO3B_HUMAN	0.904252	0.600993	Not Interesting
100795	g28828	sp|Q8WXR4|MYO3B_HUMAN	2.13787	1.28174	Not Interesting
100811	g28831	sp|Q2KJI2|STT3A_BOVIN	0.996792	1.0209	Not Interesting
100812	g28831	sp|Q2KJI2|STT3A_BOVIN	0.510958	1.05946	Not Interesting
100813	g28831	sp|Q2KJI2|STT3A_BOVIN	1.06548	0.538472	Not Interesting
100817	g28831	sp|Q2KJI2|STT3A_BOVIN	-0.544147	-0.742474	Not Interesting
100825	g28832	sp|P26261|SDC3_CHICK	1.72033	1.58095	Not Interesting
100858	g28844	NA	-0.261066	-0.998901	Not Interesting
100866	g28844	NA	-1.28676	-0.935831	Not Interesting
100875	g28845	NA	0.866488	1.24437	Not Interesting
100876	g28845	NA	1.01944	1.07526	Not Interesting
100880	g28845	NA	0.551262	0.99763	Not Interesting
100882	g28845	NA	1.22537	1.03887	Not Interesting
100883	g28845	NA	1.26219	1.01544	Not Interesting
100897	g28849	sp|Q2HJ86|TBA1D_BOVIN	-0.401283	-0.733391	Not Interesting
100940	g18522	sp|C3YZ51|UBA5_BRAFL	0.551981	1.27832	Not Interesting
101004	g18537	NA	-0.513303	-0.539595	Not Interesting
101005	g18537	NA	-0.761563	-0.726802	Not Interesting
101006	g18537	NA	-0.441994	-0.678487	Not Interesting
101026	g18539	sp|Q68SA9|ATS7_MOUSE	0.44506	0.726093	Not Interesting
101027	g18539	sp|Q68SA9|ATS7_MOUSE	1.47163	1.22141	Not Interesting
101046	g21163	NA	-0.272373	-0.826802	Not Interesting
101047	g21163	NA	-0.862796	-0.641546	Not Interesting
101048	g21163	NA	-0.680438	-0.768589	Not Interesting
101050	g21163	NA	-0.609227	-0.796158	Not Interesting
101052	g21163	NA	0.216275	1.04385	Not Interesting
101086	g21172	NA	-1.07252	-1.45696	Not Interesting
101145	g22464	sp|Q9PTJ6|CTDSL_CHICK	0.955023	0.845403	Not Interesting
101150	g22472	sp|P21328|RTJK_DROME	0.600522	1.19936	Not Interesting
101193	g22822	NA	-0.492845	-0.705674	Not Interesting
101206	g7849	NA	0.876704	0.864278	Not Interesting
101267	g22017	sp|Q12704|DPOG_SCHPO	-0.509991	-1.08188	Not Interesting
101283	g22028	NA	-1.20489	-1.56474	Not Interesting
101292	g22029	NA	-0.636714	-0.93497	Not Interesting
1013	g22541	sp|O88398|AVIL_MOUSE	-1.18347	-0.932159	Not Interesting
101305	g9301	NA	-0.969292	-1.31504	Not Interesting
101306	g9301	NA	0.687351	0.541519	Not Interesting
101325	g25667	NA	-0.4967	-0.546735	Not Interesting
101350	g25677	sp|Q9Z173|AGRL3_RAT	-0.455503	-0.567551	Not Interesting
101351	g25677	sp|Q9Z173|AGRL3_RAT	-0.76179	-0.431624	Not Interesting
101354	g25677	sp|Q9Z173|AGRL3_RAT	-0.548832	-1.05858	Not Interesting
101400	g25688	NA	0.556855	0.837143	Not Interesting
101403	g25688	NA	1.29568	0.777224	Not Interesting
101407	g25688	NA	-0.372235	-0.631536	Not Interesting
101408	g25688	NA	-0.516922	-0.865498	Not Interesting
101412	g25690	sp|C6FG12|NLRC5_ICTPU	-0.991216	-1.00513	Not Interesting
101428	NA	NA	-1.21283	-1.37408	Not Interesting
10145	g5754	NA	-0.733546	-1.09657	Not Interesting
101451	g14109	sp|Q80X19|COEA1_MOUSE	-0.917929	-1.7384	Not Interesting
101454	g14109	sp|Q80X19|COEA1_MOUSE	-0.741404	-0.590687	Not Interesting
101455	g14109	sp|Q80X19|COEA1_MOUSE	-0.699655	-1.05086	Not Interesting
101458	g14110	NA	-1.2169	-0.993093	Not Interesting
101464	g14110	NA	1.42855	2.04297	Not Interesting
101502	NA	NA	0.39389	0.711228	Not Interesting
101535	g3693	sp|Q5ZIV5|PDC10_CHICK	0.992139	0.734891	Not Interesting
10154	g5755	sp|Q08CX1|RASEF_XENTR	-0.683871	-0.737317	Not Interesting
101556	g3704	sp|P42577|FRIS_LYMST	0.697084	0.335182	Not Interesting
101566	g3709	NA	1.04208	0.935533	Not Interesting
101571	g3709	NA	0.462778	0.782547	Not Interesting
101572	g3709	NA	2.47553	2.61542	Not Interesting
101573	g3709	NA	1.45367	1.58218	Not Interesting
101578	g3710	sp|P38977|ANTA_HYDVU	-0.428391	-0.872381	Not Interesting
101580	g3710	sp|P38977|ANTA_HYDVU	1.07354	1.16122	Not Interesting
101581	g3710	sp|P38977|ANTA_HYDVU	2.47016	2.70301	Not Interesting
101583	g3710	sp|P38977|ANTA_HYDVU	1.07399	0.903889	Not Interesting
101584	g3710	sp|P38977|ANTA_HYDVU	0.967114	1.38229	Not Interesting
101585	g3710	sp|P38977|ANTA_HYDVU	2.48409	2.96113	Not Interesting
10160	g5758	NA	-0.566694	-0.762021	Not Interesting
101608	g3712	sp|P08045|XFIN_XENLA	-0.675856	-0.554597	Not Interesting
101610	g3712	sp|P08045|XFIN_XENLA	-0.535516	-0.884402	Not Interesting
101625	g3713	sp|Q8NDA2|HMCN2_HUMAN	-0.594001	-1.08693	Not Interesting
101635	g3713	sp|Q8NDA2|HMCN2_HUMAN	-0.271396	-1.00138	Not Interesting
101646	g3716	NA	-0.611025	-0.867068	Not Interesting
101647	g3716	NA	-1.07928	-1.31651	Not Interesting
101648	g3716	NA	-0.498963	-1.10083	Not Interesting
101662	g25223	sp|Q92685|ALG3_HUMAN	1.30283	1.02376	Not Interesting
101701	g25238	sp|Q08D62|MAEL_XENTR	0.786106	0.921115	Not Interesting
101726	g27583	sp|P35317|AT1A_HYDVU	1.07331	1.22592	Not Interesting
101739	g27585	sp|Q09930|DIRA_CAEEL	-0.207233	-0.999449	Not Interesting
101740	g27585	sp|Q09930|DIRA_CAEEL	-0.510645	-0.80933	Not Interesting
101746	g27586	NA	3.33345	3.01159	Not Interesting
101775	g27596	NA	-0.413146	-0.728639	Not Interesting
101778	g27596	NA	-0.71159	-0.938205	Not Interesting
101785	g27601	sp|Q5BL31|CF106_DANRE	-0.646865	-0.739197	Not Interesting
101811	g27611	sp|Q07230|ZSCA2_MOUSE	0.698623	0.794641	Not Interesting
101827	g27623	sp|O15027|SC16A_HUMAN	0.688605	0.6583	Not Interesting
101830	g27623	sp|O15027|SC16A_HUMAN	0.302995	1.06697	Not Interesting
101856	g27630	sp|Q7KQL8|THIO_PLAF7	1.46609	1.46832	Not Interesting
101906	g27649	sp|O04714|GCR1_ARATH	-0.630058	-1.52133	Not Interesting
10191	g1451	NA	-0.310702	-0.726162	Not Interesting
101921	g27652	NA	-1.23993	-1.26763	Not Interesting
101946	g27673	sp|Q7Z2Y8|GVIN1_HUMAN	0.394015	0.612266	Not Interesting
101961	g24137	NA	-0.569266	-0.600315	Not Interesting
101962	g24137	NA	-0.923584	-0.132455	Not Interesting
101976	g24138	sp|Q96P65|QRFPR_HUMAN	0.782837	0.285585	Not Interesting
101979	g24139	NA	-0.587449	-0.84847	Not Interesting
101985	g24140	sp|Q2KIV0|NOL12_BOVIN	-1.02561	-1.23036	Not Interesting
102020	g24148	sp|Q59J78|MIMIT_MOUSE	-0.668695	-0.715896	Not Interesting
102039	g24156	sp|P54646|AAPK2_HUMAN	0.451995	1.17149	Not Interesting
102068	g24168	sp|P21329|RTJK_DROFU	-0.403334	-0.650547	Not Interesting
102100	g1894	NA	0.994855	0.464546	Not Interesting
102149	g1928	sp|Q64512|PTN13_MOUSE	-1.2195	-1.53486	Not Interesting
102169	g1940	NA	-0.435007	-0.519093	Not Interesting
10222	g11336	NA	-0.871946	-0.470539	Not Interesting
10225	g11336	NA	-0.671506	-1.29673	Not Interesting
10226	g11337	NA	-0.363691	-0.768033	Not Interesting
102265	g13540	NA	-0.746015	-0.951217	Not Interesting
102268	g13542	sp|B8JLQ9|CBPO_DANRE	-0.305282	-0.645403	Not Interesting
10227	g11337	NA	-1.05575	-0.774358	Not Interesting
102278	g13544	sp|O08992|SDCB1_MOUSE	-0.736346	-0.487866	Not Interesting
102290	g13547	sp|Q174I2|PRIC1_AEDAE	0.739459	0.523943	Not Interesting
102314	g16486	NA	0.475467	0.900446	Not Interesting
102335	g16491	sp|P51984|CREB_HYDVD	0.228545	0.395384	Not Interesting
102338	g16491	sp|P51984|CREB_HYDVD	0.57095	1.24697	Not Interesting
102340	g16491	sp|P51984|CREB_HYDVD	0.820132	1.32283	Not Interesting
102350	NA	NA	-0.611155	-0.995615	Not Interesting
102377	g22766	sp|Q96DM1|PGBD4_HUMAN	-0.647479	-0.911484	Not Interesting
102398	g22767	NA	-0.704732	-1.06786	Not Interesting
1024	g22543	sp|P21328|RTJK_DROME	1.01689	0.790405	Not Interesting
102427	g11718	NA	-0.917953	-0.437948	Not Interesting
102430	g11718	NA	-0.730716	-1.00034	Not Interesting
102448	g11725	sp|P62997|TRA2B_RAT	-0.578122	-1.23925	Not Interesting
102487	g16561	sp|Q90828|DC1L1_CHICK	0.804463	0.819853	Not Interesting
102513	g16569	sp|Q9NRH2|SNRK_HUMAN	-0.64259	-0.680948	Not Interesting
10253	g4209	NA	1.00919	0.745535	Not Interesting
102530	g16576	NA	-1.39722	-1.16217	Not Interesting
102531	g16576	NA	-0.978705	-0.932126	Not Interesting
102561	g19102	sp|Q96MB7|HARB1_HUMAN	-1.09207	-1.33505	Not Interesting
102595	g10410	sp|Q4H4B6|SCRIB_DANRE	0.363942	1.05653	Not Interesting
102599	g10411	NA	-0.472569	-0.76905	Not Interesting
102610	g10420	sp|Q14160|SCRIB_HUMAN	-0.13241	-0.463008	Not Interesting
102620	g10425	NA	1.24952	1.66008	Not Interesting
102644	g5948	sp|Q9ESF4|LFG1_MOUSE	0.420581	0.973809	Not Interesting
102648	g5951	sp|Q969X1|LFG3_HUMAN	0.318514	0.992221	Not Interesting
102649	g5951	sp|Q969X1|LFG3_HUMAN	0.611761	1.13849	Not Interesting
102659	g810	sp|A0ZSK3|STXA_SYNVE	-1.08757	-1.11936	Not Interesting
102678	g1708	sp|C8YR32|LOXH1_MOUSE	-1.00474	-1.13664	Not Interesting
102679	g1708	sp|C8YR32|LOXH1_MOUSE	-1.3384	-1.9243	Not Interesting
102701	g1715	sp|Q9GZR5|ELOV4_HUMAN	0.550409	0.477042	Not Interesting
102702	g1715	sp|Q9GZR5|ELOV4_HUMAN	1.42723	1.46168	Not Interesting
102712	g1718	sp|P69478|CHSTB_RAT	1.67564	2.05282	Not Interesting
102715	g1718	sp|P69478|CHSTB_RAT	0.753578	1.32793	Not Interesting
102716	g1718	sp|P69478|CHSTB_RAT	-0.428029	-0.924798	Not Interesting
102736	g1723	NA	-0.593111	-0.754139	Not Interesting
102764	g23215	sp|Q96PX9|PKH4B_HUMAN	0.911851	0.76936	Not Interesting
102774	g23215	sp|Q96PX9|PKH4B_HUMAN	-0.820639	-1.13678	Not Interesting
102808	g23223	sp|Q7Z442|PK1L2_HUMAN	-1.18262	-1.15748	Not Interesting
102843	g23228	NA	-0.388772	-0.704624	Not Interesting
102862	g23230	sp|Q96MP5|ZSWM3_HUMAN	1.45966	1.3889	Not Interesting
102867	g23232	sp|Q6DCE8|CTR2_XENLA	0.911651	1.09983	Not Interesting
102908	g26554	NA	-0.940522	-0.644298	Not Interesting
102911	g26555	sp|Q4QY64|ATAD5_MOUSE	-0.670656	-0.877948	Not Interesting
102968	g22424	NA	-0.293609	-0.495442	Not Interesting
102980	g22424	NA	-1.04511	-0.89965	Not Interesting
102982	g22424	NA	-0.437917	-0.543748	Not Interesting
102990	g22425	NA	-0.475477	-0.501502	Not Interesting
102996	g22426	sp|Q5R5W0|LASP1_PONAB	-1.05086	-1.31377	Not Interesting
102999	g22426	sp|Q5R5W0|LASP1_PONAB	-0.641115	-0.773835	Not Interesting
103	g18880	sp|Q5RFB6|RPN1_PONAB	1.01901	0.899935	Not Interesting
1030	g22544	NA	-0.531222	-0.702378	Not Interesting
103018	g22435	sp|Q8BX57|PXK_MOUSE	-0.305894	-0.718771	Not Interesting
103032	g22437	sp|Q6GL44|OTUD5_XENTR	0.852257	0.897971	Not Interesting
103043	g22440	NA	-0.728468	-1.2214	Not Interesting
103055	g22443	NA	-1.22101	-1.37041	Not Interesting
103074	g22449	sp|Q80Y56|RBNS5_MOUSE	-0.206597	-0.620805	Not Interesting
103098	g22450	sp|P29375|KDM5A_HUMAN	-0.741979	-0.528105	Not Interesting
103100	g22450	sp|P29375|KDM5A_HUMAN	-0.462967	-0.703966	Not Interesting
103101	g22451	NA	-0.402314	-0.618149	Not Interesting
103108	g22451	NA	-0.796584	-1.02281	Not Interesting
103109	g22451	NA	-0.61776	-0.803695	Not Interesting
103112	g22452	sp|Q90WJ8|AJL2_ANGJA	-0.454203	-0.500772	Not Interesting
103127	g13376	sp|Q9GLY5|ITIH3_RABIT	0.913728	0.926269	Not Interesting
103134	g13379	sp|Q80Z30|PPM1E_RAT	0.575023	1.02038	Not Interesting
103170	g29204	NA	-0.599629	-0.254784	Not Interesting
10318	g4222	sp|Q60431|CASP3_MESAU	-0.432523	-0.641072	Not Interesting
103182	g29211	sp|P50904|RASA1_RAT	0.674154	0.796043	Not Interesting
103185	g29211	sp|P50904|RASA1_RAT	0.677034	1.21796	Not Interesting
103207	g21346	sp|Q63041|A1M_RAT	0.926493	1.02522	Not Interesting
103214	g21347	sp|Q61838|PZP_MOUSE	1.0896	1.05473	Not Interesting
103216	g21347	sp|Q61838|PZP_MOUSE	0.785964	1.36967	Not Interesting
103218	g21347	sp|Q61838|PZP_MOUSE	0.851819	1.24307	Not Interesting
103220	g21347	sp|Q61838|PZP_MOUSE	-0.371953	-0.458718	Not Interesting
103229	g21353	NA	0.810446	1.22436	Not Interesting
103232	g21354	sp|Q5R4N8|A2MG_PONAB	0.553629	1.38108	Not Interesting
103235	g21354	sp|Q5R4N8|A2MG_PONAB	0.662889	1.62871	Not Interesting
103239	g21354	sp|Q5R4N8|A2MG_PONAB	0.806156	0.644209	Not Interesting
103255	g21355	NA	-1.05079	-1.23075	Not Interesting
10326	g4225	NA	-0.411499	-0.715221	Not Interesting
103306	g13832	NA	1.1992	1.36778	Not Interesting
103334	g24582	NA	0.56739	0.745539	Not Interesting
103336	g24582	NA	0.959087	0.822275	Not Interesting
103343	g24582	NA	-0.526253	-0.840957	Not Interesting
103346	g24583	sp|P22413|ENPP1_HUMAN	-0.630752	-0.333952	Not Interesting
103354	g24583	sp|P22413|ENPP1_HUMAN	4.57186	4.45353	Not Interesting
103357	g24583	sp|P22413|ENPP1_HUMAN	-0.700425	-0.306018	Not Interesting
103381	g24589	sp|O15975|GNAQ_MIZYE	1.43337	1.61978	Not Interesting
103382	g24589	sp|O15975|GNAQ_MIZYE	2.04199	1.62757	Not Interesting
103383	g24589	sp|O15975|GNAQ_MIZYE	-0.479197	-0.905609	Not Interesting
103401	g24593	NA	-0.945992	-0.80303	Not Interesting
103402	g24593	NA	-0.746477	-0.402622	Not Interesting
103404	g24594	NA	-1.22873	-1.1993	Not Interesting
103406	g24594	NA	-0.739247	-0.862404	Not Interesting
103459	g23297	NA	-0.784469	-0.31543	Not Interesting
103470	g23298	NA	1.69705	0.727767	Not Interesting
103471	g23298	NA	2.0194	1.66852	Not Interesting
103472	g23298	NA	2.06967	1.11546	Not Interesting
103473	g23298	NA	1.79565	1.39245	Not Interesting
103476	g23298	NA	1.27673	0.883184	Not Interesting
103479	g23297	NA	2.25759	1.47043	Not Interesting
103481	g23297	NA	1.38052	0.746387	Not Interesting
103496	g23302	NA	-0.528646	-1.3698	Not Interesting
103539	g23309	sp|Q08BI9|MCU_DANRE	0.443092	1.01121	Not Interesting
103618	g23345	NA	-0.475996	-0.931204	Not Interesting
103619	g23345	NA	-0.490701	-0.689241	Not Interesting
103655	g11002	NA	-0.722916	-0.709907	Not Interesting
103704	g20989	sp|P27012|SCRY4_ENTDO	0.686719	0.312871	Not Interesting
103710	g20990	NA	-0.753436	-0.532489	Not Interesting
103723	g20993	sp|P27012|SCRY4_ENTDO	-0.193991	-0.805455	Not Interesting
103730	g20996	NA	-0.706012	-0.680798	Not Interesting
103731	g20996	NA	-0.724821	-1.12236	Not Interesting
103732	g20997	NA	-0.612464	-0.336666	Not Interesting
103744	g21004	sp|Q8VDL4|ADPGK_MOUSE	-1.14681	-0.625278	Not Interesting
103751	g21005	sp|Q9NBX4|RTXE_DROME	-1.28827	-1.10544	Not Interesting
103752	g21005	sp|Q9NBX4|RTXE_DROME	-0.442665	-0.598986	Not Interesting
103753	g21006	sp|Q9U518|ASPG_DIRIM	-0.444557	-0.383807	Not Interesting
10376	g4256	NA	1.0685	1.07029	Not Interesting
10377	g4256	NA	0.92228	0.928876	Not Interesting
10378	g4256	NA	1.81607	1.32192	Not Interesting
103824	g21018	NA	-0.40485	-0.457256	Not Interesting
10384	g4256	NA	0.321713	0.456149	Not Interesting
103842	g21027	sp|P97401|SFRP3_MOUSE	-0.55495	-0.680507	Not Interesting
103873	g21036	sp|A1L3T7|FA65C_MOUSE	-0.573124	-1.06523	Not Interesting
1039	g22545	NA	-1.00647	-1.37965	Not Interesting
103919	g18241	NA	-0.317444	-0.490668	Not Interesting
103929	g18244	sp|Q9Z2Y1|TIM_RAT	0.208105	0.394147	Not Interesting
103932	g18244	sp|Q9Z2Y1|TIM_RAT	0.843203	2.05876	Not Interesting
103934	g18245	sp|P53772|DLLH_BRAFL	-1.06776	-0.688489	Not Interesting
103935	g18245	sp|P53772|DLLH_BRAFL	-0.462082	-0.586209	Not Interesting
103938	g18245	sp|P53772|DLLH_BRAFL	0.188979	0.818476	Not Interesting
103946	g18250	sp|Q5ZJU3|ASNS_CHICK	-0.514704	-0.237424	Not Interesting
103949	g18251	sp|Q8SVT3|HD5_ENCCU	-1.20319	-0.919134	Not Interesting
103996	g19880	sp|P27545|CERS1_MOUSE	0.47512	0.41959	Not Interesting
103998	g19880	sp|P27545|CERS1_MOUSE	0.73227	0.51046	Not Interesting
104015	g19881	sp|Q96C24|SYTL4_HUMAN	-0.600687	-0.417931	Not Interesting
104017	g19881	sp|Q96C24|SYTL4_HUMAN	0.798723	0.817393	Not Interesting
104024	g19882	NA	0.968267	1.17243	Not Interesting
104027	g19883	NA	0.831604	1.53916	Not Interesting
104028	g19883	NA	0.872601	1.64288	Not Interesting
104030	g19883	NA	1.53901	1.69584	Not Interesting
104032	g19881	sp|Q96C24|SYTL4_HUMAN	1.02325	1.29776	Not Interesting
104033	g19881	sp|Q96C24|SYTL4_HUMAN	1.02671	1.26134	Not Interesting
104056	g19890	NA	0.994892	1.3143	Not Interesting
104057	g19890	NA	0.635917	1.4529	Not Interesting
104058	g19890	NA	0.702733	0.469524	Not Interesting
104064	g19891	NA	1.10725	1.25963	Not Interesting
104068	g19892	sp|Q12955|ANK3_HUMAN	0.695879	1.3762	Not Interesting
104084	g19903	NA	0.489034	0.628875	Not Interesting
104121	g19917	NA	-0.45546	-0.461138	Not Interesting
104128	g19918	sp|P62912|RL32_RAT	-0.321508	-0.602519	Not Interesting
104149	g19927	sp|P06727|APOA4_HUMAN	3.20493	2.52988	Not Interesting
104184	g19935	sp|Q4G061|EIF3B_RAT	0.6859	1.15859	Not Interesting
104192	g19936	sp|Q8R0H9|GGA1_MOUSE	0.477841	0.982606	Not Interesting
104208	g26184	NA	-0.964666	-1.63952	Not Interesting
104258	g11765	sp|P54366|GSC_DROME	0.819423	0.646239	Not Interesting
10427	g4271	sp|Q60803|TRAF3_MOUSE	0.773767	0.719115	Not Interesting
104272	g11767	sp|Q7ZUS1|VRK1_DANRE	-0.606081	-0.744244	Not Interesting
104278	g11767	sp|Q7ZUS1|VRK1_DANRE	1.61408	0.503497	Not Interesting
104279	g11767	sp|Q7ZUS1|VRK1_DANRE	1.57742	0.782485	Not Interesting
10428	g4271	sp|Q60803|TRAF3_MOUSE	0.717864	1.25507	Not Interesting
104281	g11768	NA	1.93349	0.786963	Not Interesting
104282	g11769	sp|Q7M3K2|PELET_DROME	2.23905	1.2798	Not Interesting
104285	g11769	sp|Q7M3K2|PELET_DROME	0.951093	0.151729	Not Interesting
104322	g32458	sp|Q63472|KCNH1_RAT	-0.82457	-1.2065	Not Interesting
104323	g32458	sp|Q63472|KCNH1_RAT	-0.825972	-1.02479	Not Interesting
104344	g32462	NA	-0.636993	-1.30465	Not Interesting
104355	g24080	sp|E9Q5R7|NAL12_MOUSE	0.483025	1.11067	Not Interesting
104396	g24094	sp|P24257|WNT1_DANRE	-0.676076	-1.4297	Not Interesting
10441	g4273	NA	-1.05433	-1.00375	Not Interesting
104477	g24113	NA	-0.291903	-0.507522	Not Interesting
104481	g24114	sp|Q28FN6|OTX2_XENTR	-0.59929	-0.261368	Not Interesting
104484	g24114	sp|Q28FN6|OTX2_XENTR	0.631693	0.619738	Not Interesting
104521	g24118	sp|P62925|IF5A_SPOFR	0.778383	0.473877	Not Interesting
104526	g24123	sp|Q9ULJ8|NEB1_HUMAN	1.00421	0.771707	Not Interesting
104527	g24123	sp|Q9ULJ8|NEB1_HUMAN	-0.386196	-0.575463	Not Interesting
104545	g24125	sp|Q4R381|EZH2_MACFA	0.0511065	1.15154	Not Interesting
104560	g24130	sp|Q80ZD3|S2611_MOUSE	0.322231	0.496811	Not Interesting
104573	g24133	NA	-0.641805	-1.34242	Not Interesting
104576	g24133	NA	-0.933472	-0.699156	Not Interesting
104596	g11632	sp|Q9R160|ADA24_MOUSE	-0.935428	-1.44688	Not Interesting
104597	g11632	sp|Q9R160|ADA24_MOUSE	-0.425489	-1.08943	Not Interesting
104608	g11632	sp|Q9R160|ADA24_MOUSE	-0.431087	-0.594827	Not Interesting
104612	g11633	sp|Q96RW7|HMCN1_HUMAN	-1.23787	-0.934116	Not Interesting
104615	g11636	NA	-0.671078	-0.771829	Not Interesting
104617	g11637	NA	-1.42884	-2.24744	Not Interesting
104618	g11637	NA	-1.0477	-0.725574	Not Interesting
104651	g5257	NA	1.05229	1.17636	Not Interesting
104690	g2525	NA	-0.435204	-0.799882	Not Interesting
104704	g13031	NA	-1.40127	-0.958313	Not Interesting
104726	g6434	NA	-0.257632	-0.476835	Not Interesting
104797	g6456	sp|Q2V2M9|FHOD3_HUMAN	0.773689	1.02382	Not Interesting
104812	g6457	sp|P11274|BCR_HUMAN	0.557099	0.924427	Not Interesting
104814	g6457	sp|P11274|BCR_HUMAN	1.0441	0.444525	Not Interesting
104834	g6470	NA	-1.23346	-1.70084	Not Interesting
104835	g6470	NA	-0.357469	-0.444792	Not Interesting
104841	g6470	NA	-0.518545	-0.714634	Not Interesting
104842	g6470	NA	-1.00095	-1.27981	Not Interesting
104856	g17327	NA	1.26221	1.53979	Not Interesting
104865	g17328	sp|Q5FVG6|PRR5_RAT	-0.496385	-0.642714	Not Interesting
104866	g17328	sp|Q5FVG6|PRR5_RAT	-0.719401	-1.23141	Not Interesting
104867	g17329	NA	-0.409366	-0.601258	Not Interesting
10488	g1418	NA	-0.528389	-0.441492	Not Interesting
104894	g17344	NA	0.39706	0.875721	Not Interesting
104896	g17344	NA	-0.521274	-0.699663	Not Interesting
104897	g17344	NA	1.151	1.15803	Not Interesting
104906	g17345	sp|Q91713|CHRD_XENLA	-0.442538	-0.846492	Not Interesting
104919	g17348	sp|A0A0K3AWM6|MOM5_CAEEL	-0.965001	-0.382549	Not Interesting
104922	g17348	sp|A0A0K3AWM6|MOM5_CAEEL	-0.469855	-0.355173	Not Interesting
104941	g17358	NA	-0.220935	-0.580523	Not Interesting
104961	g17363	sp|Q2PZL6|FAT4_MOUSE	-0.506551	-0.388922	Not Interesting
104966	g17363	sp|Q2PZL6|FAT4_MOUSE	0.998199	1.04319	Not Interesting
104993	g17367	NA	-1.01218	-0.565411	Not Interesting
105011	g17371	sp|Q5F408|SYCC_CHICK	0.71421	1.06468	Not Interesting
105013	g17371	sp|Q5F408|SYCC_CHICK	1.06788	1.18818	Not Interesting
105066	g31141	NA	0.430004	1.36897	Not Interesting
105126	g25353	sp|O14974|MYPT1_HUMAN	-0.277773	-1.05216	Not Interesting
105128	g25353	sp|O14974|MYPT1_HUMAN	-0.644832	-0.983947	Not Interesting
105130	g25354	sp|Q86WC6|PPR27_HUMAN	-0.928667	-0.990106	Not Interesting
105135	g25356	sp|P35555|FBN1_HUMAN	-0.495113	-0.673751	Not Interesting
105136	g25356	sp|P35555|FBN1_HUMAN	-2.0725	-2.3081	Not Interesting
105138	g25356	sp|P35555|FBN1_HUMAN	-0.854756	-1.40991	Not Interesting
105139	g25356	sp|P35555|FBN1_HUMAN	-0.667938	-1.57543	Not Interesting
105155	g25361	NA	0.855076	1.81758	Not Interesting
105157	g25361	NA	-1.16719	-1.23883	Not Interesting
105164	g25361	NA	0.849545	0.986168	Not Interesting
105189	g25362	sp|O88281|MEGF6_RAT	2.50851	3.51285	Not Interesting
105191	g25362	sp|O88281|MEGF6_RAT	1.20706	1.17018	Not Interesting
105192	g25362	sp|O88281|MEGF6_RAT	1.48446	1.69461	Not Interesting
105194	g25362	sp|O88281|MEGF6_RAT	1.50911	1.50737	Not Interesting
105202	g25363	NA	-1.16532	-1.6015	Not Interesting
105222	g25366	NA	0.437772	0.293001	Not Interesting
105244	g8207	sp|Q7Z494|NPHP3_HUMAN	0.705935	0.595255	Not Interesting
105249	g28927	NA	-0.988729	-1.22183	Not Interesting
105293	g28938	sp|O18866|KCMA1_PIG	-0.936044	-0.929565	Not Interesting
105344	g28957	sp|Q41596|CHI1_THECC	-0.632754	-0.199493	Not Interesting
105352	g28960	sp|Q09225|NRF6_CAEEL	-0.713608	-1.30712	Not Interesting
105353	g28960	sp|Q09225|NRF6_CAEEL	-0.78347	-1.01915	Not Interesting
105354	g28961	sp|Q8K0Q5|RHG18_MOUSE	-0.397335	-0.898977	Not Interesting
105361	g28961	sp|Q8K0Q5|RHG18_MOUSE	0.803809	1.09951	Not Interesting
105384	g28965	sp|Q8IYH5|ZZZ3_HUMAN	1.04514	0.765473	Not Interesting
105386	g28966	sp|P49908|SEPP1_HUMAN	0.93405	0.561816	Not Interesting
105395	g28971	NA	-0.393163	-0.705224	Not Interesting
105396	g28971	NA	-0.277764	-0.633204	Not Interesting
105413	g28977	sp|Q9Z0J4|NOS1_MOUSE	-0.316716	-0.694013	Not Interesting
105429	g28981	sp|Q9CUX1|P52K_MOUSE	-0.761397	-0.998183	Not Interesting
105432	g28980	sp|Q6MG82|PRRT1_RAT	0.401819	0.558657	Not Interesting
105461	g28987	NA	0.371227	0.711418	Not Interesting
105464	g28988	NA	0.299989	0.948601	Not Interesting
105466	g28988	NA	-0.461881	-0.524042	Not Interesting
10547	g23930	sp|A2AAY5|SPD2B_MOUSE	0.233655	0.714964	Not Interesting
105476	g28990	NA	1.08605	0.612702	Not Interesting
105496	g28992	sp|O76360|EGL4_CAEEL	-0.35178	-0.493655	Not Interesting
105510	g14992	NA	-0.641859	-1.04408	Not Interesting
105511	g14992	NA	-1.08309	-1.10008	Not Interesting
105546	g2054	sp|Q5BL35|SPOLA_DANRE	-0.42767	-0.624267	Not Interesting
105579	g11301	sp|Q7T1N4|ASIC1_OPSTA	-0.765271	-0.72166	Not Interesting
10558	g23930	sp|A2AAY5|SPD2B_MOUSE	0.395474	1.38274	Not Interesting
105593	g11302	sp|P55926|ASIC1_RAT	-0.799479	-0.945391	Not Interesting
10562	g23931	sp|P16333|NCK1_HUMAN	0.782953	0.960562	Not Interesting
105791	g32489	sp|P53452|DRD1L_TAKRU	-0.694329	-0.821054	Not Interesting
105793	g32490	NA	-0.325757	-0.642373	Not Interesting
105815	g32493	NA	-0.686821	-0.790682	Not Interesting
105843	g32500	NA	-0.825822	-0.871044	Not Interesting
105845	g32501	NA	-0.428923	-0.625034	Not Interesting
105862	g32507	sp|Q6Q0N3|NT5D2_RAT	0.322608	0.555862	Not Interesting
105924	g12758	sp|O70257|STX7_RAT	0.668662	1.33382	Not Interesting
105975	g12776	sp|Q9Y673|ALG5_HUMAN	0.644285	0.471785	Not Interesting
105979	g12777	sp|Q5HZI1|MTUS1_MOUSE	-1.09098	-1.04548	Not Interesting
105981	g12777	sp|Q5HZI1|MTUS1_MOUSE	-0.524319	-0.816867	Not Interesting
105983	g12777	sp|Q5HZI1|MTUS1_MOUSE	-0.755648	-0.728844	Not Interesting
106008	g12785	sp|P9WJI5|NAT_MYCTU	0.832607	1.06423	Not Interesting
106011	g12786	sp|Q9Y4A0|JERKL_HUMAN	-1.24819	-0.711598	Not Interesting
106019	g12789	sp|Q9Z1Z2|STRAP_MOUSE	0.56189	0.362978	Not Interesting
106044	g6274	NA	-0.955121	-0.593681	Not Interesting
106054	g6276	sp|P51957|NEK4_HUMAN	-0.664183	-0.878988	Not Interesting
106063	g6277	sp|Q9ET47|ESPN_MOUSE	1.21476	0.807593	Not Interesting
106065	g6278	NA	-0.0987002	-0.840866	Not Interesting
106085	g6287	NA	-0.403979	-0.567462	Not Interesting
106134	g6319	sp|P35317|AT1A_HYDVU	1.36626	0.963066	Not Interesting
106142	g6320	sp|P35317|AT1A_HYDVU	0.775869	0.703625	Not Interesting
106145	g6320	sp|P35317|AT1A_HYDVU	0.723333	1.12535	Not Interesting
106165	g6326	sp|Q91880|SUH_XENLA	0.730723	1.16741	Not Interesting
106166	g6326	sp|Q91880|SUH_XENLA	0.428608	0.788104	Not Interesting
106175	g6327	NA	-0.475903	-0.663711	Not Interesting
106194	g6340	sp|P60484|PTEN_HUMAN	1.80241	1.58761	Not Interesting
10620	g23949	sp|Q17P71|T23O_AEDAE	-0.36105	-0.937129	Not Interesting
106209	g6345	NA	-0.421223	-1.01014	Not Interesting
106219	g6354	sp|Q91YN5|UAP1_MOUSE	2.29736	2.0854	Not Interesting
106220	g6354	sp|Q91YN5|UAP1_MOUSE	0.453041	0.4664	Not Interesting
106267	g4713	sp|Q9ULH7|MKL2_HUMAN	0.689918	0.867839	Not Interesting
106268	g4713	sp|Q9ULH7|MKL2_HUMAN	0.901626	1.06689	Not Interesting
106315	g4723	NA	0.942737	0.56419	Not Interesting
106323	g4725	sp|P34257|TC3A_CAEEL	0.37491	0.561683	Not Interesting
106325	g4725	sp|P34257|TC3A_CAEEL	-1.06859	-1.57893	Not Interesting
106380	g15087	sp|P14755|CRYL1_RABIT	-0.803323	-0.715956	Not Interesting
106382	g15088	NA	-0.520108	-0.552751	Not Interesting
106427	g27861	NA	-0.348308	-0.679642	Not Interesting
106439	g27862	sp|Q9EQD2|NPFF2_RAT	1.0639	0.809536	Not Interesting
106440	g27862	sp|Q9EQD2|NPFF2_RAT	1.3066	1.04274	Not Interesting
106446	g27862	sp|Q9EQD2|NPFF2_RAT	-0.662673	-1.68868	Not Interesting
106450	g27863	sp|O62809|OX2R_PIG	0.565186	0.659455	Not Interesting
106464	g27869	sp|A5JYQ9|VMA21_CAEEL	-0.856903	-1.14677	Not Interesting
106474	g27871	NA	0.81115	0.682441	Not Interesting
106510	g27891	sp|Q9QZH0|FZD4_RAT	-0.438945	-0.359666	Not Interesting
10652	g8672	sp|Q505D1|ANR28_MOUSE	-0.356725	-0.672651	Not Interesting
106526	g27896	sp|P12027|PSGP_ONCMY	-1.31679	-1.29917	Not Interesting
106527	g27896	sp|P12027|PSGP_ONCMY	-0.761581	-0.552917	Not Interesting
106568	g27577	sp|Q99569|PKP4_HUMAN	0.874345	0.645507	Not Interesting
106576	g27579	NA	-0.464559	-0.523951	Not Interesting
106665	g3995	NA	-0.544532	-0.778617	Not Interesting
106671	g3996	sp|Q6TGZ4|THA11_DANRE	-0.244617	-1.06338	Not Interesting
106672	g3996	sp|Q6TGZ4|THA11_DANRE	-0.345848	-0.506225	Not Interesting
106715	g4001	sp|O61462|RL37A_CRYST	0.357353	0.746483	Not Interesting
106745	g4004	sp|Q16820|MEP1B_HUMAN	-0.745149	-0.639165	Not Interesting
106764	g4007	sp|Q8NBF6|AVL9_HUMAN	0.534055	0.610919	Not Interesting
106775	g4015	NA	-0.524926	-0.446357	Not Interesting
106817	g4024	NA	-0.433491	-0.576255	Not Interesting
106829	g4027	NA	-0.185959	-0.502823	Not Interesting
10686	g8683	sp|Q5TYQ1|ZYG11_DANRE	1.19995	0.903987	Not Interesting
106934	g28766	NA	-0.452195	-0.882043	Not Interesting
106947	g33324	NA	1.99456	3.15801	Not Interesting
106949	g33324	NA	0.794133	0.726527	Not Interesting
106951	g33324	NA	2.08248	3.02295	Not Interesting
106953	g33325	NA	1.45781	2.79116	Not Interesting
106974	g33331	NA	-0.782442	-0.581766	Not Interesting
106994	g33344	sp|Q39433|RB1BV_BETVU	0.382321	2.12273	Not Interesting
107058	g33359	NA	-0.647286	-0.63058	Not Interesting
107060	g33359	NA	-0.643813	-1.03822	Not Interesting
107079	g33363	NA	-0.911473	-1.30973	Not Interesting
107096	g33369	NA	-0.581777	-0.454318	Not Interesting
107103	g31829	sp|P70270|RAD54_MOUSE	-0.596909	-0.573215	Not Interesting
10711	g26469	sp|Q4FZ58|RTN2_XENTR	-0.678564	-0.727372	Not Interesting
107111	g31832	NA	1.03047	0.503635	Not Interesting
107115	g31835	sp|P53794|SC5A3_HUMAN	0.926658	0.780684	Not Interesting
107140	g31850	NA	-0.567119	-0.76193	Not Interesting
107171	g26711	sp|Q6P9K8|CSKI1_MOUSE	-1.20213	-0.740974	Not Interesting
107200	g25605	NA	-0.373234	-1.15003	Not Interesting
107208	g25612	NA	-0.480807	-1.33933	Not Interesting
107219	g25624	NA	-0.332835	-0.453189	Not Interesting
107264	g25647	sp|Q62441|TLE4_MOUSE	-0.346997	-0.434659	Not Interesting
107267	g25647	sp|Q62441|TLE4_MOUSE	-0.463423	-0.400111	Not Interesting
107269	g25647	sp|Q62441|TLE4_MOUSE	-0.402069	-0.431361	Not Interesting
107276	g25651	sp|Q9UPR3|SMG5_HUMAN	0.485177	1.33477	Not Interesting
107278	g25651	sp|Q9UPR3|SMG5_HUMAN	0.745934	1.30254	Not Interesting
107309	g25657	sp|Q26473|SEM1A_SCHAM	0.427221	0.532977	Not Interesting
107325	g280	NA	-0.864669	-1.0064	Not Interesting
107326	g280	NA	-0.908642	-0.925421	Not Interesting
107370	g295	NA	-0.810134	-0.710935	Not Interesting
107372	g296	sp|B2RYD2|ESRP1_RAT	0.619826	0.936605	Not Interesting
107437	g835	sp|Q2TBE0|C19L2_HUMAN	0.567568	0.497898	Not Interesting
107443	g835	sp|Q2TBE0|C19L2_HUMAN	-0.652169	0.0276686	Not Interesting
107448	g837	sp|Q18PD9|DOK7_TAKRU	-0.513047	-0.473461	Not Interesting
107451	g838	NA	-0.894602	-0.807391	Not Interesting
107468	g845	NA	0.321114	0.582694	Not Interesting
107472	g847	sp|Q5RFI5|FUCO2_PONAB	0.182015	0.405461	Not Interesting
107476	g850	NA	1.70851	1.03663	Not Interesting
107478	g850	NA	1.2441	1.10793	Not Interesting
107489	g851	sp|Q7K4Q5|Y0417_DROME	1.32215	1.18004	Not Interesting
107493	g856	sp|Q503V9|ENDUB_DANRE	0.432764	0.774485	Not Interesting
10753	g6701	sp|Q9Y2L5|TPPC8_HUMAN	-0.774756	-0.5589	Not Interesting
107543	g864	sp|Q0VD19|ASM_BOVIN	0.719627	1.37024	Not Interesting
107555	g869	sp|Q498J9|MBLC1_XENLA	0.287593	0.558843	Not Interesting
107581	g873	NA	0.82695	0.955451	Not Interesting
107589	g874	NA	2.81303	2.06801	Not Interesting
107591	g874	NA	1.26179	0.956733	Not Interesting
107592	g874	NA	1.84543	1.51402	Not Interesting
107597	g875	NA	0.681904	0.787672	Not Interesting
107609	g877	sp|P51958|CDK1_CARAU	-0.383595	-0.785279	Not Interesting
107617	g879	NA	0.893531	0.748223	Not Interesting
107618	g879	NA	-1.72706	-1.21452	Not Interesting
107640	g888	sp|Q9DBD2|MARH8_MOUSE	-0.39672	-0.734655	Not Interesting
107654	g891	sp|Q96B26|EXOS8_HUMAN	-0.594411	-1.04953	Not Interesting
107697	g899	NA	-0.410339	-0.568369	Not Interesting
107704	g900	sp|P34743|BTG1_CHICK	-0.305194	-0.398474	Not Interesting
107779	g929	sp|Q6ZVD7|STOX1_HUMAN	-0.154076	-0.650125	Not Interesting
107781	g929	sp|Q6ZVD7|STOX1_HUMAN	-0.996115	-2.26032	Not Interesting
107817	g944	sp|E1BLZ4|ZFY26_BOVIN	0.936295	0.627128	Not Interesting
107833	g947	sp|P61150|FGF12_RAT	-0.40954	-1.01787	Not Interesting
107834	g947	sp|P61150|FGF12_RAT	-0.405968	-1.04184	Not Interesting
107836	g947	sp|P61150|FGF12_RAT	1.28732	0.633336	Not Interesting
107841	g947	sp|P61150|FGF12_RAT	1.8714	1.49804	Not Interesting
107852	g948	sp|P53992|SC24C_HUMAN	0.83386	1.07117	Not Interesting
107858	g949	sp|Q4GZT3|PKD2_BOVIN	-0.771811	-1.13262	Not Interesting
107937	g31219	NA	-0.407707	-0.933888	Not Interesting
107979	g31223	sp|Q62865|PDE3A_RAT	-0.264152	-0.364758	Not Interesting
108026	g31231	sp|Q801X6|PHAR1_CHICK	-1.19874	-1.18653	Not Interesting
108041	g31234	sp|P23468|PTPRD_HUMAN	-0.567753	-1.00742	Not Interesting
108078	g31249	sp|Q27312|NADA_APLKU	-0.343189	-0.740797	Not Interesting
108109	g31254	sp|Q5VAN0|CD38_MACFA	-0.942602	-1.20477	Not Interesting
10811	g2809	NA	0.53417	0.671801	Not Interesting
10815	g2809	NA	1.00332	1.45941	Not Interesting
108159	g15915	NA	0.917863	0.950933	Not Interesting
108160	g15915	NA	-0.847764	-0.655264	Not Interesting
108195	g5701	sp|A7S1L6|FUCT1_NEMVE	-0.384586	-0.198119	Not Interesting
108225	g5707	NA	1.60374	1.53631	Not Interesting
108245	g5714	NA	-0.943913	-1.00112	Not Interesting
108284	g5728	sp|Q0P5D3|CCND2_BOVIN	-0.459107	-0.373915	Not Interesting
108286	g5728	sp|Q0P5D3|CCND2_BOVIN	-0.462985	-0.696438	Not Interesting
108287	g5729	sp|P21328|RTJK_DROME	-0.517816	-0.905291	Not Interesting
108289	g5729	sp|P21328|RTJK_DROME	0.73638	0.591007	Not Interesting
108297	g5731	sp|E1BE02|E2F7_BOVIN	-0.318192	-0.579823	Not Interesting
108316	g5732	sp|P27708|PYR1_HUMAN	-0.493785	-0.550256	Not Interesting
108325	g5734	sp|Q91437|PYR1_SQUAC	-0.655507	-0.786934	Not Interesting
108327	g5734	sp|Q91437|PYR1_SQUAC	-0.58305	-0.653556	Not Interesting
108332	g5735	sp|O54834|RHG06_MOUSE	-0.648909	-0.745208	Not Interesting
108333	g5735	sp|O54834|RHG06_MOUSE	-0.868855	-0.371523	Not Interesting
108344	g5735	sp|O54834|RHG06_MOUSE	-1.02307	-1.18681	Not Interesting
108345	g5735	sp|O54834|RHG06_MOUSE	-0.959938	-1.60182	Not Interesting
108346	g5735	sp|O54834|RHG06_MOUSE	-0.908009	-0.982465	Not Interesting
108353	g5736	sp|Q921M7|FA49B_MOUSE	0.650294	0.723453	Not Interesting
108355	g5737	sp|Q4N4N8|TXND_THEPA	0.535013	0.712234	Not Interesting
108368	g5747	NA	0.913865	0.976327	Not Interesting
10837	g2816	NA	-0.84232	-1.09671	Not Interesting
10838	g2817	NA	-0.736306	-1.27984	Not Interesting
108383	NA	NA	-0.436802	-0.777279	Not Interesting
108408	g18409	sp|Q9WVM7|AIMP2_CRIGR	0.685784	0.602851	Not Interesting
108425	g18412	sp|P23004|QCR2_BOVIN	-0.658974	-0.783826	Not Interesting
108461	g18420	NA	-0.632647	-0.0502454	Not Interesting
108462	g18420	NA	-0.730516	-0.12859	Not Interesting
108470	g18421	sp|P38984|RSSA_HYDVD	1.84589	1.91878	Not Interesting
108473	g18422	NA	-0.406156	-0.834972	Not Interesting
10853	g2819	NA	-0.768701	-1.17698	Not Interesting
108549	g18436	sp|Q6AXS4|RENR_RAT	1.18656	1.18838	Not Interesting
108550	g18436	sp|Q6AXS4|RENR_RAT	0.541816	0.322536	Not Interesting
108558	g18437	NA	0.392536	0.785945	Not Interesting
108576	g18442	NA	-0.372088	-0.460973	Not Interesting
10858	g2830	sp|P10090|WHITE_DROME	0.847498	1.43042	Not Interesting
108593	g18448	NA	0.613307	0.559935	Not Interesting
10860	g2830	sp|P10090|WHITE_DROME	-0.0985238	0.686148	Not Interesting
108600	g18449	sp|Q86SQ0|PHLB2_HUMAN	-0.840878	-0.647537	Not Interesting
108601	g18449	sp|Q86SQ0|PHLB2_HUMAN	-0.411088	-0.712881	Not Interesting
108623	g18466	sp|P07524|TYRO_STRAT	1.48902	2.98297	Not Interesting
108624	g18466	sp|P07524|TYRO_STRAT	0.586534	0.550888	Not Interesting
10863	g2831	NA	-0.435575	0.698807	Not Interesting
108630	g18467	sp|Q9Y5P8|P2R3B_HUMAN	0.909351	1.73383	Not Interesting
108644	g18475	sp|Q5TJ56|FORF_DICDI	-0.934048	-1.00937	Not Interesting
108646	g18476	NA	-0.803645	-1.04131	Not Interesting
108649	g18478	sp|Q9CXV1|DHSD_MOUSE	-1.29715	-1.54406	Not Interesting
108650	g18478	sp|Q9CXV1|DHSD_MOUSE	-0.366312	-0.754351	Not Interesting
108655	g18480	sp|Q5FVK8|AL14E_RAT	1.5641	1.25421	Not Interesting
108671	g18492	sp|Q6ZW76|ANKS3_HUMAN	-1.47326	-0.953568	Not Interesting
108675	g18492	sp|Q6ZW76|ANKS3_HUMAN	-0.165262	-0.914943	Not Interesting
108677	g18492	sp|Q6ZW76|ANKS3_HUMAN	-1.59416	-1.86516	Not Interesting
108681	g18492	sp|Q6ZW76|ANKS3_HUMAN	-0.756992	-0.196733	Not Interesting
108701	g14399	sp|P50123|AMPE_RAT	0.898559	0.981427	Not Interesting
108710	g14402	sp|Q6DG32|S2536_DANRE	1.38876	1.76848	Not Interesting
108711	g14402	sp|Q6DG32|S2536_DANRE	0.876304	1.99185	Not Interesting
108712	g14403	sp|Q9CX48|ZCH10_MOUSE	1.08538	1.08666	Not Interesting
108716	g14404	sp|P46926|GNPI1_HUMAN	1.21881	1.79777	Not Interesting
108717	g14404	sp|P46926|GNPI1_HUMAN	0.86062	1.54116	Not Interesting
108718	g14404	sp|P46926|GNPI1_HUMAN	0.359545	0.727897	Not Interesting
108719	g14404	sp|P46926|GNPI1_HUMAN	0.689863	1.53919	Not Interesting
108746	g14409	NA	-0.0539737	-0.76131	Not Interesting
10875	g2832	NA	0.85316	0.71681	Not Interesting
108759	g31427	NA	-0.866128	-0.868967	Not Interesting
108764	g31427	NA	-0.660218	-0.666033	Not Interesting
108765	g31427	NA	-0.816399	-1.05854	Not Interesting
108769	g31427	NA	-0.800966	-1.13317	Not Interesting
108780	g31433	sp|P03010|TRAC9_MAIZE	0.585924	0.488416	Not Interesting
108785	g31434	sp|O15973|OPSD1_MIZYE	0.937906	0.479612	Not Interesting
108788	g31434	sp|O15973|OPSD1_MIZYE	-0.684563	-1.6177	Not Interesting
108789	g31434	sp|O15973|OPSD1_MIZYE	-0.136226	-1.0868	Not Interesting
108793	g31435	sp|P97295|NPY2R_MOUSE	-0.634492	-0.779997	Not Interesting
108796	g31435	sp|P97295|NPY2R_MOUSE	-0.378884	-0.625062	Not Interesting
108797	g31435	sp|P97295|NPY2R_MOUSE	-0.505903	-0.507648	Not Interesting
108803	g31437	sp|P03934|TC1A_CAEEL	-0.293874	-0.606117	Not Interesting
108824	g31440	sp|P25931|NPYR_DROME	-0.272991	-0.451787	Not Interesting
108828	g31440	sp|P25931|NPYR_DROME	-0.67512	-0.658629	Not Interesting
108830	g31440	sp|P25931|NPYR_DROME	-0.567518	-0.871686	Not Interesting
108831	g31441	sp|Q6PFK1|ZN598_DANRE	-0.884076	-0.936125	Not Interesting
108836	g31441	sp|Q6PFK1|ZN598_DANRE	-0.378886	-0.742505	Not Interesting
108851	g31445	NA	-0.505278	-0.815389	Not Interesting
108852	g31445	NA	-1.98498	-1.88028	Not Interesting
108853	g31445	NA	-0.175708	-0.858399	Not Interesting
108856	g31445	NA	-0.837699	-0.85879	Not Interesting
108866	g31447	sp|Q91W20|LRC26_MOUSE	-0.335581	-0.476262	Not Interesting
108867	g31447	sp|Q91W20|LRC26_MOUSE	-1.09871	-0.734559	Not Interesting
108868	g31447	sp|Q91W20|LRC26_MOUSE	-0.598079	-0.569778	Not Interesting
10889	g2833	NA	-0.743948	-0.54103	Not Interesting
10890	g2833	NA	-0.696051	-0.659187	Not Interesting
108901	g31460	sp|Q7Z494|NPHP3_HUMAN	-0.53314	-0.734795	Not Interesting
108910	g31461	sp|Q7Z494|NPHP3_HUMAN	0.854761	0.71675	Not Interesting
108916	g31462	sp|P17126|ACT_HYDVU	0.300273	0.815428	Not Interesting
108918	g31462	sp|P17126|ACT_HYDVU	0.642761	0.5719	Not Interesting
108920	g31462	sp|P17126|ACT_HYDVU	1.02391	1.15009	Not Interesting
108929	g31464	sp|Q149F3|ERF3B_MOUSE	-0.795592	-2.0557	Not Interesting
108940	g31467	NA	0.756225	0.835036	Not Interesting
10895	g2834	sp|Q1ZXH8|GXCDD_DICDI	0.560135	0.783567	Not Interesting
108952	g31118	NA	0.810934	0.600576	Not Interesting
10896	g2834	sp|Q1ZXH8|GXCDD_DICDI	1.09571	1.0185	Not Interesting
108979	g31121	NA	-1.09076	-0.78507	Not Interesting
109018	g27210	NA	-0.801952	-0.516642	Not Interesting
109023	g27211	sp|Q14161|GIT2_HUMAN	0.648997	1.07294	Not Interesting
109025	g27211	sp|Q14161|GIT2_HUMAN	0.646576	1.17023	Not Interesting
109026	g27211	sp|Q14161|GIT2_HUMAN	-0.460312	-0.732367	Not Interesting
109045	g27218	sp|P98154|IDD_MOUSE	-0.638213	-0.870855	Not Interesting
109067	g27219	sp|P53814|SMTN_HUMAN	-0.919409	-1.08825	Not Interesting
109071	g27219	sp|P53814|SMTN_HUMAN	-1.38871	-1.13118	Not Interesting
109074	g27219	sp|P53814|SMTN_HUMAN	0.65953	0.816637	Not Interesting
10908	g2837	sp|P10090|WHITE_DROME	1.80358	1.03639	Not Interesting
109099	g27223	NA	-0.890289	-1.68565	Not Interesting
109108	g27225	NA	-1.48903	-0.706269	Not Interesting
109110	g27225	NA	-0.972802	-0.967346	Not Interesting
109111	g27225	NA	-0.254032	-0.503905	Not Interesting
109115	g16419	NA	0.917754	0.842197	Not Interesting
109123	g16497	NA	-0.419736	-0.920674	Not Interesting
109156	g16503	sp|P56696|KCNQ4_HUMAN	-0.696662	-1.15504	Not Interesting
10919	NA	NA	-0.579052	-0.799167	Not Interesting
109253	g16541	NA	0.979248	1.03298	Not Interesting
109257	g16543	NA	0.675756	0.636317	Not Interesting
109300	g16549	sp|Q8BHJ5|TBL1R_MOUSE	-0.48342	-0.560057	Not Interesting
109302	g16549	sp|Q8BHJ5|TBL1R_MOUSE	0.240179	0.868571	Not Interesting
109313	g16556	NA	-0.350004	-0.751593	Not Interesting
109315	g16556	NA	-0.252094	-0.737888	Not Interesting
109321	g16557	sp|Q09604|VAB15_CAEEL	-1.28028	-0.555078	Not Interesting
109324	g16557	sp|Q09604|VAB15_CAEEL	-1.22606	-0.63672	Not Interesting
109334	g16558	sp|P72745|Y1101_SYNY3	1.24545	1.105	Not Interesting
109348	g5272	sp|Q9NSK0|KLC4_HUMAN	-1.06335	-0.709054	Not Interesting
109377	g5282	sp|Q9U5L1|SRPRA_DROME	0.59418	0.719568	Not Interesting
109394	g5289	sp|Q7ZUW2|HYOU1_DANRE	0.587514	0.939707	Not Interesting
109404	g20012	NA	-0.445872	-0.789789	Not Interesting
109409	g20013	NA	-0.62504	-0.880577	Not Interesting
10942	g2837	sp|P10090|WHITE_DROME	-0.487121	-0.778742	Not Interesting
10943	g2838	sp|P55075|FGF8_HUMAN	-0.833088	-0.93652	Not Interesting
109449	g32050	NA	-0.612785	-0.909642	Not Interesting
109450	g32050	NA	-0.438613	-1.02569	Not Interesting
109487	g17136	sp|P56696|KCNQ4_HUMAN	-1.09171	-1.03059	Not Interesting
109517	g17144	sp|Q9R0Y1|ASIC5_MOUSE	0.868004	0.863626	Not Interesting
109521	g17146	sp|Q7JQ07|MOS1T_DROMA	0.513384	0.85744	Not Interesting
109542	g17150	sp|Q02006|Y4233_RHOPA	0.875125	0.621427	Not Interesting
109578	g17155	NA	0.707092	0.646145	Not Interesting
109580	g17155	NA	0.992041	1.0444	Not Interesting
109582	g17156	NA	1.06129	0.8705	Not Interesting
10964	g2843	sp|Q96G97|BSCL2_HUMAN	0.851797	1.41684	Not Interesting
109700	g6520	sp|A0FGR8|ESYT2_HUMAN	0.111065	0.37581	Not Interesting
109713	g6525	NA	-1.03861	-1.36813	Not Interesting
109715	g6526	sp|P13116|SRC2_XENLA	-0.862971	-1.37051	Not Interesting
109725	g6527	sp|Q8TCB7|METL6_HUMAN	-0.653254	-0.617806	Not Interesting
109757	g6538	NA	-1.47823	-0.729778	Not Interesting
109758	g6538	NA	-1.43822	-1.05312	Not Interesting
109759	g6538	NA	-1.96756	-1.44479	Not Interesting
109760	g6538	NA	-1.00613	-0.96785	Not Interesting
109761	g6538	NA	-1.07948	-0.477664	Not Interesting
109783	g6546	sp|Q8K430|KLH17_RAT	1.26416	1.63042	Not Interesting
109788	g6547	NA	0.787696	0.486951	Not Interesting
109797	g6549	sp|Q9CYL5|GAPR1_MOUSE	0.888469	0.420392	Not Interesting
109802	g6549	sp|Q9CYL5|GAPR1_MOUSE	-0.374227	-0.906116	Not Interesting
109811	g6554	NA	-0.547045	-0.632636	Not Interesting
109814	g6554	NA	-0.606281	-0.769725	Not Interesting
109844	g6562	NA	-1.07149	-1.34549	Not Interesting
109858	g6563	sp|Q8R3S2|TSN33_MOUSE	-1.18455	-1.33245	Not Interesting
109872	g6567	sp|Q6UE39|GLT13_RAT	-0.340462	-0.686977	Not Interesting
109930	g1654	NA	-0.225674	-0.596202	Not Interesting
109949	g1666	sp|Q5ZJW4|SC22B_CHICK	0.439862	0.788082	Not Interesting
109960	g1668	sp|Q94K49|ALP1_ARATH	0.542841	0.013902	Not Interesting
109984	g1673	sp|D3YXG0|HMCN1_MOUSE	0.53637	0.715247	Not Interesting
1100	g13514	sp|Q9BX10|GTPB2_HUMAN	1.33157	1.45246	Not Interesting
110016	g15580	NA	0.618765	0.410257	Not Interesting
110020	g12824	sp|Q80TC5|POGK_MOUSE	-0.544421	-0.99078	Not Interesting
110080	g9138	sp|Q9QXA6|BAT1_MOUSE	-0.918891	-0.958246	Not Interesting
110109	g9162	NA	-0.894325	-0.944433	Not Interesting
110110	g9161	NA	-0.722607	-0.700497	Not Interesting
110131	g31948	sp|Q6GPQ3|MFSD8_XENLA	0.431508	0.853186	Not Interesting
110132	g31949	NA	-0.810842	-0.88385	Not Interesting
110175	g31954	sp|P42583|NKX25_XENLA	1.12277	0.822112	Not Interesting
110191	g31958	NA	-1.68245	-0.958557	Not Interesting
110192	g31959	NA	-1.17605	-0.678957	Not Interesting
110193	g31959	NA	-1.68275	-0.768675	Not Interesting
110196	g31959	NA	-1.14911	-0.429056	Not Interesting
110197	g31959	NA	0.679852	1.67902	Not Interesting
1102	g13514	sp|Q9BX10|GTPB2_HUMAN	1.09777	1.85151	Not Interesting
110246	g9491	NA	-0.923122	-0.935399	Not Interesting
110268	g9509	NA	1.49108	0.517209	Not Interesting
110285	g9512	NA	-0.286263	-0.671063	Not Interesting
110295	g29503	sp|Q8BGX0|TRI23_MOUSE	1.25919	1.54523	Not Interesting
1103	g13514	sp|Q9BX10|GTPB2_HUMAN	1.69941	2.13116	Not Interesting
110310	g29507	sp|Q0IJ05|OSBL9_XENTR	0.790761	0.774573	Not Interesting
110313	g29507	sp|Q0IJ05|OSBL9_XENTR	-0.308588	-0.996001	Not Interesting
110327	g29508	NA	0.565076	0.778109	Not Interesting
110379	g29527	sp|Q8VE97|SRSF4_MOUSE	0.551986	0.518511	Not Interesting
1104	g13514	sp|Q9BX10|GTPB2_HUMAN	2.74644	2.42266	Not Interesting
110417	g7438	sp|P54802|ANAG_HUMAN	-1.00945	-0.910389	Not Interesting
110418	g7438	sp|P54802|ANAG_HUMAN	-0.311993	-0.756437	Not Interesting
110491	g10198	NA	0.93874	0.430074	Not Interesting
110536	g13010	NA	-0.678671	-0.868048	Not Interesting
110561	g13017	sp|Q13591|SEM5A_HUMAN	-0.681811	-1.27839	Not Interesting
110573	g13020	sp|P16273|PRPX_HORVU	-0.710377	-0.688258	Not Interesting
110575	g13020	sp|P16273|PRPX_HORVU	-0.760721	-1.32974	Not Interesting
110582	g13026	NA	0.400402	0.891353	Not Interesting
110608	g9116	NA	2.06013	2.38971	Not Interesting
110613	g9118	NA	1.51771	1.56799	Not Interesting
110614	g9118	NA	2.19145	2.7103	Not Interesting
110699	g22610	sp|Q9NZJ5|E2AK3_HUMAN	0.602953	1.02833	Not Interesting
110701	g22610	sp|Q9NZJ5|E2AK3_HUMAN	0.432056	1.41751	Not Interesting
110719	g22612	sp|Q91827|AR1_XENLA	-0.974836	-0.917607	Not Interesting
110723	g22613	sp|Q0VD42|TM136_BOVIN	0.398654	0.629799	Not Interesting
110731	g22615	sp|Q8HYJ7|FUT5_GORGO	-0.492024	-0.836128	Not Interesting
110733	g22615	sp|Q8HYJ7|FUT5_GORGO	0.350896	1.24891	Not Interesting
11074	g1102	NA	1.04035	0.878005	Not Interesting
110741	g22615	sp|Q8HYJ7|FUT5_GORGO	2.72976	1.96195	Not Interesting
110743	g22616	sp|Q5DQR4|STB5L_MOUSE	2.20239	2.14902	Not Interesting
110744	g22616	sp|Q5DQR4|STB5L_MOUSE	0.943815	1.27191	Not Interesting
110800	g31753	NA	-0.716655	-0.985216	Not Interesting
110811	g31756	NA	-1.55026	-0.606234	Not Interesting
110855	g31794	sp|Q5R757|PLCD_PONAB	-0.187357	-0.593563	Not Interesting
110857	g31794	sp|Q5R757|PLCD_PONAB	-0.544202	-1.02428	Not Interesting
110869	g31795	sp|Q8ETH0|HMP_OCEIH	-0.48998	-0.46979	Not Interesting
110874	g31795	sp|Q8ETH0|HMP_OCEIH	-0.929625	-0.671948	Not Interesting
110875	g31795	sp|Q8ETH0|HMP_OCEIH	-1.00021	-1.04205	Not Interesting
110880	g31796	sp|Q6P816|YKT6_XENTR	1.07942	1.13477	Not Interesting
110881	g31796	sp|Q6P816|YKT6_XENTR	1.79262	1.15629	Not Interesting
110907	g31803	NA	-0.692113	-1.1284	Not Interesting
110911	g31803	NA	-0.786971	-0.608096	Not Interesting
110970	g18772	sp|Q626N3|TM151_CAEBR	-1.13476	-1.31976	Not Interesting
110984	g1122	NA	1.75301	1.73761	Not Interesting
110992	g1125	sp|Q00G26|PLIN5_HUMAN	1.1858	1.29249	Not Interesting
110993	g1125	sp|Q00G26|PLIN5_HUMAN	2.33831	1.43995	Not Interesting
110995	g1126	NA	1.95275	1.99785	Not Interesting
110997	g1127	sp|Q9NXR5|ANR10_HUMAN	-0.554841	-0.548969	Not Interesting
111004	g1128	NA	-0.595426	-0.929561	Not Interesting
111049	g1140	sp|G3V9H8|RET_RAT	-0.844099	-0.760047	Not Interesting
111067	g1145	sp|P35546|RET_MOUSE	-0.904357	-1.08145	Not Interesting
111102	g1155	sp|Q86HQ2|ABCG8_DICDI	-0.502856	-0.696664	Not Interesting
111105	g1155	sp|Q86HQ2|ABCG8_DICDI	-0.694553	-1.02946	Not Interesting
111226	NA	NA	1.07295	0.631785	Not Interesting
11127	g29711	sp|Q9BTV6|DPH7_HUMAN	-0.425438	-0.647436	Not Interesting
11130	g29711	sp|Q9BTV6|DPH7_HUMAN	0.739621	0.926058	Not Interesting
111300	g21198	NA	0.635653	0.479398	Not Interesting
111329	g21203	NA	-0.737357	-0.65455	Not Interesting
11133	g29711	sp|Q9BTV6|DPH7_HUMAN	1.32911	1.42764	Not Interesting
11134	g29711	sp|Q9BTV6|DPH7_HUMAN	1.61165	1.17823	Not Interesting
111361	g21209	NA	0.731586	0.830368	Not Interesting
111362	g21209	NA	0.57306	0.592272	Not Interesting
111387	g21219	sp|Q90623|MYPT1_CHICK	1.00375	0.894512	Not Interesting
111407	g21221	NA	-0.544224	-1.01469	Not Interesting
111437	g21227	NA	-0.31906	-0.764756	Not Interesting
111439	g21227	NA	-0.411821	-0.575091	Not Interesting
111444	g21228	sp|O88281|MEGF6_RAT	-0.274298	-0.69912	Not Interesting
111452	g21228	sp|O88281|MEGF6_RAT	-0.755319	-0.882847	Not Interesting
111467	g33476	NA	1.76271	2.13925	Not Interesting
111473	g33477	sp|Q24799|MYPH_ECHGR	-0.532946	-0.980636	Not Interesting
111477	g33477	sp|Q24799|MYPH_ECHGR	-0.227258	-0.672327	Not Interesting
111498	g33492	NA	-1.90051	-1.04722	Not Interesting
111499	g33492	NA	-0.68755	0.0480579	Not Interesting
111510	g33493	sp|B3LYS5|FOXO_DROAN	-1.26714	-0.986282	Not Interesting
111519	g33495	sp|P18583|SON_HUMAN	0.79083	0.74684	Not Interesting
111525	g33497	sp|Q01149|CO1A2_MOUSE	1.09223	1.33426	Not Interesting
111562	g23187	NA	-0.585966	-0.522956	Not Interesting
111573	g23187	NA	0.266508	1.13436	Not Interesting
111574	g23188	sp|P31646|S6A13_RAT	-0.592809	-0.51105	Not Interesting
111578	g23188	sp|P31646|S6A13_RAT	-0.286951	-0.656946	Not Interesting
111579	g23188	sp|P31646|S6A13_RAT	-0.795209	-1.10841	Not Interesting
111670	g14832	sp|B0UYT5|MFD6B_DANRE	-0.897097	-0.828822	Not Interesting
111673	g14832	sp|B0UYT5|MFD6B_DANRE	-0.393008	-0.773443	Not Interesting
111691	g14838	sp|Q8CBH5|MFSD6_MOUSE	-0.563976	-0.880014	Not Interesting
111713	g9166	sp|Q8UWA5|CAH2_TRIHK	1.17688	1.07689	Not Interesting
111714	g9166	sp|Q8UWA5|CAH2_TRIHK	-0.727037	-0.886028	Not Interesting
111718	g9166	sp|Q8UWA5|CAH2_TRIHK	-0.486678	-0.645446	Not Interesting
111755	g9170	sp|Q99808|S29A1_HUMAN	1.05126	0.843724	Not Interesting
111773	g9180	NA	-0.885684	-0.882916	Not Interesting
111808	g9187	sp|P0CG48|UBC_HUMAN	0.728171	0.544388	Not Interesting
111811	g9187	sp|P0CG48|UBC_HUMAN	0.545411	0.595048	Not Interesting
111851	g9206	sp|Q6AY20|MPRD_RAT	0.745486	1.26748	Not Interesting
111859	g9207	NA	0.605916	0.598482	Not Interesting
111904	g9222	sp|Q922K7|NOP2_MOUSE	0.243463	1.19214	Not Interesting
111940	g21939	NA	-0.288688	-0.631013	Not Interesting
111958	g21950	NA	4.72069	6.53932	Not Interesting
111971	g9892	NA	-0.199871	-0.674287	Not Interesting
111977	g9893	sp|Q2Q426|AGRE2_MACMU	-0.951274	-0.992524	Not Interesting
112012	g6898	sp|Q8JZM7|CDC73_MOUSE	-0.406367	-0.492652	Not Interesting
112045	g6916	NA	0.473132	1.25062	Not Interesting
112082	g7710	sp|Q54SR8|SGMC_DICDI	0.0803899	0.487158	Not Interesting
112119	g7722	sp|Q28I85|POC1A_XENTR	0.513055	0.41915	Not Interesting
112123	g7723	sp|Q8BH16|FBXL2_MOUSE	-0.959078	-0.532552	Not Interesting
112164	g7731	NA	1.14875	1.13311	Not Interesting
112166	g7731	NA	-0.717322	-0.736394	Not Interesting
112172	g7731	NA	-0.861136	-1.30775	Not Interesting
112182	g7731	NA	-0.721158	-0.94008	Not Interesting
112213	g410	sp|P31580|HCE1_ORYLA	0.358949	0.538802	Not Interesting
112217	g413	NA	-0.605987	-0.559783	Not Interesting
112218	g414	sp|G3X9K3|BIG1_MOUSE	1.1512	1.27306	Not Interesting
112226	g414	sp|G3X9K3|BIG1_MOUSE	-0.205053	-0.617727	Not Interesting
112235	g418	sp|Q96JS3|PGBD1_HUMAN	0.983204	0.341554	Not Interesting
11226	g29761	sp|P25927|BIGA_SALTY	-0.866788	-1.18257	Not Interesting
112267	g431	NA	0.677047	0.559075	Not Interesting
112283	g433	sp|Q9WV48|SHAN1_RAT	0.601722	-0.307769	Not Interesting
112307	g439	NA	0.747777	1.1674	Not Interesting
112316	g442	NA	-0.702637	-0.819974	Not Interesting
112337	g445	NA	-1.49523	-1.69114	Not Interesting
112340	g445	NA	-0.888334	-1.43816	Not Interesting
112344	g445	NA	-0.429423	-0.517842	Not Interesting
112359	g447	sp|Q8IZF6|AGRG4_HUMAN	-1.0876	-0.766553	Not Interesting
112360	g447	sp|Q8IZF6|AGRG4_HUMAN	-0.646301	-0.484587	Not Interesting
112361	g447	sp|Q8IZF6|AGRG4_HUMAN	-0.949059	-1.00626	Not Interesting
112368	g449	sp|Q9JHJ0|TMOD3_MOUSE	-0.818604	-0.92061	Not Interesting
112369	g449	sp|Q9JHJ0|TMOD3_MOUSE	-0.544968	-0.699334	Not Interesting
112370	g449	sp|Q9JHJ0|TMOD3_MOUSE	0.552293	0.545969	Not Interesting
112371	g449	sp|Q9JHJ0|TMOD3_MOUSE	-0.530833	-0.603003	Not Interesting
112372	g449	sp|Q9JHJ0|TMOD3_MOUSE	-1.14719	-1.09198	Not Interesting
112376	g449	sp|Q9JHJ0|TMOD3_MOUSE	-0.583613	-0.426529	Not Interesting
112386	g453	sp|P21213|HUTH_RAT	-0.668798	-0.457185	Not Interesting
112395	g453	sp|P21213|HUTH_RAT	-0.33411	-0.699443	Not Interesting
112400	g453	sp|P21213|HUTH_RAT	-0.440155	-0.382854	Not Interesting
112403	g453	sp|P21213|HUTH_RAT	-1.33432	-0.77423	Not Interesting
112413	g455	sp|P21213|HUTH_RAT	-0.846448	-0.34264	Not Interesting
112421	g15133	sp|Q6MG82|PRRT1_RAT	1.50181	2.00002	Not Interesting
112422	g15133	sp|Q6MG82|PRRT1_RAT	0.302872	1.57661	Not Interesting
112453	g15140	NA	0.61427	1.41393	Not Interesting
112458	g15141	sp|A4IG66|TM201_DANRE	-0.401449	-0.601745	Not Interesting
112484	g15148	sp|Q5R501|OST48_PONAB	1.28541	1.14536	Not Interesting
112485	g15148	sp|Q5R501|OST48_PONAB	0.637903	0.692971	Not Interesting
112569	g15176	NA	1.10754	1.04289	Not Interesting
11259	g29767	sp|P29288|PPA5_RAT	0.915349	0.473291	Not Interesting
112611	g11408	sp|Q9Z254|GIPC1_RAT	-0.361386	-0.55708	Not Interesting
112614	g11408	sp|Q9Z254|GIPC1_RAT	-1.1432	-1.08737	Not Interesting
112648	g10856	NA	-0.402923	-0.598244	Not Interesting
112655	g10863	NA	-0.989256	-1.50125	Not Interesting
1127	g13520	NA	0.716033	0.518934	Not Interesting
112709	g9709	NA	0.508209	0.842649	Not Interesting
112713	g9711	sp|Q7SZ56|TM218_DANRE	0.862368	0.609398	Not Interesting
112747	g9721	NA	-0.776621	-1.25348	Not Interesting
112748	g9722	NA	-0.849663	-0.479118	Not Interesting
112758	g9723	NA	-0.422702	-0.699374	Not Interesting
112864	g18506	NA	0.40326	0.641015	Not Interesting
112908	g21233	sp|Q9NPA2|MMP25_HUMAN	-0.397558	-0.974725	Not Interesting
112922	g21235	sp|Q94BZ1|ZIFL1_ARATH	0.729774	0.878899	Not Interesting
112937	g21238	sp|Q9P2K1|C2D2A_HUMAN	-1.21271	-1.25823	Not Interesting
112953	g21238	sp|Q9P2K1|C2D2A_HUMAN	-0.229349	-0.680959	Not Interesting
11297	g26728	NA	-0.432222	-0.677419	Not Interesting
112974	g21241	sp|Q9D8P7|TF3C6_MOUSE	-0.537162	-1.1418	Not Interesting
113006	g22817	sp|Q5HY64|FA47C_HUMAN	0.795431	0.785762	Not Interesting
113051	g28522	NA	-0.745181	-1.45191	Not Interesting
113091	g5911	sp|P47810|WEE1_MOUSE	-1.18293	-1.59315	Not Interesting
113121	g5918	sp|Q5R6J0|ECM29_PONAB	0.43103	1.00566	Not Interesting
113161	g5926	sp|P10076|ZFP26_MOUSE	-0.926209	-1.1191	Not Interesting
113162	g5926	sp|P10076|ZFP26_MOUSE	-1.12709	-1.51811	Not Interesting
113176	g5932	sp|P49137|MAPK2_HUMAN	0.73661	1.05645	Not Interesting
113178	g5932	sp|P49137|MAPK2_HUMAN	0.728034	0.33992	Not Interesting
113185	g5933	sp|P17276|PH4H_DROME	0.558143	1.33811	Not Interesting
113188	g5933	sp|P17276|PH4H_DROME	0.718967	1.08198	Not Interesting
113194	g5935	NA	0.191679	0.803669	Not Interesting
113199	g5940	sp|Q9D1P2|KAT8_MOUSE	0.175099	1.07691	Not Interesting
113238	g15373	NA	0.318642	1.04818	Not Interesting
113272	g15379	NA	0.862487	0.530551	Not Interesting
113284	g15382	sp|Q6ZSS7|MFSD6_HUMAN	0.75588	0.583087	Not Interesting
113303	g15387	sp|Q566X8|DMX1B_DANRE	1.05619	0.802783	Not Interesting
11335	g9840	sp|P15989|CO6A3_CHICK	0.309198	0.649602	Not Interesting
11336	g9841	sp|Q60539|TCF15_MESAU	-0.46639	-0.733437	Not Interesting
11338	g9841	sp|Q60539|TCF15_MESAU	1.00925	0.982804	Not Interesting
113401	g29654	sp|Q28C55|DLG1_XENTR	-0.807744	-1.26713	Not Interesting
113416	g29660	sp|Q9D0B5|TSTD3_MOUSE	0.510743	0.651873	Not Interesting
113417	g29660	sp|Q9D0B5|TSTD3_MOUSE	0.865604	0.799083	Not Interesting
113428	g29660	sp|Q9D0B5|TSTD3_MOUSE	0.546112	0.658296	Not Interesting
11344	g9842	NA	-0.679898	-0.321669	Not Interesting
113442	g29664	NA	1.02042	0.872119	Not Interesting
113519	g19476	NA	-0.528718	-0.659469	Not Interesting
113533	g19480	sp|Q9VAS7|INX3_DROME	-1.45543	-1.62024	Not Interesting
113563	g19495	NA	0.946656	0.866386	Not Interesting
11357	g9847	sp|Q96L93|KI16B_HUMAN	1.07189	0.880273	Not Interesting
113609	g19503	sp|O35491|CLK2_MOUSE	1.00762	0.872814	Not Interesting
113638	g19513	sp|Q8WQI5|RS8_SPOFR	-0.235192	-0.491244	Not Interesting
113667	g19522	NA	-0.643633	-1.03255	Not Interesting
11370	g9854	sp|Q8CFK2|TF3B_MOUSE	0.448509	0.571721	Not Interesting
11372	g9857	sp|P39795|TREC_BACSU	0.868053	1.86359	Not Interesting
113747	g24024	sp|Q91X58|ZFN2B_MOUSE	2.7704	2.95898	Not Interesting
113763	g24032	NA	1.37041	0.45587	Not Interesting
113775	g24036	NA	0.769009	1.45668	Not Interesting
113776	g24036	NA	1.49516	2.40675	Not Interesting
113777	g24036	NA	2.40216	2.8172	Not Interesting
113778	g24036	NA	2.09096	2.89711	Not Interesting
113782	g24037	NA	2.36879	2.82127	Not Interesting
113784	g24037	NA	1.53435	2.1185	Not Interesting
113786	g24037	NA	0.164403	0.909007	Not Interesting
113791	g24037	NA	-0.802762	-0.698762	Not Interesting
113803	g24040	sp|P41105|RL28_MOUSE	0.637055	0.474252	Not Interesting
113812	g24043	NA	-1.2444	-1.29273	Not Interesting
11382	g9860	NA	-0.37991	-0.678017	Not Interesting
113855	g217	sp|Q94900|GLUCL_DROME	0.899408	0.824406	Not Interesting
113877	g224	NA	-0.81134	-0.445472	Not Interesting
113915	g24534	sp|Q1PSW8|LIN41_MOUSE	0.946784	0.870301	Not Interesting
113932	g24534	sp|Q1PSW8|LIN41_MOUSE	-0.445734	-0.85836	Not Interesting
113935	g24534	sp|Q1PSW8|LIN41_MOUSE	-0.338661	-0.626286	Not Interesting
113939	g24534	sp|Q1PSW8|LIN41_MOUSE	0.971455	1.25192	Not Interesting
113954	g24542	sp|Q95KH6|RGF1C_MACFA	-0.430308	-0.508373	Not Interesting
113955	g24542	sp|Q95KH6|RGF1C_MACFA	-1.1726	-1.44961	Not Interesting
113956	g24542	sp|Q95KH6|RGF1C_MACFA	-0.25465	-0.578725	Not Interesting
11396	g9871	sp|Q6P2K6|P4R3A_MOUSE	0.443687	0.593256	Not Interesting
113962	g24543	NA	1.40378	1.14909	Not Interesting
113965	g24544	NA	0.635752	1.12816	Not Interesting
113977	g24548	sp|Q6Q4H1|JMJD6_HYDVU	0.28882	0.60789	Not Interesting
113996	g9519	sp|Q804Q5|FEZF2_DANRE	0.794656	0.669599	Not Interesting
1140	g13528	sp|P41935|HM10_CAEEL	-0.788421	-1.14635	Not Interesting
114014	g9521	sp|Q4V9P6|ADAL_DANRE	0.672145	0.828316	Not Interesting
114019	g9523	sp|O75132|ZBED4_HUMAN	0.291687	1.17414	Not Interesting
114023	g9524	sp|Q5RC84|HEXA_PONAB	0.701374	1.58961	Not Interesting
114025	g9524	sp|Q5RC84|HEXA_PONAB	1.0035	1.39307	Not Interesting
114059	g9540	sp|P68252|1433G_BOVIN	0.31355	0.484021	Not Interesting
114070	g9542	sp|Q6GL75|DCC1_XENTR	-0.493743	-0.736925	Not Interesting
114071	g9542	sp|Q6GL75|DCC1_XENTR	-0.298643	-0.661262	Not Interesting
114072	g9543	sp|O55164|MPDZ_RAT	-0.455545	-0.376441	Not Interesting
114073	g9543	sp|O55164|MPDZ_RAT	-0.72015	-1.18763	Not Interesting
114081	g9549	NA	1.05241	0.563923	Not Interesting
114092	g9551	sp|P38978|KS1_HYDVU	-0.763531	-0.884851	Not Interesting
11411	g9879	sp|Q95NT6|MTH2_DROYA	-0.926187	-1.09396	Not Interesting
114126	g2558	NA	0.321628	1.28128	Not Interesting
114137	g27076	sp|Q8N5D0|WDTC1_HUMAN	-0.32665	-0.761296	Not Interesting
114175	g27080	sp|Q8BGK5|S35F1_MOUSE	-0.605506	-0.824713	Not Interesting
114206	g27085	NA	0.723065	0.472745	Not Interesting
11421	g9881	sp|Q9NVS2|RT18A_HUMAN	-1.03363	-1.89387	Not Interesting
114266	g27101	NA	0.443862	0.804384	Not Interesting
114297	g27119	NA	-0.734094	-0.853095	Not Interesting
114316	g32682	NA	-0.875529	-0.837876	Not Interesting
114327	g32685	sp|Q9BYN7|ZN341_HUMAN	0.700199	0.0404614	Not Interesting
11433	g9882	NA	-1.52435	-1.26887	Not Interesting
114354	g32698	sp|P97807|FUMH_MOUSE	0.762699	1.39252	Not Interesting
11437	g9882	NA	-0.578437	-1.01046	Not Interesting
114396	g32707	sp|Q9NQC3|RTN4_HUMAN	-0.453039	-0.814249	Not Interesting
1144	g13529	NA	0.703922	1.00835	Not Interesting
114438	g32726	sp|Q56X76|RH39_ARATH	0.374897	1.07421	Not Interesting
114461	g18777	NA	0.622961	0.467237	Not Interesting
114462	g18777	NA	0.525065	0.959377	Not Interesting
114471	g18779	sp|Q61041|NPY4R_MOUSE	-1.2199	-1.96148	Not Interesting
114473	g18779	sp|Q61041|NPY4R_MOUSE	-0.768432	-0.884956	Not Interesting
114535	g26548	NA	-0.68833	-0.459048	Not Interesting
114543	g26549	NA	-0.488301	-0.646995	Not Interesting
114562	g11924	sp|Q60525|WAP53_MESAU	1.0113	0.83251	Not Interesting
114565	g11925	sp|Q9BUZ4|TRAF4_HUMAN	0.379224	0.559802	Not Interesting
114574	g11925	sp|Q9BUZ4|TRAF4_HUMAN	-0.560079	-0.916979	Not Interesting
114577	g11928	sp|A4FUD3|U5S1_BOVIN	0.259528	0.602915	Not Interesting
114613	g11946	NA	-0.355586	-0.94417	Not Interesting
114617	g11950	sp|Q8CFH6|SIK2_MOUSE	1.5696	1.25612	Not Interesting
114620	g11950	sp|Q8CFH6|SIK2_MOUSE	1.13864	1.34368	Not Interesting
114645	g11956	sp|Q5THJ4|VP13D_HUMAN	0.623022	0.506142	Not Interesting
114672	g11965	sp|O55005|ROBO1_RAT	1.68385	1.74197	Not Interesting
114679	g11969	sp|D3YXG0|HMCN1_MOUSE	0.92035	1.12224	Not Interesting
114680	g11969	sp|D3YXG0|HMCN1_MOUSE	-0.243913	-0.712903	Not Interesting
114703	g11977	NA	-0.561401	-0.481851	Not Interesting
114705	g11977	NA	-0.488939	-0.649766	Not Interesting
114707	g11978	sp|Q5EA92|AL14E_BOVIN	-1.05381	-0.786949	Not Interesting
114715	g11980	NA	-0.609315	-0.401248	Not Interesting
114718	g11980	NA	-0.618565	-0.674423	Not Interesting
114720	g11981	sp|Q9NYG2|ZDHC3_HUMAN	-0.473477	-0.567705	Not Interesting
114740	g11989	NA	0.870398	0.624105	Not Interesting
114755	g11994	NA	2.92553	3.37818	Not Interesting
114767	g11996	sp|A5PN43|TM175_DANRE	1.65944	2.02453	Not Interesting
114768	g11996	sp|A5PN43|TM175_DANRE	2.58579	3.63935	Not Interesting
114785	g12000	sp|Q9CXY1|TM175_MOUSE	-0.47088	-0.507965	Not Interesting
114815	g12014	NA	-0.782877	-1.58038	Not Interesting
114823	g12018	NA	1.27847	0.781082	Not Interesting
11486	g26528	sp|Q5RFU0|SIAE_PONAB	0.486519	0.982779	Not Interesting
114868	g23727	NA	1.39182	1.70355	Not Interesting
114887	g23730	sp|Q28735|TMEDA_RABIT	0.892827	0.332128	Not Interesting
114890	g23731	NA	0.473732	0.216638	Not Interesting
114906	g23733	NA	0.65162	0.398398	Not Interesting
114922	g23740	NA	-0.131815	-1.0879	Not Interesting
114980	g23753	sp|Q9LMN8|WAK3_ARATH	1.29607	0.896253	Not Interesting
114998	g15308	sp|P02699|OPSD_BOVIN	-0.349933	-0.746108	Not Interesting
115006	g15312	NA	-0.136891	-0.48863	Not Interesting
115053	g28082	sp|Q8N584|TT39C_HUMAN	0.722872	1.22842	Not Interesting
115062	g28082	sp|Q8N584|TT39C_HUMAN	0.710518	0.698941	Not Interesting
115065	g28083	sp|Q6DN14|MCTP1_HUMAN	0.82267	0.802783	Not Interesting
115077	g28084	sp|Q6DN12|MCTP2_HUMAN	-1.58408	-1.61556	Not Interesting
115094	g9	NA	-0.353033	-0.743969	Not Interesting
115114	g10	NA	-1.12879	-1.03656	Not Interesting
115173	g19	sp|P25455|PIP1_DROME	-0.739123	-1.1821	Not Interesting
115293	g7262	sp|P35224|CTNB_URECA	1.36688	0.997508	Not Interesting
115301	g7263	sp|O08760|OGG1_MOUSE	0.140085	0.940085	Not Interesting
115303	g7263	sp|O08760|OGG1_MOUSE	-0.317896	-0.924831	Not Interesting
115320	g7267	sp|Q96MU8|KREM1_HUMAN	0.294007	0.888683	Not Interesting
115342	g7273	sp|P16425|Y2R2_DROME	0.488197	1.46441	Not Interesting
115351	g7278	sp|Q9D1G5|LRC57_MOUSE	1.104	0.825237	Not Interesting
115374	g21590	sp|Q5ZMP6|AP2M1_CHICK	0.619068	1.30545	Not Interesting
115395	g21593	NA	0.285426	0.60665	Not Interesting
115421	g21601	NA	0.618425	0.396368	Not Interesting
115445	g21606	sp|B4PPK2|FOSL_DROYA	0.722476	0.350859	Not Interesting
115446	g21607	sp|Q96AT9|RPE_HUMAN	0.909517	0.908476	Not Interesting
115461	g21611	NA	0.139315	0.658363	Not Interesting
115471	g21613	sp|Q4QQV8|CHMP5_RAT	1.86749	1.70869	Not Interesting
115472	g21613	sp|Q4QQV8|CHMP5_RAT	2.62777	1.93633	Not Interesting
115500	g21535	NA	0.711763	0.83949	Not Interesting
115521	g2681	NA	-0.958958	-0.714357	Not Interesting
115532	g2688	sp|P35317|AT1A_HYDVU	1.65561	0.800765	Not Interesting
115562	g2699	sp|P35317|AT1A_HYDVU	-0.714486	-0.637239	Not Interesting
115591	g2705	sp|Q7Z494|NPHP3_HUMAN	0.144215	0.820323	Not Interesting
11561	g7342	sp|O75467|Z324A_HUMAN	1.55867	1.14799	Not Interesting
115613	g2707	NA	-0.403711	-1.0116	Not Interesting
115623	g2714	NA	-0.632697	-0.625268	Not Interesting
115637	g2716	NA	1.19725	0.746901	Not Interesting
115646	g2717	sp|Q05438|BMR1B_CHICK	0.830115	0.554611	Not Interesting
115654	g2717	sp|Q05438|BMR1B_CHICK	-0.716711	-0.00220845	Not Interesting
115661	g2718	sp|Q9QZ67|PPM1D_MOUSE	-0.473719	-0.815725	Not Interesting
11572	g7343	sp|Q60631|GRB2_MOUSE	1.02527	1.0751	Not Interesting
115726	g6929	NA	-0.853854	-1.32399	Not Interesting
11575	g7344	NA	0.647225	1.0416	Not Interesting
11576	g7344	NA	0.766952	1.05808	Not Interesting
11580	g7349	NA	1.1281	1.44722	Not Interesting
11581	g7349	NA	2.72364	3.15421	Not Interesting
115815	g17934	sp|Q94511|NDUS1_DROME	0.65021	1.10536	Not Interesting
115844	g17940	sp|Q24799|MYPH_ECHGR	0.401542	0.588258	Not Interesting
115851	g24282	NA	-0.685257	-0.65685	Not Interesting
115869	NA	NA	1.07991	0.600605	Not Interesting
115873	g8441	NA	0.653061	0.833239	Not Interesting
115888	g8382	NA	-0.488549	-0.66507	Not Interesting
115892	g13394	NA	0.643455	0.927415	Not Interesting
115930	g13406	sp|Q75N73|S39AE_MOUSE	-1.08024	-0.443075	Not Interesting
115941	g13406	sp|Q75N73|S39AE_MOUSE	-0.829219	-1.28169	Not Interesting
115942	g13406	sp|Q75N73|S39AE_MOUSE	-0.664561	-0.749891	Not Interesting
115946	g13406	sp|Q75N73|S39AE_MOUSE	-0.241667	-0.522501	Not Interesting
11606	g7353	NA	-1.25357	-0.983639	Not Interesting
11608	g7354	NA	0.669476	0.654453	Not Interesting
11653	g7374	sp|F1MBP6|KLHL3_BOVIN	-0.572104	-0.77253	Not Interesting
1166	g26315	NA	0.387769	0.940434	Not Interesting
11667	g7377	NA	-0.585536	-0.798233	Not Interesting
11678	g7378	sp|Q9GR88|ERF1_POLMI	-0.757993	-0.745406	Not Interesting
11683	g7379	sp|Q7TMF2|ERI1_MOUSE	0.543369	1.31182	Not Interesting
11731	g20052	sp|Q6PAX2|ATD3B_XENLA	1.27687	0.836462	Not Interesting
11736	g20054	NA	-0.643825	-0.975567	Not Interesting
11772	g17377	NA	0.935807	0.464193	Not Interesting
11773	g17379	sp|Q63035|NLRP6_RAT	0.904119	0.976898	Not Interesting
11837	g17396	NA	-0.469859	-0.517209	Not Interesting
11879	g12322	sp|P40240|CD9_MOUSE	0.602592	0.75847	Not Interesting
11884	g12322	sp|P40240|CD9_MOUSE	0.631846	1.1345	Not Interesting
11896	g12323	NA	1.56167	1.4296	Not Interesting
11898	g12323	NA	0.981971	0.311259	Not Interesting
11942	g12342	sp|Q6TLI9|DRD2_MUSPF	-0.275611	-0.706938	Not Interesting
11948	g12342	sp|Q6TLI9|DRD2_MUSPF	2.20265	2.9306	Not Interesting
11949	g12342	sp|Q6TLI9|DRD2_MUSPF	2.12358	2.98674	Not Interesting
11951	g12342	sp|Q6TLI9|DRD2_MUSPF	0.559819	0.890352	Not Interesting
11972	g12355	NA	-0.782491	-0.839738	Not Interesting
11973	g12355	NA	-0.925867	-1.1781	Not Interesting
11974	g12355	NA	-0.579473	-0.678176	Not Interesting
11982	g12355	NA	-1.44341	-0.902587	Not Interesting
12024	g12366	NA	-0.263134	-0.690049	Not Interesting
12048	g12368	sp|P16389|KCNA2_HUMAN	0.542965	0.750568	Not Interesting
12104	g6256	NA	0.662845	0.498601	Not Interesting
12109	g6259	NA	-0.772338	-0.485519	Not Interesting
12148	g21478	NA	-0.51811	-0.246254	Not Interesting
12151	g21479	sp|A1ZAX0|CCH1R_DROME	-0.764516	-0.205515	Not Interesting
12161	g21479	sp|A1ZAX0|CCH1R_DROME	-0.49173	-0.401226	Not Interesting
12188	g21488	sp|O57422|OPN4B_XENLA	-1.36982	-0.749248	Not Interesting
12191	g21488	sp|O57422|OPN4B_XENLA	0.508155	0.677443	Not Interesting
12192	g21488	sp|O57422|OPN4B_XENLA	-1.63836	-1.24223	Not Interesting
12210	g21491	sp|P30974|TLR1_DROME	-0.715719	-0.570213	Not Interesting
12211	g21492	sp|P08116|PVA_PLAFA	-1.34742	-1.50221	Not Interesting
12213	g21492	sp|P08116|PVA_PLAFA	-1.08087	-0.303319	Not Interesting
12214	g21492	sp|P08116|PVA_PLAFA	-0.62964	0.046573	Not Interesting
12216	g21492	sp|P08116|PVA_PLAFA	-1.61073	-0.376849	Not Interesting
12218	g21493	sp|P35072|TCB1_CAEBR	-0.509786	-0.159624	Not Interesting
1224	g28853	NA	0.87786	0.80664	Not Interesting
12240	g21508	NA	-0.704663	-0.96687	Not Interesting
12247	g21508	NA	1.02976	1.60062	Not Interesting
12261	g19700	NA	-0.800747	-0.886015	Not Interesting
12263	g19700	NA	2.90895	2.31623	Not Interesting
12318	g15446	sp|Q0VC80|YRDC_BOVIN	0.803868	0.784518	Not Interesting
12335	g15451	sp|P47799|FSHR_HORSE	1.65283	1.7073	Not Interesting
12336	g15451	sp|P47799|FSHR_HORSE	1.49528	1.02844	Not Interesting
12482	g19999	NA	-1.08209	-1.36595	Not Interesting
12519	g5658	sp|Q8C6K9|CO6A6_MOUSE	-0.884611	-1.23066	Not Interesting
12521	g5658	sp|Q8C6K9|CO6A6_MOUSE	-0.901375	-0.493383	Not Interesting
1256	g12686	NA	-0.925088	-0.796547	Not Interesting
12564	g33319	sp|D3YXG0|HMCN1_MOUSE	-0.554694	-0.966877	Not Interesting
1264	g12687	NA	1.32164	1.63874	Not Interesting
12649	g23029	sp|Q5F2F2|ABH15_MOUSE	0.576294	0.774161	Not Interesting
12650	g23029	sp|Q5F2F2|ABH15_MOUSE	0.281744	0.708902	Not Interesting
12678	g22580	NA	-1.07303	-1.11205	Not Interesting
12680	g22580	NA	-0.522765	-1.02801	Not Interesting
12694	g22585	sp|Q91Z46|DUS7_MOUSE	2.37261	1.79987	Not Interesting
127	g18886	NA	1.39212	1.04294	Not Interesting
12755	g29231	sp|P26638|SYSC_MOUSE	0.902067	1.01099	Not Interesting
12756	g29231	sp|P26638|SYSC_MOUSE	0.977814	1.19977	Not Interesting
12764	g29232	NA	-0.401092	-0.600808	Not Interesting
12766	g29234	sp|Q28E95|SH3R1_XENTR	-0.267155	-0.42762	Not Interesting
12768	g29234	sp|Q28E95|SH3R1_XENTR	-0.512904	-0.903397	Not Interesting
12814	g29256	sp|B9DFR3|PAE9_ARATH	-0.688182	-1.00166	Not Interesting
12816	g29257	sp|Q8SQ72|SGCG_CANLF	-0.357011	-0.531517	Not Interesting
12830	g29260	sp|Q6PG95|CRML_MOUSE	0.482633	0.984139	Not Interesting
12836	g29261	NA	-0.258523	-0.443365	Not Interesting
12850	g29264	sp|Q14185|DOCK1_HUMAN	-0.867206	-0.933383	Not Interesting
12855	g29265	sp|Q9DGG6|ADCY9_CHICK	-0.186047	-0.477002	Not Interesting
12862	g29266	sp|P51830|ADCY9_MOUSE	1.10883	0.954934	Not Interesting
12864	g29266	sp|P51830|ADCY9_MOUSE	-0.725796	-0.853752	Not Interesting
12867	g29267	NA	1.0893	1.41892	Not Interesting
12868	g29267	NA	0.892229	1.00334	Not Interesting
12888	g29272	sp|P16395|ACM1_DROME	-0.669231	-0.705305	Not Interesting
12906	g29283	NA	-0.76546	-0.46593	Not Interesting
12907	g29284	sp|Q9NBX4|RTXE_DROME	-1.15157	-1.25903	Not Interesting
12918	g29287	NA	-0.970862	-1.02781	Not Interesting
12924	g29288	NA	-1.28095	-1.07445	Not Interesting
12925	g29288	NA	-0.453281	-0.647643	Not Interesting
12927	g29289	NA	0.949922	0.638895	Not Interesting
12975	g29299	sp|Q9D0F3|LMAN1_MOUSE	0.696443	0.940903	Not Interesting
12983	g29300	NA	0.792052	0.600928	Not Interesting
13005	g29308	sp|Q4L235|ACSF4_HUMAN	0.639714	1.38203	Not Interesting
13007	g29308	sp|Q4L235|ACSF4_HUMAN	-0.398479	-0.29219	Not Interesting
13018	g29309	sp|Q8TB61|S35B2_HUMAN	-0.0160893	0.663978	Not Interesting
13065	g29319	sp|O15118|NPC1_HUMAN	0.790249	0.983015	Not Interesting
13067	g29319	sp|O15118|NPC1_HUMAN	0.638671	1.49354	Not Interesting
13082	g29325	sp|P56941|NPC1_PIG	0.711071	1.01501	Not Interesting
13083	g29325	sp|P56941|NPC1_PIG	1.56427	1.62149	Not Interesting
13088	g29327	sp|Q96AJ9|VTI1A_HUMAN	1.22504	1.17711	Not Interesting
13090	g29327	sp|Q96AJ9|VTI1A_HUMAN	1.07576	0.642784	Not Interesting
13091	g29328	NA	0.985797	0.65051	Not Interesting
13104	g29331	NA	-0.600533	-0.63126	Not Interesting
13112	g29332	sp|O15974|OPSD2_MIZYE	-0.972607	-1.18873	Not Interesting
13155	g1349	sp|Q9BY15|AGRE3_HUMAN	-0.536478	-0.818484	Not Interesting
13168	g1351	NA	-0.78735	-0.939359	Not Interesting
13184	g1355	NA	1.02625	0.442644	Not Interesting
1320	g12703	sp|Q02290|XYNB_NEOPA	0.157376	0.92719	Not Interesting
13204	g1359	NA	1.73823	1.56542	Not Interesting
13207	g1360	NA	1.3945	1.33732	Not Interesting
13212	g1360	NA	0.863416	1.11848	Not Interesting
13214	g1360	NA	0.914932	0.624462	Not Interesting
13244	g1512	sp|P08770|TRA1_MAIZE	1.29496	1.23808	Not Interesting
13269	g30694	NA	-0.42796	-1.13249	Not Interesting
13276	g30695	NA	0.990092	1.70966	Not Interesting
13283	g30699	sp|P16425|Y2R2_DROME	0.565524	0.801928	Not Interesting
13285	g30700	sp|Q9BY84|DUS16_HUMAN	1.75244	1.10857	Not Interesting
13292	g30702	sp|Q4R3M6|NDUS5_MACFA	-0.810424	-0.930326	Not Interesting
13339	g30707	sp|P20072|ANXA7_BOVIN	3.01591	2.66589	Not Interesting
13374	g30723	NA	0.526749	0.624848	Not Interesting
13376	g30722	sp|D1MGU1|SLB_PROJR	0.163851	0.72375	Not Interesting
13379	g30722	sp|D1MGU1|SLB_PROJR	-0.681727	-0.448515	Not Interesting
13388	g30724	NA	0.711732	0.55434	Not Interesting
13389	g30724	NA	-0.652194	-0.756641	Not Interesting
134	g18887	NA	-1.23564	-1.365	Not Interesting
1340	g23827	sp|P70191|TRAF5_MOUSE	-0.551571	-0.655171	Not Interesting
13420	g30736	NA	-0.434497	-0.851796	Not Interesting
13450	g15769	NA	0.00239955	-0.462646	Not Interesting
13487	g13307	sp|P41252|SYIC_HUMAN	0.852685	0.730214	Not Interesting
13491	g13307	sp|P41252|SYIC_HUMAN	1.60641	1.5997	Not Interesting
13492	g13307	sp|P41252|SYIC_HUMAN	1.55946	1.42853	Not Interesting
13495	g13308	sp|P41252|SYIC_HUMAN	1.50389	1.91453	Not Interesting
13497	g13309	sp|P41252|SYIC_HUMAN	1.98576	1.67299	Not Interesting
13499	g13309	sp|P41252|SYIC_HUMAN	2.48452	1.93418	Not Interesting
13585	g29344	sp|Q00341|VIGLN_HUMAN	1.19391	0.722823	Not Interesting
13591	g29344	sp|Q00341|VIGLN_HUMAN	0.87552	1.01997	Not Interesting
13595	g29345	sp|P57729|RAB38_HUMAN	-0.378361	-1.20977	Not Interesting
1366	g23833	sp|Q640L2|SPX3_XENLA	-0.600145	-0.753542	Not Interesting
13679	g32930	sp|Q2U7A3|ACT_ASPOR	-0.795249	-1.02613	Not Interesting
1368	g23833	sp|Q640L2|SPX3_XENLA	-0.687031	-0.872134	Not Interesting
13680	g32930	sp|Q2U7A3|ACT_ASPOR	-0.985422	-1.75456	Not Interesting
13683	g32930	sp|Q2U7A3|ACT_ASPOR	-1.05569	-1.10341	Not Interesting
13684	g32930	sp|Q2U7A3|ACT_ASPOR	-0.587384	-0.54911	Not Interesting
13718	g32943	NA	0.798926	0.446639	Not Interesting
13728	g32944	sp|Q8WXX0|DYH7_HUMAN	-0.514293	-0.797427	Not Interesting
13814	NA	NA	0.609157	0.83559	Not Interesting
13836	g8191	NA	-0.2576	-0.490858	Not Interesting
1386	g23834	sp|Q640L2|SPX3_XENLA	-0.870219	-0.844425	Not Interesting
1388	g23834	sp|Q640L2|SPX3_XENLA	-1.28026	-1.27375	Not Interesting
13968	g6414	sp|A6NHR9|SMHD1_HUMAN	-0.74612	-0.87447	Not Interesting
13969	g6415	sp|Q11075|YWV1_CAEEL	-0.896365	-0.845832	Not Interesting
13986	g6417	sp|Q9CZR2|NALD2_MOUSE	-0.247121	-0.512035	Not Interesting
14063	g9809	sp|Q53FV1|ORML2_HUMAN	1.52217	1.19402	Not Interesting
14064	g9810	NA	2.59131	2.32931	Not Interesting
14067	g9811	sp|A2AJ76|HMCN2_MOUSE	2.00621	1.584	Not Interesting
14068	g9811	sp|A2AJ76|HMCN2_MOUSE	2.3034	2.24367	Not Interesting
14073	g9811	sp|A2AJ76|HMCN2_MOUSE	0.99441	1.20147	Not Interesting
14076	g9811	sp|A2AJ76|HMCN2_MOUSE	0.918188	0.371597	Not Interesting
14092	g9814	NA	-0.940986	-0.945189	Not Interesting
14106	g9815	sp|P0C1Q2|PDE11_MOUSE	-0.780465	-0.690055	Not Interesting
14107	g9815	sp|P0C1Q2|PDE11_MOUSE	-0.765614	-0.836571	Not Interesting
14125	g9817	NA	0.749804	0.51207	Not Interesting
14133	g9819	sp|P86179|CSL3_ONCKE	2.29543	2.53641	Not Interesting
14135	g9820	NA	1.30872	1.75186	Not Interesting
14152	g9822	sp|P22897|MRC1_HUMAN	0.581094	0.626667	Not Interesting
14175	g9824	NA	0.646648	0.501103	Not Interesting
14194	g9830	NA	-0.47651	-0.630896	Not Interesting
14223	g9835	sp|Q9I8S4|AZIN2_XENLA	-0.803716	-1.39745	Not Interesting
14250	g29098	NA	-0.592599	-0.666812	Not Interesting
14297	g27904	NA	0.550281	0.769433	Not Interesting
14298	g27905	sp|P46531|NOTC1_HUMAN	-0.594758	-0.622448	Not Interesting
14301	g27905	sp|P46531|NOTC1_HUMAN	-0.409796	-0.788937	Not Interesting
14309	g27911	sp|Q95SX7|RTBS_DROME	-0.635969	-0.893687	Not Interesting
14318	g19216	sp|Q6GQB9|EDEM3_XENLA	0.998655	1.62605	Not Interesting
14322	g19216	sp|Q6GQB9|EDEM3_XENLA	0.646179	1.42948	Not Interesting
14323	g19216	sp|Q6GQB9|EDEM3_XENLA	0.346496	1.25355	Not Interesting
14325	g19216	sp|Q6GQB9|EDEM3_XENLA	1.00167	1.18886	Not Interesting
1434	g11048	sp|Q64077|NK2R_CAVPO	1.4251	1.71124	Not Interesting
14349	g19218	NA	-0.710124	-1.054	Not Interesting
14371	g19221	NA	-0.768059	-1.43564	Not Interesting
14372	g19221	NA	-0.449361	-0.695862	Not Interesting
14373	g19221	NA	-0.560503	-0.743286	Not Interesting
14381	g19222	NA	-0.77366	-0.349318	Not Interesting
14389	g19222	NA	-1.59811	-1.16912	Not Interesting
14391	g19222	NA	-0.683323	-0.91761	Not Interesting
14397	g19223	NA	-0.903167	-1.04168	Not Interesting
14412	g19230	sp|Q9EQX4|AIF1L_MOUSE	1.34227	0.87691	Not Interesting
14417	g19231	sp|P20711|DDC_HUMAN	-0.68713	-0.980559	Not Interesting
14418	g19231	sp|P20711|DDC_HUMAN	-1.01781	-1.66727	Not Interesting
1443	g11049	sp|P35072|TCB1_CAEBR	-0.934874	-0.679401	Not Interesting
14438	g19232	NA	-0.563093	-0.776553	Not Interesting
1444	g11049	sp|P35072|TCB1_CAEBR	-1.50357	-0.160231	Not Interesting
14443	g19235	sp|O94818|NOL4_HUMAN	1.44175	1.11775	Not Interesting
14451	g19235	sp|O94818|NOL4_HUMAN	0.822063	0.789948	Not Interesting
145	g18894	sp|Q2KIK0|SGT1_BOVIN	-0.253666	-0.683909	Not Interesting
14525	g9693	sp|P18503|CAS4_EPHMU	-0.664385	-0.202231	Not Interesting
14530	g9693	sp|P18503|CAS4_EPHMU	1.43426	1.13313	Not Interesting
14537	g9694	sp|Q6I6M7|FGF1_CYNPY	1.16305	0.949044	Not Interesting
14539	g9694	sp|Q6I6M7|FGF1_CYNPY	1.13647	0.348015	Not Interesting
14540	g9694	sp|Q6I6M7|FGF1_CYNPY	0.681083	0.789729	Not Interesting
14542	g9694	sp|Q6I6M7|FGF1_CYNPY	-0.836057	-0.783838	Not Interesting
1455	g11054	NA	-0.710042	-1.14088	Not Interesting
14563	g30675	sp|Q8BGC4|PTGR3_MOUSE	0.653147	0.631181	Not Interesting
14572	g30677	sp|P91645|CAC1A_DROME	1.05388	1.57097	Not Interesting
1465	g11056	NA	0.614876	0.860097	Not Interesting
14655	g19983	NA	0.972196	1.60363	Not Interesting
1466	g11056	NA	0.860826	1.05611	Not Interesting
14662	g19984	sp|Q02225|SKI_XENLA	-1.14244	-1.10828	Not Interesting
14664	g19984	sp|Q02225|SKI_XENLA	-1.10524	-0.0166553	Not Interesting
14665	g19984	sp|Q02225|SKI_XENLA	-0.879311	-1.10721	Not Interesting
14666	g19984	sp|Q02225|SKI_XENLA	-0.538631	-0.122104	Not Interesting
14667	g19984	sp|Q02225|SKI_XENLA	-0.464581	-0.107946	Not Interesting
14736	g22625	NA	-0.47261	-0.808548	Not Interesting
14756	g22632	NA	0.613282	0.78227	Not Interesting
14769	g22636	NA	0.964061	1.08794	Not Interesting
14770	g22636	NA	1.3336	1.32197	Not Interesting
14772	g22636	NA	-0.384054	-0.794608	Not Interesting
14774	g22636	NA	1.36752	1.38906	Not Interesting
14780	g22637	NA	-0.604834	-0.918924	Not Interesting
14784	g22638	NA	-0.178201	-0.597147	Not Interesting
14789	g22639	sp|Q58A42|DD3_DICDI	-0.816684	-1.25091	Not Interesting
14798	g22643	sp|Q58A42|DD3_DICDI	-0.486486	-1.00873	Not Interesting
1480	g11059	sp|Q9BQI7|PSD2_HUMAN	1.24012	0.830209	Not Interesting
14805	g22643	sp|Q58A42|DD3_DICDI	-0.712589	-0.935375	Not Interesting
14826	g22646	sp|P0CH95|PHF8_DANRE	0.561374	1.62155	Not Interesting
14835	g22647	NA	0.596361	0.693011	Not Interesting
14837	g22647	NA	0.885396	1.68816	Not Interesting
14838	g22647	NA	1.01106	0.745037	Not Interesting
1486	g11061	NA	1.08362	0.756616	Not Interesting
14867	g22655	sp|Q63690|BAX_RAT	1.5966	1.16794	Not Interesting
1487	g11061	NA	0.740202	0.689854	Not Interesting
14877	g22657	sp|Q3ZCU0|YK006_HUMAN	-0.233142	-0.494955	Not Interesting
14879	g22657	sp|Q3ZCU0|YK006_HUMAN	-0.640168	-0.739739	Not Interesting
1488	g11061	NA	0.686627	0.866236	Not Interesting
14886	g22659	NA	0.987882	0.496109	Not Interesting
14908	g22663	NA	-0.639257	-0.685289	Not Interesting
14911	g22664	NA	-0.621767	-0.731608	Not Interesting
14913	g22664	NA	-0.962761	-0.457237	Not Interesting
14936	g22671	sp|Q12792|TWF1_HUMAN	-1.32118	-1.61656	Not Interesting
14952	g22674	NA	-0.447991	-0.706285	Not Interesting
14959	g22677	sp|Q8IWV2|CNTN4_HUMAN	-1.51457	-1.24992	Not Interesting
14971	g22677	sp|Q8IWV2|CNTN4_HUMAN	0.509898	0.182879	Not Interesting
14972	g22677	sp|Q8IWV2|CNTN4_HUMAN	-0.667749	-0.683015	Not Interesting
14987	g22679	NA	0.461239	0.849695	Not Interesting
14989	g22680	sp|Q3E6S9|CNIF3_ARATH	-0.516523	-0.854143	Not Interesting
15012	g22688	sp|Q91348|F26L_CHICK	-0.25519	-0.825216	Not Interesting
15037	g22695	NA	0.131406	0.503599	Not Interesting
15039	g22695	NA	-0.510759	-1.00049	Not Interesting
15049	g22705	sp|A7E2Z9|K132L_BOVIN	-0.5468	-0.891152	Not Interesting
15076	g10818	sp|Q7TN88|PK1L2_MOUSE	-0.752884	-1.04344	Not Interesting
15086	g10820	NA	-0.657508	-0.860493	Not Interesting
15107	g25524	sp|Q66GQ5|RWA3_ARATH	-0.373543	-0.393177	Not Interesting
15145	g240	sp|P25325|THTM_HUMAN	0.823664	0.772949	Not Interesting
15162	g244	NA	-1.30265	-1.05108	Not Interesting
15165	g245	sp|A7MB28|NDRG3_BOVIN	1.29639	0.947734	Not Interesting
15182	g248	NA	1.12757	0.771916	Not Interesting
15195	g258	sp|Q24UI6|IF2_DESHY	0.723024	0.398319	Not Interesting
15221	g269	sp|Q9BGT1|TTC9C_MACFA	3.6794	3.28205	Not Interesting
15269	g14067	sp|Q3UYK3|TBCD9_MOUSE	-0.932468	-1.51942	Not Interesting
15272	g14067	sp|Q3UYK3|TBCD9_MOUSE	-0.641518	-1.21007	Not Interesting
15302	g14074	sp|O88799|ZAN_MOUSE	-0.693948	-0.718344	Not Interesting
15306	g14074	sp|O88799|ZAN_MOUSE	-0.531583	-0.970427	Not Interesting
15312	g14075	NA	-0.512839	-0.714238	Not Interesting
15313	g14075	NA	-0.71535	-1.16624	Not Interesting
15335	g14090	NA	0.957319	1.09028	Not Interesting
15352	g14094	NA	-0.141765	-0.598694	Not Interesting
15354	g14095	sp|O95630|STABP_HUMAN	1.2782	1.47356	Not Interesting
15392	g18232	sp|Q9Y2U5|M3K2_HUMAN	0.369568	1.021	Not Interesting
1542	g6614	sp|Q7Z494|NPHP3_HUMAN	1.73715	1.27731	Not Interesting
15424	g9073	sp|C6KSQ6|RAD50_PLAF7	-0.887959	-1.23578	Not Interesting
1545	g6615	NA	-0.460422	-1.0416	Not Interesting
1548	g6615	NA	-0.45377	-0.705009	Not Interesting
15494	g31198	sp|Q8R4T9|UT2_MOUSE	-1.57219	-1.36351	Not Interesting
15496	g31198	sp|Q8R4T9|UT2_MOUSE	-0.527726	-0.997321	Not Interesting
1551	g6616	NA	-0.406539	-1.2717	Not Interesting
15524	g20059	NA	-0.272934	-0.835146	Not Interesting
15543	g20062	sp|P18761|CAH6_MOUSE	-0.550389	-0.82429	Not Interesting
15556	g20063	sp|Q96DM1|PGBD4_HUMAN	-1.49169	-1.00441	Not Interesting
15565	g20071	sp|Q10462|CAH5_CAEEL	-0.75122	-0.791131	Not Interesting
15590	g20079	NA	0.876659	0.908301	Not Interesting
15637	g20089	NA	-0.999726	-0.995464	Not Interesting
1565	g6618	sp|Q5RC90|NCS1_PONAB	-1.14707	-1.64563	Not Interesting
15651	g20096	NA	1.17987	1.3105	Not Interesting
15652	g20096	NA	0.778049	0.898075	Not Interesting
15659	g20096	NA	-0.0310098	-0.7425	Not Interesting
1567	g6619	NA	-0.581331	-0.546234	Not Interesting
1568	g6619	NA	-0.805387	-0.957264	Not Interesting
15691	g20102	NA	-0.776812	-1.13761	Not Interesting
1570	g6619	NA	0.658998	0.420597	Not Interesting
15760	g20113	NA	-0.355923	-0.781231	Not Interesting
15779	g20118	NA	-0.712848	-0.619009	Not Interesting
15788	g20122	sp|Q9QZC4|PCY1B_RAT	0.901195	0.872214	Not Interesting
158	g18911	sp|Q9CQC9|SAR1B_MOUSE	0.665767	0.74716	Not Interesting
15822	g27127	sp|Q8CJ12|AGRG2_MOUSE	-0.769821	-1.17388	Not Interesting
15833	g27128	NA	-1.12285	-1.56044	Not Interesting
15899	g21752	sp|Q02253|MMSA_RAT	0.804596	1.20736	Not Interesting
1592	g6622	sp|A4IF63|TRIM2_BOVIN	-0.474211	-0.808606	Not Interesting
15958	g21761	sp|Q9Y5R5|DMRT2_HUMAN	-0.224595	-1.03929	Not Interesting
15960	g21761	sp|Q9Y5R5|DMRT2_HUMAN	-1.04782	-0.223403	Not Interesting
15962	g21761	sp|Q9Y5R5|DMRT2_HUMAN	-0.482429	-0.825532	Not Interesting
15995	g21775	sp|P08183|MDR1_HUMAN	0.577196	1.11737	Not Interesting
15996	g21775	sp|P08183|MDR1_HUMAN	2.05938	2.03199	Not Interesting
16020	g21782	sp|P13135|CPNS1_BOVIN	0.823903	0.725885	Not Interesting
16042	g21787	NA	0.447405	0.684406	Not Interesting
16049	g21790	sp|P41044|CAB32_DROME	1.27097	0.849929	Not Interesting
16052	g21790	sp|P41044|CAB32_DROME	-0.558173	-0.626611	Not Interesting
16055	g21790	sp|P41044|CAB32_DROME	0.70948	0.27434	Not Interesting
16096	g21805	sp|Q9P2N4|ATS9_HUMAN	0.58523	0.795325	Not Interesting
16100	g21805	sp|Q9P2N4|ATS9_HUMAN	0.891484	0.825708	Not Interesting
16125	g21810	sp|P05455|LA_HUMAN	-0.519932	-0.775096	Not Interesting
16144	g21818	NA	-0.373718	-0.687833	Not Interesting
16184	g22270	sp|Q9JIX8|ACINU_MOUSE	0.532469	1.23701	Not Interesting
16197	g22276	sp|P30664|MCM4B_XENLA	-0.846009	-1.37263	Not Interesting
16212	g22284	NA	-0.269366	-0.970911	Not Interesting
16224	g1009	NA	-0.989032	-1.05279	Not Interesting
16266	g9431	NA	0.592337	1.08867	Not Interesting
16304	g3223	NA	-0.882541	-1.17308	Not Interesting
1632	g6635	sp|Q7Z7L7|ZER1_HUMAN	-0.200821	-0.577315	Not Interesting
16322	g3229	NA	-0.387439	-0.577565	Not Interesting
1635	g6635	sp|Q7Z7L7|ZER1_HUMAN	-0.566355	-0.536213	Not Interesting
1636	g6635	sp|Q7Z7L7|ZER1_HUMAN	0.63925	-0.0317422	Not Interesting
16361	g829	NA	1.07755	1.07269	Not Interesting
16390	g9381	NA	-0.613481	-0.90295	Not Interesting
16440	g9394	sp|Q12982|BNIP2_HUMAN	0.962685	1.44527	Not Interesting
16447	g9398	sp|Q5E9Y6|PRUNE_BOVIN	0.531095	0.696262	Not Interesting
1645	g6636	NA	1.11821	0.805091	Not Interesting
16495	g13655	sp|Q8IVV2|LOXH1_HUMAN	-0.290952	-0.707094	Not Interesting
16522	g13659	NA	-0.348622	-0.824501	Not Interesting
16561	g13672	sp|A4IHS2|BOP1_XENTR	0.567346	0.637474	Not Interesting
16632	NA	NA	-0.20926	-0.563534	Not Interesting
16638	NA	NA	-0.607779	-0.798269	Not Interesting
16646	g27912	sp|Q9Y5M8|SRPRB_HUMAN	0.513386	1.27809	Not Interesting
1666	g6643	NA	1.01285	0.854117	Not Interesting
16700	g27947	NA	0.254365	1.2249	Not Interesting
16739	g27960	NA	-0.897129	-1.14545	Not Interesting
16758	g9102	sp|Q00534|CDK6_HUMAN	-0.513655	-0.760434	Not Interesting
16774	g9107	sp|D3YXS5|KIF28_MOUSE	-0.833762	-0.824712	Not Interesting
16775	g9107	sp|D3YXS5|KIF28_MOUSE	-0.911603	-0.62019	Not Interesting
16803	g32575	NA	-0.461638	-0.851155	Not Interesting
1682	g6650	NA	-0.247789	-0.888594	Not Interesting
1684	g6652	sp|O14672|ADA10_HUMAN	0.757045	0.782704	Not Interesting
16851	g13918	sp|P31836|NCAM1_BOVIN	0.709983	0.688224	Not Interesting
16890	g13928	sp|Q6GM44|MARH5_XENLA	-0.489147	-1.03439	Not Interesting
16912	g13929	sp|Q5RA22|5NTC_PONAB	-0.942768	-1.52164	Not Interesting
16913	g13929	sp|Q5RA22|5NTC_PONAB	0.645916	0.094573	Not Interesting
16917	g13929	sp|Q5RA22|5NTC_PONAB	-0.257331	-0.681927	Not Interesting
16918	g13929	sp|Q5RA22|5NTC_PONAB	-0.506297	-0.639315	Not Interesting
16954	g13939	sp|Q9CPU4|MGST3_MOUSE	-0.413649	-0.980062	Not Interesting
16970	g13944	sp|A2XQE8|SAG39_ORYSI	-0.424436	-0.822586	Not Interesting
16986	g8398	sp|Q07994|NCPR_MUSDO	0.888153	1.31072	Not Interesting
16988	g8398	sp|Q07994|NCPR_MUSDO	1.26145	1.39697	Not Interesting
16989	g8398	sp|Q07994|NCPR_MUSDO	1.4931	1.35036	Not Interesting
16990	g8398	sp|Q07994|NCPR_MUSDO	1.05406	0.993682	Not Interesting
16991	g8398	sp|Q07994|NCPR_MUSDO	1.21072	0.780034	Not Interesting
16992	g8398	sp|Q07994|NCPR_MUSDO	1.23069	1.1333	Not Interesting
16994	g8398	sp|Q07994|NCPR_MUSDO	0.689431	0.955007	Not Interesting
17054	g8427	sp|Q8JI28|TLL1_XENLA	1.79105	1.04779	Not Interesting
1707	g6657	sp|Q8NI77|KI18A_HUMAN	1.1199	0.642006	Not Interesting
17083	g8439	sp|Q5XG87|PAPD7_HUMAN	0.224703	0.952236	Not Interesting
17093	NA	NA	-0.693443	-1.01584	Not Interesting
17097	g32900	NA	2.14712	2.18356	Not Interesting
1710	g6657	sp|Q8NI77|KI18A_HUMAN	0.977207	1.43788	Not Interesting
17117	g32916	NA	-0.523496	-0.651935	Not Interesting
17129	g32919	NA	-0.832247	-1.1591	Not Interesting
17141	g32919	NA	-2.04182	-1.24473	Not Interesting
17144	g32919	NA	1.0086	0.913657	Not Interesting
17212	g7459	sp|P78325|ADAM8_HUMAN	-0.372977	-0.44497	Not Interesting
17213	g7459	sp|P78325|ADAM8_HUMAN	-0.532784	-0.912255	Not Interesting
17233	g154	sp|P11680|PROP_MOUSE	-0.658548	-1.00769	Not Interesting
17253	g159	NA	0.687555	1.43104	Not Interesting
17358	g196	sp|Q9PV90|RLA0_DANRE	0.658046	0.120519	Not Interesting
17406	g213	NA	1.44634	1.20213	Not Interesting
1741	g3602	sp|Q5RCY3|EMP1_PONAB	-0.372699	-0.485626	Not Interesting
17410	g213	NA	-0.99967	-0.955535	Not Interesting
17412	g213	NA	-0.616455	-0.917191	Not Interesting
1743	g3603	NA	-0.351171	-0.801865	Not Interesting
1744	g3603	NA	-0.429154	-0.437144	Not Interesting
17456	g4669	sp|Q7ZWA3|RBMX_DANRE	-0.50566	-0.577078	Not Interesting
17459	g4670	NA	2.82239	2.69598	Not Interesting
17460	g4670	NA	1.3182	1.21086	Not Interesting
17464	g4670	NA	-1.13184	-1.5278	Not Interesting
17485	g4675	NA	0.467088	0.673984	Not Interesting
17504	g4679	sp|Q7U6F4|RIMK_SYNPX	-0.8657	-1.01991	Not Interesting
17519	g14003	sp|O35607|BMPR2_MOUSE	-0.472305	-0.218991	Not Interesting
17522	g14003	sp|O35607|BMPR2_MOUSE	-0.822923	-1.00014	Not Interesting
17533	g14012	sp|Q9NYL2|MLTK_HUMAN	1.46293	1.06132	Not Interesting
17534	g14012	sp|Q9NYL2|MLTK_HUMAN	1.17366	0.969051	Not Interesting
17539	g14012	sp|Q9NYL2|MLTK_HUMAN	2.11348	1.44615	Not Interesting
1756	g3605	NA	-1.04414	-1.06354	Not Interesting
17571	g1742	sp|Q5XXP2|OPN4_PHOSU	0.631012	0.929245	Not Interesting
17572	g1742	sp|Q5XXP2|OPN4_PHOSU	0.353404	1.28277	Not Interesting
17575	g1743	sp|Q16363|LAMA4_HUMAN	2.87326	2.49274	Not Interesting
17576	g1743	sp|Q16363|LAMA4_HUMAN	2.09618	1.90125	Not Interesting
17587	g1744	sp|Q00174|LAMA_DROME	1.428	1.28203	Not Interesting
17598	g1746	sp|B3EWZ8|ECT_ACRMI	-0.558851	-0.762605	Not Interesting
17603	g1747	sp|Q7TMV1|RN139_MOUSE	0.810308	0.798711	Not Interesting
17642	g1757	NA	0.882854	0.984823	Not Interesting
17643	g1758	NA	-0.73275	-1.55625	Not Interesting
17700	g1773	NA	0.896092	0.59128	Not Interesting
17704	g1775	NA	-0.628214	-0.928989	Not Interesting
17729	g1781	sp|P28075|PSB5_RAT	0.601897	0.878683	Not Interesting
17748	g1784	NA	0.323128	0.687026	Not Interesting
17786	g1822	sp|A1VGB0|HLDD_DESVV	0.647383	1.00244	Not Interesting
1783	g3621	NA	-0.642976	-0.486158	Not Interesting
17832	g1836	sp|Q8AWH3|SX17A_XENTR	1.31282	1.56424	Not Interesting
1784	g3621	NA	-0.482514	-0.590967	Not Interesting
17876	g1849	NA	-0.508606	-0.677553	Not Interesting
17883	g1849	NA	1.07715	1.11311	Not Interesting
1789	g3622	NA	-0.314214	-0.50006	Not Interesting
17916	g1858	sp|Q2Z1R2|SOX1B_DANRE	-0.824525	-0.851189	Not Interesting
17922	g1858	sp|Q2Z1R2|SOX1B_DANRE	-1.70352	-1.78192	Not Interesting
17930	g1865	sp|Q95SX7|RTBS_DROME	-0.833272	-0.973074	Not Interesting
17953	g1870	sp|Q02391|GSLG1_CHICK	0.532133	0.998394	Not Interesting
17954	g1870	sp|Q02391|GSLG1_CHICK	0.678517	1.17014	Not Interesting
17956	g1870	sp|Q02391|GSLG1_CHICK	0.584757	1.00326	Not Interesting
17985	g1874	sp|P56945|BCAR1_HUMAN	1.12575	0.652598	Not Interesting
17986	g1874	sp|P56945|BCAR1_HUMAN	1.45224	1.01443	Not Interesting
17990	g1874	sp|P56945|BCAR1_HUMAN	-0.462393	-0.969735	Not Interesting
17992	g1874	sp|P56945|BCAR1_HUMAN	-0.77052	-0.808537	Not Interesting
17994	g1875	NA	-0.572591	-0.771438	Not Interesting
18008	g1877	sp|Q6TMK4|POXA_DICDI	-0.571347	-0.832213	Not Interesting
18009	g1877	sp|Q6TMK4|POXA_DICDI	-1.34753	-1.31612	Not Interesting
18010	g1877	sp|Q6TMK4|POXA_DICDI	-1.05691	-0.819011	Not Interesting
18017	g1879	NA	-0.699469	-1.1401	Not Interesting
18036	g1882	sp|Q99L88|SNTB1_MOUSE	0.55116	0.454887	Not Interesting
18131	g6671	NA	-0.416771	-0.811999	Not Interesting
18157	g13899	sp|C6KSQ6|RAD50_PLAF7	-1.00801	-1.94947	Not Interesting
18176	g13904	NA	1.20765	0.833271	Not Interesting
18192	g13907	sp|O88866|HUNK_MOUSE	-0.992928	-0.612329	Not Interesting
18218	g13917	NA	0.99179	1.76844	Not Interesting
18219	g13917	NA	1.50609	1.99772	Not Interesting
18220	g13917	NA	1.48599	1.67355	Not Interesting
18222	g13917	NA	0.540796	0.664139	Not Interesting
18336	g56	sp|Q9H306|MMP27_HUMAN	1.32037	1.91008	Not Interesting
18350	g33237	sp|Q6DE55|HMHA1_XENLA	0.0626747	-0.722991	Not Interesting
18359	g33238	NA	-0.864611	-0.991663	Not Interesting
18375	g33239	sp|F1MCA7|LRRC7_BOVIN	-0.119826	-0.641072	Not Interesting
18382	g33242	NA	1.81709	1.64929	Not Interesting
18387	g33243	sp|P21328|RTJK_DROME	-0.281374	-0.456075	Not Interesting
18390	g33243	sp|P21328|RTJK_DROME	-0.432774	-0.92289	Not Interesting
18451	g1284	NA	0.745237	0.766187	Not Interesting
18477	g20330	NA	-0.640927	-1.15022	Not Interesting
18496	g32409	sp|Q9NBX4|RTXE_DROME	-1.25262	-1.22952	Not Interesting
18524	g32923	NA	-0.296081	-0.727122	Not Interesting
18555	g29774	NA	-1.05873	-0.907279	Not Interesting
18573	g11732	NA	0.751752	0.708867	Not Interesting
18616	g11745	sp|Q90623|MYPT1_CHICK	-0.501322	-0.711911	Not Interesting
18685	g11758	sp|Q29IM7|CASP8_DROPS	0.346741	1.12948	Not Interesting
18697	g11761	sp|Q9JHX4|CASP8_RAT	0.601414	0.872973	Not Interesting
18749	g1705	sp|Q8N8A2|ANR44_HUMAN	1.1101	-0.00916526	Not Interesting
18802	g33728	sp|Q01433|AMPD2_HUMAN	-0.474151	-0.646268	Not Interesting
18821	g33731	sp|P70566|TMOD2_RAT	-0.855709	-1.04212	Not Interesting
18822	g33731	sp|P70566|TMOD2_RAT	-0.783543	0.0285685	Not Interesting
18827	g33731	sp|P70566|TMOD2_RAT	-0.959997	-0.983528	Not Interesting
1890	g26908	NA	0.571587	0.886327	Not Interesting
18928	g33753	sp|Q923U9|S40A1_RAT	-0.872288	-1.12682	Not Interesting
18938	g20571	sp|A7SXK3|TMED_NEMVE	-1.12244	-0.878582	Not Interesting
18984	g4955	sp|Q49SH1|NCKX5_DANRE	-0.105509	-0.768412	Not Interesting
190	g18915	sp|Q6TLH3|CUED2_DANRE	0.413405	0.901594	Not Interesting
19010	g4958	sp|Q7Z494|NPHP3_HUMAN	-0.502705	-1.15163	Not Interesting
19071	g14267	sp|Q921D9|GRHL1_MOUSE	-1.34522	-1.93264	Not Interesting
19082	g14269	NA	0.273757	0.783682	Not Interesting
19151	g9900	sp|P0CF95|BICL1_DANRE	1.17602	0.851095	Not Interesting
19163	g9901	sp|Q95SX7|RTBS_DROME	-0.566586	-0.858634	Not Interesting
19207	g9923	NA	0.271453	0.784094	Not Interesting
19238	g22825	sp|Q9DBU0|TM9S1_MOUSE	3.20414	2.98888	Not Interesting
19295	g22837	sp|Q8NB78|KDM1B_HUMAN	0.667796	1.25958	Not Interesting
19309	g22844	sp|Q8SVY9|Y3G1_ENCCU	0.492116	1.23041	Not Interesting
1934	g28526	sp|Q60855|RIPK1_MOUSE	-0.179338	-0.555971	Not Interesting
19340	NA	NA	0.086157	0.833573	Not Interesting
19348	g12030	sp|Q920M9|SIAH1_RAT	-0.529736	-0.287764	Not Interesting
19368	g12039	sp|Q505D9|TRI67_MOUSE	1.04263	0.77248	Not Interesting
19379	g12041	NA	0.207635	0.914424	Not Interesting
19396	g12044	NA	0.500222	0.152801	Not Interesting
19404	g12048	sp|P62282|RS11_RAT	0.507554	0.263227	Not Interesting
19415	g12055	NA	-1.09512	-0.898531	Not Interesting
19416	g12055	NA	-1.18569	-1.28772	Not Interesting
1946	g28530	NA	-0.624532	-0.795055	Not Interesting
19461	g12061	sp|Q08DQ2|GFPT2_BOVIN	0.78195	1.18699	Not Interesting
19474	g9559	NA	0.559483	0.53931	Not Interesting
19478	g9560	sp|Q9R1A8|RFWD2_MOUSE	1.66643	2.02053	Not Interesting
19479	g9560	sp|Q9R1A8|RFWD2_MOUSE	2.62107	1.84377	Not Interesting
19489	g9563	NA	1.14393	0.726223	Not Interesting
19502	g9565	sp|Q27746|DNMT1_PARLI	3.85571	3.80645	Not Interesting
19538	g9572	sp|P26436|ASPX_HUMAN	1.66294	1.37177	Not Interesting
19588	g12853	sp|P35317|AT1A_HYDVU	-0.373663	-0.696217	Not Interesting
19598	g8541	sp|Q9QZD5|RAE2_MOUSE	0.538344	0.171191	Not Interesting
19600	g8541	sp|Q9QZD5|RAE2_MOUSE	-0.768103	-1.15593	Not Interesting
19611	g8550	sp|Q9UHC3|ASIC3_HUMAN	-0.895089	-1.01489	Not Interesting
19615	g8550	sp|Q9UHC3|ASIC3_HUMAN	-0.490674	-0.555545	Not Interesting
1967	g13488	NA	0.797949	0.917131	Not Interesting
19678	g8572	NA	0.37277	0.692197	Not Interesting
19684	g8573	NA	-0.399943	-0.672622	Not Interesting
19759	g8603	sp|Q6ZR37|PKHG7_HUMAN	0.627419	0.433461	Not Interesting
1976	g7336	NA	-0.512028	-0.562269	Not Interesting
19777	g8603	sp|Q6ZR37|PKHG7_HUMAN	1.15069	0.720707	Not Interesting
19785	g8604	sp|Q58D06|WDR74_BOVIN	0.564952	0.61036	Not Interesting
19801	g8605	sp|Q92545|TM131_HUMAN	0.605317	1.27182	Not Interesting
19811	g8605	sp|Q92545|TM131_HUMAN	-0.413737	-0.660092	Not Interesting
19824	g8608	NA	-1.41181	-1.0808	Not Interesting
19838	g8611	NA	0.96344	0.855528	Not Interesting
19888	g32578	sp|Q6NS59|F135A_MOUSE	0.674984	1.19376	Not Interesting
19896	g32580	sp|Q9Z1M8|RED_MOUSE	0.112907	0.771909	Not Interesting
19897	g32581	sp|Q5M9G0|DCTD_RAT	0.460831	0.550828	Not Interesting
19904	g32582	sp|Q1W617|SHRM4_MOUSE	-1.28818	-1.3526	Not Interesting
19913	g32584	sp|A8KBG2|PGAP2_XENTR	0.639286	0.692521	Not Interesting
19918	g32585	sp|Q9Z125|CR3L1_MOUSE	1.34378	1.2749	Not Interesting
19919	g32585	sp|Q9Z125|CR3L1_MOUSE	0.928344	1.04971	Not Interesting
19926	g32585	sp|Q9Z125|CR3L1_MOUSE	0.85188	1.30558	Not Interesting
19959	g15773	NA	0.0299966	0.656131	Not Interesting
19960	g15773	NA	-0.565788	-0.858559	Not Interesting
19971	g15774	sp|P51577|P2RX4_RAT	0.303885	1.09619	Not Interesting
200	g18917	sp|Q16827|PTPRO_HUMAN	-0.38924	-0.704245	Not Interesting
20023	g15793	NA	-0.680692	-0.903177	Not Interesting
20024	g15793	NA	-0.41664	-0.818119	Not Interesting
20030	g15795	sp|P98164|LRP2_HUMAN	-0.812496	-0.941625	Not Interesting
20054	g26100	sp|P22031|LEG_HELCR	-0.700102	-0.725917	Not Interesting
20072	g26104	sp|Q8LGG8|USPAL_ARATH	-0.499606	-0.449537	Not Interesting
20075	g26105	NA	-0.812923	-0.262348	Not Interesting
20089	g26107	sp|Q9BQS2|SYT15_HUMAN	0.46978	0.855042	Not Interesting
201	g18917	sp|Q16827|PTPRO_HUMAN	0.999896	0.365614	Not Interesting
20113	g26120	sp|P98191|CDS1_MOUSE	-0.946766	-0.983049	Not Interesting
2014	g10564	sp|O00370|LORF2_HUMAN	-0.835181	-0.637886	Not Interesting
20160	NA	NA	1.06845	0.956417	Not Interesting
20179	g2865	NA	-0.690863	-0.74281	Not Interesting
20180	g2865	NA	-1.57725	-1.61943	Not Interesting
20181	g2865	NA	-0.53584	-0.751896	Not Interesting
20188	g2866	NA	0.891652	1.50046	Not Interesting
2019	g10565	sp|Q9WVM4|ICMT_RAT	0.692964	0.918487	Not Interesting
20194	g2869	NA	-0.621567	-0.980126	Not Interesting
20224	g17412	sp|Q3V5L5|MGT5B_HUMAN	-0.4393	-0.991918	Not Interesting
20245	NA	NA	-0.553576	-0.838391	Not Interesting
20262	g18032	NA	1.29352	0.914901	Not Interesting
20276	g18038	NA	0.440794	1.10169	Not Interesting
20317	g32017	sp|Q24547|STX1A_DROME	1.98492	2.08424	Not Interesting
20320	g32018	sp|Q24547|STX1A_DROME	1.76083	1.68851	Not Interesting
20323	g32018	sp|Q24547|STX1A_DROME	1.32376	1.69423	Not Interesting
20324	g32018	sp|Q24547|STX1A_DROME	1.74362	1.5243	Not Interesting
20327	g32018	sp|Q24547|STX1A_DROME	1.21037	0.944498	Not Interesting
20345	g13299	sp|Q8CG19|LTBP1_MOUSE	-1.34618	-0.86769	Not Interesting
20346	g13299	sp|Q8CG19|LTBP1_MOUSE	-0.941814	-1.32279	Not Interesting
20371	NA	NA	-0.451435	-0.651341	Not Interesting
2038	g10567	NA	-0.217104	-0.607403	Not Interesting
20386	g5384	NA	1.19513	1.08495	Not Interesting
20424	g5392	NA	-0.598574	-0.873238	Not Interesting
20428	g5392	NA	-0.395724	-0.655043	Not Interesting
20454	g5398	NA	-1.22433	-1.4356	Not Interesting
2049	g16741	NA	-0.656739	-0.782051	Not Interesting
20491	g65	NA	-0.4783	-0.216285	Not Interesting
2050	g16741	NA	0.898037	0.694237	Not Interesting
20501	g68	sp|O57525|CP17A_RANDY	-0.673399	-0.7968	Not Interesting
2053	g16741	NA	0.340892	0.76315	Not Interesting
20532	g70	NA	-0.490197	-0.736221	Not Interesting
20562	g11083	NA	-0.642897	-1.09304	Not Interesting
20570	g11085	NA	-0.22003	-0.903576	Not Interesting
20576	g11088	NA	-0.908222	-0.476737	Not Interesting
20600	g11093	sp|Q9QWY8|ASAP1_MOUSE	-0.349625	-0.507114	Not Interesting
20611	g11095	sp|P97494|GSH1_MOUSE	-0.421407	-0.877629	Not Interesting
2063	g16742	NA	-0.642413	-0.782567	Not Interesting
2065	g16743	NA	-0.246367	-0.581578	Not Interesting
20657	g25443	NA	-1.17634	-1.59524	Not Interesting
20663	g25448	sp|Q09575|YRD6_CAEEL	0.670066	0.6624	Not Interesting
20669	g25449	NA	0.684005	0.537708	Not Interesting
20725	g25486	NA	0.566473	0.631544	Not Interesting
20729	g25487	sp|P08770|TRA1_MAIZE	-0.677067	-0.730562	Not Interesting
20778	g25501	NA	1.81566	1.5914	Not Interesting
20788	g25504	sp|Q5XI59|RNF10_RAT	0.582169	0.767842	Not Interesting
208	g18917	sp|Q16827|PTPRO_HUMAN	0.725206	0.880029	Not Interesting
2082	g16751	NA	-0.222389	-0.674065	Not Interesting
20856	NA	NA	0.424671	0.645377	Not Interesting
20913	g6782	NA	1.10093	0.503914	Not Interesting
21035	g13571	sp|Q9M2N5|DSLE_ARATH	0.344183	1.333	Not Interesting
21074	g16879	sp|Q9VSF3|UBC12_DROME	2.38606	1.77844	Not Interesting
21075	g16879	sp|Q9VSF3|UBC12_DROME	2.14093	1.52625	Not Interesting
21078	g16880	NA	0.555745	1.06398	Not Interesting
21086	g16882	NA	2.15205	2.11814	Not Interesting
21140	g16905	sp|A7SVT1|FICD_NEMVE	0.374219	0.710673	Not Interesting
21161	g16907	sp|B3EWZ6|MLRP2_ACRMI	-0.63696	-0.699865	Not Interesting
21191	g10729	NA	-1.32067	-1.6889	Not Interesting
21257	g21991	sp|Q3T075|STX8_BOVIN	0.580957	0.96813	Not Interesting
21258	g21991	sp|Q3T075|STX8_BOVIN	-0.587803	-0.5827	Not Interesting
21262	g21993	sp|P24733|MYS_ARGIR	1.13086	2.0448	Not Interesting
21264	g21993	sp|P24733|MYS_ARGIR	0.707333	0.799863	Not Interesting
21267	g21993	sp|P24733|MYS_ARGIR	-0.397532	-0.533574	Not Interesting
2127	g30816	NA	-0.490372	-0.624393	Not Interesting
21287	g21996	sp|B1AQJ2|UBP36_MOUSE	-0.420738	-0.978707	Not Interesting
2131	g30816	NA	0.882313	1.26385	Not Interesting
21333	g13796	NA	-0.673934	-0.63794	Not Interesting
21359	g13799	NA	-0.471182	-0.762925	Not Interesting
21360	g13799	NA	-0.894723	-0.939063	Not Interesting
21369	g13800	sp|Q6PH57|GBB1_DANRE	-0.436272	-0.93062	Not Interesting
21376	g13800	sp|Q6PH57|GBB1_DANRE	-0.654481	-0.969215	Not Interesting
21397	g13809	sp|Q8WX94|NALP7_HUMAN	-0.304486	-0.496012	Not Interesting
21398	g13809	sp|Q8WX94|NALP7_HUMAN	-0.636025	-0.947049	Not Interesting
21437	g13814	sp|Q63406|MCF2L_RAT	-0.732983	-0.756207	Not Interesting
21441	g13816	NA	0.396969	0.633767	Not Interesting
21443	g13818	NA	-0.148284	-0.554531	Not Interesting
21452	g4067	NA	-0.310353	-0.538093	Not Interesting
21453	g4067	NA	-0.440648	-0.514519	Not Interesting
21454	g4068	sp|P57103|NAC3_HUMAN	-1.02267	-1.26139	Not Interesting
2147	g30824	sp|Q08DK7|MCATL_BOVIN	0.779117	1.22878	Not Interesting
21475	g4080	sp|Q53H47|SETMR_HUMAN	-0.699983	-0.90788	Not Interesting
21496	g4083	sp|Q54LN4|GGHA_DICDI	-0.329501	-0.461249	Not Interesting
21504	g4084	sp|Q9QZC7|PKHB2_MOUSE	0.98242	0.691419	Not Interesting
21535	g4093	sp|P21127|CD11B_HUMAN	0.824681	0.541875	Not Interesting
21555	g4108	NA	0.246593	0.753695	Not Interesting
2157	g30824	sp|Q08DK7|MCATL_BOVIN	-1.24977	-0.562437	Not Interesting
21579	g4115	sp|Q90Y57|JAG1A_DANRE	-1.10693	-1.04351	Not Interesting
2158	g30824	sp|Q08DK7|MCATL_BOVIN	-0.521401	-0.647819	Not Interesting
21601	g23620	sp|P61315|G3ST3_MOUSE	-1.03755	-0.780371	Not Interesting
21608	g23620	sp|P61315|G3ST3_MOUSE	1.09801	1.28902	Not Interesting
21638	g23638	sp|Q9UIK4|DAPK2_HUMAN	-0.688112	-0.896943	Not Interesting
21640	g23638	sp|Q9UIK4|DAPK2_HUMAN	-0.559659	-0.459477	Not Interesting
21641	g23638	sp|Q9UIK4|DAPK2_HUMAN	-0.733142	-0.72386	Not Interesting
21672	g8887	NA	-0.521068	-0.871717	Not Interesting
21690	NA	NA	-1.19846	-2.0049	Not Interesting
21709	g12803	NA	-0.183496	-0.901569	Not Interesting
21710	g12804	NA	-0.837018	-0.733603	Not Interesting
21714	g2672	NA	-0.920318	-1.12463	Not Interesting
21738	g14016	NA	-0.741691	-1.24067	Not Interesting
21741	g14017	NA	-0.491085	-0.846602	Not Interesting
21744	g14017	NA	0.351878	0.905263	Not Interesting
21749	g14018	sp|Q15063|POSTN_HUMAN	-0.983949	-0.818842	Not Interesting
21750	g14018	sp|Q15063|POSTN_HUMAN	-1.18834	-1.27538	Not Interesting
21761	g14025	sp|P60670|NPL4_MOUSE	-0.846598	-1.09957	Not Interesting
21774	g14033	sp|Q5F3I6|TM104_CHICK	0.529257	1.03738	Not Interesting
21777	g14034	NA	0.8346	1.07215	Not Interesting
21779	g14034	NA	0.0685874	-0.712744	Not Interesting
21798	NA	NA	-0.72777	-0.669397	Not Interesting
21898	g7738	NA	-0.136213	0.793941	Not Interesting
21907	g7740	sp|Q1ZZH1|GRM3_MACFA	-1.04205	-0.958354	Not Interesting
21928	g10585	sp|Q8IZJ1|UNC5B_HUMAN	-0.547683	-0.627252	Not Interesting
21935	g10585	sp|Q8IZJ1|UNC5B_HUMAN	0.634509	0.372439	Not Interesting
21956	g10588	sp|Q9V785|3BP5H_DROME	0.973646	0.778525	Not Interesting
21960	g10588	sp|Q9V785|3BP5H_DROME	1.04753	0.202445	Not Interesting
21963	g10588	sp|Q9V785|3BP5H_DROME	0.485101	0.891127	Not Interesting
21971	g10589	sp|Q96RW7|HMCN1_HUMAN	0.549894	0.5813	Not Interesting
21976	g10590	sp|P39447|ZO1_MOUSE	0.880136	0.519727	Not Interesting
21984	g10591	sp|Q499N2|AP5M1_RAT	1.42442	1.25709	Not Interesting
21985	g10591	sp|Q499N2|AP5M1_RAT	1.73818	1.58509	Not Interesting
21996	g10593	sp|Q6AZB8|HARB1_DANRE	0.714488	0.0622834	Not Interesting
21999	g10594	sp|O35426|XBP1_MOUSE	1.11219	0.855821	Not Interesting
22001	g10595	sp|Q5SVZ6|ZMYM1_HUMAN	-0.287162	-0.729288	Not Interesting
22016	g10596	NA	-0.610691	-0.836927	Not Interesting
2202	g30835	sp|O22719|LHTL3_ARATH	0.48531	1.20319	Not Interesting
22033	g10604	sp|P49715|CEBPA_HUMAN	-0.967749	-1.39673	Not Interesting
22035	g10604	sp|P49715|CEBPA_HUMAN	-0.484144	-0.460015	Not Interesting
2209	g30835	sp|O22719|LHTL3_ARATH	1.22712	1.53011	Not Interesting
22099	NA	NA	-0.687198	-0.326277	Not Interesting
22119	g7859	sp|P32674|PFLD_ECOLI	-0.707554	-0.235882	Not Interesting
22137	g7861	NA	0.391082	0.600176	Not Interesting
22143	g7863	sp|Q66HA4|TAXB1_RAT	-0.363536	-0.636031	Not Interesting
22171	g7872	sp|Q8R4V5|OIT3_MOUSE	2.93411	2.2124	Not Interesting
22175	g7872	sp|Q8R4V5|OIT3_MOUSE	1.63521	1.83067	Not Interesting
22194	g9459	sp|Q7Z3K3|POGZ_HUMAN	-0.494657	-0.943176	Not Interesting
222	g18922	sp|P97739|ECE1_CAVPO	-1.59212	-1.3608	Not Interesting
22213	g27123	NA	-0.391727	-1.01403	Not Interesting
22226	g1266	sp|O16025|AOSL_PLEHO	-0.823754	-0.833064	Not Interesting
22253	g8452	NA	-0.412738	-1.04077	Not Interesting
22284	g8461	sp|Q9UIF8|BAZ2B_HUMAN	0.685172	0.870832	Not Interesting
22428	g8503	NA	-0.552673	-1.05654	Not Interesting
22430	g8503	NA	-0.564092	-0.91574	Not Interesting
22459	g8511	sp|Q1LZ71|LFG2_BOVIN	1.15233	0.90085	Not Interesting
22464	g8511	sp|Q1LZ71|LFG2_BOVIN	-0.360919	-0.434518	Not Interesting
22465	g8511	sp|Q1LZ71|LFG2_BOVIN	0.523682	1.24116	Not Interesting
22518	g8046	sp|Q9NYT0|PLEK2_HUMAN	0.866096	1.08355	Not Interesting
22564	g25546	NA	-0.279604	-0.817892	Not Interesting
22567	g25548	NA	-0.661056	-0.695407	Not Interesting
22588	g25556	sp|A7E2S9|A30BL_HUMAN	0.608681	0.861597	Not Interesting
2259	g308	sp|O00222|GRM8_HUMAN	-0.784642	-1.18553	Not Interesting
22592	g25556	sp|A7E2S9|A30BL_HUMAN	0.595132	1.48381	Not Interesting
22597	g25557	sp|Q9H1Y3|OPN3_HUMAN	-1.14412	-1.30566	Not Interesting
2260	g308	sp|O00222|GRM8_HUMAN	-1.57884	-2.31797	Not Interesting
22605	g25561	NA	0.584862	0.681517	Not Interesting
22618	g25565	sp|Q8AVY1|ODF3A_XENLA	0.646204	0.798575	Not Interesting
22619	g25565	sp|Q8AVY1|ODF3A_XENLA	-1.16077	-1.32469	Not Interesting
22651	g25574	NA	-0.671213	-0.773261	Not Interesting
22652	g25574	NA	-1.15459	-0.709966	Not Interesting
22660	g25575	sp|Q6AVI0|RSLE2_ORYSJ	0.495195	0.879223	Not Interesting
22700	g25581	sp|Q2KJG3|SYNC_BOVIN	1.72818	1.43959	Not Interesting
22702	g25581	sp|Q2KJG3|SYNC_BOVIN	1.65425	1.78066	Not Interesting
22710	g25581	sp|Q2KJG3|SYNC_BOVIN	1.56472	1.44245	Not Interesting
22711	g25581	sp|Q2KJG3|SYNC_BOVIN	0.434365	0.387257	Not Interesting
22774	g12915	sp|O45818|DKF2_CAEEL	-1.31989	-1.08503	Not Interesting
22797	g12926	NA	-1.10846	-1.18312	Not Interesting
22843	g12939	sp|Q3UZD5|PRDM6_MOUSE	0.534636	0.314819	Not Interesting
22891	g12945	NA	-0.562206	-0.659285	Not Interesting
22903	g12948	sp|Q8BW94|DYH3_MOUSE	-0.0717451	-0.69803	Not Interesting
22921	g12951	NA	0.823808	1.09784	Not Interesting
22929	g12952	sp|P79113|NPY2R_BOVIN	-0.636163	-0.859831	Not Interesting
22937	g12966	NA	-0.461241	-0.476522	Not Interesting
22975	g21184	NA	-1.06944	-1.1773	Not Interesting
22984	g5147	NA	-0.554589	-0.354323	Not Interesting
22999	g5150	sp|Q12802|AKP13_HUMAN	0.0103148	0.748194	Not Interesting
23008	g5152	sp|Q8N1W1|ARG28_HUMAN	0.214811	1.06924	Not Interesting
23041	g5158	NA	0.404459	0.548775	Not Interesting
23065	g21719	NA	1.24295	0.698324	Not Interesting
231	g18923	NA	-0.775102	-1.21326	Not Interesting
23155	g23847	sp|Q2KN96|CYTSA_XENTR	-0.443001	-0.5877	Not Interesting
23157	g23847	sp|Q2KN96|CYTSA_XENTR	-1.42817	-1.39615	Not Interesting
23159	g23847	sp|Q2KN96|CYTSA_XENTR	-0.3368	-0.697428	Not Interesting
23173	g23852	sp|Q8N6T3|ARFG1_HUMAN	1.05154	0.950424	Not Interesting
23180	g23852	sp|Q8N6T3|ARFG1_HUMAN	0.615941	0.986309	Not Interesting
23184	g23856	NA	0.67287	0.72025	Not Interesting
232	g18923	NA	-0.479073	-0.872227	Not Interesting
2321	g322	NA	-0.83012	-0.906272	Not Interesting
23221	g23869	NA	-0.778466	-0.881528	Not Interesting
23230	g23869	NA	-0.451912	-0.655142	Not Interesting
23231	g23869	NA	-0.482015	-0.91698	Not Interesting
23237	g23869	NA	-0.592918	-1.30386	Not Interesting
23241	g23869	NA	-0.322409	-0.476115	Not Interesting
23278	g17928	NA	-0.496869	-0.779252	Not Interesting
23279	g17928	NA	-1.10758	-0.8023	Not Interesting
23289	g17928	NA	-0.729272	-0.99094	Not Interesting
23290	g17928	NA	-1.69656	-1.47528	Not Interesting
233	g18923	NA	-0.61489	-0.856985	Not Interesting
23320	g30657	sp|Q32KX5|LRC28_BOVIN	1.97644	1.70489	Not Interesting
23356	g30665	sp|Q2T9S3|RPC6_BOVIN	-1.14422	-1.13855	Not Interesting
23366	g30670	sp|Q9QUP4|CHST5_MOUSE	-0.512358	-0.520956	Not Interesting
23367	g30671	sp|J3S6Y1|TSEAR_MOUSE	-0.577419	-0.864878	Not Interesting
23371	g30671	sp|J3S6Y1|TSEAR_MOUSE	-0.65989	-0.531686	Not Interesting
23372	g30671	sp|J3S6Y1|TSEAR_MOUSE	-1.37569	-1.37589	Not Interesting
23425	g17462	NA	0.97354	0.575648	Not Interesting
23442	g17465	sp|Q9H8Y8|GORS2_HUMAN	0.865969	1.00607	Not Interesting
23447	g17465	sp|Q9H8Y8|GORS2_HUMAN	0.786515	1.29392	Not Interesting
23525	g20718	sp|Q6PAM0|AAKB2_MOUSE	0.583343	0.79805	Not Interesting
23577	g20728	sp|P22897|MRC1_HUMAN	-0.863197	-1.10663	Not Interesting
23592	g20735	sp|P35546|RET_MOUSE	-0.55381	-0.851129	Not Interesting
23623	g13740	NA	-0.506826	-0.837516	Not Interesting
23627	g13740	NA	0.773018	0.522914	Not Interesting
2364	g327	NA	-0.520314	-0.692866	Not Interesting
23657	g28430	NA	0.151386	0.919607	Not Interesting
23658	g28430	NA	0.592739	1.02749	Not Interesting
23660	g28430	NA	0.866517	1.23257	Not Interesting
23683	g33301	NA	-0.464692	-0.989592	Not Interesting
23720	g33035	sp|Q922R0|PRKX_MOUSE	-0.649877	-0.75157	Not Interesting
23789	g9991	sp|Q96RW7|HMCN1_HUMAN	-0.340154	-0.458892	Not Interesting
2380	g332	NA	1.21524	0.841126	Not Interesting
23809	g9993	NA	0.26634	0.894644	Not Interesting
23813	g9994	sp|Q2W2L2|RS11_MAGSA	-0.648345	-0.912037	Not Interesting
23815	g9994	sp|Q2W2L2|RS11_MAGSA	-0.658404	-0.469339	Not Interesting
23817	g9994	sp|Q2W2L2|RS11_MAGSA	-0.611528	-0.167801	Not Interesting
23843	g10006	NA	0.329337	0.389209	Not Interesting
23876	g10017	sp|Q2KIA2|TR112_BOVIN	0.69654	1.19985	Not Interesting
23877	g10017	sp|Q2KIA2|TR112_BOVIN	0.314699	0.57188	Not Interesting
23879	g10018	sp|Q4I963|COFI_GIBZE	-0.578972	-0.74617	Not Interesting
2388	g334	sp|Q9BUZ4|TRAF4_HUMAN	-0.674589	-0.792914	Not Interesting
23917	g10029	sp|Q6ZMW2|ZN782_HUMAN	0.418374	0.590568	Not Interesting
23929	g10033	NA	0.540183	0.525502	Not Interesting
23932	g10034	sp|P08419|CEL2A_PIG	1.82956	1.58068	Not Interesting
23933	g10034	sp|P08419|CEL2A_PIG	1.40389	1.34791	Not Interesting
23935	g10034	sp|P08419|CEL2A_PIG	2.22178	1.82248	Not Interesting
23944	g10037	sp|Q90YM8|CYFP1_DANRE	0.834069	1.23001	Not Interesting
23951	g10041	sp|Q90YM8|CYFP1_DANRE	-0.384527	-1.02783	Not Interesting
23963	g10045	sp|P61765|STXB1_RAT	2.10339	1.00566	Not Interesting
23965	g10046	NA	-0.641172	-0.697969	Not Interesting
23981	g10049	NA	0.599255	0.344222	Not Interesting
24025	g10056	sp|P0CJ14|VP302_LYCMC	1.45673	2.09333	Not Interesting
24031	g10056	sp|P0CJ14|VP302_LYCMC	1.90403	2.55455	Not Interesting
24047	g10067	NA	-0.47915	-0.970678	Not Interesting
24050	g10067	NA	-0.635305	-1.15789	Not Interesting
24070	g10078	sp|Q9H1Y0|ATG5_HUMAN	1.15351	0.503698	Not Interesting
24084	g10084	sp|P27448|MARK3_HUMAN	1.23274	0.776272	Not Interesting
24086	g10084	sp|P27448|MARK3_HUMAN	-0.503445	-0.775936	Not Interesting
24097	g10084	sp|P27448|MARK3_HUMAN	-0.681406	-0.931677	Not Interesting
24123	g10091	sp|Q8VIB2|DAXX_RAT	0.521265	0.507679	Not Interesting
24129	g10094	NA	0.636154	0.822502	Not Interesting
24154	g10106	sp|Q96PZ7|CSMD1_HUMAN	-0.818492	-0.922863	Not Interesting
2417	g343	sp|P31696|AGRIN_CHICK	0.130865	0.505959	Not Interesting
24184	NA	NA	-0.538417	-1.12594	Not Interesting
24202	g3240	sp|Q5UPE2|YL063_MIMIV	1.46404	1.07495	Not Interesting
24255	g33693	sp|P18428|LBP_HUMAN	-0.684936	-1.24388	Not Interesting
24265	g33693	sp|P18428|LBP_HUMAN	0.952208	1.22847	Not Interesting
24279	g33696	sp|Q5PQJ7|TBCEL_RAT	0.846176	0.666664	Not Interesting
24309	g33708	NA	0.893665	0.608805	Not Interesting
24323	g33712	NA	-1.32582	-1.20221	Not Interesting
24332	g33714	sp|Q9P2F6|RHG20_HUMAN	-0.562308	-0.70183	Not Interesting
24334	g33715	NA	-0.278084	-0.485653	Not Interesting
24352	g33718	sp|Q9D361|SNR48_MOUSE	0.889482	1.09619	Not Interesting
24363	g33720	NA	1.11971	0.978687	Not Interesting
24389	g31976	sp|P22781|DDC_CAVPO	-0.25612	-0.73672	Not Interesting
24401	g31981	sp|Q80TN5|ZDH17_MOUSE	0.698079	0.304355	Not Interesting
24407	g31982	sp|Q9YHD3|BAG6A_XENLA	0.598421	0.352802	Not Interesting
24409	g31982	sp|Q9YHD3|BAG6A_XENLA	0.423205	1.22249	Not Interesting
24475	g26539	NA	-0.559023	-0.836865	Not Interesting
24480	g26540	sp|Q6R2W3|SCND3_HUMAN	-0.403819	-1.15045	Not Interesting
24499	g21461	NA	-0.600347	-0.637493	Not Interesting
24501	g21462	NA	-1.04349	-0.458711	Not Interesting
24513	g21463	NA	-0.427644	-0.859001	Not Interesting
24522	g21466	NA	-0.547454	-0.448002	Not Interesting
24524	g21466	NA	-1.21923	-1.25502	Not Interesting
24566	g26466	sp|Q92058|PPBT_CHICK	0.524976	0.236357	Not Interesting
24574	g26468	sp|Q92058|PPBT_CHICK	1.01593	0.176036	Not Interesting
2462	g371	sp|Q9GM70|ST17A_RABIT	-0.921354	-1.22186	Not Interesting
24666	g11184	sp|Q9UBH6|XPR1_HUMAN	-1.81103	-1.40123	Not Interesting
24673	g11186	NA	-1.21327	-0.354625	Not Interesting
24676	g11186	NA	-0.598016	-0.853229	Not Interesting
24686	g11187	NA	-1.07401	-1.04675	Not Interesting
24789	g29101	sp|P79282|FUT8_PIG	-0.694617	-0.361879	Not Interesting
24791	g29101	sp|P79282|FUT8_PIG	-0.806243	-0.765761	Not Interesting
24807	g29105	sp|Q5U3U0|PHYD1_DANRE	-0.705755	-1.30088	Not Interesting
24836	g29115	sp|Q9H0H5|RGAP1_HUMAN	-0.341772	-0.354455	Not Interesting
24879	g29129	NA	0.546202	1.04335	Not Interesting
24911	g29131	NA	1.8721	1.36638	Not Interesting
24915	g29132	sp|Q9Y6P5|SESN1_HUMAN	-0.520657	-0.50988	Not Interesting
25009	g29153	sp|Q99LZ3|SLD5_MOUSE	-0.463452	-0.843267	Not Interesting
2503	g387	sp|Q9VXN0|GTDC1_DROME	0.949902	0.205046	Not Interesting
2505	g387	sp|Q9VXN0|GTDC1_DROME	-0.703568	-1.00954	Not Interesting
25187	g15826	sp|Q16659|MK06_HUMAN	-0.612321	-0.769209	Not Interesting
25194	g15826	sp|Q16659|MK06_HUMAN	-0.488337	-1.01906	Not Interesting
25232	g15838	sp|O35857|TIM44_MOUSE	0.70265	1.11345	Not Interesting
25244	g15840	sp|Q29H56|MAB21_DROPS	-0.536413	-0.720879	Not Interesting
25268	g15856	NA	-0.72824	-0.811561	Not Interesting
25290	g15863	sp|Q9WUK7|OPN3_MOUSE	-1.28432	-0.887246	Not Interesting
25294	g15864	sp|G2K3G6|INLA_LISM4	-0.856222	-0.964338	Not Interesting
25295	g15864	sp|G2K3G6|INLA_LISM4	-1.06101	-1.39665	Not Interesting
2533	g389	sp|Q5FVN8|WSDU1_RAT	1.22137	0.900636	Not Interesting
25332	g15881	sp|Q06725|N2F1A_DANRE	-0.427467	-0.659356	Not Interesting
25334	g15881	sp|Q06725|N2F1A_DANRE	-0.883649	-0.735347	Not Interesting
25339	g15882	sp|Q9Z1N9|UN13B_MOUSE	-1.23063	-0.965378	Not Interesting
25349	g15883	sp|Q9UPW8|UN13A_HUMAN	-0.994617	-0.646158	Not Interesting
25390	g15894	sp|B5ZYI7|DUT_RHILW	0.852177	0.663186	Not Interesting
25415	g15899	sp|Q9W6A8|OP1S2_DANRE	0.786713	0.290484	Not Interesting
25416	g15899	sp|Q9W6A8|OP1S2_DANRE	0.871818	0.342904	Not Interesting
25417	g15899	sp|Q9W6A8|OP1S2_DANRE	-0.78542	-1.06633	Not Interesting
25418	g15899	sp|Q9W6A8|OP1S2_DANRE	-0.743389	-1.02066	Not Interesting
25419	g15899	sp|Q9W6A8|OP1S2_DANRE	-0.402269	-0.615636	Not Interesting
25427	g15903	sp|P21329|RTJK_DROFU	0.680966	0.464163	Not Interesting
25441	g15906	sp|P13804|ETFA_HUMAN	-0.478296	-0.746595	Not Interesting
25461	g15911	sp|Q3SZ27|MIC27_BOVIN	-0.361749	-0.383755	Not Interesting
25489	g7332	NA	1.19054	0.56371	Not Interesting
25594	g30805	NA	0.729244	0.649632	Not Interesting
25599	g30807	NA	-0.610938	-0.663037	Not Interesting
25625	g31477	sp|P17972|KCNAW_DROME	-0.781807	-1.10437	Not Interesting
25668	g6061	sp|P09330|PRPS2_RAT	-0.673262	-0.622234	Not Interesting
2567	g15000	sp|Q6IYF9|SUCR1_RAT	-0.409653	-0.460299	Not Interesting
25671	g6061	sp|P09330|PRPS2_RAT	-1.59763	-1.66516	Not Interesting
2575	g15000	sp|Q6IYF9|SUCR1_RAT	0.588869	0.521948	Not Interesting
25756	g1589	sp|Q9ER41|TOR1B_MOUSE	0.211242	0.68318	Not Interesting
25769	g1591	sp|Q01973|ROR1_HUMAN	-0.774457	-0.569499	Not Interesting
25820	g1598	sp|Q52KN9|CWC22_XENLA	0.854391	0.350339	Not Interesting
25821	g1598	sp|Q52KN9|CWC22_XENLA	-0.607802	-1.24629	Not Interesting
25828	g1599	sp|Q5PR73|DIRA2_MOUSE	-0.464529	-0.588155	Not Interesting
25834	g1601	NA	-0.420493	-0.707705	Not Interesting
25861	g1605	sp|Q6P0Q8|MAST2_HUMAN	0.589113	1.2087	Not Interesting
25866	g1607	sp|Q6AX33|MAST3_XENLA	0.92346	0.629907	Not Interesting
25873	g1609	sp|P21328|RTJK_DROME	0.740247	0.565257	Not Interesting
2593	g15012	sp|Q8N653|LZTR1_HUMAN	-0.733672	-0.894359	Not Interesting
25940	g1621	NA	-0.615956	-0.704947	Not Interesting
25947	g1622	NA	-0.732745	-1.31889	Not Interesting
25950	g1622	NA	-0.246393	-0.538114	Not Interesting
25959	g1624	sp|Q61115|PTC1_MOUSE	1.26325	1.52081	Not Interesting
25962	g1624	sp|Q61115|PTC1_MOUSE	1.2876	1.43146	Not Interesting
2602	g15013	sp|Q9CQ33|LZTR1_MOUSE	-1.11555	-1.00035	Not Interesting
26047	g23177	sp|P70255|NFIC_MOUSE	-1.10304	-0.805749	Not Interesting
26050	g23177	sp|P70255|NFIC_MOUSE	-0.267371	-0.940064	Not Interesting
26052	g23177	sp|P70255|NFIC_MOUSE	1.73169	1.27454	Not Interesting
2608	g15015	sp|P22757|HE_PARLI	1.71808	1.41615	Not Interesting
26128	g27512	NA	0.64386	0.533096	Not Interesting
26137	g27513	NA	0.424178	2.42317	Not Interesting
26138	g27513	NA	0.472475	1.50119	Not Interesting
26171	g32977	NA	-0.494417	-0.807316	Not Interesting
26182	g32978	sp|Q9QYI4|DJB12_MOUSE	0.479525	1.04135	Not Interesting
26187	g32980	NA	1.88018	1.02295	Not Interesting
2619	g15019	sp|Q9NS93|TM7S3_HUMAN	1.09829	1.02831	Not Interesting
26192	g32982	sp|Q5R6T1|PDIA6_PONAB	1.47093	1.20456	Not Interesting
26206	g32985	NA	-1.0877	-1.29569	Not Interesting
26208	g32985	NA	-0.658185	-0.792904	Not Interesting
26227	g32989	sp|P48147|PPCE_HUMAN	0.942354	1.06075	Not Interesting
26228	g32989	sp|P48147|PPCE_HUMAN	0.961721	1.30858	Not Interesting
26235	g32989	sp|P48147|PPCE_HUMAN	0.338132	0.956871	Not Interesting
26246	g32991	sp|Q9Y6I9|TX264_HUMAN	-0.507712	-0.792439	Not Interesting
2625	g15023	sp|O75146|HIP1R_HUMAN	1.31648	1.25896	Not Interesting
26251	g32992	NA	-0.7362	-0.825237	Not Interesting
26265	g32996	sp|Q8WP23|BOLL_MACFA	0.56036	1.26495	Not Interesting
26275	g33001	sp|A1A4J1|PFKAL_BOVIN	-0.835761	-1.10375	Not Interesting
26289	g33006	sp|Q9R1D7|GBF1_CRIGR	-0.602648	-0.662381	Not Interesting
26318	g33020	NA	-0.598056	-0.729951	Not Interesting
26367	g25396	NA	0.88883	0.902455	Not Interesting
26385	g18208	NA	-0.657029	-0.828183	Not Interesting
26399	g26195	NA	0.815121	0.508155	Not Interesting
26403	g11774	sp|Q7ZU45|TTC25_DANRE	0.733606	0.582343	Not Interesting
26409	g11780	sp|Q62445|SP4_MOUSE	-0.670585	-0.331034	Not Interesting
26413	g11780	sp|Q62445|SP4_MOUSE	-1.23419	-0.956596	Not Interesting
2642	g15025	sp|O75146|HIP1R_HUMAN	-0.551241	-0.911413	Not Interesting
26420	g11786	sp|P61315|G3ST3_MOUSE	0.479326	0.514212	Not Interesting
26422	g11786	sp|P61315|G3ST3_MOUSE	1.31101	1.60027	Not Interesting
26425	g11786	sp|P61315|G3ST3_MOUSE	0.580468	0.899503	Not Interesting
26428	g11786	sp|P61315|G3ST3_MOUSE	1.26539	0.684677	Not Interesting
26443	g11792	sp|Q4R5C7|SRP14_MACFA	0.693785	0.452011	Not Interesting
26459	g11799	sp|O73606|KCNG2_CHICK	0.979317	0.639786	Not Interesting
26512	g11810	sp|Q8R3S2|TSN33_MOUSE	-1.08033	-1.20394	Not Interesting
26602	g11860	NA	-0.716194	-1.04771	Not Interesting
26629	g11868	NA	-0.754774	-0.917592	Not Interesting
26645	g11870	sp|Q9NBX4|RTXE_DROME	-0.196984	-0.375305	Not Interesting
26654	g11874	NA	0.937501	1.24362	Not Interesting
26674	g16424	NA	-0.0764875	0.705435	Not Interesting
26719	g1269	sp|P11680|PROP_MOUSE	-0.552609	-0.985066	Not Interesting
26767	g1276	sp|Q96RW7|HMCN1_HUMAN	-0.328967	-0.801889	Not Interesting
26770	g1278	NA	-0.898426	-0.878783	Not Interesting
26773	g1278	NA	-0.676494	-1.0743	Not Interesting
26790	g14127	NA	0.372177	0.845716	Not Interesting
26812	g6371	NA	0.660847	1.04099	Not Interesting
26813	g6372	sp|Q8BT14|CNOT4_MOUSE	0.893107	0.347808	Not Interesting
26816	g6372	sp|Q8BT14|CNOT4_MOUSE	0.43896	0.91544	Not Interesting
26822	g6373	sp|O95628|CNOT4_HUMAN	0.728577	0.384598	Not Interesting
26862	g6387	sp|P08183|MDR1_HUMAN	2.92856	2.74484	Not Interesting
26863	g6387	sp|P08183|MDR1_HUMAN	2.03996	1.69593	Not Interesting
26866	g6387	sp|P08183|MDR1_HUMAN	2.17523	2.34762	Not Interesting
26867	g6387	sp|P08183|MDR1_HUMAN	1.99727	2.03777	Not Interesting
26868	g6387	sp|P08183|MDR1_HUMAN	2.15837	1.84832	Not Interesting
26870	g6387	sp|P08183|MDR1_HUMAN	1.58468	1.69651	Not Interesting
26871	g6387	sp|P08183|MDR1_HUMAN	1.70177	1.40612	Not Interesting
26876	g6387	sp|P08183|MDR1_HUMAN	0.7531	0.773327	Not Interesting
26889	g31517	sp|Q96RW7|HMCN1_HUMAN	-0.978996	-0.336068	Not Interesting
26890	g31517	sp|Q96RW7|HMCN1_HUMAN	-0.951905	-0.800354	Not Interesting
26892	g31517	sp|Q96RW7|HMCN1_HUMAN	-1.7237	-0.926111	Not Interesting
26893	g31517	sp|Q96RW7|HMCN1_HUMAN	-1.24986	-0.927082	Not Interesting
26894	g31517	sp|Q96RW7|HMCN1_HUMAN	-1.8259	-0.738996	Not Interesting
26895	g31517	sp|Q96RW7|HMCN1_HUMAN	-1.44114	-0.870508	Not Interesting
26896	g31517	sp|Q96RW7|HMCN1_HUMAN	-1.44888	-1.03842	Not Interesting
269	g18934	sp|P42892|ECE1_HUMAN	0.384704	0.637328	Not Interesting
[truncated: 4,659 more rows]
