# Supplementary material for: Generic injuries are sufficient to induce ectopic Wnt organizers in Hydra
Source: eLife. 2021 Mar 29;10:e60562. doi: 10.7554/eLife.60562 (PMC8049744; doi:10.7554/eLife.60562)
Supplement: Supplementary file 1. — Excel workbook containing the results tables generated by edgeR as individual worksheets. Peaks were included in the analysis if they had at least 10 mapped counts per million in at least three samples. The first sheet in the workbook (‘Contrasts’) provides the formulae associated with the names assigned to each comparison in the workbook. The peakset files (‘untreated_consensus_diffbind_labels.bed’ and ‘full_consensus_diffbind_labels.bed’) used to assign the peak ID numbers used in this worksheet are provided in the repositories (Github or Dryad) associated with this study. [file elife-60562-supp1.xlsx]

## Sheet: Contrasts
Contrast Name	Contrast Formula/Description
F0H0	F0 - H0
F3H3	F3 - H3
F8H8	F8 - H8
F3F0	F3 - F0
F8F0	F8 - F0
F8F3	F8 - F3
F12F0	F12 - F0
F12F8	F12 - F8
H3H0	H3 - H0
H8H0	H8 - H0
H8H3	H8 - H3
H12H0	H12 - H0
H12H8	H12 - H8
HRFR3c0	(H3 - H0) - (F3 - F0)
HRFR8c0	(H8 - H0) - (F8 - F0)
HRFR8c3	(H8 - H3) - (F8 - F3)
HRFR12c0	(H12 - H0) - (F12 - F0)
Fi3Fi0	Fi3 - Fi0
Hi3Hi0	Hi3 - Hi0
Fi8Fi0	Fi8 - Fi0
Hi8Hi0	Hi8 - Hi0
Fi12Fi0	Fi12 - Fi0
Hi12Hi0	Hi12 - Hi0
Fi8Fi3	Fi8 - Fi3
Hi8Hi3	Hi8 - Hi3
inhib8c0	(Hi8 - Hi0) - (Fi8 - Fi0)
inhib12c0	(Hi12 - Hi0) - (Fi12 - Fi0)
inhib3	(Hi3 - Hi0) - (Fi3 - Fi0)
SC.8	Enrichment in single cell data when comparing epithelial foot clusters to epithelial head clusters. Genes near peaks that passed a significance threshold in H8H0, F8F0, or HRFR8c0 are included in analysis.
SC.12	Enrichment in single cell data when comparing epithelial foot clusters to epithelial head clusters. Genes near peaks that passed a significance threshold in H12H0, F12F0, or HRFR12c0 are included in analysis.
Note: Results from iCRT14-treated data use peak IDs provided in the full_consensus_diffbind_labels.bed file and untreated data use peak IDs provided in the untreated_consensus_diffbind_labels.bed file which can be downloaded from github.com/cejuliano/jcazet_regeneration_patterning

## Sheet: SC.8
ID	LogFC	Percent Positive, Head Cells	Percent Positive, Foot Cells	Adjusted P-value
g2198.t1|K1958-HUMAN	-1.74497	0.005	0.478	0
g4917.t1|TLD-DROME	-0.942749	0.008	0.43	7.41553e-287
g9565.t1|DNMT1-PARLI	-2.17284	0.09	0.57	1.23911e-270
g15631.t1|VP302-LYCMC	-1.78451	0.001	0.314	4.35795e-215
g15630.t1|KCP4-PINMG	-1.59152	0.002	0.304	2.44605e-204
g3710.t2|ANTA-HYDVU	-1.31505	0.053	0.372	2.12516e-157
g21159.t1|RSGI5-CLOTH	-1.30237	0	0.229	6.75149e-153
g20995.t1|GST-NOTSL	2.58734	0.579	0.157	1.51775e-152
g33666.t1|AGRG4-HUMAN	-1.03565	0.016	0.279	2.49385e-152
g32158.t1|LOX5-MESAU	-1.201	0.075	0.403	1.29625e-151
g28682.t1|CALM-METSE	1.22688	0.763	0.407	6.67842e-151
g33506.t1|TIC32-ARATH	-0.856581	0.001	0.224	5.28379e-148
g20399.t1|CO4A1-HUMAN	1.24883	0.439	0.004	7.35992e-146
g29750.t1|WNT2B-CHICK	1.58866	0.442	0.008	9.57078e-145
g10680.t1|KCP4-PINMG	-1.43203	0.171	0.532	2.2425e-139
g10604.t1|CEBPA-HUMAN	0.535559	0.973	0.89	1.05277e-136
g23421.t1|IABF-STRAW	-0.686861	0.011	0.244	1.29382e-135
g6131.t1|CP17A-ICTPU	-0.957656	0.117	0.448	1.58379e-134
g12476.t1|BAT36-CAEEL	-0.994942	0.033	0.294	3.09032e-129
g28449.t1|FD4-DROME	-0.540491	0.027	0.252	8.37244e-111
g31923.t1|INX3-DROME	0.896489	0.561	0.184	3.18633e-110
g13250.t1|AHV-ACTSK	-0.677375	0.138	0.428	3.59136e-97
g11696.t1|TPM1-HYDVU	1.60121	0.418	0.082	2.84511e-96
g24191.t1|FA5-BOVIN	0.875905	0.366	0.035	3.81296e-96
g8233.t1|USPAL-ARATH	-0.413347	0.001	0.152	5.26485e-95
g21993.t1|MYS-ARGIR	1.3833	0.559	0.247	1.15621e-93
g26351.t2|CPO-DROME	0.933974	0.365	0.042	1.36497e-92
g22983.t1|CAMT2-DICDI	0.966673	0.411	0.08	1.10276e-90
g15636.t1|FRIS-LYMST	0.759748	0.99	0.974	3.12712e-87
g22112.t1|B3GT6-MOUSE	-0.584832	0.085	0.323	5.773e-82
g14145.t1|JPH1-RABIT	-0.564965	0.208	0.504	6.44569e-81
g31462.t1|ACT-HYDVU	0.465459	0.997	0.957	5.28055e-80
g19602.t1|RUNX1-MOUSE	-0.384365	0.012	0.165	3.61746e-79
g2114.t1|TITIN-MOUSE	-0.337282	0.002	0.129	1.82695e-78
g24070.t1|TMOD1-RAT	1.51597	0.407	0.12	1.12655e-77
g33661.t1|CPEB1-PONAB	-0.730129	0.629	0.796	4.13837e-77
g3763.t1|DD3-DICDI	1.23571	0.287	0.014	4.60342e-77
g27585.t1|DIRA-CAEEL	-0.467478	0.017	0.176	6.96411e-77
g1591.t1|ROR1-HUMAN	0.888835	0.38	0.086	5.4853e-76
g3847.t1|DMTA2-XENTR	0.64451	0.414	0.109	1.02183e-72
g30616.t1|CRIS2-HUMAN	1.07984	0.368	0.085	3.79934e-71
g10761.t1|B3GN4-HUMAN	0.670692	0.354	0.073	1.00748e-69
g24773.t1|RL4A-ARATH	-0.264739	0.995	1	1.81187e-69
g30865.t1|PXDN-DROME	0.604226	0.371	0.087	1.84171e-68
g27630.t1|THIO-PLAF7	0.552098	0.951	0.933	4.32514e-68
g28515.t1|CATL-SARPE	0.740819	0.831	0.496	1.68738e-66
g10944.t1|RHOC-CHICK	-0.514939	0.139	0.38	5.50549e-66
g27778.t1|LAMC-DROME	1.69776	0.278	0.03	7.60746e-65
g33315.t1|ZN474-HUMAN	-0.782737	0.191	0.416	2.61457e-64
g710.t1|RTXE-DROME	-0.299609	0.001	0.104	6.31033e-63
g26642.t1|FBN2-MOUSE	1.14732	0.518	0.274	2.83388e-62
g18245.t1|DLLH-BRAFL	-0.381232	0.025	0.17	1.58841e-61
g18779.t1|NPY4R-MOUSE	-0.409123	0.016	0.148	2.63222e-61
g9551.t1|KS1-HYDVU	1.76482	0.232	0.008	7.15726e-61
g24685.t1|RAPB-DICDI	-0.304529	0.015	0.146	9.51792e-61
g17392.t1|SAXO1-MACFA	1.1348	0.255	0.024	7.7087e-60
g16165.t1|ZIC4-MOUSE	0.42501	0.232	0.012	1.39203e-57
g20991.t1|GST-NOTSL	0.540461	0.242	0.021	1.0727e-56
g28064.t1|WNT3-MOUSE	0.793345	0.22	0.008	1.23862e-56
g21085.t1|HPCL1-HUMAN	-0.645549	0.095	0.29	1.82061e-56
g29265.t1|ADCY9-CHICK	-0.651771	0.159	0.377	2.06151e-56
g15181.t1|PLPP3-BOVIN	-0.473698	0.072	0.255	2.43031e-56
g234.t1|CALM-SCHPO	1.44694	0.44	0.206	3.27031e-56
g2330.t1|SVIL-MOUSE	0.607762	0.447	0.189	3.28244e-55
g21347.t1|PZP-MOUSE	-1.08802	0.155	0.369	3.91076e-55
g11543.t1|MYPH-ECHGR	-0.650411	0.34	0.598	2.38132e-53
g26297.t1|MCAF1-HUMAN	0.644967	0.228	0.022	4.57719e-51
g33445.t1|MYLK-BOVIN	0.745263	0.497	0.284	8.28538e-50
g21219.t1|MYPT1-CHICK	-0.884419	0.147	0.345	2.45189e-49
g2621.t1|RSH4A-MOUSE	0.572787	0.458	0.211	1.01605e-48
g18495.t2|PTPRF-BOVIN	-0.230302	0.001	0.081	4.61853e-47
g24114.t1|OTX2-XENTR	0.384602	0.268	0.054	1.98539e-46
g29418.t1|CRIP1-RAT	0.416871	0.313	0.091	1.28103e-45
g453.t1|HUTH-RAT	0.539732	0.285	0.074	2.54729e-45
g31517.t1|HMCN1-HUMAN	0.619001	0.3	0.087	6.15903e-45
g24483.t1|DCC-MOUSE	0.806815	0.24	0.045	1.62691e-44
g13470.t1|MLC2-DROME	0.35017	0.935	0.831	3.31056e-44
g5414.t1|CGAS-NEMVE	0.487314	0.611	0.365	3.62339e-44
g21147.t1|DCAM-XENLA	0.596775	0.669	0.478	1.67637e-43
g27334.t1|GLNA-PANAR	1.20888	0.219	0.033	1.9281e-43
g27100.t1|BAG3-MOUSE	0.717467	0.523	0.304	8.0308e-43
g15676.t1|GLNA-ACOCA	0.981841	0.208	0.027	8.0236e-42
g16222.t1|BMP7-MOUSE	-0.145	0.002	0.076	1.17942e-41
g27363.t1|ODP2-HUMAN	0.576401	0.634	0.43	1.21729e-41
g31345.t1|RISC-HUMAN	0.472337	0.502	0.271	3.03231e-41
g33396.t1|OTX5-XENTR	-0.243619	0.018	0.122	3.04442e-41
g16770.t1|RS6-BRAFL	-0.189755	0.996	0.999	3.80452e-41
g15825.t1|SY65-APLCA	0.344608	0.211	0.03	6.80028e-41
g8768.t1|HXA9B-TAKRU	0.443008	0.253	0.059	1.64835e-40
g2115.t1|CFA43-HUMAN	-0.502029	0.055	0.194	2.01829e-40
g9994.t1|RS11-MAGSA	0.517638	0.265	0.069	3.84557e-40
g31590.t1|MYSU-RABIT	0.521855	0.527	0.298	1.45895e-38
g9945.t1|S2611-BOVIN	-0.226142	0.005	0.082	1.58078e-38
g29638.t2|TENA-CHICK	0.395435	0.241	0.056	3.40564e-38
g18409.t1|AIMP2-CRIGR	0.435642	0.661	0.494	5.82359e-38
g14380.t1|NCF2-BOVIN	0.357508	0.191	0.026	8.14038e-37
g472.t1|OX2R-CANLF	-0.151266	0.001	0.064	3.67051e-36
g1680.t1|AT5G2-RAT	0.187552	0.994	0.988	6.2881e-36
g21873.t1|FRIS-LYMST	0.780593	0.83	0.752	1.12232e-35
g29389.t1|CAS4-EPHMU	0.295281	0.172	0.018	3.57606e-35
g23657.t1|SPRE-BOVIN	0.441367	0.322	0.123	3.83035e-34
g29578.t1|MAD1-MOUSE	0.489464	0.51	0.314	6.96434e-34
g33422.t1|SP4-MOUSE	0.51786	0.406	0.207	2.77611e-33
g18027.t1|TRAF4-HUMAN	0.30965	0.169	0.02	4.44633e-33
g5297.t2|FLNA-MOUSE	0.448019	0.406	0.201	6.9527e-33
g79.t1|ZN436-HUMAN	0.569913	0.419	0.231	1.78207e-32
g2713.t1|MOT10-RAT	0.37195	0.198	0.041	1.858e-32
g26840.t1|ZN703-XENTR	0.338951	0.165	0.019	2.92987e-32
g10324.t2|MYPT2-HUMAN	0.351909	0.746	0.578	8.13626e-32
g27140.t1|DIRA2-HUMAN	-0.302044	0.033	0.138	9.14545e-32
g15613.t1|HPPD-DANRE	0.518934	0.62	0.465	9.36274e-32
g23434.t1|S2611-HUMAN	0.26715	0.164	0.019	1.20773e-31
g29675.t1|S22A7-MOUSE	0.290213	0.221	0.055	3.8266e-31
g16790.t1|RS17-COTJA	-0.177598	0.989	0.999	1.04238e-30
g19253.t1|CALB2-RAT	0.559961	0.161	0.02	1.86794e-30
g31231.t2|PHAR4-CHICK	0.412558	0.167	0.026	6.93729e-30
g30709.t1|GILT-BOVIN	0.899478	0.421	0.235	8.75066e-30
g32997.t1|EF1A-HYDVU	-0.17201	1	1	1.298e-29
g30995.t1|PTPRS-RAT	-0.209949	0.013	0.09	1.96325e-29
g16428.t2|KAP2-BOVIN	-0.577429	0.153	0.297	2.55525e-29
g17529.t1|KDM1A-MOUSE	-0.738893	0.095	0.227	4.02673e-29
g20410.t1|KCA10-CHICK	0.308112	0.131	0.007	4.61652e-29
g11694.t1|TPM1-HYDVU	0.198941	0.994	0.977	4.86125e-29
g20911.t1|GATA2-XENLA	-0.192177	0.017	0.098	8.2098e-29
g587.t1|OPSD-NEOAU	-0.221471	0.016	0.096	1.27182e-28
g5735.t1|RHG06-MOUSE	0.434394	0.235	0.074	1.94352e-28
g9694.t1|FGF1-CYNPY	0.683072	0.334	0.153	3.26288e-28
g8325.t1|RL10-DROME	-0.160601	0.993	0.996	4.20137e-28
g12724.t1|MYSN-DROME	0.254539	0.949	0.812	5.1685e-28
g15223.t1|MFSD8-MOUSE	0.271458	0.196	0.046	5.66379e-28
g19513.t1|RS8-SPOFR	-0.188532	0.979	0.993	6.20679e-28
g29482.t1|RHAG-HUMAN	0.26929	0.18	0.038	8.62547e-28
g24952.t1|BRAC-HUMAN	0.524251	0.144	0.017	1.38184e-27
g9793.t1|QCR7-MOUSE	0.316855	0.778	0.624	1.49967e-27
g22933.t1|KCNQ5-HUMAN	0.290902	0.181	0.039	2.36214e-27
g15841.t1|EF2-CHICK	-0.220316	0.971	0.977	2.66226e-27
g6320.t1|AT1A-HYDVU	0.370392	0.4	0.221	4.38559e-27
g24542.t1|RGF1C-MACFA	-0.523498	0.281	0.43	7.75194e-27
g28117.t1|CO6A6-HUMAN	0.651277	0.18	0.043	1.09994e-26
g12274.t1|FRIZ2-CAEEL	-0.581055	0.088	0.215	1.39246e-26
g25064.t1|INF2-XENLA	-0.48935	0.251	0.41	1.40728e-26
g8000.t1|LHX5-XENLA	-0.134774	0	0.044	3.33653e-26
g17917.t1|FCA1-TRYRA	0.564832	0.157	0.027	4.34585e-26
g12464.t1|TNKS-DROME	0.239577	0.142	0.019	8.11009e-26
g17905.t1|FBN3-HUMAN	0.288083	0.193	0.051	9.90703e-26
g1276.t1|HMCN1-HUMAN	0.315736	0.145	0.022	3.5833e-25
g6167.t1|PCKGM-MOUSE	0.456808	0.202	0.06	4.26808e-25
g17328.t1|PRR5-RAT	0.395193	0.318	0.148	4.89871e-25
g4003.t1|PTPR2-RAT	-0.597505	0.409	0.545	5.1685e-25
g31198.t1|UT2-MOUSE	0.232686	0.161	0.032	5.93255e-25
g14685.t1|SPY2-BOVIN	-0.8788	0.302	0.436	6.64358e-25
g24329.t1|LWA-HYDEC	-1.18015	0.168	0.313	7.96202e-25
g15614.t1|ABHDB-DANRE	0.479405	0.479	0.318	8.67701e-25
g2616.t1|Y381-RICFE	0.243314	0.172	0.038	8.8155e-25
g7994.t1|FRIH-TRENE	0.336665	0.951	0.929	2.1458e-24
g25556.t1|A30BL-HUMAN	0.162561	0.115	0.007	3.68345e-24
g12732.t1|CAR11-MOUSE	-0.311141	0.2	0.363	1.18225e-23
g20605.t1|RL17-PODCA	-0.168294	0.982	0.994	2.09273e-23
g27138.t1|NCF2-BOVIN	0.227469	0.128	0.015	2.16546e-23
g20603.t1|NRBP-MOUSE	0.238623	0.123	0.012	2.19216e-23
g1366.t1|MMP25-HUMAN	-0.31583	0.069	0.179	4.36762e-23
g1742.t1|OPN4-PHOSU	-0.0967696	0.009	0.067	5.86411e-23
g19213.t1|PLBL2-HUMAN	0.322901	0.727	0.545	1.09678e-22
g15387.t1|DMX1B-DANRE	-0.296353	0.065	0.173	1.27978e-22
g14168.t1|DAD1-ARAVE	-0.262106	0.856	0.897	6.14513e-22
g4061.t1|PRY1-YEAST	0.252064	0.105	0.006	8.9738e-22
g3304.t1|FKB12-DROME	0.205333	0.932	0.876	1.17284e-21
g10121.t1|DRD2L-DROME	-0.126973	0.013	0.077	1.18528e-21
g28700.t1|MPRG-HUMAN	0.224492	0.139	0.026	1.47042e-21
g9510.t1|PDP2-RAT	0.315196	0.262	0.114	1.89324e-21
g13247.t1|AHV-ACTSK	-0.191004	0.032	0.114	2.39415e-21
g10300.t1|B4GN4-HUMAN	0.200467	0.108	0.009	3.0567e-21
g10018.t1|COFI-GIBZE	0.162374	0.98	0.968	8.36424e-21
g1889.t1|RL26-LITLI	-0.157508	0.988	0.992	8.68796e-21
g4769.t1|ELOV5-XENTR	0.251393	0.201	0.068	1.50901e-20
g12522.t1|RL22-CAEEL	-0.15833	0.988	0.986	2.05319e-20
g32638.t1|IRF2-CHICK	0.277012	0.526	0.333	2.56416e-20
g31685.t1|CFAD-DICDI	0.383644	0.801	0.649	4.06676e-20
g20802.t1|RLA2-CRYST	-0.135291	0.988	0.993	4.42321e-20
g9693.t1|CAS4-EPHMU	0.198834	0.096	0.005	9.9325e-20
g12884.t1|MANF-BOVIN	-0.256995	0.904	0.93	2.01873e-19
g245.t1|NDRG3-BOVIN	0.241509	0.258	0.112	2.44562e-19
g13041.t1|SPEF1-XENLA	0.253646	0.136	0.029	3.05127e-19
g3221.t1|FGRL1-CHICK	0.980546	0.247	0.125	3.13854e-19
g24771.t1|KAPCA-HUMAN	-0.68433	0.498	0.578	3.37173e-19
g9269.t1|FHL2-HUMAN	-0.400193	0.339	0.478	4.1403e-19
g31477.t1|KCNAW-DROME	-0.078477	0.001	0.036	4.5827e-19
g6142.t1|TCB2-CAEBR	-0.0661946	0.001	0.036	4.90347e-19
g2834.t2|GXCDD-DICDI	0.281302	0.255	0.115	5.46131e-19
g9879.t1|MTH2-DROYA	-0.0934519	0.012	0.069	6.15376e-19
g10256.t1|CELR2-HUMAN	0.40165	0.21	0.077	6.91194e-19
g30727.t2|RTXE-DROME	0.159482	0.087	0.003	7.12073e-19
g5972.t1|GHC1-BOVIN	0.245785	0.228	0.093	7.38817e-19
g12373.t1|DIRA2-MACFA	0.322083	0.094	0.006	7.40411e-19
g11502.t1|CELR2-RAT	0.246264	0.135	0.029	8.60504e-19
g8295.t1|RL3-DROME	-0.163296	0.965	0.975	9.63729e-19
g33373.t1|WNT7B-HUMAN	0.965675	0.085	0.002	1.01549e-18
g17298.t1|KAP1-MOUSE	-0.641905	0.396	0.493	1.39447e-18
g15894.t1|DUT-RHILW	0.321289	0.246	0.11	1.44314e-18
g33731.t1|TMOD2-RAT	-0.238491	0.219	0.37	1.50444e-18
g14229.t1|GREM2-HUMAN	0.169721	0.133	0.027	1.52813e-18
g13058.t1|SODC-CAMDR	0.563128	0.374	0.221	1.94864e-18
g8639.t3|SRBS2-MOUSE	0.2858	0.265	0.121	2.02491e-18
g30066.t1|FUT3-BOVIN	-0.187919	0.016	0.076	3.53695e-18
g30572.t1|SCRY2-OCTVU	0.394741	0.526	0.385	4.55102e-18
g23011.t1|SPAT6-HUMAN	0.283361	0.193	0.071	5.40317e-18
g4922.t1|MACF1-RAT	0.30886	0.463	0.307	2.09029e-17
g23416.t1|MCL1-FELCA	0.297477	0.596	0.449	3.24447e-17
g14938.t1|AXIN1-HUMAN	0.241047	0.209	0.084	3.66266e-17
g18449.t1|PHLB2-HUMAN	-0.560495	0.397	0.486	3.67474e-17
g8319.t1|RL18-DROME	-0.133181	0.98	0.989	6.48113e-17
g12372.t1|DIRA-CAEEL	0.298892	0.251	0.114	7.9843e-17
g2036.t1|RL27-HIPCM	-0.143962	0.987	0.99	8.03975e-17
g33220.t1|CSRP2-HUMAN	-0.31114	0.381	0.508	1.44439e-16
g19454.t1|CALM5-ARATH	-0.18953	0.051	0.136	3.8198e-16
g31435.t1|NPY2R-MOUSE	-0.104725	0.055	0.145	3.88472e-16
g27891.t1|FZD4-RAT	0.282472	0.278	0.143	4.39716e-16
g30095.t1|NUCL1-ORYSJ	-0.252834	0.702	0.825	4.40279e-16
g11745.t1|MYPT1-CHICK	0.370634	0.502	0.365	8.16277e-16
g27981.t1|MGA-HUMAN	0.238141	0.439	0.271	9.0987e-16
g28229.t1|PTGR1-BOVIN	0.258616	0.785	0.721	9.30964e-16
g625.t1|RS4-ICTPU	-0.145407	0.984	0.993	1.00356e-15
g31352.t1|RECK-MOUSE	-0.218926	0.192	0.329	1.22818e-15
g1275.t1|PROP-HUMAN	0.193333	0.115	0.025	1.46859e-15
g2110.t1|RL23-DROME	-0.128768	0.983	0.99	1.93981e-15
g31657.t1|INT3-MOUSE	0.227079	0.311	0.174	1.97839e-15
g25169.t1|RL12-RAT	-0.152524	0.97	0.981	3.34309e-15
g17348.t1|MOM5-CAEEL	-0.134648	0.037	0.11	5.9606e-15
g5995.t1|MKNK1-MOUSE	0.181992	0.13	0.035	6.4361e-15
g29473.t1|RHCG-CHICK	0.434894	0.19	0.079	7.66946e-15
g26902.t1|NOTUM-MOUSE	0.211334	0.101	0.018	8.62522e-15
g1973.t2|KI26A-MOUSE	0.330711	0.269	0.142	9.27334e-15
g29383.t1|OPSO-RUTRU	0.170201	0.107	0.021	1.09804e-14
g16299.t1|ST1B1-MOUSE	0.229892	0.243	0.119	1.74617e-14
g3755.t1|G3ST3-MOUSE	0.142867	0.102	0.019	1.78975e-14
g29487.t1|ABR-BOVIN	0.28119	0.315	0.18	1.82025e-14
g8337.t1|GILT-HUMAN	0.419471	0.134	0.042	2.02769e-14
g5224.t1|ADRB2-BOVIN	0.154996	0.077	0.005	2.14929e-14
g22300.t2|RASLC-DANRE	0.12619	0.072	0.004	3.67761e-14
g29266.t1|ADCY9-MOUSE	-0.304537	0.141	0.244	3.75567e-14
g12567.t1|SOX2-CHICK	0.25858	0.091	0.013	3.83302e-14
g29099.t1|FP-ACRMI	0.225315	0.261	0.134	4.10748e-14
g16569.t1|SNRK-HUMAN	0.229042	0.193	0.082	6.36127e-14
g23188.t1|S6A13-RAT	0.199411	0.154	0.053	6.55835e-14
g12466.t1|LMIP-RAT	0.51645	0.143	0.048	7.24935e-14
g16040.t1|PDE2A-BOVIN	0.164256	0.151	0.051	9.27009e-14
g7863.t1|TAXB1-RAT	0.276628	0.573	0.449	1.48187e-13
g8333.t1|ANPRA-MOUSE	0.146727	0.084	0.011	1.91076e-13
g6141.t1|Y381-RICFE	-0.099365	0.015	0.066	1.92306e-13
g11575.t2|CHDH-MOUSE	-0.140335	0.051	0.128	4.05309e-13
g15390.t1|ORNT1-HUMAN	0.249731	0.273	0.151	5.42638e-13
g3893.t1|ASPGB-ARATH	-0.543172	0.201	0.304	1.41747e-12
g27219.t1|SMTN-HUMAN	0.244787	0.145	0.052	1.45526e-12
g12059.t1|RL15-NEUCR	-0.158039	0.964	0.978	1.80945e-12
g7938.t1|MOT14-HUMAN	0.433117	0.096	0.021	1.86619e-12
g23270.t1|FSHR-CAIMO	0.149153	0.085	0.013	2.11873e-12
g9091.t1|RIMK-SYNPX	0.196713	0.162	0.064	2.12944e-12
g20388.t1|ETHE1-ARATH	0.257544	0.331	0.203	3.89578e-12
g12223.t1|MYLIP-RAT	0.329125	0.412	0.295	5.89308e-12
g5882.t1|SAL-SILAS	-0.562714	0.356	0.447	1.61598e-11
g20349.t1|Y2028-MYCBO	0.282949	0.609	0.492	1.99933e-11
g27863.t1|OX2R-PIG	-0.0721645	0.007	0.043	2.07136e-11
g16432.t1|ATS20-MOUSE	0.155135	0.072	0.009	2.21875e-11
g21120.t2|RB6I2-MOUSE	0.245059	0.438	0.306	2.23734e-11
g13698.t1|OPN4A-GADMO	-0.113125	0.076	0.162	2.33442e-11
g456.t1|HD-MOUSE	-0.182955	0.051	0.121	2.96114e-11
g32297.t1|QPCTL-BOVIN	-0.29219	0.174	0.274	3.01063e-11
g87.t1|GFPT2-RAT	0.602216	0.498	0.43	3.0743e-11
g16698.t1|BRAC-CHICK	0.240223	0.067	0.006	3.26489e-11
g24040.t1|RL28-MOUSE	-0.166947	0.977	0.974	5.215e-11
g13212.t1|TLL2-HUMAN	0.362513	0.246	0.14	5.22847e-11
g3553.t1|PHNX-SYNFM	0.769453	0.36	0.261	5.81179e-11
g10536.t1|MITF-MOUSE	0.218315	0.366	0.24	8.35997e-11
g17315.t1|AGUA-LACSS	0.146998	0.097	0.025	9.09337e-11
g23620.t1|G3ST3-MOUSE	-0.279223	0.081	0.159	1.30713e-10
g18478.t1|DHSD-MOUSE	0.199676	0.792	0.707	1.34123e-10
g11301.t1|ASIC1-OPSTA	0.0894238	0.053	0.001	1.66537e-10
g14723.t1|CML25-ARATH	-0.466524	0.124	0.21	1.70934e-10
g2830.t1|WHITE-DROME	0.215816	0.22	0.114	1.81605e-10
g14267.t1|GRHL1-MOUSE	0.201431	0.273	0.159	2.00931e-10
g23436.t1|S2611-BOVIN	-0.105629	0.019	0.067	2.0785e-10
g23875.t1|TM11B-MOUSE	0.445871	0.177	0.084	2.3865e-10
g22677.t2|CNTN4-RAT	0.183796	0.272	0.159	2.44262e-10
g30409.t1|CASR-RAT	-0.0831664	0.012	0.052	2.50618e-10
g14403.t1|ZCH10-MOUSE	0.560104	0.616	0.523	2.58083e-10
g25356.t1|FBN1-HUMAN	-0.192955	0.078	0.156	5.49846e-10
g5933.t1|PH4H-DROME	0.105404	0.077	0.014	5.78567e-10
g19036.t1|RS15A-RAT	-0.14482	0.943	0.966	7.06114e-10
g2196.t1|RS18-BRABE	-0.111076	0.986	0.991	7.21144e-10
g11287.t2|DCX-MOUSE	-0.07784	0.006	0.039	9.83888e-10
g10959.t1|GAPR1-MOUSE	-0.0653036	0.004	0.032	1.00155e-09
g2192.t1|LMX1A-HUMAN	-0.111371	0.029	0.083	1.1215e-09
g19961.t1|RLA1-DROME	-0.116205	0.972	0.984	1.44458e-09
g28899.t1|COASY-HUMAN	0.202554	0.4	0.278	1.89947e-09
g14402.t1|S2536-DANRE	0.180721	0.123	0.045	2.2433e-09
g4679.t1|RIMK-SYNPX	0.159346	0.239	0.133	2.81219e-09
g17202.t1|TRAF5-MOUSE	0.302048	0.442	0.317	3.24921e-09
g25119.t1|PP2C2-CAEEL	0.122708	0.173	0.081	5.31981e-09
g929.t1|STOX1-HUMAN	0.160836	0.159	0.073	6.61642e-09
g4995.t1|GBRB3-RAT	0.151639	0.115	0.041	6.92594e-09
g24866.t1|DYRK2-MOUSE	0.182797	0.429	0.309	8.9884e-09
g4599.t1|DCC-HUMAN	0.171268	0.176	0.086	1.04269e-08
g5619.t1|VATL-RAT	0.13568	0.968	0.971	1.07096e-08
g30594.t1|PDI2-CAEEL	-0.255867	0.674	0.733	1.31919e-08
g6116.t1|NALP7-HUMAN	0.0706287	0.051	0.004	1.58649e-08
g10230.t1|ZAN-HUMAN	0.0847113	0.073	0.015	2.32092e-08
g32582.t1|SHRM4-MOUSE	-0.286449	0.429	0.518	3.05603e-08
g14919.t1|RS9-RAT	-0.102732	0.978	0.989	3.70777e-08
g22317.t1|RERG-BOVIN	-0.384083	0.203	0.286	3.92893e-08
g26884.t1|MCTP1-HUMAN	-0.268939	0.346	0.44	4.35308e-08
g24810.t3|FCHO2-DANRE	0.166951	0.292	0.185	4.89101e-08
g31434.t1|OPSD1-MIZYE	-0.101349	0.054	0.117	5.29696e-08
g1520.t1|ABCA1-HUMAN	0.0817288	0.066	0.012	5.43632e-08
g11444.t1|ZSWM4-HUMAN	0.165414	0.157	0.074	7.04502e-08
g10543.t1|RL10A-RAT	-0.161272	0.927	0.953	7.05984e-08
g3641.t3|DMD-CHICK	-0.279387	0.158	0.242	7.75399e-08
g1513.t1|RS14-PODCA	-0.116874	0.964	0.981	8.26424e-08
g18872.t2|RHG07-BOVIN	0.201658	0.456	0.338	8.49038e-08
g27993.t1|ATP5J-RAT	0.156608	0.795	0.729	9.91743e-08
g21580.t1|SDHB-CHICK	0.180673	0.685	0.593	1.23403e-07
g24667.t1|FAXC-MOUSE	-0.142724	0.873	0.916	1.68717e-07
g9520.t1|PLST-HUMAN	0.158609	0.309	0.203	1.79576e-07
g3773.t1|DD3-DICDI	0.0828526	0.041	0.001	2.5328e-07
g9247.t1|NECX-APLCA	0.105263	0.063	0.012	2.71792e-07
g30305.t1|NPC2-DROME	0.562559	0.383	0.306	2.79479e-07
g14525.t1|TTC28-HUMAN	0.220219	0.18	0.097	3.65971e-07
g29956.t1|ITB1-SHEEP	0.158919	0.346	0.244	4.49192e-07
g7810.t1|KCNA2-ONCMY	0.0844738	0.064	0.013	5.62877e-07
g7129.t1|VIAAT-XENLA	0.131527	0.102	0.038	5.78243e-07
g22325.t1|RL44-CANTR	-0.104602	0.982	0.989	5.78685e-07
g15582.t1|WNT11-XENLA	0.223285	0.057	0.01	8.03781e-07
g7395.t1|SPTB2-MOUSE	0.165303	0.237	0.143	8.08254e-07
g32930.t2|ACT-ASPOR	0.0789728	0.074	0.019	8.23657e-07
g18074.t1|MRCKA-MOUSE	0.171214	0.441	0.333	8.84418e-07
g23080.t1|CIP4-DANRE	0.133921	0.345	0.234	9.00836e-07
g20342.t1|G3P2-DANRE	0.133176	0.888	0.822	9.029e-07
g196.t1|RLA0-DANRE	-0.111581	0.977	0.989	1.117e-06
g21559.t1|PFD2-HUMAN	0.189064	0.588	0.481	1.16133e-06
g29124.t1|SH3K1-HUMAN	0.16079	0.582	0.473	1.1653e-06
g17842.t1|CP17A-CHICK	-0.12101	0.044	0.098	1.44794e-06
g11736.t1|NOT2-XENLA	0.0949444	0.048	0.005	1.45769e-06
g33714.t2|RHG20-HUMAN	0.184186	0.231	0.141	1.65204e-06
g29670.t1|ENPL-BOVIN	-0.177007	0.796	0.862	1.82478e-06
g14428.t1|ACK1-BOVIN	-0.0802374	0.012	0.044	1.82683e-06
g21899.t1|RL27A-XENLA	-0.107166	0.981	0.988	2.04013e-06
g27996.t1|RS25-BRABE	-0.0946522	0.987	0.994	2.32828e-06
g8395.t1|RS23-ICTPU	-0.0935608	0.987	0.998	2.78427e-06
g14572.t1|AMT3-CAEEL	-0.107245	0.973	0.988	2.87707e-06
g14795.t1|TSP4B-DANRE	0.30112	0.119	0.054	3.10779e-06
g13083.t1|INHBB-RAT	-0.151697	0.041	0.091	3.57778e-06
g24936.t1|PSD10-DICDI	0.146749	0.157	0.08	3.64007e-06
g24961.t1|S39AD-DANRE	-0.216354	0.36	0.454	3.64267e-06
g24690.t1|RS10-SPOFR	-0.146245	0.906	0.934	5.19473e-06
g14550.t1|CTRO-HUMAN	0.172438	0.211	0.127	5.33897e-06
g28606.t1|ATF4-MOUSE	0.288871	0.838	0.783	5.74526e-06
g12598.t1|RL31-CYAPA	-0.137971	0.962	0.966	7.33937e-06
g31380.t1|LMBD1-NEMVE	0.16069	0.316	0.218	7.38642e-06
g8550.t1|ASIC3-HUMAN	-0.155706	0.077	0.138	9.41676e-06
g33693.t1|LBP-HUMAN	0.188331	0.082	0.028	1.08211e-05
g7829.t1|PTHB1-XENLA	0.0991916	0.128	0.06	1.38545e-05
g18366.t1|SERIC-NEMVE	0.14248	0.202	0.119	1.43544e-05
g30298.t1|AGRIN-CHICK	-0.357313	0.357	0.424	1.59078e-05
g23268.t1|PKHG5-HUMAN	0.171198	0.299	0.202	1.90818e-05
g9166.t1|CAH2-TRIHK	0.108619	0.129	0.062	2.12022e-05
g10519.t1|PRIC2-HUMAN	-0.254203	0.448	0.505	2.34307e-05
g2137.t1|NPYR-DROME	-0.103969	0.053	0.105	2.94124e-05
g18842.t1|WLS-MOUSE	0.109993	0.111	0.05	3.06995e-05
g11408.t1|GIPC1-RAT	0.0962616	0.097	0.04	3.26629e-05
g29969.t1|ACER3-HUMAN	0.0951612	0.152	0.08	3.41723e-05
g21831.t1|RL6-CHILA	-0.110255	0.956	0.969	3.44959e-05
g15133.t1|PRRT1-RAT	0.164011	0.551	0.451	3.53015e-05
g7319.t1|GRM5-HUMAN	0.0571049	0.054	0.012	3.70112e-05
g11497.t1|TES-XENLA	0.198743	0.184	0.109	4.33991e-05
g5380.t1|BI1-PAROL	0.131256	0.821	0.779	4.39864e-05
g15242.t1|GALR2-RAT	-0.0891156	0.018	0.051	4.43644e-05
g6635.t1|ZER1-HUMAN	0.0815506	0.069	0.021	4.48342e-05
g15359.t1|ZIC3-HUMAN	0.379257	0.153	0.089	4.56894e-05
g3528.t1|GBLP-HYDVU	-0.126234	0.819	0.875	4.95502e-05
g22585.t1|DUS7-MOUSE	0.210078	0.606	0.531	5.40283e-05
g18807.t1|RL37A-YEAST	-0.127044	0.936	0.952	7.69453e-05
g18935.t1|5HT1F-RAT	0.180242	0.061	0.017	7.70858e-05
g7262.t1|CTNB-URECA	0.167388	0.416	0.322	7.84247e-05
g32981.t1|RL7-CHICK	-0.0873333	0.986	0.994	7.9676e-05
g12461.t1|SURF4-DROME	-0.228784	0.48	0.553	8.19303e-05
g3053.t2|SVIL-HUMAN	0.210589	0.281	0.196	8.67113e-05
g28459.t1|GCY-ARBPU	-0.0560037	0.004	0.025	9.22106e-05
g15457.t1|ATX3-RAT	0.152909	0.198	0.121	0.000122578
g29921.t2|ZFYV9-HUMAN	0.193482	0.383	0.288	0.000123823
g24983.t1|ZBED4-HUMAN	0.18512	0.137	0.073	0.000137771
g22716.t1|RL35A-PONAB	-0.182727	0.779	0.808	0.000137806
g24589.t1|GNAQ-MIZYE	0.180803	0.461	0.368	0.000142381
g10687.t1|ACADM-BOVIN	0.146271	0.483	0.379	0.000143176
g32361.t2|OAZ2-MOUSE	0.182066	0.365	0.27	0.000170446
g15241.t1|GALR2-HUMAN	-0.193449	0.123	0.189	0.000184091
g22426.t1|LASP1-PONAB	0.153648	0.768	0.687	0.000251597
g24822.t1|CALR-RABIT	-0.142157	0.992	0.999	0.000311269
g30573.t1|HLDE-SHESA	0.0885533	0.076	0.028	0.0003139
g31234.t1|PTPRD-HUMAN	0.140402	0.119	0.06	0.000376404
g11780.t1|SP4-MOUSE	-0.117803	0.038	0.08	0.000389827
g18302.t1|GRM8-HUMAN	0.111036	0.197	0.121	0.000395077
g11471.t1|CALM-PLAFA	0.37037	0.225	0.155	0.000401248
g23847.t1|CYTSA-XENTR	0.144224	0.284	0.198	0.000416122
g12077.t1|UBR4-HUMAN	0.40513	0.34	0.275	0.000427983
g20074.t1|INO1B-XENLA	0.164233	0.841	0.767	0.000430646
g27977.t1|HS12A-HUMAN	-0.304801	0.434	0.482	0.000443448
g28121.t1|MYLIP-HUMAN	0.142647	0.348	0.258	0.000446276
g20640.t1|HTK7-HYDVU	0.0994662	0.227	0.146	0.00052106
g29450.t1|USPAL-ARATH	0.09561	0.19	0.116	0.000567455
g24934.t1|ANR27-HUMAN	0.101926	0.11	0.053	0.000571466
g8394.t1|FBX8-MOUSE	0.139543	0.175	0.106	0.000580155
g31704.t1|TM175-DANRE	-0.0850517	0.052	0.1	0.000582706
g10912.t1|BCAT-NEMVE	-0.123297	0.052	0.098	0.000607306
g4335.t1|CATL-DROME	0.276198	0.565	0.492	0.000665691
g10483.t1|OPN4-PHOSU	0.144904	0.055	0.016	0.000670447
g22314.t1|NPAL2-HUMAN	0.0773447	0.142	0.078	0.000709769
g12840.t1|RHCG-ONCMY	0.078044	0.051	0.013	0.000733446
g27825.t1|NLP-DROME	-0.132341	0.722	0.786	0.000771051
g24237.t1|CATB-RAT	0.17564	0.878	0.787	0.000872402
g3804.t1|YUGO-BACSU	0.0953647	0.062	0.02	0.000899138
g19264.t1|MNB-DROME	0.135178	0.225	0.148	0.000942895
g240.t1|THTM-HUMAN	0.0865983	0.248	0.167	0.000954598
g25677.t1|AGRL3-RAT	-0.0316109	0.019	0.05	0.00100229
g14018.t1|POSTN-HUMAN	-0.0578587	0.023	0.056	0.00122931
g1532.t1|ABCA2-HUMAN	0.0371844	0.034	0.004	0.00141325
g5621.t1|PITX1-XENLA	0.059734	0.031	0.003	0.0014955
g1610.t1|CAH7-MOUSE	0.0627614	0.027	0.001	0.00179447
g14427.t1|TRAK1-HUMAN	0.130084	0.316	0.231	0.00181539
g7895.t1|CTRC-MOUSE	0.290095	0.442	0.349	0.00183288
g19502.t1|SNX17-DANRE	0.123502	0.315	0.231	0.00192136
g13228.t2|CBPA2-RAT	0.21838	0.085	0.038	0.00192185
g13224.t1|HTSF1-MOUSE	0.116876	0.307	0.224	0.00195099
g19196.t1|PROD-DROME	0.171654	0.069	0.027	0.00202763
g5525.t1|ERG-HUMAN	0.0493017	0.028	0.002	0.00211715
g8784.t1|MOT10-DANRE	0.147532	0.106	0.054	0.00217032
g33771.t1|GRM3-PONAB	0.066098	0.028	0.002	0.00248639
g16168.t1|GRP78-CHICK	-0.219322	0.83	0.879	0.00252925
g10239.t1|LTBP1-MOUSE	0.0591856	0.05	0.014	0.00265602
g14794.t1|ACHA3-CHICK	0.0976702	0.243	0.162	0.00272581
g4606.t1|PJVK-HUMAN	0.112494	0.292	0.209	0.00273197
g14801.t1|ZBED4-MOUSE	-0.131447	0.051	0.096	0.00283677
g24094.t1|WNT1-DANRE	0.150022	0.024	0	0.00346042
g7977.t1|MMP24-MOUSE	0.545326	0.448	0.403	0.00386734
g7609.t1|CATL-DROME	0.349615	0.413	0.352	0.00408617
g3653.t1|HOW-DROME	0.20375	0.375	0.29	0.00484128
g27164.t1|FLNA-HUMAN	0.160032	0.292	0.213	0.00498642
g18436.t1|RENR-RAT	0.123307	0.395	0.308	0.00500091
g21613.t1|CHMP5-RAT	0.12184	0.373	0.288	0.00555172
g28647.t1|ARMC4-HUMAN	0.0429297	0.028	0.003	0.0062246
g18917.t2|PTPRO-HUMAN	0.0509509	0.066	0.026	0.00780004
g16426.t1|GRAM4-XENLA	0.0801379	0.246	0.172	0.00836458
g13590.t1|GRLQ-DICDI	-0.0609314	0.031	0.066	0.00871467
g26784.t1|VMPA3-LOXIN	-0.115513	0.03	0.064	0.00906109
g7533.t1|LGMN-MACFA	0.327573	0.318	0.256	0.00929893
g6732.t1|SECG-DICDI	0.0409907	0.022	0	0.00969138
g29038.t1|RBL1-HUMAN	0.0674036	0.049	0.015	0.0102271
g12048.t1|RS11-RAT	-0.0719625	0.986	0.99	0.0105437
g29456.t1|I5P1-HUMAN	0.0718796	0.132	0.075	0.0106842
g31877.t1|ASI4A-DANRE	-0.0312902	0.007	0.027	0.0111964
g12710.t1|RAB12-MOUSE	0.122974	0.641	0.538	0.0112464
g3604.t2|PDE4D-MOUSE	-0.0359709	0.002	0.014	0.0117049
g29234.t2|SH3R1-XENLA	0.116801	0.227	0.153	0.0117557
g10580.t1|YAP1-ORYLA	0.124744	0.136	0.08	0.0126004
g20654.t1|ECT-ACRMI	0.124536	0.153	0.094	0.0139429
g31268.t1|5NTD-MOUSE	0.235174	0.225	0.164	0.0141201
g26107.t1|SYT15-HUMAN	-0.071867	0.075	0.125	0.01453
g2140.t1|EGR1-XENTR	0.101716	0.941	0.92	0.0151384
g4334.t1|CATL-DROME	0.244541	0.488	0.412	0.0170489
g22100.t1|DESI1-RAT	0.0584778	0.117	0.064	0.0178182
g24679.t1|VIPB-SALTI	0.0803536	0.279	0.197	0.0199563
g25412.t2|NOTC1-DANRE	0.149787	0.474	0.388	0.0200073
g7196.t1|NDK-CHICK	-0.0859643	0.966	0.979	0.0211861
g24313.t1|GRM3-MOUSE	0.0323114	0.02	0	0.0220929
g11728.t1|RS13-XENLA	-0.0850681	0.967	0.974	0.0236077
g1718.t1|CHSTB-RAT	0.219396	0.436	0.355	0.0278164
g29976.t1|SPIR2-HUMAN	-0.315084	0.407	0.446	0.028037
g18951.t1|LICH-HUMAN	0.237563	0.258	0.192	0.0287842
g32362.t1|M3K9-MOUSE	0.0734655	0.165	0.105	0.030265
g24445.t1|MICA1-DANRE	-0.22921	0.136	0.187	0.0311642
g3409.t1|DIRA-CAEEL	-0.3981	0.264	0.31	0.0327784
g15911.t1|MIC27-BOVIN	0.0849273	0.267	0.194	0.0333253
g14866.t1|NPYR-DROME	-0.0514334	0.014	0.038	0.0344506
g11511.t1|GTR3-CHICK	-0.0922774	0.049	0.089	0.0347152
g21354.t1|A2MG-PONAB	-0.0530788	0.194	0.268	0.0356417
g27341.t1|STK25-MOUSE	0.0705231	0.275	0.201	0.0363178
g31869.t1|AA2BR-CHICK	-0.0191796	0.002	0.013	0.0391858
g24126.t1|FOXA2-ORYLA	0.134777	0.068	0.03	0.0395189
g3921.t1|FLNA-MOUSE	0.131236	0.759	0.69	0.0404132
g16204.t1|HMCN1-MOUSE	-0.248408	0.388	0.433	0.0412892
g4304.t1|ACVR1-HUMAN	0.0934092	0.147	0.091	0.0422651
g9815.t1|PDE11-MOUSE	-0.2953	0.235	0.287	0.0466636
g17181.t1|TM175-DANRE	0.0361403	0.028	0.004	0.0503947
g3419.t1|GNA1-DROME	-0.151517	0.114	0.164	0.0526502
g27008.t1|ASAH1-MOUSE	-0.051254	0.016	0.04	0.0543468
g14540.t1|PGDH-CAVPO	0.136191	0.418	0.342	0.0547351
g27170.t1|GMPPB-XENTR	0.0789158	0.3	0.22	0.0551695
g24867.t1|UBE2N-PONAB	0.0843847	0.654	0.572	0.0580086
g31094.t2|N42L1-MOUSE	0.115051	0.221	0.156	0.0585292
g20636.t1|NDUS7-BOVIN	0.123753	0.499	0.421	0.0663827
g3756.t1|AMERL-PONAB	0.0771362	0.111	0.063	0.0697146
g23029.t1|ABH15-MOUSE	-0.174391	0.09	0.135	0.0712982
g21088.t1|AT2B3-HUMAN	0.0203325	0.245	0.173	0.0720513
g12447.t1|ELK1-RAT	-0.206787	0.343	0.403	0.0731698
g31723.t1|SSRA-HUMAN	-0.196235	0.451	0.5	0.073398
g7494.t1|RADI-BOVIN	-0.0916995	0.934	0.924	0.0773788
g20083.t1|CP17A-RANDY	-0.0400152	0.001	0.01	0.0782692
g28615.t1|HGS-BOVIN	0.127973	0.313	0.243	0.0791597
g7626.t1|CALM-MACPY	0.132287	0.11	0.064	0.0838888
g15451.t1|FSHR-HORSE	-0.0378777	0.016	0.04	0.095121
g24294.t1|TEST-MOUSE	-0.0745202	0.248	0.328	0.0954942
g12232.t1|GCYA2-HUMAN	0.140802	0.135	0.085	0.0975548
g594.t1|MMSA-ARATH	0.121953	0.311	0.237	0.0985357
g948.t1|SC24C-HUMAN	-0.265011	0.327	0.376	0.109335
g21201.t1|CSDC2-RAT	0.122366	0.573	0.481	0.11256
g20416.t1|GFI1B-CHICK	0.0420664	0.102	0.056	0.114935
g8603.t1|PKHG7-HUMAN	-0.0590611	0.133	0.193	0.121363
g13814.t1|MCF2L-RAT	-0.285929	0.273	0.322	0.133831
g2385.t1|RPGP2-HUMAN	-0.184189	0.263	0.321	0.150439
g24768.t1|HMCN1-MOUSE	-0.119188	0.048	0.083	0.162493
g6292.t1|FKB2B-RHIO9	-0.168565	0.121	0.169	0.16635
g14799.t1|ACOT1-HUMAN	-0.0287684	0.006	0.021	0.168522
g30702.t1|NDUS5-MACFA	0.109553	0.535	0.453	0.169187
g6847.t1|ARLY-RAT	0.0766194	0.181	0.121	0.170193
g25532.t1|RECK-HUMAN	-0.0526146	0.037	0.069	0.171114
g24972.t1|DCL1-COCIM	0.0812404	0.12	0.074	0.221815
g32341.t1|ENAH-HUMAN	0.109696	0.322	0.252	0.222795
g20401.t1|PCS3-LOTJA	0.130314	0.333	0.267	0.223335
g2575.t1|NR1AA-DANRE	0.0680862	0.264	0.195	0.248848
g18200.t1|RIT2-HUMAN	-0.170932	0.413	0.464	0.248982
g29410.t1|ADRB2-MESAU	0.0555532	0.029	0.006	0.254079
g30605.t1|CHST3-CHICK	0.031633	0.032	0.008	0.257394
g6880.t1|DLL1-XENLA	-0.291508	0.293	0.332	0.322715
g23694.t1|FRMD5-MOUSE	0.0245186	0.016	0	0.322909
g5534.t1|TCMO-STRGA	0.0556567	0.057	0.025	0.33164
g18852.t1|SHOC2-NEMVE	0.0947991	0.213	0.154	0.340077
g9063.t1|FLVC2-HUMAN	-0.0811457	0.081	0.124	0.346147
g22798.t1|TU92-POLAB	-0.371213	0.356	0.381	0.346162
g7574.t1|AGRG2-RAT	-0.0130322	0.001	0.01	0.371813
g4608.t1|ABCBA-HUMAN	0.079498	0.469	0.389	0.392621
g17042.t1|AGRG4-HUMAN	0.0303466	0.019	0.002	0.426431
g29481.t1|LENG9-MOUSE	0.0657618	0.167	0.114	0.438354
g9543.t1|MPDZ-RAT	0.0891581	0.082	0.044	0.455571
g4001.t1|RL37A-CRYST	-0.0913294	0.957	0.958	0.470194
g8146.t1|TEP1-HUMAN	0.0533765	0.235	0.169	0.485356
g8393.t1|SND1-BOVIN	-0.206508	0.488	0.534	0.486949
g15698.t1|CCD47-PONAB	0.114504	0.534	0.464	0.50454
g33.t2|M4K5-MOUSE	0.0372884	0.071	0.035	0.520666
g17619.t1|ZIFL1-ARATH	0.0730956	0.03	0.008	0.524421
g13730.t1|NCAH-DROME	0.0642575	0.142	0.091	0.526322
g5090.t1|VWDE-MOUSE	-0.0264307	0.005	0.019	0.543273
g10022.t1|UBL7-MOUSE	0.0820193	0.124	0.078	0.58853
g20504.t1|LIN41-CHICK	0.0722282	0.211	0.153	0.694167
g4036.t1|SER2-CAEEL	0.0625138	0.045	0.018	0.698287
g21883.t1|GRP75-BOVIN	-0.114112	0.493	0.554	0.732082
g29819.t1|UB2E3-MOUSE	0.0275451	0.077	0.041	0.739868
g15906.t1|ETFA-HUMAN	0.0714247	0.223	0.164	0.742109
g421.t1|RS7-RAT	-0.0817632	0.929	0.935	0.80734
g24628.t1|M3K4-HUMAN	0.104769	0.391	0.324	0.809157
g15173.t1|NGB-DISMA	-0.0319971	0.003	0.014	0.832724
g26886.t1|RPGR-MOUSE	0.188436	0.9	0.883	0.906924
g10540.t1|RS3-PIG	-0.0953786	0.912	0.921	0.930783
g14472.t1|NUDT9-MOUSE	0.0434861	0.02	0.003	0.978053
g23134.t1|S2551-RAT	0.0302988	0.052	0.023	1
g10047.t1|RL21A-SCHPO	-0.111846	0.811	0.826	1
g23930.t2|SPD2B-MOUSE	-0.190603	0.116	0.157	1
g27409.t1|MIB1-XENLA	-0.143888	0.076	0.112	1
g4324.t1|ARF-CANAL	-0.107891	0.129	0.173	1
g949.t1|PKD2-BOVIN	0.158722	0.32	0.263	1
g19306.t1|ETV6-MOUSE	-0.023123	0.001	0.009	1
g22555.t1|LAMB1-HUMAN	0.267876	0.323	0.273	1
g20989.t1|SCRY4-ENTDO	-0.520862	0.516	0.477	1
g8541.t1|RAE2-MOUSE	0.10804	0.204	0.151	1
g5519.t1|MRP1-CHICK	0.179871	0.166	0.121	1
g10296.t1|TIMP3-SCYTO	0.00926616	0.031	0.01	1
g16544.t1|CSN6-BOVIN	0.0465094	0.317	0.25	1
g11395.t1|GPC6-MOUSE	-0.185644	0.595	0.627	1
g31592.t2|NRX3A-HUMAN	0.0280564	0.154	0.103	1
g7216.t1|RHG23-HUMAN	-0.122411	0.232	0.287	1
g16211.t1|RL18A-DANRE	-0.101999	0.927	0.93	1
g4299.t1|MALT1-HUMAN	0.0603917	0.136	0.09	1
g28828.t1	-0.131064	0.192	0.241	1
g20700.t1|ARRD3-MOUSE	0.0481845	0.175	0.123	1
g31875.t1|APC4-MOUSE	0.0492849	0.039	0.015	1
g33059.t1|AVR2A-BOVIN	0.135369	0.416	0.356	1
g21123.t1|AT2B3-HUMAN	0.0666506	0.317	0.25	1
g30334.t1|MUC5A-HUMAN	0.030759	0.032	0.011	1
g8942.t1|RHBT1-HUMAN	0.0434374	0.16	0.111	1
g5542.t1|RL402-TRYCR	-0.0791313	0.974	0.971	1
g23284.t1|CACB2-RABIT	0.191316	0.389	0.332	1
g32278.t1|NOVA1-MACFA	0.102087	0.573	0.507	1
g21084.t1|MUC6-HUMAN	0.1054	0.38	0.31	1
g10299.t1|TIMP3-HORSE	0.00976148	0.029	0.009	1
g22571.t1|NAPEP-BOVIN	0.112523	0.928	0.938	1
g5926.t1|ZFP26-MOUSE	0.0776937	0.237	0.181	1
g32882.t1|GRM8-HUMAN	-0.030681	0.02	0.042	1
g21408.t1|LCAP-MOUSE	0.0564413	0.098	0.06	1
g3262.t1|PRRT1-RAT	-0.0697574	0.132	0.181	1
g21076.t2|KIBRA-XENTR	0.0843889	0.165	0.117	1
g11274.t1|LRC59-HUMAN	0.11668	0.33	0.271	1
g2112.t1|ICEF1-RAT	0.242995	0.357	0.303	1
g3448.t1|SPRTN-XENTR	0.0852621	0.163	0.116	1
g26798.t1|OXIR-STRLI	-0.0259923	0.01	0.025	1
g31447.t1|LRC26-MOUSE	0.0444666	0.101	0.063	1
g25771.t1|ANTA-HYDVU	0.108113	0.035	0.013	1
g33466.t1|CFA70-MACFA	-0.0519871	0.027	0.05	1
g17880.t1|SPY2-MACFA	-0.0497672	0.493	0.562	1
g16372.t1|EMAL6-HUMAN	0.0129468	0.056	0.027	1
g1215.t1|KMT2E-HUMAN	0.0117208	0.188	0.135	1
g24337.t1|KBP-CHICK	0.0632039	0.2	0.148	1
g24997.t1|CNNM2-RAT	0.199644	0.177	0.13	1
g28009.t1|UBS3A-DROME	0.0400282	0.248	0.188	1
g31242.t1|NADA-APLCA	0.159163	0.148	0.106	1
g26777.t1|CN159-MOUSE	0.0165985	0.014	0.001	1
g31408.t1|BCAP-HUMAN	0.0958576	0.072	0.042	1
g25033.t1|PGDH-BOVIN	-0.041449	0.034	0.059	1
g15148.t1|OST48-PONAB	-0.162669	0.58	0.603	1
g13962.t1|GRASP-MOUSE	0.0935499	0.073	0.042	1
g12098.t1|ADAM8-MOUSE	-0.0132241	0.006	0.019	1
g17641.t1|ANK1-HUMAN	0.0558754	0.095	0.059	1
g16071.t1|ALA7-ARATH	0.068956	0.302	0.243	1
g18017.t1|FUT5-HUMAN	0.0516563	0.165	0.118	1
g19870.t1|CALM-SOLLC	0.032326	0.017	0.003	1
g9138.t1|BAT1-MOUSE	0.0266431	0.046	0.021	1
g23296.t1|DLX1-MOUSE	-0.168411	0.279	0.322	1
g15171.t1|NGB1-ONCMY	-0.0174455	0.005	0.016	1
g10594.t1|XBP1-MOUSE	0.10339	0.668	0.612	1
g11569.t1|FAT4-MOUSE	0.0225816	0.015	0.002	1
g4818.t1|TM135-HUMAN	0.0261211	0.061	0.033	1
g19918.t1|RL32-RAT	-0.0487607	0.983	0.981	1
g1450.t1|JUN-CHICK	-0.108714	0.863	0.862	1
g26917.t1|AHNK-HUMAN	0.0391345	0.068	0.038	1
g15629.t1|TNR16-CHICK	0.0931493	0.422	0.364	1
g17588.t1|RIT1-MOUSE	-0.0762814	0.143	0.19	1
g32495.t1|ADRB2-MACMU	0.0182765	0.013	0.001	1
g29415.t1|AA2AR-CANLF	-0.00579339	0.113	0.073	1
g29299.t1|LMAN1-MOUSE	0.0744224	0.162	0.119	1
g23730.t1|TMEDA-RABIT	-0.203444	0.347	0.385	1
g18292.t1|RT33-MOUSE	0.106009	0.252	0.201	1
g4618.t1|ZNF84-HUMAN	0.0258522	0.044	0.02	1
g23252.t1|CRCM-HUMAN	0.0527263	0.133	0.093	1
g269.t1|TTC9C-MACFA	0.046432	0.14	0.098	1
g11950.t1|SIK2-MOUSE	0.0556975	0.248	0.196	1
g17902.t1|RL35A-ICTPU	-0.0843611	0.086	0.12	1
g30478.t1|SMAD4-PIG	0.0310624	0.03	0.012	1
g19034.t1|MIRO1-DANRE	0.0306599	0.065	0.037	1
g5403.t1|B4GN4-HUMAN	0.0097251	0.4	0.327	1
g24841.t1|ANK1-MOUSE	-0.0240863	0	0.005	1
g27456.t1|RAP1-CAEEL	-0.130655	0.805	0.827	1
g3774.t1|DD3-DICDI	0.0212636	0.01	0	1
g18824.t1|RAP1-CAEEL	0.0396848	0.106	0.07	1
g6399.t1|LAR1B-HUMAN	-0.120426	0.351	0.399	1
g6417.t1|NALD2-MOUSE	0.0276999	0.098	0.063	1
g1457.t1|RN19A-HUMAN	0.0992731	0.403	0.353	1
g1519.t1|KTNA1-STRPU	0.0563595	0.199	0.152	1
g27364.t1|PANG1-DROME	0.130542	0.356	0.302	1
g10255.t1|GABR2-MOUSE	-0.0278504	0.006	0.017	1
g26376.t1|CDO1-DANRE	0.0370639	0.048	0.025	1
g9539.t1|RTJK-DROME	0.0890116	0.364	0.306	1
g6693.t1|OXSR1-PIG	0.0450008	0.212	0.163	1
g22179.t1|TM10A-RAT	0.0491623	0.272	0.218	1
g18019.t1|PUR9-HUMAN	0.0572023	0.107	0.072	1
g31925.t1|FAAA-BOVIN	0.0524139	0.145	0.104	1
g27551.t1|GLMU-SYNJA	0.0518468	0.101	0.067	1
g24335.t1|GA2L1-HUMAN	0.0917009	0.169	0.126	1
g5391.t1|CMIP-HUMAN	0.044634	0.061	0.035	1
g15774.t1|P2RX4-RAT	-0.0326968	0.017	0.034	1
g11363.t1|CBS-HUMAN	0.0548955	0.037	0.017	1
g29031.t1|NUD19-XENLA	0.0502845	0.133	0.095	1
g15830.t1|PDIA3-PONAB	-0.0902778	0.72	0.764	1
g29330.t1|SUV92-XENTR	0.0555989	0.098	0.065	1
g17835.t1|CP17A-ICTPU	-0.0172417	0.004	0.014	1
g28062.t1|DOA10-SCHPO	0.115821	0.482	0.43	1
g24823.t1|PLK1-RAT	0.0389329	0.05	0.027	1
g12532.t2|EP15R-HUMAN	0.0500424	0.346	0.289	1
g12747.t1|CAR11-HUMAN	-0.0606405	0.151	0.196	1
g26462.t1|SYNG1-MACFA	0.0148896	0.013	0.002	1
g8990.t1|CERS1-MOUSE	0.141797	0.522	0.488	1
g8971.t1|BMPH-STRPU	-0.0355695	0.262	0.197	1
g1765.t1|CAB39-HUMAN	0.0555796	0.102	0.069	1
g10650.t1|YQK1-SCHPO	-0.0472527	0.084	0.117	1
g24657.t1|ASIC2-HUMAN	0.0682037	0.088	0.058	1
g22539.t1|S61A2-MOUSE	-0.146384	0.683	0.701	1
g31249.t1|NADA-APLKU	0.0124562	0.015	0.003	1
g19754.t1|RPTOR-HUMAN	0.033315	0.025	0.009	1
g27862.t1|NPFF2-RAT	-0.0123636	0.003	0.011	1
g14226.t2|TC3A-CAEEL	-0.0114572	0	0.004	1
g21991.t1|STX8-BOVIN	0.0309933	0.208	0.161	1
g15810.t1|GRM3-MOUSE	0.00633304	0.019	0.005	1
g19252.t1|Y1101-SYNY3	0.0955581	0.36	0.301	1
g18880.t1|RPN1-PONAB	-0.105875	0.402	0.442	1
g21670.t1|ZFAN6-PONAB	0.0603586	0.89	0.88	1
g30446.t1|FBP1-STRPU	-0.0501831	0.109	0.145	1
g18364.t1|MAFK-CHICK	-0.138141	0.203	0.238	1
g30863.t1|CHMP3-XENTR	0.0340542	0.108	0.074	1
g28284.t1|T214B-XENLA	-0.148071	0.429	0.468	1
g25773.t1|ANTA-HYDVU	0.0695772	0.024	0.009	1
g3130.t1|TM9S2-MOUSE	0.030413	0.168	0.126	1
g32877.t1|BMP7-MOUSE	-0.0390146	0.065	0.095	1
g19087.t1|CP4V2-HUMAN	0.0199678	0.14	0.1	1
g29409.t1|HTXA-PSEST	0.0598668	0.06	0.035	1
g856.t1|ENDUB-DANRE	0.0599029	0.506	0.462	1
g27236.t1|TISB-MOUSE	0.0579195	0.408	0.349	1
g10933.t1|ST38L-HUMAN	0.0362681	0.102	0.07	1
g20690.t1|ARRD3-RAT	-0.137998	0.143	0.175	1
g28136.t1|ANLN-HUMAN	0.0114231	0.222	0.272	1
g888.t2|MARH8-MOUSE	0.0255959	0.028	0.012	1
g30372.t1|TTC19-RAT	0.0711748	0.221	0.176	1
g4561.t1|PLRG1-HUMAN	0.051975	0.534	0.474	1
g13223.t1|PRD13-MOUSE	0.00658708	0.019	0.006	1
g28925.t1|DCL1-ARATH	0.0728378	0.098	0.068	1
g16546.t1|CE162-DANRE	0.0323074	0.081	0.053	1
g32577.t1|CA2D1-HUMAN	0.0468528	0.166	0.126	1
g10420.t1|SCRIB-HUMAN	0.03211	0.104	0.073	1
g9835.t1|AZIN2-XENLA	0.148713	0.993	0.988	1
g17500.t1|CECR2-HUMAN	0.0582762	0.263	0.216	1
g23834.t1|SPX3-XENLA	0.0156633	0.01	0.001	1
g22612.t1|AR1-XENLA	0.0383063	0.106	0.074	1
g29382.t1|FIG4-MOUSE	0.0674821	0.14	0.105	1
g32458.t1|KCNH1-RAT	0.0113889	0.01	0.001	1
g3473.t3|SCAM1-RAT	0.0607706	0.137	0.102	1
g13156.t1|DICH-DROME	0.041623	0.043	0.023	1
g23435.t1|S2611-HUMAN	-0.0861996	0.029	0.048	1
g7321.t1|GRM5-HUMAN	0.0126419	0.008	0	1
g14889.t1|TOM40-XENLA	0.0717175	0.515	0.469	1
g28166.t1|PFI-PTIFI	-0.0474908	0.041	0.064	1
g11355.t1|CO4A2-ASCSU	0.262156	0.327	0.298	1
g3417.t1|STRN3-MOUSE	0.0612177	0.389	0.339	1
g3036.t1|VPS28-DROME	0.0739551	0.291	0.246	1
g25565.t1|ODF3A-XENLA	0.0112665	0.013	0.003	1
g13478.t1|MFSD6-MOUSE	0.0138439	0.01	0.001	1
g29749.t1|BOULE-DROME	0.0152688	0.011	0.002	1
g17540.t1|AVR2A-CHICK	0.0267291	0.232	0.187	1
g30036.t1|LTV1-MOUSE	0.0675765	0.691	0.64	1
g11725.t3|TRA2B-RAT	0.0642579	0.486	0.433	1
g13907.t1|HUNK-MOUSE	-0.360143	0.429	0.413	1
g17485.t1|RUVB2-XENLA	-0.102712	0.218	0.26	1
g23912.t1|STRAA-HUMAN	0.0581136	0.109	0.078	1
g26881.t2|RGS12-HUMAN	0.0663465	0.224	0.182	1
g9132.t1|KIF2A-CHICK	0.0595906	0.158	0.121	1
g14904.t1|SYT11-HUMAN	-0.0632717	0.07	0.097	1
g19577.t1|CATZ-RAT	0.173359	0.333	0.3	1
g27329.t1|GLNA-XENLA	-0.522588	0.072	0.094	1
g2010.t1|PKHG5-HUMAN	0.0544533	0.085	0.058	1
g33001.t1|PFKAL-BOVIN	-0.0772594	0.124	0.155	1
g236.t1|LIP1-PSYIM	-0.0647773	0.145	0.182	1
g7872.t1|OIT3-MOUSE	-0.0221337	0.008	0.019	1
g15120.t1|DDAH1-MOUSE	-0.108429	0.175	0.21	1
g15244.t1|RIBC2-HUMAN	-0.00561392	0.119	0.155	1
g32290.t1|TREF1-HUMAN	0.0281105	0.057	0.035	1
g23713.t1|PH4H-RAT	0.0759403	0.135	0.101	1
g14614.t1|API5-MOUSE	0.0249217	0.242	0.197	1
g7516.t1|TAF5L-MOUSE	0.0400794	0.058	0.035	1
g7500.t1|SAP18-DROME	0.0388213	0.174	0.136	1
g1409.t1|TEF-MOUSE	-0.38856	0.346	0.339	1
g4438.t1|DRAM1-XENLA	0.0316123	0.058	0.036	1
g32982.t1|PDIA6-PONAB	-0.12488	0.717	0.736	1
g30467.t1|CCKAR-XENLA	0.0135896	0.017	0.005	1
g33794.t1|MYPH-ECHGR	-0.0555547	0.617	0.673	1
g29257.t1|SGCG-CANLF	0.0624024	0.214	0.173	1
g7008.t1|SOX7-XENLA	0.0241349	0.025	0.011	1
g26083.t1|LOX5-MESAU	-0.00404598	0	0.003	1
g17154.t1|DPP2-RAT	0.163566	0.176	0.145	1
g24406.t1|FGFR1-HUMAN	-0.113701	0.187	0.221	1
g31460.t1|NPHP3-HUMAN	0.0223793	0.027	0.012	1
g22557.t1|ZN235-MOUSE	0.0421316	0.381	0.324	1
g30304.t1|MCPI-MELCP	0.330735	0.421	0.523	1
g15202.t1|AMPE-RAT	0.0744968	0.065	0.043	1
g26621.t1|RS26-ANOGA	-0.0377739	0.963	0.975	1
g17139.t1|NEO1-CHICK	0.0368505	0.13	0.097	1
g23437.t1|YS51-CAEEL	-0.26925	0.702	0.594	1
g10518.t1|DRGX-HUMAN	0.120126	0.066	0.043	1
g25069.t1|FORH-DICDI	0.042693	0.133	0.101	1
g21432.t1|RS24-TAKRU	-0.0842488	0.518	0.545	1
g27801.t1|YL662-MIMIV	-0.018783	0.009	0.019	1
g13406.t1|S39AE-MOUSE	0.0228179	0.123	0.091	1
g3126.t1|ANK3-MOUSE	-0.025501	0.004	0.012	1
g8335.t1|WIPI3-CHICK	0.034462	0.12	0.089	1
g7629.t1|RAB1A-RAT	0.0344682	0.161	0.125	1
g22990.t1|GULP1-DANRE	0.0948492	0.307	0.261	1
g7009.t1|SASH1-MOUSE	0.0410764	0.476	0.422	1
g25353.t1|MYPT1-HUMAN	0.0204072	0.016	0.005	1
g19787.t1|EPT1-HUMAN	0.0139913	0.063	0.041	1
g5969.t1|MTCH2-PONAB	0.0194337	0.152	0.117	1
g16689.t1|GRB10-PIG	0.0568647	0.264	0.22	1
g29412.t1|ECE1-CAVPO	0.107268	0.295	0.259	1
g31026.t1|XBP1-MOUSE	-0.145994	0.482	0.495	1
g28303.t1|CHI2-TOBAC	0.0382051	0.029	0.014	1
g21479.t1|CCH1R-DROME	0.0411562	0.02	0.008	1
g26899.t1|VIP2-XENLA	0.0227198	0.24	0.196	1
g3957.t1|NDL1B-DANRE	-0.121107	0.463	0.49	1
g3127.t1|OCTB1-DROME	0.0130912	0.006	0	1
g16724.t1|OPN3-MOUSE	0.00996431	0.006	0	1
g19768.t2|RASS-DICDI	0.0156583	0.029	0.014	1
g20408.t2|WFKN-DANRE	0.0622678	0.055	0.035	1
g33253.t1|KANK3-MOUSE	0.0755431	0.164	0.132	1
g12396.t1|RS19-BRABE	-0.0458778	0.956	0.966	1
g32157.t1|GREM1-XENLA	-0.222496	0.42	0.433	1
g8918.t1|POPD1-DANRE	0.0110748	0.019	0.008	1
g27009.t1|BROX-DANRE	0.0438738	0.221	0.182	1
g14977.t1|VP33A-RAT	0.0375065	0.159	0.126	1
g22246.t1|IFT52-HUMAN	0.0133343	0.014	0.004	1
g32228.t1|SNX32-HUMAN	0.065447	0.363	0.319	1
g28831.t1|STT3A-BOVIN	-0.154676	0.252	0.276	1
g15293.t1|GDF8-OREMO	-0.0278971	0.014	0.026	1
g12158.t1|DING-BACSU	0.0392103	0.109	0.081	1
g4665.t1|MLP3A-BOVIN	0.0165708	0.02	0.009	1
g26036.t1|T120B-MOUSE	0.0336733	0.197	0.16	1
g1768.t1|NAA50-XENLA	0.0677721	0.536	0.489	1
g33394.t1|MA2C1-MOUSE	0.0572715	0.415	0.372	1
g25158.t1|NPY5R-HUMAN	0.022576	0.009	0.002	1
g7599.t1|IFT57-MOUSE	0.0363675	0.213	0.177	1
g5851.t1|CERS6-MOUSE	-0.0780488	0.159	0.193	1
g22671.t1|TWF1-HUMAN	0.0420736	0.058	0.038	1
g1465.t1|RED1-RAT	0.0264836	0.362	0.313	1
g19288.t1|TUTL-DROME	0.0295062	0.021	0.01	1
g22803.t1|MAK16-BOVIN	-0.061563	0.392	0.43	1
g10123.t1|RETST-DANRE	0.01339	0.015	0.005	1
g32989.t1|PPCE-HUMAN	0.0396011	0.057	0.037	1
g27820.t1|SURF6-DROME	-0.0664407	0.313	0.351	1
g21068.t1|CAH1-MOUSE	0.024433	0.048	0.03	1
g22815.t1|TCB1-CAEBR	0.0620418	0.11	0.085	1
g1877.t1|POXA-DICDI	0.0288779	0.068	0.047	1
g11692.t1|RIPL1-MOUSE	0.0458	0.191	0.158	1
g30158.t1|EGTB-MYCS2	-0.0110842	0.01	0.019	1
g2610.t1|DPO3-OCEIH	0.0513002	0.051	0.034	1
g32991.t1|TX264-HUMAN	0.0138406	0.138	0.108	1
g187.t1|SGF29-HUMAN	-0.0832229	0.156	0.185	1
g29800.t1|GDS1B-XENLA	0.0537099	0.204	0.17	1
g25542.t1|GMFB-PONAB	0.0351974	0.144	0.113	1
g4713.t1|MKL2-HUMAN	-0.0961109	0.23	0.258	1
g17491.t1|DDAC-ENTAG	-0.00742899	0.026	0.041	1
g13190.t1|DCPS-PIG	0.0645795	0.316	0.273	1
g30932.t1|GTPB6-HUMAN	0.0265348	0.088	0.065	1
g7335.t1|CHP1-BOVIN	0.0494036	0.279	0.235	1
g8589.t1|S2536-CHICK	0.0360135	0.082	0.059	1
g26084.t1|PSD10-RAT	-0.0464508	0.019	0.031	1
g1836.t1|SX17A-XENTR	0.0165005	0.018	0.008	1
g9809.t1|ORML2-HUMAN	0.0617328	0.117	0.09	1
g25963.t1|PTPRD-HUMAN	0.0080853	0.162	0.129	1
g29020.t1|RGL1-DANRE	-0.147051	0.276	0.303	1
g13436.t1|DAPLE-XENLA	0.0172768	0.257	0.216	1
g11352.t1|CO4A1-DROME	0.202811	0.401	0.368	1
g19368.t1|DPYD-HUMAN	0.0233434	0.055	0.036	1
g6402.t1|KPB1-RABIT	-0.04666	0.067	0.089	1
g9521.t1|ADAL-DANRE	0.0290724	0.039	0.024	1
g13016.t1|KLH20-CHICK	0.0470046	0.232	0.198	1
g13601.t1|HMCN2-HUMAN	0.00852571	0.093	0.12	1
g16434.t1|PZRN3-HUMAN	0.047866	0.409	0.361	1
g11545.t1|ADM1A-MOUSE	0.0107896	0.014	0.005	1
g16230.t1|NK2R-CAVPO	0.0717009	0.047	0.031	1
g27641.t1|AKTS1-MOUSE	0.0351962	0.103	0.078	1
g21095.t1|JADE3-MOUSE	0.0107515	0.104	0.079	1
g14554.t1|GATL3-PONAB	0.0153289	0.071	0.05	1
g11059.t1|PSD2-HUMAN	0.0217685	0.11	0.084	1
g26959.t1|AT1A-HYDVU	0.00784236	0.007	0.001	1
g14067.t1|TBCD9-MOUSE	0.00792134	0.103	0.077	1
g9287.t1|YUGO-BACSU	0.0067498	0.007	0.001	1
g29375.t1|SAXO1-RAT	0.0363712	0.106	0.081	1
g32707.t1|RTN4-HUMAN	0.0199569	0.082	0.059	1
g21405.t1|SAMH1-HUMAN	0.0243279	0.033	0.019	1
g22541.t1|AVIL-MOUSE	0.25725	0.27	0.25	1
g21675.t1|RB11B-DIPOM	0.0200351	0.159	0.128	1
g22455.t1|AB22G-ARATH	-0.0055259	0.004	0.01	1
g11373.t1|PEX6-DICDI	-0.00490358	0.024	0.012	1
g29944.t1|N2F1B-DANRE	0.0152118	0.017	0.007	1
g4815.t1|OAT-DROME	0.0519259	0.27	0.231	1
g10796.t1|IF4G1-ORYSJ	0.0119628	0.075	0.054	1
g27244.t1|KPC2-APLCA	-0.0432024	0.027	0.041	1
g14672.t1|VPS41-MOUSE	0.0490659	0.08	0.059	1
g30512.t1|RS40-ARATH	0.0274871	0.702	0.669	1
g33212.t1|TSN11-MOUSE	-0.00301343	0.624	0.725	1
g31735.t1|EAA1-AMBTI	-0.0660291	0.032	0.047	1
g21748.t1|FA13A-HUMAN	0.0405209	0.137	0.109	1
g26666.t1|TRXR3-MOUSE	0.0635452	0.434	0.391	1
g28492.t2|KLH20-RAT	0.00979169	0.05	0.033	1
g33566.t1|KPCI-HUMAN	0.00725073	0.024	0.012	1
g22786.t1|SC5A8-HUMAN	-0.0145328	0.017	0.028	1
g31394.t1|ARGI-LITCT	0.218555	0.184	0.225	1
g16033.t1|DIRA-CAEEL	-0.00317884	0	0.002	1
g30660.t2|SNX11-MOUSE	-0.00375159	0	0.002	1
g9950.t1|S2611-MOUSE	-0.00557433	0	0.002	1
g21488.t1|OPN4B-XENLA	-0.00937347	0.001	0.005	1
g17754.t1|S36A1-HUMAN	-0.00219489	0.001	0.005	1
g11169.t1|NHLC2-CHICK	-0.00249236	0.057	0.039	1
g10014.t1|ELL-HUMAN	-0.0797915	0.832	0.833	1
g4434.t1|UBP47-MOUSE	0.0242702	0.086	0.065	1
g29414.t1|AA2AR-HUMAN	0.0397016	0.067	0.048	1
g30639.t1|NAS13-CAEEL	0.0202348	0.318	0.279	1
g10106.t1|CSMD1-HUMAN	-0.00772204	0.258	0.217	1
g2463.t1|DNAJ-LEGPN	0.00561393	0.004	0	1
g2041.t1|GPR18-AMPAM	0.00520706	0.004	0	1
g22189.t1|DCOR-MUSPA	0.00400312	0.004	0	1
g14107.t1|RIMK-SERP5	0.0609118	0.283	0.246	1
g7398.t1|PAPSS-URECA	0.106353	0.531	0.504	1
g5312.t1|GO45-HUMAN	0.0366514	0.104	0.081	1
g32849.t1|MK01-BOVIN	0.0365261	0.213	0.18	1
g12368.t1|KCNA2-HUMAN	0.016379	0.02	0.01	1
g13980.t1|COMA-CONMA	-0.00638116	0.005	0.012	1
g16331.t2|TOP2B-HUMAN	-0.0101286	0.008	0.015	1
g32399.t1|CNFNA-XENLA	-0.0082741	0.013	0.023	1
g14839.t1|MFD6B-DANRE	0.0143991	0.006	0.001	1
g30419.t1|KIF3A-HUMAN	0.0151734	0.006	0.001	1
g562.t1|KCNA1-HUMAN	-0.00552771	0.001	0.004	1
g29180.t1|HOBOT-DROME	-0.00394048	0.001	0.004	1
g29474.t1|RHCG-XENTR	0.0202449	0.023	0.012	1
g15515.t1|S35F6-PONAB	0.0102973	0.077	0.057	1
g25247.t1|CAH6-BOVIN	0.00794724	0.009	0.003	1
g28594.t1|ROBO3-MOUSE	0.190272	0.285	0.262	1
g17574.t1|CAC1A-APIME	0.0159943	0.011	0.004	1
g4672.t1|EGGS-SCHMA	0.00225581	0.013	0.005	1
g11005.t1|S18B1-HUMAN	-0.025243	0.011	0.019	1
g25905.t1|FBN3-HUMAN	0.0637545	0.039	0.026	1
g3974.t1|GNPTG-MOUSE	0.0390482	0.091	0.069	1
g13309.t1|SYIC-HUMAN	-0.0561068	0.095	0.116	1
g22270.t1|ACINU-MOUSE	-0.117527	0.261	0.283	1
g12137.t1|ITPK1-CHICK	0.0454309	0.445	0.401	1
g19680.t1|OVCA2-DANRE	-0.00398952	0.072	0.052	1
g33493.t2|FOXO-DROAN	-0.00843737	0.001	0.004	1
g5289.t1|HYOU1-DANRE	-0.127368	0.446	0.466	1
g8486.t1|PSD11-RAT	0.0668233	0.368	0.337	1
g27925.t3|TORSO-BOMMO	0.0375759	0.047	0.032	1
g1266.t1|AOSL-PLEHO	-0.0162236	0.003	0.008	1
g17459.t2|CE104-HUMAN	0.0357365	0.301	0.26	1
g16072.t1|P5CR1-BOVIN	0.0381595	0.048	0.033	1
g20553.t1|LCE-ORYLA	0.00962633	0.019	0.01	1
g2195.t1|ARL1-RAT	0.0261892	0.427	0.381	1
g18226.t1|KBL-HUMAN	0.00346647	0.346	0.306	1
g19075.t1|TOB1-HUMAN	-0.0341879	0.033	0.047	1
g33380.t1|IF43A-SALSA	0.0126529	0.046	0.031	1
g7128.t1|VIAAT-XENLA	0.00618336	0.004	0	1
g31982.t1|BAG6A-XENLA	0.0458115	0.205	0.174	1
g4803.t1|BRA-PATPE	0.0213554	0.014	0.006	1
g29264.t1|DOCK1-HUMAN	0.0338156	0.083	0.064	1
g528.t1|WDR33-MOUSE	0.0135899	0.137	0.112	1
g9209.t1|DNLI3-HUMAN	0.0203869	0.019	0.01	1
g17783.t1|KFA-MOUSE	0.0608806	0.065	0.049	1
g31717.t3|ATTY-MOUSE	0.0323579	0.025	0.014	1
g4486.t1|DGLA-MOUSE	0.0623031	0.071	0.054	1
g17364.t1|FBXW7-DROME	0.0394702	0.123	0.1	1
g22276.t1|MCM4B-XENLA	-0.0265588	0.022	0.033	1
g7382.t1|SAM9L-MOUSE	0.0111062	0.027	0.016	1
g30894.t1|FGFR-HYDVU	-0.0448195	0.03	0.043	1
g26375.t1|CDO1-DANRE	0.0148594	0.175	0.145	1
g17949.t1|NPHP3-HUMAN	0.00664838	0.009	0.003	1
g8604.t1|WDR74-BOVIN	-0.0630223	0.179	0.205	1
g1475.t1|ZIFL1-ARATH	0.00384098	0.005	0.001	1
g11761.t1|CASP8-RAT	0.0287992	0.05	0.035	1
g20052.t1|ATD3B-XENLA	-0.0728162	0.272	0.302	1
g8475.t1|DDX42-CHICK	0.0232691	0.497	0.448	1
g20374.t1|DCAF7-MOUSE	0.00878383	0.125	0.101	1
g1705.t1|ANR44-HUMAN	-0.0332566	0.138	0.164	1
g30864.t1|P5CS-PONAB	-0.0121268	0.02	0.031	1
g3347.t1|MED13-DROME	0.0143728	0.017	0.009	1
g10338.t1|SVEP1-MOUSE	-0.0122748	0.003	0.007	1
g28310.t1|ETV1-MOUSE	-0.00533638	0.004	0.01	1
g21409.t1|GNAS-ANOGA	-0.0632393	0.359	0.381	1
g5548.t1|ACE-RAT	0.0879954	0.111	0.092	1
g3801.t2|RFX6-DANRE	0.00569571	0.003	0	1
g26755.t1|TCB1-CAEBR	0.0040758	0.003	0	1
g308.t1|GRM8-HUMAN	0.00347743	0.003	0	1
g5003.t2|GAPR1-MOUSE	0.00839238	0.016	0.008	1
g12998.t1|GDAP2-NEMVE	0.0355966	0.067	0.05	1
g26547.t1|STN1-AILME	0.0195374	0.015	0.007	1
g20580.t1|APLP-LOCMI	0.149818	0.282	0.261	1
g19618.t1|CLH1-RAT	0.0419344	0.223	0.191	1
g13729.t1|ACADV-RAT	0.0105539	0.019	0.011	1
g27535.t1|PSA3-HUMAN	0.0238392	0.302	0.269	1
g4572.t1|CLIC1-HUMAN	0.072953	0.68	0.639	1
g7997.t1|HNMT-TETNG	-0.0650307	0.24	0.267	1
g17270.t1|PA2-APIME	0.0109511	0.005	0.001	1
g22916.t1|GDF6A-DANRE	0.00432908	0.017	0.009	1
g9691.t1|ATG13-DROME	0.0404671	0.127	0.105	1
g19257.t1|DZIP1-DANRE	-0.000720291	0.028	0.04	1
g18772.t1|TM151-CAEBR	0.0084237	0.013	0.006	1
g22235.t1|PLRG1-BOVIN	0.0129733	0.14	0.116	1
g18711.t1|CPEB4-MOUSE	0.00830439	0.045	0.032	1
g10391.t1|NICA-MOUSE	0.0115196	0.053	0.038	1
g20534.t1|PFD4-HUMAN	0.0642385	0.316	0.283	1
g268.t1|IYD1-PONAB	-0.0338853	0.137	0.163	1
g27545.t1|TATD1-BOVIN	0.0437498	0.238	0.208	1
g25647.t2|TLE4-MOUSE	-0.0962388	0.347	0.362	1
g28849.t1|TBA1D-BOVIN	0.0364073	0.67	0.659	1
g12685.t2|MFS12-MOUSE	0.0107674	0.012	0.005	1
g31047.t1|UVR8-ARATH	-0.000465485	0.037	0.025	1
g32759.t1|NPHP3-MOUSE	-0.0194417	0.038	0.051	1
g8636.t1|ATIF1-PONAB	0.0483142	0.712	0.682	1
g7936.t1|ADA1A-ORYLA	-0.00709122	0.075	0.094	1
g29442.t1|AGGF1-MOUSE	0.0173855	0.185	0.159	1
g25248.t1|CAH2-TRIHK	0.00858321	0.003	0	1
g13689.t1|BOLL-HUMAN	0.0054403	0.003	0	1
g1250.t1|MLP-ACRMI	0.00301048	0.003	0	1
g14239.t2|DUS9-HUMAN	-0.0031358	0.001	0.004	1
g23939.t1|PPSB-BACSU	-0.018242	0.048	0.063	1
g30790.t1|KMT5A-MOUSE	0.0077633	0.008	0.003	1
g18492.t1|ANKS3-HUMAN	-0.0900432	0.139	0.157	1
g19029.t1|RL7A-TAKRU	-0.0715258	0.516	0.528	1
g20339.t1|NR1BA-DANRE	0.0270155	0.018	0.01	1
g28482.t1|KDM4A-MOUSE	0.00847661	0.031	0.02	1
g1354.t1|CNKR2-HUMAN	0.0170582	0.062	0.047	1
g22633.t1|IVD-CAEEL	0.0165393	0.021	0.012	1
g1089.t1|SYCP3-MESAU	0.00260597	0.024	0.014	1
g23578.t1|PHRF1-MOUSE	0.00031245	0.005	0.001	1
g15882.t1|UN13B-MOUSE	-0.0944429	0.18	0.198	1
g3731.t1|TULP3-HUMAN	0.0433936	0.304	0.271	1
g21277.t1|FOLR3-HUMAN	-0.0339342	0.113	0.135	1
g11058.t1|C9MT-KOMPG	-0.110819	0.309	0.323	1
g23419.t1|KANL2-PONAB	0.0262064	0.138	0.116	1
g22569.t1|NAPEP-BOVIN	-0.0175959	0.145	0.169	1
g23580.t1|TBCE-MOUSE	0.00980116	0.104	0.084	1
g1874.t1|BCAR1-HUMAN	-0.0800478	0.454	0.463	1
g16557.t1|VAB15-CAEEL	-0.0122276	0.005	0.011	1
g9169.t1|CAH2-TRIHK	0.0178317	0.031	0.02	1
g15826.t1|MK06-HUMAN	-0.131345	0.323	0.341	1
g25729.t1|TTC31-HUMAN	0.0314987	0.545	0.499	1
g21597.t1|PIMT-DANRE	-0.0460804	0.109	0.127	1
g19927.t1|APOA4-HUMAN	0.0114392	0.008	0.003	1
g25906.t1|PDE8B-HUMAN	-0.0583542	0.122	0.141	1
g20766.t1|GAPR1-HUMAN	0.010646	0.013	0.006	1
g21014.t1|KI21A-HUMAN	0.0126883	0.356	0.32	1
g6648.t1|B3GN4-HUMAN	0.00673248	0.003	0	1
g9617.t1|RTBS-DROME	0.00460488	0.003	0	1
g9734.t2|UBA6-HUMAN	0.00398578	0.003	0	1
g31248.t1|NADA-APLKU	0.00353251	0.003	0	1
g19320.t1|NPY4R-MOUSE	0.00201192	0.003	0	1
g21056.t1|PDIA4-BOVIN	-0.0672397	0.125	0.143	1
g10853.t1|RNC-MOUSE	0.0243161	0.123	0.102	1
g17940.t1|MYPH-ECHGR	-0.214709	0.433	0.421	1
g31739.t1|SDCG3-BOVIN	0.00902227	0.027	0.018	1
g20913.t1|DEN2C-HUMAN	0.00872015	0.028	0.019	1
g17639.t1|CLPT1-HUMAN	-4.56347e-05	0.289	0.258	1
g25385.t1|PLLP-MOUSE	0.0344396	0.097	0.118	1
g13544.t2|SDCB1-HUMAN	0.0262116	0.624	0.585	1
g29153.t1|SLD5-MOUSE	0.0191942	0.179	0.156	1
g11470.t1|ZSC31-HUMAN	0.10354	0.138	0.121	1
g6022.t1|SINL2-ARATH	0.00328372	0.015	0.008	1
g24350.t1|DRG1-XENLA	-0.00519636	0.451	0.413	1
g12039.t2|TRI67-HUMAN	0.00594897	0.024	0.015	1
g32332.t1|LOL2B-DANRE	-0.00439037	0.033	0.044	1
g22613.t1|TM136-BOVIN	0.0225195	0.013	0.007	1
g29864.t2|BRE1-DROME	-0.00122136	0.318	0.286	1
g28042.t1|ARHB-XENLA	0.159439	0.189	0.173	1
g23544.t2|KDM2A-XENTR	-0.00734563	0.005	0.01	1
g27611.t1|ZSCA2-MOUSE	0.0142717	0.125	0.105	1
g10738.t1|SAHHB-XENLA	0.0397652	0.485	0.448	1
g16704.t1|IDH3A-DROME	0.0215906	0.128	0.109	1
g25762.t1|A4-CAEEL	0.0816882	0.883	0.885	1
g11528.t1|CO1A2-RAT	0.357302	0.404	0.376	1
g17742.t1|NCAN-PANTR	0.00457625	0.002	0	1
g22631.t1|DD3-DICDI	0.00483642	0.128	0.109	1
g33094.t1|BRE-BRAFL	0.00832465	0.026	0.017	1
g16024.t1|ZMYM1-HUMAN	-0.0109637	0.006	0.011	1
g14494.t3|KSR2-HUMAN	0.0577726	0.112	0.096	1
g31028.t2|ZMIZ2-MOUSE	-0.0516019	0.33	0.351	1
g26833.t1|SLIT-DROME	0.112176	0.594	0.623	1
g3108.t1|CCD39-XENTR	-0.0059862	0.007	0.012	1
g28610.t1|OPN3-HUMAN	-0.000454612	0	0.001	1
g15962.t1|CHIC2-HUMAN	0.00882217	0.145	0.123	1
g12125.t1|CALM-HALOK	-0.00350775	0.001	0.003	1
g25238.t1|MAEL-XENTR	0.0460433	0.277	0.249	1
g4045.t1|FAZ1-TRYB9	-0.0892795	0.375	0.385	1
g14109.t1|COEA1-MOUSE	0.0542043	0.04	0.029	1
g5789.t1|HACD3-DANRE	0.00609454	0.067	0.053	1
g5167.t1|CEP41-CHICK	0.0297226	0.104	0.087	1
g1743.t1|LAMA4-HUMAN	0.100279	0.137	0.122	1
g3249.t1|TEAD1-MOUSE	-0.03613	0.003	0.007	1
g5732.t1|PYR1-HUMAN	0.0126935	0.096	0.08	1
g947.t2|FGF12-RAT	-0.00665305	0.003	0.007	1
g20345.t1|SYK-MOUSE	0.0419949	0.375	0.348	1
g26363.t1|KPTN-HUMAN	0.00612921	0.013	0.007	1
g19746.t1|AL3A1-MOUSE	-0.0121327	0.243	0.213	1
g6109.t1|ENTP7-MOUSE	-0.0269507	0.014	0.021	1
g32440.t1|PRS6B-MACFA	-0.00645911	0.386	0.347	1
g23256.t1|MFSD8-MOUSE	0.00666928	0.045	0.034	1
g19446.t1|DNJC7-MOUSE	0.0175823	0.4	0.368	1
g3220.t1|COMA-CONMA	0.034699	0.028	0.019	1
g5150.t1|AKP13-HUMAN	0.0492259	0.096	0.081	1
g10301.t1|MA2B1-CAVPO	-0.0807629	0.242	0.26	1
g31893.t1|NSUN2-XENTR	-0.0261672	0.105	0.121	1
g17730.t1|TM86A-HUMAN	-0.0362964	0.065	0.078	1
g5099.t1|CHADL-MOUSE	-0.0260682	0.011	0.017	1
g227.t1|KCNC1-MOUSE	0.00349264	0.002	0	1
g1473.t1|GDF8-TAUDE	-0.000438292	0.005	0.009	1
g2978.t1|NAS15-CAEEL	0.0424049	0.034	0.025	1
g28970.t1|TECR-ARATH	0.0230829	0.023	0.015	1
g31057.t1|RPA2-RAT	0.00249933	0.013	0.007	1
g10457.t1|S17AB-XENLA	0.00653305	0.004	0.001	1
g33763.t2|KIN17-MOUSE	-0.00173717	0	0.002	1
g30862.t1|GRK5-BOVIN	0.0380778	0.418	0.387	1
g27330.t1|GLNA-PANAR	-0.0609851	0.082	0.066	1
g10852.t1|RNC-HUMAN	0.0226497	0.047	0.036	1
g24118.t1|IF5A-SPOFR	-0.0268396	0.937	0.935	1
g21684.t1|PAIP1-MOUSE	0.0206476	0.088	0.074	1
g7634.t1|PKHM3-XENLA	0.00552367	0.024	0.016	1
g8497.t1|CO1A2-LITCT	0.190944	0.468	0.424	1
g22113.t1|M3K3-HUMAN	0.0146502	0.085	0.07	1
g23607.t1|SERB-MOUSE	0.0333518	0.08	0.066	1
g14792.t1|GPHR-SALSA	0.00735242	0.075	0.061	1
g20062.t1|CAH6-MOUSE	0.00687551	0.009	0.004	1
g12992.t1|CHSTB-RAT	-0.00224238	0.011	0.006	1
g10307.t1|MANA3-ARATH	0.0267352	0.028	0.02	1
g8377.t1|BUB3-MOUSE	-0.0152934	0.091	0.075	1
g27080.t1|S35F1-MOUSE	-0.103695	0.081	0.093	1
g32363.t1|TCPR2-HUMAN	-0.024742	0.207	0.181	1
g4633.t1|WDR26-DANRE	0.0106631	0.049	0.038	1
g25264.t1|ADAM8-HUMAN	-0.00686087	0.003	0.006	1
g4288.t1|AKTIP-NEMVE	0.019285	0.113	0.097	1
g13519.t1|RNOY-CRAGI	0.0506413	0.09	0.077	1
g23901.t1|LAC2-BOTFU	0.191666	0.361	0.352	1
g15732.t1|BETS-RHIML	0.0130782	0.013	0.008	1
g15506.t1|MTF2-PONAB	0.00924777	0.013	0.008	1
g10166.t1|COA-ACRMI	0.113112	0.285	0.316	1
g29960.t1|DGKD-HUMAN	0.00770377	0.032	0.024	1
g31864.t1|T150A-RAT	-0.00124205	0.001	0.004	1
g15023.t1|HIP1R-HUMAN	-0.00240176	0.117	0.1	1
g1922.t1|MACO1-DANRE	-0.0210866	0.223	0.199	1
g30300.t1|MCPI-MELCP	-0.000721066	0.179	0.198	1
g32271.t1|KCNH6-RAT	-0.0267681	0.008	0.012	1
g699.t1|A16L1-MOUSE	0.0104751	0.003	0.001	1
g31698.t1|TM175-MOUSE	0.00352617	0.002	0	1
g15389.t1|CALM5-ARATH	0.00307863	0.002	0	1
g29101.t1|FUT8-PIG	0.00292179	0.002	0	1
g14703.t1|GFI1B-MOUSE	0.0026649	0.002	0	1
g6172.t2|CH037-DANRE	0.00236451	0.002	0	1
g11929.t3|FPPS-BOVIN	0.0023187	0.002	0	1
g11611.t3|AGRG6-DANRE	0.00543813	0.006	0.003	1
g16907.t1|MLRP2-ACRMI	-0.00774447	0.039	0.049	1
g28376.t1|CATIP-DANRE	-0.0482417	0.109	0.121	1
g4473.t1|OTOF-RAT	-0.0069588	0.009	0.013	1
g7515.t1|CY250-MOUSE	0.00545505	0.009	0.004	1
g19766.t1|ALKB5-MOUSE	-0.0774502	0.265	0.28	1
g29449.t1|MP20-DROME	0.0449669	0.472	0.419	1
g29219.t1|TCB1-CAEBR	0.00522343	0.009	0.004	1
g15863.t1|OPN3-MOUSE	-0.00975748	0.006	0.01	1
g10588.t1|3BP5H-DROME	-0.0186886	0.069	0.057	1
g29167.t1|NFXL1-XENLA	0.0338683	0.084	0.071	1
g21006.t1|ASPG-DIRIM	-0.0515483	0.109	0.091	1
g21926.t1|CS012-XENTR	0.0341294	0.054	0.043	1
g14025.t1|NPL4-MOUSE	-0.0137923	0.162	0.143	1
g32310.t1|SGPP2-MOUSE	-0.00371706	0.147	0.128	1
g33765.t1|GRM3-MOUSE	0.00899114	0.01	0.005	1
g28490.t1|WDR12-SALSA	-0.0309201	0.219	0.24	1
g944.t1|ZFY26-BOVIN	0.0160511	0.036	0.027	1
g24378.t1|GRM8-HUMAN	0.00301762	0.007	0.004	1
g15226.t1|ARX-RAT	0.0013844	0.007	0.004	1
g31098.t1|S35B1-MOUSE	-0.0614243	0.15	0.163	1
g6839.t1|HSP70-HYDVU	0.00976328	0.518	0.483	1
g30242.t1|MAOX-RAT	-0.00127393	0.146	0.129	1
g5225.t1|ADRB2-TSCTR	0.0117927	0.026	0.019	1
g8917.t1|FGF2-CHICK	-0.0025883	0.12	0.105	1
g2768.t1|PAG15-HUMAN	0.019771	0.019	0.013	1
g26583.t2|TENS1-HUMAN	0.0132036	0.008	0.004	1
g26815.t1|SIX6-HUMAN	0.035667	0.15	0.134	1
g19737.t1|MFNA-METPE	0.00156487	0.008	0.004	1
g12785.t1|NAT-MYCTU	0.0145089	0.022	0.016	1
g2009.t1|KGUA-YEAST	0.00384294	0.008	0.004	1
g387.t1|GTDC1-DROME	-0.0270214	0.02	0.027	1
g7529.t1|DHX34-MOUSE	-0.00541483	0.026	0.033	1
g26924.t1|FAT4-MOUSE	-0.0109344	0.082	0.095	1
g26856.t1|RRP12-HUMAN	-0.0184788	0.036	0.044	1
g15881.t1|N2F1A-DANRE	0.00442805	0.003	0.001	1
g28061.t1|CTR1-RAT	0.0152534	0.004	0.002	1
g14575.t1|FAN-HUMAN	-0.000916429	0.021	0.027	1
g4766.t1|LRC23-MOUSE	-0.0119396	0.019	0.026	1
g21238.t1|C2D2A-HUMAN	-0.00895814	0.036	0.028	1
g5131.t1|G3ST1-MOUSE	-0.00541275	0.026	0.033	1
g33112.t1|SNX9-MOUSE	0.00583627	0.001	0	1
g19107.t2|FHL3-HUMAN	0.0049078	0.001	0	1
g3579.t1|NU4M-METSE	0.00443526	0.001	0	1
g1956.t1|CATL-DROME	0.00241246	0.001	0	1
g13528.t1|HM10-CAEEL	0.00233164	0.001	0	1
g18272.t3|TC1A-CAEEL	0.00160381	0.001	0	1
g31738.t1|RBM41-DANRE	0.00476857	0.014	0.009	1
g5395.t1|MAX-RAT	-0.00696565	0.007	0.011	1
g27576.t1|HLYS-HYDVU	-0.00745528	0.077	0.066	1
g24355.t1|EST1A-HUMAN	-0.00135111	0.007	0.011	1
g26572.t1|LAC24-ORYSJ	-0.0139923	0.004	0.007	1
g12458.t1|PLPL2-RAT	0.0019203	0.036	0.028	1
g10987.t1|RET-MOUSE	0.00821675	0.015	0.01	1
g24804.t1|HYI-DANRE	0.123786	0.268	0.252	1
g1928.t1|PTN13-MOUSE	-0.00184651	0.001	0.003	1
g15735.t1|MYC-HUMAN	-0.00238785	0.001	0.003	1
g31254.t1|CD38-MACFA	0.00914742	0.01	0.006	1
g31399.t1|PAX6-DANRE	-0.000370703	0.001	0.003	1
g8059.t1|TMCC3-HUMAN	0.00127224	0.046	0.037	1
g21563.t1|ACSL4-MOUSE	0.010174	0.389	0.356	1
g7825.t1|ELP5-DANRE	-0.0171116	0.041	0.033	1
g17465.t1|GORS2-HUMAN	-0.101327	0.192	0.202	1
g18244.t1|TIM-RAT	-0.00271749	0.016	0.011	1
g30700.t1|DUS16-HUMAN	-0.0692351	0.611	0.629	1
g15913.t1|KCNK9-XENLA	-0.0257083	0.014	0.019	1
g28960.t1|NRF6-CAEEL	-0.00683319	0.06	0.07	1
g13667.t1|TDR12-HUMAN	-0.0301842	0.167	0.18	1
g1967.t2|CCD65-BOVIN	0.0102273	0.008	0.004	1
g2718.t1|PPM1D-MOUSE	0.0273427	0.084	0.073	1
g16408.t1|LTBP1-HUMAN	0.00581287	0.005	0.003	1
g2480.t1|MAP11-DANRE	-0.011021	0.176	0.158	1
g2291.t1|NALD2-MOUSE	-0.0177958	0.136	0.152	1
g24277.t1|ASTA-ASTAS	-0.00218267	0.02	0.027	1
g12434.t1|ELK1-RAT	0.00326688	0.005	0.003	1
g18430.t1|LRRK2-HUMAN	-0.0120704	0.028	0.035	1
g25416.t1|PLOD1-CHICK	0.0189465	0.232	0.255	1
g4084.t1|PKHB2-MOUSE	-0.0288542	0.031	0.038	1
g23119.t1|LYAG-RAT	-0.00502609	0.005	0.003	1
g14375.t1|RTJK-DROME	-0.00770145	0.017	0.022	1
g3833.t1|TI17A-HUMAN	0.00870839	0.013	0.009	1
g2661.t1|CO5A1-CRILO	-0.0447823	0.092	0.103	1
g4419.t1|SL9A8-CHICK	0.00478862	0.037	0.029	1
g1431.t1|PAXI-MOUSE	-0.00351624	0.314	0.288	1
g33141.t1|OCT4-ARATH	0.00896972	0.004	0.002	1
g24482.t1|PCYOX-MACFA	-0.017775	0.24	0.216	1
g16851.t1|EXOC8-XENLA	0.00337114	0.506	0.481	1
g11022.t1|ALG9-HUMAN	0.00421876	0.018	0.013	1
g33079.t1|ACT-CYAM1	-0.0296986	0.04	0.047	1
g12085.t1|BRE4-CAEBR	0.00700143	0.003	0.001	1
g25843.t1|PRDM7-HUMAN	0.00463366	0.003	0.001	1
g29493.t1|THAP1-SALSA	0.00172763	0.003	0.001	1
g16394.t1|ARI3A-MOUSE	-0.014725	0.043	0.05	1
g14965.t1|MUL1-XENLA	0.00500205	0.063	0.054	1
g14732.t1|AMZ2-RAT	0.0100695	0.15	0.133	1
g7893.t1|DAB-DROME	-0.00760456	0.189	0.205	1
g26394.t1|K319L-PONAB	-0.0666278	0.186	0.197	1
g6825.t1|QRIC2-HUMAN	0.00299544	0.001	0	1
g27814.t1|NPHP3-XENLA	0.00270241	0.001	0	1
g4192.t1|KT5AA-XENLA	0.00262754	0.001	0	1
g11764.t1|FOXI1-XENTR	0.00232975	0.001	0	1
g22656.t1|Y2336-CANAL	0.00195833	0.001	0	1
g20826.t1|C163A-CANLF	0.00186279	0.001	0	1
g24306.t1|GRM4-MOUSE	0.00158671	0.001	0	1
g19635.t1|Y1199-DICDI	0.00102605	0.001	0	1
g17984.t1|CRYAB-BOVIN	0.000819339	0.001	0	1
g14212.t1|T150A-RAT	0.00204034	0.002	0.004	1
g20600.t2|GRM1B-MOUSE	-0.00319841	0.005	0.008	1
g18574.t1|HYD-DROME	0.00611093	0.017	0.012	1
g20467.t1|GSTA-PLEPL	0.0158707	0.108	0.096	1
g3534.t1|HPDL-RAT	0.00718438	0.06	0.051	1
g20341.t1|WWOX-MOUSE	-0.0210339	0.084	0.093	1
g18812.t1|MKNK1-XENTR	0.0122704	0.195	0.178	1
g6382.t1|NAS14-CAEEL	0.037914	0.02	0.015	1
g16817.t2|GALT2-DROME	-0.00764597	0.442	0.411	1
g16772.t1|KRH1-DROME	-0.00597256	0.024	0.019	1
g11787.t1|F207A-HUMAN	-0.0281901	0.365	0.342	1
g29132.t1|SESN1-HUMAN	-0.00200209	0.102	0.091	1
g22570.t2|NAPEP-HUMAN	0.00438849	0.329	0.306	1
g20042.t1|I2BLA-XENLA	0.00945227	0.183	0.168	1
g6704.t1|OXA1L-MOUSE	0.0311577	0.129	0.117	1
g22127.t1|DCTN5-MOUSE	-0.00747628	0.171	0.156	1
g21527.t1|EPB1B-XENLA	0.0054107	0.006	0.004	1
g22924.t1|OTOF-HUMAN	0.00443678	0.006	0.004	1
g30982.t1|CNOT1-XENTR	-0.00605623	0.032	0.038	1
g12412.t2|XPP3-MOUSE	-0.0100369	0.096	0.085	1
g5122.t1|R213A-DANRE	-0.00234566	0.006	0.004	1
g24856.t1|XPOT-HUMAN	0.000229344	0.025	0.019	1
g16538.t1|RNH2B-XENTR	0.0154644	0.073	0.064	1
g15160.t1|PGBD2-HUMAN	0.0017709	0.004	0.002	1
g7832.t1|GRP1-HUMAN	0.00948987	0.017	0.012	1
g14323.t1|PKDRE-MOUSE	0.000589971	0.013	0.009	1
g863.t1|LBP-MOUSE	-0.00344932	0.001	0.002	1
g3739.t4|DYST-MOUSE	-0.00550283	0.001	0.002	1
g14891.t1|CNR1A-TAKRU	0.00108029	0.02	0.025	1
g5911.t1|WEE1-MOUSE	-0.00536895	0.021	0.016	1
g33668.t1|RERE-HUMAN	0.0082617	0.163	0.149	1
g30081.t1|F214A-HUMAN	0.00507125	0.097	0.086	1
g7040.t1|CKS1-DROME	-0.00409969	0.096	0.085	1
g31543.t1|OXDD-PIG	-0.010285	0.044	0.037	1
g17052.t1|Y689-RICPR	-0.00718245	0.008	0.011	1
g27404.t1|SMBT1-HUMAN	-0.00760347	0.09	0.079	1
g22147.t1|SNG2-MOUSE	-0.0129055	0.098	0.087	1
g4835.t1|BPL1-HUMAN	0.00399234	0.025	0.019	1
g1442.t1|OAS1-PIG	0.00197501	0.002	0.001	1
g7961.t1|KCNC1-MOUSE	9.37382e-05	0.019	0.024	1
g25132.t1|DYHC1-MOUSE	0.0218927	0.415	0.392	1
g5130.t1|PUM2-HUMAN	0.0192551	0.144	0.13	1
g870.t1|F92A1-BOVIN	0.00472235	0.068	0.059	1
g10336.t1|WDR55-DANRE	0.00524694	0.198	0.182	1
g27327.t1|KMCP1-MOUSE	0.0132326	0.043	0.036	1
g31010.t1|YJCS-ECOLI	-0.0050856	0.149	0.162	1
g19881.t3|SYTL4-HUMAN	0.0123205	0.009	0.006	1
g4782.t1|KAT3-DANRE	0.0134535	0.009	0.006	1
g10148.t1|TBD2A-HUMAN	0.00913922	0.021	0.017	1
g6414.t1|SMHD1-HUMAN	0.0104121	0.107	0.096	1
g20391.t2|SF3A2-RAT	-0.0637268	0.421	0.43	1
g15984.t1|ELOC-RAT	-0.0229168	0.408	0.411	1
g28796.t1|PGAP1-MOUSE	-0.0548785	0.066	0.073	1
g9871.t1|P4R3A-MOUSE	-0.0593015	0.162	0.173	1
g12734.t1|IFT56-HUMAN	0.0019644	0.063	0.055	1
g32789.t1|FAT4-MOUSE	0.00882861	0.013	0.01	1
g9170.t1|S29A1-HUMAN	-0.00688376	0.011	0.008	1
g4593.t1|ASB10-HUMAN	0.00715377	0.047	0.041	1
g28084.t1|MCTP2-HUMAN	-0.00547407	0.017	0.013	1
g12839.t1|RHCG-PIG	0.0011308	0.014	0.011	1
g26961.t1|IBPC-BOVIN	0.103504	0.109	0.103	1
g14019.t1|WDR90-XENTR	-0.00392672	0.001	0.003	1
g33631.t1|DKK3-CHICK	-0.000653857	0.001	0.003	1
g2717.t1|BMR1B-CHICK	-0.00345365	0.004	0.006	1
g24220.t1|HMCN1-HUMAN	0.00155143	0.001	0	1
g4685.t1|AGRL2-HUMAN	0.00102641	0.001	0	1
g9298.t1|BAX-HUMAN	0.000977688	0.001	0	1
g30359.t1|RBMS1-HUMAN	0.000919783	0.001	0	1
g25854.t1|OPN3-HUMAN	0.000840451	0.001	0	1
g19043.t1|G3ST3-MOUSE	0.000801576	0.001	0	1
g6168.t1|PXN1-XENLA	0.000771087	0.001	0	1
g22986.t1|CC14A-HUMAN	0.000729682	0.001	0	1
g32234.t2|CSTR1-ORYSJ	0.000639389	0.001	0	1
g7459.t1|ADAM8-HUMAN	0.000557925	0.001	0	1
g29317.t1|PCFT-XENLA	0.000534771	0.001	0	1
g14838.t1|MFSD6-MOUSE	0.00049543	0.001	0	1
g25947.t3|RRAGC-MOUSE	0.000445238	0.001	0	1
g32551.t1|SPD2A-HUMAN	0.000370055	0.001	0	1
g26208.t1|GIN1-MACFA	0.000322815	0.001	0	1
g1858.t1|SOX1B-DANRE	0.000306417	0.001	0	1
g3315.t1|NEP1-MOUSE	-0.0215263	0.079	0.087	1
g29176.t1|NSMA-DROME	0.0226206	0.057	0.05	1
g7084.t1|ELEL-ECHLU	0.00532237	0.007	0.004	1
g31695.t1|K0513-MOUSE	-0.00279464	0.003	0.005	1
g24626.t1|TRY3-SALSA	-0.00457784	0.003	0.005	1
g4436.t1|FRYL-HUMAN	-0.0128453	0.058	0.05	1
g26124.t1|BZW2-CHICK	-0.0137117	0.697	0.671	1
g23271.t1|TM87A-XENTR	-0.0232078	0.078	0.069	1
g11361.t1|NPHP3-MOUSE	-0.00525356	0.002	0.004	1
g3015.t1|FAK1-CHICK	-0.00195805	0.002	0.004	1
g3414.t2|SCN8A-HUMAN	0.00260024	0.055	0.048	1
g24699.t1|UTP15-BOVIN	-0.0660147	0.292	0.297	1
g22584.t1|AATF-CHICK	0.0106602	0.304	0.285	1
g16288.t1|DAND5-XENTR	0.0318547	0.057	0.065	1
g29980.t1|TRIPC-MOUSE	-0.0488128	0.218	0.225	1
g18743.t1|FREM2-HUMAN	-0.0123812	0.031	0.036	1
g30647.t1|NAS15-CAEEL	-0.000740131	0.008	0.005	1
g29298.t1|FMAR-DROME	0.0458749	0.19	0.206	1
g31978.t1|HIP14-DROME	0.0110847	0.012	0.009	1
g12000.t1|TM175-MOUSE	-0.00859193	0.01	0.013	1
g18581.t1|NLRC3-MOUSE	0.0228015	0.027	0.022	1
g32303.t1|NS1BP-MOUSE	-0.00582006	0.014	0.011	1
g31634.t1|DPO5-SCHPO	0.00186638	0.124	0.135	1
g17240.t1|CAC1I-HUMAN	0.00705942	0.135	0.145	1
g25718.t1|DUS11-HUMAN	-0.0396926	0.626	0.63	1
g334.t1|TRAF4-HUMAN	-0.00639748	0.013	0.016	1
g4091.t1|SYT14-HUMAN	-0.000391117	0.004	0.003	1
g29250.t1|CDKL5-MOUSE	-0.0717097	0.137	0.144	1
g13741.t1|MEC2-CAEEL	0.00178328	0.091	0.082	1
g17795.t1|MEP1B-MOUSE	0.00369039	0.002	0.001	1
g13002.t1|CALM-EUGGR	-0.0446542	0.468	0.47	1
g6835.t1|ATHL1-DANRE	0.101216	0.09	0.084	1
g4634.t2|ENTP1-HUMAN	-0.00355815	0.006	0.008	1
g30378.t1|TSN31-RAT	0.00505988	0.037	0.032	1
g25982.t1|YWRD-BACSU	0.0249945	0.02	0.017	1
g17172.t1|LRRK2-MOUSE	-0.00414614	0.006	0.008	1
g22214.t1|GAS2-MOUSE	0.0189016	0.023	0.019	1
g7439.t1|BT3L4-DANRE	0.0476478	0.812	0.794	1
g85.t1|NCOR2-MOUSE	-0.00479945	0.275	0.261	1
g10369.t1|MYPH-ECHGR	-0.0175374	0.208	0.194	1
g28616.t1|TCPR1-MOUSE	0.00546262	0.075	0.068	1
g7667.t1|PKHL1-MOUSE	0.00402266	0.009	0.006	1
g15141.t1|TM201-DANRE	0.00560827	0.063	0.057	1
g25362.t1|MEGF6-RAT	-0.00482181	0.008	0.005	1
g10186.t1|OPSX-HUMAN	0.00514665	0.01	0.007	1
g9102.t1|CDK6-HUMAN	0.0174194	0.039	0.034	1
g14529.t2|CDC45-XENLA	0.00111585	0.02	0.017	1
g30203.t1|CPNE8-MOUSE	-0.018105	0.146	0.155	1
g28212.t1|SUP9-CAEEL	-0.0278483	0.036	0.041	1
g11898.t1|RB27C-DROME	0.00277279	0.194	0.182	1
g4271.t1|TRAF3-MOUSE	-0.0153194	0.065	0.071	1
g18732.t2|NSMA3-DANRE	0.00228361	0.032	0.036	1
g9060.t1|EIF3H-NEMVE	-0.00579387	0.488	0.5	1
g32648.t1|TRM6-MOUSE	-0.0104857	0.202	0.213	1
g20637.t1|MEF2A-BOVIN	-0.0852007	0.309	0.314	1
g33594.t1|NPHP3-HUMAN	0.00328744	0.003	0.002	1
g6707.t1|SUSD2-HUMAN	0.00126041	0.003	0.002	1
g22560.t1|FXL13-HUMAN	-0.00163027	0	0.001	1
g15839.t1|THAP2-MOUSE	-0.00214196	0	0.001	1
g31307.t2|FBN1-PIG	0.000551188	0	0.001	1
g24611.t1|FMAR-DROME	-2.01114e-05	0	0.001	1
g9959.t2|YNV9-CAEEL	-0.00024853	0	0.001	1
g20816.t1|C163A-CANLF	-0.000549928	0	0.001	1
g22137.t1|5HT2A-PIG	-0.000964629	0	0.001	1
g8302.t1|BPTF-HUMAN	0.0318334	0.09	0.083	1
g30157.t2|LTOR3-TETNG	-0.0216582	0.199	0.187	1
g11925.t1|TRAF4-HUMAN	-0.140462	0.423	0.404	1
g657.t1|S23IP-HUMAN	-0.00221494	0.101	0.093	1
g19469.t1|AP3D1-MOUSE	-0.0127594	0.026	0.03	1
g32311.t1|DHTK1-PONAB	-0.0143181	0.049	0.043	1
g28146.t1|RL7A-TAKRU	-0.0459221	0.227	0.231	1
g16973.t1|NGB-CANLF	0.00489518	0.004	0.003	1
g12991.t1|RPA1-MOUSE	0.0106518	0.146	0.157	1
g18402.t1|CP4C1-BLADI	0.00150807	0.04	0.035	1
g20080.t1|PNPH-HUMAN	-0.0217809	0.675	0.665	1
g17395.t1|GLPK-RAT	-0.00563049	0.012	0.014	1
g20552.t1|VMP-NEMVE	0.00216985	0.011	0.009	1
g20857.t1|AGRD1-BOVIN	-0.000983743	0.005	0.004	1
g24583.t1|ENPP1-HUMAN	0.00739462	0.023	0.019	1
g5575.t1|RS21-DROYA	-0.0359974	0.68	0.668	1
g6008.t1|SPAN-STRPU	0.00435577	0.006	0.004	1
g28037.t1|SOX18-XENTR	0.00286521	0.006	0.004	1
g12276.t1|SPCS2-XENTR	-0.0420062	0.555	0.553	1
g19740.t1|MFNA-METPE	-0.00179158	0.006	0.008	1
g16876.t1|NAPA-NEMVE	-0.00278011	0.043	0.038	1
g25648.t1|SMG5-HUMAN	-0.00600444	0.017	0.02	1
g2061.t1|GPR98-MOUSE	0.000814308	0.006	0.008	1
g10327.t1|TAF1-HUMAN	-0.00753306	0.043	0.048	1
g17356.t1|ASPM-FELCA	-0.0160438	0.034	0.038	1
g10170.t1|HEXIM-XENLA	-0.0292285	0.364	0.339	1
g17345.t1|CHRD-XENLA	-0.0752766	0.181	0.185	1
g7652.t2|KI26A-MOUSE	-0.0585668	0.244	0.227	1
g3515.t1|BBIP1-NEMVE	0.00501833	0.029	0.026	1
g17787.t1|RAB38-HUMAN	-0.0242305	0.123	0.114	1
g22139.t1|ACM1-MACMU	0.00236606	0.002	0.001	1
g27484.t1|DMR3T-HORSE	0.000323435	0.001	0.002	1
g29332.t1|OPSD2-MIZYE	0.00383783	0.002	0.001	1
g15750.t1|CAC1B-DIPOM	0.0013001	0.002	0.001	1
g2223.t1|C209D-MOUSE	-0.00455986	0.002	0.001	1
g28961.t1|RHG18-MOUSE	0.00257766	0.209	0.199	1
g31681.t1|SUMF1-BOVIN	-0.0487111	0.17	0.159	1
g23223.t1|PK1L2-HUMAN	0.0240334	0.127	0.12	1
g3568.t1|BHMT1-MOUSE	0.0608396	0.342	0.339	1
g17453.t1|GID4-MOUSE	-0.0247323	0.073	0.078	1
g26858.t1|DRD1-XENLA	-0.0024788	0.014	0.017	1
g1881.t1|EMC8-HUMAN	-0.00383316	0.217	0.206	1
g14858.t1|PRC1-HUMAN	-0.021995	0.141	0.146	1
g6164.t1|CNTP2-HUMAN	0.00639463	0.011	0.009	1
g10295.t1|CCD34-HUMAN	-0.0214361	0.052	0.057	1
g7859.t1|PFLD-ECOLI	-0.0075287	0.019	0.016	1
g29846.t1|S2544-MOUSE	0.0105173	0.04	0.036	1
g26971.t1|BASI-CHICK	0.00831	0.011	0.009	1
g5483.t1|CTXA-CARAL	-0.000116031	0.005	0.006	1
g11351.t1|CO4A1-BOVIN	0.020799	0.07	0.076	1
g3530.t1|CTR1-HUMAN	0.00204476	0.005	0.006	1
g21119.t1|GBG2-PONAB	0.0014927	0.585	0.566	1
g14333.t1|PIWL1-HUMAN	-0.0394765	0.313	0.314	1
g14466.t1|SVOP-PONAB	0.0032766	0.009	0.007	1
g31867.t2|WRP73-HUMAN	-0.0114076	0.019	0.022	1
g24383.t1|GRM8-RAT	0.000670866	0.003	0.002	1
g503.t1|GAP1-SCHPO	-0.0367686	0.326	0.308	1
g15674.t1|NPFF2-HUMAN	0.0302937	0.048	0.044	1
g23371.t1|GAPR1-MOUSE	0.00128007	0.004	0.003	1
g25005.t1|AB22G-ARATH	-0.0340928	0.057	0.061	1
g16338.t1|DCST1-HUMAN	0.00146945	0.005	0.004	1
g23802.t1|NANO1-DANRE	-0.00240344	0.018	0.016	1
g15087.t1|CRYL1-RABIT	-0.00772618	0.36	0.362	1
g16981.t1|KITH-CHICK	0.00481725	0.019	0.022	1
g18360.t1|ANO10-HUMAN	-0.0226142	0.166	0.155	1
g28165.t1|SARDH-RAT	0.0113032	0.043	0.039	1
g10800.t2|BBOF1-MACFA	-0.00428075	0.006	0.008	1
g20581.t1|APLP-LOCMI	0.0222388	0.153	0.163	1
g14219.t1|SEPR-BOVIN	0.00208594	0.019	0.021	1
g18399.t1|CP4X1-HUMAN	0.00385382	0.013	0.011	1
g10221.t1|VPS11-HUMAN	0.00738366	0.021	0.019	1
g891.t1|EXOS8-HUMAN	0.0123356	0.365	0.345	1
g30358.t1|NAT6-HUMAN	-0.00466582	0.025	0.022	1
g29781.t1|DVL2-XENTR	-0.0112509	0.052	0.048	1
g27448.t1|CERK1-MOUSE	-0.00610449	0.077	0.072	1
g24621.t1|SSUH2-HUMAN	-0.0429601	0.182	0.172	1
g31033.t1|CAD96-DROME	0.0609526	0.122	0.119	1
g13847.t1|RBX1A-DROME	-0.0226404	0.139	0.132	1
g9045.t2|BRN3-CHICK	0.00367403	0.008	0.01	1
g23076.t1|RABL6-HUMAN	-0.0280447	0.268	0.275	1
g8972.t1|TMED9-MOUSE	-0.0725571	0.291	0.291	1
g32819.t1|RFA1-HUMAN	-0.00338637	0.01	0.012	1
g19984.t1|SKI-XENLA	0.00171484	0.264	0.253	1
g28348.t1|OPSD1-MIZYE	0.0694154	0.12	0.118	1
g14988.t1|SBP1-XENTR	-0.00492744	0.022	0.019	1
g19524.t1|PLD3-BOVIN	-0.00142897	0.035	0.032	1
g13600.t1|MEX3B-XENLA	-0.0597508	0.382	0.354	1
g33764.t1|GRM2-MOUSE	-0.0256666	0.056	0.059	1
g30037.t1|AB13C-ARATH	-0.00487623	0.022	0.019	1
g26299.t1|BIRC6-HUMAN	0.00600545	0.033	0.03	1
g18305.t1|TET1-MOUSE	0.0102414	0.03	0.027	1
g17309.t1|TEX2-HUMAN	-0.0145881	0.136	0.141	1
g27530.t1|KPCD1-HUMAN	-0.0141578	0.02	0.018	1
g32685.t1|ZN341-HUMAN	-0.00767873	0.099	0.094	1
g18355.t1|DDX21-HUMAN	0.0250942	0.216	0.225	1
g11880.t1|COOA1-HUMAN	0.0441391	0.059	0.063	1
g20127.t1|TPP2-MOUSE	-0.00293834	0.058	0.054	1
g3564.t1|FAT4-HUMAN	0.00838312	0.029	0.027	1
g17271.t1|EF2K-HUMAN	-0.0757009	0.392	0.387	1
g25284.t2|PRDM6-MOUSE	-0.02978	0.287	0.273	1
g20713.t1|RIMK-PELCD	0.0166362	0.14	0.136	1
g7007.t1|PUR2-CHICK	-0.00168644	0.079	0.074	1
g30332.t1|RM44-HUMAN	0.0158157	0.102	0.098	1
g21008.t2|KI16B-HUMAN	-0.0408103	0.308	0.297	1
g458.t1|HD-MOUSE	-0.00582908	0.046	0.043	1
g23411.t1|PRS6A-HUMAN	-0.0348017	0.57	0.56	1
g31924.t1|PPR3C-BOVIN	0.0932348	0.178	0.177	1
g14404.t1|GNPI1-HUMAN	-0.00792929	0.654	0.66	1
g13587.t1|PRLHR-RAT	-0.0017216	0.004	0.004	1
g16227.t1|NK2R-CAVPO	0.00115645	0.001	0.001	1
g1760.t1|RAB6B-MOUSE	0.00150124	0.001	0.001	1
g695.t1|Y612-RICPR	0.000626767	0.001	0.001	1
g15025.t1|HIP1R-HUMAN	0.000165666	0.001	0.001	1
g21372.t1|DHX8-HUMAN	-0.0071687	0.026	0.028	1
g6415.t1|YWV1-CAEEL	0.00391464	0.002	0.002	1
g23541.t1|DRGX-RAT	-0.0117229	0.004	0.005	1
g23177.t1|NFIC-MOUSE	-0.00729329	0.002	0.003	1
g27218.t1|IDD-MOUSE	-0.00195782	0.002	0.003	1
g14915.t1|TBCD-MOUSE	-0.00211711	0.024	0.022	1
g8206.t1|KLC4-MOUSE	-0.000106665	0.002	0.002	1
g21311.t1|OCT1-CAEEL	-0.00620853	0.002	0.002	1
g30756.t1|CEL3B-MOUSE	0.00238277	0.002	0.003	1
g5516.t1|MRP1-HUMAN	0.000463127	0.002	0.003	1
g4592.t1|SEN54-MOUSE	0.0052643	0.055	0.052	1
g1026.t1|GPN3-HUMAN	-0.0268982	0.199	0.189	1
g33270.t1|AP3B2-HUMAN	-0.0114476	0.486	0.47	1
g22646.t1|PHF8-DANRE	-0.0182186	0.128	0.122	1
g18954.t1|CDK20-DANRE	0.00206728	0.025	0.023	1
g7633.t1|PIGL-MOUSE	-0.039855	0.052	0.054	1
g28138.t1|RAB1B-MACFA	-0.0180197	0.129	0.124	1
g302.t1|STING-NEMVE	-0.00669634	0.008	0.007	1
g13108.t1|SGPL1-RAT	0.0312841	0.19	0.198	1
g7217.t1|S35F6-HUMAN	-0.00961574	0.057	0.059	1
g25230.t1|TPPC1-RAT	0.00923702	0.061	0.058	1
g5429.t1|RET-RAT	0.00215355	0.007	0.006	1
g31795.t1|HMP-OCEIH	0.0370101	0.256	0.253	1
g14750.t1|GARL3-HUMAN	-0.0956735	0.144	0.135	1
g20598.t1|STR6L-MOUSE	-0.00455376	0.004	0.004	1
g14049.t1|MPP10-HUMAN	-0.0314531	0.175	0.176	1
g14037.t1|GMHA-SULDN	0.00260246	0.02	0.019	1
g16845.t1|FUT3-BOVIN	0.011093	0.016	0.015	1
g22230.t1|RASF1-MOUSE	-0.00348617	0.069	0.066	1
g11767.t1|VRK1-DANRE	-0.0255629	0.119	0.113	1
g4076.t1|IF2-ACTPJ	0.000406714	0.028	0.03	1
g15494.t1|VWDE-HUMAN	0.00040552	0.001	0.002	1
g1463.t1|DVR1-STRPU	0.00305154	0.001	0.002	1
g29740.t1|PRI2-MOUSE	-0.0154338	0.041	0.043	1
g24125.t1|EZH2-MACFA	0.00742386	0.034	0.032	1
g743.t1|DYH2-MOUSE	0.00964626	0.009	0.008	1
g24500.t1|SSU72-DANRE	-0.0266475	0.446	0.445	1
g10854.t2|TGT-XENLA	-0.00730084	0.06	0.058	1
g19369.t1|DPYD-BOVIN	-0.00736878	0.005	0.004	1
g4300.t1|GOPC-MOUSE	-0.0369423	0.287	0.287	1
g20774.t1|Y103-SYNY3	-0.114692	0.391	0.37	1
g6659.t1|SAP3-MACFA	0.00354631	0.007	0.008	1
g24190.t1|BICD2-MOUSE	-0.0193003	0.05	0.048	1
g2479.t1|CD022-XENLA	0.00295326	0.009	0.01	1
g21581.t1|BARD1-HUMAN	0.00519275	0.009	0.01	1
g29109.t1|HUS1-HUMAN	-0.00123798	0.004	0.004	1
g24894.t1|MIC19-HUMAN	0.00954921	0.521	0.516	1
g22057.t1|RAB32-HUMAN	-0.0205246	0.085	0.086	1
g21761.t1|DMRT2-HUMAN	0.00202257	0.003	0.004	1
g18806.t1|ATX2-ARATH	0.0372381	0.046	0.045	1
g22186.t1|ADA1A-ORYLA	-0.0444889	0.082	0.083	1
g33465.t1|PRI1-MOUSE	0.00963377	0.031	0.029	1
g835.t1|C19L2-HUMAN	-0.012989	0.13	0.127	1
g18952.t1|ATS3-HUMAN	0.0299699	0.046	0.048	1
g21901.t1|ABCA2-HUMAN	0.00951544	0.096	0.093	1
g11659.t1|HPS4-HUMAN	-0.00418385	0.02	0.019	1
g20662.t1|CRTC1-HUMAN	-0.052095	0.148	0.146	1
g13803.t1|FLAD1-XENLA	-0.00713208	0.059	0.06	1
g32336.t1|THAP9-HUMAN	0.00702564	0.013	0.012	1
g27198.t1|RPF1-PONAB	0.0186984	0.26	0.259	1
g24677.t1|HHEX-HUMAN	0.0186181	0.075	0.078	1
g18228.t1|SCUB2-DANRE	-0.000792176	0.001	0.001	1
g6548.t1|MARH6-MOUSE	-0.00450296	0.001	0.001	1
g25557.t1|OPN3-HUMAN	-0.00727184	0.001	0.001	1
g18921.t1|DAZL-DANRE	7.75305e-05	0.001	0.001	1
g17003.t1|CHIA-RAT	0.00364024	0.001	0.001	1
g29661.t1|UBXN7-MOUSE	0.0110901	0.164	0.162	1
g32915.t1|MESH1-XENTR	-0.0532582	0.354	0.342	1
g10320.t1|WDR36-HUMAN	-0.00222807	0.03	0.028	1
g16998.t1|SUV92-CHICK	0.0043703	0.039	0.037	1
g14003.t2|BMPR2-MOUSE	-0.0383107	0.083	0.084	1
g6387.t1|MDR1-HUMAN	-0.011517	0.03	0.031	1
g14688.t1|KIF7-DICDI	-0.0791206	0.205	0.2	1
g31890.t1|XRN1-MOUSE	0.00285591	0.022	0.021	1
g8566.t1|APOB-MOUSE	0.0441239	0.101	0.102	1
g28509.t1|KHK-RAT	-0.00592369	0.025	0.024	1
g12906.t1|IRF8-HUMAN	-0.0163466	0.05	0.049	1
g29640.t1|TNPO1-MOUSE	-0.0048794	0.014	0.013	1
g8329.t1|LMBL3-MOUSE	-0.0418731	0.137	0.137	1
g6401.t1|ZFN2A-HUMAN	-0.0206708	0.042	0.043	1
g2642.t1|NPHP3-HUMAN	-0.00142057	0.002	0.003	1
g1533.t1|ABCA7-HUMAN	0.00279973	0.002	0.003	1
g621.t1|FGF8B-DANRE	0.0089243	0.006	0.006	1
g9542.t1|DCC1-XENTR	-0.00804106	0.037	0.038	1
g69.t1|TLL1-DANRE	-0.00416915	0.018	0.018	1
g33381.t1|MMS19-XENTR	0.00305499	0.005	0.004	1
g16373.t1|BAZ1A-XENLA	-0.0290009	0.251	0.244	1
g30671.t1|TSEAR-MOUSE	-0.00239916	0.008	0.007	1
g13898.t1|KIF1A-ANOGA	0.0553274	0.482	0.479	1
g24023.t1|LS14B-XENTR	-0.0123685	0.566	0.541	1
g12585.t1|SVEP1-MOUSE	0.00584209	0.017	0.017	1
g29496.t1|FNIP1-CHICK	0.00550054	0.021	0.022	1
g21270.t1|KPSH1-BOVIN	0.00749495	0.024	0.025	1
g27772.t1|BGB-DROME	0.0325962	0.131	0.131	1
g5881.t1|KCNH6-HUMAN	-0.00167269	0.009	0.009	1
g29510.t1|CHIP-CHICK	-0.000209822	0.097	0.097	1
g24071.t1|5HT7R-RAT	-0.00228554	0.004	0.004	1
g27999.t1|RSF1-HUMAN	-0.0432556	0.224	0.221	1
g19470.t1|ELAV3-XENLA	-0.0455179	0.224	0.218	1
g247.t1|RPAC1-HUMAN	-0.0127868	0.093	0.091	1
g7978.t1|S35A3-CANLF	-0.0126661	0.079	0.078	1
g26795.t1|OXIR-STRAT	-0.00304721	0.013	0.013	1
g11155.t1|H2B7-CHICK	-0.00548436	0.026	0.027	1
g10165.t1|CAFF-RIFPA	0.157171	0.356	0.358	1
g16444.t1|SRPK1-PONAB	-0.00716212	0.229	0.222	1
g21065.t1|DNJB9-PONAB	-0.0572037	0.508	0.496	1
g15990.t1|U3IP2-MOUSE	-0.0298749	0.181	0.176	1
g571.t1|BAT1-MOUSE	0.000342338	0.008	0.008	1
g11670.t1|BGLR-PIG	0.0347257	0.155	0.159	1
g31064.t1|KRBA2-HUMAN	-0.0573679	0.145	0.141	1
g30297.t1|NPC2-DROME	0.00709856	0.016	0.016	1
g9460.t1|SAP3-HUMAN	0.013834	0.014	0.014	1
g18336.t1|PP2BA-RAT	-0.0294344	0.31	0.301	1
g32857.t1|TENX-HUMAN	-0.000970034	0.002	0.002	1
g1616.t1|OPN4B-XENLA	0.000468073	0.002	0.002	1
g31511.t1|OGFR-MOUSE	-0.00125296	0.002	0.002	1
g22737.t1|MRC1-HUMAN	-0.000419004	0.002	0.002	1
g8672.t1|ANR28-MOUSE	0.00617494	0.01	0.01	1
g24962.t1|DCL1-COCIM	-0.00855983	0.074	0.074	1
g2220.t1|GACZ-DICDI	0.00165307	0.003	0.003	1
g5261.t1|COG6-RAT	-0.00760514	0.017	0.017	1
g32680.t1|C56D2-BOVIN	-0.0479901	0.191	0.186	1
g29628.t3	-0.0191649	0.01	0.01	1
g14552.t1|GPTC4-XENLA	0.0119923	0.587	0.579	1
g2360.t2|PDE9A-HUMAN	-0.00990251	0.216	0.212	1
g20604.t1|FKBP4-SPOFR	0.00104712	0.042	0.042	1
g16622.t1|CFA20-HUMAN	-0.0398081	0.146	0.143	1
g27571.t1|CB076-MOUSE	0.00306281	0.05	0.05	1
g8921.t1|HNRPQ-HUMAN	-0.0354751	0.568	0.539	1
g28309.t1|MFSD3-RAT	-0.0417611	0.131	0.128	1
g13686.t1|KLC-DROME	0.00120144	0.004	0.004	1

## Sheet: SC.12
ID	LogFC	Percent Positive, Head Cells	Percent Positive, Foot Cells	Adjusted P-value
g2198.t1|K1958-HUMAN	-1.74497	0.005	0.478	0
g2771.t1|APCD1-CHICK	-1.90706	0.097	0.679	0
g9819.t1|CSL3-ONCKE	-4.51345	0.031	0.6	0
g4917.t1|TLD-DROME	-0.942749	0.008	0.43	7.41553e-287
g9565.t1|DNMT1-PARLI	-2.17284	0.09	0.57	1.23911e-270
g23753.t1|WAK3-ARATH	-1.99778	0.003	0.384	1.6146e-262
g1751.t1|APX1-HYDVD	-3.06558	0.004	0.376	1.39887e-254
g19689.t1|ELEL-ECHLU	-3.8572	0.017	0.387	9.87973e-234
g15631.t1|VP302-LYCMC	-1.78451	0.001	0.314	4.35795e-215
g19688.t1|LPHN-DROMO	-2.52267	0.003	0.312	5.98711e-207
g21027.t1|SFRP3-MOUSE	-1.23997	0.006	0.321	9.64435e-206
g27773.t1|PEBB-HUMAN	-0.710457	0.01	0.335	1.91374e-205
g15630.t1|KCP4-PINMG	-1.59152	0.002	0.304	2.44605e-204
g29807.t1|BLC-VIBCH	-1.73003	0.083	0.461	6.97476e-185
g6567.t1|GLT13-RAT	-1.13865	0.011	0.275	1.01516e-161
g3710.t2|ANTA-HYDVU	-1.31505	0.053	0.372	2.12516e-157
g24207.t1|CHIT3-DROME	-0.922127	0.003	0.243	2.49763e-156
g21159.t1|RSGI5-CLOTH	-1.30237	0	0.229	6.75149e-153
g20995.t1|GST-NOTSL	2.58734	0.579	0.157	1.51775e-152
g33666.t1|AGRG4-HUMAN	-1.03565	0.016	0.279	2.49385e-152
g32158.t1|LOX5-MESAU	-1.201	0.075	0.403	1.29625e-151
g28682.t1|CALM-METSE	1.22688	0.763	0.407	6.67842e-151
g12342.t1|DRD2-MUSPF	-0.818722	0.024	0.298	1.10231e-148
g33506.t1|TIC32-ARATH	-0.856581	0.001	0.224	5.28379e-148
g20399.t1|CO4A1-HUMAN	1.24883	0.439	0.004	7.35992e-146
g29750.t1|WNT2B-CHICK	1.58866	0.442	0.008	9.57078e-145
g267.t1|GABP2-BOVIN	-0.753273	0.001	0.221	1.84735e-144
g9713.t2|TENA-CHICK	-0.70039	0.001	0.216	2.19593e-142
g10680.t1|KCP4-PINMG	-1.43203	0.171	0.532	2.2425e-139
g10604.t1|CEBPA-HUMAN	0.535559	0.973	0.89	1.05277e-136
g23421.t1|IABF-STRAW	-0.686861	0.011	0.244	1.29382e-135
g6131.t1|CP17A-ICTPU	-0.957656	0.117	0.448	1.58379e-134
g23065.t1|KAD5-BOVIN	1.24703	0.544	0.135	1.68854e-134
g12476.t1|BAT36-CAEEL	-0.994942	0.033	0.294	3.09032e-129
g28449.t1|FD4-DROME	-0.540491	0.027	0.252	8.37244e-111
g31923.t1|INX3-DROME	0.896489	0.561	0.184	3.18633e-110
g13250.t1|AHV-ACTSK	-0.677375	0.138	0.428	3.59136e-97
g11696.t1|TPM1-HYDVU	1.60121	0.418	0.082	2.84511e-96
g24191.t1|FA5-BOVIN	0.875905	0.366	0.035	3.81296e-96
g3704.t1|FRIS-LYMST	0.540705	0.99	0.962	1.91391e-95
g8233.t1|USPAL-ARATH	-0.413347	0.001	0.152	5.26485e-95
g21993.t1|MYS-ARGIR	1.3833	0.559	0.247	1.15621e-93
g26351.t2|CPO-DROME	0.933974	0.365	0.042	1.36497e-92
g22983.t1|CAMT2-DICDI	0.966673	0.411	0.08	1.10276e-90
g15636.t1|FRIS-LYMST	0.759748	0.99	0.974	3.12712e-87
g22870.t1|GGT1-RAT	-0.814597	0.069	0.292	5.55169e-85
g2038.t1|GRM7-RAT	0.71985	0.314	0.019	3.62838e-84
g21995.t1|MYS-PODCA	1.31927	0.523	0.215	9.69264e-84
g5415.t1|GFI1B-CHICK	-0.467437	0.002	0.136	1.9219e-82
g16224.t1|QRFPR-HUMAN	-0.389761	0.006	0.152	3.69207e-82
g14145.t1|JPH1-RABIT	-0.564965	0.208	0.504	6.44569e-81
g31462.t1|ACT-HYDVU	0.465459	0.997	0.957	5.28055e-80
g12894.t1|RHES-HUMAN	-1.02639	0.045	0.242	3.37819e-79
g19602.t1|RUNX1-MOUSE	-0.384365	0.012	0.165	3.61746e-79
g2114.t1|TITIN-MOUSE	-0.337282	0.002	0.129	1.82695e-78
g18873.t1|SPXM2-ORYSJ	-0.454448	0.017	0.177	3.41121e-78
g24070.t1|TMOD1-RAT	1.51597	0.407	0.12	1.12655e-77
g33661.t1|CPEB1-PONAB	-0.730129	0.629	0.796	4.13837e-77
g3763.t1|DD3-DICDI	1.23571	0.287	0.014	4.60342e-77
g27585.t1|DIRA-CAEEL	-0.467478	0.017	0.176	6.96411e-77
g1591.t1|ROR1-HUMAN	0.888835	0.38	0.086	5.4853e-76
g28992.t1|EGL4-CAEEL	0.886705	0.423	0.128	1.2596e-75
g296.t1|ESRP1-RAT	-0.733183	0.088	0.304	1.89853e-73
g3847.t1|DMTA2-XENTR	0.64451	0.414	0.109	1.02183e-72
g18277.t1|GAPR1-HUMAN	2.01324	0.306	0.042	7.31479e-71
g17914.t1|FCA1-TRYRA	-0.523006	0.951	0.975	2.57051e-70
g10761.t1|B3GN4-HUMAN	0.670692	0.354	0.073	1.00748e-69
g31235.t1|TPM1-PODCA	0.456371	0.967	0.943	1.24912e-69
g30865.t1|PXDN-DROME	0.604226	0.371	0.087	1.84171e-68
g12730.t1|DIRA2-MOUSE	-0.471245	0.016	0.159	3.14082e-68
g27630.t1|THIO-PLAF7	0.552098	0.951	0.933	4.32514e-68
g29424.t1|LICD-HAEIN	-0.409655	0.034	0.204	1.00216e-67
g28515.t1|CATL-SARPE	0.740819	0.831	0.496	1.68738e-66
g10944.t1|RHOC-CHICK	-0.514939	0.139	0.38	5.50549e-66
g11275.t1|TYB4-RAT	0.378341	0.967	0.695	6.3819e-66
g27778.t1|LAMC-DROME	1.69776	0.278	0.03	7.60746e-65
g33315.t1|ZN474-HUMAN	-0.782737	0.191	0.416	2.61457e-64
g710.t1|RTXE-DROME	-0.299609	0.001	0.104	6.31033e-63
g29371.t1|B3GN4-HUMAN	0.529048	0.261	0.021	8.37287e-63
g26642.t1|FBN2-MOUSE	1.14732	0.518	0.274	2.83388e-62
g18245.t1|DLLH-BRAFL	-0.381232	0.025	0.17	1.58841e-61
g18779.t1|NPY4R-MOUSE	-0.409123	0.016	0.148	2.63222e-61
g18297.t1|BLC-VIBCH	0.758259	0.382	0.12	6.7721e-61
g9551.t1|KS1-HYDVU	1.76482	0.232	0.008	7.15726e-61
g24685.t1|RAPB-DICDI	-0.304529	0.015	0.146	9.51792e-61
g17392.t1|SAXO1-MACFA	1.1348	0.255	0.024	7.7087e-60
g16165.t1|ZIC4-MOUSE	0.42501	0.232	0.012	1.39203e-57
g20991.t1|GST-NOTSL	0.540461	0.242	0.021	1.0727e-56
g28064.t1|WNT3-MOUSE	0.793345	0.22	0.008	1.23862e-56
g21085.t1|HPCL1-HUMAN	-0.645549	0.095	0.29	1.82061e-56
g15181.t1|PLPP3-BOVIN	-0.473698	0.072	0.255	2.43031e-56
g234.t1|CALM-SCHPO	1.44694	0.44	0.206	3.27031e-56
g4828.t1|OAT-HUMAN	0.636174	0.292	0.057	1.25624e-55
g21347.t1|PZP-MOUSE	-1.08802	0.155	0.369	3.91076e-55
g22731.t1|LAMP1-HUMAN	0.591495	0.418	0.166	1.99468e-51
g26297.t1|MCAF1-HUMAN	0.644967	0.228	0.022	4.57719e-51
g33445.t1|MYLK-BOVIN	0.745263	0.497	0.284	8.28538e-50
g21219.t1|MYPT1-CHICK	-0.884419	0.147	0.345	2.45189e-49
g2621.t1|RSH4A-MOUSE	0.572787	0.458	0.211	1.01605e-48
g24114.t1|OTX2-XENTR	0.384602	0.268	0.054	1.98539e-46
g21983.t1|GDIR1-RAT	0.339354	0.894	0.796	5.42282e-46
g19572.t1|CATZ-RAT	0.466083	0.756	0.565	6.60393e-46
g29418.t1|CRIP1-RAT	0.416871	0.313	0.091	1.28103e-45
g453.t1|HUTH-RAT	0.539732	0.285	0.074	2.54729e-45
g31517.t1|HMCN1-HUMAN	0.619001	0.3	0.087	6.15903e-45
g15603.t1|RDH11-MOUSE	0.507493	0.429	0.188	1.1024e-44
g24483.t1|DCC-MOUSE	0.806815	0.24	0.045	1.62691e-44
g18227.t1|RAX2-PANTR	0.380828	0.205	0.019	1.80375e-44
g13470.t1|MLC2-DROME	0.35017	0.935	0.831	3.31056e-44
g5414.t1|CGAS-NEMVE	0.487314	0.611	0.365	3.62339e-44
g27334.t1|GLNA-PANAR	1.20888	0.219	0.033	1.9281e-43
g15676.t1|GLNA-ACOCA	0.981841	0.208	0.027	8.0236e-42
g16222.t1|BMP7-MOUSE	-0.145	0.002	0.076	1.17942e-41
g27363.t1|ODP2-HUMAN	0.576401	0.634	0.43	1.21729e-41
g31345.t1|RISC-HUMAN	0.472337	0.502	0.271	3.03231e-41
g33396.t1|OTX5-XENTR	-0.243619	0.018	0.122	3.04442e-41
g1745.t1|RN145-DANRE	-0.31457	0.017	0.12	3.51299e-41
g16770.t1|RS6-BRAFL	-0.189755	0.996	0.999	3.80452e-41
g15825.t1|SY65-APLCA	0.344608	0.211	0.03	6.80028e-41
g8768.t1|HXA9B-TAKRU	0.443008	0.253	0.059	1.64835e-40
g2115.t1|CFA43-HUMAN	-0.502029	0.055	0.194	2.01829e-40
g9994.t1|RS11-MAGSA	0.517638	0.265	0.069	3.84557e-40
g14345.t2|GST-NOTSL	0.978772	0.252	0.069	4.6734e-39
g9945.t1|S2611-BOVIN	-0.226142	0.005	0.082	1.58078e-38
g29638.t2|TENA-CHICK	0.395435	0.241	0.056	3.40564e-38
g22879.t1|CAPSL-HUMAN	-0.792292	0.345	0.504	5.71605e-38
g25772.t1|CYT-CHIGU	-1.6726	0.02	0.118	2.84516e-37
g14380.t1|NCF2-BOVIN	0.357508	0.191	0.026	8.14038e-37
g19812.t1|KS1-HYDVU	0.868595	0.149	0.004	1.35468e-36
g33477.t1|MYPH-ECHGR	-0.41693	0.536	0.704	2.14292e-36
g4074.t1|EF1G-RABIT	-0.263204	0.931	0.971	3.0528e-36
g472.t1|OX2R-CANLF	-0.151266	0.001	0.064	3.67051e-36
g1680.t1|AT5G2-RAT	0.187552	0.994	0.988	6.2881e-36
g29389.t1|CAS4-EPHMU	0.295281	0.172	0.018	3.57606e-35
g23657.t1|SPRE-BOVIN	0.441367	0.322	0.123	3.83035e-34
g29578.t1|MAD1-MOUSE	0.489464	0.51	0.314	6.96434e-34
g33422.t1|SP4-MOUSE	0.51786	0.406	0.207	2.77611e-33
g18027.t1|TRAF4-HUMAN	0.30965	0.169	0.02	4.44633e-33
g5297.t2|FLNA-MOUSE	0.448019	0.406	0.201	6.9527e-33
g29454.t1|Y1101-SYNY3	0.29971	0.793	0.618	9.06067e-33
g27082.t1|RIMB2-MOUSE	0.52277	0.228	0.061	1.47426e-32
g79.t1|ZN436-HUMAN	0.569913	0.419	0.231	1.78207e-32
g1127.t1|ANR10-HUMAN	0.359135	0.281	0.094	1.99782e-32
g26840.t1|ZN703-XENTR	0.338951	0.165	0.019	2.92987e-32
g6354.t2|UAP1-MOUSE	-0.463367	0.409	0.574	8.02011e-32
g10324.t2|MYPT2-HUMAN	0.351909	0.746	0.578	8.13626e-32
g21411.t1|SYT12-HUMAN	-0.333441	0.071	0.204	8.60301e-32
g27140.t1|DIRA2-HUMAN	-0.302044	0.033	0.138	9.14545e-32
g9524.t1|HEXA-PONAB	0.406164	0.655	0.477	1.07215e-31
g29675.t1|S22A7-MOUSE	0.290213	0.221	0.055	3.8266e-31
g24596.t1|GLRX-RICCO	0.295501	0.825	0.693	7.25356e-31
g16790.t1|RS17-COTJA	-0.177598	0.989	0.999	1.04238e-30
g19253.t1|CALB2-RAT	0.559961	0.161	0.02	1.86794e-30
g31231.t2|PHAR4-CHICK	0.412558	0.167	0.026	6.93729e-30
g30709.t1|GILT-BOVIN	0.899478	0.421	0.235	8.75066e-30
g30995.t1|PTPRS-RAT	-0.209949	0.013	0.09	1.96325e-29
g16428.t2|KAP2-BOVIN	-0.577429	0.153	0.297	2.55525e-29
g17529.t1|KDM1A-MOUSE	-0.738893	0.095	0.227	4.02673e-29
g20410.t1|KCA10-CHICK	0.308112	0.131	0.007	4.61652e-29
g11694.t1|TPM1-HYDVU	0.198941	0.994	0.977	4.86125e-29
g20911.t1|GATA2-XENLA	-0.192177	0.017	0.098	8.2098e-29
g587.t1|OPSD-NEOAU	-0.221471	0.016	0.096	1.27182e-28
g5735.t1|RHG06-MOUSE	0.434394	0.235	0.074	1.94352e-28
g9694.t1|FGF1-CYNPY	0.683072	0.334	0.153	3.26288e-28
g14028.t1|TM104-CHICK	0.352052	0.352	0.172	4.78115e-28
g15223.t1|MFSD8-MOUSE	0.271458	0.196	0.046	5.66379e-28
g19513.t1|RS8-SPOFR	-0.188532	0.979	0.993	6.20679e-28
g29482.t1|RHAG-HUMAN	0.26929	0.18	0.038	8.62547e-28
g3098.t1|CATC-HUMAN	0.359927	0.69	0.526	1.17755e-27
g24952.t1|BRAC-HUMAN	0.524251	0.144	0.017	1.38184e-27
g29448.t1|MYPH-ECHGR	0.458197	0.753	0.57	1.81568e-27
g22933.t1|KCNQ5-HUMAN	0.290902	0.181	0.039	2.36214e-27
g6320.t1|AT1A-HYDVU	0.370392	0.4	0.221	4.38559e-27
g28117.t1|CO6A6-HUMAN	0.651277	0.18	0.043	1.09994e-26
g12274.t1|FRIZ2-CAEEL	-0.581055	0.088	0.215	1.39246e-26
g8000.t1|LHX5-XENLA	-0.134774	0	0.044	3.33653e-26
g17917.t1|FCA1-TRYRA	0.564832	0.157	0.027	4.34585e-26
g17905.t1|FBN3-HUMAN	0.288083	0.193	0.051	9.90703e-26
g28367.t1|TRAF3-MOUSE	0.451266	0.244	0.088	1.05469e-25
g22533.t1|TBA1C-HUMAN	0.480646	0.136	0.016	1.55645e-25
g33531.t1|PROF-HELCR	0.17606	0.995	0.98	1.79043e-25
g26654.t1|SYPL1-MOUSE	0.301993	0.233	0.077	2.69005e-25
g24017.t1|B3GN4-HUMAN	0.282088	0.25	0.091	3.19126e-25
g6167.t1|PCKGM-MOUSE	0.456808	0.202	0.06	4.26808e-25
g17328.t1|PRR5-RAT	0.395193	0.318	0.148	4.89871e-25
g4003.t1|PTPR2-RAT	-0.597505	0.409	0.545	5.1685e-25
g31198.t1|UT2-MOUSE	0.232686	0.161	0.032	5.93255e-25
g24329.t1|LWA-HYDEC	-1.18015	0.168	0.313	7.96202e-25
g15614.t1|ABHDB-DANRE	0.479405	0.479	0.318	8.67701e-25
g2616.t1|Y381-RICFE	0.243314	0.172	0.038	8.8155e-25
g30243.t1|MYPH-ECHGR	0.305163	0.116	0.007	1.48954e-24
g18831.t2|ACH10-CHICK	0.205691	0.121	0.01	2.01998e-24
g12122.t1|MMP14-BOVIN	-0.287733	0.054	0.16	2.08878e-24
g7994.t1|FRIH-TRENE	0.336665	0.951	0.929	2.1458e-24
g25018.t1|PDCD4-CHICK	-0.379478	0.388	0.547	3.48629e-24
g25556.t1|A30BL-HUMAN	0.162561	0.115	0.007	3.68345e-24
g30386.t1|VENT1-XENTR	0.184634	0.104	0.002	5.08876e-24
g13998.t1|THAP9-HUMAN	-0.209522	0.014	0.083	6.33905e-24
g12732.t1|CAR11-MOUSE	-0.311141	0.2	0.363	1.18225e-23
g27138.t1|NCF2-BOVIN	0.227469	0.128	0.015	2.16546e-23
g20603.t1|NRBP-MOUSE	0.238623	0.123	0.012	2.19216e-23
g11295.t1|G3ST1-HUMAN	0.263739	0.118	0.011	3.65458e-23
g29790.t1|DAPK3-RAT	0.436791	0.408	0.244	3.94938e-23
g5157.t1|AMPP1-ASPNC	-0.183003	0.033	0.12	4.05952e-23
g1366.t1|MMP25-HUMAN	-0.31583	0.069	0.179	4.36762e-23
g1742.t1|OPN4-PHOSU	-0.0967696	0.009	0.067	5.86411e-23
g29159.t1|AFAD-HUMAN	0.406152	0.744	0.61	8.33494e-23
g12949.t1|GIMA7-HUMAN	0.347173	0.301	0.142	8.61471e-23
g19213.t1|PLBL2-HUMAN	0.322901	0.727	0.545	1.09678e-22
g15907.t1|SYT7-HUMAN	0.396331	0.509	0.352	1.25377e-22
g15387.t1|DMX1B-DANRE	-0.296353	0.065	0.173	1.27978e-22
g20378.t1|ADIPL-XENTR	0.461612	0.133	0.021	3.86069e-22
g11044.t1|ENTK-HUMAN	-0.124685	0.004	0.054	6.11203e-22
g4061.t1|PRY1-YEAST	0.252064	0.105	0.006	8.9738e-22
g3304.t1|FKB12-DROME	0.205333	0.932	0.876	1.17284e-21
g10121.t1|DRD2L-DROME	-0.126973	0.013	0.077	1.18528e-21
g28700.t1|MPRG-HUMAN	0.224492	0.139	0.026	1.47042e-21
g13247.t1|AHV-ACTSK	-0.191004	0.032	0.114	2.39415e-21
g10300.t1|B4GN4-HUMAN	0.200467	0.108	0.009	3.0567e-21
g13585.t1|GPR19-HUMAN	-0.0737322	0.006	0.057	4.46365e-21
g6753.t1|TBB4B-MOUSE	1.13803	0.392	0.255	5.41644e-21
g16011.t1|TCNA-TRYCR	-0.340412	0.054	0.151	5.79238e-21
g31079.t1|ANK3-MOUSE	0.181312	0.108	0.01	7.05799e-21
g10018.t1|COFI-GIBZE	0.162374	0.98	0.968	8.36424e-21
g1889.t1|RL26-LITLI	-0.157508	0.988	0.992	8.68796e-21
g13182.t1|ASIC3-HUMAN	0.239954	0.141	0.029	1.34116e-20
g4769.t1|ELOV5-XENTR	0.251393	0.201	0.068	1.50901e-20
g16791.t1|RGMA-MOUSE	-0.292111	0.457	0.607	1.92124e-20
g12522.t1|RL22-CAEEL	-0.15833	0.988	0.986	2.05319e-20
g12768.t1|KGP1-HUMAN	0.312555	0.476	0.316	2.34774e-20
g32638.t1|IRF2-CHICK	0.277012	0.526	0.333	2.56416e-20
g33471.t1|CDK14-CALJA	-0.148316	0.013	0.074	3.29921e-20
g31685.t1|CFAD-DICDI	0.383644	0.801	0.649	4.06676e-20
g20802.t1|RLA2-CRYST	-0.135291	0.988	0.993	4.42321e-20
g9693.t1|CAS4-EPHMU	0.198834	0.096	0.005	9.9325e-20
g21780.t1|ACT-HYDVU	0.155681	1	0.996	1.91023e-19
g17363.t1|FAT4-MOUSE	0.257587	0.17	0.05	2.23604e-19
g245.t1|NDRG3-BOVIN	0.241509	0.258	0.112	2.44562e-19
g3221.t1|FGRL1-CHICK	0.980546	0.247	0.125	3.13854e-19
g24771.t1|KAPCA-HUMAN	-0.68433	0.498	0.578	3.37173e-19
g9269.t1|FHL2-HUMAN	-0.400193	0.339	0.478	4.1403e-19
g31477.t1|KCNAW-DROME	-0.078477	0.001	0.036	4.5827e-19
g6142.t1|TCB2-CAEBR	-0.0661946	0.001	0.036	4.90347e-19
g2834.t2|GXCDD-DICDI	0.281302	0.255	0.115	5.46131e-19
g17998.t1|CRYAB-BOVIN	0.229019	0.951	0.922	6.13938e-19
g9879.t1|MTH2-DROYA	-0.0934519	0.012	0.069	6.15376e-19
g5972.t1|GHC1-BOVIN	0.245785	0.228	0.093	7.38817e-19
g12373.t1|DIRA2-MACFA	0.322083	0.094	0.006	7.40411e-19
g11502.t1|CELR2-RAT	0.246264	0.135	0.029	8.60504e-19
g21782.t1|CPNS1-BOVIN	-0.175189	0.013	0.071	9.77415e-19
g33373.t1|WNT7B-HUMAN	0.965675	0.085	0.002	1.01549e-18
g371.t1|ST17A-RABIT	0.304022	0.717	0.596	1.08993e-18
g17298.t1|KAP1-MOUSE	-0.641905	0.396	0.493	1.39447e-18
g15894.t1|DUT-RHILW	0.321289	0.246	0.11	1.44314e-18
g33731.t1|TMOD2-RAT	-0.238491	0.219	0.37	1.50444e-18
g14229.t1|GREM2-HUMAN	0.169721	0.133	0.027	1.52813e-18
g13058.t1|SODC-CAMDR	0.563128	0.374	0.221	1.94864e-18
g8639.t3|SRBS2-MOUSE	0.2858	0.265	0.121	2.02491e-18
g30066.t1|FUT3-BOVIN	-0.187919	0.016	0.076	3.53695e-18
g30572.t1|SCRY2-OCTVU	0.394741	0.526	0.385	4.55102e-18
g6750.t1|TBB-PARLI	-0.25348	0.951	0.978	1.51471e-17
g24028.t1|B3GN4-HUMAN	-0.0762101	0	0.031	1.7331e-17
g4922.t1|MACF1-RAT	0.30886	0.463	0.307	2.09029e-17
g5578.t1|FOXI1-XENTR	0.375781	0.08	0.002	2.22369e-17
g23416.t1|MCL1-FELCA	0.297477	0.596	0.449	3.24447e-17
g14938.t1|AXIN1-HUMAN	0.241047	0.209	0.084	3.66266e-17
g18449.t1|PHLB2-HUMAN	-0.560495	0.397	0.486	3.67474e-17
g3486.t1|CHIT1-HUMAN	0.311228	0.408	0.256	1.13661e-16
g10509.t1|CISD1-RAT	0.30024	0.584	0.451	1.15837e-16
g21174.t1|CAN3-PIG	0.133973	0.12	0.024	1.32557e-16
g33220.t1|CSRP2-HUMAN	-0.31114	0.381	0.508	1.44439e-16
g6007.t1|SAP-HUMAN	0.307711	0.727	0.577	2.38476e-16
g20465.t1|CSK21-MOUSE	0.353728	0.441	0.301	2.39987e-16
g6875.t1|VATG-MANSE	0.195806	0.901	0.834	2.82464e-16
g19454.t1|CALM5-ARATH	-0.18953	0.051	0.136	3.8198e-16
g31435.t1|NPY2R-MOUSE	-0.104725	0.055	0.145	3.88472e-16
g27891.t1|FZD4-RAT	0.282472	0.278	0.143	4.39716e-16
g30095.t1|NUCL1-ORYSJ	-0.252834	0.702	0.825	4.40279e-16
g27981.t1|MGA-HUMAN	0.238141	0.439	0.271	9.0987e-16
g28229.t1|PTGR1-BOVIN	0.258616	0.785	0.721	9.30964e-16
g31352.t1|RECK-MOUSE	-0.218926	0.192	0.329	1.22818e-15
g1275.t1|PROP-HUMAN	0.193333	0.115	0.025	1.46859e-15
g31657.t1|INT3-MOUSE	0.227079	0.311	0.174	1.97839e-15
g14431.t1|AGUA-PSEA7	0.136801	0.11	0.021	2.16133e-15
g25169.t1|RL12-RAT	-0.152524	0.97	0.981	3.34309e-15
g28711.t1|DAB2P-MOUSE	0.263994	0.315	0.177	3.99635e-15
g32536.t1|CSKI2-MOUSE	0.306657	0.28	0.15	4.63596e-15
g12126.t1|RASLC-BOVIN	-0.129837	0.273	0.446	4.77164e-15
g10790.t1|MYLK-SHEEP	0.204527	0.22	0.097	4.80871e-15
g17348.t1|MOM5-CAEEL	-0.134648	0.037	0.11	5.9606e-15
g5995.t1|MKNK1-MOUSE	0.181992	0.13	0.035	6.4361e-15
g29473.t1|RHCG-CHICK	0.434894	0.19	0.079	7.66946e-15
g26902.t1|NOTUM-MOUSE	0.211334	0.101	0.018	8.62522e-15
g1973.t2|KI26A-MOUSE	0.330711	0.269	0.142	9.27334e-15
g16299.t1|ST1B1-MOUSE	0.229892	0.243	0.119	1.74617e-14
g3755.t1|G3ST3-MOUSE	0.142867	0.102	0.019	1.78975e-14
g29487.t1|ABR-BOVIN	0.28119	0.315	0.18	1.82025e-14
g5224.t1|ADRB2-BOVIN	0.154996	0.077	0.005	2.14929e-14
g3410.t1|ODBA-MACFA	0.456719	0.437	0.302	3.15277e-14
g22300.t2|RASLC-DANRE	0.12619	0.072	0.004	3.67761e-14
g29266.t1|ADCY9-MOUSE	-0.304537	0.141	0.244	3.75567e-14
g12567.t1|SOX2-CHICK	0.25858	0.091	0.013	3.83302e-14
g29099.t1|FP-ACRMI	0.225315	0.261	0.134	4.10748e-14
g25120.t1|KLF5-MOUSE	0.256741	0.258	0.136	6.2119e-14
g16569.t1|SNRK-HUMAN	0.229042	0.193	0.082	6.36127e-14
g23188.t1|S6A13-RAT	0.199411	0.154	0.053	6.55835e-14
g12466.t1|LMIP-RAT	0.51645	0.143	0.048	7.24935e-14
g16040.t1|PDE2A-BOVIN	0.164256	0.151	0.051	9.27009e-14
g23100.t1|ASPP-AEDAE	0.294289	0.711	0.585	1.34779e-13
g22804.t1|SUP9-CAEEL	-0.169	0.054	0.133	1.46759e-13
g7863.t1|TAXB1-RAT	0.276628	0.573	0.449	1.48187e-13
g28847.t1|TBA3-RAT	0.229944	0.813	0.725	1.78512e-13
g8333.t1|ANPRA-MOUSE	0.146727	0.084	0.011	1.91076e-13
g6141.t1|Y381-RICFE	-0.099365	0.015	0.066	1.92306e-13
g4038.t1|PRFA-POLPE	0.302503	0.081	0.01	2.62929e-13
g11575.t2|CHDH-MOUSE	-0.140335	0.051	0.128	4.05309e-13
g15390.t1|ORNT1-HUMAN	0.249731	0.273	0.151	5.42638e-13
g26294.t1|PAR12-HUMAN	0.286906	0.391	0.257	7.91806e-13
g4616.t1|MEIS3-HUMAN	-0.13913	0.028	0.089	8.89348e-13
g31954.t1|NKX25-XENLA	-0.0669947	0.001	0.027	1.03472e-12
g25855.t1|PIGL-HUMAN	0.188572	0.196	0.088	1.04436e-12
g16092.t1|RS3A-NEMVE	-0.173557	0.94	0.972	1.26814e-12
g3893.t1|ASPGB-ARATH	-0.543172	0.201	0.304	1.41747e-12
g27219.t1|SMTN-HUMAN	0.244787	0.145	0.052	1.45526e-12
g7938.t1|MOT14-HUMAN	0.433117	0.096	0.021	1.86619e-12
g32345.t1|RB27A-HUMAN	0.202498	0.179	0.076	2.6241e-12
g1844.t1|RL13-DANRE	-0.128417	0.973	0.979	3.15023e-12
g28962.t1|AZRB-BACOY	0.196436	0.908	0.872	3.31693e-12
g20388.t1|ETHE1-ARATH	0.257544	0.331	0.203	3.89578e-12
g6813.t1|ITB2-HUMAN	0.192687	0.852	0.767	4.07471e-12
g5309.t1|MYO7A-HUMAN	0.140418	0.111	0.03	7.10501e-12
g14048.t1|DAPK2-HUMAN	0.185443	0.31	0.175	7.41732e-12
g18011.t1|RAS3-DROME	0.285012	0.345	0.223	8.51862e-12
g10961.t1|GAPR1-MOUSE	-0.0624291	0.003	0.032	1.48745e-11
g5882.t1|SAL-SILAS	-0.562714	0.356	0.447	1.61598e-11
g20349.t1|Y2028-MYCBO	0.282949	0.609	0.492	1.99933e-11
g27863.t1|OX2R-PIG	-0.0721645	0.007	0.043	2.07136e-11
g16432.t1|ATS20-MOUSE	0.155135	0.072	0.009	2.21875e-11
g21120.t2|RB6I2-MOUSE	0.245059	0.438	0.306	2.23734e-11
g13698.t1|OPN4A-GADMO	-0.113125	0.076	0.162	2.33442e-11
g29926.t1|GRN-HUMAN	0.231933	0.672	0.516	2.76844e-11
g13727.t1|B3GN4-MOUSE	0.108667	0.058	0.002	2.86205e-11
g456.t1|HD-MOUSE	-0.182955	0.051	0.121	2.96114e-11
g32297.t1|QPCTL-BOVIN	-0.29219	0.174	0.274	3.01063e-11
g87.t1|GFPT2-RAT	0.602216	0.498	0.43	3.0743e-11
g16698.t1|BRAC-CHICK	0.240223	0.067	0.006	3.26489e-11
g25100.t1|CCNI-MOUSE	0.373315	0.405	0.291	3.68438e-11
g16436.t1|SYQ-BOVIN	0.232392	0.536	0.408	3.90445e-11
g11748.t1|NAS13-CAEEL	-0.244095	0.682	0.73	4.38012e-11
g13212.t1|TLL2-HUMAN	0.362513	0.246	0.14	5.22847e-11
g3553.t1|PHNX-SYNFM	0.769453	0.36	0.261	5.81179e-11
g11573.t1|CHDH-RAT	-0.208248	0.116	0.21	5.86524e-11
g10536.t1|MITF-MOUSE	0.218315	0.366	0.24	8.35997e-11
g6940.t1|ERAP2-BOVIN	0.108112	0.06	0.004	8.70105e-11
g17315.t1|AGUA-LACSS	0.146998	0.097	0.025	9.09337e-11
g3156.t1|UBE2H-MOUSE	0.317082	0.56	0.441	9.31081e-11
g27211.t1|GIT2-HUMAN	0.291284	0.238	0.131	1.27261e-10
g23620.t1|G3ST3-MOUSE	-0.279223	0.081	0.159	1.30713e-10
g18478.t1|DHSD-MOUSE	0.199676	0.792	0.707	1.34123e-10
g14887.t1|LAMP1-RAT	0.212954	0.918	0.877	1.46212e-10
g12999.t1|CALM-METSE	0.152799	0.929	0.88	1.47861e-10
g11301.t1|ASIC1-OPSTA	0.0894238	0.053	0.001	1.66537e-10
g33087.t1|AGRIN-HUMAN	-0.124899	0.019	0.067	1.68165e-10
g2830.t1|WHITE-DROME	0.215816	0.22	0.114	1.81605e-10
g31872.t1|ADA1A-HUMAN	-0.126442	0.033	0.092	1.84363e-10
g14267.t1|GRHL1-MOUSE	0.201431	0.273	0.159	2.00931e-10
g23436.t1|S2611-BOVIN	-0.105629	0.019	0.067	2.0785e-10
g23875.t1|TM11B-MOUSE	0.445871	0.177	0.084	2.3865e-10
g22677.t2|CNTN4-RAT	0.183796	0.272	0.159	2.44262e-10
g33286.t1|ARP19-XENTR	0.266585	0.55	0.434	2.46994e-10
g30409.t1|CASR-RAT	-0.0831664	0.012	0.052	2.50618e-10
g14403.t1|ZCH10-MOUSE	0.560104	0.616	0.523	2.58083e-10
g25356.t1|FBN1-HUMAN	-0.192955	0.078	0.156	5.49846e-10
g5933.t1|PH4H-DROME	0.105404	0.077	0.014	5.78567e-10
g8549.t1|STIM1-BOVIN	0.174204	0.24	0.135	8.67509e-10
g11287.t2|DCX-MOUSE	-0.07784	0.006	0.039	9.83888e-10
g30276.t1|WDR1A-XENLA	0.213988	0.625	0.515	9.85106e-10
g10959.t1|GAPR1-MOUSE	-0.0653036	0.004	0.032	1.00155e-09
g4330.t1|CROCC-MOUSE	0.242489	0.222	0.121	1.02065e-09
g11658.t1|GLC7B-CAEEL	0.214276	0.501	0.386	1.09256e-09
g2192.t1|LMX1A-HUMAN	-0.111371	0.029	0.083	1.1215e-09
g28899.t1|COASY-HUMAN	0.202554	0.4	0.278	1.89947e-09
g14402.t1|S2536-DANRE	0.180721	0.123	0.045	2.2433e-09
g24321.t1|KAD2-DANRE	0.142626	0.85	0.806	2.92429e-09
g17202.t1|TRAF5-MOUSE	0.302048	0.442	0.317	3.24921e-09
g17970.t1|S22AL-MOUSE	0.0793551	0.079	0.017	3.70737e-09
g31632.t1|HES1B-XENLA	0.258607	0.239	0.136	4.95784e-09
g25119.t1|PP2C2-CAEEL	0.122708	0.173	0.081	5.31981e-09
g14733.t1|5HT1R-DROME	0.144251	0.086	0.022	5.35858e-09
g9527.t1|PLSI-BOVIN	0.113801	0.08	0.019	5.86443e-09
g4995.t1|GBRB3-RAT	0.151639	0.115	0.041	6.92594e-09
g21683.t2|CSP1-ARATH	-0.189184	0.789	0.847	7.6246e-09
g10127.t2|FGFR3-PLEWA	-0.092254	0.003	0.028	7.94724e-09
g24866.t1|DYRK2-MOUSE	0.182797	0.429	0.309	8.9884e-09
g4599.t1|DCC-HUMAN	0.171268	0.176	0.086	1.04269e-08
g5619.t1|VATL-RAT	0.13568	0.968	0.971	1.07096e-08
g20867.t1|HMCN1-HUMAN	0.106067	0.078	0.018	1.1828e-08
g10788.t1|KALRN-HUMAN	0.175326	0.208	0.112	1.21259e-08
g30594.t1|PDI2-CAEEL	-0.255867	0.674	0.733	1.31919e-08
g6116.t1|NALP7-HUMAN	0.0706287	0.051	0.004	1.58649e-08
g6628.t1|CLCN3-PONAB	0.175155	0.195	0.102	1.88413e-08
g15493.t1|OFUT2-MOUSE	0.185154	0.299	0.188	1.96773e-08
g10565.t1|ICMT-RAT	0.109345	0.994	0.99	2.01391e-08
g10230.t1|ZAN-HUMAN	0.0847113	0.073	0.015	2.32092e-08
g3222.t1|ARX-RAT	0.218142	0.045	0.001	2.44192e-08
g8913.t1|FGF20-HUMAN	0.455411	0.126	0.052	2.57706e-08
g26029.t1|MMP17-MOUSE	0.345169	0.264	0.167	2.76668e-08
g9515.t1|VA5-VESMG	0.375282	0.048	0.003	2.94444e-08
g32582.t1|SHRM4-MOUSE	-0.286449	0.429	0.518	3.05603e-08
g14919.t1|RS9-RAT	-0.102732	0.978	0.989	3.70777e-08
g22317.t1|RERG-BOVIN	-0.384083	0.203	0.286	3.92893e-08
g6326.t1|SUH-XENLA	0.177841	0.185	0.095	3.984e-08
g26884.t1|MCTP1-HUMAN	-0.268939	0.346	0.44	4.35308e-08
g14576.t1|CKLF7-MOUSE	0.0821162	0.048	0.003	4.72208e-08
g7717.t1|ADT-CHLRE	0.0759449	0.999	0.998	5.04271e-08
g31434.t1|OPSD1-MIZYE	-0.101349	0.054	0.117	5.29696e-08
g1520.t1|ABCA1-HUMAN	0.0817288	0.066	0.012	5.43632e-08
g2102.t1|B3GN7-HUMAN	0.16776	0.326	0.21	5.76854e-08
g22615.t1|FUT5-GORGO	-0.445351	0.351	0.408	6.86776e-08
g13918.t1|NCAM1-BOVIN	0.18916	0.767	0.708	7.15229e-08
g3641.t3|DMD-CHICK	-0.279387	0.158	0.242	7.75399e-08
g18872.t2|RHG07-BOVIN	0.201658	0.456	0.338	8.49038e-08
g27993.t1|ATP5J-RAT	0.156608	0.795	0.729	9.91743e-08
g22718.t1|IPP2-RABIT	0.162966	0.493	0.378	1.17069e-07
g21580.t1|SDHB-CHICK	0.180673	0.685	0.593	1.23403e-07
g33439.t1|PAO-MAIZE	-0.108349	0.007	0.036	1.56731e-07
g24667.t1|FAXC-MOUSE	-0.142724	0.873	0.916	1.68717e-07
g9520.t1|PLST-HUMAN	0.158609	0.309	0.203	1.79576e-07
g22932.t2|SO4C1-MOUSE	0.109019	0.089	0.027	2.35853e-07
g28101.t1|RSLBB-XENTR	-0.159365	0.073	0.14	2.48976e-07
g3773.t1|DD3-DICDI	0.0828526	0.041	0.001	2.5328e-07
g9247.t1|NECX-APLCA	0.105263	0.063	0.012	2.71792e-07
g30305.t1|NPC2-DROME	0.562559	0.383	0.306	2.79479e-07
g12291.t1|HMCN1-HUMAN	0.359005	0.265	0.178	3.37182e-07
g14525.t1|TTC28-HUMAN	0.220219	0.18	0.097	3.65971e-07
g29956.t1|ITB1-SHEEP	0.158919	0.346	0.244	4.49192e-07
g6973.t1|COX5B-HUMAN	0.168247	0.826	0.759	4.71941e-07
g4466.t1|SAP3-MACFA	0.37915	0.304	0.22	4.84445e-07
g6257.t1|OPN4-PHOSU	0.151603	0.068	0.016	4.99372e-07
g7810.t1|KCNA2-ONCMY	0.0844738	0.064	0.013	5.62877e-07
g7129.t1|VIAAT-XENLA	0.131527	0.102	0.038	5.78243e-07
g2608.t1|RASLC-DANRE	0.408932	0.222	0.142	6.22196e-07
g15582.t1|WNT11-XENLA	0.223285	0.057	0.01	8.03781e-07
g7395.t1|SPTB2-MOUSE	0.165303	0.237	0.143	8.08254e-07
g32930.t2|ACT-ASPOR	0.0789728	0.074	0.019	8.23657e-07
g23080.t1|CIP4-DANRE	0.133921	0.345	0.234	9.00836e-07
g20342.t1|G3P2-DANRE	0.133176	0.888	0.822	9.029e-07
g5564.t1|SCE3-SCHPO	-0.211549	0.493	0.572	9.09465e-07
g2671.t1|BODG-RAT	0.133124	0.091	0.031	9.49834e-07
g12475.t1|CGL-MACFA	-0.171128	0.095	0.167	9.69738e-07
g10648.t1|BGAL-PONAB	0.222443	0.11	0.046	1.04636e-06
g32585.t1|CR3L1-MOUSE	-0.348468	0.462	0.521	1.08768e-06
g11952.t1|FADD-DROME	0.147723	0.136	0.065	1.14744e-06
g21559.t1|PFD2-HUMAN	0.189064	0.588	0.481	1.16133e-06
g29124.t1|SH3K1-HUMAN	0.16079	0.582	0.473	1.1653e-06
g17842.t1|CP17A-CHICK	-0.12101	0.044	0.098	1.44794e-06
g11736.t1|NOT2-XENLA	0.0949444	0.048	0.005	1.45769e-06
g24123.t1|NEB1-HUMAN	0.0805517	0.156	0.077	1.54775e-06
g5736.t1|FA49B-MOUSE	0.142655	0.237	0.143	1.60604e-06
g33714.t2|RHG20-HUMAN	0.184186	0.231	0.141	1.65204e-06
g29670.t1|ENPL-BOVIN	-0.177007	0.796	0.862	1.82478e-06
g14428.t1|ACK1-BOVIN	-0.0802374	0.012	0.044	1.82683e-06
g449.t1|TMOD3-MOUSE	0.144186	0.582	0.432	1.85731e-06
g32566.t1|ADDA-PONAB	0.11562	0.113	0.047	2.05626e-06
g27996.t1|RS25-BRABE	-0.0946522	0.987	0.994	2.32828e-06
g29032.t1|NDUB7-DICDI	0.174822	0.551	0.451	2.62269e-06
g8395.t1|RS23-ICTPU	-0.0935608	0.987	0.998	2.78427e-06
g14572.t1|AMT3-CAEEL	-0.107245	0.973	0.988	2.87707e-06
g15382.t1|MFSD6-HUMAN	0.105253	0.037	0.001	3.01177e-06
g17144.t1|ASIC5-MOUSE	0.0684907	0.035	0	3.09636e-06
g14795.t1|TSP4B-DANRE	0.30112	0.119	0.054	3.10779e-06
g23514.t1|CBPD-LOPSP	0.186916	0.447	0.345	3.21793e-06
g13083.t1|INHBB-RAT	-0.151697	0.041	0.091	3.57778e-06
g33590.t1|CAB45-XENLA	0.190474	0.526	0.42	3.5858e-06
g24936.t1|PSD10-DICDI	0.146749	0.157	0.08	3.64007e-06
g24961.t1|S39AD-DANRE	-0.216354	0.36	0.454	3.64267e-06
g3238.t1|TIC32-ARATH	0.128684	0.352	0.243	4.82795e-06
g13674.t1|TM55B-HUMAN	0.166749	0.293	0.197	5.11518e-06
g14550.t1|CTRO-HUMAN	0.172438	0.211	0.127	5.33897e-06
g24374.t1|ACM3-MOUSE	0.118503	0.128	0.059	5.38279e-06
g8590.t1|ANO4-BOVIN	0.117724	0.068	0.019	5.74203e-06
g28606.t1|ATF4-MOUSE	0.288871	0.838	0.783	5.74526e-06
g31380.t1|LMBD1-NEMVE	0.16069	0.316	0.218	7.38642e-06
g10136.t2|RET-MOUSE	-0.0587726	0.005	0.029	7.87207e-06
g18097.t1|SI1L1-MOUSE	0.11279	0.314	0.212	7.9697e-06
g26988.t1|ANPRA-HUMAN	0.190534	0.329	0.234	8.6823e-06
g8550.t1|ASIC3-HUMAN	-0.155706	0.077	0.138	9.41676e-06
g17908.t1|FBN3-HUMAN	0.0714364	0.074	0.022	9.92977e-06
g9184.t2|KAPR2-DROME	-0.0385838	0.005	0.027	9.95608e-06
g33693.t1|LBP-HUMAN	0.188331	0.082	0.028	1.08211e-05
g12024.t1|RL36-IXOSC	-0.0902589	0.985	0.996	1.08608e-05
g7829.t1|PTHB1-XENLA	0.0991916	0.128	0.06	1.38545e-05
g18366.t1|SERIC-NEMVE	0.14248	0.202	0.119	1.43544e-05
g18374.t1|LOX5-MESAU	0.091182	0.069	0.019	1.44235e-05
g27099.t1|ZSC10-HUMAN	0.114163	0.034	0.001	1.54641e-05
g30298.t1|AGRIN-CHICK	-0.357313	0.357	0.424	1.59078e-05
g23268.t1|PKHG5-HUMAN	0.171198	0.299	0.202	1.90818e-05
g30922.t2|ABLM1-HUMAN	0.105272	0.148	0.076	1.98828e-05
g33440.t1|OTX1B-DANRE	0.0530244	0.032	0	1.994e-05
g9166.t1|CAH2-TRIHK	0.108619	0.129	0.062	2.12022e-05
g29654.t1|DLG1-XENTR	0.157848	0.428	0.322	2.25127e-05
g10519.t1|PRIC2-HUMAN	-0.254203	0.448	0.505	2.34307e-05
g2137.t1|NPYR-DROME	-0.103969	0.053	0.105	2.94124e-05
g18842.t1|WLS-MOUSE	0.109993	0.111	0.05	3.06995e-05
g2979.t1|STL1-ARATH	0.147809	0.307	0.213	3.11577e-05
g29969.t1|ACER3-HUMAN	0.0951612	0.152	0.08	3.41723e-05
g21831.t1|RL6-CHILA	-0.110255	0.956	0.969	3.44959e-05
g15133.t1|PRRT1-RAT	0.164011	0.551	0.451	3.53015e-05
g31661.t1|ITK-HUMAN	0.0853731	0.085	0.031	3.54692e-05
g7319.t1|GRM5-HUMAN	0.0571049	0.054	0.012	3.70112e-05
g31939.t1|CPNE1-HUMAN	0.15297	0.316	0.222	3.73677e-05
g33115.t1|1433Z-BOMMO	0.112331	0.879	0.859	4.01034e-05
g11399.t1|FSTL1-BOVIN	0.455409	0.364	0.292	4.09514e-05
g5380.t1|BI1-PAROL	0.131256	0.821	0.779	4.39864e-05
g15242.t1|GALR2-RAT	-0.0891156	0.018	0.051	4.43644e-05
g6635.t1|ZER1-HUMAN	0.0815506	0.069	0.021	4.48342e-05
g15359.t1|ZIC3-HUMAN	0.379257	0.153	0.089	4.56894e-05
g3528.t1|GBLP-HYDVU	-0.126234	0.819	0.875	4.95502e-05
g22585.t1|DUS7-MOUSE	0.210078	0.606	0.531	5.40283e-05
g4585.t1|RAB4B-DANRE	0.135245	0.244	0.157	5.56225e-05
g16834.t1|MDHC-HUMAN	-0.138728	0.826	0.855	5.57904e-05
g7820.t1|FZD5-RAT	0.104493	0.126	0.061	5.84363e-05
g2903.t1|MGT4B-DANRE	0.108219	0.272	0.181	5.84972e-05
g12787.t1|ANX12-HYDVU	0.115976	0.948	0.933	6.23997e-05
g18935.t1|5HT1F-RAT	0.180242	0.061	0.017	7.70858e-05
g7262.t1|CTNB-URECA	0.167388	0.416	0.322	7.84247e-05
g12461.t1|SURF4-DROME	-0.228784	0.48	0.553	8.19303e-05
g28.t1|AP2S1-RAT	0.158425	0.418	0.321	8.34064e-05
g3053.t2|SVIL-HUMAN	0.210589	0.281	0.196	8.67113e-05
g7119.t1|3BP5-HUMAN	0.251641	0.248	0.169	8.81534e-05
g28459.t1|GCY-ARBPU	-0.0560037	0.004	0.025	9.22106e-05
g30893.t1|PPA2-ARATH	0.208287	0.431	0.336	0.00010499
g12046.t1|DPYS-RAT	0.0682512	0.048	0.01	0.000119123
g15457.t1|ATX3-RAT	0.152909	0.198	0.121	0.000122578
g13140.t1|IFT46-DANRE	0.0871426	0.078	0.028	0.000122681
g29921.t2|ZFYV9-HUMAN	0.193482	0.383	0.288	0.000123823
g24862.t1|HEXP-LEIMA	-0.153984	0.801	0.815	0.000126551
g24983.t1|ZBED4-HUMAN	0.18512	0.137	0.073	0.000137771
g22716.t1|RL35A-PONAB	-0.182727	0.779	0.808	0.000137806
g24589.t1|GNAQ-MIZYE	0.180803	0.461	0.368	0.000142381
g10687.t1|ACADM-BOVIN	0.146271	0.483	0.379	0.000143176
g10794.t1|SIM12-MOUSE	0.162039	0.359	0.267	0.000151739
g32361.t2|OAZ2-MOUSE	0.182066	0.365	0.27	0.000170446
g15241.t1|GALR2-HUMAN	-0.193449	0.123	0.189	0.000184091
g31283.t1|SYT11-HUMAN	-0.103948	0.047	0.094	0.000186927
g10077.t1|STAC3-HUMAN	0.121785	0.248	0.164	0.000232404
g22426.t1|LASP1-PONAB	0.153648	0.768	0.687	0.000251597
g1824.t1|NEK7-MOUSE	0.146695	0.215	0.138	0.000267087
g682.t1|OPN4-PHOSU	-0.0660911	0.023	0.058	0.000277239
g5416.t1|LGR5-MOUSE	0.141534	0.039	0.005	0.000277918
g24822.t1|CALR-RABIT	-0.142157	0.992	0.999	0.000311269
g17198.t3|KCC2D-CAEBR	0.167785	0.287	0.202	0.000311925
g23927.t1|S12A2-MOUSE	0.226773	0.378	0.296	0.000324148
g30897.t1|RM49-DROME	-0.162415	0.203	0.28	0.000353143
g31234.t1|PTPRD-HUMAN	0.140402	0.119	0.06	0.000376404
g11780.t1|SP4-MOUSE	-0.117803	0.038	0.08	0.000389827
g22963.t1|HDAC4-CHICK	-0.188114	0.126	0.19	0.000394111
g11471.t1|CALM-PLAFA	0.37037	0.225	0.155	0.000401248
g23847.t1|CYTSA-XENTR	0.144224	0.284	0.198	0.000416122
g12077.t1|UBR4-HUMAN	0.40513	0.34	0.275	0.000427983
g27977.t1|HS12A-HUMAN	-0.304801	0.434	0.482	0.000443448
g8769.t1|PIRL-SOLLC	0.12833	0.297	0.206	0.000462614
g31440.t1|NPYR-DROME	-0.0543301	0.008	0.03	0.000469529
g20640.t1|HTK7-HYDVU	0.0994662	0.227	0.146	0.00052106
g30202.t1|ANK3-MOUSE	0.157433	0.13	0.069	0.000552749
g29450.t1|USPAL-ARATH	0.09561	0.19	0.116	0.000567455
g24934.t1|ANR27-HUMAN	0.101926	0.11	0.053	0.000571466
g8394.t1|FBX8-MOUSE	0.139543	0.175	0.106	0.000580155
g31704.t1|TM175-DANRE	-0.0850517	0.052	0.1	0.000582706
g14507.t1|SEP2B-XENLA	0.166961	0.371	0.283	0.000592703
g10912.t1|BCAT-NEMVE	-0.123297	0.052	0.098	0.000607306
g4335.t1|CATL-DROME	0.276198	0.565	0.492	0.000665691
g10483.t1|OPN4-PHOSU	0.144904	0.055	0.016	0.000670447
g22314.t1|NPAL2-HUMAN	0.0773447	0.142	0.078	0.000709769
g12840.t1|RHCG-ONCMY	0.078044	0.051	0.013	0.000733446
g5971.t1|RERGL-BOVIN	-0.0404259	0.005	0.024	0.000744037
g24237.t1|CATB-RAT	0.17564	0.878	0.787	0.000872402
g3804.t1|YUGO-BACSU	0.0953647	0.062	0.02	0.000899138
g19264.t1|MNB-DROME	0.135178	0.225	0.148	0.000942895
g32814.t1|NPHP3-HUMAN	0.0359072	0.03	0.002	0.000949966
g240.t1|THTM-HUMAN	0.0865983	0.248	0.167	0.000954598
g15743.t1|RL40-BRARP	-0.0753523	0.049	0.096	0.000969216
g25677.t1|AGRL3-RAT	-0.0316109	0.019	0.05	0.00100229
g30448.t1|LRP1B-HUMAN	-0.0728936	0.043	0.087	0.0010066
g28957.t1|CHI1-THECC	0.245701	0.203	0.137	0.0010317
g11070.t1|SPD2A-HUMAN	0.0988328	0.151	0.087	0.00108183
g4938.t1|DIAP2-HUMAN	0.165838	0.312	0.229	0.0011533
g14018.t1|POSTN-HUMAN	-0.0578587	0.023	0.056	0.00122931
g8057.t1|5HT2B-HUMAN	0.106092	0.029	0.002	0.0013396
g1532.t1|ABCA2-HUMAN	0.0371844	0.034	0.004	0.00141325
g5621.t1|PITX1-XENLA	0.059734	0.031	0.003	0.0014955
g28744.t1|BMP2K-HUMAN	0.10911	0.218	0.142	0.00170633
g22859.t1|TUT4-MOUSE	0.130767	0.276	0.193	0.00173963
g15632.t1|VP302-LYCMC	0.216898	0.146	0.087	0.00175137
g19502.t1|SNX17-DANRE	0.123502	0.315	0.231	0.00192136
g25524.t1|RWA3-ARATH	0.0827365	0.125	0.066	0.00195981
g5525.t1|ERG-HUMAN	0.0493017	0.028	0.002	0.00211715
g8784.t1|MOT10-DANRE	0.147532	0.106	0.054	0.00217032
g33771.t1|GRM3-PONAB	0.066098	0.028	0.002	0.00248639
g16168.t1|GRP78-CHICK	-0.219322	0.83	0.879	0.00252925
g10239.t1|LTBP1-MOUSE	0.0591856	0.05	0.014	0.00265602
g14794.t1|ACHA3-CHICK	0.0976702	0.243	0.162	0.00272581
g4606.t1|PJVK-HUMAN	0.112494	0.292	0.209	0.00273197
g14801.t1|ZBED4-MOUSE	-0.131447	0.051	0.096	0.00283677
g18365.t1|PABP1-MOUSE	-0.128933	0.922	0.919	0.00285473
g312.t1|RL13A-MACFA	-0.0912001	0.976	0.991	0.00308919
g15938.t2|VPP1-MOUSE	0.114544	0.438	0.35	0.00343484
g24094.t1|WNT1-DANRE	0.150022	0.024	0	0.00346042
g26466.t1|PPBT-CHICK	0.211548	0.124	0.071	0.00349389
g30707.t1|ANXA7-BOVIN	0.122377	0.835	0.777	0.00385246
g7977.t1|MMP24-MOUSE	0.545326	0.448	0.403	0.00386734
g7609.t1|CATL-DROME	0.349615	0.413	0.352	0.00408617
g21579.t1|TRPV3-HUMAN	0.132121	0.241	0.162	0.00415373
g13197.t1|V245-FOWPN	0.0666943	0.025	0.001	0.00419098
g21274.t1|MYPT2-MOUSE	0.145242	0.474	0.388	0.00445224
g6824.t1|EF1B-XENLA	-0.147064	0.782	0.82	0.00483779
g27164.t1|FLNA-HUMAN	0.160032	0.292	0.213	0.00498642
g18436.t1|RENR-RAT	0.123307	0.395	0.308	0.00500091
g29030.t1|MTPN-RAT	0.210528	0.304	0.228	0.00505966
g21613.t1|CHMP5-RAT	0.12184	0.373	0.288	0.00555172
g9811.t1|HMCN2-MOUSE	0.104723	0.212	0.141	0.00568455
g28647.t1|ARMC4-HUMAN	0.0429297	0.028	0.003	0.0062246
g19857.t1|ATP5L-MOUSE	0.111563	0.827	0.775	0.00672207
g20712.t1|GGP2-ARATH	0.147661	0.161	0.099	0.00755079
g23719.t1|2A5A-MOUSE	0.119764	0.656	0.572	0.00779014
g18917.t2|PTPRO-HUMAN	0.0509509	0.066	0.026	0.00780004
g12217.t1|CDC37-DROME	0.185834	0.493	0.408	0.00829611
g16426.t1|GRAM4-XENLA	0.0801379	0.246	0.172	0.00836458
g12043.t2|ARF6-CHICK	0.118163	0.238	0.167	0.00849589
g13590.t1|GRLQ-DICDI	-0.0609314	0.031	0.066	0.00871467
g31922.t1|INX4-DROME	-0.0669295	0.955	0.966	0.00890723
g26784.t1|VMPA3-LOXIN	-0.115513	0.03	0.064	0.00906109
g14337.t1|RM37-HUMAN	0.0807165	0.166	0.102	0.00919948
g7533.t1|LGMN-MACFA	0.327573	0.318	0.256	0.00929893
g12601.t1|UROM-RAT	0.110352	0.37	0.283	0.00931195
g17805.t1|PACRG-MOUSE	0.0374089	0.028	0.003	0.00968447
g6732.t1|SECG-DICDI	0.0409907	0.022	0	0.00969138
g10517.t1|NAS15-CAEEL	0.445906	0.252	0.194	0.00998832
g7051.t1|GOLP3-RAT	0.145766	0.528	0.452	0.0100256
g12048.t1|RS11-RAT	-0.0719625	0.986	0.99	0.0105437
g31877.t1|ASI4A-DANRE	-0.0312902	0.007	0.027	0.0111964
g12710.t1|RAB12-MOUSE	0.122974	0.641	0.538	0.0112464
g26676.t1|AQP9-HUMAN	0.0739056	0.024	0.001	0.0114163
g29234.t2|SH3R1-XENLA	0.116801	0.227	0.153	0.0117557
g10498.t1|TRFR-CHICK	-0.0681042	0.013	0.036	0.0119655
g10580.t1|YAP1-ORYLA	0.124744	0.136	0.08	0.0126004
g31742.t1|RT15-DANRE	0.159347	0.25	0.18	0.012637
g33729.t1|HEM3-DESRM	-0.183001	0.108	0.159	0.0135094
g5702.t1|TMEM9-MOUSE	0.160946	0.605	0.552	0.0136061
g31268.t1|5NTD-MOUSE	0.235174	0.225	0.164	0.0141201
g26107.t1|SYT15-HUMAN	-0.071867	0.075	0.125	0.01453
g2140.t1|EGR1-XENTR	0.101716	0.941	0.92	0.0151384
g24743.t1|AKR1-KLULA	0.0768484	0.105	0.055	0.0154081
g11546.t1|ADAM9-MOUSE	0.0303378	0.025	0.002	0.0158811
g4334.t1|CATL-DROME	0.244541	0.488	0.412	0.0170489
g24945.t1|COG2-MOUSE	0.0966014	0.4	0.316	0.0182483
g25412.t2|NOTC1-DANRE	0.149787	0.474	0.388	0.0200073
g14971.t1|CL065-DANRE	0.132195	0.382	0.306	0.0207012
g7196.t1|NDK-CHICK	-0.0859643	0.966	0.979	0.0211861
g24313.t1|GRM3-MOUSE	0.0323114	0.02	0	0.0220929
g20853.t1|WNT2B-CHICK	0.0312214	0.02	0	0.0220929
g32191.t1|S40A1-MOUSE	-0.037846	0.004	0.019	0.0228974
g24772.t1|S30BP-HUMAN	0.109446	0.392	0.306	0.0231959
g12681.t1|HAL3B-ARATH	0.0514126	0.091	0.045	0.0244331
g27338.t1|GLNA-PANAR	-0.141844	0.84	0.843	0.0255455
g18250.t1|ASNS-CHICK	-0.15332	0.333	0.411	0.0259306
g19675.t1|AOSL-PLEHO	-0.145021	0.041	0.077	0.0260168
g31029.t1|CCDCX-ANOGA	0.226202	0.535	0.456	0.0265399
g1718.t1|CHSTB-RAT	0.219396	0.436	0.355	0.0278164
g29976.t1|SPIR2-HUMAN	-0.315084	0.407	0.446	0.028037
g18951.t1|LICH-HUMAN	0.237563	0.258	0.192	0.0287842
g22105.t1|SEPT9-HUMAN	0.135721	0.573	0.49	0.0289695
g3105.t1|MTR1A-MOUSE	-0.0480531	0.005	0.022	0.0297235
g32362.t1|M3K9-MOUSE	0.0734655	0.165	0.105	0.030265
g24445.t1|MICA1-DANRE	-0.22921	0.136	0.187	0.0311642
g3409.t1|DIRA-CAEEL	-0.3981	0.264	0.31	0.0327784
g15911.t1|MIC27-BOVIN	0.0849273	0.267	0.194	0.0333253
g11511.t1|GTR3-CHICK	-0.0922774	0.049	0.089	0.0347152
g21354.t1|A2MG-PONAB	-0.0530788	0.194	0.268	0.0356417
g20417.t1|IST1-PONAB	0.118138	0.463	0.384	0.0358388
g27341.t1|STK25-MOUSE	0.0705231	0.275	0.201	0.0363178
g28133.t1|C1GLT-DROME	0.0744804	0.228	0.159	0.0379527
g26797.t1|OXIR-STRAT	-0.0926412	0.089	0.138	0.0380141
g31869.t1|AA2BR-CHICK	-0.0191796	0.002	0.013	0.0391858
g3921.t1|FLNA-MOUSE	0.131236	0.759	0.69	0.0404132
g21036.t1|FA65C-MOUSE	0.0338375	0.019	0	0.0409971
g16204.t1|HMCN1-MOUSE	-0.248408	0.388	0.433	0.0412892
g4304.t1|ACVR1-HUMAN	0.0934092	0.147	0.091	0.0422651
g26445.t1|RL19-DROME	-0.0589642	0.993	0.997	0.045786
g3419.t1|GNA1-DROME	-0.151517	0.114	0.164	0.0526502
g27008.t1|ASAH1-MOUSE	-0.051254	0.016	0.04	0.0543468
g14540.t1|PGDH-CAVPO	0.136191	0.418	0.342	0.0547351
g27170.t1|GMPPB-XENTR	0.0789158	0.3	0.22	0.0551695
g16196.t1|MAB21-AEDAE	0.0456912	0.028	0.004	0.0577336
g24867.t1|UBE2N-PONAB	0.0843847	0.654	0.572	0.0580086
g31094.t2|N42L1-MOUSE	0.115051	0.221	0.156	0.0585292
g21574.t1|V218-FOWPN	0.0926373	0.15	0.093	0.0611004
g20636.t1|NDUS7-BOVIN	0.123753	0.499	0.421	0.0663827
g3134.t1|SSDH-RAT	0.058961	0.06	0.025	0.0666861
g14954.t1|KC1D-XENLA	0.0930575	0.359	0.281	0.0700232
g21088.t1|AT2B3-HUMAN	0.0203325	0.245	0.173	0.0720513
g2932.t1|ASI4B-DANRE	0.0477923	0.041	0.012	0.0723442
g12447.t1|ELK1-RAT	-0.206787	0.343	0.403	0.0731698
g32511.t1|S39A3-RAT	0.100773	0.225	0.16	0.0759125
g7494.t1|RADI-BOVIN	-0.0916995	0.934	0.924	0.0773788
g20083.t1|CP17A-RANDY	-0.0400152	0.001	0.01	0.0782692
g1379.t1|CALB1-CHICK	0.115059	0.113	0.066	0.0789168
g23412.t1|SYTC-BOVIN	0.12021	0.44	0.368	0.0799194
g7975.t1|S35D2-BOVIN	0.0484767	0.055	0.021	0.0801358
g886.t1|ETS3-DROME	-0.0943235	0.009	0.028	0.0804054
g16649.t1|OCTL-DROME	-0.0492656	0.012	0.034	0.0811906
g7626.t1|CALM-MACPY	0.132287	0.11	0.064	0.0838888
g26405.t1|RTJK-DROME	0.0629893	0.072	0.034	0.087742
g29618.t1|ATPB-HUMAN	0.109915	0.821	0.814	0.0903091
g12996.t1|FA46A-HUMAN	0.119666	0.361	0.284	0.0929267
g31063.t1|GMPR2-HUMAN	0.0908225	0.399	0.319	0.093072
g15451.t1|FSHR-HORSE	-0.0378777	0.016	0.04	0.095121
g24294.t1|TEST-MOUSE	-0.0745202	0.248	0.328	0.0954942
g12232.t1|GCYA2-HUMAN	0.140802	0.135	0.085	0.0975548
g594.t1|MMSA-ARATH	0.121953	0.311	0.237	0.0985357
g31213.t1|EAA2-RAT	0.33948	0.211	0.161	0.103969
g3103.t1|DCE2-PIG	0.376278	0.1	0.058	0.107374
g17406.t3|RFX3-XENTR	-0.298423	0.222	0.266	0.107965
g948.t1|SC24C-HUMAN	-0.265011	0.327	0.376	0.109335
g10298.t1|B4GN4-HUMAN	0.0293228	0.024	0.003	0.110381
g20071.t1|CAH5-CAEEL	0.0274809	0.02	0.001	0.11241
g21201.t1|CSDC2-RAT	0.122366	0.573	0.481	0.11256
g5727.t1|KT5AA-DANRE	0.0881251	0.311	0.239	0.113462
g20416.t1|GFI1B-CHICK	0.0420664	0.102	0.056	0.114935
g8603.t1|PKHG7-HUMAN	-0.0590611	0.133	0.193	0.121363
g5541.t1|SORL-CHICK	0.110343	0.346	0.274	0.137136
g1624.t1|PTC1-MOUSE	0.222024	0.12	0.075	0.15018
g2385.t1|RPGP2-HUMAN	-0.184189	0.263	0.321	0.150439
g24768.t1|HMCN1-MOUSE	-0.119188	0.048	0.083	0.162493
g23343.t1|GCY-ARBPU	0.0426342	0.035	0.01	0.162588
g18398.t1|CP4AL-PIG	0.11491	0.172	0.116	0.164734
g6292.t1|FKB2B-RHIO9	-0.168565	0.121	0.169	0.16635
g14799.t1|ACOT1-HUMAN	-0.0287684	0.006	0.021	0.168522
g30702.t1|NDUS5-MACFA	0.109553	0.535	0.453	0.169187
g6847.t1|ARLY-RAT	0.0766194	0.181	0.121	0.170193
g25532.t1|RECK-HUMAN	-0.0526146	0.037	0.069	0.171114
g2922.t1|YHBS-ECOLI	0.108679	0.281	0.206	0.171374
g9167.t1|CAH2-TRIHK	0.115505	0.082	0.043	0.173264
g9100.t1|ACLY-MOUSE	-0.110469	0.062	0.101	0.17637
g19118.t2|LRMP-DANRE	0.0485284	0.034	0.009	0.177496
g10380.t1|CDN1C-MOUSE	0.122387	0.421	0.347	0.197486
g4035.t1|ARD1-UROFA	0.0801228	0.217	0.153	0.220954
g24972.t1|DCL1-COCIM	0.0812404	0.12	0.074	0.221815
g32341.t1|ENAH-HUMAN	0.109696	0.322	0.252	0.222795
g20401.t1|PCS3-LOTJA	0.130314	0.333	0.267	0.223335
g26768.t1|HDAC8-RAT	0.102793	0.087	0.048	0.224281
g8528.t1|HS902-HUMAN	0.111174	0.867	0.824	0.242425
g2575.t1|NR1AA-DANRE	0.0680862	0.264	0.195	0.248848
g18200.t1|RIT2-HUMAN	-0.170932	0.413	0.464	0.248982
g29410.t1|ADRB2-MESAU	0.0555532	0.029	0.006	0.254079
g25657.t1|SEM1A-SCHAM	0.0909478	0.109	0.065	0.256036
g30605.t1|CHST3-CHICK	0.031633	0.032	0.008	0.257394
g30412.t1|CASR-RAT	-0.0501739	0.024	0.05	0.262033
g2923.t1|S2540-DANRE	0.0951617	0.362	0.287	0.275646
g32449.t1|RANB9-DANRE	0.0543117	0.134	0.084	0.282857
g26767.t1|GPX5-PIG	0.161806	0.328	0.258	0.291498
g30708.t1|PP2AB-BOVIN	0.106015	0.617	0.545	0.31046
g9912.t1|TBL2-MOUSE	-0.186689	0.572	0.598	0.32154
g6880.t1|DLL1-XENLA	-0.291508	0.293	0.332	0.322715
g23694.t1|FRMD5-MOUSE	0.0245186	0.016	0	0.322909
g1028.t1|PITC1-XENTR	0.0940425	0.131	0.082	0.324373
g5534.t1|TCMO-STRGA	0.0556567	0.057	0.025	0.33164
g6228.t1|NAS6-CAEEL	0.227374	0.057	0.025	0.337703
g18852.t1|SHOC2-NEMVE	0.0947991	0.213	0.154	0.340077
g9063.t1|FLVC2-HUMAN	-0.0811457	0.081	0.124	0.346147
g22798.t1|TU92-POLAB	-0.371213	0.356	0.381	0.346162
g20653.t1|ZC4H2-MOUSE	0.0323252	0.027	0.005	0.35147
g3129.t1|TM192-DANRE	0.0751435	0.229	0.166	0.357178
g7574.t1|AGRG2-RAT	-0.0130322	0.001	0.01	0.371813
g31823.t1|GRDP1-ARATH	0.0930057	0.179	0.124	0.37867
g16560.t2|G6PI-BOVIN	0.110114	0.658	0.605	0.390107
g4608.t1|ABCBA-HUMAN	0.079498	0.469	0.389	0.392621
g30407.t1|COX15-BOVIN	0.0763212	0.719	0.624	0.399264
g17042.t1|AGRG4-HUMAN	0.0303466	0.019	0.002	0.426431
g17136.t1|KCNQ4-HUMAN	0.0524987	0.021	0.003	0.430199
g20906.t1|SH319-HUMAN	0.1117	0.286	0.22	0.446914
g9543.t1|MPDZ-RAT	0.0891581	0.082	0.044	0.455571
g4001.t1|RL37A-CRYST	-0.0913294	0.957	0.958	0.470194
g8146.t1|TEP1-HUMAN	0.0533765	0.235	0.169	0.485356
g18936.t1|BTBDA-MOUSE	0.0638728	0.154	0.102	0.488506
g15698.t1|CCD47-PONAB	0.114504	0.534	0.464	0.50454
g7710.t1|SGMC-DICDI	0.0585334	0.101	0.058	0.518612
g33.t2|M4K5-MOUSE	0.0372884	0.071	0.035	0.520666
g17619.t1|ZIFL1-ARATH	0.0730956	0.03	0.008	0.524421
g13730.t1|NCAH-DROME	0.0642575	0.142	0.091	0.526322
g5090.t1|VWDE-MOUSE	-0.0264307	0.005	0.019	0.543273
g19496.t1|CRIP1-RAT	-0.376124	0.505	0.509	0.5522
g33500.t1|PRY1-YEAST	0.0365231	0.017	0.001	0.586332
g6294.t1|DNMBP-HUMAN	0.0747674	0.183	0.129	0.611298
g25991.t1|LSM4-MOUSE	0.0786074	0.15	0.1	0.619434
g22959.t1|PNTD-STRAE	0.0449676	0.034	0.011	0.623478
g12722.t1|MP2K6-MOUSE	0.092467	0.219	0.161	0.628666
g25283.t1|GRM1C-PONAB	0.049449	0.069	0.035	0.671753
g20504.t1|LIN41-CHICK	0.0722282	0.211	0.153	0.694167
g4036.t1|SER2-CAEEL	0.0625138	0.045	0.018	0.698287
g26386.t1|SERC-DROME	-0.172032	0.166	0.212	0.712564
g21883.t1|GRP75-BOVIN	-0.114112	0.493	0.554	0.732082
g29819.t1|UB2E3-MOUSE	0.0275451	0.077	0.041	0.739868
g28161.t1|BOK-CHICK	0.0999682	0.053	0.024	0.74206
g15906.t1|ETFA-HUMAN	0.0714247	0.223	0.164	0.742109
g9425.t2|KCNC1-HUMAN	0.0370119	0.018	0.002	0.784588
g24628.t1|M3K4-HUMAN	0.104769	0.391	0.324	0.809157
g15173.t1|NGB-DISMA	-0.0319971	0.003	0.014	0.832724
g20364.t1|PPR27-MOUSE	0.178709	0.092	0.055	0.889226
g26886.t1|RPGR-MOUSE	0.188436	0.9	0.883	0.906924
g10540.t1|RS3-PIG	-0.0953786	0.912	0.921	0.930783
g24138.t1|QRFPR-HUMAN	0.0278603	0.018	0.002	0.97369
g18334.t1|WDR35-RAT	0.0474571	0.05	0.022	0.998186
g23134.t1|S2551-RAT	0.0302988	0.052	0.023	1
g24338.t1|B3GLT-HUMAN	0.0377228	0.054	0.025	1
g10818.t1|PK1L2-MOUSE	0.0365797	0.028	0.007	1
g27787.t1|GSH0-RAT	-0.138943	0.817	0.832	1
g5726.t1|ROCK2-HUMAN	0.0871286	0.33	0.261	1
g10622.t1|B4GN4-MOUSE	0.062997	0.088	0.05	1
g266.t3|VIP2-XENLA	0.0733982	0.122	0.078	1
g949.t1|PKD2-BOVIN	0.158722	0.32	0.263	1
g10041.t1|CYFP1-DANRE	0.0336052	0.034	0.012	1
g19306.t1|ETV6-MOUSE	-0.023123	0.001	0.009	1
g22555.t1|LAMB1-HUMAN	0.267876	0.323	0.273	1
g20989.t1|SCRY4-ENTDO	-0.520862	0.516	0.477	1
g8541.t1|RAE2-MOUSE	0.10804	0.204	0.151	1
g5519.t1|MRP1-CHICK	0.179871	0.166	0.121	1
g24141.t1|CASP3-MOUSE	0.0896972	0.12	0.078	1
g1627.t1|CFDP1-MUNRE	0.0847416	0.313	0.252	1
g14668.t1|DCT2B-XENLA	0.0578667	0.126	0.082	1
g25127.t1|DMTA2-MONAL	-0.0923103	0.04	0.069	1
g10296.t1|TIMP3-SCYTO	0.00926616	0.031	0.01	1
g16544.t1|CSN6-BOVIN	0.0465094	0.317	0.25	1
g3999.t1|DHX33-MOUSE	0.0956046	0.445	0.378	1
g31146.t1|RHG39-HUMAN	0.0583031	0.08	0.045	1
g842.t2|GPT11-XENTR	0.0880517	0.166	0.117	1
g25101.t1|CSN7B-BOVIN	0.0543539	0.14	0.094	1
g30935.t1|R3GEF-MOUSE	0.0882287	0.119	0.077	1
g21989.t1|EIF3L-NEMVE	-0.109198	0.632	0.679	1
g11395.t1|GPC6-MOUSE	-0.185644	0.595	0.627	1
g17283.t1|RNPS1-PONAB	-0.132728	0.485	0.53	1
g31592.t2|NRX3A-HUMAN	0.0280564	0.154	0.103	1
g7216.t1|RHG23-HUMAN	-0.122411	0.232	0.287	1
g1467.t1|MSH6-CHICK	0.0340477	0.031	0.01	1
g31848.t5|ZIFL1-ARATH	0.0426123	0.034	0.012	1
g16211.t1|RL18A-DANRE	-0.101999	0.927	0.93	1
g19687.t1|ATG9A-PONAB	0.0823523	0.124	0.081	1
g4299.t1|MALT1-HUMAN	0.0603917	0.136	0.09	1
g28828.t1	-0.131064	0.192	0.241	1
g20700.t1|ARRD3-MOUSE	0.0481845	0.175	0.123	1
g26951.t1|EXOS2-BOVIN	0.0576861	0.136	0.09	1
g23569.t1|UB2G1-MACFA	0.0739202	0.213	0.158	1
g28283.t1|EIF3I-NEMVE	-0.115713	0.525	0.578	1
g31976.t1|DDC-CAVPO	-0.000770198	0.06	0.097	1
g11799.t2|KCNG2-CHICK	0.0233914	0.013	0	1
g31875.t1|APC4-MOUSE	0.0492849	0.039	0.015	1
g27295.t1|NCAH-DROME	0.0398572	0.033	0.012	1
g33059.t1|AVR2A-BOVIN	0.135369	0.416	0.356	1
g11095.t1|GSH1-MOUSE	0.0370561	0.032	0.011	1
g30334.t1|MUC5A-HUMAN	0.030759	0.032	0.011	1
g8942.t1|RHBT1-HUMAN	0.0434374	0.16	0.111	1
g23284.t1|CACB2-RABIT	0.191316	0.389	0.332	1
g25134.t1|VLDLR-HUMAN	-0.0420301	0.024	0.047	1
g32278.t1|NOVA1-MACFA	0.102087	0.573	0.507	1
g28474.t1|APM1-ARATH	-0.0401358	0.031	0.057	1
g21084.t1|MUC6-HUMAN	0.1054	0.38	0.31	1
g225.t1|KCNAW-DROME	0.0236741	0.013	0	1
g30834.t1|KS6A5-HUMAN	0.0570819	0.075	0.043	1
g10299.t1|TIMP3-HORSE	0.00976148	0.029	0.009	1
g30122.t1|RNF8-MOUSE	0.0985356	0.705	0.647	1
g22571.t1|NAPEP-BOVIN	0.112523	0.928	0.938	1
g5926.t1|ZFP26-MOUSE	0.0776937	0.237	0.181	1
g21408.t1|LCAP-MOUSE	0.0564413	0.098	0.06	1
g3262.t1|PRRT1-RAT	-0.0697574	0.132	0.181	1
g21076.t2|KIBRA-XENTR	0.0843889	0.165	0.117	1
g11274.t1|LRC59-HUMAN	0.11668	0.33	0.271	1
g21751.t1|BOKB-DANRE	0.0672038	0.042	0.018	1
g23894.t1|ZNHI1-HUMAN	0.115747	0.257	0.201	1
g2112.t1|ICEF1-RAT	0.242995	0.357	0.303	1
g4669.t1|RBMX-DANRE	0.0903657	0.551	0.482	1
g3448.t1|SPRTN-XENTR	0.0852621	0.163	0.116	1
g26798.t1|OXIR-STRLI	-0.0259923	0.01	0.025	1
g31447.t1|LRC26-MOUSE	0.0444666	0.101	0.063	1
g25771.t1|ANTA-HYDVU	0.108113	0.035	0.013	1
g33466.t1|CFA70-MACFA	-0.0519871	0.027	0.05	1
g17880.t1|SPY2-MACFA	-0.0497672	0.493	0.562	1
g16372.t1|EMAL6-HUMAN	0.0129468	0.056	0.027	1
g8351.t1|MMAD-RAT	0.0788325	0.681	0.619	1
g8521.t1|H90A1-DANRE	0.0839648	0.95	0.933	1
g1215.t1|KMT2E-HUMAN	0.0117208	0.188	0.135	1
g25730.t1|MVP-STRPU	0.0498249	0.18	0.129	1
g20351.t1|Y1101-SYNY3	0.108355	0.128	0.089	1
g24337.t1|KBP-CHICK	0.0632039	0.2	0.148	1
g24997.t1|CNNM2-RAT	0.199644	0.177	0.13	1
g23153.t1|JNK-DROME	0.0684619	0.138	0.095	1
g28009.t1|UBS3A-DROME	0.0400282	0.248	0.188	1
g30896.t1|KC1A-XENLA	0.0817654	0.69	0.639	1
g31242.t1|NADA-APLCA	0.159163	0.148	0.106	1
g26777.t1|CN159-MOUSE	0.0165985	0.014	0.001	1
g11703.t1|RWDD4-HUMAN	-0.171125	0.345	0.389	1
g21104.t1|PP16A-MOUSE	-0.0396731	0.009	0.024	1
g25033.t1|PGDH-BOVIN	-0.041449	0.034	0.059	1
g15148.t1|OST48-PONAB	-0.162669	0.58	0.603	1
g13962.t1|GRASP-MOUSE	0.0935499	0.073	0.042	1
g25415.t1|CCKAR-CAVPO	0.0267909	0.022	0.005	1
g698.t1|ARGLA-DANRE	0.0928272	0.389	0.322	1
g19818.t1|PGDH-HUMAN	-0.102567	0.126	0.171	1
g11473.t1|MYPT1-MOUSE	-0.0699711	0.073	0.108	1
g17851.t1|EIF3A-NEMVE	-0.106257	0.661	0.692	1
g12098.t1|ADAM8-MOUSE	-0.0132241	0.006	0.019	1
g17641.t1|ANK1-HUMAN	0.0558754	0.095	0.059	1
g7498.t2|SCML2-HUMAN	0.0488398	0.151	0.105	1
g19154.t1|PROM1-HUMAN	-0.12083	0.126	0.167	1
g15129.t1|NLTP-MOUSE	0.0698311	0.185	0.135	1
g29260.t1|CRML-MOUSE	0.0535704	0.138	0.095	1
g28938.t1|KCMA1-PIG	0.0194245	0.012	0	1
g16071.t1|ALA7-ARATH	0.068956	0.302	0.243	1
g18017.t1|FUT5-HUMAN	0.0516563	0.165	0.118	1
g15108.t1|SAX-LITCT	0.0231404	0.015	0.002	1
g8268.t1|LIAS-BOVIN	0.0319658	0.124	0.082	1
g33256.t2|ANO1-MOUSE	0.010236	0.015	0.002	1
g19870.t1|CALM-SOLLC	0.032326	0.017	0.003	1
g7503.t2|HXK2-DROME	0.0719828	0.34	0.275	1
g9138.t1|BAT1-MOUSE	0.0266431	0.046	0.021	1
g15171.t1|NGB1-ONCMY	-0.0174455	0.005	0.016	1
g23549.t1|ATX2-HUMAN	0.0618146	0.207	0.156	1
g25398.t1|VATD-SUBDO	0.0918322	0.436	0.371	1
g1655.t1|NXNL2-MOUSE	0.0221592	0.013	0.001	1
g10209.t1|OPN4A-GADMO	0.0392974	0.018	0.004	1
g18395.t1|CP4C1-BLADI	0.0598057	0.08	0.049	1
g15737.t1|HS3S1-HUMAN	0.0710611	0.16	0.115	1
g11569.t1|FAT4-MOUSE	0.0225816	0.015	0.002	1
g4818.t1|TM135-HUMAN	0.0261211	0.061	0.033	1
g19918.t1|RL32-RAT	-0.0487607	0.983	0.981	1
g1450.t1|JUN-CHICK	-0.108714	0.863	0.862	1
g22183.t1|NAGA-DANRE	0.0358508	0.048	0.023	1
g26917.t1|AHNK-HUMAN	0.0391345	0.068	0.038	1
g18969.t1|ICK-HUMAN	0.0568934	0.28	0.222	1
g15629.t1|TNR16-CHICK	0.0931493	0.422	0.364	1
g17588.t1|RIT1-MOUSE	-0.0762814	0.143	0.19	1
g32495.t1|ADRB2-MACMU	0.0182765	0.013	0.001	1
g26287.t1|2A5D-RABIT	0.0716908	0.385	0.317	1
g1872.t1|NRX1A-HUMAN	-0.0363561	0.014	0.031	1
g30198.t1|FEN1-AEDAE	0.0351735	0.055	0.028	1
g19170.t2|HNRPL-HUMAN	0.0494555	0.113	0.075	1
g10084.t3|MARK3-HUMAN	0.0454059	0.049	0.025	1
g23730.t1|TMEDA-RABIT	-0.203444	0.347	0.385	1
g28516.t1|BAR3-CHITE	-0.10825	0.154	0.196	1
g18292.t1|RT33-MOUSE	0.106009	0.252	0.201	1
g4618.t1|ZNF84-HUMAN	0.0258522	0.044	0.02	1
g23252.t1|CRCM-HUMAN	0.0527263	0.133	0.093	1
g23140.t1|ODO1-HUMAN	0.0893464	0.206	0.159	1
g30425.t1|HIF1A-CHICK	0.137829	0.528	0.471	1
g21417.t1|RBG3-ARATH	0.0673008	0.263	0.209	1
g269.t1|TTC9C-MACFA	0.046432	0.14	0.098	1
g11950.t1|SIK2-MOUSE	0.0556975	0.248	0.196	1
g30478.t1|SMAD4-PIG	0.0310624	0.03	0.012	1
g19034.t1|MIRO1-DANRE	0.0306599	0.065	0.037	1
g5403.t1|B4GN4-HUMAN	0.0097251	0.4	0.327	1
g24841.t1|ANK1-MOUSE	-0.0240863	0	0.005	1
g4301.t1|NDF1-XENLA	-0.0526603	0.004	0.013	1
g29128.t1|NB5R4-DANRE	0.0457235	0.087	0.055	1
g27456.t1|RAP1-CAEEL	-0.130655	0.805	0.827	1
g23071.t1|PI4KB-XENTR	-0.149433	0.161	0.2	1
g3774.t1|DD3-DICDI	0.0212636	0.01	0	1
g18824.t1|RAP1-CAEEL	0.0396848	0.106	0.07	1
g18938.t1|DNA2-BOVIN	-0.0831299	0.317	0.369	1
g6399.t1|LAR1B-HUMAN	-0.120426	0.351	0.399	1
g463.t1|FABG-THEMA	0.03857	0.323	0.262	1
g6417.t1|NALD2-MOUSE	0.0276999	0.098	0.063	1
g26213.t1|SUPT3-HUMAN	0.0703521	0.143	0.102	1
g1457.t1|RN19A-HUMAN	0.0992731	0.403	0.353	1
g1519.t1|KTNA1-STRPU	0.0563595	0.199	0.152	1
g17365.t1|ELMD3-BOVIN	0.0543486	0.087	0.055	1
g27364.t1|PANG1-DROME	0.130542	0.356	0.302	1
g33646.t1|MYO1E-MOUSE	0.0891051	0.716	0.658	1
g25259.t1|ORCT-DROME	0.067116	0.069	0.041	1
g10255.t1|GABR2-MOUSE	-0.0278504	0.006	0.017	1
g26376.t1|CDO1-DANRE	0.0370639	0.048	0.025	1
g8468.t1|PA2A2-HELSU	0.0437817	0.113	0.075	1
g9539.t1|RTJK-DROME	0.0890116	0.364	0.306	1
g2954.t1|CLAT-RAT	-0.141547	0.077	0.107	1
g10514.t1|THYN1-DANRE	-0.125876	0.571	0.616	1
g2944.t1|TC1DB-XENLA	-0.0332599	0.019	0.037	1
g27870.t1|SFXN2-HUMAN	0.065949	0.046	0.023	1
g6693.t1|OXSR1-PIG	0.0450008	0.212	0.163	1
g22179.t1|TM10A-RAT	0.0491623	0.272	0.218	1
g25157.t1|NPY1R-XENLA	0.024544	0.01	0	1
g15789.t1|FGFR1-XENLA	0.0137089	0.01	0	1
g18019.t1|PUR9-HUMAN	0.0572023	0.107	0.072	1
g15690.t1|NAS13-CAEEL	-0.0530445	0.071	0.103	1
g20767.t1|CDYL2-MOUSE	0.0655527	0.308	0.252	1
g31925.t1|FAAA-BOVIN	0.0524139	0.145	0.104	1
g13400.t1|LZTL1-BOVIN	0.0657932	0.223	0.175	1
g27551.t1|GLMU-SYNJA	0.0518468	0.101	0.067	1
g26788.t1|GBRB3-RAT	0.0245652	0.018	0.004	1
g2666.t1|TFE2-RAT	0.0456504	0.186	0.141	1
g24335.t1|GA2L1-HUMAN	0.0917009	0.169	0.126	1
g5391.t1|CMIP-HUMAN	0.044634	0.061	0.035	1
g15774.t1|P2RX4-RAT	-0.0326968	0.017	0.034	1
g11363.t1|CBS-HUMAN	0.0548955	0.037	0.017	1
g29031.t1|NUD19-XENLA	0.0502845	0.133	0.095	1
g31014.t1|SCMC1-MOUSE	0.028115	0.036	0.016	1
g5581.t1|SELM-HUMAN	0.1027	0.652	0.617	1
g15830.t1|PDIA3-PONAB	-0.0902778	0.72	0.764	1
g29977.t1|CQ105-MOUSE	-0.0427318	0.028	0.049	1
g17835.t1|CP17A-ICTPU	-0.0172417	0.004	0.014	1
g24731.t1|RTJK-DROFU	0.0199733	0.077	0.047	1
g24823.t1|PLK1-RAT	0.0389329	0.05	0.027	1
g12532.t2|EP15R-HUMAN	0.0500424	0.346	0.289	1
g12747.t1|CAR11-HUMAN	-0.0606405	0.151	0.196	1
g4420.t1|TALDO-BOVIN	0.0138176	0.215	0.162	1
g29327.t1|VTI1A-HUMAN	0.0448436	0.137	0.098	1
g26462.t1|SYNG1-MACFA	0.0148896	0.013	0.002	1
g4489.t1|TRAP1-MOUSE	0.0803314	0.311	0.26	1
g8990.t1|CERS1-MOUSE	0.141797	0.522	0.488	1
g8971.t1|BMPH-STRPU	-0.0355695	0.262	0.197	1
g21990.t1|CCD40-HUMAN	0.0681788	0.069	0.042	1
g32917.t1|PEP7-YEAST	0.0286729	0.051	0.027	1
g26675.t1|STIMA-HUMAN	0.0556413	0.086	0.055	1
g1765.t1|CAB39-HUMAN	0.0555796	0.102	0.069	1
g30254.t1|ODPA-CAEEL	0.0678081	0.553	0.489	1
g10650.t1|YQK1-SCHPO	-0.0472527	0.084	0.117	1
g24657.t1|ASIC2-HUMAN	0.0682037	0.088	0.058	1
g13944.t1|SAG39-ORYSI	0.0148526	0.011	0.001	1
g2419.t1|E2F2-HUMAN	0.0429043	0.094	0.062	1
g32162.t1|BM1LA-DANRE	0.0738917	0.14	0.102	1
g31249.t1|NADA-APLKU	0.0124562	0.015	0.003	1
g19754.t1|RPTOR-HUMAN	0.033315	0.025	0.009	1
g29445.t1|EXOS3-BOVIN	0.0601778	0.098	0.066	1
g19908.t1|FACE1-HUMAN	-0.0966842	0.615	0.655	1
g29711.t1|DPH7-HUMAN	0.0586198	0.275	0.222	1
g13546.t2|PRIC3-MOUSE	0.0164646	0.021	0.006	1
g1744.t1|LAMA-DROME	0.136752	0.146	0.111	1
g27862.t1|NPFF2-RAT	-0.0123636	0.003	0.011	1
g14226.t2|TC3A-CAEEL	-0.0114572	0	0.004	1
g4662.t1|PSDE-DROME	0.0546446	0.327	0.272	1
g16442.t1|CEBPB-CHICK	0.0911195	0.355	0.3	1
g15810.t1|GRM3-MOUSE	0.00633304	0.019	0.005	1
g15747.t1|AIMP1-MOUSE	0.0682395	0.698	0.655	1
g19252.t1|Y1101-SYNY3	0.0955581	0.36	0.301	1
g11434.t1|RPB7-RAT	0.0845485	0.504	0.446	1
g14470.t1|MMP14-MOUSE	0.024505	0.011	0.001	1
g4856.t1|IP6K1-RAT	0.0750052	0.232	0.184	1
g11996.t2|TM175-DANRE	0.0571628	0.151	0.11	1
g21670.t1|ZFAN6-PONAB	0.0603586	0.89	0.88	1
g30446.t1|FBP1-STRPU	-0.0501831	0.109	0.145	1
g15640.t1|ZIC2B-XENLA	0.162565	0.158	0.122	1
g18364.t1|MAFK-CHICK	-0.138141	0.203	0.238	1
g30863.t1|CHMP3-XENTR	0.0340542	0.108	0.074	1
g5584.t1|PSMD9-RAT	0.0854567	0.184	0.142	1
g25773.t1|ANTA-HYDVU	0.0695772	0.024	0.009	1
g3130.t1|TM9S2-MOUSE	0.030413	0.168	0.126	1
g15325.t1|NDUA7-MOUSE	0.0498124	0.188	0.143	1
g25874.t1|DYI2-HELCR	-0.0388179	0.014	0.029	1
g32018.t1|STX1A-DROME	0.0500514	0.473	0.407	1
g32877.t1|BMP7-MOUSE	-0.0390146	0.065	0.095	1
g23479.t1|ACDSB-RAT	0.0575449	0.197	0.152	1
g33033.t1|IFT80-RAT	0.0420513	0.066	0.04	1
g217.t1|GLUCL-DROME	0.0642281	0.117	0.082	1
g19087.t1|CP4V2-HUMAN	0.0199678	0.14	0.1	1
g17531.t1|TEAN2-MOUSE	0.0425563	0.091	0.061	1
g29409.t1|HTXA-PSEST	0.0598668	0.06	0.035	1
g24957.t1|S39AD-DANRE	-0.0515818	0.053	0.079	1
g4822.t1|NFYC-PONAB	0.0364211	0.042	0.021	1
g27288.t1|AT1B1-CAVPO	0.017334	0.034	0.016	1
g1199.t1|BP10-PARLI	0.0190036	0.009	0	1
g20487.t1|BIRC7-MOUSE	0.0483296	0.098	0.066	1
g22929.t1|SO4C1-MOUSE	0.00803719	0.029	0.012	1
g23499.t1|GXN-ACRMI	-0.0820438	0.183	0.227	1
g23067.t1|RGPS2-MACFA	0.0682469	0.242	0.195	1
g27826.t1|TTC33-DANRE	0.0822925	0.192	0.151	1
g29421.t1|CRK-XENLA	0.0309116	0.081	0.052	1
g856.t1|ENDUB-DANRE	0.0599029	0.506	0.462	1
g29231.t1|SYSC-MOUSE	0.0717309	0.629	0.588	1
g27236.t1|TISB-MOUSE	0.0579195	0.408	0.349	1
g2004.t1|RHOAA-DANRE	0.122676	0.57	0.519	1
g10933.t1|ST38L-HUMAN	0.0362681	0.102	0.07	1
g20690.t1|ARRD3-RAT	-0.137998	0.143	0.175	1
g10118.t1|ANO10-HUMAN	0.0538266	0.074	0.047	1
g17741.t1|PGES2-DANRE	0.0614224	0.164	0.125	1
g3892.t1|GABT-HUMAN	0.0670872	0.084	0.056	1
g5752.t1|NUP88-RAT	0.0442978	0.17	0.131	1
g28136.t1|ANLN-HUMAN	0.0114231	0.222	0.272	1
g11774.t1|TTC25-DANRE	-0.0189734	0.026	0.045	1
g30601.t1|CHST3-CHICK	0.0125156	0.008	0	1
g8805.t1|NAL12-MOUSE	0.0087159	0.056	0.033	1
g4561.t1|PLRG1-HUMAN	0.051975	0.534	0.474	1
g20611.t1|ECT-ACRMI	0.0161147	0.018	0.005	1
g14832.t1|MFD6B-DANRE	0.0188982	0.019	0.006	1
g13223.t1|PRD13-MOUSE	0.00658708	0.019	0.006	1
g15730.t1|PMYT1-XENLA	0.0317127	0.214	0.17	1
g11437.t1|ZN363-HUMAN	0.0265848	0.095	0.065	1
g16546.t1|CE162-DANRE	0.0323074	0.081	0.053	1
g32577.t1|CA2D1-HUMAN	0.0468528	0.166	0.126	1
g10420.t1|SCRIB-HUMAN	0.03211	0.104	0.073	1
g14867.t1|MIOX-DANRE	0.052798	0.079	0.051	1
g22222.t1|ZDHC2-ARATH	0.0247436	0.097	0.066	1
g9975.t1|STK36-HUMAN	-0.00869562	0.001	0.007	1
g9835.t1|AZIN2-XENLA	0.148713	0.993	0.988	1
g31999.t1|I4E3B-XENLA	0.0699238	0.144	0.108	1
g23834.t1|SPX3-XENLA	0.0156633	0.01	0.001	1
g22612.t1|AR1-XENLA	0.0383063	0.106	0.074	1
g29382.t1|FIG4-MOUSE	0.0674821	0.14	0.105	1
g3473.t3|SCAM1-RAT	0.0607706	0.137	0.102	1
g530.t1|GUS-DROME	-0.140763	0.302	0.335	1
g3713.t2|HMCN2-HUMAN	0.0166096	0.012	0.002	1
g29286.t1|SETX-HUMAN	0.0797389	0.164	0.128	1
g23435.t1|S2611-HUMAN	-0.0861996	0.029	0.048	1
g17044.t1|ACH92-ONCMY	0.00922839	0.008	0	1
g24061.t1|OPA1-CHICK	0.03759	0.219	0.174	1
g24892.t1|TRPC5-MOUSE	-0.0182523	0.004	0.012	1
g29507.t1|OSBL9-XENTR	0.0612619	0.206	0.165	1
g5967.t1|UBCD1-DROME	0.0654086	0.817	0.785	1
g28166.t1|PFI-PTIFI	-0.0474908	0.041	0.064	1
g12607.t1|CFA97-XENTR	0.0424325	0.093	0.064	1
g24376.t1|MCPI-MELCP	0.0385158	0.097	0.067	1
g11355.t1|CO4A2-ASCSU	0.262156	0.327	0.298	1
g25081.t1|CCNA-HYDVD	0.0452427	0.109	0.077	1
g17059.t2|MPDZ-HUMAN	0.102589	0.21	0.169	1
g3417.t1|STRN3-MOUSE	0.0612177	0.389	0.339	1
g28832.t1|SDC3-CHICK	-0.0827595	0.815	0.802	1
g11400.t1|AT11B-HUMAN	0.0476562	0.099	0.069	1
g23560.t1|ACD11-CAEEL	0.0283908	0.035	0.018	1
g28217.t1|PP1R8-MOUSE	0.058563	0.16	0.124	1
g25565.t1|ODF3A-XENLA	0.0112665	0.013	0.003	1
g7935.t1|GPR18-AMPAM	0.015094	0.01	0.001	1
g13478.t1|MFSD6-MOUSE	0.0138439	0.01	0.001	1
g29749.t1|BOULE-DROME	0.0152688	0.011	0.002	1
g17540.t1|AVR2A-CHICK	0.0267291	0.232	0.187	1
g13019.t1|PRPX-HORVU	-0.24173	0.17	0.196	1
g6139.t1|TSP2-MOUSE	0.0791824	0.033	0.016	1
g30036.t1|LTV1-MOUSE	0.0675765	0.691	0.64	1
g6033.t1|KLHL5-HUMAN	0.0381905	0.077	0.05	1
g7639.t2|PERQ2-XENLA	-0.0889365	0.029	0.047	1
g11725.t3|TRA2B-RAT	0.0642579	0.486	0.433	1
g13907.t1|HUNK-MOUSE	-0.360143	0.429	0.413	1
g17485.t1|RUVB2-XENLA	-0.102712	0.218	0.26	1
g30832.t1|EXOC5-MOUSE	0.0600536	0.148	0.113	1
g33035.t1|PRKX-MOUSE	-0.0578686	0.058	0.082	1
g26881.t2|RGS12-HUMAN	0.0663465	0.224	0.182	1
g9132.t1|KIF2A-CHICK	0.0595906	0.158	0.121	1
g14904.t1|SYT11-HUMAN	-0.0632717	0.07	0.097	1
g8989.t1|TBC24-XENTR	0.0528354	0.135	0.102	1
g2323.t1|SRSF4-MOUSE	0.0723504	0.52	0.465	1
g12890.t1|HGNAT-HUMAN	0.0190345	0.1	0.07	1
g7065.t1|MYCPP-HUMAN	0.052165	0.445	0.391	1
g6549.t1|GAPR1-MOUSE	0.247119	0.05	0.03	1
g16905.t1|FICD-NEMVE	0.0238361	0.05	0.029	1
g19577.t1|CATZ-RAT	0.173359	0.333	0.3	1
g27329.t1|GLNA-XENLA	-0.522588	0.072	0.094	1
g2010.t1|PKHG5-HUMAN	0.0544533	0.085	0.058	1
g14901.t1|TFDP1-BOVIN	0.0555124	0.092	0.064	1
g236.t1|LIP1-PSYIM	-0.0647773	0.145	0.182	1
g12603.t1|TSN5-BOVIN	0.00468857	0.179	0.137	1
g29680.t1|SPEN-DROME	0.0403256	0.141	0.106	1
g12096.t1|DDC-RAT	0.0434042	0.135	0.1	1
g25223.t1|ALG3-HUMAN	0.0471642	0.086	0.059	1
g29570.t1|TPPC2-XENTR	0.0579532	0.132	0.099	1
g7872.t1|OIT3-MOUSE	-0.0221337	0.008	0.019	1
g15244.t1|RIBC2-HUMAN	-0.00561392	0.119	0.155	1
g9107.t1|KIF28-MOUSE	0.0385644	0.136	0.102	1
g29981.t1|TRIPC-XENTR	-0.112532	0.244	0.279	1
g4435.t1|NECB-HYDVU	-0.15815	0.771	0.788	1
g249.t1|MARC2-BOVIN	0.0267212	0.167	0.128	1
g18296.t1|HEBP2-MOUSE	0.0128826	0.026	0.012	1
g5275.t1|KCNB2-MOUSE	0.0193838	0.029	0.013	1
g32290.t1|TREF1-HUMAN	0.0281105	0.057	0.035	1
g8582.t1|TMM19-XENTR	0.0724155	0.099	0.071	1
g23713.t1|PH4H-RAT	0.0759403	0.135	0.101	1
g20684.t1|NEO1-HUMAN	0.0458323	0.044	0.025	1
g14614.t1|API5-MOUSE	0.0249217	0.242	0.197	1
g7516.t1|TAF5L-MOUSE	0.0400794	0.058	0.035	1
g4438.t1|DRAM1-XENLA	0.0316123	0.058	0.036	1
g27303.t1|SF3B6-MOUSE	0.029976	0.301	0.252	1
g30467.t1|CCKAR-XENLA	0.0135896	0.017	0.005	1
g33794.t1|MYPH-ECHGR	-0.0555547	0.617	0.673	1
g29257.t1|SGCG-CANLF	0.0624024	0.214	0.173	1
g12357.t1|OSB10-HUMAN	0.00903672	0.083	0.056	1
g10493.t1|NFI1L-DANRE	0.0630237	0.273	0.227	1
g14159.t1|G3ST2-MOUSE	0.0142614	0.009	0.001	1
g7008.t1|SOX7-XENLA	0.0241349	0.025	0.011	1
g18066.t1|GRM8-HUMAN	-0.00245061	0	0.003	1
g1595.t1|OPSD-LOXAF	-0.00338261	0	0.003	1
g26083.t1|LOX5-MESAU	-0.00404598	0	0.003	1
g28264.t1|KCA10-CHICK	-0.00557025	0.002	0.008	1
g19617.t1|CLH1-MOUSE	0.0483899	0.297	0.249	1
g17154.t1|DPP2-RAT	0.163566	0.176	0.145	1
g24406.t1|FGFR1-HUMAN	-0.113701	0.187	0.221	1
g33344.t1|RB1BV-BETVU	-0.221075	0.129	0.154	1
g31460.t1|NPHP3-HUMAN	0.0223793	0.027	0.012	1
g22557.t1|ZN235-MOUSE	0.0421316	0.381	0.324	1
g27421.t1|SPF45-HUMAN	0.0550909	0.383	0.335	1
g30304.t1|MCPI-MELCP	0.330735	0.421	0.523	1
g17139.t1|NEO1-CHICK	0.0368505	0.13	0.097	1
g23437.t1|YS51-CAEEL	-0.26925	0.702	0.594	1
g15808.t1|TRF6A-XENLA	-0.0157125	0.018	0.032	1
g21491.t1|TLR1-DROME	0.0177149	0.022	0.009	1
g9538.t1|SF3B5-HUMAN	0.0718113	0.374	0.325	1
g22122.t1|ASPC1-HUMAN	0.032466	0.03	0.015	1
g28187.t1|DIDO1-MOUSE	0.0392138	0.106	0.076	1
g14071.t1|LTBP1-MOUSE	0.0118145	0.012	0.003	1
g10518.t1|DRGX-HUMAN	0.120126	0.066	0.043	1
g25069.t1|FORH-DICDI	0.042693	0.133	0.101	1
g18192.t1|QSOX1-MOUSE	0.0203491	0.057	0.035	1
g11008.t1|MCCB-MOUSE	0.0297404	0.232	0.189	1
g13406.t1|S39AE-MOUSE	0.0228179	0.123	0.091	1
g17846.t1|VPS51-XENTR	0.0487544	0.488	0.444	1
g3126.t1|ANK3-MOUSE	-0.025501	0.004	0.012	1
g5755.t1|RASEF-XENTR	0.0535273	0.217	0.175	1
g8335.t1|WIPI3-CHICK	0.034462	0.12	0.089	1
g7629.t1|RAB1A-RAT	0.0344682	0.161	0.125	1
g22990.t1|GULP1-DANRE	0.0948492	0.307	0.261	1
g30759.t1|CEL3B-MOUSE	-0.0214885	0.022	0.037	1
g11288.t2|DCLK3-HUMAN	0.0208557	0.006	0	1
g7666.t1|PKHL1-MOUSE	0.00904381	0.006	0	1
g32956.t1|IF4G1-HUMAN	0.030731	0.028	0.013	1
g11956.t2|VP13D-HUMAN	0.016925	0.156	0.121	1
g25353.t1|MYPT1-HUMAN	0.0204072	0.016	0.005	1
g19787.t1|EPT1-HUMAN	0.0139913	0.063	0.041	1
g6155.t1|GRM3-RAT	0.0792939	0.06	0.039	1
g506.t1|CP17A-RANDY	0.0699281	0.025	0.012	1
g5969.t1|MTCH2-PONAB	0.0194337	0.152	0.117	1
g16689.t1|GRB10-PIG	0.0568647	0.264	0.22	1
g6898.t1|CDC73-MOUSE	0.0260526	0.186	0.149	1
g29412.t1|ECE1-CAVPO	0.107268	0.295	0.259	1
g10513.t1|MCTS1-MOUSE	0.0338911	0.457	0.401	1
g29627.t1|MFSD7-DANRE	0.0587908	0.183	0.146	1
g28303.t1|CHI2-TOBAC	0.0382051	0.029	0.014	1
g4581.t1|RAB1A-RAT	0.0641336	0.587	0.546	1
g21479.t1|CCH1R-DROME	0.0411562	0.02	0.008	1
g22714.t1|GCC2-MOUSE	-0.0895297	0.073	0.096	1
g32700.t1|G6PC2-HUMAN	0.0112628	0.043	0.025	1
g20622.t1|ZBED4-HUMAN	0.0209087	0.037	0.02	1
g15066.t2|PASK-MOUSE	0.0135655	0.013	0.004	1
g27403.t1|SMBT2-HUMAN	0.0323676	0.223	0.183	1
g23944.t1|CO6A4-MOUSE	-0.0177101	0.003	0.009	1
g3957.t1|NDL1B-DANRE	-0.121107	0.463	0.49	1
g27495.t1|ACM2-CAEEL	0.0169144	0.006	0	1
g3127.t1|OCTB1-DROME	0.0130912	0.006	0	1
g14108.t1|AGRD1-MOUSE	0.0177899	0.025	0.012	1
g19768.t2|RASS-DICDI	0.0156583	0.029	0.014	1
g33545.t1|AGRL3-HUMAN	-0.0214002	0.005	0.012	1
g13602.t1|KCC4-RAT	0.0333376	0.069	0.047	1
g23948.t1|T23O-TRICA	-0.0194239	0.021	0.035	1
g25566.t1|RM20-XENLA	0.0235888	0.1	0.073	1
g33102.t1|OPSC2-HEMSA	0.0611466	0.085	0.06	1
g33253.t1|KANK3-MOUSE	0.0755431	0.164	0.132	1
g16871.t1|TMTC2-HUMAN	-0.0945897	0.675	0.677	1
g17010.t1|TMC7-MACFA	-0.0137122	0	0.004	1
g32157.t1|GREM1-XENLA	-0.222496	0.42	0.433	1
g18326.t1|TDRD1-HUMAN	0.0251818	0.074	0.051	1
g6596.t1|ZBED4-HUMAN	0.0554939	0.136	0.105	1
g12061.t1|GFPT2-BOVIN	0.0697813	0.46	0.403	1
g15221.t1|MFSD8-HUMAN	0.0172311	0.052	0.033	1
g24751.t1|CAPSL-HUMAN	0.0124549	0.01	0.002	1
g8918.t1|POPD1-DANRE	0.0110748	0.019	0.008	1
g31818.t1|ZN593-XENTR	0.0264747	0.207	0.17	1
g27009.t1|BROX-DANRE	0.0438738	0.221	0.182	1
g12150.t1|U2AF2-DROME	0.0142692	0.051	0.032	1
g30370.t1|CIRBP-LITCT	0.0592396	0.763	0.727	1
g14977.t1|VP33A-RAT	0.0375065	0.159	0.126	1
g1890.t1|IDH3B-RAT	0.0077753	0.102	0.074	1
g22246.t1|IFT52-HUMAN	0.0133343	0.014	0.004	1
g12054.t1|TM107-DANRE	-0.0363509	0.015	0.027	1
g3308.t1|ZDHC8-MOUSE	0.00343611	0.14	0.107	1
g24939.t1|INS1B-DANRE	0.0225444	0.017	0.006	1
g25092.t1|TSN33-MOUSE	0.0923776	0.473	0.429	1
g32228.t1|SNX32-HUMAN	0.065447	0.363	0.319	1
g28831.t1|STT3A-BOVIN	-0.154676	0.252	0.276	1
g10051.t1|HXD3-XENLA	0.0446729	0.024	0.012	1
g22825.t1|TM9S1-MOUSE	0.0150924	0.296	0.249	1
g19935.t1|EIF3B-RAT	-0.0939408	0.686	0.71	1
g15293.t1|GDF8-OREMO	-0.0278971	0.014	0.026	1
g19877.t1|CASR-RAT	0.0185141	0.031	0.017	1
g12158.t1|DING-BACSU	0.0392103	0.109	0.081	1
g4665.t1|MLP3A-BOVIN	0.0165708	0.02	0.009	1
g29709.t1|PARVA-RAT	0.0377589	0.131	0.101	1
g11794.t1|RTXE-DROME	0.019006	0.023	0.011	1
g1768.t1|NAA50-XENLA	0.0677721	0.536	0.489	1
g33394.t1|MA2C1-MOUSE	0.0572715	0.415	0.372	1
g31386.t1|CSRP3-BOVIN	0.0810787	0.869	0.864	1
g25158.t1|NPY5R-HUMAN	0.022576	0.009	0.002	1
g5851.t1|CERS6-MOUSE	-0.0780488	0.159	0.193	1
g22671.t1|TWF1-HUMAN	0.0420736	0.058	0.038	1
g27988.t1|MOT10-DANRE	0.0152411	0.009	0.002	1
g1465.t1|RED1-RAT	0.0264836	0.362	0.313	1
g19288.t1|TUTL-DROME	0.0295062	0.021	0.01	1
g11205.t1|KCNA1-HUMAN	0.0127765	0.008	0.001	1
g30191.t1|LIN1-NYCCO	-0.0599605	0.143	0.174	1
g22985.t1|NPHP3-HUMAN	0.0131408	0.03	0.016	1
g22803.t1|MAK16-BOVIN	-0.061563	0.392	0.43	1
g10123.t1|RETST-DANRE	0.01339	0.015	0.005	1
g32989.t1|PPCE-HUMAN	0.0396011	0.057	0.037	1
g27590.t1|ZN143-XENTR	0.0220846	0.1	0.074	1
g4297.t1|PTN14-MOUSE	0.0309573	0.057	0.038	1
g11150.t1|AGO2-MOUSE	0.0857734	0.48	0.419	1
g29105.t1|PHYD1-DANRE	-0.00922414	0.045	0.065	1
g21068.t1|CAH1-MOUSE	0.024433	0.048	0.03	1
g22815.t1|TCB1-CAEBR	0.0620418	0.11	0.085	1
g1877.t1|POXA-DICDI	0.0288779	0.068	0.047	1
g13906.t1|FA76A-CHICK	-0.111623	0.307	0.335	1
g25004.t1|KI11B-XENLA	-0.0661211	0.094	0.12	1
g12411.t2|SWT1-MOUSE	0.0531368	0.155	0.124	1
g26569.t1|LAC3-BOTFU	-0.0576932	0.033	0.05	1
g33267.t1|VIAAT-XENTR	0.0178729	0.011	0.003	1
g33448.t1|HRH2-MOUSE	0.00508661	0.024	0.012	1
g1320.t1|SULF1-MOUSE	0.0398397	0.132	0.102	1
g29766.t1|WRIP1-HUMAN	-0.0661019	0.098	0.123	1
g11692.t1|RIPL1-MOUSE	0.0458	0.191	0.158	1
g30158.t1|EGTB-MYCS2	-0.0110842	0.01	0.019	1
g20530.t1|NUP43-HUMAN	0.0443744	0.108	0.082	1
g13813.t1|ATG4B-CHICK	-0.0314346	0.02	0.033	1
g4605.t1|PDRG1-RAT	0.060573	0.244	0.207	1
g2610.t1|DPO3-OCEIH	0.0513002	0.051	0.034	1
g3985.t1|BBS4-HUMAN	0.0143771	0.036	0.021	1
g32991.t1|TX264-HUMAN	0.0138406	0.138	0.108	1
g14571.t1|UB2V2-CHICK	0.0585504	0.318	0.28	1
g187.t1|SGF29-HUMAN	-0.0832229	0.156	0.185	1
g22170.t1|C5AR1-PONPY	0.0150295	0.015	0.005	1
g27958.t1|KCNH5-HUMAN	0.0156864	0.009	0.002	1
g22559.t1|ZRC1-YEAST	0.0113897	0.009	0.002	1
g29800.t1|GDS1B-XENLA	0.0537099	0.204	0.17	1
g25542.t1|GMFB-PONAB	0.0351974	0.144	0.113	1
g30528.t1|S6A20-RAT	-0.0905552	0.072	0.093	1
g17491.t1|DDAC-ENTAG	-0.00742899	0.026	0.041	1
g13190.t1|DCPS-PIG	0.0645795	0.316	0.273	1
g30932.t1|GTPB6-HUMAN	0.0265348	0.088	0.065	1
g24632.t1|CLR4-SCHPO	0.0362745	0.154	0.122	1
g1882.t1|SNTB1-MOUSE	0.0318385	0.222	0.185	1
g17625.t1|T2EA-PONAB	0.00282449	0.071	0.05	1
g10494.t1|ITPA-NEMVE	0.04568	0.241	0.204	1
g32679.t1|Y1199-DICDI	-0.0147823	0.008	0.016	1
g7335.t1|CHP1-BOVIN	0.0494036	0.279	0.235	1
g8589.t1|S2536-CHICK	0.0360135	0.082	0.059	1
g1836.t1|SX17A-XENTR	0.0165005	0.018	0.008	1
g31372.t1|GLI3-HUMAN	0.0448249	0.133	0.105	1
g11042.t1|TNF10-HUMAN	0.0244968	0.158	0.127	1
g25963.t1|PTPRD-HUMAN	0.0080853	0.162	0.129	1
g22962.t1|ANKL2-MOUSE	0.0166103	0.082	0.059	1
g29020.t1|RGL1-DANRE	-0.147051	0.276	0.303	1
g33671.t1|TDCB-STAAW	0.032871	0.204	0.168	1
g13436.t1|DAPLE-XENLA	0.0172768	0.257	0.216	1
g11352.t1|CO4A1-DROME	0.202811	0.401	0.368	1
g16847.t1|FUT3-BOVIN	0.0215607	0.026	0.013	1
g6402.t1|KPB1-RABIT	-0.04666	0.067	0.089	1
g13016.t1|KLH20-CHICK	0.0470046	0.232	0.198	1
g16838.t1|NRIF2-MOUSE	0.0378769	0.417	0.368	1
g13601.t1|HMCN2-HUMAN	0.00852571	0.093	0.12	1
g21243.t1|MCAF1-CHICK	-0.177689	0.39	0.408	1
g1747.t1|RN139-MOUSE	0.0153554	0.028	0.015	1
g16434.t1|PZRN3-HUMAN	0.047866	0.409	0.361	1
g16813.t1|TOM1-ASHGO	0.00959764	0.057	0.038	1
g21605.t1|SYMC-XENLA	0.0228393	0.155	0.125	1
g3112.t1|ARRB1-MACFA	0.0620659	0.48	0.428	1
g11545.t1|ADM1A-MOUSE	0.0107896	0.014	0.005	1
g16230.t1|NK2R-CAVPO	0.0717009	0.047	0.031	1
g27641.t1|AKTS1-MOUSE	0.0351962	0.103	0.078	1
g21095.t1|JADE3-MOUSE	0.0107515	0.104	0.079	1
g11059.t1|PSD2-HUMAN	0.0217685	0.11	0.084	1
g11219.t1|TIM50-DANRE	0.037209	0.124	0.097	1
g14955.t1|UCPB-DICDI	0.0200803	0.094	0.07	1
g14067.t1|TBCD9-MOUSE	0.00792134	0.103	0.077	1
g32850.t1|PI5PA-MOUSE	0.0415547	0.263	0.224	1
g18428.t1|CSKI1-RAT	0.00638106	0.007	0.001	1
g9287.t1|YUGO-BACSU	0.0067498	0.007	0.001	1
g29375.t1|SAXO1-RAT	0.0363712	0.106	0.081	1
g32707.t1|RTN4-HUMAN	0.0199569	0.082	0.059	1
g14502.t1|NUDT9-HUMAN	0.090567	0.458	0.415	1
g21405.t1|SAMH1-HUMAN	0.0243279	0.033	0.019	1
g22541.t1|AVIL-MOUSE	0.25725	0.27	0.25	1
g17215.t1|TPC10-MOUSE	0.0146111	0.053	0.035	1
g21675.t1|RB11B-DIPOM	0.0200351	0.159	0.128	1
g10331.t1|MO4L1-RAT	0.0527738	0.184	0.151	1
g18010.t1|AB1IP-MOUSE	-0.0815435	0.097	0.12	1
g11373.t1|PEX6-DICDI	-0.00490358	0.024	0.012	1
g29944.t1|N2F1B-DANRE	0.0152118	0.017	0.007	1
g522.t2|CFA61-HUMAN	-0.00979027	0.003	0.008	1
g6871.t1|RN181-DANRE	0.0493289	0.504	0.461	1
g4815.t1|OAT-DROME	0.0519259	0.27	0.231	1
g2698.t1|GPAT1-PIG	0.0185163	0.054	0.036	1
g10796.t1|IF4G1-ORYSJ	0.0119628	0.075	0.054	1
g27244.t1|KPC2-APLCA	-0.0432024	0.027	0.041	1
g14672.t1|VPS41-MOUSE	0.0490659	0.08	0.059	1
g30512.t1|RS40-ARATH	0.0274871	0.702	0.669	1
g31735.t1|EAA1-AMBTI	-0.0660291	0.032	0.047	1
g28492.t2|KLH20-RAT	0.00979169	0.05	0.033	1
g23846.t1|CCD92-HUMAN	0.0572128	0.073	0.053	1
g18818.t1|RAB3B-BOVIN	0.0062856	0.112	0.086	1
g3331.t1|H2A-ASTRU	0.0427988	0.219	0.186	1
g33566.t1|KPCI-HUMAN	0.00725073	0.024	0.012	1
g22786.t1|SC5A8-HUMAN	-0.0145328	0.017	0.028	1
g3948.t2|LAMA-EMENI	0.0161954	0.006	0.001	1
g4463.t1|ZMY10-DANRE	-0.0372951	0.024	0.036	1
g16033.t1|DIRA-CAEEL	-0.00317884	0	0.002	1
g30660.t2|SNX11-MOUSE	-0.00375159	0	0.002	1
g9950.t1|S2611-MOUSE	-0.00557433	0	0.002	1
g9841.t1|TCF15-MESAU	0.0218262	0.016	0.007	1
g17506.t1|AT12A-HUMAN	-0.00459766	0.013	0.023	1
g21488.t1|OPN4B-XENLA	-0.00937347	0.001	0.005	1
g17754.t1|S36A1-HUMAN	-0.00219489	0.001	0.005	1
g11169.t1|NHLC2-CHICK	-0.00249236	0.057	0.039	1
g10014.t1|ELL-HUMAN	-0.0797915	0.832	0.833	1
g4434.t1|UBP47-MOUSE	0.0242702	0.086	0.065	1
g29414.t1|AA2AR-HUMAN	0.0397016	0.067	0.048	1
g30639.t1|NAS13-CAEEL	0.0202348	0.318	0.279	1
g29039.t1|RBL1-MOUSE	0.0275375	0.034	0.02	1
g24660.t1|FRRS1-XENLA	0.0441346	0.072	0.053	1
g10106.t1|CSMD1-HUMAN	-0.00772204	0.258	0.217	1
g12584.t1|DCTN1-XENLA	0.0262009	0.387	0.339	1
g17289.t2|ADA10-BOVIN	-0.0563963	0.186	0.213	1
g2463.t1|DNAJ-LEGPN	0.00561393	0.004	0	1
g2041.t1|GPR18-AMPAM	0.00520706	0.004	0	1
g22189.t1|DCOR-MUSPA	0.00400312	0.004	0	1
g14107.t1|RIMK-SERP5	0.0609118	0.283	0.246	1
g7398.t1|PAPSS-URECA	0.106353	0.531	0.504	1
g5312.t1|GO45-HUMAN	0.0366514	0.104	0.081	1
g32849.t1|MK01-BOVIN	0.0365261	0.213	0.18	1
g25884.t1|NEC1-RAT	0.0418183	0.038	0.024	1
g12368.t1|KCNA2-HUMAN	0.016379	0.02	0.01	1
g13980.t1|COMA-CONMA	-0.00638116	0.005	0.012	1
g4905.t1|TBA1C-BOVIN	0.0286778	0.278	0.239	1
g16331.t2|TOP2B-HUMAN	-0.0101286	0.008	0.015	1
g22688.t1|F26L-CHICK	0.00517933	0.016	0.007	1
g32399.t1|CNFNA-XENLA	-0.0082741	0.013	0.023	1
g3418.t1|IP3KA-HUMAN	-0.0136069	0.283	0.241	1
g14839.t1|MFD6B-DANRE	0.0143991	0.006	0.001	1
g30419.t1|KIF3A-HUMAN	0.0151734	0.006	0.001	1
g11969.t1|HMCN1-MOUSE	0.00799776	0.006	0.001	1
g26446.t2|ERGI3-DANRE	0.120763	0.672	0.614	1
g562.t1|KCNA1-HUMAN	-0.00552771	0.001	0.004	1
g15515.t1|S35F6-PONAB	0.0102973	0.077	0.057	1
g14255.t1|NB5R3-PIG	0.0458753	0.435	0.402	1
g4307.t1|KALRN-HUMAN	0.0440524	0.043	0.028	1
g25247.t1|CAH6-BOVIN	0.00794724	0.009	0.003	1
g28594.t1|ROBO3-MOUSE	0.190272	0.285	0.262	1
g27953.t1|SMAD2-MOUSE	0.0124916	0.075	0.055	1
g24984.t2|RGS22-HUMAN	0.0208294	0.045	0.03	1
g17574.t1|CAC1A-APIME	0.0159943	0.011	0.004	1
g24400.t1|DJC16-MOUSE	0.0101526	0.076	0.057	1
g14252.t1|MAD-DROME	0.0529935	0.217	0.186	1
g4672.t1|EGGS-SCHMA	0.00225581	0.013	0.005	1
g9853.t1|NRDE2-HUMAN	0.0196179	0.121	0.096	1
g1517.t1|CDC5L-NEMVE	0.0447543	0.361	0.32	1
g15041.t1|UN93A-XENLA	0.0107855	0.004	0	1
g25121.t1|CHI3-CANAL	0.00438727	0.004	0	1
g11005.t1|S18B1-HUMAN	-0.025243	0.011	0.019	1
g25905.t1|FBN3-HUMAN	0.0637545	0.039	0.026	1
g3974.t1|GNPTG-MOUSE	0.0390482	0.091	0.069	1
g13309.t1|SYIC-HUMAN	-0.0561068	0.095	0.116	1
g22270.t1|ACINU-MOUSE	-0.117527	0.261	0.283	1
g29444.t1|PICAL-RAT	-0.00903652	0.447	0.401	1
g32188.t1|SMD2-CAEEL	-0.114232	0.512	0.523	1
g12137.t1|ITPK1-CHICK	0.0454309	0.445	0.401	1
g6979.t1|MTFR2-BOVIN	0.0293038	0.112	0.088	1
g19680.t1|OVCA2-DANRE	-0.00398952	0.072	0.052	1
g31929.t1|MYRIP-DANRE	-0.00799935	0.274	0.238	1
g22719.t1|VCLAP-EHV2	0.0133185	0.163	0.134	1
g24716.t1|E41L4-DANRE	0.00370771	0.053	0.036	1
g23932.t1|MOONR-HUMAN	-0.0323206	0.084	0.105	1
g33493.t2|FOXO-DROAN	-0.00843737	0.001	0.004	1
g9576.t1|CALUB-SALSA	-0.00550391	0.001	0.004	1
g33441.t1|PISD-CRIGR	-0.00567322	0.001	0.004	1
g32101.t1|ANR52-DANRE	-0.00237345	0.001	0.004	1
g5289.t1|HYOU1-DANRE	-0.127368	0.446	0.466	1
g10020.t1|KCNQ1-XENLA	0.0314296	0.039	0.026	1
g27925.t3|TORSO-BOMMO	0.0375759	0.047	0.032	1
g1266.t1|AOSL-PLEHO	-0.0162236	0.003	0.008	1
g8496.t2|MIPT3-RAT	0.0513959	0.243	0.211	1
g15883.t2|UN13A-HUMAN	-0.00150189	0.02	0.011	1
g17111.t1|RET-MOUSE	-0.0102838	0	0.003	1
g16084.t1|PI5K6-ARATH	0.0399469	0.264	0.229	1
g17459.t2|CE104-HUMAN	0.0357365	0.301	0.26	1
g32348.t1|SC23A-XENTR	-0.0937653	0.282	0.303	1
g16072.t1|P5CR1-BOVIN	0.0381595	0.048	0.033	1
g18987.t1|VA714-ARATH	0.0242722	0.184	0.155	1
g29928.t1|TCPE-RAT	-0.078014	0.574	0.583	1
g20553.t1|LCE-ORYLA	0.00962633	0.019	0.01	1
g2195.t1|ARL1-RAT	0.0261892	0.427	0.381	1
g1749.t1|ANM1-XENTR	-0.0600345	0.472	0.507	1
g18226.t1|KBL-HUMAN	0.00346647	0.346	0.306	1
g27076.t1|WDTC1-HUMAN	0.0198527	0.088	0.067	1
g33380.t1|IF43A-SALSA	0.0126529	0.046	0.031	1
g18700.t1|ABHD2-MOUSE	0.0164278	0.129	0.103	1
g21102.t1|NMDZ1-HUMAN	0.00423926	0.015	0.007	1
g1348.t1|CCDC6-HUMAN	0.0395203	0.624	0.587	1
g2287.t1|CAZ-DROME	0.0460908	0.295	0.262	1
g7128.t1|VIAAT-XENLA	0.00618336	0.004	0	1
g28335.t1|GBRB1-BOVIN	0.00597212	0.004	0	1
g31982.t1|BAG6A-XENLA	0.0458115	0.205	0.174	1
g4803.t1|BRA-PATPE	0.0213554	0.014	0.006	1
g29264.t1|DOCK1-HUMAN	0.0338156	0.083	0.064	1
g528.t1|WDR33-MOUSE	0.0135899	0.137	0.112	1
g15683.t1|COQ8B-DANRE	0.0150001	0.069	0.05	1
g9209.t1|DNLI3-HUMAN	0.0203869	0.019	0.01	1
g17783.t1|KFA-MOUSE	0.0608806	0.065	0.049	1
g31717.t3|ATTY-MOUSE	0.0323579	0.025	0.014	1
g19235.t1|NOL4-HUMAN	0.00787344	0.07	0.051	1
g4486.t1|DGLA-MOUSE	0.0623031	0.071	0.054	1
g27309.t1|FAM21-PONAB	0.012449	0.302	0.264	1
g9270.t1|BCAT-MONBE	-0.00771198	0.004	0.009	1
g22276.t1|MCM4B-XENLA	-0.0265588	0.022	0.033	1
g74.t1|PLAP-RAT	-0.0578893	0.085	0.105	1
g7382.t1|SAM9L-MOUSE	0.0111062	0.027	0.016	1
g11023.t1|UBP4-RAT	0.026592	0.033	0.021	1
g30894.t1|FGFR-HYDVU	-0.0448195	0.03	0.043	1
g30956.t1|LIN41-DANRE	-0.00727509	0.004	0.009	1
g13013.t1|SEC24-CRYNJ	0.00694849	0.021	0.012	1
g26375.t1|CDO1-DANRE	0.0148594	0.175	0.145	1
g17949.t1|NPHP3-HUMAN	0.00664838	0.009	0.003	1
g8604.t1|WDR74-BOVIN	-0.0630223	0.179	0.205	1
g1475.t1|ZIFL1-ARATH	0.00384098	0.005	0.001	1
g21913.t1|HEM2-HUMAN	0.0158457	0.026	0.015	1
g11761.t1|CASP8-RAT	0.0287992	0.05	0.035	1
g20052.t1|ATD3B-XENLA	-0.0728162	0.272	0.302	1
g7150.t1|ATP5E-IPOBA	0.0101104	0.022	0.012	1
g19189.t1|TYW1-XENLA	-0.0908714	0.334	0.358	1
g8475.t1|DDX42-CHICK	0.0232691	0.497	0.448	1
g18471.t1|TC1D2-HUMAN	0.0230848	0.065	0.049	1
g20374.t1|DCAF7-MOUSE	0.00878383	0.125	0.101	1
g1705.t1|ANR44-HUMAN	-0.0332566	0.138	0.164	1
g30864.t1|P5CS-PONAB	-0.0121268	0.02	0.031	1
g28208.t1|FGFR2-CHICK	0.413396	0.214	0.199	1
g10338.t1|SVEP1-MOUSE	-0.0122748	0.003	0.007	1
g20794.t1|QRFPR-RAT	-0.0131988	0.002	0.005	1
g30455.t1|FBXL2-PONAB	-0.00801999	0.002	0.005	1
g16379.t1|DRC7-XENTR	0.0306535	0.057	0.042	1
g33688.t1|PABP2-DROPS	-0.0924343	0.563	0.57	1
g28310.t1|ETV1-MOUSE	-0.00533638	0.004	0.01	1
g21409.t1|GNAS-ANOGA	-0.0632393	0.359	0.381	1
g5105.t1|VWKA-DICDI	0.0148495	0.012	0.005	1
g24509.t2|RTJK-DROME	-5.02478e-05	0.041	0.027	1
g3801.t2|RFX6-DANRE	0.00569571	0.003	0	1
g26755.t1|TCB1-CAEBR	0.0040758	0.003	0	1
g308.t1|GRM8-HUMAN	0.00347743	0.003	0	1
g12809.t1|RT35-BOVIN	0.0172994	0.022	0.012	1
g19670.t1|ASTER-MOUSE	-0.0863731	0.586	0.603	1
g202.t1|YTHD2-HUMAN	-0.0894414	0.244	0.265	1
g5003.t2|GAPR1-MOUSE	0.00839238	0.016	0.008	1
g12998.t1|GDAP2-NEMVE	0.0355966	0.067	0.05	1
g17505.t1|CDC71-ENCCU	-0.00287595	0.018	0.01	1
g26547.t1|STN1-AILME	0.0195374	0.015	0.007	1
g12533.t1|KAD3-MOUSE	0.00882433	0.019	0.011	1
g13729.t1|ACADV-RAT	0.0105539	0.019	0.011	1
g27535.t1|PSA3-HUMAN	0.0238392	0.302	0.269	1
g30719.t1|ACD10-HUMAN	0.025982	0.079	0.061	1
g4572.t1|CLIC1-HUMAN	0.072953	0.68	0.639	1
g7997.t1|HNMT-TETNG	-0.0650307	0.24	0.267	1
g22916.t1|GDF6A-DANRE	0.00432908	0.017	0.009	1
g7643.t1|ECT-ACRMI	0.0245007	0.005	0.001	1
g9691.t1|ATG13-DROME	0.0404671	0.127	0.105	1
g29446.t1|NFYA-MOUSE	0.0131749	0.141	0.117	1
g19257.t1|DZIP1-DANRE	-0.000720291	0.028	0.04	1
g13137.t1|ANFY1-MOUSE	0.0147263	0.414	0.372	1
g4955.t2|NCKX5-DANRE	0.0192934	0.263	0.231	1
g18772.t1|TM151-CAEBR	0.0084237	0.013	0.006	1
g18411.t1|QCR2-BOVIN	-0.00533697	0.159	0.133	1
g24807.t1|CEP78-HUMAN	-0.0326027	0.025	0.035	1
g31338.t1|SYT7-HUMAN	-0.0243921	0.278	0.24	1
g25240.t1|MPI-RAT	0.0381801	0.187	0.16	1
g5530.t1|DNJC3-BOVIN	-0.123222	0.131	0.149	1
g18711.t1|CPEB4-MOUSE	0.00830439	0.045	0.032	1
g15331.t1|FBX4-BOVIN	0.000133675	0.034	0.022	1
g10391.t1|NICA-MOUSE	0.0115196	0.053	0.038	1
g6395.t1|PX11B-PONAB	0.0226693	0.148	0.124	1
g20534.t1|PFD4-HUMAN	0.0642385	0.316	0.283	1
g268.t1|IYD1-PONAB	-0.0338853	0.137	0.163	1
g19216.t1|EDEM3-XENLA	0.00335	0.148	0.123	1
g27545.t1|TATD1-BOVIN	0.0437498	0.238	0.208	1
g25647.t2|TLE4-MOUSE	-0.0962388	0.347	0.362	1
g28849.t1|TBA1D-BOVIN	0.0364073	0.67	0.659	1
g12685.t2|MFS12-MOUSE	0.0107674	0.012	0.005	1
g31047.t1|UVR8-ARATH	-0.000465485	0.037	0.025	1
g19377.t1|STK31-MOUSE	-0.00737157	0.006	0.012	1
g32759.t1|NPHP3-MOUSE	-0.0194417	0.038	0.051	1
g8636.t1|ATIF1-PONAB	0.0483142	0.712	0.682	1
g19300.t1|CALM-STYLE	-0.0027664	0.062	0.046	1
g7936.t1|ADA1A-ORYLA	-0.00709122	0.075	0.094	1
g7131.t1|AN36B-HUMAN	0.0159308	0.011	0.004	1
g25032.t1|CD36-MOUSE	0.0114971	0.006	0.002	1
g2738.t1|SMHD1-MOUSE	-0.0155136	0.016	0.025	1
g29442.t1|AGGF1-MOUSE	0.0173855	0.185	0.159	1
g32489.t1|DRD1L-TAKRU	0.00943701	0.003	0	1
g25248.t1|CAH2-TRIHK	0.00858321	0.003	0	1
g28237.t1|NMDZ1-RAT	0.00596514	0.003	0	1
g13689.t1|BOLL-HUMAN	0.0054403	0.003	0	1
g23832.t1|PCR4-ARATH	0.00517763	0.003	0	1
g2275.t1|SAAR2-ACRMI	-0.000962969	0.141	0.117	1
g3351.t1|MD13L-HUMAN	0.0209372	0.135	0.113	1
g15490.t1|METL2-MOUSE	0.00432704	0.045	0.032	1
g8476.t1|ZN729-HUMAN	-0.0108597	0.131	0.108	1
g14239.t2|DUS9-HUMAN	-0.0031358	0.001	0.004	1
g23939.t1|PPSB-BACSU	-0.018242	0.048	0.063	1
g9958.t1|HAUS3-HUMAN	0.017381	0.051	0.037	1
g30790.t1|KMT5A-MOUSE	0.0077633	0.008	0.003	1
g29385.t1|MBIP1-HUMAN	-0.0367282	0.02	0.029	1
g18492.t1|ANKS3-HUMAN	-0.0900432	0.139	0.157	1
g20339.t1|NR1BA-DANRE	0.0270155	0.018	0.01	1
g14987.t1|SBP1-XENTR	0.00936518	0.043	0.03	1
g9002.t1|PPRC1-MOUSE	-0.0626894	0.121	0.142	1
g11048.t1|NK2R-CAVPO	-0.00715075	0.024	0.014	1
g28482.t1|KDM4A-MOUSE	0.00847661	0.031	0.02	1
g33076.t1|TBA1C-MOUSE	-0.118294	0.153	0.174	1
g22633.t1|IVD-CAEEL	0.0165393	0.021	0.012	1
g6739.t1|RBM3-RAT	0.0202044	0.158	0.133	1
g28075.t1|EMP1-PONAB	-0.171458	0.342	0.348	1
g7631.t1|SRS12-HUMAN	0.0336857	0.107	0.088	1
g19868.t1|TBCD4-MOUSE	0.0697379	0.133	0.113	1
g8266.t1|ACSM3-MOUSE	0.00432434	0.005	0.001	1
g30554.t1|ESIB-ECOL6	0.0719339	0.162	0.141	1
g23578.t1|PHRF1-MOUSE	0.00031245	0.005	0.001	1
g6301.t1|RASEF-XENTR	-0.000435202	0.005	0.001	1
g15882.t1|UN13B-MOUSE	-0.0944429	0.18	0.198	1
g3731.t1|TULP3-HUMAN	0.0433936	0.304	0.271	1
g30238.t1|IFT88-MOUSE	0.00117587	0.021	0.012	1
g11058.t1|C9MT-KOMPG	-0.110819	0.309	0.323	1
g23419.t1|KANL2-PONAB	0.0262064	0.138	0.116	1
g31412.t1|COCA1-CHICK	-0.0174685	0.111	0.089	1
g1374.t1|GGT1-HUMAN	0.0108282	0.035	0.024	1
g14854.t1|S40A1-DANRE	0.0185614	0.11	0.089	1
g26455.t1|TOIP1-RAT	0.0677584	0.17	0.15	1
g1874.t1|BCAR1-HUMAN	-0.0800478	0.454	0.463	1
g28776.t2|PK1L2-HUMAN	0.0049443	0.014	0.007	1
g5156.t1|LMNA-RAT	-0.113256	0.506	0.513	1
g16557.t1|VAB15-CAEEL	-0.0122276	0.005	0.011	1
g9169.t1|CAH2-TRIHK	0.0178317	0.031	0.02	1
g32002.t1|PSMD6-DROME	0.0205479	0.473	0.436	1
g30288.t1|MENG-STAS1	0.0158228	0.006	0.002	1
g15826.t1|MK06-HUMAN	-0.131345	0.323	0.341	1
g19153.t1|TXD12-EPICO	-0.03649	0.016	0.025	1
g21597.t1|PIMT-DANRE	-0.0460804	0.109	0.127	1
g29786.t1|DJC10-HUMAN	-0.112896	0.144	0.16	1
g19927.t1|APOA4-HUMAN	0.0114392	0.008	0.003	1
g25906.t1|PDE8B-HUMAN	-0.0583542	0.122	0.141	1
g5865.t1|ARF12-CAEBR	-0.0372239	0.952	0.942	1
g20766.t1|GAPR1-HUMAN	0.010646	0.013	0.006	1
g536.t1|ACATN-RAT	-0.0379318	0.069	0.084	1
g18817.t1|RAB3C-HUMAN	0.0215071	0.043	0.031	1
g12322.t1|CD9-MOUSE	-0.0151492	0.073	0.089	1
g17004.t1|KPCA-RAT	0.00252284	0.354	0.315	1
g6648.t1|B3GN4-HUMAN	0.00673248	0.003	0	1
g19869.t1|AGRB3-HUMAN	0.00496603	0.003	0	1
g5644.t1|GRM1-HUMAN	0.0048024	0.003	0	1
g9617.t1|RTBS-DROME	0.00460488	0.003	0	1
g9734.t2|UBA6-HUMAN	0.00398578	0.003	0	1
g19320.t1|NPY4R-MOUSE	0.00201192	0.003	0	1
g6318.t1|AT1A-HYDVU	0.0013584	0.051	0.038	1
g769.t1|MED14-HUMAN	0.0224717	0.118	0.097	1
g10853.t1|RNC-MOUSE	0.0243161	0.123	0.102	1
g17940.t1|MYPH-ECHGR	-0.214709	0.433	0.421	1
g31739.t1|SDCG3-BOVIN	0.00902227	0.027	0.018	1
g22311.t1|ALG12-DROME	0.0163154	0.107	0.088	1
g32388.t2|CNR11-MAIZE	-0.0173015	0.012	0.019	1
g20913.t1|DEN2C-HUMAN	0.00872015	0.028	0.019	1
g17639.t1|CLPT1-HUMAN	-4.56347e-05	0.289	0.258	1
g18546.t1|TRF6A-XENLA	-0.00919204	0.012	0.019	1
g1375.t1|GCSP-HUMAN	-0.0361143	0.369	0.374	1
g22573.t1|KLC4-BOVIN	0.023215	0.017	0.01	1
g5120.t1|R213A-DANRE	0.010147	0.004	0.001	1
g10182.t1|CAN7-MOUSE	0.0253937	0.28	0.25	1
g27471.t1|SUCB2-MOUSE	0.00986035	0.025	0.016	1
g11270.t1|NXF1-COTJA	-0.108945	0.254	0.27	1
g24047.t1|B3GN4-HUMAN	0.0915163	0.149	0.13	1
g13544.t2|SDCB1-HUMAN	0.0262116	0.624	0.585	1
g29153.t1|SLD5-MOUSE	0.0191942	0.179	0.156	1
g12939.t1|PRDM6-MOUSE	0.00977846	0.02	0.012	1
g30361.t1|MTX2-MOUSE	0.0219838	0.062	0.048	1
g11470.t1|ZSC31-HUMAN	0.10354	0.138	0.121	1
g15139.t1|ENPP4-MOUSE	0.0159461	0.009	0.004	1
g6022.t1|SINL2-ARATH	0.00328372	0.015	0.008	1
g2851.t1|STX5-DROME	-0.0118187	0.339	0.306	1
g24350.t1|DRG1-XENLA	-0.00519636	0.451	0.413	1
g19135.t1|TM128-MOUSE	0.00359335	0.006	0.002	1
g19340.t1|SMG9-SALSA	0.00823266	0.04	0.028	1
g5810.t1|DNJB5-BOVIN	0.0220062	0.335	0.304	1
g32332.t1|LOL2B-DANRE	-0.00439037	0.033	0.044	1
g3279.t1|CASP2-CHICK	0.0376991	0.499	0.467	1
g9541.t1|BCS1-XENLA	-0.0194341	0.024	0.033	1
g22613.t1|TM136-BOVIN	0.0225195	0.013	0.007	1
g28025.t1|TAF9B-PONAB	0.0375325	0.08	0.065	1
g28042.t1|ARHB-XENLA	0.159439	0.189	0.173	1
g23544.t2|KDM2A-XENTR	-0.00734563	0.005	0.01	1
g27611.t1|ZSCA2-MOUSE	0.0142717	0.125	0.105	1
g25225.t1|INT4-XENLA	0.00157517	0.08	0.065	1
g26120.t1|CDS1-MOUSE	0.00706904	0.02	0.012	1
g15033.t1|AK17A-HUMAN	-0.00982048	0.386	0.345	1
g16704.t1|IDH3A-DROME	0.0215906	0.128	0.109	1
g25762.t1|A4-CAEEL	0.0816882	0.883	0.885	1
g27078.t1|TIAM1-MOUSE	-0.051817	0.06	0.074	1
g15054.t1|COQ5-DROME	0.0110423	0.206	0.18	1
g11528.t1|CO1A2-RAT	0.357302	0.404	0.376	1
g17604.t1|TRPA1-HUMAN	-0.00863971	0.139	0.118	1
g17742.t1|NCAN-PANTR	0.00457625	0.002	0	1
g23458.t1|CDC16-MOUSE	0.00448529	0.002	0	1
g6062.t1|SVEP1-RAT	0.00261257	0.002	0	1
g570.t1|MSH2-HUMAN	0.0240191	0.065	0.051	1
g33094.t1|BRE-BRAFL	0.00832465	0.026	0.017	1
g16024.t1|ZMYM1-HUMAN	-0.0109637	0.006	0.011	1
g14494.t3|KSR2-HUMAN	0.0577726	0.112	0.096	1
g19310.t1|HYUA-PSESN	0.020284	0.041	0.03	1
g30885.t1|DNJC8-HUMAN	-0.0179663	0.31	0.277	1
g4845.t1|IP6K3-MOUSE	0.0206707	0.039	0.028	1
g31028.t2|ZMIZ2-MOUSE	-0.0516019	0.33	0.351	1
g30764.t1|CEL3B-MOUSE	0.115505	0.125	0.107	1
g16688.t1|MBD2-MOUSE	0.0147617	0.161	0.138	1
g30722.t1|SLB-PROJR	0.00958095	0.01	0.004	1
g877.t1|CDK1-CARAU	-0.0498717	0.175	0.194	1
g20476.t1|MEGF6-RAT	0.00828174	0.01	0.004	1
g2660.t1|PRRT1-RAT	0.00929449	0.004	0.001	1
g3747.t2|VMPA3-LOXIN	0.0152801	0.004	0.001	1
g29761.t1|BIGA-SALTY	-0.0132506	0.009	0.014	1
g7044.t1|SYFM-MOUSE	0.00876024	0.057	0.044	1
g3108.t1|CCD39-XENTR	-0.0059862	0.007	0.012	1
g3408.t1|TORSO-BOMMO	-0.00588428	0.009	0.015	1
g24396.t1|ZMYM5-MACFA	-0.000321614	0	0.001	1
g28610.t1|OPN3-HUMAN	-0.000454612	0	0.001	1
g22966.t1|RTJK-DROME	-0.000469903	0	0.001	1
g1017.t1|FP-ACRMI	-0.0012208	0	0.001	1
g12482.t1|AMPE-RAT	-0.00122893	0	0.001	1
g13591.t1|PGPI-RAT	-0.00145623	0	0.001	1
g5617.t1|AEBP1-HUMAN	-0.00322624	0	0.001	1
g28597.t2|GGHA-DICDI	-0.00691755	0	0.001	1
g15962.t1|CHIC2-HUMAN	0.00882217	0.145	0.123	1
g31170.t2|LTBP4-MOUSE	-0.000862014	0.001	0.003	1
g12125.t1|CALM-HALOK	-0.00350775	0.001	0.003	1
g25238.t1|MAEL-XENTR	0.0460433	0.277	0.249	1
g11276.t1|ABCB9-HUMAN	0.015868	0.025	0.017	1
g15706.t1|ZN284-HUMAN	7.1424e-05	0.056	0.043	1
g15440.t1|CP1A2-MOUSE	0.0220448	0.02	0.012	1
g11145.t1|GLUCL-DROME	-0.119123	0.134	0.149	1
g4045.t1|FAZ1-TRYB9	-0.0892795	0.375	0.385	1
g14109.t1|COEA1-MOUSE	0.0542043	0.04	0.029	1
g5789.t1|HACD3-DANRE	0.00609454	0.067	0.053	1
g16282.t1|CA158-BOVIN	-0.0813883	0.073	0.086	1
g1743.t1|LAMA4-HUMAN	0.100279	0.137	0.122	1
g15062.t1|FMAR-DROME	0.0897397	0.109	0.094	1
g27770.t1|POGK-HUMAN	0.073319	0.064	0.052	1
g22616.t1|STB5L-MOUSE	-0.0786929	0.254	0.272	1
g19512.t1|RIMS2-RAT	0.0119602	0.028	0.019	1
g31523.t1|SBNO1-HUMAN	0.0146309	0.122	0.104	1
g3249.t1|TEAD1-MOUSE	-0.03613	0.003	0.007	1
g23656.t1|SPAT4-HUMAN	0.0205382	0.028	0.019	1
g947.t2|FGF12-RAT	-0.00665305	0.003	0.007	1
g9423.t1|NIPLA-DANRE	0.00413386	0.007	0.003	1
g20345.t1|SYK-MOUSE	0.0419949	0.375	0.348	1
g26363.t1|KPTN-HUMAN	0.00612921	0.013	0.007	1
g10696.t1|VPS53-CHICK	0.00685239	0.203	0.226	1
g12215.t1|G6PT1-HUMAN	0.0146858	0.036	0.027	1
g5731.t1|E2F7-BOVIN	0.0531622	0.197	0.176	1
g11602.t2|GAPD1-MOUSE	-0.00668579	0.002	0.004	1
g11873.t1|SERIC-NEMVE	-0.00845228	0.002	0.004	1
g19746.t1|AL3A1-MOUSE	-0.0121327	0.243	0.213	1
g21086.t1|NCAH-DROME	-0.0394973	0.839	0.793	1
g14670.t1|1433Z-DROME	-0.0186666	0.998	0.998	1
g6109.t1|ENTP7-MOUSE	-0.0269507	0.014	0.021	1
g22886.t1|APX1-HYDVD	-0.0041799	0.002	0.004	1
g32440.t1|PRS6B-MACFA	-0.00645911	0.386	0.347	1
g21754.t1|WAC-HUMAN	0.0115823	0.266	0.239	1
g23947.t1|YHD6-SCHPO	0.0276033	0.086	0.071	1
g19913.t1|MA2A1-RAT	-0.00680489	0.203	0.178	1
g29847.t1|BACD3-HUMAN	0.0382041	0.42	0.384	1
g23256.t1|MFSD8-MOUSE	0.00666928	0.045	0.034	1
g19446.t1|DNJC7-MOUSE	0.0175823	0.4	0.368	1
g3220.t1|COMA-CONMA	0.034699	0.028	0.019	1
g5150.t1|AKP13-HUMAN	0.0492259	0.096	0.081	1
g26865.t1|TRPA1-DROME	-0.00896486	0.094	0.077	1
g27583.t1|AT1A-HYDVU	0.00705423	0.009	0.004	1
g7013.t1|TCPQ-CHICK	0.0162215	0.083	0.067	1
g32710.t1|TMM62-HUMAN	-0.00809483	0.042	0.031	1
g10301.t1|MA2B1-CAVPO	-0.0807629	0.242	0.26	1
g24534.t1|LIN41-MOUSE	-0.0255442	0.286	0.248	1
g31893.t1|NSUN2-XENTR	-0.0261672	0.105	0.121	1
g17730.t1|TM86A-HUMAN	-0.0362964	0.065	0.078	1
g24140.t1|NOL12-BOVIN	-0.0053118	0.098	0.081	1
g5099.t1|CHADL-MOUSE	-0.0260682	0.011	0.017	1
g21264.t1|BAT1-RABIT	0.00667442	0.002	0	1
g27629.t1|THIO-GEOCY	0.00486828	0.002	0	1
g25770.t1|NAS4-CAEEL	0.00314883	0.002	0	1
g16978.t1|ADRB1-XENLA	0.00144422	0.002	0	1
g1473.t1|GDF8-TAUDE	-0.000438292	0.005	0.009	1
g22449.t1|RBNS5-MOUSE	0.0118549	0.101	0.085	1
g2978.t1|NAS15-CAEEL	0.0424049	0.034	0.025	1
g28970.t1|TECR-ARATH	0.0230829	0.023	0.015	1
g4112.t1|KLC1-RAT	-0.0124385	0.195	0.171	1
g7675.t1|FOXK1-MOUSE	-0.0499888	0.064	0.076	1
g21165.t1|AIS-PSESP	0.00510891	0.047	0.036	1
g6590.t1|DAND5-MOUSE	-0.0141454	0.005	0.01	1
g31057.t1|RPA2-RAT	0.00249933	0.013	0.007	1
g27859.t1|SCUB3-MOUSE	-0.00312043	0.049	0.061	1
g10457.t1|S17AB-XENLA	0.00653305	0.004	0.001	1
g32364.t1|KCNC1-HUMAN	0.00966491	0.004	0.001	1
g30477.t1|MFSD6-PIG	-0.00738739	0	0.002	1
g33763.t2|KIN17-MOUSE	-0.00173717	0	0.002	1
g23158.t1|BRD8-MOUSE	-0.00721345	0	0.002	1
g27165.t1|ING3-MOUSE	-0.0540825	0.059	0.071	1
g30681.t1|CAC1M-MUSDO	-5.60968e-05	0	0.002	1
g31011.t1|KCNC1-HUMAN	-0.00126603	0	0.002	1
g27644.t1|GFI1B-CHICK	0.00733795	0.01	0.005	1
g31900.t1|SRCH-HUMAN	0.0109017	0.01	0.005	1
g30862.t1|GRK5-BOVIN	0.0380778	0.418	0.387	1
g23734.t1|RSH4A-MOUSE	0.0463968	0.066	0.054	1
g19826.t1|PIEZ2-MOUSE	0.0103781	0.017	0.011	1
g22058.t1|FBP1-STRPU	0.00287483	0.006	0.003	1
g27330.t1|GLNA-PANAR	-0.0609851	0.082	0.066	1
g7036.t1|STR6L-MOUSE	-0.0138298	0.023	0.015	1
g20685.t1|PRY1-YEAST	0.0596015	0.034	0.025	1
g30630.t1|BP10-PARLI	-0.000398043	0.023	0.015	1
g5961.t1|OCT1-CAEEL	0.0306868	0.039	0.029	1
g23075.t1|ROA2-PONAB	-0.0952956	0.407	0.415	1
g21684.t1|PAIP1-MOUSE	0.0206476	0.088	0.074	1
g22119.t1|XYLT1-PANTR	-0.00852026	0.082	0.067	1
g1823.t1|IR3IP-XENLA	-0.00156703	0.222	0.197	1
g7634.t1|PKHM3-XENLA	0.00552367	0.024	0.016	1
g8497.t1|CO1A2-LITCT	0.190944	0.468	0.424	1
g22578.t1|SENP8-HUMAN	-0.0192108	0.051	0.062	1
g18415.t1|PZRN3-HUMAN	0.0394911	0.092	0.077	1
g22113.t1|M3K3-HUMAN	0.0146502	0.085	0.07	1
g23607.t1|SERB-MOUSE	0.0333518	0.08	0.066	1
g9222.t1|NOP2-MOUSE	-0.0616371	0.289	0.306	1
g9187.t1|UBC-HUMAN	-0.0247584	0.916	0.911	1
g14792.t1|GPHR-SALSA	0.00735242	0.075	0.061	1
g2327.t1|ERP44-MOUSE	-0.0981078	0.558	0.56	1
g20062.t1|CAH6-MOUSE	0.00687551	0.009	0.004	1
g12992.t1|CHSTB-RAT	-0.00224238	0.011	0.006	1
g2279.t1|YRD6-CAEEL	-0.00227295	0.009	0.004	1
g10307.t1|MANA3-ARATH	0.0267352	0.028	0.02	1
g33780.t1|MTSSL-HUMAN	0.00865756	0.041	0.031	1
g8377.t1|BUB3-MOUSE	-0.0152934	0.091	0.075	1
g27080.t1|S35F1-MOUSE	-0.103695	0.081	0.093	1
g32363.t1|TCPR2-HUMAN	-0.024742	0.207	0.181	1
g4633.t1|WDR26-DANRE	0.0106631	0.049	0.038	1
g27135.t1|CKAP5-HUMAN	0.00634243	0.148	0.128	1
g32891.t1|EHD1-RAT	-0.133843	0.443	0.446	1
g17812.t1|FCL-CAEEL	0.0170999	0.122	0.105	1
g4288.t1|AKTIP-NEMVE	0.019285	0.113	0.097	1
g10351.t1|DKK3-MOUSE	0.0138544	0.012	0.007	1
g6656.t1|H32-CICIN	-0.0103833	0.075	0.062	1
g3301.t1|CLU-MOUSE	-0.0375835	0.433	0.465	1
g13519.t1|RNOY-CRAGI	0.0506413	0.09	0.077	1
g23901.t1|LAC2-BOTFU	0.191666	0.361	0.352	1
g19503.t1|CLK2-MOUSE	-0.0391342	0.412	0.427	1
g2906.t1|S39AC-HUMAN	0.0248772	0.038	0.029	1
g15732.t1|BETS-RHIML	0.0130782	0.013	0.008	1
g27358.t2|DYRK4-HUMAN	0.0192686	0.018	0.012	1
g17804.t1|VTA1-BOVIN	0.0222309	0.213	0.191	1
g15506.t1|MTF2-PONAB	0.00924777	0.013	0.008	1
g10166.t1|COA-ACRMI	0.113112	0.285	0.316	1
g6132.t1|CP17A-RANDY	0.103208	0.133	0.12	1
g29960.t1|DGKD-HUMAN	0.00770377	0.032	0.024	1
g24011.t1|CNTP2-MOUSE	0.000335314	0.001	0.004	1
g20513.t1|SCPDL-RAT	0.00346639	0.08	0.066	1
g13166.t1|GGH-MOUSE	-0.00982272	0.004	0.007	1
g18955.t1|TI16A-XENLA	-0.0265341	0.232	0.206	1
g25394.t1|AB27G-ARATH	-0.00436239	0.004	0.007	1
g15023.t1|HIP1R-HUMAN	-0.00240176	0.117	0.1	1
g30300.t1|MCPI-MELCP	-0.000721066	0.179	0.198	1
g32699.t1|DIEXF-MOUSE	0.0234147	0.065	0.053	1
g32271.t1|KCNH6-RAT	-0.0267681	0.008	0.012	1
g699.t1|A16L1-MOUSE	0.0104751	0.003	0.001	1
g3548.t1|OPSP-ICTPU	0.00389295	0.002	0	1
g31698.t1|TM175-MOUSE	0.00352617	0.002	0	1
g14105.t2|HMCN1-MOUSE	0.00308273	0.002	0	1
g15389.t1|CALM5-ARATH	0.00307863	0.002	0	1
g29101.t1|FUT8-PIG	0.00292179	0.002	0	1
g14703.t1|GFI1B-MOUSE	0.0026649	0.002	0	1
g6172.t2|CH037-DANRE	0.00236451	0.002	0	1
g11929.t3|FPPS-BOVIN	0.0023187	0.002	0	1
g10511.t1|F149A-MOUSE	0.00179656	0.002	0	1
g27710.t1|SMC4-ARATH	0.00448738	0.006	0.003	1
g3389.t1|NAS13-CAEEL	0.0105367	0.003	0.001	1
g11611.t3|AGRG6-DANRE	0.00543813	0.006	0.003	1
g16907.t1|MLRP2-ACRMI	-0.00774447	0.039	0.049	1
g2013.t1|LPHN-DROAN	0.0141631	0.061	0.05	1
g24996.t1|MYOTI-HUMAN	0.00465889	0.063	0.051	1
g618.t1|ROA1-XENLA	0.00877106	0.589	0.547	1
g22734.t1|LAMP1-HUMAN	0.0975495	0.221	0.208	1
g30568.t1|PPIP1-HUMAN	0.0457479	0.089	0.076	1
g5465.t1|CTX1-CHIFL	0.0109399	0.022	0.015	1
g28376.t1|CATIP-DANRE	-0.0482417	0.109	0.121	1
g8690.t1|CCNT2-MOUSE	0.0130136	0.102	0.088	1
g7515.t1|CY250-MOUSE	0.00545505	0.009	0.004	1
g4733.t1|NPHP3-HUMAN	0.0137287	0.024	0.017	1
g19766.t1|ALKB5-MOUSE	-0.0774502	0.265	0.28	1
g19973.t1|HE-HEMPU	0.00455243	0.005	0.002	1
g20769.t1|IRX6-HUMAN	-0.0846117	0.448	0.452	1
g29449.t1|MP20-DROME	0.0449669	0.472	0.419	1
g21755.t1|RXRA-XENLA	0.00622787	0.009	0.004	1
g29219.t1|TCB1-CAEBR	0.00522343	0.009	0.004	1
g22784.t1|SC5A8-MOUSE	-0.00760401	0.006	0.011	1
g15863.t1|OPN3-MOUSE	-0.00975748	0.006	0.01	1
g10588.t1|3BP5H-DROME	-0.0186886	0.069	0.057	1
g8098.t1|GLOD4-RAT	-0.00905369	0.077	0.089	1
g29167.t1|NFXL1-XENLA	0.0338683	0.084	0.071	1
g2011.t2|PKHG5-HUMAN	-0.01946	0.013	0.019	1
g9893.t1|AGRE2-MACMU	0.00986182	0.012	0.007	1
g1748.t1|PROP-CAVPO	-0.0398189	0.181	0.156	1
g19741.t1|AR2BP-PONAB	0.00691974	0.028	0.02	1
g21006.t1|ASPG-DIRIM	-0.0515483	0.109	0.091	1
g8736.t1|ECD-HUMAN	-0.0137333	0.02	0.027	1
g6738.t1|UTP4-MOUSE	-0.0411871	0.312	0.326	1
g21926.t1|CS012-XENTR	0.0341294	0.054	0.043	1
g14025.t1|NPL4-MOUSE	-0.0137923	0.162	0.143	1
g22145.t1|HID1-HUMAN	0.0150212	0.03	0.022	1
g14521.t1|PK1L2-MOUSE	-0.00219603	0.025	0.018	1
g32310.t1|SGPP2-MOUSE	-0.00371706	0.147	0.128	1
g19596.t1|CHIN-HUMAN	-0.0115621	0.216	0.236	1
g15943.t1|MEIOC-MOUSE	0.00525193	0.017	0.012	1
g24096.t1|NPHP3-XENLA	0.0296153	0.037	0.028	1
g24993.t1|FRRS1-MOUSE	-0.0164141	0.026	0.034	1
g12762.t1|SCFD2-MOUSE	0.0233483	0.033	0.025	1
g33765.t1|GRM3-MOUSE	0.00899114	0.01	0.005	1
g6351.t1|KIF17-HUMAN	0.0258089	0.293	0.267	1
g28490.t1|WDR12-SALSA	-0.0309201	0.219	0.24	1
g944.t1|ZFY26-BOVIN	0.0160511	0.036	0.027	1
g24378.t1|GRM8-HUMAN	0.00301762	0.007	0.004	1
g24548.t1|JMJD6-HYDVU	-0.00706062	0.055	0.044	1
g7159.t1|RAB20-HUMAN	0.0726457	0.099	0.088	1
g15226.t1|ARX-RAT	0.0013844	0.007	0.004	1
g6839.t1|HSP70-HYDVU	0.00976328	0.518	0.483	1
g30242.t1|MAOX-RAT	-0.00127393	0.146	0.129	1
g5225.t1|ADRB2-TSCTR	0.0117927	0.026	0.019	1
g16906.t1|MLRP2-ACRMI	-0.0091225	0.055	0.066	1
g28287.t1|GUF1-TRIAD	-0.00418145	0.043	0.034	1
g8917.t1|FGF2-CHICK	-0.0025883	0.12	0.105	1
g19290.t1|GRM1B-HUMAN	-0.0223096	0.386	0.354	1
g5409.t1|SGTB-RAT	0.00529706	0.03	0.022	1
g8157.t1|SF01-MOUSE	-0.0608345	0.312	0.325	1
g8232.t1|USPAL-ARATH	0.0119903	0.006	0.003	1
g26583.t2|TENS1-HUMAN	0.0132036	0.008	0.004	1
g26815.t1|SIX6-HUMAN	0.035667	0.15	0.134	1
g19737.t1|MFNA-METPE	0.00156487	0.008	0.004	1
g21760.t1|NAS4-CAEEL	0.0312231	0.018	0.012	1
g12785.t1|NAT-MYCTU	0.0145089	0.022	0.016	1
g2009.t1|KGUA-YEAST	0.00384294	0.008	0.004	1
g387.t1|GTDC1-DROME	-0.0270214	0.02	0.027	1
g17051.t1|RD23B-HUMAN	-0.0762784	0.617	0.605	1
g26924.t1|FAT4-MOUSE	-0.0109344	0.082	0.095	1
g9519.t1|FEZF2-DANRE	-0.00449105	0.003	0.005	1
g8860.t2|SMAG1-XENTR	-0.00257643	0.003	0.005	1
g18914.t1|RM23-RAT	0.0162544	0.027	0.02	1
g26856.t1|RRP12-HUMAN	-0.0184788	0.036	0.044	1
g6004.t1|SUP9-CAEEL	0.0433702	0.047	0.038	1
g15881.t1|N2F1A-DANRE	0.00442805	0.003	0.001	1
g28061.t1|CTR1-RAT	0.0152534	0.004	0.002	1
g14575.t1|FAN-HUMAN	-0.000916429	0.021	0.027	1
g30263.t1|AGRA3-DANRE	-0.0034998	0.021	0.015	1
g4766.t1|LRC23-MOUSE	-0.0119396	0.019	0.026	1
g8980.t1|TBC24-XENLA	0.0117723	0.101	0.088	1
g21238.t1|C2D2A-HUMAN	-0.00895814	0.036	0.028	1
g31271.t1|SNX24-BOVIN	-0.0139933	0.019	0.013	1
g5131.t1|G3ST1-MOUSE	-0.00541275	0.026	0.033	1
g3119.t1|SAE2-HUMAN	0.0167823	0.183	0.167	1
g8081.t1|S13A5-HUMAN	0.090283	0.16	0.147	1
g28684.t1|MYC-TADBR	0.00524036	0.013	0.008	1
g19134.t1|GAPR1-HUMAN	0.00608094	0.001	0	1
g33112.t1|SNX9-MOUSE	0.00583627	0.001	0	1
g19107.t2|FHL3-HUMAN	0.0049078	0.001	0	1
g30533.t1|SHKB1-MOUSE	0.00233363	0.001	0	1
g13528.t1|HM10-CAEEL	0.00233164	0.001	0	1
g3685.t1|CD97-BOVIN	0.00174791	0.001	0	1
g12545.t1|ODB2-CAEEL	0.00104469	0.001	0	1
g15557.t1|AGRG2-HUMAN	0.000998282	0.001	0	1
g31738.t1|RBM41-DANRE	0.00476857	0.014	0.009	1
g5395.t1|MAX-RAT	-0.00696565	0.007	0.011	1
g1783.t1|GP153-MOUSE	0.00548585	0.009	0.005	1
g22164.t1|COX10-HUMAN	-0.00501018	0.214	0.192	1
g27576.t1|HLYS-HYDVU	-0.00745528	0.077	0.066	1
g24355.t1|EST1A-HUMAN	-0.00135111	0.007	0.011	1
g26572.t1|LAC24-ORYSJ	-0.0139923	0.004	0.007	1
g12458.t1|PLPL2-RAT	0.0019203	0.036	0.028	1
g10987.t1|RET-MOUSE	0.00821675	0.015	0.01	1
g17278.t1|CL16A-MOUSE	-0.00758766	0.105	0.09	1
g25742.t1|LMOD3-DANRE	0.037285	0.148	0.133	1
g24804.t1|HYI-DANRE	0.123786	0.268	0.252	1
g1928.t1|PTN13-MOUSE	-0.00184651	0.001	0.003	1
g31254.t1|CD38-MACFA	0.00914742	0.01	0.006	1
g31399.t1|PAX6-DANRE	-0.000370703	0.001	0.003	1
g24377.t1|MCPI-MELCP	0.157796	0.115	0.106	1
g8059.t1|TMCC3-HUMAN	0.00127224	0.046	0.037	1
g21607.t1|RPE-HUMAN	-0.0301435	0.096	0.082	1
g21563.t1|ACSL4-MOUSE	0.010174	0.389	0.356	1
g567.t1|KCNA1-RAT	-0.0442663	0.02	0.027	1
g31696.t1|ATP9B-BOVIN	-0.00864488	0.191	0.171	1
g7825.t1|ELP5-DANRE	-0.0171116	0.041	0.033	1
g18244.t1|TIM-RAT	-0.00271749	0.016	0.011	1
g15913.t1|KCNK9-XENLA	-0.0257083	0.014	0.019	1
g15465.t1|RTKN-HUMAN	0.0197554	0.088	0.076	1
g28960.t1|NRF6-CAEEL	-0.00683319	0.06	0.07	1
g13667.t1|TDR12-HUMAN	-0.0301842	0.167	0.18	1
g11221.t1|CHIT1-HUMAN	0.0319237	0.049	0.04	1
g1967.t2|CCD65-BOVIN	0.0102273	0.008	0.004	1
g2718.t1|PPM1D-MOUSE	0.0273427	0.084	0.073	1
g16408.t1|LTBP1-HUMAN	0.00581287	0.005	0.003	1
g2480.t1|MAP11-DANRE	-0.011021	0.176	0.158	1
g2291.t1|NALD2-MOUSE	-0.0177958	0.136	0.152	1
g24277.t1|ASTA-ASTAS	-0.00218267	0.02	0.027	1
g12434.t1|ELK1-RAT	0.00326688	0.005	0.003	1
g18430.t1|LRRK2-HUMAN	-0.0120704	0.028	0.035	1
g25416.t1|PLOD1-CHICK	0.0189465	0.232	0.255	1
[truncated: 835 more rows]

## Sheet: F0H0
Peak ID	log2FC	log2CPM	Nearest Gene ID	Peak Contig ID	Peak Start Coordinate	Peak End Coordinate	SwissProt Hit ID	SwissProt Hit Description	False Discovery Rate
10	0.0312804	3.12956	g5778	Sc4wPfr_1	64756	65385			0.957979
1000	-0.046406	5.23111	g13509	Sc4wPfr_1010	153815	154267	sp|Q5E951|TBCB_BOVIN	Binds to alpha-tubulin folding intermediates after their interaction with cytosolic chaperonin in the pathway leading from newly synthesized tubulin to properly folded heterodimer. Involved in regulation of tubulin heterodimer dissociation. May function as a negative regulator of axonal growth.	0.86601
10001	-0.158319	4.31695	g2837	Sc4wPfr_121	596105	598469	sp|P10090|WHITE_DROME	Part of a membrane-spanning permease system necessary for the transport of pigment precursors into pigment cells responsible for eye color. White dimerize with brown for the transport of guanine. Scarlet and white complex transports a metabolic intermediate (such as 3-hydroxy kynurenine) from the cytoplasm into the pigment granules.	0.444765
100010	-0.0760383	4.48492	g31453	Sc4wPfr_856	868226	870513	sp|Q7ZXV8|ZN207_XENLA	Kinetochore- and microtubule-binding protein that plays a key role in spindle assembly. Znf207/BuGZ is mainly composed of disordered low-complexity regions and undergoes phase transition or coacervation to form temperature-dependent liquid droplets. Coacervation promotes microtubule bundling and concentrates tubulin, promoting microtubule polymerization and assembly of spindle and spindle matrix …	0.781942
100013	0.179575	4.78212	g31453	Sc4wPfr_856	903973	904628	sp|Q7ZXV8|ZN207_XENLA	Kinetochore- and microtubule-binding protein that plays a key role in spindle assembly. Znf207/BuGZ is mainly composed of disordered low-complexity regions and undergoes phase transition or coacervation to form temperature-dependent liquid droplets. Coacervation promotes microtubule bundling and concentrates tubulin, promoting microtubule polymerization and assembly of spindle and spindle matrix …	0.277388
100014	0.0243135	4.1578	g31456	Sc4wPfr_856	915738	916521			0.952848
100020	0.187572	4.68631	g31460	Sc4wPfr_856	949030	950021	sp|Q7Z494|NPHP3_HUMAN	Required for normal ciliary development and function. Inhibits disheveled-1-induced canonical Wnt-signaling activity and may also play a role in the control of non-canonical Wnt signaling which regulates planar cell polarity. Probably acts as a molecular switch between different Wnt signaling pathways. Required for proper convergent extension cell movements.	0.225149
100021	0.0948642	5.52241	g31460	Sc4wPfr_856	950471	951095	sp|Q7Z494|NPHP3_HUMAN	Required for normal ciliary development and function. Inhibits disheveled-1-induced canonical Wnt-signaling activity and may also play a role in the control of non-canonical Wnt signaling which regulates planar cell polarity. Probably acts as a molecular switch between different Wnt signaling pathways. Required for proper convergent extension cell movements.	0.566454
100022	-0.0484819	4.77023	g31460	Sc4wPfr_856	951609	952219	sp|Q7Z494|NPHP3_HUMAN	Required for normal ciliary development and function. Inhibits disheveled-1-induced canonical Wnt-signaling activity and may also play a role in the control of non-canonical Wnt signaling which regulates planar cell polarity. Probably acts as a molecular switch between different Wnt signaling pathways. Required for proper convergent extension cell movements.	0.886914
100029	0.0836755	4.52121	g31461	Sc4wPfr_856	997336	998635	sp|Q7Z494|NPHP3_HUMAN	Required for normal ciliary development and function. Inhibits disheveled-1-induced canonical Wnt-signaling activity and may also play a role in the control of non-canonical Wnt signaling which regulates planar cell polarity. Probably acts as a molecular switch between different Wnt signaling pathways. Required for proper convergent extension cell movements.	0.808119
10003	-0.012433	4.6442	g2837	Sc4wPfr_121	673018	673899	sp|P10090|WHITE_DROME	Part of a membrane-spanning permease system necessary for the transport of pigment precursors into pigment cells responsible for eye color. White dimerize with brown for the transport of guanine. Scarlet and white complex transports a metabolic intermediate (such as 3-hydroxy kynurenine) from the cytoplasm into the pigment granules.	0.976429
100034	0.0641339	3.53763	g31462	Sc4wPfr_856	1059238	1059684	sp|P17126|ACT_HYDVU	Actins are highly conserved proteins that are involved in various types of cell motility and are ubiquitously expressed in all eukaryotic cells.	0.892564
100035	-0.104503	4.98512	g31462	Sc4wPfr_856	1059989	1060853	sp|P17126|ACT_HYDVU	Actins are highly conserved proteins that are involved in various types of cell motility and are ubiquitously expressed in all eukaryotic cells.	0.636099
100036	-0.0879686	7.93083	g31462	Sc4wPfr_856	1064697	1066752	sp|P17126|ACT_HYDVU	Actins are highly conserved proteins that are involved in various types of cell motility and are ubiquitously expressed in all eukaryotic cells.	0.705643
100037	0.0893632	6.20947	g31462	Sc4wPfr_856	1067635	1068304	sp|P17126|ACT_HYDVU	Actins are highly conserved proteins that are involved in various types of cell motility and are ubiquitously expressed in all eukaryotic cells.	0.631483
100038	0.0260917	3.84473	g31462	Sc4wPfr_856	1068485	1068690	sp|P17126|ACT_HYDVU	Actins are highly conserved proteins that are involved in various types of cell motility and are ubiquitously expressed in all eukaryotic cells.	0.951549
100039	0.123556	5.20739	g31462	Sc4wPfr_856	1069195	1069516	sp|P17126|ACT_HYDVU	Actins are highly conserved proteins that are involved in various types of cell motility and are ubiquitously expressed in all eukaryotic cells.	0.595909
100040	0.0939423	6.32112	g31463	Sc4wPfr_856	1079521	1082311	sp|P21328|RTJK_DROME		0.545196
100047	0.40861	4.02407	g31464	Sc4wPfr_856	1110058	1111186	sp|Q149F3|ERF3B_MOUSE	Involved in translation termination in response to the termination codons UAA, UAG and UGA. May play a role as a potent stimulator of the release factor activity of ETF1. Exhibits GTPase activity, which is ribosome- and ETF1-dependent. May play a role in cell cycle progression. Component of the transient SURF complex which recruits UPF1 to stalled ribosomes in the context of nonsense-mediated dec…	0.0499015
100049	-0.0152135	6.25967	g31464	Sc4wPfr_856	1148390	1149406	sp|Q149F3|ERF3B_MOUSE	Involved in translation termination in response to the termination codons UAA, UAG and UGA. May play a role as a potent stimulator of the release factor activity of ETF1. Exhibits GTPase activity, which is ribosome- and ETF1-dependent. May play a role in cell cycle progression. Component of the transient SURF complex which recruits UPF1 to stalled ribosomes in the context of nonsense-mediated dec…	0.958226
100050	0.0133346	4.24334	g31466	Sc4wPfr_856	1154981	1155989			0.97739
100056	-0.151595	4.04711	g31466	Sc4wPfr_856	1170777	1171435			0.442436
100058	-0.289495	3.19104	g31467	Sc4wPfr_856	1178125	1178816			0.370599
100070	0.00369129	4.20262	g31118	Sc4wPfr_861	9019	9746			0.994593
100075	0.0568379	4.84687	g31118	Sc4wPfr_861	32233	33437			0.875077
100076	-0.0244256	4.77721	g31118	Sc4wPfr_861	35345	36358			0.95126
100079	-0.0274517	3.75655	g31118	Sc4wPfr_861	49159	49926			0.943429
10008	-0.0130556	5.03976		Sc4wPfr_121	698547	699110			0.985273
100080	0.0303396	7.13989	g31119	Sc4wPfr_861	54598	56213	sp|Q9H5L6|THAP9_HUMAN	Active transposase that specifically recognizes the bipartite 5'-TXXGGGX(A/T)-3' consensus motif and mediates transposition.	0.912227
100081	0.153547	4.04339	g31119	Sc4wPfr_861	56895	57158	sp|Q9H5L6|THAP9_HUMAN	Active transposase that specifically recognizes the bipartite 5'-TXXGGGX(A/T)-3' consensus motif and mediates transposition.	0.496201
100084	0.0798378	5.39551	g31119	Sc4wPfr_861	69534	70986	sp|Q9H5L6|THAP9_HUMAN	Active transposase that specifically recognizes the bipartite 5'-TXXGGGX(A/T)-3' consensus motif and mediates transposition.	0.783903
100085	-0.148069	3.63205	g31119	Sc4wPfr_861	79179	80439	sp|Q9H5L6|THAP9_HUMAN	Active transposase that specifically recognizes the bipartite 5'-TXXGGGX(A/T)-3' consensus motif and mediates transposition.	0.581934
100087	-0.00812003	4.29846	g31119	Sc4wPfr_861	85995	86589	sp|Q9H5L6|THAP9_HUMAN	Active transposase that specifically recognizes the bipartite 5'-TXXGGGX(A/T)-3' consensus motif and mediates transposition.	0.984182
10009	0.194008	4.28174		Sc4wPfr_121	699466	699927			0.404301
100090	-0.00596605	4.1101	g31120	Sc4wPfr_861	98323	100439	sp|Q3MSQ8|DDX4_PELLE	Probable ATP-dependent RNA helicase required during spermatogenesis to repress transposable elements and preventing their mobilization, which is essential for the germline integrity. Acts via the piRNA metabolic process, which mediates the repression of transposable elements during meiosis by forming complexes composed of piRNAs and Piwi proteins and governs the methylation and subsequent repress…	0.989592
100093	0.157519	5.73903	g31120	Sc4wPfr_861	119080	120219	sp|Q3MSQ8|DDX4_PELLE	Probable ATP-dependent RNA helicase required during spermatogenesis to repress transposable elements and preventing their mobilization, which is essential for the germline integrity. Acts via the piRNA metabolic process, which mediates the repression of transposable elements during meiosis by forming complexes composed of piRNAs and Piwi proteins and governs the methylation and subsequent repress…	0.350972
100094	-0.0111811	3.56434	g31120	Sc4wPfr_861	121377	121627	sp|Q3MSQ8|DDX4_PELLE	Probable ATP-dependent RNA helicase required during spermatogenesis to repress transposable elements and preventing their mobilization, which is essential for the germline integrity. Acts via the piRNA metabolic process, which mediates the repression of transposable elements during meiosis by forming complexes composed of piRNAs and Piwi proteins and governs the methylation and subsequent repress…	0.98222
100096	0.00189589	4.93158	g31121	Sc4wPfr_861	130050	131168			0.996346
100098	-0.123892	4.21949	g31122	Sc4wPfr_861	140903	142377	sp|Q68FJ9|ATG4D_XENLA	Cysteine protease required for the cytoplasm to vacuole transport (Cvt) and autophagy. Cleaves the C-terminal amino acid of ATG8 family proteins to reveal a C-terminal glycine. Exposure of the glycine at the C-terminus is essential for ATG8 proteins conjugation to phosphatidylethanolamine (PE) and insertion to membranes, which is necessary for autophagy. Has also an activity of delipidating enzym…	0.6084
100099	-0.0615322	5.15638	g31122	Sc4wPfr_861	150527	151710	sp|Q68FJ9|ATG4D_XENLA	Cysteine protease required for the cytoplasm to vacuole transport (Cvt) and autophagy. Cleaves the C-terminal amino acid of ATG8 family proteins to reveal a C-terminal glycine. Exposure of the glycine at the C-terminus is essential for ATG8 proteins conjugation to phosphatidylethanolamine (PE) and insertion to membranes, which is necessary for autophagy. Has also an activity of delipidating enzym…	0.846591
10010	-0.0287459	6.42004		Sc4wPfr_121	705132	705900			0.915773
100114	0.105135	3.52544	g31132	Sc4wPfr_861	235856	236586			0.7461
100117	-0.0161377	5.07511	g31132	Sc4wPfr_861	239962	241004			0.964099
100120	0.0707282	5.61151	g20029	Sc4wPfr_862	44646	46958			0.726476
10013	-0.10898	3.25125		Sc4wPfr_121	739685	740670			0.804668
100132	-0.147256	5.16444	g27210	Sc4wPfr_868	68187	69342			0.434223
100133	0.314359	3.46176	g27210	Sc4wPfr_868	73428	74058			0.101225
100134	0.0218267	4.84701	g27211	Sc4wPfr_868	79802	80603	sp|Q14161|GIT2_HUMAN	GTPase-activating protein for the ADP ribosylation factor family.	0.94751
100138	-0.205916	3.12598	g27211	Sc4wPfr_868	134570	137247	sp|Q14161|GIT2_HUMAN	GTPase-activating protein for the ADP ribosylation factor family.	0.734723
100139	-0.29294	4.82011	g27211	Sc4wPfr_868	144279	145262	sp|Q14161|GIT2_HUMAN	GTPase-activating protein for the ADP ribosylation factor family.	0.0299149
100141	0.408776	3.87971	g27211	Sc4wPfr_868	149341	149689	sp|Q14161|GIT2_HUMAN	GTPase-activating protein for the ADP ribosylation factor family.	0.0252426
100142	0.363033	3.89714	g27211	Sc4wPfr_868	151246	151928	sp|Q14161|GIT2_HUMAN	GTPase-activating protein for the ADP ribosylation factor family.	0.0123407
100147	0.00371528	3.60357	g27216	Sc4wPfr_868	169930	170976			0.994938
100150	0.226044	3.23492	g27217	Sc4wPfr_868	185315	186164	sp|Q7JQ07|MOS1T_DROMA	Mediates transposition of transposon Mos1 by a 'cut and paste' mechanism. Transposases are sequence-specific nucleases and strand transferases that catalyze transposition through an ordered series of events: sequence-specific binding of transposase to the terminal inverted repeats (IR) present at each end of the transposon, pairing of the transposon IRs in a paired-end complex (PEC), cleavage of …	0.361812
100151	-0.1174	4.31558	g27218	Sc4wPfr_868	186473	187405	sp|P98154|IDD_MOUSE	Probably plays a role in neural crest cell migration. May play a role in delivery of extracellular signals.	0.572683
100152	-0.174804	4.78162	g27218	Sc4wPfr_868	191332	192543	sp|P98154|IDD_MOUSE	Probably plays a role in neural crest cell migration. May play a role in delivery of extracellular signals.	0.373864
100154	-0.0111485	5.13548	g27218	Sc4wPfr_868	195610	196457	sp|P98154|IDD_MOUSE	Probably plays a role in neural crest cell migration. May play a role in delivery of extracellular signals.	0.970877
100155	0.190103	4.25017	g27218	Sc4wPfr_868	197946	198571	sp|P98154|IDD_MOUSE	Probably plays a role in neural crest cell migration. May play a role in delivery of extracellular signals.	0.421229
100156	-0.09404	5.00381	g27218	Sc4wPfr_868	203052	205582	sp|P98154|IDD_MOUSE	Probably plays a role in neural crest cell migration. May play a role in delivery of extracellular signals.	0.770077
100157	0.552828	3.23969	g27218	Sc4wPfr_868	213782	214754	sp|P98154|IDD_MOUSE	Probably plays a role in neural crest cell migration. May play a role in delivery of extracellular signals.	0.0135038
100163	0.571343	3.25201	g27218	Sc4wPfr_868	233068	233890	sp|P98154|IDD_MOUSE	Probably plays a role in neural crest cell migration. May play a role in delivery of extracellular signals.	0.0110955
100169	-0.181956	4.19371	g27219	Sc4wPfr_868	265988	267014	sp|P53814|SMTN_HUMAN	Structural protein of the cytoskeleton.	0.465671
100175	-0.149604	4.11844	g27219	Sc4wPfr_868	299865	301645	sp|P53814|SMTN_HUMAN	Structural protein of the cytoskeleton.	0.496927
100176	-0.0917158	5.49992	g27219	Sc4wPfr_868	309964	311748	sp|P53814|SMTN_HUMAN	Structural protein of the cytoskeleton.	0.680662
100179	0.127809	5.17017	g27219	Sc4wPfr_868	318810	319326	sp|P53814|SMTN_HUMAN	Structural protein of the cytoskeleton.	0.548514
100180	0.176699	4.51174	g27219	Sc4wPfr_868	319580	320212	sp|P53814|SMTN_HUMAN	Structural protein of the cytoskeleton.	0.346061
100181	-0.0388456	5.27996	g27219	Sc4wPfr_868	325645	326487	sp|P53814|SMTN_HUMAN	Structural protein of the cytoskeleton.	0.904903
100182	0.113104	5.79875	g27219	Sc4wPfr_868	334699	335258	sp|P53814|SMTN_HUMAN	Structural protein of the cytoskeleton.	0.54528
100183	-0.220836	4.93765	g27219	Sc4wPfr_868	335490	336229	sp|P53814|SMTN_HUMAN	Structural protein of the cytoskeleton.	0.177253
100184	-0.0241059	6.57732	g27219	Sc4wPfr_868	336946	338771	sp|P53814|SMTN_HUMAN	Structural protein of the cytoskeleton.	0.931823
100201	0.0272943	4.36242	g27221	Sc4wPfr_868	424324	424922			0.931307
100202	0.267318	4.98576	g27221	Sc4wPfr_868	438332	439467			0.135536
100203	0.132461	3.67187	g27221	Sc4wPfr_868	439623	440162			0.799279
100205	-0.443041	3.20777	g27222	Sc4wPfr_868	449460	450030	sp|Q80WQ9|ZBED4_MOUSE		0.054022
100206	1.0811	3.40914	g27223	Sc4wPfr_868	453770	454329			3.25746e-06
100214	0.198949	3.80076	g27225	Sc4wPfr_868	504596	505242			0.474988
100216	-0.0916425	5.52845	g27225	Sc4wPfr_868	517496	518676			0.724846
100217	0.210724	5.4339	g27225	Sc4wPfr_868	523310	525196			0.136342
100220	0.301432	3.53885	g16419	Sc4wPfr_869	1981	2889			0.519677
100221	0.522195	4.68017	g16419	Sc4wPfr_869	3101	4033			0.000177215
100223	-0.0983289	3.78757	g16419	Sc4wPfr_869	17176	19802			0.880585
100224	0.306377	3.57585	g16419	Sc4wPfr_869	38433	39044			0.167255
100228	-0.156015	3.81978	g16497	Sc4wPfr_87	29174	30269			0.696058
100233	0.0870439	4.23666	g16498	Sc4wPfr_87	93480	95208	sp|O73606|KCNG2_CHICK	Potassium channel subunit. Modulates channel activity (By similarity).	0.82054
100236	-0.0988747	3.88981	g16499	Sc4wPfr_87	223089	223735			0.831732
100240	0.192547	3.81053	g16500	Sc4wPfr_87	249109	250002	sp|P46824|KLC_DROME	Kinesin is a microtubule-associated force-producing protein that may play a role in organelle transport. The light chain may function in coupling of cargo to the heavy chain or in the modulation of its ATPase activity.	0.505599
100243	-0.242039	5.17137	g16500	Sc4wPfr_87	256661	258964	sp|P46824|KLC_DROME	Kinesin is a microtubule-associated force-producing protein that may play a role in organelle transport. The light chain may function in coupling of cargo to the heavy chain or in the modulation of its ATPase activity.	0.0917699
100244	0.261567	5.75233	g16500	Sc4wPfr_87	263959	265499	sp|P46824|KLC_DROME	Kinesin is a microtubule-associated force-producing protein that may play a role in organelle transport. The light chain may function in coupling of cargo to the heavy chain or in the modulation of its ATPase activity.	0.00985545
100247	0.127018	4.11885	g16500	Sc4wPfr_87	271156	272959	sp|P46824|KLC_DROME	Kinesin is a microtubule-associated force-producing protein that may play a role in organelle transport. The light chain may function in coupling of cargo to the heavy chain or in the modulation of its ATPase activity.	0.765445
10025	-0.306799	3.52876	g2837	Sc4wPfr_121	831747	832778	sp|P10090|WHITE_DROME	Part of a membrane-spanning permease system necessary for the transport of pigment precursors into pigment cells responsible for eye color. White dimerize with brown for the transport of guanine. Scarlet and white complex transports a metabolic intermediate (such as 3-hydroxy kynurenine) from the cytoplasm into the pigment granules.	0.118843
100253	-0.0308556	4.30523	g16501	Sc4wPfr_87	294888	295956			0.946887
100255	-0.0328944	4.30025	g16501	Sc4wPfr_87	311589	312682			0.935935
100258	-0.183471	3.51275	g16503	Sc4wPfr_87	333020	333750	sp|P56696|KCNQ4_HUMAN	Probably important in the regulation of neuronal excitability. May underlie a potassium current involved in regulating the excitability of sensory cells of the cochlea. KCNQ4 channels are blocked by linopirdin, XE991 and bepridil, whereas clofilium is without significant effect. Muscarinic agonist oxotremorine-M strongly suppress KCNQ4 current in CHO cells in which cloned KCNQ4 channels were coex…	0.547881
10026	0.240612	5.41664	g2837	Sc4wPfr_121	853705	854951	sp|P10090|WHITE_DROME	Part of a membrane-spanning permease system necessary for the transport of pigment precursors into pigment cells responsible for eye color. White dimerize with brown for the transport of guanine. Scarlet and white complex transports a metabolic intermediate (such as 3-hydroxy kynurenine) from the cytoplasm into the pigment granules.	0.333968
100260	0.0575502	5.05047	g16503	Sc4wPfr_87	351321	352888	sp|P56696|KCNQ4_HUMAN	Probably important in the regulation of neuronal excitability. May underlie a potassium current involved in regulating the excitability of sensory cells of the cochlea. KCNQ4 channels are blocked by linopirdin, XE991 and bepridil, whereas clofilium is without significant effect. Muscarinic agonist oxotremorine-M strongly suppress KCNQ4 current in CHO cells in which cloned KCNQ4 channels were coex…	0.860951
10027	0.0488303	4.21711	g2838	Sc4wPfr_121	881076	881904	sp|P55075|FGF8_HUMAN	Plays an important role in the regulation of embryonic development, cell proliferation, cell differentiation and cell migration. Required for normal brain, eye, ear and limb development during embryogenesis. Required for normal development of the gonadotropin-releasing hormone (GnRH) neuronal system (PubMed:16384934, PubMed:16597617, PubMed:8663044). Plays a role in neurite outgrowth in hippocamp…	0.897484
100270	-0.0302403	4.17667	g16505	Sc4wPfr_87	393514	394176			0.943812
10028	0.239271	3.84921	g2838	Sc4wPfr_121	901034	902872	sp|P55075|FGF8_HUMAN	Plays an important role in the regulation of embryonic development, cell proliferation, cell differentiation and cell migration. Required for normal brain, eye, ear and limb development during embryogenesis. Required for normal development of the gonadotropin-releasing hormone (GnRH) neuronal system (PubMed:16384934, PubMed:16597617, PubMed:8663044). Plays a role in neurite outgrowth in hippocamp…	0.153151
100287	0.0821492	4.51969	g16517	Sc4wPfr_87	632651	633994	sp|O08688|CAN5_MOUSE	Calcium-regulated non-lysosomal thiol-protease.	0.741519
100289	0.151146	3.43601	g16517	Sc4wPfr_87	656917	658941	sp|O08688|CAN5_MOUSE	Calcium-regulated non-lysosomal thiol-protease.	0.7009
100292	-0.0344538	4.5795	g16526	Sc4wPfr_87	715999	717002	sp|O08688|CAN5_MOUSE	Calcium-regulated non-lysosomal thiol-protease.	0.922959
100293	0.115877	3.74897	g16528	Sc4wPfr_87	744738	745886			0.779156
100295	-0.574425	3.07484	g16528	Sc4wPfr_87	752873	754743			0.0139039
100297	-0.229886	4.19983	g16528	Sc4wPfr_87	760677	761112			0.290491
100300	-0.0381213	4.60218	g16529	Sc4wPfr_87	784630	785328	sp|Q561Q8|MED4_RAT	Component of the Mediator complex, a coactivator involved in the regulated transcription of nearly all RNA polymerase II-dependent genes. Mediator functions as a bridge to convey information from gene-specific regulatory proteins to the basal RNA polymerase II transcription machinery. Mediator is recruited to promoters by direct interactions with regulatory proteins and serves as a scaffold for t…	0.907135
100301	-0.0170217	4.37227	g16529	Sc4wPfr_87	786135	786875	sp|Q561Q8|MED4_RAT	Component of the Mediator complex, a coactivator involved in the regulated transcription of nearly all RNA polymerase II-dependent genes. Mediator functions as a bridge to convey information from gene-specific regulatory proteins to the basal RNA polymerase II transcription machinery. Mediator is recruited to promoters by direct interactions with regulatory proteins and serves as a scaffold for t…	0.966696
100303	0.0494057	3.48772	g16529	Sc4wPfr_87	813087	814715	sp|Q561Q8|MED4_RAT	Component of the Mediator complex, a coactivator involved in the regulated transcription of nearly all RNA polymerase II-dependent genes. Mediator functions as a bridge to convey information from gene-specific regulatory proteins to the basal RNA polymerase II transcription machinery. Mediator is recruited to promoters by direct interactions with regulatory proteins and serves as a scaffold for t…	0.908655
100309	-0.0355031	3.39616	g16532	Sc4wPfr_87	843464	844538			0.947268
10031	-0.150716	4.01764	g2839	Sc4wPfr_121	912225	912638			0.554927
100310	-0.0543953	3.7898	g16533	Sc4wPfr_87	854891	855474	sp|Q8VHV8|SELS_RAT	Involved in the degradation process of misfolded endoplasmic reticulum (ER) luminal proteins. Participates in the transfer of misfolded proteins from the ER to the cytosol, where they are destroyed by the proteasome in a ubiquitin-dependent manner. Probably acts by serving as a linker between DERL1, which mediates the retrotranslocation of misfolded proteins into the cytosol, and the ATPase compl…	0.867736
100311	-0.102918	5.63254	g16533	Sc4wPfr_87	857855	858638	sp|Q8VHV8|SELS_RAT	Involved in the degradation process of misfolded endoplasmic reticulum (ER) luminal proteins. Participates in the transfer of misfolded proteins from the ER to the cytosol, where they are destroyed by the proteasome in a ubiquitin-dependent manner. Probably acts by serving as a linker between DERL1, which mediates the retrotranslocation of misfolded proteins into the cytosol, and the ATPase compl…	0.482835
100314	-0.00302094	5.2392	g16534	Sc4wPfr_87	876967	878017	sp|O08740|RPB11_MOUSE	DNA-dependent RNA polymerase catalyzes the transcription of DNA into RNA using the four ribonucleoside triphosphates as substrates. Component of RNA polymerase II which synthesizes mRNA precursors and many functional non-coding RNAs. Pol II is the central component of the basal RNA polymerase II transcription machinery. It is composed of mobile elements that move relative to each other. RPB11 is …	0.992178
100319	0.323675	2.86095	g16538	Sc4wPfr_87	933798	934381	sp|Q28GD9|RNH2B_XENTR	Non catalytic subunit of RNase H2, an endonuclease that specifically degrades the RNA of RNA:DNA hybrids. Participates in DNA replication, possibly by mediating the removal of lagging-strand Okazaki fragment RNA primers during DNA replication. Mediates the excision of single ribonucleotides from DNA:RNA duplexes (By similarity).	0.421268
10032	0.248437	5.08079	g2839	Sc4wPfr_121	916352	917189			0.116433
100322	0.0621914	5.41168	g16538	Sc4wPfr_87	943146	944036	sp|Q28GD9|RNH2B_XENTR	Non catalytic subunit of RNase H2, an endonuclease that specifically degrades the RNA of RNA:DNA hybrids. Participates in DNA replication, possibly by mediating the removal of lagging-strand Okazaki fragment RNA primers during DNA replication. Mediates the excision of single ribonucleotides from DNA:RNA duplexes (By similarity).	0.79591
100328	0.000603816	4.46724	g16538	Sc4wPfr_87	1028209	1028827	sp|Q28GD9|RNH2B_XENTR	Non catalytic subunit of RNase H2, an endonuclease that specifically degrades the RNA of RNA:DNA hybrids. Participates in DNA replication, possibly by mediating the removal of lagging-strand Okazaki fragment RNA primers during DNA replication. Mediates the excision of single ribonucleotides from DNA:RNA duplexes (By similarity).	0.998694
10033	-0.129234	3.30871	g2839	Sc4wPfr_121	917421	917939			0.769523
100330	0.081141	4.18963	g16538	Sc4wPfr_87	1031155	1031719	sp|Q28GD9|RNH2B_XENTR	Non catalytic subunit of RNase H2, an endonuclease that specifically degrades the RNA of RNA:DNA hybrids. Participates in DNA replication, possibly by mediating the removal of lagging-strand Okazaki fragment RNA primers during DNA replication. Mediates the excision of single ribonucleotides from DNA:RNA duplexes (By similarity).	0.820152
100338	-0.155874	4.53953	g16539	Sc4wPfr_87	1077930	1078751	sp|Q7Z494|NPHP3_HUMAN	Required for normal ciliary development and function. Inhibits disheveled-1-induced canonical Wnt-signaling activity and may also play a role in the control of non-canonical Wnt signaling which regulates planar cell polarity. Probably acts as a molecular switch between different Wnt signaling pathways. Required for proper convergent extension cell movements.	0.55919
100340	0.00405358	3.69086	g16539	Sc4wPfr_87	1097358	1097706	sp|Q7Z494|NPHP3_HUMAN	Required for normal ciliary development and function. Inhibits disheveled-1-induced canonical Wnt-signaling activity and may also play a role in the control of non-canonical Wnt signaling which regulates planar cell polarity. Probably acts as a molecular switch between different Wnt signaling pathways. Required for proper convergent extension cell movements.	0.993528
100341	-0.0594236	4.24001	g16539	Sc4wPfr_87	1098630	1099262	sp|Q7Z494|NPHP3_HUMAN	Required for normal ciliary development and function. Inhibits disheveled-1-induced canonical Wnt-signaling activity and may also play a role in the control of non-canonical Wnt signaling which regulates planar cell polarity. Probably acts as a molecular switch between different Wnt signaling pathways. Required for proper convergent extension cell movements.	0.849717
100346	0.136994	3.90156	g16540	Sc4wPfr_87	1132098	1132918			0.646869
100347	-0.106321	4.199	g16540	Sc4wPfr_87	1136372	1136903			0.743736
100348	-0.166422	4.07135	g16540	Sc4wPfr_87	1143050	1143537			0.440291
100350	-0.102549	4.35184	g16540	Sc4wPfr_87	1145345	1146442			0.680843
100354	-0.172829	3.54951	g16541	Sc4wPfr_87	1178692	1181711			0.679894
100357	-0.0549478	5.14598	g16543	Sc4wPfr_87	1205294	1205937			0.836209
100358	-0.373065	4.09728	g16543	Sc4wPfr_87	1206516	1207274			0.0284814
100359	-0.0552188	5.61148	g16543	Sc4wPfr_87	1208730	1209512			0.874212
10036	-0.00360588	4.74102	g2839	Sc4wPfr_121	930529	931665			0.994238
100360	0.126471	5.29427	g16544	Sc4wPfr_87	1213999	1214991	sp|A6QQ21|CSN6_BOVIN	Component of the COP9 signalosome complex (CSN), a complex involved in various cellular and developmental processes. The CSN complex is an essential regulator of the ubiquitin (Ubl) conjugation pathway by mediating the deneddylation of the cullin subunits of SCF-type E3 ligase complexes, leading to decrease the Ubl ligase activity of SCF-type complexes such as SCF, CSA or DDB2. The complex is als…	0.514073
100363	0.0351014	3.59669	g16544	Sc4wPfr_87	1246348	1247647	sp|A6QQ21|CSN6_BOVIN	Component of the COP9 signalosome complex (CSN), a complex involved in various cellular and developmental processes. The CSN complex is an essential regulator of the ubiquitin (Ubl) conjugation pathway by mediating the deneddylation of the cullin subunits of SCF-type E3 ligase complexes, leading to decrease the Ubl ligase activity of SCF-type complexes such as SCF, CSA or DDB2. The complex is als…	0.937063
100364	-0.406012	3.36896	g16544	Sc4wPfr_87	1249218	1249968	sp|A6QQ21|CSN6_BOVIN	Component of the COP9 signalosome complex (CSN), a complex involved in various cellular and developmental processes. The CSN complex is an essential regulator of the ubiquitin (Ubl) conjugation pathway by mediating the deneddylation of the cullin subunits of SCF-type E3 ligase complexes, leading to decrease the Ubl ligase activity of SCF-type complexes such as SCF, CSA or DDB2. The complex is als…	0.0718534
100368	-0.1356	3.31689	g16544	Sc4wPfr_87	1282856	1283243	sp|A6QQ21|CSN6_BOVIN	Component of the COP9 signalosome complex (CSN), a complex involved in various cellular and developmental processes. The CSN complex is an essential regulator of the ubiquitin (Ubl) conjugation pathway by mediating the deneddylation of the cullin subunits of SCF-type E3 ligase complexes, leading to decrease the Ubl ligase activity of SCF-type complexes such as SCF, CSA or DDB2. The complex is als…	0.730143
100369	0.400672	3.0322	g16544	Sc4wPfr_87	1286431	1286794	sp|A6QQ21|CSN6_BOVIN	Component of the COP9 signalosome complex (CSN), a complex involved in various cellular and developmental processes. The CSN complex is an essential regulator of the ubiquitin (Ubl) conjugation pathway by mediating the deneddylation of the cullin subunits of SCF-type E3 ligase complexes, leading to decrease the Ubl ligase activity of SCF-type complexes such as SCF, CSA or DDB2. The complex is als…	0.105241
100370	0.136577	5.12764	g16545	Sc4wPfr_87	1287404	1288282	sp|Q33E94|RFX4_HUMAN	Transcription factor that plays a role in early brain development. May activate transcription by interacting directly with the X-box. May activate transcription from CX3CL1 promoter through the X-box during brain development.	0.40574
100372	-0.142477	5.03438	g16545	Sc4wPfr_87	1300309	1301319	sp|Q33E94|RFX4_HUMAN	Transcription factor that plays a role in early brain development. May activate transcription by interacting directly with the X-box. May activate transcription from CX3CL1 promoter through the X-box during brain development.	0.463159
100373	0.00848915	3.78668	g16545	Sc4wPfr_87	1309970	1311553	sp|Q33E94|RFX4_HUMAN	Transcription factor that plays a role in early brain development. May activate transcription by interacting directly with the X-box. May activate transcription from CX3CL1 promoter through the X-box during brain development.	0.985342
100377	0.591739	5.00038	g16546	Sc4wPfr_87	1369268	1370037	sp|E7F5E1|CE162_DANRE	Required to promote assembly of the transition zone in primary cilia. Acts by specifically recognizing and binding the axonemal microtubule.	0.0406941
100378	0.0177757	4.76652	g16546	Sc4wPfr_87	1377104	1377874	sp|E7F5E1|CE162_DANRE	Required to promote assembly of the transition zone in primary cilia. Acts by specifically recognizing and binding the axonemal microtubule.	0.960796
100379	0.0762295	5.3694	g16546	Sc4wPfr_87	1378494	1378976	sp|E7F5E1|CE162_DANRE	Required to promote assembly of the transition zone in primary cilia. Acts by specifically recognizing and binding the axonemal microtubule.	0.700635
100380	-0.00641261	5.31445	g16546	Sc4wPfr_87	1380352	1381015	sp|E7F5E1|CE162_DANRE	Required to promote assembly of the transition zone in primary cilia. Acts by specifically recognizing and binding the axonemal microtubule.	0.983467
100381	0.254431	4.35073	g16546	Sc4wPfr_87	1383661	1384431	sp|E7F5E1|CE162_DANRE	Required to promote assembly of the transition zone in primary cilia. Acts by specifically recognizing and binding the axonemal microtubule.	0.39932
100382	-0.0282465	4.48671	g16546	Sc4wPfr_87	1384933	1385601	sp|E7F5E1|CE162_DANRE	Required to promote assembly of the transition zone in primary cilia. Acts by specifically recognizing and binding the axonemal microtubule.	0.944038
100387	-0.24395	4.44523	g16547	Sc4wPfr_87	1400926	1401729	sp|Q6PBF0|RL8_XENTR	Component of the large ribosomal subunit.	0.0737492
100390	-0.0944471	4.6635	g16547	Sc4wPfr_87	1414252	1415819	sp|Q6PBF0|RL8_XENTR	Component of the large ribosomal subunit.	0.658678
100391	0.0442321	5.90214	g16547	Sc4wPfr_87	1419830	1420906	sp|Q6PBF0|RL8_XENTR	Component of the large ribosomal subunit.	0.876675
100397	0.00779503	4.83913	g16548	Sc4wPfr_87	1434701	1435695			0.983467
100398	-0.089391	4.6236	g16549	Sc4wPfr_87	1444839	1445457	sp|Q8BHJ5|TBL1R_MOUSE	F-box-like protein involved in the recruitment of the ubiquitin/19S proteasome complex to nuclear receptor-regulated transcription units. Plays an essential role in transcription activation mediated by nuclear receptors. Probably acts as integral component of the N-Cor corepressor complex that mediates the recruitment of the 19S proteasome complex, leading to the subsequent proteasomal degradatio…	0.694585
100399	0.0349583	5.88067	g16549	Sc4wPfr_87	1446935	1447799	sp|Q8BHJ5|TBL1R_MOUSE	F-box-like protein involved in the recruitment of the ubiquitin/19S proteasome complex to nuclear receptor-regulated transcription units. Plays an essential role in transcription activation mediated by nuclear receptors. Probably acts as integral component of the N-Cor corepressor complex that mediates the recruitment of the 19S proteasome complex, leading to the subsequent proteasomal degradatio…	0.908926
100403	0.183441	5.22956	g16551	Sc4wPfr_87	1484102	1485147			0.301546
100406	-0.176928	4.44845	g16553	Sc4wPfr_87	1509916	1512499	sp|O00410|IPO5_HUMAN	Functions in nuclear protein import as nuclear transport receptor. Serves as receptor for nuclear localization signals (NLS) in cargo substrates. Is thought to mediate docking of the importin/substrate complex to the nuclear pore complex (NPC) through binding to nucleoporin and the complex is subsequently translocated through the pore by an energy requiring, Ran-dependent mechanism. At the nucleo…	0.332496
100408	-0.0632205	5.28946	g16553	Sc4wPfr_87	1543752	1544667	sp|O00410|IPO5_HUMAN	Functions in nuclear protein import as nuclear transport receptor. Serves as receptor for nuclear localization signals (NLS) in cargo substrates. Is thought to mediate docking of the importin/substrate complex to the nuclear pore complex (NPC) through binding to nucleoporin and the complex is subsequently translocated through the pore by an energy requiring, Ran-dependent mechanism. At the nucleo…	0.775338
10041	0.214444	5.64115	g2840	Sc4wPfr_121	952636	954018	sp|Q8T135|KIF5_DICDI	Microtubule-associated force-producing protein that plays a role in organelle transport. Its motor activity is directed toward the microtubule's plus end (By similarity). May connect microtubules to actin filaments. Associates with actin-based structures in cells and is likely involved in the organization of actin cytoskeletons in such structures.	0.320924
100410	0.0486219	4.96973	g16554	Sc4wPfr_87	1546834	1547583	sp|P21328|RTJK_DROME		0.880949
100412	-0.103525	4.8837	g16556	Sc4wPfr_87	1575624	1576351			0.733224
100414	-0.147352	4.5131	g16556	Sc4wPfr_87	1579146	1579796			0.637193
100416	0.0498099	4.11646	g16556	Sc4wPfr_87	1590379	1591392			0.902362
100418	-0.0338176	5.25126	g16557	Sc4wPfr_87	1599691	1600938	sp|Q09604|VAB15_CAEEL	Probable transcription factor needed for the proper production of touch cell precursors. Essential for embryonic morphogenesis.	0.899016
100419	-0.172373	5.5047	g16557	Sc4wPfr_87	1609899	1610556	sp|Q09604|VAB15_CAEEL	Probable transcription factor needed for the proper production of touch cell precursors. Essential for embryonic morphogenesis.	0.520369
10042	0.0381002	5.96832	g2842	Sc4wPfr_121	961421	962462			0.862418
100420	-0.233947	4.94599	g16557	Sc4wPfr_87	1611891	1612278	sp|Q09604|VAB15_CAEEL	Probable transcription factor needed for the proper production of touch cell precursors. Essential for embryonic morphogenesis.	0.203686
100421	-0.992184	3.53402	g16557	Sc4wPfr_87	1613646	1614337	sp|Q09604|VAB15_CAEEL	Probable transcription factor needed for the proper production of touch cell precursors. Essential for embryonic morphogenesis.	1.71438e-05
100422	-0.327823	5.13065	g16557	Sc4wPfr_87	1614716	1615498	sp|Q09604|VAB15_CAEEL	Probable transcription factor needed for the proper production of touch cell precursors. Essential for embryonic morphogenesis.	0.101225
100425	0.00520223	5.68935	g16558	Sc4wPfr_87	1635598	1636652	sp|P72745|Y1101_SYNY3		0.985461
100432	-0.115265	3.81118	g16558	Sc4wPfr_87	1686921	1687736	sp|P72745|Y1101_SYNY3		0.764047
100443	-0.211036	4.1975	g5272	Sc4wPfr_87.1	18010	19804	sp|Q9NSK0|KLC4_HUMAN	Kinesin is a microtubule-associated force-producing protein that may play a role in organelle transport. The light chain may function in coupling of cargo to the heavy chain or in the modulation of its ATPase activity (By similarity).	0.249577
100444	0.0186096	4.73902	g5272	Sc4wPfr_87.1	20820	23524	sp|Q9NSK0|KLC4_HUMAN	Kinesin is a microtubule-associated force-producing protein that may play a role in organelle transport. The light chain may function in coupling of cargo to the heavy chain or in the modulation of its ATPase activity (By similarity).	0.975997
100446	0.00329954	3.89833	g5273	Sc4wPfr_87.1	40224	41510	sp|Q96MB7|HARB1_HUMAN	Transposase-derived protein that may have nuclease activity (Potential). Does not have transposase activity.	0.996763
100447	-0.0508407	3.38971	g5273	Sc4wPfr_87.1	41760	42681	sp|Q96MB7|HARB1_HUMAN	Transposase-derived protein that may have nuclease activity (Potential). Does not have transposase activity.	0.943691
100449	-0.0331573	4.05063	g5273	Sc4wPfr_87.1	54461	54828	sp|Q96MB7|HARB1_HUMAN	Transposase-derived protein that may have nuclease activity (Potential). Does not have transposase activity.	0.939991
100453	0.0278037	3.51951	g5274	Sc4wPfr_87.1	78544	79172	sp|Q7Z494|NPHP3_HUMAN	Required for normal ciliary development and function. Inhibits disheveled-1-induced canonical Wnt-signaling activity and may also play a role in the control of non-canonical Wnt signaling which regulates planar cell polarity. Probably acts as a molecular switch between different Wnt signaling pathways. Required for proper convergent extension cell movements.	0.95627
100454	0.205932	5.23683	g5274	Sc4wPfr_87.1	79448	80360	sp|Q7Z494|NPHP3_HUMAN	Required for normal ciliary development and function. Inhibits disheveled-1-induced canonical Wnt-signaling activity and may also play a role in the control of non-canonical Wnt signaling which regulates planar cell polarity. Probably acts as a molecular switch between different Wnt signaling pathways. Required for proper convergent extension cell movements.	0.144931
100458	0.0599295	3.73781	g5275	Sc4wPfr_87.1	109637	110675	sp|A6H8H5|KCNB2_MOUSE	Voltage-gated potassium channel that mediates transmembrane potassium transport in excitable membranes, primarily in the brain and smooth muscle cells. Channels open or close in response to the voltage difference across the membrane, letting potassium ions pass in accordance with their electrochemical gradient. Homotetrameric channels mediate a delayed-rectifier voltage-dependent outward potassiu…	0.902806
10046	0.0286135	4.67946	g2840	Sc4wPfr_121	993647	997292	sp|Q8T135|KIF5_DICDI	Microtubule-associated force-producing protein that plays a role in organelle transport. Its motor activity is directed toward the microtubule's plus end (By similarity). May connect microtubules to actin filaments. Associates with actin-based structures in cells and is likely involved in the organization of actin cytoskeletons in such structures.	0.943812
100461	-0.103016	3.97025	g5275	Sc4wPfr_87.1	128713	129779	sp|A6H8H5|KCNB2_MOUSE	Voltage-gated potassium channel that mediates transmembrane potassium transport in excitable membranes, primarily in the brain and smooth muscle cells. Channels open or close in response to the voltage difference across the membrane, letting potassium ions pass in accordance with their electrochemical gradient. Homotetrameric channels mediate a delayed-rectifier voltage-dependent outward potassiu…	0.790181
100463	0.165596	4.22774	g5275	Sc4wPfr_87.1	131588	132480	sp|A6H8H5|KCNB2_MOUSE	Voltage-gated potassium channel that mediates transmembrane potassium transport in excitable membranes, primarily in the brain and smooth muscle cells. Channels open or close in response to the voltage difference across the membrane, letting potassium ions pass in accordance with their electrochemical gradient. Homotetrameric channels mediate a delayed-rectifier voltage-dependent outward potassiu…	0.376915
100464	-0.0758302	5.66459	g5275	Sc4wPfr_87.1	140234	141093	sp|A6H8H5|KCNB2_MOUSE	Voltage-gated potassium channel that mediates transmembrane potassium transport in excitable membranes, primarily in the brain and smooth muscle cells. Channels open or close in response to the voltage difference across the membrane, letting potassium ions pass in accordance with their electrochemical gradient. Homotetrameric channels mediate a delayed-rectifier voltage-dependent outward potassiu…	0.635787
100465	0.0173087	4.19435	g5275	Sc4wPfr_87.1	144542	147169	sp|A6H8H5|KCNB2_MOUSE	Voltage-gated potassium channel that mediates transmembrane potassium transport in excitable membranes, primarily in the brain and smooth muscle cells. Channels open or close in response to the voltage difference across the membrane, letting potassium ions pass in accordance with their electrochemical gradient. Homotetrameric channels mediate a delayed-rectifier voltage-dependent outward potassiu…	0.968992
100468	-0.0314998	5.1955	g5276	Sc4wPfr_87.1	154802	155270	sp|Q9DBG7|SRPRA_MOUSE	Component of the SRP (signal recognition particle) receptor. Ensures, in conjunction with the signal recognition particle, the correct targeting of the nascent secretory proteins to the endoplasmic reticulum membrane system (By similarity).	0.918616
100473	-0.0994699	3.89716	g5282	Sc4wPfr_87.1	191435	193659	sp|Q9U5L1|SRPRA_DROME	Component of the SRP (signal recognition particle) receptor. Ensures, in conjunction with the signal recognition particle, the correct targeting of the nascent secretory proteins to the endoplasmic reticulum membrane system (By similarity). May have a role in axonogenesis.	0.76239
100477	0.0442834	4.4859	g5283	Sc4wPfr_87.1	207788	208699	sp|O60344|ECE2_HUMAN		0.908637
100479	-0.0378652	6.1774	g5283	Sc4wPfr_87.1	214527	215420	sp|O60344|ECE2_HUMAN		0.865373
100483	-0.0188617	5.32248	g5289	Sc4wPfr_87.1	263425	264044	sp|Q7ZUW2|HYOU1_DANRE	Has a pivotal role in cytoprotective cellular mechanisms triggered by oxygen deprivation. May play a role as a molecular chaperone and participate in protein folding.	0.956389
100487	-0.10394	4.49917	g5289	Sc4wPfr_87.1	290047	293174	sp|Q7ZUW2|HYOU1_DANRE	Has a pivotal role in cytoprotective cellular mechanisms triggered by oxygen deprivation. May play a role as a molecular chaperone and participate in protein folding.	0.725543
100491	-0.0277753	4.70997	g5291	Sc4wPfr_87.1	316977	317805	sp|P61025|CKS1_MOUSE	Binds to the catalytic subunit of the cyclin dependent kinases and is essential for their biological function.	0.945246
100494	-0.0487569	4.28244	g5291	Sc4wPfr_87.1	339974	340519	sp|P61025|CKS1_MOUSE	Binds to the catalytic subunit of the cyclin dependent kinases and is essential for their biological function.	0.896716
100498	-0.110847	3.72577	g20012	Sc4wPfr_870	51709	52324			0.78943
100500	-0.0352954	2.75271	g20013	Sc4wPfr_870	71560	72530			0.963071
100502	-0.0449319	4.47472	g20013	Sc4wPfr_870	81847	82576			0.905689
100514	-0.0493446	4.21307	g32042	Sc4wPfr_873	78493	79903			0.870955
100516	-0.0418232	4.06154	g32045	Sc4wPfr_873	159535	160849	sp|Q593B6|FA5_PSETE	Central regulator of hemostasis. It serves as a critical cofactor for the prothrombinase activity of factor Xa that results in the activation of prothrombin to thrombin (By similarity).	0.918616
100521	-0.0448663	4.29452	g32048	Sc4wPfr_873	340399	341379			0.89804
100536	0.372306	3.65892	g32050	Sc4wPfr_873	406436	407641			0.0370327
100537	0.947502	3.51977	g32050	Sc4wPfr_873	407813	409840			4.7595e-07
100538	0.0116541	5.28789	g32050	Sc4wPfr_873	418399	419587			0.980585
100539	-0.178072	4.06994	g32050	Sc4wPfr_873	423457	425053			0.526082
10054	0.00902546	4.74697	g2848	Sc4wPfr_121	1053780	1054424	sp|Q96DM1|PGBD4_HUMAN		0.981037
100540	0.0690941	3.06509	g32050	Sc4wPfr_873	426603	427667			0.910076
100541	-0.0741289	3.66093	g32050	Sc4wPfr_873	434030	435696			0.888871
100546	-0.0831222	4.90024	g32051	Sc4wPfr_873	465797	466602			0.691715
100549	0.213799	4.59528	g32052	Sc4wPfr_873	478964	480085	sp|P18433|PTPRA_HUMAN		0.193504
10055	-0.0458702	3.50274	g2849	Sc4wPfr_121	1058965	1059540			0.928704
10056	0.0188296	4.91861	g2849	Sc4wPfr_121	1067326	1067936			0.955865
100568	0.00382687	3.38174	g17134	Sc4wPfr_875.1	87328	87486	sp|Q9QYU3|KCNG2_RAT	Potassium channel subunit. Modulates channel activity by shifting the threshold and the half-maximal activation to more negative values (By similarity).	0.994816
100575	-0.0653795	4.13492	g17136	Sc4wPfr_875.1	161122	161894	sp|P56696|KCNQ4_HUMAN	Probably important in the regulation of neuronal excitability. May underlie a potassium current involved in regulating the excitability of sensory cells of the cochlea. KCNQ4 channels are blocked by linopirdin, XE991 and bepridil, whereas clofilium is without significant effect. Muscarinic agonist oxotremorine-M strongly suppress KCNQ4 current in CHO cells in which cloned KCNQ4 channels were coex…	0.849953
100577	-0.0339644	2.99307	g17136	Sc4wPfr_875.1	163014	163531	sp|P56696|KCNQ4_HUMAN	Probably important in the regulation of neuronal excitability. May underlie a potassium current involved in regulating the excitability of sensory cells of the cochlea. KCNQ4 channels are blocked by linopirdin, XE991 and bepridil, whereas clofilium is without significant effect. Muscarinic agonist oxotremorine-M strongly suppress KCNQ4 current in CHO cells in which cloned KCNQ4 channels were coex…	0.95732
100581	0.773103	3.48453	g17138	Sc4wPfr_875.1	203357	203925			7.29336e-05
100586	0.0888682	4.3013	g17138	Sc4wPfr_875.1	225088	225822			0.7267
100588	-0.041518	5.03914	g17139	Sc4wPfr_875.1	233473	234361	sp|Q90610|NEO1_CHICK	May be involved as a regulatory protein in the transition of undifferentiated proliferating cells to their differentiated state. May also function as a cell adhesion molecule in a broad spectrum of embryonic and adult tissues.	0.876385
100589	0.721184	2.91033	g17139	Sc4wPfr_875.1	234565	235047	sp|Q90610|NEO1_CHICK	May be involved as a regulatory protein in the transition of undifferentiated proliferating cells to their differentiated state. May also function as a cell adhesion molecule in a broad spectrum of embryonic and adult tissues.	0.00384212
100590	0.156756	3.73549	g17139	Sc4wPfr_875.1	239394	240122	sp|Q90610|NEO1_CHICK	May be involved as a regulatory protein in the transition of undifferentiated proliferating cells to their differentiated state. May also function as a cell adhesion molecule in a broad spectrum of embryonic and adult tissues.	0.553848
100591	0.0899927	6.31348	g17139	Sc4wPfr_875.1	242096	243763	sp|Q90610|NEO1_CHICK	May be involved as a regulatory protein in the transition of undifferentiated proliferating cells to their differentiated state. May also function as a cell adhesion molecule in a broad spectrum of embryonic and adult tissues.	0.607712
100594	0.0350894	3.32003	g17140	Sc4wPfr_875.1	257047	257943			0.946001
100596	-0.0281509	3.43461	g17142	Sc4wPfr_875.1	265375	265977			0.95126
1006	-0.0204028	4.91622	g13514	Sc4wPfr_1010	221207	222296	sp|Q9BX10|GTPB2_HUMAN		0.954959
100601	-0.0400362	2.64411	g17143	Sc4wPfr_875.1	270562	270973			0.962717
100603	0.0491945	4.03479	g17143	Sc4wPfr_875.1	275964	276399			0.910873
100605	0.274463	4.19241	g17144	Sc4wPfr_875.1	305053	305873	sp|Q9R0Y1|ASIC5_MOUSE	Cation channel that gives rise to very low constitutive currents in the absence of activation. The activated channel exhibits selectivity for sodium and lithium, and is inhibited by amiloride (By similarity).	0.0600294
100606	0.205305	4.42962	g17144	Sc4wPfr_875.1	307103	308249	sp|Q9R0Y1|ASIC5_MOUSE	Cation channel that gives rise to very low constitutive currents in the absence of activation. The activated channel exhibits selectivity for sodium and lithium, and is inhibited by amiloride (By similarity).	0.300893
100607	0.156969	3.43813	g17144	Sc4wPfr_875.1	312758	313698	sp|Q9R0Y1|ASIC5_MOUSE	Cation channel that gives rise to very low constitutive currents in the absence of activation. The activated channel exhibits selectivity for sodium and lithium, and is inhibited by amiloride (By similarity).	0.608404
100610	1.58414	4.00879	g17146	Sc4wPfr_875.1	322834	323700	sp|Q7JQ07|MOS1T_DROMA	Mediates transposition of transposon Mos1 by a 'cut and paste' mechanism. Transposases are sequence-specific nucleases and strand transferases that catalyze transposition through an ordered series of events: sequence-specific binding of transposase to the terminal inverted repeats (IR) present at each end of the transposon, pairing of the transposon IRs in a paired-end complex (PEC), cleavage of …	1.45704e-12
10062	0.0939431	5.85488	g2850	Sc4wPfr_121	1111496	1112979	sp|Q5PQL2|RCD1_RAT	Component of the CCR4-NOT complex which is one of the major cellular mRNA deadenylases and is linked to various cellular processes including bulk mRNA degradation, miRNA-mediated repression, translational repression during translational initiation and general transcription regulation. Additional complex functions may be a consequence of its influence on mRNA expression. Involved in down-regulatio…	0.631602
100627	-0.0278936	3.85934	g17150	Sc4wPfr_875.1	466878	468078	sp|Q02006|Y4233_RHOPA		0.956925
10063	0.00148622	5.82145	g2851	Sc4wPfr_121	1120237	1121764	sp|Q24509|STX5_DROME	Mediates endoplasmic reticulum to Golgi transport.	0.996687
100630	0.405627	3.67851	g17150	Sc4wPfr_875.1	481594	482440	sp|Q02006|Y4233_RHOPA		0.0242974
100633	-0.131016	3.53305	g17150	Sc4wPfr_875.1	490101	490846	sp|Q02006|Y4233_RHOPA		0.583093
100634	0.0151351	4.2543	g17150	Sc4wPfr_875.1	494245	494962	sp|Q02006|Y4233_RHOPA		0.971228
100637	0.0677313	3.77824	g17151	Sc4wPfr_875.1	504216	504870			0.853752
100638	0.260917	5.60946	g17151	Sc4wPfr_875.1	506666	507666			0.127727
10064	0.0195124	4.03348	g2851	Sc4wPfr_121	1129676	1132569	sp|Q24509|STX5_DROME	Mediates endoplasmic reticulum to Golgi transport.	0.96641
100642	0.108887	5.23416	g17151	Sc4wPfr_875.1	535313	535839			0.681373
100643	-0.295136	6.57782	g17151	Sc4wPfr_875.1	536812	539743			0.702236
100644	-0.0838457	5.38123	g17151	Sc4wPfr_875.1	551830	552454			0.685229
100645	0.0303059	4.14847	g17152	Sc4wPfr_875.1	556785	557381	sp|P19204|CASQ2_CHICK	Calsequestrin is a high-capacity, moderate affinity, calcium-binding protein and thus acts as an internal calcium store in muscle. Calcium ions are bound by clusters of acidic residues at the protein surface, especially at the interface between subunits. Can bind around 60 Ca(2+) ions. Regulates the release of lumenal Ca(2+) via the calcium release channel RYR2; this plays an important role in tr…	0.945175
100647	-0.176504	3.90244	g17152	Sc4wPfr_875.1	600216	602392	sp|P19204|CASQ2_CHICK	Calsequestrin is a high-capacity, moderate affinity, calcium-binding protein and thus acts as an internal calcium store in muscle. Calcium ions are bound by clusters of acidic residues at the protein surface, especially at the interface between subunits. Can bind around 60 Ca(2+) ions. Regulates the release of lumenal Ca(2+) via the calcium release channel RYR2; this plays an important role in tr…	0.583206
100654	-0.0914856	6.55245	g17153	Sc4wPfr_875.1	642709	643538	sp|O14958|CASQ2_HUMAN	Calsequestrin is a high-capacity, moderate affinity, calcium-binding protein and thus acts as an internal calcium store in muscle. Calcium ions are bound by clusters of acidic residues at the protein surface, especially at the interface between subunits. Can bind around 60 Ca(2+) ions. Regulates the release of lumenal Ca(2+) via the calcium release channel RYR2; this plays an important role in tr…	0.583885
100655	-0.214404	5.67728	g17154	Sc4wPfr_875.1	645815	647229	sp|Q9EPB1|DPP2_RAT	Plays an important role in the degradation of some oligopeptides.	0.15677
100659	-0.518917	3.10823	g17154	Sc4wPfr_875.1	662732	664027	sp|Q9EPB1|DPP2_RAT	Plays an important role in the degradation of some oligopeptides.	0.117312
100662	0.00591442	5.84384	g17154	Sc4wPfr_875.1	669955	671058	sp|Q9EPB1|DPP2_RAT	Plays an important role in the degradation of some oligopeptides.	0.983062
100665	-0.0288731	6.23512	g17155	Sc4wPfr_875.1	687762	688653			0.945465
100666	0.145395	3.81507	g17155	Sc4wPfr_875.1	689547	690242			0.67596
100667	-0.219098	4.47047	g17155	Sc4wPfr_875.1	698187	700790			0.583206
100668	-0.026802	4.90665	g17156	Sc4wPfr_875.1	704324	705123			0.940123
100669	-0.168095	4.38529	g17156	Sc4wPfr_875.1	706835	708245			0.592465
100670	-0.101252	3.69037	g17157	Sc4wPfr_875.1	708521	709482			0.832365
100671	0.148344	3.84986	g17157	Sc4wPfr_875.1	718034	719196			0.573382
100680	-0.0243746	4.51384	g17160	Sc4wPfr_875.1	748365	750082			0.94195
1007	0.0338866	3.34284	g13514	Sc4wPfr_1010	233263	235776	sp|Q9BX10|GTPB2_HUMAN		0.957186
100703	-0.0596841	4.54384	g26599	Sc4wPfr_877.1	247373	249256	sp|Q9EPK7|XPO7_MOUSE	Mediates the nuclear export of proteins (cargos) with broad substrate specificity. In the nucleus binds cooperatively to its cargo and to the GTPase Ran in its active GTP-bound form. Docking of this trimeric complex to the nuclear pore complex (NPC) is mediated through binding to nucleoporins. Upon transit of a nuclear export complex into the cytoplasm, disassembling of the complex and hydrolysis…	0.839055
100706	0.012572	3.60058	g26600	Sc4wPfr_877.1	265859	266589	sp|B5X5D0|CI116_SALSA		0.981445
100707	0.0317174	4.67048	g26601	Sc4wPfr_877.1	274952	275978	sp|Q9PUE4|COPG2_DANRE	The coatomer is a cytosolic protein complex that binds to dilysine motifs and reversibly associates with Golgi non-clathrin-coated vesicles, which further mediate biosynthetic protein transport from the ER, via the Golgi up to the trans Golgi network. Coatomer complex is required for budding from Golgi membranes, and is essential for the retrograde Golgi-to-ER transport of dilysine-tagged protein…	0.928677
10071	0.584391	3.41964	g2855	Sc4wPfr_121	1181556	1182152			0.00248535
100711	0.119079	4.45362	g26601	Sc4wPfr_877.1	299631	300550	sp|Q9PUE4|COPG2_DANRE	The coatomer is a cytosolic protein complex that binds to dilysine motifs and reversibly associates with Golgi non-clathrin-coated vesicles, which further mediate biosynthetic protein transport from the ER, via the Golgi up to the trans Golgi network. Coatomer complex is required for budding from Golgi membranes, and is essential for the retrograde Golgi-to-ER transport of dilysine-tagged protein…	0.625606
100712	-0.0750072	4.10491	g6478	Sc4wPfr_878	19276	21422			0.915548
100719	0.0286829	3.09588	g6483	Sc4wPfr_878	76939	78071			0.975004
100720	-0.0457688	5.76561	g6483	Sc4wPfr_878	78337	79575			0.866609
10073	-0.072268	3.34121	g2855	Sc4wPfr_121	1194837	1196906			0.892816
100737	0.0794121	4.45261	g6488	Sc4wPfr_878	233951	235234			0.775338
100738	-0.0112535	4.90441	g6488	Sc4wPfr_878	240098	241220			0.973217
100743	0.229609	3.43747	g6493	Sc4wPfr_878	278305	279562	sp|Q6P0H6|CSN4_DANRE	Component of the COP9 signalosome complex (CSN), a complex involved in various cellular and developmental processes. The CSN complex is an essential regulator of the ubiquitin (Ubl) conjugation pathway by mediating the deneddylation of the cullin subunits of E3 ligase complexes, leading to modify the Ubl ligase activity (By similarity).	0.493212
100747	-0.112092	5.1715	g6494	Sc4wPfr_878	295425	296196	sp|Q99MU0|DBF4A_CRIGR	Regulatory subunit for CDC7 which activates its kinase activity thereby playing a central role in DNA replication and cell proliferation. Required for progression of S phase. The complex CDC7-DBF4A selectively phosphorylates MCM2 subunit at 'Ser-40' and 'Ser-53' and then is involved in regulating the initiation of DNA replication during cell cycle (By similarity).	0.378789
100749	0.0476913	4.97018	g6495	Sc4wPfr_878	328978	330060	sp|Q5RC56|NDKA_PONAB	Major role in the synthesis of nucleoside triphosphates other than ATP. The ATP gamma phosphate is transferred to the NDP beta phosphate via a ping-pong mechanism, using a phosphorylated active-site intermediate. Possesses nucleoside-diphosphate kinase, serine/threonine-specific protein kinase, geranyl and farnesyl pyrophosphate kinase, histidine protein kinase and 3'-5' exonuclease activities. I…	0.888871
100755	0.185595	3.52263	g6496	Sc4wPfr_878	361190	362953	sp|Q8NFR7|CC148_HUMAN		0.52816
100759	0.0390366	5.70782	g6515	Sc4wPfr_878	416572	417615	sp|Q10473|GALT1_RAT	Catalyzes the initial reaction in O-linked oligosaccharide biosynthesis, the transfer of an N-acetyl-D-galactosamine residue to a serine or threonine residue on the protein receptor. Has a broad spectrum of substrates for peptides such as EA2, Muc5AC, Muc1a, Muc1b and Muc7.	0.897496
10076	-0.194241	3.45112	g2855	Sc4wPfr_121	1241403	1242178			0.424832
100760	0.0322829	5.6074	g6515	Sc4wPfr_878	418374	419759	sp|Q10473|GALT1_RAT	Catalyzes the initial reaction in O-linked oligosaccharide biosynthesis, the transfer of an N-acetyl-D-galactosamine residue to a serine or threonine residue on the protein receptor. Has a broad spectrum of substrates for peptides such as EA2, Muc5AC, Muc1a, Muc1b and Muc7.	0.917408
100764	-0.0557255	5.15413	g6515	Sc4wPfr_878	444525	445548	sp|Q10473|GALT1_RAT	Catalyzes the initial reaction in O-linked oligosaccharide biosynthesis, the transfer of an N-acetyl-D-galactosamine residue to a serine or threonine residue on the protein receptor. Has a broad spectrum of substrates for peptides such as EA2, Muc5AC, Muc1a, Muc1b and Muc7.	0.851855
100766	0.158849	4.49383	g6515	Sc4wPfr_878	454553	455823	sp|Q10473|GALT1_RAT	Catalyzes the initial reaction in O-linked oligosaccharide biosynthesis, the transfer of an N-acetyl-D-galactosamine residue to a serine or threonine residue on the protein receptor. Has a broad spectrum of substrates for peptides such as EA2, Muc5AC, Muc1a, Muc1b and Muc7.	0.589697
100768	-0.0122913	4.4631	g6516	Sc4wPfr_878	484147	484792	sp|Q3TZZ7|ESYT2_MOUSE	Tethers the endoplasmic reticulum to the cell membrane and promotes the formation of appositions between the endoplasmic reticulum and the cell membrane. Binds glycerophospholipids in a barrel-like domain and may play a role in cellular lipid transport. Plays a role in FGF signaling via its role in the rapid internalization of FGFR1 that has been activated by FGF1 binding; this occurs most likely…	0.98213
10077	-0.138349	5.51682	g2855	Sc4wPfr_121	1253466	1254007			0.333947
100773	-0.0441204	4.82598	g6516	Sc4wPfr_878	528449	528966	sp|Q3TZZ7|ESYT2_MOUSE	Tethers the endoplasmic reticulum to the cell membrane and promotes the formation of appositions between the endoplasmic reticulum and the cell membrane. Binds glycerophospholipids in a barrel-like domain and may play a role in cellular lipid transport. Plays a role in FGF signaling via its role in the rapid internalization of FGFR1 that has been activated by FGF1 binding; this occurs most likely…	0.886392
100776	-0.0270264	4.38373	g6517	Sc4wPfr_878	539259	540049	sp|Q5SVZ6|ZMYM1_HUMAN		0.948494
100780	0.0111368	6.21711	g6520	Sc4wPfr_878	577748	578470	sp|A0FGR8|ESYT2_HUMAN	Tethers the endoplasmic reticulum to the cell membrane and promotes the formation of appositions between the endoplasmic reticulum and the cell membrane. Binds glycerophospholipids in a barrel-like domain and may play a role in cellular lipid transport. Plays a role in FGF signaling via its role in the rapid internalization of FGFR1 that has been activated by FGF1 binding; this occurs most likely…	0.973538
100786	-0.315686	3.44939	g6523	Sc4wPfr_878	648756	649594	sp|Q5EA92|AL14E_BOVIN	Through its interaction with ARL14 and MYO1E, may connect MHC class II-containing cytoplasmic vesicles to the actin network and hence controls the movement of these vesicles along the actin cytoskeleton in dendritic cells.	0.112907
100790	-0.0480504	3.56317	g6525	Sc4wPfr_878	667333	668004			0.907259
100791	0.0260679	3.85802	g6525	Sc4wPfr_878	669018	669693			0.953285
100792	-0.110424	4.23612	g6525	Sc4wPfr_878	670858	671540			0.716469
100794	-0.17938	3.60924	g6526	Sc4wPfr_878	694789	695702	sp|P13116|SRC2_XENLA		0.535452
100798	0.663453	5.01848	g6526	Sc4wPfr_878	718410	719456	sp|P13116|SRC2_XENLA		2.2365e-08
100799	0.404747	4.64325	g6526	Sc4wPfr_878	724576	725223	sp|P13116|SRC2_XENLA		0.00446375
100800	0.177769	5.48525	g6526	Sc4wPfr_878	726293	727312	sp|P13116|SRC2_XENLA		0.216904
100803	0.197167	4.45838	g6526	Sc4wPfr_878	730095	730726	sp|P13116|SRC2_XENLA		0.321771
100804	0.0789596	5.47002	g6527	Sc4wPfr_878	733411	734979	sp|Q8TCB7|METL6_HUMAN	Probable methyltransferase.	0.678275
100805	0.346522	3.87761	g6529	Sc4wPfr_878	750120	750795	sp|Q8BVH9|METL6_MOUSE	Probable methyltransferase.	0.0667014
100806	0.0518785	5.45188	g6530	Sc4wPfr_878	752877	754002	sp|Q7SZR5|SUMO1_DANRE	Ubiquitin-like protein that can be covalently attached to proteins as a monomer or a lysine-linked polymer. Covalent attachment via an isopeptide bond to its substrates requires prior activation by the E1 complex sae1-sae2 and linkage to the E2 enzyme ube2i. This post-translational modification on lysine residues of proteins plays a crucial role in a number of cellular processes such as nuclear t…	0.84702
100808	-5.00579e-05	4.62577	g6530	Sc4wPfr_878	761982	763881	sp|Q7SZR5|SUMO1_DANRE	Ubiquitin-like protein that can be covalently attached to proteins as a monomer or a lysine-linked polymer. Covalent attachment via an isopeptide bond to its substrates requires prior activation by the E1 complex sae1-sae2 and linkage to the E2 enzyme ube2i. This post-translational modification on lysine residues of proteins plays a crucial role in a number of cellular processes such as nuclear t…	0.99992
100812	-0.10524	4.94248	g6531	Sc4wPfr_878	797955	798743	sp|Q5R5E7|3HIDH_PONAB		0.65985
100815	-0.210928	3.50081	g6533	Sc4wPfr_878	814642	816321	sp|Q3TUA9|SG196_MOUSE	Protein O-mannose kinase that specifically mediates phosphorylation at the 6-position of an O-mannose of the trisaccharide (N-acetylgalactosamine (GalNAc)-beta-1,3-N-acetylglucosamine (GlcNAc)-beta-1,4-mannose) to generate phosphorylated O-mannosyl trisaccharide (N-acetylgalactosamine-beta-1,3-N-acetylglucosamine-beta-1,4-(phosphate-6-)mannose). Phosphorylated O-mannosyl trisaccharide is a carboh…	0.402547
100819	0.072253	5.65821	g6535	Sc4wPfr_878	879290	880698	sp|Q9W719|HPRT_CHICK	Converts guanine to guanosine monophosphate, and hypoxanthine to inosine monophosphate. Transfers the 5-phosphoribosyl group from 5-phosphoribosylpyrophosphate onto the purine. Plays a central role in the generation of purine nucleotides through the purine salvage pathway (By similarity).	0.712268
10082	0.0233633	5.5354	g17518	Sc4wPfr_1211	36822	38010			0.951549
100820	-0.117911	3.96095	g6536	Sc4wPfr_878	884505	885370			0.652809
10083	-0.481975	4.93755	g17518	Sc4wPfr_1211	39044	39957			0.0526296
100830	-0.0996795	3.71512	g6537	Sc4wPfr_878	931107	932309			0.715701
100835	0.254404	5.48755	g6538	Sc4wPfr_878	958613	959510			0.240293
100836	0.146878	5.19952	g6538	Sc4wPfr_878	959903	960836			0.616445
100837	0.115092	3.64037	g6538	Sc4wPfr_878	962094	962377			0.761237
100838	-0.0534351	4.34862	g6538	Sc4wPfr_878	963700	964284			0.90371
100839	0.13827	5.54107	g6538	Sc4wPfr_878	966314	967399			0.833716
10084	-0.0325693	6.70852	g17518	Sc4wPfr_1211	48064	49076			0.891918
100840	0.175986	5.51812	g6538	Sc4wPfr_878	967827	968824			0.496201
100844	0.12057	3.00368	g6538	Sc4wPfr_878	978915	979642			0.814404
10085	-0.199949	3.64426	g17518	Sc4wPfr_1211	53647	54549			0.385954
100852	0.0909453	3.78226	g6540	Sc4wPfr_878	1029140	1029867			0.82958
100853	-0.0885406	3.38937	g6540	Sc4wPfr_878	1035151	1037052			0.881521
100860	-0.0532229	5.16227	g6546	Sc4wPfr_878	1119651	1120873	sp|Q8K430|KLH17_RAT	Substrate-recognition component of some cullin-RING-based BCR (BTB-CUL3-RBX1) E3 ubiquitin-protein ligase complex. The BCR(KLHL17) mediates the ubiquitination and subsequenct degradation of GLUR6. May play a role in the actin-based neuronal function.	0.868362
100863	-0.244158	3.5243	g6547	Sc4wPfr_878	1131252	1132877			0.39161
100864	-0.306199	3.52742	g6547	Sc4wPfr_878	1134746	1136623			0.199819
100867	0.0172308	5.99469	g6547	Sc4wPfr_878	1155852	1156879			0.939686
100868	-0.0636711	4.80639	g6548	Sc4wPfr_878	1157560	1158296	sp|Q6ZQ89|MARH6_MOUSE	E3 ubiquitin-protein ligase that promotes 'Lys-48'-linked ubiquitination of target proteins, leading to their proteasomal degradation. Promotes ubiquitination of DIO2, leading to its degradation. Promotes ubiquitination of SQLE, leading to its degradation. E3 ubiquitin ligases accept ubiquitin from an E2 ubiquitin-conjugating enzyme in the form of a thioester and then directly transfer the ubiqui…	0.839081
100869	-0.548834	3.74381	g6548	Sc4wPfr_878	1159893	1160324	sp|Q6ZQ89|MARH6_MOUSE	E3 ubiquitin-protein ligase that promotes 'Lys-48'-linked ubiquitination of target proteins, leading to their proteasomal degradation. Promotes ubiquitination of DIO2, leading to its degradation. Promotes ubiquitination of SQLE, leading to its degradation. E3 ubiquitin ligases accept ubiquitin from an E2 ubiquitin-conjugating enzyme in the form of a thioester and then directly transfer the ubiqui…	6.31824e-05
100872	-0.160008	3.57915	g6549	Sc4wPfr_878	1189861	1190298	sp|Q9CYL5|GAPR1_MOUSE		0.639853
100874	0.0228896	4.64422	g6549	Sc4wPfr_878	1193957	1195841	sp|Q9CYL5|GAPR1_MOUSE		0.956089
100875	-0.0148527	5.1412	g6549	Sc4wPfr_878	1202064	1203749	sp|Q9CYL5|GAPR1_MOUSE		0.964111
100876	-0.0151862	3.9826	g6549	Sc4wPfr_878	1210684	1211375	sp|Q9CYL5|GAPR1_MOUSE		0.971037
100877	0.0527815	4.53538	g6549	Sc4wPfr_878	1216517	1217191	sp|Q9CYL5|GAPR1_MOUSE		0.860867
100879	0.422177	3.50112	g6550	Sc4wPfr_878	1223984	1225014			0.0751627
100882	0.0233919	5.15702	g6553	Sc4wPfr_878	1242288	1244208			0.942298
100883	-0.105115	3.37066	g6553	Sc4wPfr_878	1245816	1246047			0.773916
100886	-0.0541218	4.5511	g6554	Sc4wPfr_878	1262801	1264115			0.898504
100887	0.109171	5.48313	g6554	Sc4wPfr_878	1266370	1267259			0.634543
100888	-0.0218169	4.28692	g6554	Sc4wPfr_878	1267708	1268634			0.957347
100889	-0.152695	3.74138	g6554	Sc4wPfr_878	1273123	1273881			0.558608
100894	0.0412097	4.74072	g6556	Sc4wPfr_878	1397695	1399146			0.897574
10090	0.496334	3.65384	g17518	Sc4wPfr_1211	79292	81592			0.07229
100909	0.060089	4.37889	g6559	Sc4wPfr_878	1463948	1464871			0.832343
10091	-0.11035	4.36188		Sc4wPfr_1211.1	269	1773			0.686601
100915	0.727177	4.25369	g6562	Sc4wPfr_878	1557207	1558637			2.20062e-05
100916	-0.0118025	3.34341	g6562	Sc4wPfr_878	1568383	1569055			0.985461
100928	0.138905	3.4039	g6563	Sc4wPfr_878	1629107	1630786	sp|Q8R3S2|TSN33_MOUSE	Plays an important role in normal erythropoiesis (PubMed:17158226). It has a role in the differentiation of erythroid progenitors (PubMed:17158226). Regulates maturation and trafficking of the transmembrane metalloprotease ADAM10 (PubMed:23035126, PubMed:30463011). Negatively regulates ligand-induced Notch activity probably by regulating ADAM10 activity (By similarity). Mediates docking of ADAM10…	0.666196
100935	0.133872	4.60653	g6566	Sc4wPfr_878	1804354	1805530	sp|Q9DEI1|PRKDC_XENLA	Serine/threonine-protein kinase that acts as a molecular sensor for DNA damage. Involved in DNA nonhomologous end joining (NHEJ) required for double-strand break (DSB) repair and V(D)J recombination. Must be bound to DNA to express its catalytic properties. Promotes processing of hairpin DNA structures in V(D)J recombination by activation of the hairpin endonuclease artemis (DCLRE1C). The assembl…	0.531667
100941	-0.0313324	4.1248	g6566	Sc4wPfr_878	1829348	1830158	sp|Q9DEI1|PRKDC_XENLA	Serine/threonine-protein kinase that acts as a molecular sensor for DNA damage. Involved in DNA nonhomologous end joining (NHEJ) required for double-strand break (DSB) repair and V(D)J recombination. Must be bound to DNA to express its catalytic properties. Promotes processing of hairpin DNA structures in V(D)J recombination by activation of the hairpin endonuclease artemis (DCLRE1C). The assembl…	0.939441
100943	0.0243113	4.86208	g6567	Sc4wPfr_878	1844252	1845127	sp|Q6UE39|GLT13_RAT	Catalyzes the initial reaction in O-linked oligosaccharide biosynthesis, the transfer of an N-acetyl-D-galactosamine residue to a serine or threonine residue on the protein receptor. Has a much stronger activity than GALNT1 to transfer GalNAc to mucin peptides, such as Muc5Ac and Muc7. Able to glycosylate SDC3. May be responsible for the synthesis of Tn antigen in neuronal cells (By similarity).	0.952969
100944	-0.447765	3.91374	g6567	Sc4wPfr_878	1848103	1848805	sp|Q6UE39|GLT13_RAT	Catalyzes the initial reaction in O-linked oligosaccharide biosynthesis, the transfer of an N-acetyl-D-galactosamine residue to a serine or threonine residue on the protein receptor. Has a much stronger activity than GALNT1 to transfer GalNAc to mucin peptides, such as Muc5Ac and Muc7. Able to glycosylate SDC3. May be responsible for the synthesis of Tn antigen in neuronal cells (By similarity).	0.00334483
100945	0.0622198	4.81859	g6567	Sc4wPfr_878	1849069	1849762	sp|Q6UE39|GLT13_RAT	Catalyzes the initial reaction in O-linked oligosaccharide biosynthesis, the transfer of an N-acetyl-D-galactosamine residue to a serine or threonine residue on the protein receptor. Has a much stronger activity than GALNT1 to transfer GalNAc to mucin peptides, such as Muc5Ac and Muc7. Able to glycosylate SDC3. May be responsible for the synthesis of Tn antigen in neuronal cells (By similarity).	0.823202
100947	0.0713167	3.67669	g6567	Sc4wPfr_878	1870036	1870572	sp|Q6UE39|GLT13_RAT	Catalyzes the initial reaction in O-linked oligosaccharide biosynthesis, the transfer of an N-acetyl-D-galactosamine residue to a serine or threonine residue on the protein receptor. Has a much stronger activity than GALNT1 to transfer GalNAc to mucin peptides, such as Muc5Ac and Muc7. Able to glycosylate SDC3. May be responsible for the synthesis of Tn antigen in neuronal cells (By similarity).	0.868418
100956	0.040906	3.70161	g6570	Sc4wPfr_878	1909405	1910579			0.93105
100961	0.00684396	3.66716	g734	Sc4wPfr_879	37023	38043	sp|Q8VHI4|CARTF_MOUSE	Acts as a transcriptional activator that mediates the calcium- and neuron-selective induction of BDNF exon III transcription. Binds to the consensus calcium-response element CaRE1 5'-CTATTTCGAG-3' sequence (By similarity).	0.992178
100966	0.114836	3.38288	g735	Sc4wPfr_879	58983	60800			0.798045
100971	0.0358571	5.56723	g19242	Sc4wPfr_880	4013	4605			0.917859
100975	0.085941	5.07543	g1649	Sc4wPfr_881	47586	48531	sp|Q9GNN8|CTXA_CARAL	Has potent hemolytic activity. Is lethal to crayfish. Causes cutaneous inflammation in humans. May act as a pore-forming toxin, disrupting normal transmembrane ion concentration gradients in susceptible cells.	0.777138
100978	0.00246438	4.21281	g1649	Sc4wPfr_881	118247	119525	sp|Q9GNN8|CTXA_CARAL	Has potent hemolytic activity. Is lethal to crayfish. Causes cutaneous inflammation in humans. May act as a pore-forming toxin, disrupting normal transmembrane ion concentration gradients in susceptible cells.	0.995861
100979	-0.13711	4.06819	g1651	Sc4wPfr_881	160450	161589	sp|Q9D531|NXNL2_MOUSE	May be involved in the maintenance of both the function and the viability of sensory neurons, including photoreceptors and olfactory neurons. In the retina, isoform 1 may be required for rod function and isoform 2 for cone viability and function.	0.667044
100986	0.0211446	2.7523	g1652	Sc4wPfr_881	201605	202332			0.981031
100987	0.240408	4.10599	g1652	Sc4wPfr_881	202784	203355			0.303531
100989	0.271276	3.28262	g1652	Sc4wPfr_881	209058	210523			0.347575
10099	0.0429678	6.38791	g1084	Sc4wPfr_1213	22726	23690	sp|P28021|CSK2B_XENLA	Participates in Wnt signaling. Plays a complex role in regulating the basal catalytic activity of the alpha subunit (By similarity).	0.86338
100993	0.246327	5.29516	g1654	Sc4wPfr_881	236789	237522			0.141527
100994	-0.136395	3.74962	g1654	Sc4wPfr_881	237685	238334			0.646652
100995	0.0763324	5.73709	g1654	Sc4wPfr_881	238676	239839			0.744626
100998	0.0758797	3.48197	g1654	Sc4wPfr_881	245959	246768			0.850917
101	0.626405	3.62801	g18881	Sc4wPfr_10	331617	332236			0.000356714
1010	-0.0930082	4.55052	g13514	Sc4wPfr_1010	245052	248039	sp|Q9BX10|GTPB2_HUMAN		0.842779
10100	0.00204466	3.55882	g1084	Sc4wPfr_1213	34205	36896	sp|P28021|CSK2B_XENLA	Participates in Wnt signaling. Plays a complex role in regulating the basal catalytic activity of the alpha subunit (By similarity).	0.996413
101001	0.0322753	3.19548	g1655	Sc4wPfr_881	267610	268847	sp|Q9D531|NXNL2_MOUSE	May be involved in the maintenance of both the function and the viability of sensory neurons, including photoreceptors and olfactory neurons. In the retina, isoform 1 may be required for rod function and isoform 2 for cone viability and function.	0.96323
101002	0.00706873	6.35709	g1656	Sc4wPfr_881	277132	278419	sp|Q9D531|NXNL2_MOUSE	May be involved in the maintenance of both the function and the viability of sensory neurons, including photoreceptors and olfactory neurons. In the retina, isoform 1 may be required for rod function and isoform 2 for cone viability and function.	0.975105
101004	-0.137189	4.71213	g1656	Sc4wPfr_881	299618	300879	sp|Q9D531|NXNL2_MOUSE	May be involved in the maintenance of both the function and the viability of sensory neurons, including photoreceptors and olfactory neurons. In the retina, isoform 1 may be required for rod function and isoform 2 for cone viability and function.	0.539138
101006	-0.0113177	5.11529	g1657	Sc4wPfr_881	312506	313057	sp|Q5R4W3|DPOE3_PONAB	Forms a complex with DNA polymerase epsilon subunit CHRAC1 and binds naked DNA, which is then incorporated into chromatin, aided by the nucleosome-remodeling activity of ISWI/SNF2H and ACF1.	0.97224
101007	-0.562834	2.93822	g1657	Sc4wPfr_881	317383	317782	sp|Q5R4W3|DPOE3_PONAB	Forms a complex with DNA polymerase epsilon subunit CHRAC1 and binds naked DNA, which is then incorporated into chromatin, aided by the nucleosome-remodeling activity of ISWI/SNF2H and ACF1.	0.0262464
101008	-0.220795	3.46857	g1659	Sc4wPfr_881	331638	332409			0.363376
101010	0.0102738	5.5786	g1660	Sc4wPfr_881	342310	343504	sp|P04574|CPNS1_PIG	Regulatory subunit of the calcium-regulated non-lysosomal thiol-protease which catalyzes limited proteolysis of substrates involved in cytoskeletal remodeling and signal transduction.	0.979055
101012	0.383602	3.48984	g1661	Sc4wPfr_881	352788	353402			0.0690968
101018	-0.220943	4.35483	g1667	Sc4wPfr_881	391265	394154	sp|C9J069|CI172_HUMAN	May be involved in the control of adherens junction integrity.	0.236098
101020	0.0170877	4.5776	g1667	Sc4wPfr_881	400728	401141	sp|C9J069|CI172_HUMAN	May be involved in the control of adherens junction integrity.	0.968127
101021	0.102819	6.6143	g1667	Sc4wPfr_881	401494	403733	sp|C9J069|CI172_HUMAN	May be involved in the control of adherens junction integrity.	0.374139
101022	-0.0707393	4.39224	g1667	Sc4wPfr_881	404016	404438	sp|C9J069|CI172_HUMAN	May be involved in the control of adherens junction integrity.	0.839055
101023	-0.596464	3.07654	g1667	Sc4wPfr_881	404693	404903	sp|C9J069|CI172_HUMAN	May be involved in the control of adherens junction integrity.	0.0376737
101024	0.0696704	5.15956	g1668	Sc4wPfr_881	409662	410948	sp|Q94K49|ALP1_ARATH	Transposase-derived protein that may have nuclease activity (Probable). Antagonist of polycomb-group (PcG) protein-mediated chromatin silencing, probably by preventing the association of POLYCOMB REPRESSIVE COMPLEX 2 (PRC2) with its accessory components. Needed for full reactivation of several floral homeotic genes that are repressed by PcG (PubMed:26642436).	0.827646
101027	0.0235568	5.99983	g1669	Sc4wPfr_881	422232	423265	sp|Q4VC17|ATS18_MOUSE		0.925732
101029	-0.0438665	3.95525	g1670	Sc4wPfr_881	450458	451109			0.919604
101032	0.0294261	3.45269	g1670	Sc4wPfr_881	458196	459368			0.955865
101038	0.11755	4.11681	g1671	Sc4wPfr_881	474642	475170			0.664724
10104	-0.0789084	3.17073	g1086	Sc4wPfr_1213	57818	58324	sp|Q640L5|CCD18_MOUSE		0.883411
101041	0.238866	4.42774	g1672	Sc4wPfr_881	493042	493827	sp|Q8IFN0|YD115_PLAF7		0.29781
101043	0.0180096	4.40744	g1672	Sc4wPfr_881	502754	503877	sp|Q8IFN0|YD115_PLAF7		0.96294
101046	-0.0393935	3.66125	g1673	Sc4wPfr_881	523983	525589	sp|D3YXG0|HMCN1_MOUSE	Promotes cleavage furrow maturation during cytokinesis in preimplantation embryos (PubMed:21215633). May play a role in the architecture of adhesive and flexible epithelial cell junctions (PubMed:17015624). May play a role during myocardial remodeling by imparting an effect on cardiac fibroblast migration (PubMed:24951538).	0.924478
101047	-0.0729486	4.03979	g1673	Sc4wPfr_881	530102	530955	sp|D3YXG0|HMCN1_MOUSE	Promotes cleavage furrow maturation during cytokinesis in preimplantation embryos (PubMed:21215633). May play a role in the architecture of adhesive and flexible epithelial cell junctions (PubMed:17015624). May play a role during myocardial remodeling by imparting an effect on cardiac fibroblast migration (PubMed:24951538).	0.867911
10105	-0.299463	4.39281	g1086	Sc4wPfr_1213	59920	60880	sp|Q640L5|CCD18_MOUSE		0.11869
101053	0.0260494	3.76734	g1674	Sc4wPfr_881	596024	598541	sp|Q6NRG5|NDOR1_XENLA	Component of the cytosolic iron-sulfur (Fe-S) protein assembly (CIA) machinery. Required for the maturation of extramitochondrial Fe-S proteins. Part of an electron transfer chain functioning in an early step of cytosolic Fe-S biogenesis. Transfers electrons from NADPH to the Fe/S cluster of ciapin1.	0.952954
101054	-0.0167921	5.64041	g1677	Sc4wPfr_881	657399	658342	sp|Q6PFP6|NDOR1_DANRE	Component of the cytosolic iron-sulfur (Fe-S) protein assembly (CIA) machinery. Required for the maturation of extramitochondrial Fe-S proteins. Part of an electron transfer chain functioning in an early step of cytosolic Fe-S biogenesis. Transfers electrons from NADPH to the Fe/S cluster of ciapin1.	0.953118
101056	-0.0243274	5.47267	g1678	Sc4wPfr_881	664972	665671			0.914955
101059	-0.0557927	3.46942	g15577	Sc4wPfr_881.1	4621	5311			0.893593
101069	-0.119332	4.77769	g15578	Sc4wPfr_881.1	163245	164649			0.570412
101071	-0.0486821	3.91707	g15580	Sc4wPfr_881.1	191204	191727			0.900333
101074	0.0992492	4.6185	g15580	Sc4wPfr_881.1	217828	219894			0.686873
101075	-0.101652	4.34089	g15580	Sc4wPfr_881.1	223820	224473			0.686553
101078	-0.0169341	6.33238	g12824	Sc4wPfr_882	2710	3983	sp|Q80TC5|POGK_MOUSE		0.94195
101079	0.0679044	4.86494	g12824	Sc4wPfr_882	4259	4659	sp|Q80TC5|POGK_MOUSE		0.78943
101080	-0.00752994	3.77732	g12824	Sc4wPfr_882	5810	6108	sp|Q80TC5|POGK_MOUSE		0.988281
101081	0.155427	4.14037	g12826	Sc4wPfr_882	12209	13035			0.571516
101082	-0.151336	4.30237	g12829	Sc4wPfr_882	23091	24609			0.416143
101085	-0.137714	3.73229	g12831	Sc4wPfr_882	79058	79900			0.637193
101086	-0.329055	4.36478	g12831	Sc4wPfr_882	81590	82274			0.0503965
10109	-0.116907	3.99554	g1087	Sc4wPfr_1213	88753	89062			0.718479
101108	-0.106301	3.56925	g19956	Sc4wPfr_882.1	30679	31505	sp|Q8IY21|DDX60_HUMAN	Positively regulates DDX58/RIG-I- and IFIH1/MDA5-dependent type I interferon and interferon inducible gene expression in response to viral infection. Binds ssRNA, dsRNA and dsDNA and can promote the binding of DDX58/RIG-I to dsRNA. Exhibits antiviral activity against hepatitis C virus and vesicular stomatitis virus (VSV).	0.818801
101115	-0.00390565	3.61057	g19956	Sc4wPfr_882.1	97404	98672	sp|Q8IY21|DDX60_HUMAN	Positively regulates DDX58/RIG-I- and IFIH1/MDA5-dependent type I interferon and interferon inducible gene expression in response to viral infection. Binds ssRNA, dsRNA and dsDNA and can promote the binding of DDX58/RIG-I to dsRNA. Exhibits antiviral activity against hepatitis C virus and vesicular stomatitis virus (VSV).	0.993936
101119	-0.00113209	5.57688	g19956	Sc4wPfr_882.1	162565	163586	sp|Q8IY21|DDX60_HUMAN	Positively regulates DDX58/RIG-I- and IFIH1/MDA5-dependent type I interferon and interferon inducible gene expression in response to viral infection. Binds ssRNA, dsRNA and dsDNA and can promote the binding of DDX58/RIG-I to dsRNA. Exhibits antiviral activity against hepatitis C virus and vesicular stomatitis virus (VSV).	0.997302
101126	-0.0302281	3.44954	g19958	Sc4wPfr_882.1	250634	251317	sp|Q8IY21|DDX60_HUMAN	Positively regulates DDX58/RIG-I- and IFIH1/MDA5-dependent type I interferon and interferon inducible gene expression in response to viral infection. Binds ssRNA, dsRNA and dsDNA and can promote the binding of DDX58/RIG-I to dsRNA. Exhibits antiviral activity against hepatitis C virus and vesicular stomatitis virus (VSV).	0.962553
101131	-0.0406764	5.38531	g9136	Sc4wPfr_882.2	73911	74634	sp|Q5HZE0|MCATL_RAT	Transports arginine, lysine, homoarginine, methylarginine and, to a much lesser extent, ornithine and histidine. Can restore ornithine transport in cells lacking the primary mitochondrial ornithine transporter SLC25A15. Does not transport carnitine nor acylcarnitines. Functions by both counter-exchange and uniport mechanisms.	0.909088
101133	0.108725	4.33524	g9136	Sc4wPfr_882.2	83566	84525	sp|Q5HZE0|MCATL_RAT	Transports arginine, lysine, homoarginine, methylarginine and, to a much lesser extent, ornithine and histidine. Can restore ornithine transport in cells lacking the primary mitochondrial ornithine transporter SLC25A15. Does not transport carnitine nor acylcarnitines. Functions by both counter-exchange and uniport mechanisms.	0.720882
101134	0.0510328	3.35377	g9136	Sc4wPfr_882.2	84720	85375	sp|Q5HZE0|MCATL_RAT	Transports arginine, lysine, homoarginine, methylarginine and, to a much lesser extent, ornithine and histidine. Can restore ornithine transport in cells lacking the primary mitochondrial ornithine transporter SLC25A15. Does not transport carnitine nor acylcarnitines. Functions by both counter-exchange and uniport mechanisms.	0.937914
101138	-0.184671	4.28265	g9138	Sc4wPfr_882.2	118336	119536	sp|Q9QXA6|BAT1_MOUSE	Involved in the high-affinity, sodium-independent transport of cystine and neutral and dibasic amino acids (system B(0,+)-like activity). Thought to be responsible for the high-affinity reabsorption of cystine in the kidney proximal tubule.	0.387649
101144	-0.0634962	6.44139	g9138	Sc4wPfr_882.2	148516	149534	sp|Q9QXA6|BAT1_MOUSE	Involved in the high-affinity, sodium-independent transport of cystine and neutral and dibasic amino acids (system B(0,+)-like activity). Thought to be responsible for the high-affinity reabsorption of cystine in the kidney proximal tubule.	0.691078
101145	-0.046679	4.91292	g9138	Sc4wPfr_882.2	152888	153603	sp|Q9QXA6|BAT1_MOUSE	Involved in the high-affinity, sodium-independent transport of cystine and neutral and dibasic amino acids (system B(0,+)-like activity). Thought to be responsible for the high-affinity reabsorption of cystine in the kidney proximal tubule.	0.888799
101149	-0.0141364	5.3628	g9139	Sc4wPfr_882.2	170053	170663	sp|Q8BGF3|WDR92_MOUSE	Seems to act as a modulator of apoptosis.	0.962717
101154	-0.00485093	4.51642	g9144	Sc4wPfr_882.2	230183	230985	sp|P51949|MAT1_MOUSE	Stabilizes the cyclin H-CDK7 complex to form a functional CDK-activating kinase (CAK) enzymatic complex. CAK activates the cyclin-associated kinases CDK1, CDK2, CDK4 and CDK6 by threonine phosphorylation. CAK complexed to the core-TFIIH basal transcription factor activates RNA polymerase II by serine phosphorylation of the repetitive C-terminal domain (CTD) of its large subunit (POLR2A), allowing…	0.990969
101166	-0.120161	3.7974	g9162	Sc4wPfr_882.2	309218	309817			0.764369
101167	-0.00537834	5.41364	g9161	Sc4wPfr_882.2	314281	315304			0.988934
101174	-0.0165892	4.27172	g7183	Sc4wPfr_883.1	9868	10761			0.962717
101177	-0.00106501	4.57324	g7184	Sc4wPfr_883.1	63008	63362			0.997926
101178	0.0124215	6.06734	g7184	Sc4wPfr_883.1	65928	67289			0.957906
10118	0.0213558	6.53502	g1089	Sc4wPfr_1213	121553	123415	sp|Q60547|SYCP3_MESAU	Component of the synaptonemal complexes (SCS), formed between homologous chromosomes during meiotic prophase (PubMed:7876343). Required for centromere pairing during meiosis in male germ cells. Required for normal meiosis during spermatogenesis and male fertility. Plays a lesser role in female fertility. Required for efficient phosphorylation of HORMAD1 and HORMAD2.	0.937914
101186	-0.510242	3.29183	g31948	Sc4wPfr_884	47939	48615	sp|Q6GPQ3|MFSD8_XENLA	May be a carrier that transport small solutes by using chemiosmotic ion gradients.	0.00697686
101187	-0.237833	6.50504	g31949	Sc4wPfr_884	62481	63392			0.0277079
101188	-0.487802	6.67927	g31949	Sc4wPfr_884	65257	66620			1.41126e-07
101189	-1.5208	2.98244	g31949	Sc4wPfr_884	67134	67354			3.03784e-09
101190	-0.273813	5.13749	g31949	Sc4wPfr_884	69082	69932			0.0328658
101192	-0.569395	3.50357	g31949	Sc4wPfr_884	70926	71555			0.000889897
101195	-3.81619	2.74195	g31950	Sc4wPfr_884	104552	104880			1.97805e-14
101197	0.0518492	4.54055	g31950	Sc4wPfr_884	117360	118478			0.874584
101199	-1.62807	4.86075	g31950	Sc4wPfr_884	131121	133194			1.0375e-10
101207	0.0318357	4.24889	g31952	Sc4wPfr_884	195443	196076			0.95126
101212	-0.876676	4.59734	g31953	Sc4wPfr_884	214745	216146			8.22835e-09
101213	0.0565804	6.36011	g31953	Sc4wPfr_884	227130	228409			0.783176
101215	-0.214649	5.38667	g31953	Sc4wPfr_884	237537	239165			0.0821421
101218	-1.19843	2.6076	g31953	Sc4wPfr_884	249589	250626			0.000112097
10122	-0.382482	4.85077	g1090	Sc4wPfr_1213	153859	155462	sp|Q9BY11|PACN1_HUMAN	Plays a role in the reorganization of the microtubule cytoskeleton via its interaction with MAPT; this decreases microtubule stability and inhibits MAPT-induced microtubule polymerization. Plays a role in cellular transport processes by recruiting DNM1, DNM2 and DNM3 to membranes. Plays a role in the reorganization of the actin cytoskeleton and in neuron morphogenesis via its interaction with COB…	0.0018498
101220	-0.243699	3.62468	g31954	Sc4wPfr_884	255721	256160	sp|P42583|NKX25_XENLA	Implicated in commitment to and/or differentiation of the myocardial lineage. May regulate the expression of genes involved in cardiogenesis and play a role in the formation of gut and the pharyngeal region. Binds to the core DNA motif of promoter.	0.278889
101221	-0.530679	4.14021	g31954	Sc4wPfr_884	257913	258903	sp|P42583|NKX25_XENLA	Implicated in commitment to and/or differentiation of the myocardial lineage. May regulate the expression of genes involved in cardiogenesis and play a role in the formation of gut and the pharyngeal region. Binds to the core DNA motif of promoter.	0.00110336
101222	-0.119345	4.2997	g31954	Sc4wPfr_884	259508	260035	sp|P42583|NKX25_XENLA	Implicated in commitment to and/or differentiation of the myocardial lineage. May regulate the expression of genes involved in cardiogenesis and play a role in the formation of gut and the pharyngeal region. Binds to the core DNA motif of promoter.	0.687008
101226	-0.172459	3.46737	g31954	Sc4wPfr_884	263807	264211	sp|P42583|NKX25_XENLA	Implicated in commitment to and/or differentiation of the myocardial lineage. May regulate the expression of genes involved in cardiogenesis and play a role in the formation of gut and the pharyngeal region. Binds to the core DNA motif of promoter.	0.525786
101230	-0.276772	5.26558	g31954	Sc4wPfr_884	268860	269902	sp|P42583|NKX25_XENLA	Implicated in commitment to and/or differentiation of the myocardial lineage. May regulate the expression of genes involved in cardiogenesis and play a role in the formation of gut and the pharyngeal region. Binds to the core DNA motif of promoter.	0.0446723
101237	-0.000820515	4.16574	g31956	Sc4wPfr_884	321583	322086			0.998681
10124	-0.689348	3.42946	g1092	Sc4wPfr_1213	161023	161965			0.000109451
101245	-0.0432383	5.83257	g31958	Sc4wPfr_884	395186	396246			0.964151
101246	0.468231	5.54027	g31958	Sc4wPfr_884	396527	397757			0.688572
101247	0.061788	5.56477	g31958	Sc4wPfr_884	399357	399992			0.942559
101248	0.124477	6.2322	g31959	Sc4wPfr_884	403128	403840			0.770583
101249	0.489215	6.58831	g31959	Sc4wPfr_884	405119	407410			0.57879
10125	-0.0925702	4.59737	g1093	Sc4wPfr_1213	166134	166948	sp|Q9XSJ0|UCHL5_BOVIN	Protease that specifically cleaves 'Lys-48'-linked polyubiquitin chains. Deubiquitinating enzyme associated with the 19S regulatory subunit of the 26S proteasome. Putative regulatory component of the INO80 complex; however is inactive in the INO80 complex and is activated by a transient interaction of the INO80 complex with the proteasome via ADRM1 (By similarity).	0.644143
101251	0.122595	3.02648	g31959	Sc4wPfr_884	415427	415665			0.853992
101252	0.0547274	4.88271	g31959	Sc4wPfr_884	416260	417159			0.93864
101253	-0.144167	3.23137	g31959	Sc4wPfr_884	418508	418875			0.824204
10126	-0.204313	4.53102	g1095	Sc4wPfr_1213	206122	206634	sp|Q9WUP7|UCHL5_MOUSE	Protease that specifically cleaves 'Lys-48'-linked polyubiquitin chains. Deubiquitinating enzyme associated with the 19S regulatory subunit of the 26S proteasome. Putative regulatory component of the INO80 complex; however is inactive in the INO80 complex and is activated by a transient interaction of the INO80 complex with the proteasome via ADRM1 (By similarity).	0.355012
101264	0.298209	3.24662	g9485	Sc4wPfr_885	37958	39324			0.204441
101269	0.025208	4.2582	g9487	Sc4wPfr_885	106291	107392			0.951907
10127	0.00287341	5.86305	g1096	Sc4wPfr_1213	208116	208985	sp|Q63429|UBC_RAT	Ubiquitin: Exists either covalently attached to another protein, or free (unanchored). When covalently bound, it is conjugated to target proteins via an isopeptide bond either as a monomer (monoubiquitin), a polymer linked via different Lys residues of the ubiquitin (polyubiquitin chains) or a linear polymer linked via the initiator Met of the ubiquitin (linear polyubiquitin chains). Polyubiquiti…	0.992509
10128	0.100255	4.6331	g1096	Sc4wPfr_1213	209392	209621	sp|Q63429|UBC_RAT	Ubiquitin: Exists either covalently attached to another protein, or free (unanchored). When covalently bound, it is conjugated to target proteins via an isopeptide bond either as a monomer (monoubiquitin), a polymer linked via different Lys residues of the ubiquitin (polyubiquitin chains) or a linear polymer linked via the initiator Met of the ubiquitin (linear polyubiquitin chains). Polyubiquiti…	0.666678
10129	-0.0879144	7.65489	g1096	Sc4wPfr_1213	211453	213801	sp|Q63429|UBC_RAT	Ubiquitin: Exists either covalently attached to another protein, or free (unanchored). When covalently bound, it is conjugated to target proteins via an isopeptide bond either as a monomer (monoubiquitin), a polymer linked via different Lys residues of the ubiquitin (polyubiquitin chains) or a linear polymer linked via the initiator Met of the ubiquitin (linear polyubiquitin chains). Polyubiquiti…	0.66586
101292	0.25216	3.25311	g9490	Sc4wPfr_885	267707	268836			0.463007
101300	0.216218	3.93717	g9491	Sc4wPfr_885	323679	325067			0.226023
10131	-0.0433115	5.23823	g1097	Sc4wPfr_1213	225346	225970			0.84764
101312	0.501182	3.95821	g9494	Sc4wPfr_885	414054	416173			0.00235502
101313	-0.210283	3.87715	g9496	Sc4wPfr_885	435063	435678			0.316304
101315	-0.0265187	3.90001	g9509	Sc4wPfr_885	463448	464556			0.946786
101322	0.0095247	4.53429	g9510	Sc4wPfr_885	514064	514409	sp|O88484|PDP2_RAT	Catalyzes the dephosphorylation and concomitant reactivation of the alpha subunit of the E1 component of the pyruvate dehydrogenase complex.	0.985461
101323	0.0179693	5.50669	g9510	Sc4wPfr_885	516340	517035	sp|O88484|PDP2_RAT	Catalyzes the dephosphorylation and concomitant reactivation of the alpha subunit of the E1 component of the pyruvate dehydrogenase complex.	0.945415
101324	0.201012	3.39975	g9510	Sc4wPfr_885	518820	519190	sp|O88484|PDP2_RAT	Catalyzes the dephosphorylation and concomitant reactivation of the alpha subunit of the E1 component of the pyruvate dehydrogenase complex.	0.621523
101330	0.148405	3.43781	g9510	Sc4wPfr_885	542565	544191	sp|O88484|PDP2_RAT	Catalyzes the dephosphorylation and concomitant reactivation of the alpha subunit of the E1 component of the pyruvate dehydrogenase complex.	0.645855
101331	-0.0216158	5.20981	g9511	Sc4wPfr_885	550297	551437			0.937914
101332	0.16301	3.51031	g9511	Sc4wPfr_885	552022	552359			0.548312
101333	-0.238684	3.74625	g9512	Sc4wPfr_885	571228	572133			0.28625
101335	0.0911072	3.35073	g9512	Sc4wPfr_885	594316	594917			0.813349
101336	0.146093	4.97502	g9512	Sc4wPfr_885	596585	597816			0.437949
101339	-0.0750119	5.24717	g29503	Sc4wPfr_886	11420	12157	sp|Q8BGX0|TRI23_MOUSE	Acts as an E3 ubiquitin-protein ligase. Plays an essential role in autophagy activation during viral infection. Mechanistically, activates TANK-binding kinase 1/TBK1 by facilitating its dimerization and ability to phosphorylate the selective autophagy receptor SQSTM1. In order to achieve this function, TRIM23 mediates 'Lys-27'-linked auto-ubiquitination of its ADP-ribosylation factor (ARF) domain…	0.728324
101353	0.0872635	5.24534	g29504	Sc4wPfr_886	88881	89658	sp|Q9DE26|RUVB1_XENLA	Has single-stranded DNA-stimulated ATPase and ATP-dependent DNA helicase (3' to 5') activity suggesting a role in nuclear processes such as recombination and transcription.	0.725543
101355	-0.0655919	4.98909	g29507	Sc4wPfr_886	114242	115650	sp|Q0IJ05|OSBL9_XENTR		0.818209
101359	-0.030889	4.55181	g29507	Sc4wPfr_886	137945	138968	sp|Q0IJ05|OSBL9_XENTR		0.948342
101360	-0.303593	3.50358	g29507	Sc4wPfr_886	139144	139649	sp|Q0IJ05|OSBL9_XENTR		0.200806
101362	0.0103507	3.62377	g29507	Sc4wPfr_886	146323	146872	sp|Q0IJ05|OSBL9_XENTR		0.987364
101363	-0.269131	4.44276	g29507	Sc4wPfr_886	147986	149366	sp|Q0IJ05|OSBL9_XENTR		0.0814856
101366	-0.105023	3.39397	g29508	Sc4wPfr_886	172347	173530			0.776338
101370	-0.0745683	5.3977	g29508	Sc4wPfr_886	231210	232124			0.705225
101371	0.0756011	5.58723	g29508	Sc4wPfr_886	237984	238529			0.764572
101372	0.0955948	4.34305	g29508	Sc4wPfr_886	239389	239856			0.810879
101374	0.000415057	3.91747	g29508	Sc4wPfr_886	248320	250036			0.99906
101379	0.133356	4.65315	g29509	Sc4wPfr_886	269172	270355	sp|Q9H5L6|THAP9_HUMAN	Active transposase that specifically recognizes the bipartite 5'-TXXGGGX(A/T)-3' consensus motif and mediates transposition.	0.563817
101386	-0.104274	4.72039	g29510	Sc4wPfr_886	305200	305471	sp|Q5ZHY5|CHIP_CHICK	E3 ubiquitin-protein ligase which targets misfolded chaperone substrates towards proteasomal degradation. Ubiquitinates NOS1 in concert with Hsp70 and Hsp40. Mediates polyubiquitination of DNA polymerase beta (POLB), thereby playing a role in base-excision repair: catalyzes polyubiquitination by amplifying the HUWE1/ARF-BP1-dependent monoubiquitination and leading to POLB-degradation by the prote…	0.681593
101388	-0.146911	3.49738	g29510	Sc4wPfr_886	336792	337364	sp|Q5ZHY5|CHIP_CHICK	E3 ubiquitin-protein ligase which targets misfolded chaperone substrates towards proteasomal degradation. Ubiquitinates NOS1 in concert with Hsp70 and Hsp40. Mediates polyubiquitination of DNA polymerase beta (POLB), thereby playing a role in base-excision repair: catalyzes polyubiquitination by amplifying the HUWE1/ARF-BP1-dependent monoubiquitination and leading to POLB-degradation by the prote…	0.654001
101392	0.0422573	5.43018	g29513	Sc4wPfr_886	369110	370989			0.899016
101395	0.043515	4.71969	g29516	Sc4wPfr_886	385732	386544	sp|Q9UNE7|CHIP_HUMAN	E3 ubiquitin-protein ligase which targets misfolded chaperone substrates towards proteasomal degradation. Collaborates with ATXN3 in the degradation of misfolded chaperone substrates: ATXN3 restricting the length of ubiquitin chain attached to STUB1/CHIP substrates and preventing further chain extension. Ubiquitinates NOS1 in concert with Hsp70 and Hsp40. Modulates the activity of several chapero…	0.891313
101397	-0.10047	4.71262	g29517	Sc4wPfr_886	402648	403226			0.694585
101399	-0.275141	4.44082	g29518	Sc4wPfr_886	413550	414180	sp|P28221|5HT1D_HUMAN	G-protein coupled receptor for 5-hydroxytryptamine (serotonin). Also functions as a receptor for ergot alkaloid derivatives, various anxiolytic and antidepressant drugs and other psychoactive substances. Ligand binding causes a conformation change that triggers signaling via guanine nucleotide-binding proteins (G proteins) and modulates the activity of down-stream effectors, such as adenylate cyc…	0.310966
101412	0.0958036	4.50398	g29520	Sc4wPfr_886	494732	495309	sp|Q09422|PGAM5_CAEEL	Displays phosphatase activity for serine/threonine residues. Has apparently no phosphoglycerate mutase activity (By similarity).	0.716401
101421	-0.0289059	5.50777	g29525	Sc4wPfr_886	574626	575889	sp|Q8N0X4|CLYBL_HUMAN	Mitochondrial citramalyl-CoA lyase indirectly involved in the vitamin B12 metabolism (PubMed:29056341). Converts citramalyl-CoA into acetyl-CoA and pyruvate in the C5-dicarboxylate catabolism pathway (PubMed:29056341). The C5-dicarboxylate catabolism pathway is required to detoxify itaconate, a vitamin B12-poisoning metabolite (PubMed:29056341). Also acts as a malate synthase in vitro, converting…	0.910266
101422	-0.163692	6.51101	g29525	Sc4wPfr_886	583522	585387	sp|Q8N0X4|CLYBL_HUMAN	Mitochondrial citramalyl-CoA lyase indirectly involved in the vitamin B12 metabolism (PubMed:29056341). Converts citramalyl-CoA into acetyl-CoA and pyruvate in the C5-dicarboxylate catabolism pathway (PubMed:29056341). The C5-dicarboxylate catabolism pathway is required to detoxify itaconate, a vitamin B12-poisoning metabolite (PubMed:29056341). Also acts as a malate synthase in vitro, converting…	0.0754152
101423	0.0210886	3.27943	g29526	Sc4wPfr_886	592219	592723			0.977735
101424	-0.0490397	4.05611	g29526	Sc4wPfr_886	599894	601689			0.90956
101425	-0.16136	3.3672	g29527	Sc4wPfr_886	605955	606639	sp|Q8VE97|SRSF4_MOUSE	Plays a role in alternative splice site selection during pre-mRNA splicing. Represses the splicing of MAPT/Tau exon 10 (By similarity).	0.645849
101426	0.000357023	4.55547	g29527	Sc4wPfr_886	607642	608817	sp|Q8VE97|SRSF4_MOUSE	Plays a role in alternative splice site selection during pre-mRNA splicing. Represses the splicing of MAPT/Tau exon 10 (By similarity).	0.999154
101427	-0.0700619	5.31621	g29527	Sc4wPfr_886	619041	619839	sp|Q8VE97|SRSF4_MOUSE	Plays a role in alternative splice site selection during pre-mRNA splicing. Represses the splicing of MAPT/Tau exon 10 (By similarity).	0.782948
101431	0.117903	4.9158	g29532	Sc4wPfr_886	646443	647390			0.535639
101433	0.0375112	4.24244	g29533	Sc4wPfr_886	660176	662270			0.918212
10144	-0.0163149	4.32652	g1100	Sc4wPfr_1213	329846	330735	sp|O89110|CASP8_MOUSE	Most upstream protease of the activation cascade of caspases responsible for the TNFRSF6/FAS mediated and TNFRSF1A induced cell death. Binding to the adapter molecule FADD recruits it to either receptor. The resulting aggregate called death-inducing signaling complex (DISC) performs CASP8 proteolytic activation. The active dimeric enzyme is then liberated from the DISC and free to activate downst…	0.965734
101442	-0.0127575	3.70212	g16418	Sc4wPfr_887.1	21283	21794			0.983615
101446	-0.0333725	3.08285	g14202	Sc4wPfr_887.2	12526	13565			0.96665
101452	0.099624	3.38883	g26747	Sc4wPfr_889	43031	44173			0.840664
101460	0.035608	5.79933	g7438	Sc4wPfr_89	102457	103394	sp|P54802|ANAG_HUMAN	Involved in the degradation of heparan sulfate.	0.873779
101462	0.654916	3.37195	g7438	Sc4wPfr_89	116397	117078	sp|P54802|ANAG_HUMAN	Involved in the degradation of heparan sulfate.	8.60239e-05
101463	-0.191868	3.35815	g7438	Sc4wPfr_89	118965	120014	sp|P54802|ANAG_HUMAN	Involved in the degradation of heparan sulfate.	0.593655
101465	-0.064007	4.89724	g7439	Sc4wPfr_89	133505	134166	sp|Q6PC91|BT3L4_DANRE		0.837613
101466	-0.125823	3.79305	g7439	Sc4wPfr_89	136972	137670	sp|Q6PC91|BT3L4_DANRE		0.627577
101468	0.0306529	7.47759	g7440	Sc4wPfr_89	143964	144661	sp|Q13233|M3K1_HUMAN	Component of a protein kinase signal transduction cascade (PubMed:9808624). Activates the ERK and JNK kinase pathways by phosphorylation of MAP2K1 and MAP2K4 (PubMed:9808624). May phosphorylate the MAPK8/JNK1 kinase (PubMed:17761173). Activates CHUK and IKBKB, the central protein kinases of the NF-kappa-B pathway (PubMed:9808624).	0.909031
101472	-0.135302	3.97707	g7440	Sc4wPfr_89	180361	182445	sp|Q13233|M3K1_HUMAN	Component of a protein kinase signal transduction cascade (PubMed:9808624). Activates the ERK and JNK kinase pathways by phosphorylation of MAP2K1 and MAP2K4 (PubMed:9808624). May phosphorylate the MAPK8/JNK1 kinase (PubMed:17761173). Activates CHUK and IKBKB, the central protein kinases of the NF-kappa-B pathway (PubMed:9808624).	0.665692
101479	0.0203586	3.85443	g7441	Sc4wPfr_89	206216	207467			0.962974
10148	-0.0774744	5.46844	g1102	Sc4wPfr_1213	380998	382674			0.726765
101483	0.0346105	4.42333	g7442	Sc4wPfr_89	221689	223804			0.918616
101484	-0.118787	3.64371	g7443	Sc4wPfr_89	224309	225400			0.74695
101485	0.0469047	4.47268	g7443	Sc4wPfr_89	231094	231622			0.88313
101487	0.144116	3.74034	g7443	Sc4wPfr_89	246211	247803			0.681695
10149	-0.0113614	5.04206	g1102	Sc4wPfr_1213	388875	389615			0.973995
101497	0.149526	4.67424		Sc4wPfr_891	15956	17379			0.394706
101498	1.07482	5.73267	g33690	Sc4wPfr_892	874	2757	sp|P21328|RTJK_DROME		3.43517e-08
101499	0.71126	3.75364	g33690	Sc4wPfr_892	2975	4249	sp|P21328|RTJK_DROME		0.000277048
101500	0.322897	5.98676	g33691	Sc4wPfr_892	13033	14315			0.00430892
101503	-0.0142839	6.13346	g21432	Sc4wPfr_892.1	11315	12840	sp|O42387|RS24_TAKRU		0.970993
101504	-0.0906779	4.11265	g21432	Sc4wPfr_892.1	17033	17670	sp|O42387|RS24_TAKRU		0.765774
101506	0.0661827	3.31031	g21433	Sc4wPfr_892.1	29960	30854			0.904548
101507	0.0154062	4.14082	g21433	Sc4wPfr_892.1	31048	32365			0.969603
101509	-0.237427	3.72306	g21434	Sc4wPfr_892.1	45685	47081	sp|Q08509|EPS8_MOUSE	Signaling adapter that controls various cellular protrusions by regulating actin cytoskeleton dynamics and architecture. Depending on its association with other signal transducers, can regulate different processes. Together with SOS1 and ABI1, forms a trimeric complex that participates in transduction of signals from Ras to Rac by activating the Rac-specific guanine nucleotide exchange factor (GE…	0.364239
10151	0.0484575	5.19696	g1102	Sc4wPfr_1213	407499	409171			0.88603
101510	0.197351	3.68677	g21434	Sc4wPfr_892.1	47246	47514	sp|Q08509|EPS8_MOUSE	Signaling adapter that controls various cellular protrusions by regulating actin cytoskeleton dynamics and architecture. Depending on its association with other signal transducers, can regulate different processes. Together with SOS1 and ABI1, forms a trimeric complex that participates in transduction of signals from Ras to Rac by activating the Rac-specific guanine nucleotide exchange factor (GE…	0.399949
101515	0.242918	5.23095	g21434	Sc4wPfr_892.1	100024	101233	sp|Q08509|EPS8_MOUSE	Signaling adapter that controls various cellular protrusions by regulating actin cytoskeleton dynamics and architecture. Depending on its association with other signal transducers, can regulate different processes. Together with SOS1 and ABI1, forms a trimeric complex that participates in transduction of signals from Ras to Rac by activating the Rac-specific guanine nucleotide exchange factor (GE…	0.108229
101516	0.0951175	4.88463	g21435	Sc4wPfr_892.1	105026	106262			0.730507
101520	-0.0427967	5.29659	g21435	Sc4wPfr_892.1	118777	120009			0.902845
101521	0.0251174	4.68152	g21435	Sc4wPfr_892.1	120274	120785			0.965734
101522	-0.030683	5.81992	g21436	Sc4wPfr_892.1	137553	139261			0.900757
101527	-0.133893	5.52369	g10198	Sc4wPfr_894	26488	27168			0.525604
101528	-0.160625	4.84572	g10198	Sc4wPfr_894	54468	55160			0.500877
101530	-0.278268	4.34261	g10198	Sc4wPfr_894	72465	73792			0.363471
101532	0.0557432	3.55157	g10199	Sc4wPfr_894	79714	81161			0.908326
101533	0.0305887	4.65596	g10201	Sc4wPfr_894	139770	142211			0.965986
101554	-0.00971861	5.76252	g13555	Sc4wPfr_895	68817	70819			0.981767
101562	0.0588007	3.48971	g13009	Sc4wPfr_896	29990	30468	sp|O43422|P52K_HUMAN	Upstream regulator of interferon-induced serine/threonine protein kinase R (PKR). May block the PKR-inhibitory function of DNAJC3, resulting in restoration of kinase activity and suppression of cell growth.	0.886658
101564	-0.196502	4.43136	g13009	Sc4wPfr_896	52035	53128	sp|O43422|P52K_HUMAN	Upstream regulator of interferon-induced serine/threonine protein kinase R (PKR). May block the PKR-inhibitory function of DNAJC3, resulting in restoration of kinase activity and suppression of cell growth.	0.205496
101573	0.15235	4.2267	g13010	Sc4wPfr_896	91663	93224			0.622999
101575	-0.476648	4.04331	g13010	Sc4wPfr_896	103353	104406			0.00739731
101576	0.145576	3.96534	g13011	Sc4wPfr_896	110053	110850			0.577378
101577	-0.0387635	5.7032	g13013	Sc4wPfr_896	154341	155116	sp|P0CR40|SEC24_CRYNJ	Component of the coat protein complex II (COPII) which promotes the formation of transport vesicles from the endoplasmic reticulum (ER). The coat has two main functions, the physical deformation of the endoplasmic reticulum membrane into vesicles and the selection of cargo molecules (By similarity).	0.871047
101578	0.0767813	4.94904	g13015	Sc4wPfr_896	212809	214624			0.779431
101579	0.0150699	3.16546	g13016	Sc4wPfr_896	218209	219046	sp|Q5ZKD9|KLH20_CHICK	Substrate-specific adapter of a BCR (BTB-CUL3-RBX1) E3 ubiquitin-protein ligase complex involved in interferon response and anterograde Golgi to endosome transport. The BCR(KLHL20) E3 ubiquitin ligase complex mediates the ubiquitination of target proteins, leading to their degradation by the proteasome. It also specifically mediates 'Lys-33'-linked ubiquitination (By similarity).	0.979654
101580	0.25291	4.02974	g13016	Sc4wPfr_896	221064	222060	sp|Q5ZKD9|KLH20_CHICK	Substrate-specific adapter of a BCR (BTB-CUL3-RBX1) E3 ubiquitin-protein ligase complex involved in interferon response and anterograde Golgi to endosome transport. The BCR(KLHL20) E3 ubiquitin ligase complex mediates the ubiquitination of target proteins, leading to their degradation by the proteasome. It also specifically mediates 'Lys-33'-linked ubiquitination (By similarity).	0.144541
101581	0.0205234	6.20343	g13016	Sc4wPfr_896	226082	228095	sp|Q5ZKD9|KLH20_CHICK	Substrate-specific adapter of a BCR (BTB-CUL3-RBX1) E3 ubiquitin-protein ligase complex involved in interferon response and anterograde Golgi to endosome transport. The BCR(KLHL20) E3 ubiquitin ligase complex mediates the ubiquitination of target proteins, leading to their degradation by the proteasome. It also specifically mediates 'Lys-33'-linked ubiquitination (By similarity).	0.95415
101583	-0.0613281	4.20701	g13017	Sc4wPfr_896	234954	237693	sp|Q13591|SEM5A_HUMAN	Bifunctional axonal guidance cue regulated by sulfated proteoglycans; attractive effects result from interactions with heparan sulfate proteoglycans (HSPGs), while the inhibitory effects depend on interactions with chondroitin sulfate proteoglycans (CSPGs) (By similarity). Ligand for receptor PLXNB3. In glioma cells, SEMA5A stimulation of PLXNB3 results in the disassembly of F-actin stress fibers…	0.871047
101584	-0.199896	3.20848	g13017	Sc4wPfr_896	242170	243642	sp|Q13591|SEM5A_HUMAN	Bifunctional axonal guidance cue regulated by sulfated proteoglycans; attractive effects result from interactions with heparan sulfate proteoglycans (HSPGs), while the inhibitory effects depend on interactions with chondroitin sulfate proteoglycans (CSPGs) (By similarity). Ligand for receptor PLXNB3. In glioma cells, SEMA5A stimulation of PLXNB3 results in the disassembly of F-actin stress fibers…	0.614355
101589	-0.0954499	3.88209	g13018	Sc4wPfr_896	313245	314996	sp|D3YXG0|HMCN1_MOUSE	Promotes cleavage furrow maturation during cytokinesis in preimplantation embryos (PubMed:21215633). May play a role in the architecture of adhesive and flexible epithelial cell junctions (PubMed:17015624). May play a role during myocardial remodeling by imparting an effect on cardiac fibroblast migration (PubMed:24951538).	0.78943
101591	-0.0393741	3.17689	g13017	Sc4wPfr_896	325912	326457	sp|Q13591|SEM5A_HUMAN	Bifunctional axonal guidance cue regulated by sulfated proteoglycans; attractive effects result from interactions with heparan sulfate proteoglycans (HSPGs), while the inhibitory effects depend on interactions with chondroitin sulfate proteoglycans (CSPGs) (By similarity). Ligand for receptor PLXNB3. In glioma cells, SEMA5A stimulation of PLXNB3 results in the disassembly of F-actin stress fibers…	0.951671
101596	-0.434725	3.40257	g13017	Sc4wPfr_896	377307	377851	sp|Q13591|SEM5A_HUMAN	Bifunctional axonal guidance cue regulated by sulfated proteoglycans; attractive effects result from interactions with heparan sulfate proteoglycans (HSPGs), while the inhibitory effects depend on interactions with chondroitin sulfate proteoglycans (CSPGs) (By similarity). Ligand for receptor PLXNB3. In glioma cells, SEMA5A stimulation of PLXNB3 results in the disassembly of F-actin stress fibers…	0.0458948
101597	0.184728	4.24882	g13017	Sc4wPfr_896	378321	379449	sp|Q13591|SEM5A_HUMAN	Bifunctional axonal guidance cue regulated by sulfated proteoglycans; attractive effects result from interactions with heparan sulfate proteoglycans (HSPGs), while the inhibitory effects depend on interactions with chondroitin sulfate proteoglycans (CSPGs) (By similarity). Ligand for receptor PLXNB3. In glioma cells, SEMA5A stimulation of PLXNB3 results in the disassembly of F-actin stress fibers…	0.375289
101598	-0.116359	3.44016	g13017	Sc4wPfr_896	382417	383071	sp|Q13591|SEM5A_HUMAN	Bifunctional axonal guidance cue regulated by sulfated proteoglycans; attractive effects result from interactions with heparan sulfate proteoglycans (HSPGs), while the inhibitory effects depend on interactions with chondroitin sulfate proteoglycans (CSPGs) (By similarity). Ligand for receptor PLXNB3. In glioma cells, SEMA5A stimulation of PLXNB3 results in the disassembly of F-actin stress fibers…	0.76239
101601	0.165369	3.61342	g13019	Sc4wPfr_896	394811	395870	sp|P16273|PRPX_HORVU		0.590416
101602	0.26941	3.65032	g13019	Sc4wPfr_896	396187	397396	sp|P16273|PRPX_HORVU		0.141077
101605	0.205999	4.07279	g13020	Sc4wPfr_896	414535	415222	sp|P16273|PRPX_HORVU		0.59727
101606	-0.0564335	4.65956	g13020	Sc4wPfr_896	416772	417231	sp|P16273|PRPX_HORVU		0.893701
101608	-0.0918739	5.29763	g13020	Sc4wPfr_896	421440	423009	sp|P16273|PRPX_HORVU		0.815446
101611	-0.0972931	5.41075	g13022	Sc4wPfr_896	463945	464452	sp|Q53H47|SETMR_HUMAN	Protein derived from the fusion of a methylase with the transposase of an Hsmar1 transposon that plays a role in DNA double-strand break repair, stalled replication fork restart and DNA integration. DNA-binding protein, it is indirectly recruited to sites of DNA damage through protein-protein interactions. Has also kept a sequence-specific DNA-binding activity recognizing the 19-mer core of the 5…	0.628886
101612	-0.242	5.02983	g13021	Sc4wPfr_896	476496	477226			0.166876
101615	-0.189528	3.46843	g13026	Sc4wPfr_896	498685	501032			0.680949
101625	0.129722	3.01951	g13029	Sc4wPfr_896	558588	559241			0.790994
101632	-0.0462913	5.39693	g14204	Sc4wPfr_897	39691	41023			0.87475
101638	-0.246617	2.69312	g9116	Sc4wPfr_898	39208	39911			0.739641
101639	-0.0351601	5.6044	g9117	Sc4wPfr_898	42304	43681			0.929589
101640	-0.0571445	3.41687	g9118	Sc4wPfr_898	53647	54160			0.919941
101641	-0.0457189	6.47511	g9118	Sc4wPfr_898	57063	58865			0.898236
101643	-0.201565	2.92901	g9118	Sc4wPfr_898	63909	65371			0.638228
101648	0.0581639	5.63608	g9119	Sc4wPfr_898	131192	131767			0.813887
101651	-0.142264	4.09733	g9119	Sc4wPfr_898	145039	147969			0.670784
101676	-0.00718764	5.74508	g9124	Sc4wPfr_898	346739	348166			0.982992
101686	0.0371971	4.80104	g22593	Sc4wPfr_899	55054	56097	sp|B2RW38|CFA58_MOUSE		0.90886
101687	-0.0149009	6.26931	g22593	Sc4wPfr_899	56267	57756	sp|B2RW38|CFA58_MOUSE		0.958931
101692	-0.00343642	3.69258	g22595	Sc4wPfr_899	123859	124377	sp|P21328|RTJK_DROME		0.994783
101695	-0.00593929	4.60362	g22596	Sc4wPfr_899	136514	137340	sp|Q52KD8|EAF6_XENLA	Component of the NuA4 histone acetyltransferase complex which is involved in transcriptional activation of select genes principally by acetylation of nucleosomal histone H4 and H2A. This modification may both alter nucleosome - DNA interactions and promote interaction of the modified histones with other proteins which positively regulate transcription. Component of the HBO1 complex which has a hi…	0.988934
101703	-0.105338	3.87565	g22597	Sc4wPfr_899	192168	194478	sp|P61759|PFD3_MOUSE	Binds specifically to cytosolic chaperonin (c-CPN) and transfers target proteins to it. Binds to nascent polypeptide chain and promotes folding in an environment in which there are many competing pathways for nonnative proteins (By similarity).	0.781467
101704	0.144345	4.08967	g22598	Sc4wPfr_899	198097	198858			0.711874
101708	0.0377587	4.08467	g22601	Sc4wPfr_899	236955	237482	sp|O93309|SMC3_XENLA	Central component of cohesin, a complex required for chromosome cohesion during the cell cycle. The cohesin complex may form a large proteinaceous ring within which sister chromatids can be trapped. At anaphase, the complex is cleaved and dissociates from chromatin, allowing sister chromatids to segregate. Cohesion is coupled to DNA replication and is involved in DNA repair. The cohesin complex p…	0.93253
101714	-0.167334	3.84786	g22607	Sc4wPfr_899	328136	331692	sp|Q03410|SYCP1_RAT	Major component of the transverse filaments of synaptonemal complexes, formed between homologous chromosomes during meiotic prophase (PubMed:1464329). Required for normal assembly of the central element of the synaptonemal complexes. Required for normal centromere pairing during meiosis. Required for normal meiotic chromosome synapsis during oocyte and spermatocyte development and for normal male…	0.653101
101718	0.0240549	5.72586	g22608	Sc4wPfr_899	376060	376816	sp|O15442|MPPD1_HUMAN	May have metallophosphoesterase activity (in vitro).	0.936254
101719	0.0122075	5.9846	g22609	Sc4wPfr_899	383559	384353	sp|Q9NZJ5|E2AK3_HUMAN	Metabolic-stress sensing protein kinase that phosphorylates the alpha subunit of eukaryotic translation initiation factor 2 (eIF-2-alpha/EIF2S1) on 'Ser-52' during the unfolded protein response (UPR) and in response to low amino acid availability. Converts phosphorylated eIF-2-alpha/EIF2S1 either in a global protein synthesis inhibitor, leading to a reduced overall utilization of amino acids, or …	0.96641
101728	0.419875	3.59959	g22611	Sc4wPfr_899	479621	480386			0.0655508
101734	-0.0762118	4.66554	g22612	Sc4wPfr_899	498730	499527	sp|Q91827|AR1_XENLA	Could be the homolog of mammalian Bcl-W.	0.815495
101735	0.428782	4.2531	g22612	Sc4wPfr_899	499908	500700	sp|Q91827|AR1_XENLA	Could be the homolog of mammalian Bcl-W.	0.00550535
101736	0.20217	4.19659	g22612	Sc4wPfr_899	501880	502511	sp|Q91827|AR1_XENLA	Could be the homolog of mammalian Bcl-W.	0.300893
101738	0.0486042	5.55662	g22612	Sc4wPfr_899	516329	517538	sp|Q91827|AR1_XENLA	Could be the homolog of mammalian Bcl-W.	0.900553
101739	-0.0345864	6.68084	g22612	Sc4wPfr_899	518265	519153	sp|Q91827|AR1_XENLA	Could be the homolog of mammalian Bcl-W.	0.922396
10174	-0.0367712	5.44557	g29709	Sc4wPfr_1214	2001	3381	sp|Q9HB97|PARVA_RAT	Plays a role in sarcomere organization and in smooth muscle cell contraction. Required for normal development of the embryonic cardiovascular system, and for normal septation of the heart outflow tract. Plays a role in sprouting angiogenesis and is required for normal adhesion of vascular smooth muscle cells to endothelial cells during blood vessel development (By similarity). Plays a role in the…	0.887648
101740	0.0416616	4.12943	g22612	Sc4wPfr_899	523915	525346	sp|Q91827|AR1_XENLA	Could be the homolog of mammalian Bcl-W.	0.930911
101741	-0.44308	3.71909	g22613	Sc4wPfr_899	528691	528999	sp|Q0VD42|TM136_BOVIN		0.0962574
101742	-0.0363163	4.07295	g22613	Sc4wPfr_899	534937	536722	sp|Q0VD42|TM136_BOVIN		0.93834
101743	0.112598	3.63933	g22613	Sc4wPfr_899	536972	537888	sp|Q0VD42|TM136_BOVIN		0.687766
101747	-0.0803915	5.83698	g22614	Sc4wPfr_899	545994	547670	sp|Q5DQR4|STB5L_MOUSE	Plays a role in vesicle trafficking and exocytosis inhibition (PubMed:25002582). In pancreatic beta-cells, inhibits insulin secretion probably by interacting with and regulating STX1A and STX4, key t-SNARE proteins involved in the fusion of insulin granules to the plasma membrane (PubMed:21998599). Plays also a role in neurotransmitter release by inhibiting basal acetylcholine release from axon t…	0.616068
101751	-0.0390215	3.47211	g22615	Sc4wPfr_899	570137	570523	sp|Q8HYJ7|FUT5_GORGO	May catalyze alpha-1,3 glycosidic linkages involved in the expression of VIM-2, Lewis X/SSEA-1 and sialyl Lewis X antigens.	0.958931
101753	0.225769	5.63786	g22615	Sc4wPfr_899	573069	574434	sp|Q8HYJ7|FUT5_GORGO	May catalyze alpha-1,3 glycosidic linkages involved in the expression of VIM-2, Lewis X/SSEA-1 and sialyl Lewis X antigens.	0.502467
101754	0.0917528	4.5566	g22615	Sc4wPfr_899	575876	576505	sp|Q8HYJ7|FUT5_GORGO	May catalyze alpha-1,3 glycosidic linkages involved in the expression of VIM-2, Lewis X/SSEA-1 and sialyl Lewis X antigens.	0.881037
101755	-0.0896279	3.80143	g22615	Sc4wPfr_899	576779	577101	sp|Q8HYJ7|FUT5_GORGO	May catalyze alpha-1,3 glycosidic linkages involved in the expression of VIM-2, Lewis X/SSEA-1 and sialyl Lewis X antigens.	0.886274
101756	-0.0412363	4.80214	g22615	Sc4wPfr_899	578968	580593	sp|Q8HYJ7|FUT5_GORGO	May catalyze alpha-1,3 glycosidic linkages involved in the expression of VIM-2, Lewis X/SSEA-1 and sialyl Lewis X antigens.	0.934498
101757	-0.131307	3.73783	g22615	Sc4wPfr_899	582808	583453	sp|Q8HYJ7|FUT5_GORGO	May catalyze alpha-1,3 glycosidic linkages involved in the expression of VIM-2, Lewis X/SSEA-1 and sialyl Lewis X antigens.	0.666056
101760	-0.171579	6.08162	g22616	Sc4wPfr_899	593184	594246	sp|Q5DQR4|STB5L_MOUSE	Plays a role in vesicle trafficking and exocytosis inhibition (PubMed:25002582). In pancreatic beta-cells, inhibits insulin secretion probably by interacting with and regulating STX1A and STX4, key t-SNARE proteins involved in the fusion of insulin granules to the plasma membrane (PubMed:21998599). Plays also a role in neurotransmitter release by inhibiting basal acetylcholine release from axon t…	0.270639
101761	0.029087	7.35646	g22616	Sc4wPfr_899	597642	599157	sp|Q5DQR4|STB5L_MOUSE	Plays a role in vesicle trafficking and exocytosis inhibition (PubMed:25002582). In pancreatic beta-cells, inhibits insulin secretion probably by interacting with and regulating STX1A and STX4, key t-SNARE proteins involved in the fusion of insulin granules to the plasma membrane (PubMed:21998599). Plays also a role in neurotransmitter release by inhibiting basal acetylcholine release from axon t…	0.920869
101762	0.00961975	4.78434	g22616	Sc4wPfr_899	599621	600306	sp|Q5DQR4|STB5L_MOUSE	Plays a role in vesicle trafficking and exocytosis inhibition (PubMed:25002582). In pancreatic beta-cells, inhibits insulin secretion probably by interacting with and regulating STX1A and STX4, key t-SNARE proteins involved in the fusion of insulin granules to the plasma membrane (PubMed:21998599). Plays also a role in neurotransmitter release by inhibiting basal acetylcholine release from axon t…	0.980538
101763	0.00193535	4.5811	g22616	Sc4wPfr_899	672240	673265	sp|Q5DQR4|STB5L_MOUSE	Plays a role in vesicle trafficking and exocytosis inhibition (PubMed:25002582). In pancreatic beta-cells, inhibits insulin secretion probably by interacting with and regulating STX1A and STX4, key t-SNARE proteins involved in the fusion of insulin granules to the plasma membrane (PubMed:21998599). Plays also a role in neurotransmitter release by inhibiting basal acetylcholine release from axon t…	0.996156
101764	-0.0887652	5.47827	g22616	Sc4wPfr_899	727710	728693	sp|Q5DQR4|STB5L_MOUSE	Plays a role in vesicle trafficking and exocytosis inhibition (PubMed:25002582). In pancreatic beta-cells, inhibits insulin secretion probably by interacting with and regulating STX1A and STX4, key t-SNARE proteins involved in the fusion of insulin granules to the plasma membrane (PubMed:21998599). Plays also a role in neurotransmitter release by inhibiting basal acetylcholine release from axon t…	0.678044
101765	-0.0164642	3.51148	g22616	Sc4wPfr_899	734374	734914	sp|Q5DQR4|STB5L_MOUSE	Plays a role in vesicle trafficking and exocytosis inhibition (PubMed:25002582). In pancreatic beta-cells, inhibits insulin secretion probably by interacting with and regulating STX1A and STX4, key t-SNARE proteins involved in the fusion of insulin granules to the plasma membrane (PubMed:21998599). Plays also a role in neurotransmitter release by inhibiting basal acetylcholine release from axon t…	0.979134
101775	0.0693304	5.59516	g22618	Sc4wPfr_899	844883	845895	sp|Q9WVE9|ITSN1_RAT	Adapter protein that provides a link between the endocytic membrane traffic and the actin assembly machinery. Acts as guanine nucleotide exchange factor (GEF) for CDC42, and thereby stimulates actin nucleation mediated by WASL and the ARP2/3 complex (By similarity). Plays a role in the assembly and maturation of clathrin-coated vesicles (PubMed:20448150). Recruits FCHSD2 to clathrin-coated pits (…	0.700129
101778	-0.00614518	4.13183	g22619	Sc4wPfr_899	871651	872369			0.991993
101779	0.133802	3.49138	g22619	Sc4wPfr_899	880797	881266			0.717169
101780	-0.0429118	4.79834	g22620	Sc4wPfr_899	884576	885587			0.900804
101781	-0.688495	3.83194	g22620	Sc4wPfr_899	885837	886582			0.000125321
101786	-0.0936552	3.67945	g22620	Sc4wPfr_899	902615	903767			0.849308
101787	-0.0176391	4.40021	g22621	Sc4wPfr_899	936373	936738			0.966714
101788	-0.0697077	5.50514	g22621	Sc4wPfr_899	937036	937899			0.728324
101803	-0.0987718	4.0159	g22624	Sc4wPfr_899	993937	994301	sp|Q7Z494|NPHP3_HUMAN	Required for normal ciliary development and function. Inhibits disheveled-1-induced canonical Wnt-signaling activity and may also play a role in the control of non-canonical Wnt signaling which regulates planar cell polarity. Probably acts as a molecular switch between different Wnt signaling pathways. Required for proper convergent extension cell movements.	0.698572
101808	0.0342744	3.91684	g31753	Sc4wPfr_9	22838	24175			0.941169
101809	-0.0574845	6.11992	g31753	Sc4wPfr_9	28602	29362			0.814788
10181	0.0470876	5.41195	g29709	Sc4wPfr_1214	43934	45402	sp|Q9HB97|PARVA_RAT	Plays a role in sarcomere organization and in smooth muscle cell contraction. Required for normal development of the embryonic cardiovascular system, and for normal septation of the heart outflow tract. Plays a role in sprouting angiogenesis and is required for normal adhesion of vascular smooth muscle cells to endothelial cells during blood vessel development (By similarity). Plays a role in the…	0.836514
101811	-0.185499	3.43137	g31753	Sc4wPfr_9	70382	72678			0.527404
101814	-0.00934037	5.08778	g31754	Sc4wPfr_9	97657	98810	sp|Q9CZV5|ST65G_MOUSE		0.975193
101818	0.765203	3.16083	g31756	Sc4wPfr_9	122119	122802			0.028329
10182	-0.0333723	3.49305	g29709	Sc4wPfr_1214	47646	48689	sp|Q9HB97|PARVA_RAT	Plays a role in sarcomere organization and in smooth muscle cell contraction. Required for normal development of the embryonic cardiovascular system, and for normal septation of the heart outflow tract. Plays a role in sprouting angiogenesis and is required for normal adhesion of vascular smooth muscle cells to endothelial cells during blood vessel development (By similarity). Plays a role in the…	0.951671
101820	-0.00509345	4.04184	g31758	Sc4wPfr_9	137072	137733			0.992606
101823	-0.0213187	5.1336	g31762	Sc4wPfr_9	232832	233666	sp|Q61493|REV3L_MOUSE	Catalytic subunit of the DNA polymerase zeta complex, an error-prone polymerase specialized in translesion DNA synthesis (TLS). Lacks an intrinsic 3'-5' exonuclease activity and thus has no proofreading function.	0.940737
101829	-0.114552	3.41783	g31766	Sc4wPfr_9	301020	302112			0.773335
101831	-0.0186834	5.22581	g31773	Sc4wPfr_9	362184	362740			0.943812
101832	-0.0189642	5.5435	g31774	Sc4wPfr_9	366650	367700	sp|Q9CPT5|NOP16_MOUSE		0.951053
101835	0.00809908	4.69125	g31777	Sc4wPfr_9	394320	395435	sp|P42731|PABP2_ARATH	Binds the poly(A) tail of mRNA. Appears to be an important mediator of the multiple roles of the poly(A) tail in mRNA biogenesis, stability and translation. In the cytoplasm, affects both translation and mRNA decay. Stimulates translation by interaction with translation initiation factor eIF4G, a subunit of the cap-binding complex eIF4F, bringing the 5'- and 3'-ends of the mRNA in proximity. The …	0.984095
101841	-0.0520006	5.81316	g31781	Sc4wPfr_9	479848	480563	sp|Q09081|KCNA2_RABIT	Voltage-gated potassium channel that mediates transmembrane potassium transport in excitable membranes, primarily in the brain and the central nervous system, but also in the cardiovascular system. Prevents aberrant action potential firing and regulates neuronal output. Forms tetrameric potassium-selective channels through which potassium ions pass in accordance with their electrochemical gradien…	0.808987
101842	-0.0626189	4.83875	g31782	Sc4wPfr_9	498518	499452	sp|Q6ZUT1|CK057_HUMAN		0.832441
101847	-0.0832472	3.65066	g31785	Sc4wPfr_9	523237	524132	sp|Q9BUZ4|TRAF4_HUMAN	Adapter protein and signal transducer that links members of the tumor necrosis factor receptor (TNFR) family to different signaling pathways. Plays a role in the activation of NF-kappa-B and JNK, and in the regulation of cell survival and apoptosis. Regulates activation of NF-kappa-B in response to signaling through Toll-like receptors. Required for normal skeleton development, and for normal dev…	0.830486
101851	-0.057315	3.99336	g31791	Sc4wPfr_9	571362	572428	sp|O73606|KCNG2_CHICK	Potassium channel subunit. Modulates channel activity (By similarity).	0.879666
101853	0.0724717	4.19001	g31792	Sc4wPfr_9	582501	584053	sp|Q5E9R2|PLCD_BOVIN	Converts 1-acyl-sn-glycerol-3-phosphate (lysophosphatidic acid or LPA) into 1,2-diacyl-sn-glycerol-3-phosphate (phosphatidic acid or PA) by incorporating an acyl moiety at the sn-2 position of the glycerol backbone (By similarity). Exhibits high acyl-CoA specificity for polyunsaturated fatty acyl-CoA, especially docosahexaenoyl-CoA (22:6-CoA, DHA-CoA) (By similarity).	0.829357
101855	-0.0519622	5.54087	g31793	Sc4wPfr_9	622374	623272	sp|Q9EPS3|GLCE_MOUSE	Converts D-glucuronic acid residues adjacent to N-sulfate sugar residues to L-iduronic acid residues, both in maturing heparan sulfate (HS) and heparin chains. This is important for further modifications that determine the specificity of interactions between these glycosaminoglycans and proteins.	0.80172
101856	-0.00550931	4.85224	g31794	Sc4wPfr_9	634561	635835	sp|Q5R757|PLCD_PONAB	Converts 1-acyl-sn-glycerol-3-phosphate (lysophosphatidic acid or LPA) into 1,2-diacyl-sn-glycerol-3-phosphate (phosphatidic acid or PA) by incorporating an acyl moiety at the sn-2 position of the glycerol backbone (By similarity). Exhibits high acyl-CoA specificity for polyunsaturated fatty acyl-CoA, especially docosahexaenoyl-CoA (22:6-CoA, DHA-CoA) (By similarity).	0.988934
101857	-0.136911	4.43649	g31794	Sc4wPfr_9	636627	637687	sp|Q5R757|PLCD_PONAB	Converts 1-acyl-sn-glycerol-3-phosphate (lysophosphatidic acid or LPA) into 1,2-diacyl-sn-glycerol-3-phosphate (phosphatidic acid or PA) by incorporating an acyl moiety at the sn-2 position of the glycerol backbone (By similarity). Exhibits high acyl-CoA specificity for polyunsaturated fatty acyl-CoA, especially docosahexaenoyl-CoA (22:6-CoA, DHA-CoA) (By similarity).	0.529444
101866	-0.0486934	4.96644	g31795	Sc4wPfr_9	690118	691612	sp|Q8ETH0|HMP_OCEIH	Is involved in NO detoxification in an aerobic process, termed nitric oxide dioxygenase (NOD) reaction that utilizes O(2) and NAD(P)H to convert NO to nitrate, which protects the bacterium from various noxious nitrogen compounds. Therefore, plays a central role in the inducible response to nitrosative stress.	0.87466
101868	0.793971	2.91719	g31795	Sc4wPfr_9	699430	699908	sp|Q8ETH0|HMP_OCEIH	Is involved in NO detoxification in an aerobic process, termed nitric oxide dioxygenase (NOD) reaction that utilizes O(2) and NAD(P)H to convert NO to nitrate, which protects the bacterium from various noxious nitrogen compounds. Therefore, plays a central role in the inducible response to nitrosative stress.	0.00139977
101869	0.109049	5.14377	g31795	Sc4wPfr_9	702035	702863	sp|Q8ETH0|HMP_OCEIH	Is involved in NO detoxification in an aerobic process, termed nitric oxide dioxygenase (NOD) reaction that utilizes O(2) and NAD(P)H to convert NO to nitrate, which protects the bacterium from various noxious nitrogen compounds. Therefore, plays a central role in the inducible response to nitrosative stress.	0.572683
10187	-0.00922477	5.37072	g29710	Sc4wPfr_1214	77693	79130			0.973995
101870	-0.12065	3.92118	g31795	Sc4wPfr_9	703546	704446	sp|Q8ETH0|HMP_OCEIH	Is involved in NO detoxification in an aerobic process, termed nitric oxide dioxygenase (NOD) reaction that utilizes O(2) and NAD(P)H to convert NO to nitrate, which protects the bacterium from various noxious nitrogen compounds. Therefore, plays a central role in the inducible response to nitrosative stress.	0.62498
101872	-0.401717	3.06177	g31795	Sc4wPfr_9	706323	706706	sp|Q8ETH0|HMP_OCEIH	Is involved in NO detoxification in an aerobic process, termed nitric oxide dioxygenase (NOD) reaction that utilizes O(2) and NAD(P)H to convert NO to nitrate, which protects the bacterium from various noxious nitrogen compounds. Therefore, plays a central role in the inducible response to nitrosative stress.	0.298457
101874	-0.170571	4.7944	g31795	Sc4wPfr_9	713587	713910	sp|Q8ETH0|HMP_OCEIH	Is involved in NO detoxification in an aerobic process, termed nitric oxide dioxygenase (NOD) reaction that utilizes O(2) and NAD(P)H to convert NO to nitrate, which protects the bacterium from various noxious nitrogen compounds. Therefore, plays a central role in the inducible response to nitrosative stress.	0.324848
101875	-0.0252873	6.08455	g31795	Sc4wPfr_9	714768	716058	sp|Q8ETH0|HMP_OCEIH	Is involved in NO detoxification in an aerobic process, termed nitric oxide dioxygenase (NOD) reaction that utilizes O(2) and NAD(P)H to convert NO to nitrate, which protects the bacterium from various noxious nitrogen compounds. Therefore, plays a central role in the inducible response to nitrosative stress.	0.940138
101876	0.0556331	3.18106	g31795	Sc4wPfr_9	719965	720588	sp|Q8ETH0|HMP_OCEIH	Is involved in NO detoxification in an aerobic process, termed nitric oxide dioxygenase (NOD) reaction that utilizes O(2) and NAD(P)H to convert NO to nitrate, which protects the bacterium from various noxious nitrogen compounds. Therefore, plays a central role in the inducible response to nitrosative stress.	0.916564
101879	-0.0315616	4.21455	g31796	Sc4wPfr_9	739967	740789	sp|Q6P816|YKT6_XENTR	Vesicular soluble NSF attachment protein receptor (v-SNARE) mediating vesicle docking and fusion to a specific acceptor cellular compartment. Functions in endoplasmic reticulum to Golgi transport; as part of a SNARE complex composed of GOSR1, GOSR2 and STX5. Functions in early/recycling endosome to TGN transport; as part of a SNARE complex composed of BET1L, GOSR1 and STX5. Has a S-palmitoyl tran…	0.943178
10188	-0.0591203	4.88655	g29711	Sc4wPfr_1214	91348	92631	sp|Q9BTV6|DPH7_HUMAN	Catalyzes the demethylation of diphthine methyl ester to form diphthine, an intermediate diphthamide biosynthesis, a post-translational modification of histidine which occurs in translation elongation factor 2 (EEF2) which can be ADP-ribosylated by diphtheria toxin and by Pseudomonas exotoxin A (Eta).	0.876555
101884	0.0180244	3.41723	g31797	Sc4wPfr_9	784422	785660			0.970972
101885	-0.0637757	4.83967	g31798	Sc4wPfr_9	790953	792514			0.826261
101886	0.100346	4.32483	g31798	Sc4wPfr_9	797282	798245			0.724402
101887	0.0839826	4.73406	g31799	Sc4wPfr_9	799274	800166			0.781942
10189	0.0194979	3.67271	g29711	Sc4wPfr_1214	92997	94274	sp|Q9BTV6|DPH7_HUMAN	Catalyzes the demethylation of diphthine methyl ester to form diphthine, an intermediate diphthamide biosynthesis, a post-translational modification of histidine which occurs in translation elongation factor 2 (EEF2) which can be ADP-ribosylated by diphtheria toxin and by Pseudomonas exotoxin A (Eta).	0.971624
101893	0.295473	4.22612	g31799	Sc4wPfr_9	828359	829292			0.0685405
101894	-0.0260833	4.88775	g31801	Sc4wPfr_9	833835	834787	sp|Q9I8D1|MYO6_CHICK	Myosins are actin-based motor molecules with ATPase activity (By similarity). Unconventional myosins serve in intracellular movements (By similarity). Myosin 6 is a reverse-direction motor protein that moves towards the minus-end of actin filaments (By similarity). Has slow rate of actin-activated ADP release due to weak ATP binding (By similarity). Functions in a variety of intracellular process…	0.945246
101899	0.0372975	4.96848	g31802	Sc4wPfr_9	896668	898269	sp|Q9I8D1|MYO6_CHICK	Myosins are actin-based motor molecules with ATPase activity (By similarity). Unconventional myosins serve in intracellular movements (By similarity). Myosin 6 is a reverse-direction motor protein that moves towards the minus-end of actin filaments (By similarity). Has slow rate of actin-activated ADP release due to weak ATP binding (By similarity). Functions in a variety of intracellular process…	0.913182
10190	-0.209611	3.24067	g29711	Sc4wPfr_1214	99251	100865	sp|Q9BTV6|DPH7_HUMAN	Catalyzes the demethylation of diphthine methyl ester to form diphthine, an intermediate diphthamide biosynthesis, a post-translational modification of histidine which occurs in translation elongation factor 2 (EEF2) which can be ADP-ribosylated by diphtheria toxin and by Pseudomonas exotoxin A (Eta).	0.619388
101901	0.162459	4.96367	g31803	Sc4wPfr_9	902960	903388			0.497169
101902	0.19489	4.91996	g31804	Sc4wPfr_9	904859	906401			0.110493
101903	0.484349	3.72618	g31804	Sc4wPfr_9	907595	908250			0.00309124
101905	0.216801	5.05868	g31803	Sc4wPfr_9	916320	917046			0.313178
101906	0.069011	6.33513	g31803	Sc4wPfr_9	917330	917990			0.779628
101907	0.203817	4.9439	g31803	Sc4wPfr_9	918284	918835			0.109566
10191	-0.353097	3.89633	g29711	Sc4wPfr_1214	105591	107323	sp|Q9BTV6|DPH7_HUMAN	Catalyzes the demethylation of diphthine methyl ester to form diphthine, an intermediate diphthamide biosynthesis, a post-translational modification of histidine which occurs in translation elongation factor 2 (EEF2) which can be ADP-ribosylated by diphtheria toxin and by Pseudomonas exotoxin A (Eta).	0.410666
101915	-0.0128151	6.15342	g31809	Sc4wPfr_9	961607	962476			0.960011
10192	-0.123766	4.26738	g29711	Sc4wPfr_1214	108353	110650	sp|Q9BTV6|DPH7_HUMAN	Catalyzes the demethylation of diphthine methyl ester to form diphthine, an intermediate diphthamide biosynthesis, a post-translational modification of histidine which occurs in translation elongation factor 2 (EEF2) which can be ADP-ribosylated by diphtheria toxin and by Pseudomonas exotoxin A (Eta).	0.786449
101923	-0.161216	3.33526	g31811	Sc4wPfr_9	1020042	1021195	sp|Q497Q6|F228B_MOUSE		0.638228
101925	-0.381981	4.32778	g31812	Sc4wPfr_9	1025858	1026584			0.00384811
101926	-0.0352032	5.75326	g31813	Sc4wPfr_9	1035175	1035936	sp|Q6PBK1|CCD58_DANRE		0.885254
101927	0.0585417	5.2342	g31813	Sc4wPfr_9	1045809	1046747	sp|Q6PBK1|CCD58_DANRE		0.900553
10193	-0.241305	3.76733	g29711	Sc4wPfr_1214	111483	113045	sp|Q9BTV6|DPH7_HUMAN	Catalyzes the demethylation of diphthine methyl ester to form diphthine, an intermediate diphthamide biosynthesis, a post-translational modification of histidine which occurs in translation elongation factor 2 (EEF2) which can be ADP-ribosylated by diphtheria toxin and by Pseudomonas exotoxin A (Eta).	0.639935
101931	0.0190011	5.06951	g31814	Sc4wPfr_9	1067044	1068532			0.962717
101933	0.0744931	4.39533	g31815	Sc4wPfr_9	1087119	1087937			0.789423
101934	-0.235483	3.98309	g31815	Sc4wPfr_9	1090896	1091585			0.307632
101936	-0.362851	3.85906	g31816	Sc4wPfr_9	1095227	1095777			0.119072
101937	-0.0326463	3.63764	g31816	Sc4wPfr_9	1097036	1098036			0.949618
101938	0.202136	4.22103	g31816	Sc4wPfr_9	1102113	1102617			0.422141
101943	0.0762842	5.50582	g18766	Sc4wPfr_9.1	7588	8748			0.797859
101946	-0.0225357	4.42338	g18768	Sc4wPfr_9.1	45087	46523			0.956389
10195	-0.0208001	4.22401	g29711	Sc4wPfr_1214	118939	120924	sp|Q9BTV6|DPH7_HUMAN	Catalyzes the demethylation of diphthine methyl ester to form diphthine, an intermediate diphthamide biosynthesis, a post-translational modification of histidine which occurs in translation elongation factor 2 (EEF2) which can be ADP-ribosylated by diphtheria toxin and by Pseudomonas exotoxin A (Eta).	0.96316
101951	0.568736	3.1584	g18771	Sc4wPfr_9.1	99266	99771			0.00172043
101953	-0.0826056	4.06214	g18771	Sc4wPfr_9.1	101162	101935			0.860867
101955	0.0480216	4.10803	g18771	Sc4wPfr_9.1	112466	113774			0.913735
101960	-0.212989	4.37085	g18772	Sc4wPfr_9.1	167168	167921	sp|Q626N3|TM151_CAEBR		0.228038
101961	-0.198245	3.57974	g18772	Sc4wPfr_9.1	176547	177711	sp|Q626N3|TM151_CAEBR		0.550624
101969	-0.000873443	5.61666	g1121	Sc4wPfr_90	39955	40885	sp|Q9CYC6|DCP2_MOUSE	Decapping metalloenzyme that catalyzes the cleavage of the cap structure on mRNAs (PubMed:21070968). Removes the 7-methyl guanine cap structure from mRNA molecules, yielding a 5'-phosphorylated mRNA fragment and 7m-GDP (PubMed:21070968). Necessary for the degradation of mRNAs, both in normal mRNA turnover and in nonsense-mediated mRNA decay (By similarity). Plays a role in replication-dependent h…	0.997764
101970	0.103583	4.22393	g1121	Sc4wPfr_90	41252	41684	sp|Q9CYC6|DCP2_MOUSE	Decapping metalloenzyme that catalyzes the cleavage of the cap structure on mRNAs (PubMed:21070968). Removes the 7-methyl guanine cap structure from mRNA molecules, yielding a 5'-phosphorylated mRNA fragment and 7m-GDP (PubMed:21070968). Necessary for the degradation of mRNAs, both in normal mRNA turnover and in nonsense-mediated mRNA decay (By similarity). Plays a role in replication-dependent h…	0.670297
101974	0.0638792	3.73118	g1122	Sc4wPfr_90	52021	53849			0.888744
101976	-0.0360764	6.03225	g1123	Sc4wPfr_90	66767	67444			0.889636
101977	-0.174887	3.62076	g1123	Sc4wPfr_90	67663	67959			0.595264
101980	-0.188668	5.89811	g1125	Sc4wPfr_90	98948	99777	sp|Q00G26|PLIN5_HUMAN	Lipid droplet-associated protein that maintains the balance between lipogenesis and lipolysis and also regulates fatty acid oxidation in oxidative tissues. Recruits mitochondria to the surface of lipid droplets and is involved in lipid droplet homeostasis by regulating both the storage of fatty acids in the form of triglycerides and the release of fatty acids for mitochondrial fatty acid oxidatio…	0.0966438
101981	-0.448417	4.417	g1125	Sc4wPfr_90	100908	102672	sp|Q00G26|PLIN5_HUMAN	Lipid droplet-associated protein that maintains the balance between lipogenesis and lipolysis and also regulates fatty acid oxidation in oxidative tissues. Recruits mitochondria to the surface of lipid droplets and is involved in lipid droplet homeostasis by regulating both the storage of fatty acids in the form of triglycerides and the release of fatty acids for mitochondrial fatty acid oxidatio…	0.261374
101982	-0.452662	4.1009	g1126	Sc4wPfr_90	107492	108733			0.291855
101985	0.0210919	5.33206	g1127	Sc4wPfr_90	119551	120046	sp|Q9NXR5|ANR10_HUMAN		0.96641
101986	0.573035	3.80382	g1127	Sc4wPfr_90	121418	122076	sp|Q9NXR5|ANR10_HUMAN		0.000128658
101987	-0.126998	6.07466	g1127	Sc4wPfr_90	122453	123351	sp|Q9NXR5|ANR10_HUMAN		0.552007
101988	0.0579901	4.36729	g1127	Sc4wPfr_90	132055	133338	sp|Q9NXR5|ANR10_HUMAN		0.85502
10199	-0.14349	4.27379	g29711	Sc4wPfr_1214	130602	130997	sp|Q9BTV6|DPH7_HUMAN	Catalyzes the demethylation of diphthine methyl ester to form diphthine, an intermediate diphthamide biosynthesis, a post-translational modification of histidine which occurs in translation elongation factor 2 (EEF2) which can be ADP-ribosylated by diphtheria toxin and by Pseudomonas exotoxin A (Eta).	0.457613
101990	0.0617674	4.12676	g1127	Sc4wPfr_90	141478	142780	sp|Q9NXR5|ANR10_HUMAN		0.874243
101992	0.0243277	5.18572	g1128	Sc4wPfr_90	158467	160685			0.943812
101994	-0.0532411	4.22308	g1131	Sc4wPfr_90	167641	168451			0.874213
101995	-0.114313	3.41662	g1131	Sc4wPfr_90	168976	169594			0.736172
101996	-0.223289	4.00846	g1132	Sc4wPfr_90	174347	176743			0.470494
101998	-0.262778	5.07216	g1133	Sc4wPfr_90	186591	188146			0.00945538
10200	0.128231	6.19349	g29711	Sc4wPfr_1214	134334	135437	sp|Q9BTV6|DPH7_HUMAN	Catalyzes the demethylation of diphthine methyl ester to form diphthine, an intermediate diphthamide biosynthesis, a post-translational modification of histidine which occurs in translation elongation factor 2 (EEF2) which can be ADP-ribosylated by diphtheria toxin and by Pseudomonas exotoxin A (Eta).	0.443421
102002	-0.0882078	4.91424	g1135	Sc4wPfr_90	214124	215176	sp|Q8TC12|RDH11_HUMAN	Retinol dehydrogenase with a clear preference for NADP. Displays high activity towards 9-cis, 11-cis and all-trans-retinol, and to a lesser extent on 13-cis-retinol (PubMed:12226107, PubMed:12036956, PubMed:29410696). Exhibits a low reductive activity towards unsaturated medium-chain aldehydes such as cis -6-nonenal and no activity toward nonanal or 4-hydroxy-nonenal (PubMed:15865448). Has no deh…	0.724689
102007	0.108068	3.54978	g1136	Sc4wPfr_90	235755	236139	sp|Q8TC12|RDH11_HUMAN	Retinol dehydrogenase with a clear preference for NADP. Displays high activity towards 9-cis, 11-cis and all-trans-retinol, and to a lesser extent on 13-cis-retinol (PubMed:12226107, PubMed:12036956, PubMed:29410696). Exhibits a low reductive activity towards unsaturated medium-chain aldehydes such as cis -6-nonenal and no activity toward nonanal or 4-hydroxy-nonenal (PubMed:15865448). Has no deh…	0.794567
102008	-0.00215283	4.35499	g1137	Sc4wPfr_90	260118	261021	sp|Q9HBH5|RDH14_HUMAN	Retinol dehydrogenase with a clear preference for NADP. Displays high activity towards 9-cis, 11-cis and all-trans-retinol. Shows a very weak activity towards 13-cis-retinol. Has no activity towards steroid.	0.996137
10201	-0.430628	4.03865	g29711	Sc4wPfr_1214	141901	145931	sp|Q9BTV6|DPH7_HUMAN	Catalyzes the demethylation of diphthine methyl ester to form diphthine, an intermediate diphthamide biosynthesis, a post-translational modification of histidine which occurs in translation elongation factor 2 (EEF2) which can be ADP-ribosylated by diphtheria toxin and by Pseudomonas exotoxin A (Eta).	0.115998
102011	-0.0207493	5.41639	g1137	Sc4wPfr_90	276428	276996	sp|Q9HBH5|RDH14_HUMAN	Retinol dehydrogenase with a clear preference for NADP. Displays high activity towards 9-cis, 11-cis and all-trans-retinol. Shows a very weak activity towards 13-cis-retinol. Has no activity towards steroid.	0.949311
102013	0.0786729	4.83264	g1137	Sc4wPfr_90	284104	284739	sp|Q9HBH5|RDH14_HUMAN	Retinol dehydrogenase with a clear preference for NADP. Displays high activity towards 9-cis, 11-cis and all-trans-retinol. Shows a very weak activity towards 13-cis-retinol. Has no activity towards steroid.	0.770325
102015	-0.0256461	4.20779	g1137	Sc4wPfr_90	287261	287944	sp|Q9HBH5|RDH14_HUMAN	Retinol dehydrogenase with a clear preference for NADP. Displays high activity towards 9-cis, 11-cis and all-trans-retinol. Shows a very weak activity towards 13-cis-retinol. Has no activity towards steroid.	0.957347
102017	-0.115499	3.85937	g1137	Sc4wPfr_90	295756	296104	sp|Q9HBH5|RDH14_HUMAN	Retinol dehydrogenase with a clear preference for NADP. Displays high activity towards 9-cis, 11-cis and all-trans-retinol. Shows a very weak activity towards 13-cis-retinol. Has no activity towards steroid.	0.685287
102018	-0.0347261	4.16716	g1137	Sc4wPfr_90	298239	299359	sp|Q9HBH5|RDH14_HUMAN	Retinol dehydrogenase with a clear preference for NADP. Displays high activity towards 9-cis, 11-cis and all-trans-retinol. Shows a very weak activity towards 13-cis-retinol. Has no activity towards steroid.	0.919992
102022	0.114908	4.09504	g1139	Sc4wPfr_90	340685	341569			0.681593
102024	0.00430776	3.81762	g1139	Sc4wPfr_90	348308	349914			0.993528
102031	0.188559	4.08521	g1140	Sc4wPfr_90	371728	372153	sp|G3V9H8|RET_RAT	Receptor tyrosine-protein kinase involved in numerous cellular mechanisms including cell proliferation, neuronal navigation, cell migration, and cell differentiation upon binding with glial cell derived neurotrophic factor family ligands. Phosphorylates PTK2/FAK1. Regulates both cell death/survival balance and positional information. Required for the molecular mechanisms orchestration during inte…	0.521636
102032	0.0494451	4.50679	g1140	Sc4wPfr_90	372838	374094	sp|G3V9H8|RET_RAT	Receptor tyrosine-protein kinase involved in numerous cellular mechanisms including cell proliferation, neuronal navigation, cell migration, and cell differentiation upon binding with glial cell derived neurotrophic factor family ligands. Phosphorylates PTK2/FAK1. Regulates both cell death/survival balance and positional information. Required for the molecular mechanisms orchestration during inte…	0.884934
102033	0.0973678	5.38275	g1140	Sc4wPfr_90	375760	376734	sp|G3V9H8|RET_RAT	Receptor tyrosine-protein kinase involved in numerous cellular mechanisms including cell proliferation, neuronal navigation, cell migration, and cell differentiation upon binding with glial cell derived neurotrophic factor family ligands. Phosphorylates PTK2/FAK1. Regulates both cell death/survival balance and positional information. Required for the molecular mechanisms orchestration during inte…	0.579341
102038	0.0202116	5.46266	g1141	Sc4wPfr_90	435542	436173	sp|D2IYS2|TORSO_BOMMO	Probable receptor tyrosine kinase. During postembryonic development, involved in the initiation of metamorphosis probably by inducing the production of ecdysone in response to prothoracicotropic hormone (PTTH) (By similarity). Binding to PTTH stimulates activation of canonical MAPK signaling leading to ERK phosphorylation (PubMed:19965758, PubMed:26928300).	0.958628
102039	0.260994	3.48568	g1141	Sc4wPfr_90	440758	441918	sp|D2IYS2|TORSO_BOMMO	Probable receptor tyrosine kinase. During postembryonic development, involved in the initiation of metamorphosis probably by inducing the production of ecdysone in response to prothoracicotropic hormone (PTTH) (By similarity). Binding to PTTH stimulates activation of canonical MAPK signaling leading to ERK phosphorylation (PubMed:19965758, PubMed:26928300).	0.18531
102042	0.157135	6.18209	g1143	Sc4wPfr_90	674907	675719	sp|Q60997|DMBT1_MOUSE	May play roles in mucosal defense system and cellular immune defense. May play a role in liver regeneration. May be an important factor in fate decision and differentiation of transit-amplifying ductular (oval) cells within the hepatic lineage. May function as a binding protein in saliva for the regulation of taste sensation. May play a role as an opsonin receptor for SFTPD and SPAR in macrophage…	0.121035
102043	0.399973	4.24282	g1143	Sc4wPfr_90	679765	681148	sp|Q60997|DMBT1_MOUSE	May play roles in mucosal defense system and cellular immune defense. May play a role in liver regeneration. May be an important factor in fate decision and differentiation of transit-amplifying ductular (oval) cells within the hepatic lineage. May function as a binding protein in saliva for the regulation of taste sensation. May play a role as an opsonin receptor for SFTPD and SPAR in macrophage…	0.00319447
102049	0.00583696	4.09022	g1145	Sc4wPfr_90	733631	734235	sp|P35546|RET_MOUSE	Receptor tyrosine-protein kinase involved in numerous cellular mechanisms including cell proliferation, neuronal navigation, cell migration, and cell differentiation upon binding with glial cell derived neurotrophic factor family ligands. Phosphorylates PTK2/FAK1. Regulates both cell death/survival balance and positional information. Required for the molecular mechanisms orchestration during inte…	0.990354
10205	-0.165062	3.0565	g29711	Sc4wPfr_1214	166098	166984	sp|Q9BTV6|DPH7_HUMAN	Catalyzes the demethylation of diphthine methyl ester to form diphthine, an intermediate diphthamide biosynthesis, a post-translational modification of histidine which occurs in translation elongation factor 2 (EEF2) which can be ADP-ribosylated by diphtheria toxin and by Pseudomonas exotoxin A (Eta).	0.777138
102051	0.251807	3.40978	g1145	Sc4wPfr_90	749890	750538	sp|P35546|RET_MOUSE	Receptor tyrosine-protein kinase involved in numerous cellular mechanisms including cell proliferation, neuronal navigation, cell migration, and cell differentiation upon binding with glial cell derived neurotrophic factor family ligands. Phosphorylates PTK2/FAK1. Regulates both cell death/survival balance and positional information. Required for the molecular mechanisms orchestration during inte…	0.194299
102053	-0.0795204	3.78996	g1145	Sc4wPfr_90	793660	794542	sp|P35546|RET_MOUSE	Receptor tyrosine-protein kinase involved in numerous cellular mechanisms including cell proliferation, neuronal navigation, cell migration, and cell differentiation upon binding with glial cell derived neurotrophic factor family ligands. Phosphorylates PTK2/FAK1. Regulates both cell death/survival balance and positional information. Required for the molecular mechanisms orchestration during inte…	0.883136
102054	0.0123675	3.58359	g1145	Sc4wPfr_90	811379	812814	sp|P35546|RET_MOUSE	Receptor tyrosine-protein kinase involved in numerous cellular mechanisms including cell proliferation, neuronal navigation, cell migration, and cell differentiation upon binding with glial cell derived neurotrophic factor family ligands. Phosphorylates PTK2/FAK1. Regulates both cell death/survival balance and positional information. Required for the molecular mechanisms orchestration during inte…	0.980427
102057	0.141841	4.66501	g1146	Sc4wPfr_90	845050	846100	sp|Q498D6|FGFR4_RAT	Tyrosine-protein kinase that acts as cell-surface receptor for fibroblast growth factors and plays a role in the regulation of cell proliferation, differentiation and migration, and in regulation of lipid metabolism, bile acid biosynthesis, glucose uptake, vitamin D metabolism and phosphate homeostasis. Required for normal down-regulation of the expression of CYP7A1, the rate-limiting enzyme in b…	0.422253
10206	0.00807548	4.00018	g29711	Sc4wPfr_1214	169266	170324	sp|Q9BTV6|DPH7_HUMAN	Catalyzes the demethylation of diphthine methyl ester to form diphthine, an intermediate diphthamide biosynthesis, a post-translational modification of histidine which occurs in translation elongation factor 2 (EEF2) which can be ADP-ribosylated by diphtheria toxin and by Pseudomonas exotoxin A (Eta).	0.988553
102060	-0.139847	3.19069	g1146	Sc4wPfr_90	957863	958793	sp|Q498D6|FGFR4_RAT	Tyrosine-protein kinase that acts as cell-surface receptor for fibroblast growth factors and plays a role in the regulation of cell proliferation, differentiation and migration, and in regulation of lipid metabolism, bile acid biosynthesis, glucose uptake, vitamin D metabolism and phosphate homeostasis. Required for normal down-regulation of the expression of CYP7A1, the rate-limiting enzyme in b…	0.814404
102062	0.0862649	5.02373	g1148	Sc4wPfr_90	1015434	1016006			0.729569
102068	-0.0862675	4.80988	g1152	Sc4wPfr_90	1061411	1062566			0.775338
102077	-0.0200596	3.55844	g1155	Sc4wPfr_90	1151564	1153127	sp|Q86HQ2|ABCG8_DICDI		0.965505
102079	0.163039	3.71199	g1155	Sc4wPfr_90	1176297	1177319	sp|Q86HQ2|ABCG8_DICDI		0.636099
102080	-0.00181949	4.33857	g1155	Sc4wPfr_90	1181128	1181790	sp|Q86HQ2|ABCG8_DICDI		0.996626
102083	-0.0942977	4.60704	g1155	Sc4wPfr_90	1185871	1186463	sp|Q86HQ2|ABCG8_DICDI		0.769523
102085	0.0328335	4.61551	g1155	Sc4wPfr_90	1189736	1190641	sp|Q86HQ2|ABCG8_DICDI		0.937914
102086	-0.113924	5.75776	g1155	Sc4wPfr_90	1191601	1192315	sp|Q86HQ2|ABCG8_DICDI		0.68212
10209	-0.0831245	3.50031	g29711	Sc4wPfr_1214	180136	182147	sp|Q9BTV6|DPH7_HUMAN	Catalyzes the demethylation of diphthine methyl ester to form diphthine, an intermediate diphthamide biosynthesis, a post-translational modification of histidine which occurs in translation elongation factor 2 (EEF2) which can be ADP-ribosylated by diphtheria toxin and by Pseudomonas exotoxin A (Eta).	0.841492
102092	0.261577	3.82096	g1158	Sc4wPfr_90	1230102	1230800			0.250861
102094	0.0535971	5.583	g1164	Sc4wPfr_90	1248194	1248970			0.829357
102096	0.0416928	4.90767	g1166	Sc4wPfr_90	1259065	1259436			0.897378
102097	0.0373578	7.18874	g1166	Sc4wPfr_90	1262367	1262880			0.873675
102098	0.028676	4.14812	g1166	Sc4wPfr_90	1264525	1264811			0.943366
1021	-0.1421	4.34607	g13519	Sc4wPfr_1010	331360	332445	sp|Q7M456|RNOY_CRAGI	Releases mononucleotides from RNA in the order of 3'-GMP, 3'-AMP and 3'-UMP.	0.392834
102104	-0.0376627	3.68956	g1171	Sc4wPfr_90	1343915	1344650	sp|Q9R1P4|PSA1_MOUSE	Component of the 20S core proteasome complex involved in the proteolytic degradation of most intracellular proteins. This complex plays numerous essential roles within the cell by associating with different regulatory particles. Associated with two 19S regulatory particles, forms the 26S proteasome and thus participates in the ATP-dependent degradation of ubiquitinated proteins. The 26S proteasom…	0.925732
102108	0.136741	4.64821	g1174	Sc4wPfr_90	1373956	1374926	sp|O15230|LAMA5_HUMAN	Binding to cells via a high affinity receptor, laminin is thought to mediate the attachment, migration and organization of cells into tissues during embryonic development by interacting with other extracellular matrix components.	0.593461
102110	0.134969	5.08871	g1175	Sc4wPfr_90	1387290	1388742	sp|A6QNK1|G3ST1_BOVIN	Catalyzes the sulfation of membrane glycolipids. Seems to prefer beta-glycosides at the non-reducing termini of sugar chains attached to a lipid moiety. Catalyzes the synthesis of HSO3-3-galactosylceramide (sulfatide), a major lipid component of the myelin sheath and of HSO3-3-monogalactosylalkylacylglycerol (seminolipid), present in spermatocytes. Also acts on lactosylceramide, galactosyl 1-alky…	0.687195
102116	0.00147455	3.51761	g1177	Sc4wPfr_90	1473720	1474477	sp|Q00174|LAMA_DROME	Binding to cells via a high affinity receptor, laminin is thought to mediate the attachment, migration and organization of cells into tissues during embryonic development by interacting with other extracellular matrix components. Activates presynaptic signaling involving integrin alpha-PS3/beta-nu and Fak to suppress neuromuscular junction (NMJ) growth during larval development and during low cra…	0.997764
102117	0.0749823	4.46141	g1177	Sc4wPfr_90	1476494	1477129	sp|Q00174|LAMA_DROME	Binding to cells via a high affinity receptor, laminin is thought to mediate the attachment, migration and organization of cells into tissues during embryonic development by interacting with other extracellular matrix components. Activates presynaptic signaling involving integrin alpha-PS3/beta-nu and Fak to suppress neuromuscular junction (NMJ) growth during larval development and during low cra…	0.851752
102118	0.00973405	3.31533	g1177	Sc4wPfr_90	1478369	1478657	sp|Q00174|LAMA_DROME	Binding to cells via a high affinity receptor, laminin is thought to mediate the attachment, migration and organization of cells into tissues during embryonic development by interacting with other extracellular matrix components. Activates presynaptic signaling involving integrin alpha-PS3/beta-nu and Fak to suppress neuromuscular junction (NMJ) growth during larval development and during low cra…	0.988553
10212	-0.027726	4.92958	g29718	Sc4wPfr_1214	210977	212349			0.929822
102120	0.0694567	5.33998	g1177	Sc4wPfr_90	1531420	1532157	sp|Q00174|LAMA_DROME	Binding to cells via a high affinity receptor, laminin is thought to mediate the attachment, migration and organization of cells into tissues during embryonic development by interacting with other extracellular matrix components. Activates presynaptic signaling involving integrin alpha-PS3/beta-nu and Fak to suppress neuromuscular junction (NMJ) growth during larval development and during low cra…	0.718255
102121	0.0981019	4.65362	g1177	Sc4wPfr_90	1542357	1545154	sp|Q00174|LAMA_DROME	Binding to cells via a high affinity receptor, laminin is thought to mediate the attachment, migration and organization of cells into tissues during embryonic development by interacting with other extracellular matrix components. Activates presynaptic signaling involving integrin alpha-PS3/beta-nu and Fak to suppress neuromuscular junction (NMJ) growth during larval development and during low cra…	0.754335
102128	-0.0298889	5.04577	g1183	Sc4wPfr_90	1679295	1680073			0.920833
10213	-0.0555769	3.89622	g29718	Sc4wPfr_1214	220992	221492			0.887284
102133	-0.04246	4.35278	g1186	Sc4wPfr_90	1717073	1718265			0.903846
102139	-0.0900486	3.65652	g1193	Sc4wPfr_90	1747219	1747865	sp|Q15650|TRIP4_HUMAN	Transcription coactivator which associates with nuclear receptors, transcriptional coactivators including EP300, CREBBP and NCOA1, and basal transcription factors like TBP and TFIIA to facilitate nuclear receptors-mediated transcription. May thereby play an important role in establishing distinct coactivator complexes under different cellular conditions. Plays a role in thyroid hormone receptor a…	0.823617
102140	0.0942423	4.06218	g1193	Sc4wPfr_90	1751512	1752539	sp|Q15650|TRIP4_HUMAN	Transcription coactivator which associates with nuclear receptors, transcriptional coactivators including EP300, CREBBP and NCOA1, and basal transcription factors like TBP and TFIIA to facilitate nuclear receptors-mediated transcription. May thereby play an important role in establishing distinct coactivator complexes under different cellular conditions. Plays a role in thyroid hormone receptor a…	0.740528
102141	0.0352964	4.88599	g1193	Sc4wPfr_90	1838297	1839160	sp|Q15650|TRIP4_HUMAN	Transcription coactivator which associates with nuclear receptors, transcriptional coactivators including EP300, CREBBP and NCOA1, and basal transcription factors like TBP and TFIIA to facilitate nuclear receptors-mediated transcription. May thereby play an important role in establishing distinct coactivator complexes under different cellular conditions. Plays a role in thyroid hormone receptor a…	0.914128
102142	-0.0580625	5.02674	g1194	Sc4wPfr_90	1873448	1873801			0.834387
102143	-0.176752	4.13918	g1194	Sc4wPfr_90	1880327	1881167			0.359005
102144	-0.0602207	4.72036	g1197	Sc4wPfr_90	1893312	1894351			0.826414
102147	0.642925	3.1979	g1199	Sc4wPfr_90	1948940	1949868	sp|P42674|BP10_PARLI	Could be involved in the differentiation of ectodermal lineages and subsequent patterning of the embryo.	0.00216965
10215	0.0466897	4.16693	g29718	Sc4wPfr_1214	226874	228010			0.91866
102150	0.00933574	5.12303	g1201	Sc4wPfr_90	1966205	1967276	sp|Q8C1W1|VASH1_MOUSE	Tyrosine carboxypeptidase that removes the C-terminal tyrosine residue of alpha-tubulin, thereby regulating microtubule dynamics and function (PubMed:29146868). Acts as an angiogenesis inhibitor: inhibits migration, proliferation and network formation by endothelial cells as well as angiogenesis (PubMed:19204325). This inhibitory effect is selective to endothelial cells as it does not affect the …	0.979162
102153	-0.0726149	3.59813	g1203	Sc4wPfr_90	2000431	2002533			0.887703
102156	0.709923	2.97707	g1205	Sc4wPfr_90	2064389	2065052			0.00132879
102158	0.288849	3.46949	g1205	Sc4wPfr_90	2073410	2074023			0.0796676
10216	-0.0390875	5.87949	g29717	Sc4wPfr_1214	245397	246259			0.862495
102162	-0.0505549	4.47939	g1206	Sc4wPfr_90	2136630	2137762			0.893109
102168	-0.0049359	3.71316	g7880	Sc4wPfr_900	18985	20121			0.993623
102172	-0.0560135	5.1238	g7882	Sc4wPfr_900	51455	52332			0.848751
102175	-0.329105	3.63155	g7882	Sc4wPfr_900	59873	62882			0.267231
102197	-0.122014	4.71004	g7887	Sc4wPfr_900	223364	223976			0.580108
102198	0.294932	3.27122		Sc4wPfr_901	1189	2189			0.264266
10220	-0.0687187	5.1107	g29726	Sc4wPfr_1214	320277	321949			0.839055
102203	0.42077	3.2444	g3593	Sc4wPfr_904	83788	84639			0.0231106
102209	-0.00887712	5.42871	g215	Sc4wPfr_906	9108	10037			0.977075
10221	0.262334	3.38705	g29727	Sc4wPfr_1214	330220	330778	sp|Q64620|PPP6_RAT	Catalytic subunit of protein phosphatase 6 (PP6). PP6 is a component of a signaling pathway regulating cell cycle progression in response to IL2 receptor stimulation. N-terminal domain restricts G1 to S phase progression in cancer cells, in part through control of cyclin D1. During mitosis, regulates spindle positioning. Downregulates MAP3K7 kinase activation of the IL1 signaling pathway by depho…	0.321181
102211	-0.078986	4.08864	g216	Sc4wPfr_906	18040	19285			0.786245
102213	-0.0772439	3.76425	g216	Sc4wPfr_906	26334	27937			0.86335
102214	0.0197305	4.76549	g216	Sc4wPfr_906	33096	33998			0.948928
102217	0.137769	4.92346	g216	Sc4wPfr_906	52766	53401			0.381941
102218	0.00777697	5.31807	g216	Sc4wPfr_906	55930	56540			0.983615
102219	0.156485	3.58785	g2392	Sc4wPfr_906.1	45631	46118	sp|Q5TKA1|LIN9_HUMAN	Acts as a tumor suppressor. Inhibits DNA synthesis. Its ability to inhibit oncogenic transformation is mediated through its association with RB1. Plays a role in the expression of genes required for the G1/S transition.	0.57461
102221	0.122994	4.50987	g2395	Sc4wPfr_906.1	121799	123232	sp|Q86UT8|CCD84_HUMAN		0.616068
102222	0.00948002	3.68866	g2397	Sc4wPfr_906.1	159357	159976			0.985273
102223	-0.0426183	4.06668	g2397	Sc4wPfr_906.1	162252	163026			0.897722
102226	0.242195	3.34137	g2398	Sc4wPfr_906.1	173354	173736	sp|D3YXG0|HMCN1_MOUSE	Promotes cleavage furrow maturation during cytokinesis in preimplantation embryos (PubMed:21215633). May play a role in the architecture of adhesive and flexible epithelial cell junctions (PubMed:17015624). May play a role during myocardial remodeling by imparting an effect on cardiac fibroblast migration (PubMed:24951538).	0.424941
102230	0.140629	4.37665	g2400	Sc4wPfr_906.1	282107	283290	sp|E2JA28|DDAC_ENTAG	Involved in dapdiamide antibiotics biosynthesis. Catalyzes the alpha-ketoglutarate-dependent epoxidation of the covalently bound N-beta-fumaramoyl-DAP-S-DdaD to generate N-beta-epoxysuccinamoyl-DAP in thioester linkage to DdaD.	0.509031
102231	0.0193379	3.94228	g2400	Sc4wPfr_906.1	284825	286055	sp|E2JA28|DDAC_ENTAG	Involved in dapdiamide antibiotics biosynthesis. Catalyzes the alpha-ketoglutarate-dependent epoxidation of the covalently bound N-beta-fumaramoyl-DAP-S-DdaD to generate N-beta-epoxysuccinamoyl-DAP in thioester linkage to DdaD.	0.966386
102235	-0.0807726	4.19095	g9027	Sc4wPfr_907	35562	36953			0.735984
102237	0.0170071	5.20742	g9029	Sc4wPfr_907	44662	45252			0.95937
10226	0.125328	4.7599	g29727	Sc4wPfr_1214	383814	385040	sp|Q64620|PPP6_RAT	Catalytic subunit of protein phosphatase 6 (PP6). PP6 is a component of a signaling pathway regulating cell cycle progression in response to IL2 receptor stimulation. N-terminal domain restricts G1 to S phase progression in cancer cells, in part through control of cyclin D1. During mitosis, regulates spindle positioning. Downregulates MAP3K7 kinase activation of the IL1 signaling pathway by depho…	0.516453
102261	-0.0124272	5.59761	g21198	Sc4wPfr_908	101254	102477			0.977815
102262	0.103386	6.05786	g21198	Sc4wPfr_908	110217	111462			0.548355
102264	-0.00645971	5.09249	g21199	Sc4wPfr_908	129451	130051	sp|Q15334|L2GL1_HUMAN	Cortical cytoskeleton protein found in a complex involved in maintaining cell polarity and epithelial integrity. Involved in the regulation of mitotic spindle orientation, proliferation, differentiation and tissue organization of neuroepithelial cells. Involved in axonogenesis through RAB10 activation thereby regulating vesicular membrane trafficking toward the axonal plasma membrane.	0.987136
10227	-0.0458842	5.20336	g29727	Sc4wPfr_1214	385396	386145	sp|Q64620|PPP6_RAT	Catalytic subunit of protein phosphatase 6 (PP6). PP6 is a component of a signaling pathway regulating cell cycle progression in response to IL2 receptor stimulation. N-terminal domain restricts G1 to S phase progression in cancer cells, in part through control of cyclin D1. During mitosis, regulates spindle positioning. Downregulates MAP3K7 kinase activation of the IL1 signaling pathway by depho…	0.873296
102276	0.0608231	5.4018	g21201	Sc4wPfr_908	204309	205348	sp|Q63430|CSDC2_RAT	RNA-binding factor which binds specifically to the very 3'-UTR ends of both histone H1 and H3.3 mRNAs, encompassing the polyadenylation signal. Might play a central role in the negative regulation of histone variant synthesis in the developing brain.	0.809691
102277	0.183539	3.45314	g21201	Sc4wPfr_908	209775	210436	sp|Q63430|CSDC2_RAT	RNA-binding factor which binds specifically to the very 3'-UTR ends of both histone H1 and H3.3 mRNAs, encompassing the polyadenylation signal. Might play a central role in the negative regulation of histone variant synthesis in the developing brain.	0.674311
102278	0.105784	3.46235	g21202	Sc4wPfr_908	219354	220223			0.820427
102283	0.415568	3.66602	g21203	Sc4wPfr_908	243841	245061			0.0686754
102286	-0.0113421	4.46863	g21203	Sc4wPfr_908	251690	253077			0.982167
10229	0.0820292	3.50046	g29728	Sc4wPfr_1214	441083	441393	sp|B2RX88|CSPP1_MOUSE	May play a role in cell-cycle-dependent microtubule organization.	0.892732
102293	-0.142725	5.76984	g21205	Sc4wPfr_908	291509	292471	sp|Q6ZMB5|T184A_HUMAN	Acts as a heparin receptor in vascular cells (By similarity). May be involved in vesicle transport in exocrine cells and Sertoli cells (By similarity).	0.238075
102299	0.00918172	3.97749	g21206	Sc4wPfr_908	354298	354916	sp|Q8C753|K0556_MOUSE	May influence the stability of microtubules (MT), possibly through interaction with the MT-severing katanin complex.	0.990179
102300	-0.0375215	5.06975	g21207	Sc4wPfr_908	372636	373590	sp|Q8C753|K0556_MOUSE	May influence the stability of microtubules (MT), possibly through interaction with the MT-severing katanin complex.	0.902282
102302	0.180753	3.94718	g21207	Sc4wPfr_908	378459	380460	sp|Q8C753|K0556_MOUSE	May influence the stability of microtubules (MT), possibly through interaction with the MT-severing katanin complex.	0.532638
102303	-0.0159795	5.31987	g21208	Sc4wPfr_908	385030	385712	sp|P26369|U2AF2_MOUSE	Plays a role in pre-mRNA splicing and 3'-end processing. By recruiting PRPF19 and the PRP19C/Prp19 complex/NTC/Nineteen complex to the RNA polymerase II C-terminal domain (CTD), and thereby pre-mRNA, may couple transcription to splicing. Required for the export of mRNA out of the nucleus, even if the mRNA is encoded by an intron-less gene. Positively regulates pre-mRNA 3'-end processing by recrui…	0.957142
102307	-0.172456	4.08118	g21209	Sc4wPfr_908	414139	415076			0.336427
102308	0.0234768	3.76277	g21209	Sc4wPfr_908	415852	416340			0.950872
102309	-0.058531	5.80072	g21209	Sc4wPfr_908	424665	425623			0.755368
102312	0.154972	4.16591	g21209	Sc4wPfr_908	449814	450490			0.506367
102314	-0.323332	4.05105	g21209	Sc4wPfr_908	455868	457431			0.115586
102315	-0.13456	4.54138	g21209	Sc4wPfr_908	457803	460115			0.587776
102325	-0.199521	3.89144	g21212	Sc4wPfr_908	545818	546521			0.421229
102326	-0.257403	4.37751	g21212	Sc4wPfr_908	552992	553866			0.166549
102329	0.0606248	4.8954	g21214	Sc4wPfr_908	563210	564829			0.812912
102337	-1.32393	4.54245	g21219	Sc4wPfr_908	663077	664264	sp|Q90623|MYPT1_CHICK	Regulates myosin phosphatase activity.	6.58043e-14
102340	-0.0298848	5.07727	g21220	Sc4wPfr_908	673882	674478			0.946896
102341	-0.0833115	5.43296	g21220	Sc4wPfr_908	675044	676255			0.793396
102343	0.102621	4.34226	g21220	Sc4wPfr_908	705842	706981			0.697544
102345	0.11935	4.71107	g21220	Sc4wPfr_908	733772	734999			0.705682
102349	-0.259656	3.48761	g21221	Sc4wPfr_908	745480	746207			0.360117
102353	-0.126221	3.40524	g21221	Sc4wPfr_908	788350	789019			0.660897
102355	0.289196	3.82493	g21221	Sc4wPfr_908	791507	792643			0.116408
102356	0.188242	4.96405	g21221	Sc4wPfr_908	797560	798760			0.348444
102357	0.179887	4.84215	g21221	Sc4wPfr_908	803426	804516			0.343759
10236	-0.0651788	4.98239	g29734	Sc4wPfr_1214	542625	543712	sp|Q4R6C2|ZN383_MACFA	May function as a transcriptional repressor, suppressing transcriptional activities mediated by MAPK signaling pathways.	0.79123
102363	-0.409346	3.30489	g21222	Sc4wPfr_908	842792	843523	sp|Q7LHG5|YI31B_YEAST	Capsid protein (CA) is the structural component of the virus-like particle (VLP), forming the shell that encapsulates the genomic RNA-nucleocapsid complex.	0.29735
102367	0.189205	4.07429	g21224	Sc4wPfr_908	851870	852799			0.316134
10237	0.195456	3.60169	g29734	Sc4wPfr_1214	550913	552700	sp|Q4R6C2|ZN383_MACFA	May function as a transcriptional repressor, suppressing transcriptional activities mediated by MAPK signaling pathways.	0.45601
102371	-0.141893	3.27455	g21226	Sc4wPfr_908	866787	868744			0.722825
102373	-0.078984	3.21484	g21226	Sc4wPfr_908	874174	875117			0.8698
102379	0.0753323	3.82738	g21227	Sc4wPfr_908	916829	918638			0.849852
102385	-0.104569	3.51361	g21227	Sc4wPfr_908	968111	969225			0.78166
102387	-0.00119136	5.21393	g21227	Sc4wPfr_908	988031	989449			0.997926
102391	0.0656296	4.6596	g21228	Sc4wPfr_908	1010656	1011690	sp|O88281|MEGF6_RAT		0.892564
102399	0.128299	5.02339	g21228	Sc4wPfr_908	1101427	1103190	sp|O88281|MEGF6_RAT		0.577393
1024	-0.152606	3.43122	g13519	Sc4wPfr_1010	366129	366616	sp|Q7M456|RNOY_CRAGI	Releases mononucleotides from RNA in the order of 3'-GMP, 3'-AMP and 3'-UMP.	0.718479
102403	-0.0242755	6.47793	g33475	Sc4wPfr_909	10101	12023	sp|Q9NBX4|RTXE_DROME		0.899718
102406	-0.078851	3.39528	g33476	Sc4wPfr_909	57216	58850			0.886914
102413	-0.433467	5.01008	g33476	Sc4wPfr_909	70121	72139			0.0050788
102419	0.0651501	4.29103	g33477	Sc4wPfr_909	85128	85496	sp|Q24799|MYPH_ECHGR		0.874213
102420	-0.0791185	5.30624	g33477	Sc4wPfr_909	88491	89014	sp|Q24799|MYPH_ECHGR		0.710285
102421	-0.210245	6.15863	g33477	Sc4wPfr_909	89471	90011	sp|Q24799|MYPH_ECHGR		0.0344511
102422	-0.130658	5.01806	g33477	Sc4wPfr_909	90281	90803	sp|Q24799|MYPH_ECHGR		0.57568
102423	0.411937	4.10078	g33477	Sc4wPfr_909	91425	91713	sp|Q24799|MYPH_ECHGR		0.00444411
102424	-0.145138	4.97665	g33477	Sc4wPfr_909	92023	92944	sp|Q24799|MYPH_ECHGR		0.323847
102427	0.0354851	3.54932	g33478	Sc4wPfr_909	122065	123845	sp|Q9BUN5|CC28B_HUMAN	Involved in ciliogenesis. Regulates cilia length through its interaction with MAPKAP1/SIN1 but independently of mTORC2 complex. Modulates mTORC2 complex assembly and function, possibly enhances AKT1 phosphorylation. Does not seem to modulate assembly and function of mTORC1 complex.	0.938124
10243	0.146217	3.88609	g29740	Sc4wPfr_1214	650292	651329	sp|P33610|PRI2_MOUSE	DNA primase is the polymerase that synthesizes small RNA primers for the Okazaki fragments made during discontinuous DNA replication.	0.709517
102433	-0.0465039	5.33456	g33491	Sc4wPfr_909	267054	269066			0.842818
102436	-0.222696	3.7737	g33492	Sc4wPfr_909	294801	295633			0.464571
102438	-0.142267	5.45726	g33492	Sc4wPfr_909	303777	305540			0.527342
102440	-0.0523062	3.29052	g33492	Sc4wPfr_909	308268	308576			0.934534
102441	0.0774477	5.2993	g33492	Sc4wPfr_909	310416	311262			0.841299
10245	0.730177	4.85937	g29740	Sc4wPfr_1214	669613	671156	sp|P33610|PRI2_MOUSE	DNA primase is the polymerase that synthesizes small RNA primers for the Okazaki fragments made during discontinuous DNA replication.	8.72369e-08
102450	-0.00990615	5.69001	g33493	Sc4wPfr_909	356487	357501	sp|B3LYS5|FOXO_DROAN	Transcription factor involved in the regulation of the insulin signaling pathway. Consistently activates both the downstream target Thor\d4EBP and the feedback control target InR. Involved in negative regulation of the cell cycle, modulating cell growth and proliferation. In response to cellular stresses, such as nutrient deprivation or increased levels of reactive oxygen species, foxo is activat…	0.981061
102451	0.31531	3.80272	g33493	Sc4wPfr_909	369119	370332	sp|B3LYS5|FOXO_DROAN	Transcription factor involved in the regulation of the insulin signaling pathway. Consistently activates both the downstream target Thor\d4EBP and the feedback control target InR. Involved in negative regulation of the cell cycle, modulating cell growth and proliferation. In response to cellular stresses, such as nutrient deprivation or increased levels of reactive oxygen species, foxo is activat…	0.175899
102452	0.27061	3.48021	g33493	Sc4wPfr_909	373555	373917	sp|B3LYS5|FOXO_DROAN	Transcription factor involved in the regulation of the insulin signaling pathway. Consistently activates both the downstream target Thor\d4EBP and the feedback control target InR. Involved in negative regulation of the cell cycle, modulating cell growth and proliferation. In response to cellular stresses, such as nutrient deprivation or increased levels of reactive oxygen species, foxo is activat…	0.272457
102453	-0.0384573	5.66842	g33493	Sc4wPfr_909	376192	377018	sp|B3LYS5|FOXO_DROAN	Transcription factor involved in the regulation of the insulin signaling pathway. Consistently activates both the downstream target Thor\d4EBP and the feedback control target InR. Involved in negative regulation of the cell cycle, modulating cell growth and proliferation. In response to cellular stresses, such as nutrient deprivation or increased levels of reactive oxygen species, foxo is activat…	0.902853
102454	0.00595448	5.37351	g33493	Sc4wPfr_909	388451	388990	sp|B3LYS5|FOXO_DROAN	Transcription factor involved in the regulation of the insulin signaling pathway. Consistently activates both the downstream target Thor\d4EBP and the feedback control target InR. Involved in negative regulation of the cell cycle, modulating cell growth and proliferation. In response to cellular stresses, such as nutrient deprivation or increased levels of reactive oxygen species, foxo is activat…	0.987048
102455	0.0381191	7.38262	g33493	Sc4wPfr_909	391169	392383	sp|B3LYS5|FOXO_DROAN	Transcription factor involved in the regulation of the insulin signaling pathway. Consistently activates both the downstream target Thor\d4EBP and the feedback control target InR. Involved in negative regulation of the cell cycle, modulating cell growth and proliferation. In response to cellular stresses, such as nutrient deprivation or increased levels of reactive oxygen species, foxo is activat…	0.836891
102459	-0.06027	3.24154	g33494	Sc4wPfr_909	419011	420345			0.916153
10246	0.647471	3.22059	g29740	Sc4wPfr_1214	671796	672626	sp|P33610|PRI2_MOUSE	DNA primase is the polymerase that synthesizes small RNA primers for the Okazaki fragments made during discontinuous DNA replication.	0.000798908
102460	-0.0112454	4.76703	g33494	Sc4wPfr_909	432017	435687			0.980052
102466	-0.008949	6.3201	g33497	Sc4wPfr_909	500446	501111	sp|Q01149|CO1A2_MOUSE	Type I collagen is a member of group I collagen (fibrillar forming collagen).	0.978331
102468	-0.234826	3.37973	g33498	Sc4wPfr_909	509505	510098			0.470501
102472	-0.0191955	4.97732	g23182	Sc4wPfr_91	8040	8770			0.949477
102474	-0.0607969	4.75728	g23183	Sc4wPfr_91	49542	50329			0.888799
102481	0.0758094	5.26726	g23185	Sc4wPfr_91	124361	125793	sp|Q8CFL8|ZSWM3_MOUSE		0.754182
102484	0.149617	3.22481	g23186	Sc4wPfr_91	137053	138248			0.648809
102486	0.203074	2.93804	g23186	Sc4wPfr_91	139305	140113			0.646081
102491	-0.220035	3.43296	g23186	Sc4wPfr_91	149012	149737			0.352109
102492	-0.038581	4.10311	g23186	Sc4wPfr_91	151684	152274			0.915471
102496	-0.114207	3.70956	g23187	Sc4wPfr_91	166038	166453			0.706573
102497	-0.0621694	5.04956	g23187	Sc4wPfr_91	168383	168948			0.826261
102498	-0.00675855	4.99818	g23187	Sc4wPfr_91	171587	172644			0.987603
1025	-0.0403729	6.57801	g13519	Sc4wPfr_1010	395092	396786	sp|Q7M456|RNOY_CRAGI	Releases mononucleotides from RNA in the order of 3'-GMP, 3'-AMP and 3'-UMP.	0.85478
10250	0.0123975	4.71082	g29741	Sc4wPfr_1214	694703	696440	sp|Q91YE6|IPO9_MOUSE	Functions in nuclear protein import as nuclear transport receptor (PubMed:11823430). Serves as receptor for nuclear localization signals (NLS) in cargo substrates (PubMed:11823430). Is thought to mediate docking of the importin/substrate complex to the nuclear pore complex (NPC) through binding to nucleoporin and the complex is subsequently translocated through the pore by an energy requiring, Ra…	0.974247
102501	-0.0380822	4.57948	g23187	Sc4wPfr_91	186170	187073			0.907263
102505	0.117922	4.22653	g23187	Sc4wPfr_91	198218	199327			0.63766
102507	-0.0694353	3.01598	g23187	Sc4wPfr_91	200585	201190			0.93253
102508	-0.00867996	6.09115	g23188	Sc4wPfr_91	210958	211953	sp|P31646|S6A13_RAT	Sodium-dependent GABA and taurine transporter. In presynaptic terminals, regulates GABA signaling termination through GABA uptake. In the liver, may be the major contributor for GABA uptake. Also involved in beta-alanine transport.	0.982566
102509	0.139818	3.60158	g23188	Sc4wPfr_91	212578	213046	sp|P31646|S6A13_RAT	Sodium-dependent GABA and taurine transporter. In presynaptic terminals, regulates GABA signaling termination through GABA uptake. In the liver, may be the major contributor for GABA uptake. Also involved in beta-alanine transport.	0.58318
102510	-0.175525	4.66586	g23188	Sc4wPfr_91	220706	221739	sp|P31646|S6A13_RAT	Sodium-dependent GABA and taurine transporter. In presynaptic terminals, regulates GABA signaling termination through GABA uptake. In the liver, may be the major contributor for GABA uptake. Also involved in beta-alanine transport.	0.338608
102511	-0.373487	3.99952	g23188	Sc4wPfr_91	225373	226010	sp|P31646|S6A13_RAT	Sodium-dependent GABA and taurine transporter. In presynaptic terminals, regulates GABA signaling termination through GABA uptake. In the liver, may be the major contributor for GABA uptake. Also involved in beta-alanine transport.	0.00695837
102512	0.0290063	6.71791	g23188	Sc4wPfr_91	229842	232526	sp|P31646|S6A13_RAT	Sodium-dependent GABA and taurine transporter. In presynaptic terminals, regulates GABA signaling termination through GABA uptake. In the liver, may be the major contributor for GABA uptake. Also involved in beta-alanine transport.	0.920834
102513	0.132005	4.87337	g23188	Sc4wPfr_91	232742	233545	sp|P31646|S6A13_RAT	Sodium-dependent GABA and taurine transporter. In presynaptic terminals, regulates GABA signaling termination through GABA uptake. In the liver, may be the major contributor for GABA uptake. Also involved in beta-alanine transport.	0.447897
102514	0.206074	4.3002	g23188	Sc4wPfr_91	237522	238181	sp|P31646|S6A13_RAT	Sodium-dependent GABA and taurine transporter. In presynaptic terminals, regulates GABA signaling termination through GABA uptake. In the liver, may be the major contributor for GABA uptake. Also involved in beta-alanine transport.	0.31191
102522	-0.0215829	5.02501	g23191	Sc4wPfr_91	319388	321173	sp|P47032|PRY1_YEAST	Secreted protein required for efficient export of lipids such as acetylated sterols. Acts in detoxification of hydrophobic compounds.	0.956216
102523	-0.101339	4.48427	g23191	Sc4wPfr_91	329315	331395	sp|P47032|PRY1_YEAST	Secreted protein required for efficient export of lipids such as acetylated sterols. Acts in detoxification of hydrophobic compounds.	0.73898
102526	0.154126	4.3763	g23193	Sc4wPfr_91	383182	385448	sp|P19246|NFH_MOUSE	Neurofilaments usually contain three intermediate filament proteins: L, M, and H which are involved in the maintenance of neuronal caliber. NF-H has an important function in mature axons that is not subserved by the two smaller NF proteins.	0.546669
102527	0.0134552	4.45319	g23193	Sc4wPfr_91	390120	390633	sp|P19246|NFH_MOUSE	Neurofilaments usually contain three intermediate filament proteins: L, M, and H which are involved in the maintenance of neuronal caliber. NF-H has an important function in mature axons that is not subserved by the two smaller NF proteins.	0.973995
102528	0.0924734	5.7255	g23193	Sc4wPfr_91	392262	393188	sp|P19246|NFH_MOUSE	Neurofilaments usually contain three intermediate filament proteins: L, M, and H which are involved in the maintenance of neuronal caliber. NF-H has an important function in mature axons that is not subserved by the two smaller NF proteins.	0.569885
102529	-0.0567117	4.66118	g23193	Sc4wPfr_91	393656	394004	sp|P19246|NFH_MOUSE	Neurofilaments usually contain three intermediate filament proteins: L, M, and H which are involved in the maintenance of neuronal caliber. NF-H has an important function in mature axons that is not subserved by the two smaller NF proteins.	0.828668
102534	-0.0456633	4.65199	g23194	Sc4wPfr_91	480108	480826	sp|Q06455|MTG8_HUMAN	Transcriptional corepressor which facilitates transcriptional repression via its association with DNA-binding transcription factors and recruitment of other corepressors and histone-modifying enzymes (PubMed:12559562, PubMed:15203199). Can repress the expression of MMP7 in a ZBTB33-dependent manner (PubMed:23251453). Can repress transactivation mediated by TCF12 (PubMed:16803958). Acts as a negat…	0.914197
102537	0.359481	4.02913	g23194	Sc4wPfr_91	488407	488940	sp|Q06455|MTG8_HUMAN	Transcriptional corepressor which facilitates transcriptional repression via its association with DNA-binding transcription factors and recruitment of other corepressors and histone-modifying enzymes (PubMed:12559562, PubMed:15203199). Can repress the expression of MMP7 in a ZBTB33-dependent manner (PubMed:23251453). Can repress transactivation mediated by TCF12 (PubMed:16803958). Acts as a negat…	0.0634574
102538	-0.119939	5.53888	g23194	Sc4wPfr_91	492337	493180	sp|Q06455|MTG8_HUMAN	Transcriptional corepressor which facilitates transcriptional repression via its association with DNA-binding transcription factors and recruitment of other corepressors and histone-modifying enzymes (PubMed:12559562, PubMed:15203199). Can repress the expression of MMP7 in a ZBTB33-dependent manner (PubMed:23251453). Can repress transactivation mediated by TCF12 (PubMed:16803958). Acts as a negat…	0.375177
102539	0.174169	4.94641	g23194	Sc4wPfr_91	496796	497824	sp|Q06455|MTG8_HUMAN	Transcriptional corepressor which facilitates transcriptional repression via its association with DNA-binding transcription factors and recruitment of other corepressors and histone-modifying enzymes (PubMed:12559562, PubMed:15203199). Can repress the expression of MMP7 in a ZBTB33-dependent manner (PubMed:23251453). Can repress transactivation mediated by TCF12 (PubMed:16803958). Acts as a negat…	0.547454
102541	-0.319586	4.64855	g23194	Sc4wPfr_91	506669	508257	sp|Q06455|MTG8_HUMAN	Transcriptional corepressor which facilitates transcriptional repression via its association with DNA-binding transcription factors and recruitment of other corepressors and histone-modifying enzymes (PubMed:12559562, PubMed:15203199). Can repress the expression of MMP7 in a ZBTB33-dependent manner (PubMed:23251453). Can repress transactivation mediated by TCF12 (PubMed:16803958). Acts as a negat…	0.00454541
102546	-0.0772421	3.60747	g23195	Sc4wPfr_91	533713	534452			0.84764
102547	0.11493	4.5051	g23195	Sc4wPfr_91	535560	536075			0.598591
102549	0.0509759	4.05247	g23195	Sc4wPfr_91	547286	547928			0.897378
10255	-0.119958	4.14032	g29742	Sc4wPfr_1214	802241	803495	sp|Q91YE6|IPO9_MOUSE	Functions in nuclear protein import as nuclear transport receptor (PubMed:11823430). Serves as receptor for nuclear localization signals (NLS) in cargo substrates (PubMed:11823430). Is thought to mediate docking of the importin/substrate complex to the nuclear pore complex (NPC) through binding to nucleoporin and the complex is subsequently translocated through the pore by an energy requiring, Ra…	0.705299
102550	0.35618	3.90516	g23195	Sc4wPfr_91	549789	550643			0.129748
102553	-0.235881	3.68987	g23196	Sc4wPfr_91	570135	571486			0.137994
102564	0.000264875	3.45929	g14829	Sc4wPfr_910	37	881	sp|A1DWM3|MFSD6_PIG		0.999554
102565	-0.0621024	3.55614	g14829	Sc4wPfr_910	5636	6483	sp|A1DWM3|MFSD6_PIG		0.892574
10257	0.11406	3.79422	g29742	Sc4wPfr_1214	807498	808779	sp|Q91YE6|IPO9_MOUSE	Functions in nuclear protein import as nuclear transport receptor (PubMed:11823430). Serves as receptor for nuclear localization signals (NLS) in cargo substrates (PubMed:11823430). Is thought to mediate docking of the importin/substrate complex to the nuclear pore complex (NPC) through binding to nucleoporin and the complex is subsequently translocated through the pore by an energy requiring, Ra…	0.752312
102571	0.443167	4.06818	g14829	Sc4wPfr_910	32715	33982	sp|A1DWM3|MFSD6_PIG		0.0111348
102572	-0.0209067	5.60378	g14829	Sc4wPfr_910	36817	37567	sp|A1DWM3|MFSD6_PIG		0.956389
102585	0.0670186	3.5364	g14830	Sc4wPfr_910	125069	125818			0.85864
102587	-0.0251386	3.77086	g14830	Sc4wPfr_910	137741	138879			0.96269
102588	-0.390173	3.40773	g14831	Sc4wPfr_910	143637	144805	sp|B0UYT5|MFD6B_DANRE		0.0840286
102589	-0.0939437	3.39794	g14831	Sc4wPfr_910	145844	146540	sp|B0UYT5|MFD6B_DANRE		0.814788
10259	0.112658	4.62779	g29742	Sc4wPfr_1214	823071	824102	sp|Q91YE6|IPO9_MOUSE	Functions in nuclear protein import as nuclear transport receptor (PubMed:11823430). Serves as receptor for nuclear localization signals (NLS) in cargo substrates (PubMed:11823430). Is thought to mediate docking of the importin/substrate complex to the nuclear pore complex (NPC) through binding to nucleoporin and the complex is subsequently translocated through the pore by an energy requiring, Ra…	0.797771
102597	-0.0260198	4.98703	g14832	Sc4wPfr_910	192035	192606	sp|B0UYT5|MFD6B_DANRE		0.94195
102598	-0.136189	4.38083	g14832	Sc4wPfr_910	192921	193229	sp|B0UYT5|MFD6B_DANRE		0.663468
102599	0.00611591	4.05833	g14832	Sc4wPfr_910	193791	194146	sp|B0UYT5|MFD6B_DANRE		0.99
102600	0.0296647	4.0269	g14832	Sc4wPfr_910	195441	195901	sp|B0UYT5|MFD6B_DANRE		0.943812
102602	-0.042177	2.91567	g14836	Sc4wPfr_910	208044	209201			0.951853
102606	-0.243569	4.27128	g14837	Sc4wPfr_910	233676	235880	sp|A1DWM3|MFSD6_PIG		0.660116
102610	-0.0321434	6.07209	g14837	Sc4wPfr_910	250192	252052	sp|A1DWM3|MFSD6_PIG		0.894861
102612	-0.111662	3.45553	g14838	Sc4wPfr_910	272722	273088	sp|Q8CBH5|MFSD6_MOUSE	MHC class I receptor. Binds only to H-2 class I histocompatibility antigen, K-D alpha chain (H-2K(D)).	0.734996
102615	-0.00420812	6.12901	g14838	Sc4wPfr_910	276548	277549	sp|Q8CBH5|MFSD6_MOUSE	MHC class I receptor. Binds only to H-2 class I histocompatibility antigen, K-D alpha chain (H-2K(D)).	0.988975
102616	0.117652	4.38835	g14838	Sc4wPfr_910	279529	279874	sp|Q8CBH5|MFSD6_MOUSE	MHC class I receptor. Binds only to H-2 class I histocompatibility antigen, K-D alpha chain (H-2K(D)).	0.699483
102622	0.293308	5.14519	g14839	Sc4wPfr_910	316311	318370	sp|B0UYT5|MFD6B_DANRE		0.00140825
102624	-0.101909	3.50522	g14839	Sc4wPfr_910	321752	322313	sp|B0UYT5|MFD6B_DANRE		0.780352
102625	0.133379	3.79553	g14839	Sc4wPfr_910	324690	325374	sp|B0UYT5|MFD6B_DANRE		0.639935
102627	0.0697053	4.49867	g14840	Sc4wPfr_910	329074	329831			0.825001
102634	0.224148	3.57925	g9166	Sc4wPfr_910.1	13905	15956	sp|Q8UWA5|CAH2_TRIHK	Reversible hydration of carbon dioxide.	0.449299
102636	-0.0362991	3.76079	g9166	Sc4wPfr_910.1	23498	24669	sp|Q8UWA5|CAH2_TRIHK	Reversible hydration of carbon dioxide.	0.939128
102637	-0.266345	4.47503	g9166	Sc4wPfr_910.1	38165	38709	sp|Q8UWA5|CAH2_TRIHK	Reversible hydration of carbon dioxide.	0.188371
102638	0.0680591	6.25537	g9166	Sc4wPfr_910.1	42065	43033	sp|Q8UWA5|CAH2_TRIHK	Reversible hydration of carbon dioxide.	0.767137
102640	-0.38972	3.22809	g9166	Sc4wPfr_910.1	46619	46822	sp|Q8UWA5|CAH2_TRIHK	Reversible hydration of carbon dioxide.	0.0704286
102641	0.0666567	5.3895	g9166	Sc4wPfr_910.1	48107	48714	sp|Q8UWA5|CAH2_TRIHK	Reversible hydration of carbon dioxide.	0.832433
102643	0.198323	3.71004	g9166	Sc4wPfr_910.1	60603	61372	sp|Q8UWA5|CAH2_TRIHK	Reversible hydration of carbon dioxide.	0.442591
102644	0.042342	3.42636	g9166	Sc4wPfr_910.1	66439	67532	sp|Q8UWA5|CAH2_TRIHK	Reversible hydration of carbon dioxide.	0.939531
102645	0.372436	4.3018	g9167	Sc4wPfr_910.1	71185	72668	sp|Q8UWA5|CAH2_TRIHK	Reversible hydration of carbon dioxide.	0.0488379
10265	0.112517	6.44532	g29748	Sc4wPfr_1214	980385	981872	sp|A9LIW2|CSC1L_BRAJU	Acts as an osmosensitive calcium-permeable cation channel.	0.376705
102652	0.142548	3.97856	g9167	Sc4wPfr_910.1	94780	95451	sp|Q8UWA5|CAH2_TRIHK	Reversible hydration of carbon dioxide.	0.550624
102653	-0.0935601	4.84006	g9167	Sc4wPfr_910.1	95713	96843	sp|Q8UWA5|CAH2_TRIHK	Reversible hydration of carbon dioxide.	0.703158
10266	0.00225435	5.24118	g29749	Sc4wPfr_1214	991209	992971	sp|Q24207|BOULE_DROME	RNA-binding protein that plays a central role in spermatogenesis. Required for meiotic entry and germline differentiation, at the transition between G2 and M phases of meiosis I. Acts by regulating translation of specific mRNAs, possibly by binding to their 3'-UTR. Essential for translation of twine (twe) mRNA. Required for the expression of various genes such as CG6784, CG17210, CG15841 scpr-B, …	0.994773
102661	-0.136136	5.51494	g9168	Sc4wPfr_910.1	127754	129116	sp|P35072|TCB1_CAEBR	Probably essential for transposable element Tcb1 transposition. The insertion of Tcb1 is the main cause of spontaneous mutations.	0.509716
102662	0.0286137	4.34821	g9168	Sc4wPfr_910.1	134592	135290	sp|P35072|TCB1_CAEBR	Probably essential for transposable element Tcb1 transposition. The insertion of Tcb1 is the main cause of spontaneous mutations.	0.94195
102665	0.00914328	3.87524	g9168	Sc4wPfr_910.1	139093	139708	sp|P35072|TCB1_CAEBR	Probably essential for transposable element Tcb1 transposition. The insertion of Tcb1 is the main cause of spontaneous mutations.	0.988673
102666	0.0872824	3.40433	g9168	Sc4wPfr_910.1	143777	144162	sp|P35072|TCB1_CAEBR	Probably essential for transposable element Tcb1 transposition. The insertion of Tcb1 is the main cause of spontaneous mutations.	0.858899
102667	0.517381	2.83186	g9169	Sc4wPfr_910.1	147566	148280	sp|Q8UWA5|CAH2_TRIHK	Reversible hydration of carbon dioxide.	0.0231259
102669	-0.0303971	6.00649	g9169	Sc4wPfr_910.1	154639	156246	sp|Q8UWA5|CAH2_TRIHK	Reversible hydration of carbon dioxide.	0.952178
10267	-0.413806	3.41116	g29749	Sc4wPfr_1214	998803	1000472	sp|Q24207|BOULE_DROME	RNA-binding protein that plays a central role in spermatogenesis. Required for meiotic entry and germline differentiation, at the transition between G2 and M phases of meiosis I. Acts by regulating translation of specific mRNAs, possibly by binding to their 3'-UTR. Essential for translation of twine (twe) mRNA. Required for the expression of various genes such as CG6784, CG17210, CG15841 scpr-B, …	0.0772056
102670	0.138951	4.6989	g9169	Sc4wPfr_910.1	157718	158396	sp|Q8UWA5|CAH2_TRIHK	Reversible hydration of carbon dioxide.	0.739601
102674	-0.00242389	5.38961	g9169	Sc4wPfr_910.1	174431	175067	sp|Q8UWA5|CAH2_TRIHK	Reversible hydration of carbon dioxide.	0.994773
102675	-0.0570681	5.45998	g9170	Sc4wPfr_910.1	180352	183270	sp|Q99808|S29A1_HUMAN	Mediates both influx and efflux of nucleosides across the membrane (equilibrative transporter). It is sensitive (ES) to low concentrations of the inhibitor nitrobenzylmercaptopurine riboside (NBMPR) and is sodium-independent. It has a higher affinity for adenosine. Inhibited by dipyridamole and dilazep (anticancer chemotherapeutics drugs).	0.825858
102678	-0.0577143	4.27463	g9170	Sc4wPfr_910.1	195664	196427	sp|Q99808|S29A1_HUMAN	Mediates both influx and efflux of nucleosides across the membrane (equilibrative transporter). It is sensitive (ES) to low concentrations of the inhibitor nitrobenzylmercaptopurine riboside (NBMPR) and is sodium-independent. It has a higher affinity for adenosine. Inhibited by dipyridamole and dilazep (anticancer chemotherapeutics drugs).	0.837308
102679	-0.00602094	4.15482	g9170	Sc4wPfr_910.1	197840	198426	sp|Q99808|S29A1_HUMAN	Mediates both influx and efflux of nucleosides across the membrane (equilibrative transporter). It is sensitive (ES) to low concentrations of the inhibitor nitrobenzylmercaptopurine riboside (NBMPR) and is sodium-independent. It has a higher affinity for adenosine. Inhibited by dipyridamole and dilazep (anticancer chemotherapeutics drugs).	0.991505
102680	-0.31965	3.70246	g9170	Sc4wPfr_910.1	201865	202395	sp|Q99808|S29A1_HUMAN	Mediates both influx and efflux of nucleosides across the membrane (equilibrative transporter). It is sensitive (ES) to low concentrations of the inhibitor nitrobenzylmercaptopurine riboside (NBMPR) and is sodium-independent. It has a higher affinity for adenosine. Inhibited by dipyridamole and dilazep (anticancer chemotherapeutics drugs).	0.147017
102683	0.0744962	4.78974	g9170	Sc4wPfr_910.1	237490	238098	sp|Q99808|S29A1_HUMAN	Mediates both influx and efflux of nucleosides across the membrane (equilibrative transporter). It is sensitive (ES) to low concentrations of the inhibitor nitrobenzylmercaptopurine riboside (NBMPR) and is sodium-independent. It has a higher affinity for adenosine. Inhibited by dipyridamole and dilazep (anticancer chemotherapeutics drugs).	0.76918
102686	-0.00287966	5.06774	g9173	Sc4wPfr_910.1	254715	255583	sp|Q6NUP7|PP4R4_HUMAN	Putative regulatory subunit of serine/threonine-protein phosphatase 4.	0.994465
102689	-0.12792	3.43807	g9175	Sc4wPfr_910.1	266061	267316			0.689688
10269	-0.271671	3.57388	g29749	Sc4wPfr_1214	1005093	1006096	sp|Q24207|BOULE_DROME	RNA-binding protein that plays a central role in spermatogenesis. Required for meiotic entry and germline differentiation, at the transition between G2 and M phases of meiosis I. Acts by regulating translation of specific mRNAs, possibly by binding to their 3'-UTR. Essential for translation of twine (twe) mRNA. Required for the expression of various genes such as CG6784, CG17210, CG15841 scpr-B, …	0.222763
102694	-0.150869	4.72192	g9179	Sc4wPfr_910.1	342883	344956	sp|Q5XI68|NC2B_RAT	The association of the DR1/DRAP1 heterodimer with TBP results in a functional repression of both activated and basal transcription of class II genes. This interaction precludes the formation of a transcription-competent complex by inhibiting the association of TFIIA and/or TFIIB with TBP. Can bind to DNA on its own. Component of the ATAC complex, a complex with histone acetyltransferase activity …	0.39128
102695	-0.00609468	5.09857	g9179	Sc4wPfr_910.1	355751	356735	sp|Q5XI68|NC2B_RAT	The association of the DR1/DRAP1 heterodimer with TBP results in a functional repression of both activated and basal transcription of class II genes. This interaction precludes the formation of a transcription-competent complex by inhibiting the association of TFIIA and/or TFIIB with TBP. Can bind to DNA on its own. Component of the ATAC complex, a complex with histone acetyltransferase activity …	0.987364
102696	0.0115194	4.36244	g9180	Sc4wPfr_910.1	361719	362147			0.98222
102697	-0.0511223	4.85008	g9180	Sc4wPfr_910.1	362448	363690			0.861077
102698	0.0660039	4.16151	g9180	Sc4wPfr_910.1	365434	366152			0.860157
102699	0.14838	4.36318	g9180	Sc4wPfr_910.1	366716	367022			0.547881
102702	-0.148743	4.47398	g9183	Sc4wPfr_910.1	375856	376789			0.402547
102705	-0.208357	3.47161	g9183	Sc4wPfr_910.1	396837	398303			0.521972
10271	-0.0516207	3.52238	g29749	Sc4wPfr_1214	1013489	1014456	sp|Q24207|BOULE_DROME	RNA-binding protein that plays a central role in spermatogenesis. Required for meiotic entry and germline differentiation, at the transition between G2 and M phases of meiosis I. Acts by regulating translation of specific mRNAs, possibly by binding to their 3'-UTR. Essential for translation of twine (twe) mRNA. Required for the expression of various genes such as CG6784, CG17210, CG15841 scpr-B, …	0.929857
102710	-0.296441	3.3126	g9183	Sc4wPfr_910.1	420674	422068			0.295726
102711	0.312923	5.03272	g9184	Sc4wPfr_910.1	428614	429920	sp|P81900|KAPR2_DROME	Regulatory subunit of the cAMP-dependent protein kinases involved in cAMP signaling in cells (PubMed:10781603, PubMed:9196067). Mediates membrane association by binding to anchoring proteins, such as Akap200 (PubMed:9196067, PubMed:12223401). Might play an essential role in the regulation of neuronal activity in the brain (PubMed:10781603, PubMed:9196067).	0.017554
102715	0.00522893	5.13247	g9184	Sc4wPfr_910.1	449274	450343	sp|P81900|KAPR2_DROME	Regulatory subunit of the cAMP-dependent protein kinases involved in cAMP signaling in cells (PubMed:10781603, PubMed:9196067). Mediates membrane association by binding to anchoring proteins, such as Akap200 (PubMed:9196067, PubMed:12223401). Might play an essential role in the regulation of neuronal activity in the brain (PubMed:10781603, PubMed:9196067).	0.992178
102716	-0.0289246	5.47038	g9184	Sc4wPfr_910.1	454799	455931	sp|P81900|KAPR2_DROME	Regulatory subunit of the cAMP-dependent protein kinases involved in cAMP signaling in cells (PubMed:10781603, PubMed:9196067). Mediates membrane association by binding to anchoring proteins, such as Akap200 (PubMed:9196067, PubMed:12223401). Might play an essential role in the regulation of neuronal activity in the brain (PubMed:10781603, PubMed:9196067).	0.94095
102717	0.176228	5.10185	g9184	Sc4wPfr_910.1	457504	458447	sp|P81900|KAPR2_DROME	Regulatory subunit of the cAMP-dependent protein kinases involved in cAMP signaling in cells (PubMed:10781603, PubMed:9196067). Mediates membrane association by binding to anchoring proteins, such as Akap200 (PubMed:9196067, PubMed:12223401). Might play an essential role in the regulation of neuronal activity in the brain (PubMed:10781603, PubMed:9196067).	0.227766
102729	-0.0733624	7.50938	g9187	Sc4wPfr_910.1	509541	510807	sp|P0CG48|UBC_HUMAN	Ubiquitin: Exists either covalently attached to another protein, or free (unanchored). When covalently bound, it is conjugated to target proteins via an isopeptide bond either as a monomer (monoubiquitin), a polymer linked via different Lys residues of the ubiquitin (polyubiquitin chains) or a linear polymer linked via the initiator Met of the ubiquitin (linear polyubiquitin chains). Polyubiquiti…	0.827485
102730	-0.00223692	7.59629	g9187	Sc4wPfr_910.1	512020	512953	sp|P0CG48|UBC_HUMAN	Ubiquitin: Exists either covalently attached to another protein, or free (unanchored). When covalently bound, it is conjugated to target proteins via an isopeptide bond either as a monomer (monoubiquitin), a polymer linked via different Lys residues of the ubiquitin (polyubiquitin chains) or a linear polymer linked via the initiator Met of the ubiquitin (linear polyubiquitin chains). Polyubiquiti…	0.994593
102731	0.125482	5.83669	g9187	Sc4wPfr_910.1	515957	516856	sp|P0CG48|UBC_HUMAN	Ubiquitin: Exists either covalently attached to another protein, or free (unanchored). When covalently bound, it is conjugated to target proteins via an isopeptide bond either as a monomer (monoubiquitin), a polymer linked via different Lys residues of the ubiquitin (polyubiquitin chains) or a linear polymer linked via the initiator Met of the ubiquitin (linear polyubiquitin chains). Polyubiquiti…	0.623972
102732	0.141629	5.722	g9187	Sc4wPfr_910.1	524971	526868	sp|P0CG48|UBC_HUMAN	Ubiquitin: Exists either covalently attached to another protein, or free (unanchored). When covalently bound, it is conjugated to target proteins via an isopeptide bond either as a monomer (monoubiquitin), a polymer linked via different Lys residues of the ubiquitin (polyubiquitin chains) or a linear polymer linked via the initiator Met of the ubiquitin (linear polyubiquitin chains). Polyubiquiti…	0.424655
102737	-0.0561275	3.74771	g9194	Sc4wPfr_910.1	582831	583621			0.897574
102738	-0.0751795	4.39498	g9199	Sc4wPfr_910.1	611588	612115			0.827485
102739	0.0883657	6.57336	g9199	Sc4wPfr_910.1	615549	616557			0.572811
10274	0.193132	6.71183	g29750	Sc4wPfr_1214	1023564	1025416	sp|Q98SN7|WNT2B_CHICK	Ligand for members of the frizzled family of seven transmembrane receptors (PubMed:12490564). Functions in the canonical Wnt/beta-catenin signaling pathway (PubMed:12490564). Acts as an upstream regulator of FGF10 in the lateral plate mesoderm during limb initiation in the embryo (PubMed:11290326).	0.138549
102743	0.0672784	4.37975	g9200	Sc4wPfr_910.1	626813	628237	sp|P60881|SNP25_RAT	t-SNARE involved in the molecular regulation of neurotransmitter release (PubMed:8243676, PubMed:8103915). Modulates the gating characteristics of the delayed rectifier voltage-dependent potassium channel KCNB1 in pancreatic beta cells (PubMed:12403834). May play an important role in the synaptic function of specific neuronal systems. Associates with proteins involved in vesicle docking and membr…	0.849308
102744	-0.0633112	4.86504	g9202	Sc4wPfr_910.1	672533	673219	sp|P60881|SNP25_RAT	t-SNARE involved in the molecular regulation of neurotransmitter release (PubMed:8243676, PubMed:8103915). Modulates the gating characteristics of the delayed rectifier voltage-dependent potassium channel KCNB1 in pancreatic beta cells (PubMed:12403834). May play an important role in the synaptic function of specific neuronal systems. Associates with proteins involved in vesicle docking and membr…	0.823405
102754	-0.00721819	5.15836	g9204	Sc4wPfr_910.1	750533	751404	sp|B3TP03|CTR2_CHICK	Low-affinity, high capacity permease involved in the transport of the cationic amino acids (arginine, lysine and ornithine).	0.983467
102758	-0.127646	3.33311	g9205	Sc4wPfr_910.1	780634	781429			0.703134
102760	-0.151729	3.86565	g9205	Sc4wPfr_910.1	784368	785198			0.754182
102764	-0.223871	3.96035	g9206	Sc4wPfr_910.1	818993	820106	sp|Q6AY20|MPRD_RAT	Transport of phosphorylated lysosomal enzymes from the Golgi complex and the cell surface to lysosomes. Lysosomal enzymes bearing phosphomannosyl residues bind specifically to mannose-6-phosphate receptors in the Golgi apparatus and the resulting receptor-ligand complex is transported to an acidic prelyosomal compartment where the low pH mediates the dissociation of the complex (By similarity).	0.356053
102766	0.114993	3.32493	g9206	Sc4wPfr_910.1	872462	873051	sp|Q6AY20|MPRD_RAT	Transport of phosphorylated lysosomal enzymes from the Golgi complex and the cell surface to lysosomes. Lysosomal enzymes bearing phosphomannosyl residues bind specifically to mannose-6-phosphate receptors in the Golgi apparatus and the resulting receptor-ligand complex is transported to an acidic prelyosomal compartment where the low pH mediates the dissociation of the complex (By similarity).	0.770453
102767	0.298376	4.15967	g9206	Sc4wPfr_910.1	878486	879427	sp|Q6AY20|MPRD_RAT	Transport of phosphorylated lysosomal enzymes from the Golgi complex and the cell surface to lysosomes. Lysosomal enzymes bearing phosphomannosyl residues bind specifically to mannose-6-phosphate receptors in the Golgi apparatus and the resulting receptor-ligand complex is transported to an acidic prelyosomal compartment where the low pH mediates the dissociation of the complex (By similarity).	0.22283
102769	0.128219	3.77853	g9206	Sc4wPfr_910.1	891432	891976	sp|Q6AY20|MPRD_RAT	Transport of phosphorylated lysosomal enzymes from the Golgi complex and the cell surface to lysosomes. Lysosomal enzymes bearing phosphomannosyl residues bind specifically to mannose-6-phosphate receptors in the Golgi apparatus and the resulting receptor-ligand complex is transported to an acidic prelyosomal compartment where the low pH mediates the dissociation of the complex (By similarity).	0.620431
102771	-0.0342676	5.41582	g9207	Sc4wPfr_910.1	912500	913790			0.889981
102773	0.0666323	3.61777	g9207	Sc4wPfr_910.1	915763	916511			0.866508
102775	0.101639	3.60288	g9207	Sc4wPfr_910.1	923214	925119			0.816645
102776	0.152321	5.30295	g9207	Sc4wPfr_910.1	931934	932689			0.603055
10278	-0.0239959	3.4937	g29751	Sc4wPfr_1214	1046709	1047397	sp|Q5FVB0|ATX10_XENTR	Necessary for the survival of cerebellar neurons. Induces neuritogenesis by activating the Ras-MAP kinase pathway. May play a role in the maintenance of a critical intracellular glycosylation level and homeostasis.	0.964101
102780	0.0654906	5.20156	g9208	Sc4wPfr_910.1	952652	953844			0.854796
102781	-0.551394	4.81843	g9208	Sc4wPfr_910.1	954296	954897			0.000883556
102782	-0.190328	5.0135	g9208	Sc4wPfr_910.1	959448	960603			0.307451
102783	-0.159047	4.6652	g9208	Sc4wPfr_910.1	961523	962356			0.578232
102785	-0.0020327	5.33287	g9208	Sc4wPfr_910.1	972715	973561			0.994881
102788	0.162232	5.4625	g9209	Sc4wPfr_910.1	984330	985259	sp|P49916|DNLI3_HUMAN	Isoform 3 functions as heterodimer with DNA-repair protein XRCC1 in the nucleus and can correct defective DNA strand-break repair and sister chromatid exchange following treatment with ionizing radiation and alkylating agents. Isoform 1 is targeted to mitochondria, where it functions as DNA ligase in mitochondrial base-excision DNA repair (PubMed:10207110, PubMed:24674627).	0.29433
102791	-1.18478	3.95153	g9209	Sc4wPfr_910.1	998852	1000098	sp|P49916|DNLI3_HUMAN	Isoform 3 functions as heterodimer with DNA-repair protein XRCC1 in the nucleus and can correct defective DNA strand-break repair and sister chromatid exchange following treatment with ionizing radiation and alkylating agents. Isoform 1 is targeted to mitochondria, where it functions as DNA ligase in mitochondrial base-excision DNA repair (PubMed:10207110, PubMed:24674627).	2.49555e-11
102796	-0.265932	4.79649	g9215	Sc4wPfr_910.1	1028802	1029759	sp|P49916|DNLI3_HUMAN	Isoform 3 functions as heterodimer with DNA-repair protein XRCC1 in the nucleus and can correct defective DNA strand-break repair and sister chromatid exchange following treatment with ionizing radiation and alkylating agents. Isoform 1 is targeted to mitochondria, where it functions as DNA ligase in mitochondrial base-excision DNA repair (PubMed:10207110, PubMed:24674627).	0.629018
102797	-0.253048	3.1526	g9215	Sc4wPfr_910.1	1030726	1031186	sp|P49916|DNLI3_HUMAN	Isoform 3 functions as heterodimer with DNA-repair protein XRCC1 in the nucleus and can correct defective DNA strand-break repair and sister chromatid exchange following treatment with ionizing radiation and alkylating agents. Isoform 1 is targeted to mitochondria, where it functions as DNA ligase in mitochondrial base-excision DNA repair (PubMed:10207110, PubMed:24674627).	0.630204
102798	-0.276877	3.24809	g9215	Sc4wPfr_910.1	1033927	1034338	sp|P49916|DNLI3_HUMAN	Isoform 3 functions as heterodimer with DNA-repair protein XRCC1 in the nucleus and can correct defective DNA strand-break repair and sister chromatid exchange following treatment with ionizing radiation and alkylating agents. Isoform 1 is targeted to mitochondria, where it functions as DNA ligase in mitochondrial base-excision DNA repair (PubMed:10207110, PubMed:24674627).	0.488466
102799	-0.196559	4.25811	g9215	Sc4wPfr_910.1	1034583	1035654	sp|P49916|DNLI3_HUMAN	Isoform 3 functions as heterodimer with DNA-repair protein XRCC1 in the nucleus and can correct defective DNA strand-break repair and sister chromatid exchange following treatment with ionizing radiation and alkylating agents. Isoform 1 is targeted to mitochondria, where it functions as DNA ligase in mitochondrial base-excision DNA repair (PubMed:10207110, PubMed:24674627).	0.642305
102800	-0.26437	4.70643	g9215	Sc4wPfr_910.1	1040558	1041159	sp|P49916|DNLI3_HUMAN	Isoform 3 functions as heterodimer with DNA-repair protein XRCC1 in the nucleus and can correct defective DNA strand-break repair and sister chromatid exchange following treatment with ionizing radiation and alkylating agents. Isoform 1 is targeted to mitochondria, where it functions as DNA ligase in mitochondrial base-excision DNA repair (PubMed:10207110, PubMed:24674627).	0.537218
102803	0.00410517	6.1733	g9215	Sc4wPfr_910.1	1065454	1066737	sp|P49916|DNLI3_HUMAN	Isoform 3 functions as heterodimer with DNA-repair protein XRCC1 in the nucleus and can correct defective DNA strand-break repair and sister chromatid exchange following treatment with ionizing radiation and alkylating agents. Isoform 1 is targeted to mitochondria, where it functions as DNA ligase in mitochondrial base-excision DNA repair (PubMed:10207110, PubMed:24674627).	0.990447
102809	-0.0116728	6.5763	g9216	Sc4wPfr_910.1	1102015	1102721			0.972266
102811	-0.178917	5.31775	g9219	Sc4wPfr_910.1	1110074	1112396			0.334333
102814	-0.042968	4.53755	g9220	Sc4wPfr_910.1	1121193	1123918	sp|A7ETB3|MDV1_SCLS1	Involved in mitochondrial fission. Acts as an adapter protein required to form mitochondrial fission complexes. Formation of these complexes is required to promote constriction and fission of the mitochondrial compartment at a late step in mitochondrial division (By similarity).	0.924403
102815	0.182503	5.53583	g9220	Sc4wPfr_910.1	1127366	1128703	sp|A7ETB3|MDV1_SCLS1	Involved in mitochondrial fission. Acts as an adapter protein required to form mitochondrial fission complexes. Formation of these complexes is required to promote constriction and fission of the mitochondrial compartment at a late step in mitochondrial division (By similarity).	0.313931
102819	0.0693926	5.073	g9222	Sc4wPfr_910.1	1185664	1186206	sp|Q922K7|NOP2_MOUSE	Involved in ribosomal large subunit assembly. S-adenosyl-L-methionine-dependent methyltransferase that specifically methylates the C(5) position of cytosine 4447 in 28S rRNA. May play a role in the regulation of the cell cycle and the increased nucleolar activity that is associated with the cell proliferation.	0.816588
102821	0.388414	3.89699	g9222	Sc4wPfr_910.1	1188943	1189895	sp|Q922K7|NOP2_MOUSE	Involved in ribosomal large subunit assembly. S-adenosyl-L-methionine-dependent methyltransferase that specifically methylates the C(5) position of cytosine 4447 in 28S rRNA. May play a role in the regulation of the cell cycle and the increased nucleolar activity that is associated with the cell proliferation.	0.0127236
102829	0.0519525	5.873	g9226	Sc4wPfr_910.1	1277446	1278509	sp|P0CB49|YLPM1_RAT	Plays a role in the reduction of telomerase activity during differentiation of embryonic stem cells by binding to the core promoter of TERT and controlling its down-regulation.	0.809792
10283	-0.105266	5.11602	g29759	Sc4wPfr_1214	1108232	1109441	sp|Q9NX08|COMD8_HUMAN	May modulate activity of cullin-RING E3 ubiquitin ligase (CRL) complexes (PubMed:21778237). May down-regulate activation of NF-kappa-B (PubMed:15799966).	0.607399
102830	-0.0913077	5.12907	g9226	Sc4wPfr_910.1	1286500	1287757	sp|P0CB49|YLPM1_RAT	Plays a role in the reduction of telomerase activity during differentiation of embryonic stem cells by binding to the core promoter of TERT and controlling its down-regulation.	0.658442
102831	-0.09667	5.20224	g9227	Sc4wPfr_910.1	1290561	1291530	sp|Q6GME2|CK054_XENLA	Exhibits ester hydrolase activity on the substrate p-nitrophenyl acetate.	0.613005
102833	-0.139939	5.3362	g9227	Sc4wPfr_910.1	1302865	1303770	sp|Q6GME2|CK054_XENLA	Exhibits ester hydrolase activity on the substrate p-nitrophenyl acetate.	0.382917
102837	-0.0263318	4.05665	g9231	Sc4wPfr_910.1	1373213	1374215	sp|Q9CR88|RT14_MOUSE		0.953118
102840	-0.410477	3.47255	g9232	Sc4wPfr_910.1	1394479	1397500	sp|Q7L2J0|MEPCE_HUMAN	S-adenosyl-L-methionine-dependent methyltransferase that adds a methylphosphate cap at the 5'-end of 7SK snRNA, leading to stabilize it.	0.121839
102841	0.116388	4.7497	g9232	Sc4wPfr_910.1	1403402	1404540	sp|Q7L2J0|MEPCE_HUMAN	S-adenosyl-L-methionine-dependent methyltransferase that adds a methylphosphate cap at the 5'-end of 7SK snRNA, leading to stabilize it.	0.6575
102842	-0.130581	4.65429	g9233	Sc4wPfr_910.1	1417459	1419857	sp|Q5R231|ACTP1_ACTVL	Pore-forming protein that forms cations-selective hydrophilic pores of around 1 nm and causes hemolysis. Pore formation is a multi-step process that involves specific recognition of membrane sphingomyelin (but neither cholesterol nor phosphatidylcholine) using aromatic rich region and adjacent phosphocholine (POC) binding site, firm binding to the membrane (mainly driven by hydrophobic interactio…	0.600755
102843	0.343469	6.30462	g21939	Sc4wPfr_911	29948	30798			0.0110955
102846	0.0296246	4.19846	g21944	Sc4wPfr_911	80016	81804			0.931319
10285	-0.0318022	5.85306	g29760	Sc4wPfr_1214	1113399	1114909	sp|Q5ZM11|SYRC_CHICK	Forms part of a macromolecular complex that catalyzes the attachment of specific amino acids to cognate tRNAs during protein synthesis.	0.883457
102860	-0.23187	2.54992	g21950	Sc4wPfr_911	183297	184019			0.968768
10287	0.295124	3.75602	g29760	Sc4wPfr_1214	1151716	1153587	sp|Q5ZM11|SYRC_CHICK	Forms part of a macromolecular complex that catalyzes the attachment of specific amino acids to cognate tRNAs during protein synthesis.	0.135758
102870	0.0197324	5.25618	g9890	Sc4wPfr_913	1274	3692			0.956389
102871	0.171175	3.96982	g9892	Sc4wPfr_913	36644	37756			0.438096
102872	-0.096456	4.7654	g9892	Sc4wPfr_913	44025	45612			0.714755
102877	-0.244143	4.17124	g9893	Sc4wPfr_913	61609	62242	sp|Q2Q426|AGRE2_MACMU	Cell surface receptor that binds to the chondroitin sulfate moiety of glycosaminoglycan chains and promotes cell attachment. Promotes granulocyte chemotaxis, degranulation and adhesion. In macrophages, promotes the release of inflammatory cytokines, including IL8 and TNF. Signals probably through G-proteins.	0.213658
102878	-0.647155	4.67027	g9893	Sc4wPfr_913	62665	63868	sp|Q2Q426|AGRE2_MACMU	Cell surface receptor that binds to the chondroitin sulfate moiety of glycosaminoglycan chains and promotes cell attachment. Promotes granulocyte chemotaxis, degranulation and adhesion. In macrophages, promotes the release of inflammatory cytokines, including IL8 and TNF. Signals probably through G-proteins.	5.49879e-06
102879	-0.113379	3.96615	g9894	Sc4wPfr_913	153581	154548	sp|Q08AY6|KT5AA_XENLA	Protein-lysine N-methyltransferase that monomethylates both histones and non-histone proteins. Specifically monomethylates 'Lys-20' of histone H4 (H4K20me1). H4K20me1 is enriched during mitosis and represents a specific tag for epigenetic transcriptional repression. Mainly functions in euchromatin regions, thereby playing a central role in the silencing of euchromatic genes. Required for cell pro…	0.763726
10288	0.443507	3.71277	g29761	Sc4wPfr_1214	1164979	1166032	sp|P25927|BIGA_SALTY		0.0102492
102881	-0.0191818	5.54247	g9895	Sc4wPfr_913	163970	165279			0.945246
102886	0.131683	3.67521		Sc4wPfr_913.1	20071	21741			0.761161
10289	0.236826	3.49548	g29761	Sc4wPfr_1214	1168835	1169263	sp|P25927|BIGA_SALTY		0.281588
102891	0.192246	5.29954	g6896	Sc4wPfr_914	19682	20828			0.22132
102892	-0.0135225	3.77438	g6896	Sc4wPfr_914	28346	30158			0.975966
1029	0.131567	7.02752	g13520	Sc4wPfr_1010	424900	426187			0.23717
102911	-0.13077	5.75103	g6898	Sc4wPfr_914	207155	207782	sp|Q8JZM7|CDC73_MOUSE	Tumor suppressor probably involved in transcriptional and post-transcriptional control pathways. May be involved in cell cycle progression through the regulation of cyclin D1/PRAD1 expression. Component of the PAF1 complex (PAF1C) which has multiple functions during transcription by RNA polymerase II and is implicated in regulation of development and maintenance of embryonic stem cell pluripotenc…	0.281352
102913	-0.148565	4.40187	g6898	Sc4wPfr_914	213490	214912	sp|Q8JZM7|CDC73_MOUSE	Tumor suppressor probably involved in transcriptional and post-transcriptional control pathways. May be involved in cell cycle progression through the regulation of cyclin D1/PRAD1 expression. Component of the PAF1 complex (PAF1C) which has multiple functions during transcription by RNA polymerase II and is implicated in regulation of development and maintenance of embryonic stem cell pluripotenc…	0.536937
102916	-0.0145572	5.43957	g6899	Sc4wPfr_914	244488	247332	sp|Q8BI21|RNF38_MOUSE	Acts as an E3 ubiquitin-protein ligase able to ubiquitinate p53/TP53 which promotes its relocalization to discrete foci associated with PML nuclear bodies. Exhibits preference for UBE2D2 as a E2 enzyme.	0.962127
102918	0.0973241	3.61002	g6899	Sc4wPfr_914	259487	261331	sp|Q8BI21|RNF38_MOUSE	Acts as an E3 ubiquitin-protein ligase able to ubiquitinate p53/TP53 which promotes its relocalization to discrete foci associated with PML nuclear bodies. Exhibits preference for UBE2D2 as a E2 enzyme.	0.777352
10292	-0.0308145	4.32264	g29761	Sc4wPfr_1214	1180707	1181126	sp|P25927|BIGA_SALTY		0.934141
102921	-0.0797183	4.97574	g6900	Sc4wPfr_914	273211	274339	sp|Q53H47|SETMR_HUMAN	Protein derived from the fusion of a methylase with the transposase of an Hsmar1 transposon that plays a role in DNA double-strand break repair, stalled replication fork restart and DNA integration. DNA-binding protein, it is indirectly recruited to sites of DNA damage through protein-protein interactions. Has also kept a sequence-specific DNA-binding activity recognizing the 19-mer core of the 5…	0.810414
102922	-0.0412346	5.90372	g6899	Sc4wPfr_914	288477	289023	sp|Q8BI21|RNF38_MOUSE	Acts as an E3 ubiquitin-protein ligase able to ubiquitinate p53/TP53 which promotes its relocalization to discrete foci associated with PML nuclear bodies. Exhibits preference for UBE2D2 as a E2 enzyme.	0.871174
102925	-0.00651183	3.88488	g6904	Sc4wPfr_914	322007	322765	sp|O00555|CAC1A_HUMAN	Voltage-sensitive calcium channels (VSCC) mediate the entry of calcium ions into excitable cells and are also involved in a variety of calcium-dependent processes, including muscle contraction, hormone or neurotransmitter release, gene expression, cell motility, cell division and cell death. The isoform alpha-1A gives rise to P and/or Q-type calcium currents. P/Q-type calcium channels belong to t…	0.990643
10293	-0.105454	3.76648	g29761	Sc4wPfr_1214	1184296	1185343	sp|P25927|BIGA_SALTY		0.790733
102931	-0.0358973	5.21609	g6905	Sc4wPfr_914	366417	367880	sp|Q13698|CAC1S_HUMAN	Pore-forming, alpha-1S subunit of the voltage-gated calcium channel that gives rise to L-type calcium currents in skeletal muscle. Calcium channels containing the alpha-1S subunit play an important role in excitation-contraction coupling in skeletal muscle via their interaction with RYR1, which triggers Ca(2+) release from the sarcplasmic reticulum and ultimately results in muscle contraction. Lo…	0.931779
102942	0.132869	3.69455	g6910	Sc4wPfr_914	457969	459634	sp|Q94K49|ALP1_ARATH	Transposase-derived protein that may have nuclease activity (Probable). Antagonist of polycomb-group (PcG) protein-mediated chromatin silencing, probably by preventing the association of POLYCOMB REPRESSIVE COMPLEX 2 (PRC2) with its accessory components. Needed for full reactivation of several floral homeotic genes that are repressed by PcG (PubMed:26642436).	0.669357
102944	0.0519838	4.78904	g6919	Sc4wPfr_914	509619	511126			0.864467
102951	-0.0252084	3.24363	g31854	Sc4wPfr_917	21734	23114	sp|Q5IS99|CASP3_SAIBB	Involved in the activation cascade of caspases responsible for apoptosis execution. At the onset of apoptosis it proteolytically cleaves poly(ADP-ribose) polymerase (PARP) at a '216-Asp-|-Gly-217' bond. Cleaves and activates sterol regulatory element binding proteins (SREBPs) between the basic helix-loop-helix leucine zipper domain and the membrane attachment domain. Cleaves and activates caspase…	0.968772
102954	0.0244544	4.5135	g31855	Sc4wPfr_917	39074	39779			0.951853
[truncated: 34,343 more rows]

## Sheet: F12F0
Peak ID	log2FC	log2CPM	Nearest Gene ID	Peak Contig ID	Peak Start Coordinate	Peak End Coordinate	SwissProt Hit ID	SwissProt Hit Description	False Discovery Rate
[truncated: 35,397 more rows]

[truncated: 26 more sheets: F12F8, F3F0, F3H3, F8F0, F8F3, F8H8, Fi12Fi0, Fi3Fi0, Fi8Fi0, Fi8Fi3, H12H0, H12H8, H3H0, H8H0, H8H3, Hi12Hi0, Hi3Hi0, Hi8Hi0, Hi8Hi3, HRFR12c0 …]
