# Supplementary material for: Generic injuries are sufficient to induce ectopic Wnt organizers in Hydra
Source: eLife. 2021 Mar 29;10:e60562. doi: 10.7554/eLife.60562 (PMC8049744; doi:10.7554/eLife.60562)
Supplement: Supplementary file 2. — Excel workbook containing the results tables generated by edgeR as individual worksheets. The first sheet in the workbook (‘Contrasts’) provides the formulae associated with the names assigned to each comparison in the workbook. Genes were included in the analysis if they had at least two mapped counts per million in at least three samples. The first sheet in the worksheet (‘Contrasts’) provides the formulae/descriptions associated with the names given to each comparison in the workbook. [file elife-60562-supp2.xlsx]

## Sheet: Contrasts
Contrast Name	Contrast Formula/Description
Hi0vFi0	Hi0 - Fi0
Hi8vFi8	Hi8 - Fi8
Hi12vFi12	Hi12 - Fi12
Hi8vHi0	Hi8 - Hi0
Hi12vHi0	Hi12 - Hi0
Fi8vFi0	Fi8 - Fi0
Fi12vFi0	Fi12 - Fi0
Hi8vFi8c0	(Hi8 - Hi0) - (Fi8 - Fi0)
Hi12vFi12c0	(Hi12 - Hi0) - (Fi12 - Fi0)
Hi12vFi12c8	(Hi12 - Hi8) - (Fi12 - Fi8)
H12vHi12c0	(Hi12 - Hi0) - (H12 - H0)
F12vFi12c0	(Fi12 - Fi0) - (F12 - F0)
H8vHi8c0	(Hi8 - Hi0) - (H8 - H0)
F8vFi8c0	(Fi8 - Fi0) - (F8 - F0)
H0vF0	H0 - F0
H3vF3	H3 - F3
H8vF8	H8 - F8
H12vF12	H12 - F12
H3vH0	H3 - H0
H8vH0	H8 - H0
H12vH0	H12 - H0
F3vF0	F3 - F0
F8vF0	F8 - F0
F12vF0	F12 - F0
H8vH3	H8 - H3
F8vF3	F8 - F3
H12vH8	H12 - H8
F12vF8	F12 - F8
HR3vFR3	(H3 - H0) - (F3 - F0)
HR8vFR8c0	(H8 - H0) - (F8 - F0)
HR8vFR8c3	(H8 - H3) - (F8 - F3)
HR12vFR12c0	(H12 - H0) - (F12 - F0)
HR12vFR12c3	(H12 - H3) - (F12 - F3)
SC.8	Enrichment in single cell data when comparing epithelial foot clusters to epithelial head clusters. Transcripts that passed a significance threshold in H8vH0, F8vF0, or HR8vFR8c0 are included in analysis.
SC.12	Enrichment in single cell data when comparing epithelial foot clusters to epithelial head clusters. Transcripts that passed a significance threshold in H12vH0, F12vF0, or HR12vFR12c0 are included in analysis.

## Sheet: SC.8
ID	LogFC	Percent Positive, Head Cells	Percent Positive, Foot Cells	Adjusted P-value
g2198.t1|K1958-HUMAN	-1.74497	0.005	0.478	0
g16882.t1	-2.58187	0.011	0.446	1.61014e-293
g4917.t1|TLD-DROME	-0.942749	0.008	0.43	7.41553e-287
g9565.t1|DNMT1-PARLI	-2.17284	0.09	0.57	1.23911e-270
g1771.t1|TENA-DROME	-2.35285	0.003	0.367	3.9066e-250
g15630.t1|KCP4-PINMG	-1.59152	0.002	0.304	2.44605e-204
g18717.t1	-1.13374	0.005	0.282	6.34683e-180
g3710.t2|ANTA-HYDVU	-1.31505	0.053	0.372	2.12516e-157
g20995.t1|GST-NOTSL	2.58734	0.579	0.157	1.51775e-152
g32158.t1|LOX5-MESAU	-1.201	0.075	0.403	1.29625e-151
g29750.t1|WNT2B-CHICK	1.58866	0.442	0.008	9.57078e-145
g10680.t1|KCP4-PINMG	-1.43203	0.171	0.532	2.2425e-139
g23421.t1|IABF-STRAW	-0.686861	0.011	0.244	1.29382e-135
g3660.t1	-1.81888	0.349	0.664	1.81169e-135
g6131.t1|CP17A-ICTPU	-0.957656	0.117	0.448	1.58379e-134
g3709.t1	-2.60536	0.365	0.63	5.2167e-124
g6067.t1	-1.09993	0.052	0.322	8.26183e-123
g726.t1	-0.752349	0.002	0.184	5.28051e-116
g28449.t1|FD4-DROME	-0.540491	0.027	0.252	8.37244e-111
g5455.t1	-0.484995	0.024	0.238	1.00016e-106
g712.t1	-0.580101	0	0.158	7.46046e-103
g24036.t1	-1.02286	0.042	0.275	2.18469e-102
g13250.t1|AHV-ACTSK	-0.677375	0.138	0.428	3.59136e-97
g11696.t1|TPM1-HYDVU	1.60121	0.418	0.082	2.84511e-96
g24191.t1|FA5-BOVIN	0.875905	0.366	0.035	3.81296e-96
g22114.t1	-0.813302	0.671	0.862	4.27171e-91
g17928.t4	0.962787	0.426	0.107	2.10516e-87
g13929.t1|5NTC-PONAB	1.20238	0.641	0.402	1.30891e-84
g2038.t1|GRM7-RAT	0.71985	0.314	0.019	3.62838e-84
g22112.t1|B3GT6-MOUSE	-0.584832	0.085	0.323	5.773e-82
g28262.t1|WNT5A-HUMAN	0.869682	0.335	0.044	1.17275e-77
g33661.t1|CPEB1-PONAB	-0.730129	0.629	0.796	4.13837e-77
g28992.t1|EGL4-CAEEL	0.886705	0.423	0.128	1.2596e-75
g3847.t1|DMTA2-XENTR	0.64451	0.414	0.109	1.02183e-72
g18277.t1|GAPR1-HUMAN	2.01324	0.306	0.042	7.31479e-71
g12471.t1	0.827842	0.513	0.213	1.46203e-68
g30865.t1|PXDN-DROME	0.604226	0.371	0.087	1.84171e-68
g1279.t1	1.05754	0.384	0.11	1.06891e-66
g10944.t1|RHOC-CHICK	-0.514939	0.139	0.38	5.50549e-66
g27778.t1|LAMC-DROME	1.69776	0.278	0.03	7.60746e-65
g10986.t1	-0.625599	0.499	0.724	3.18537e-64
g710.t1|RTXE-DROME	-0.299609	0.001	0.104	6.31033e-63
g2700.t1|AT1A-HYDVU	0.849115	0.452	0.185	2.58281e-62
g18779.t1|NPY4R-MOUSE	-0.409123	0.016	0.148	2.63222e-61
g10787.t1|FLNC-RAT	0.737873	0.294	0.05	1.25139e-60
g30674.t1|CHAC1-RAT	-1.37111	0.231	0.457	1.34443e-60
g24241.t1|EMAL4-XENTR	1.20745	0.266	0.03	5.74811e-60
g16165.t1|ZIC4-MOUSE	0.42501	0.232	0.012	1.39203e-57
g11062.t1|GAPR1-HUMAN	0.95829	0.233	0.015	3.05525e-57
g20991.t1|GST-NOTSL	0.540461	0.242	0.021	1.0727e-56
g28064.t1|WNT3-MOUSE	0.793345	0.22	0.008	1.23862e-56
g15181.t1|PLPP3-BOVIN	-0.473698	0.072	0.255	2.43031e-56
g234.t1|CALM-SCHPO	1.44694	0.44	0.206	3.27031e-56
g4584.t1	0.679538	0.482	0.231	2.51306e-55
g24883.t1	-0.263683	0.005	0.105	1.49874e-54
g23588.t1|TRAF4-MOUSE	0.874835	0.211	0.007	3.66336e-54
g33271.t1	0.506914	0.46	0.195	1.57601e-50
g21219.t1|MYPT1-CHICK	-0.884419	0.147	0.345	2.45189e-49
g433.t1|SHAN1-RAT	-0.516435	0.174	0.391	3.62382e-48
g6282.t1	0.834813	0.397	0.17	3.24713e-47
g24114.t1|OTX2-XENTR	0.384602	0.268	0.054	1.98539e-46
g15603.t1|RDH11-MOUSE	0.507493	0.429	0.188	1.1024e-44
g24483.t1|DCC-MOUSE	0.806815	0.24	0.045	1.62691e-44
g30252.t1	0.697963	0.19	0.012	2.57016e-44
g27334.t1|GLNA-PANAR	1.20888	0.219	0.033	1.9281e-43
g18321.t1	-0.400191	0.392	0.64	1.50753e-41
g33396.t1|OTX5-XENTR	-0.243619	0.018	0.122	3.04442e-41
g4015.t1	0.466354	0.292	0.086	1.20871e-40
g8768.t1|HXA9B-TAKRU	0.443008	0.253	0.059	1.64835e-40
g4323.t1	-0.285549	0.032	0.151	3.59169e-40
g9994.t1|RS11-MAGSA	0.517638	0.265	0.069	3.84557e-40
g24147.t1	0.402892	0.251	0.059	1.95979e-39
g6418.t1|TGMH-TACTR	0.703274	0.215	0.039	8.69173e-39
g11718.t1	0.348396	0.23	0.048	3.83113e-38
g22879.t1|CAPSL-HUMAN	-0.792292	0.345	0.504	5.71605e-38
g14380.t1|NCF2-BOVIN	0.357508	0.191	0.026	8.14038e-37
g19568.t1	-0.346505	0.204	0.421	1.61883e-36
g33477.t1|MYPH-ECHGR	-0.41693	0.536	0.704	2.14292e-36
g2028.t1	0.365962	0.266	0.081	9.18612e-34
g33422.t1|SP4-MOUSE	0.51786	0.406	0.207	2.77611e-33
g10034.t1|CEL2A-PIG	-1.00295	0.234	0.386	3.34961e-33
g29454.t1|Y1101-SYNY3	0.29971	0.793	0.618	9.06067e-33
g27082.t1|RIMB2-MOUSE	0.52277	0.228	0.061	1.47426e-32
g79.t1|ZN436-HUMAN	0.569913	0.419	0.231	1.78207e-32
g26840.t1|ZN703-XENTR	0.338951	0.165	0.019	2.92987e-32
g30442.t1	0.492628	0.26	0.086	3.398e-32
g11697.t1|NAS4-CAEEL	-0.375287	0.27	0.463	8.8915e-32
g33749.t1|TEN1-CAEEL	-0.228911	0.008	0.078	1.54186e-30
g20918.t1|OPSL-LIMPO	-0.32408	0.029	0.127	1.72663e-30
g19253.t1|CALB2-RAT	0.559961	0.161	0.02	1.86794e-30
g258.t1|IF2-DESHY	0.397877	0.586	0.408	3.53969e-30
g31502.t1	-0.742029	0.403	0.53	1.8879e-29
g20911.t1|GATA2-XENLA	-0.192177	0.017	0.098	8.2098e-29
g5735.t1|RHG06-MOUSE	0.434394	0.235	0.074	1.94352e-28
g24952.t1|BRAC-HUMAN	0.524251	0.144	0.017	1.38184e-27
g29448.t1|MYPH-ECHGR	0.458197	0.753	0.57	1.81568e-27
g22933.t1|KCNQ5-HUMAN	0.290902	0.181	0.039	2.36214e-27
g6320.t1|AT1A-HYDVU	0.370392	0.4	0.221	4.38559e-27
g28117.t1|CO6A6-HUMAN	0.651277	0.18	0.043	1.09994e-26
g12274.t1|FRIZ2-CAEEL	-0.581055	0.088	0.215	1.39246e-26
g17917.t1|FCA1-TRYRA	0.564832	0.157	0.027	4.34585e-26
g23429.t1|RSGI5-CLOTH	-0.187915	0.003	0.056	5.10547e-26
g28617.t1|SYT9-HUMAN	0.314548	0.296	0.122	9.79297e-26
g22533.t1|TBA1C-HUMAN	0.480646	0.136	0.016	1.55645e-25
g20012.t1	0.215235	0.134	0.015	1.9237e-25
g28232.t1	-0.437927	0.463	0.634	2.16479e-25
g1276.t1|HMCN1-HUMAN	0.315736	0.145	0.022	3.5833e-25
g6167.t1|PCKGM-MOUSE	0.456808	0.202	0.06	4.26808e-25
g4003.t1|PTPR2-RAT	-0.597505	0.409	0.545	5.1685e-25
g14685.t1|SPY2-BOVIN	-0.8788	0.302	0.436	6.64358e-25
g26764.t1	0.244537	0.209	0.062	9.41806e-25
g32559.t1	0.295195	0.175	0.041	9.91115e-25
g9118.t1	-0.192343	0.021	0.1	2.67516e-24
g25556.t1|A30BL-HUMAN	0.162561	0.115	0.007	3.68345e-24
g30386.t1|VENT1-XENTR	0.184634	0.104	0.002	5.08876e-24
g32238.t1	-0.247008	0.08	0.203	8.79288e-24
g7738.t1	-1.11514	0.235	0.377	9.70213e-24
g12732.t1|CAR11-MOUSE	-0.311141	0.2	0.363	1.18225e-23
g33457.t1	-0.190689	0.015	0.084	2.05831e-23
g27138.t1|NCF2-BOVIN	0.227469	0.128	0.015	2.16546e-23
g30398.t1|CRYAB-BOVIN	0.340421	0.795	0.689	2.658e-23
g15773.t2	0.745809	0.258	0.114	8.44154e-23
g15387.t1|DMX1B-DANRE	-0.296353	0.065	0.173	1.27978e-22
g31005.t1	0.23384	0.115	0.011	5.06139e-22
g4061.t1|PRY1-YEAST	0.252064	0.105	0.006	8.9738e-22
g10485.t1	0.269183	0.312	0.151	2.05088e-21
g13247.t1|AHV-ACTSK	-0.191004	0.032	0.114	2.39415e-21
g10300.t1|B4GN4-HUMAN	0.200467	0.108	0.009	3.0567e-21
g14708.t1	-0.89279	0.184	0.322	5.15501e-21
g32552.t1|SPD2A-DANRE	0.307145	0.159	0.04	5.38342e-21
g4769.t1|ELOV5-XENTR	0.251393	0.201	0.068	1.50901e-20
g23859.t1|VILI-CHICK	0.222953	0.103	0.008	4.70321e-20
g33757.t1	0.247246	0.214	0.081	5.66656e-20
g9693.t1|CAS4-EPHMU	0.198834	0.096	0.005	9.9325e-20
g12884.t1|MANF-BOVIN	-0.256995	0.904	0.93	2.01873e-19
g24911.t1	-0.234645	0.064	0.164	2.0546e-19
g21066.t1	0.19055	0.091	0.004	2.56017e-19
g20686.t1	0.27376	0.248	0.106	4.24427e-19
g26620.t1|AVIL-HUMAN	0.253442	0.16	0.044	5.03081e-19
g17998.t1|CRYAB-BOVIN	0.229019	0.951	0.922	6.13938e-19
g33373.t1|WNT7B-HUMAN	0.965675	0.085	0.002	1.01549e-18
g15894.t1|DUT-RHILW	0.321289	0.246	0.11	1.44314e-18
g14229.t1|GREM2-HUMAN	0.169721	0.133	0.027	1.52813e-18
g13058.t1|SODC-CAMDR	0.563128	0.374	0.221	1.94864e-18
g7838.t1	0.24036	0.192	0.07	5.01862e-18
g4922.t1|MACF1-RAT	0.30886	0.463	0.307	2.09029e-17
g23416.t1|MCL1-FELCA	0.297477	0.596	0.449	3.24447e-17
g14938.t1|AXIN1-HUMAN	0.241047	0.209	0.084	3.66266e-17
g33728.t1|AMPD2-HUMAN	0.0469874	0.339	0.529	4.88738e-17
g33686.t1	0.166577	0.134	0.032	5.63475e-17
g29540.t1|GGT1-RAT	0.423353	0.518	0.36	6.36935e-17
g21174.t1|CAN3-PIG	0.133973	0.12	0.024	1.32557e-16
g5147.t1	0.194972	0.138	0.037	2.78272e-16
g11745.t1|MYPT1-CHICK	0.370634	0.502	0.365	8.16277e-16
g12875.t1	-0.22673	0.309	0.46	1.01477e-15
g31352.t1|RECK-MOUSE	-0.218926	0.192	0.329	1.22818e-15
g1275.t1|PROP-HUMAN	0.193333	0.115	0.025	1.46859e-15
g17348.t1|MOM5-CAEEL	-0.134648	0.037	0.11	5.9606e-15
g5995.t1|MKNK1-MOUSE	0.181992	0.13	0.035	6.4361e-15
g29473.t1|RHCG-CHICK	0.434894	0.19	0.079	7.66946e-15
g1973.t2|KI26A-MOUSE	0.330711	0.269	0.142	9.27334e-15
g29383.t1|OPSO-RUTRU	0.170201	0.107	0.021	1.09804e-14
g5411.t1	-0.38103	0.586	0.673	1.61546e-14
g29487.t1|ABR-BOVIN	0.28119	0.315	0.18	1.82025e-14
g19531.t1	1.70779	0.122	0.033	1.97861e-14
g29266.t1|ADCY9-MOUSE	-0.304537	0.141	0.244	3.75567e-14
g12567.t1|SOX2-CHICK	0.25858	0.091	0.013	3.83302e-14
g6403.t1	0.130636	0.07	0.003	4.83926e-14
g12120.t1|MMP7-RAT	-0.221823	0.049	0.126	6.22086e-14
g28786.t1|RB22A-MOUSE	0.27294	0.494	0.36	1.09793e-13
g4303.t1|ARHGG-HUMAN	0.25086	0.34	0.204	1.34217e-13
g19401.t1|NUCB2-RAT	-0.25595	0.78	0.822	2.31816e-13
g6256.t1	-0.195964	0.021	0.076	3.99495e-13
g2274.t1	-0.220448	0.038	0.105	4.98497e-13
g4715.t1	-0.337425	0.595	0.677	6.66842e-13
g26294.t1|PAR12-HUMAN	0.286906	0.391	0.257	7.91806e-13
g14855.t1	-0.0771563	0.007	0.045	9.07723e-13
g3893.t1|ASPGB-ARATH	-0.543172	0.201	0.304	1.41747e-12
g23270.t1|FSHR-CAIMO	0.149153	0.085	0.013	2.11873e-12
g2111.t2|PRIC1-DROPS	0.155548	0.105	0.026	3.03708e-12
g33251.t1|PRB1-ARATH	0.163491	0.111	0.029	3.07215e-12
g30406.t1	0.128093	0.103	0.024	3.42487e-12
g31719.t1	1.32692	0.139	0.052	3.5291e-12
g12223.t1|MYLIP-RAT	0.329125	0.412	0.295	5.89308e-12
g14048.t1|DAPK2-HUMAN	0.185443	0.31	0.175	7.41732e-12
g22934.t1	0.58917	0.271	0.161	7.72851e-12
g19012.t1|YQK1-SCHPO	-0.33529	0.31	0.424	7.7794e-12
g2189.t1	-0.133179	0.014	0.059	9.45864e-12
g10961.t1|GAPR1-MOUSE	-0.0624291	0.003	0.032	1.48745e-11
g5882.t1|SAL-SILAS	-0.562714	0.356	0.447	1.61598e-11
g20349.t1|Y2028-MYCBO	0.282949	0.609	0.492	1.99933e-11
g87.t1|GFPT2-RAT	0.602216	0.498	0.43	3.0743e-11
g16431.t1|ATS9-HUMAN	0.135398	0.072	0.009	3.73744e-11
g29309.t1|S35B2-HUMAN	0.203351	0.216	0.108	3.96611e-11
g4475.t1	0.503498	0.498	0.415	4.90907e-11
g13212.t1|TLL2-HUMAN	0.362513	0.246	0.14	5.22847e-11
g3553.t1|PHNX-SYNFM	0.769453	0.36	0.261	5.81179e-11
g7524.t1|CERS6-HUMAN	0.165766	0.216	0.109	8.34162e-11
g10536.t1|MITF-MOUSE	0.218315	0.366	0.24	8.35997e-11
g6940.t1|ERAP2-BOVIN	0.108112	0.06	0.004	8.70105e-11
g17979.t1|CRYAB-BOVIN	0.236349	0.704	0.604	1.11257e-10
g2830.t1|WHITE-DROME	0.215816	0.22	0.114	1.81605e-10
g30409.t1|CASR-RAT	-0.0831664	0.012	0.052	2.50618e-10
g28374.t1	0.239608	0.318	0.199	2.63717e-10
g28055.t1	-0.0441025	0.004	0.035	3.4774e-10
g25356.t1|FBN1-HUMAN	-0.192955	0.078	0.156	5.49846e-10
g2192.t1|LMX1A-HUMAN	-0.111371	0.029	0.083	1.1215e-09
g29837.t1	-0.365066	0.251	0.343	1.62494e-09
g28899.t1|COASY-HUMAN	0.202554	0.4	0.278	1.89947e-09
g14402.t1|S2536-DANRE	0.180721	0.123	0.045	2.2433e-09
g4679.t1|RIMK-SYNPX	0.159346	0.239	0.133	2.81219e-09
g17202.t1|TRAF5-MOUSE	0.302048	0.442	0.317	3.24921e-09
g25893.t1	0.239354	0.2	0.106	4.32904e-09
g31632.t1|HES1B-XENLA	0.258607	0.239	0.136	4.95784e-09
g18477.t1|FORF-DICDI	0.087979	0.075	0.015	5.42626e-09
g9527.t1|PLSI-BOVIN	0.113801	0.08	0.019	5.86443e-09
g9117.t1	0.252441	0.165	0.08	9.10948e-09
g29090.t1	0.125489	0.085	0.021	9.68985e-09
g595.t1|PRDX4-BOVIN	-0.265814	0.255	0.352	1.05565e-08
g7356.t1|MILK2-RAT	0.237102	0.479	0.375	1.54005e-08
g15493.t1|OFUT2-MOUSE	0.185154	0.299	0.188	1.96773e-08
g478.t1	-0.215914	0.134	0.22	2.93467e-08
g22317.t1|RERG-BOVIN	-0.384083	0.203	0.286	3.92893e-08
g26884.t1|MCTP1-HUMAN	-0.268939	0.346	0.44	4.35308e-08
g22615.t1|FUT5-GORGO	-0.445351	0.351	0.408	6.86776e-08
g11444.t1|ZSWM4-HUMAN	0.165414	0.157	0.074	7.04502e-08
g3976.t1	-0.278538	0.129	0.209	8.54071e-08
g22718.t1|IPP2-RABIT	0.162966	0.493	0.378	1.17069e-07
g22258.t1|DAG1-MOUSE	0.19336	0.579	0.451	2.28719e-07
g33497.t2|CO5A2-MOUSE	-0.305245	0.228	0.314	2.98984e-07
g21976.t1|DIRA1-HUMAN	0.175417	0.175	0.092	3.20828e-07
g7129.t1|VIAAT-XENLA	0.131527	0.102	0.038	5.78243e-07
g2608.t1|RASLC-DANRE	0.408932	0.222	0.142	6.22196e-07
g9795.t1	0.0828089	0.058	0.011	8.14402e-07
g18439.t1	0.251536	0.108	0.044	1.11196e-06
g7255.t1|SCN60-DROME	0.0672113	0.043	0.004	2.67465e-06
g24936.t1|PSD10-DICDI	0.146749	0.157	0.08	3.64007e-06
g30537.t1|ERO1B-HUMAN	-0.381977	0.442	0.504	3.64415e-06
g24678.t1|VIPA-SALTI	0.103001	0.16	0.082	5.33876e-06
g23047.t1|PLPL9-MOUSE	-0.27464	0.215	0.298	6.24477e-06
g23109.t1	0.308757	0.228	0.15	9.17837e-06
g17908.t1|FBN3-HUMAN	0.0714364	0.074	0.022	9.92977e-06
g9184.t2|KAPR2-DROME	-0.0385838	0.005	0.027	9.95608e-06
g33693.t1|LBP-HUMAN	0.188331	0.082	0.028	1.08211e-05
g4000.t1|APT-YARLI	0.142687	0.105	0.044	1.24727e-05
g9166.t1|CAH2-TRIHK	0.108619	0.129	0.062	2.12022e-05
g24547.t1|H33-TRIPS	0.266663	0.789	0.715	2.28849e-05
g18842.t1|WLS-MOUSE	0.109993	0.111	0.05	3.06995e-05
g11765.t1|GSC-DROME	0.118922	0.06	0.015	3.0761e-05
g15133.t1|PRRT1-RAT	0.164011	0.551	0.451	3.53015e-05
g19363.t1|PLCD4-XENLA	0.110955	0.033	0.001	3.58527e-05
g7319.t1|GRM5-HUMAN	0.0571049	0.054	0.012	3.70112e-05
g7502.t1|CY24B-BISBI	0.0689124	0.04	0.004	4.53518e-05
g15359.t1|ZIC3-HUMAN	0.379257	0.153	0.089	4.56894e-05
g3121.t1|PLS2-BOVIN	0.141231	0.293	0.203	4.83664e-05
g22585.t1|DUS7-MOUSE	0.210078	0.606	0.531	5.40283e-05
g2903.t1|MGT4B-DANRE	0.108219	0.272	0.181	5.84972e-05
g25044.t1	0.236087	0.415	0.31	7.0513e-05
g7262.t1|CTNB-URECA	0.167388	0.416	0.322	7.84247e-05
g12461.t1|SURF4-DROME	-0.228784	0.48	0.553	8.19303e-05
g12236.t1	-0.203177	0.599	0.649	8.65415e-05
g7119.t1|3BP5-HUMAN	0.251641	0.248	0.169	8.81534e-05
g30893.t1|PPA2-ARATH	0.208287	0.431	0.336	0.00010499
g15457.t1|ATX3-RAT	0.152909	0.198	0.121	0.000122578
g24983.t1|ZBED4-HUMAN	0.18512	0.137	0.073	0.000137771
g31283.t1|SYT11-HUMAN	-0.103948	0.047	0.094	0.000186927
g21163.t1	0.0624584	0.041	0.006	0.000218387
g2943.t1|CSRP2-RAT	-0.131023	0.235	0.323	0.000243921
g24822.t1|CALR-RABIT	-0.142157	0.992	0.999	0.000311269
g30573.t1|HLDE-SHESA	0.0885533	0.076	0.028	0.0003139
g10056.t1|VP302-LYCMC	-0.0584922	0.013	0.041	0.000332917
g16788.t1	0.0636796	0.085	0.034	0.000359303
g11780.t1|SP4-MOUSE	-0.117803	0.038	0.08	0.000389827
g11471.t1|CALM-PLAFA	0.37037	0.225	0.155	0.000401248
g31440.t1|NPYR-DROME	-0.0543301	0.008	0.03	0.000469529
g14383.t1	0.269394	0.197	0.131	0.000595104
g14912.t1	0.3848	0.123	0.069	0.000715049
g23720.t1|FOS-CYPCA	-0.174327	0.743	0.795	0.000832821
g2686.t1|AT1A-HYDVU	0.0455849	0.049	0.012	0.0010299
g19355.t1	-0.0784977	0.027	0.063	0.00112297
g14018.t1|POSTN-HUMAN	-0.0578587	0.023	0.056	0.00122931
g5621.t1|PITX1-XENLA	0.059734	0.031	0.003	0.0014955
g27596.t1	-0.0943476	0.037	0.076	0.0016716
g6466.t1|ABR-BOVIN	0.137906	0.058	0.019	0.00168301
g5525.t1|ERG-HUMAN	0.0493017	0.028	0.002	0.00211715
g8784.t1|MOT10-DANRE	0.147532	0.106	0.054	0.00217032
g16168.t1|GRP78-CHICK	-0.219322	0.83	0.879	0.00252925
g24349.t1	0.328746	0.25	0.182	0.00268882
g14801.t1|ZBED4-MOUSE	-0.131447	0.051	0.096	0.00283677
g29832.t1|UB2L3-MOUSE	0.114618	0.89	0.825	0.00311479
g7977.t1|MMP24-MOUSE	0.545326	0.448	0.403	0.00386734
g44.t1|S2611-HUMAN	0.277091	0.182	0.12	0.00391946
g27164.t1|FLNA-HUMAN	0.160032	0.292	0.213	0.00498642
g29030.t1|MTPN-RAT	0.210528	0.304	0.228	0.00505966
g29211.t1|RASA1-RAT	-0.151167	0.092	0.145	0.00527416
g26784.t1|VMPA3-LOXIN	-0.115513	0.03	0.064	0.00906109
g6732.t1|SECG-DICDI	0.0409907	0.022	0	0.00969138
g12710.t1|RAB12-MOUSE	0.122974	0.641	0.538	0.0112464
g29234.t2|SH3R1-XENLA	0.116801	0.227	0.153	0.0117557
g7871.t1	-0.496889	0.126	0.182	0.0119434
g2810.t1	-0.0269926	0.003	0.017	0.0125793
g21055.t1|PDIA4-BOVIN	-0.208515	0.202	0.267	0.0158746
g22100.t1|DESI1-RAT	0.0584778	0.117	0.064	0.0178182
g6652.t1|ADA10-HUMAN	0.161247	0.72	0.658	0.0186613
g2609.t1|WRN-XENLA	0.0824919	0.154	0.094	0.0197496
g24679.t1|VIPB-SALTI	0.0803536	0.279	0.197	0.0199563
g3899.t1|SRSF7-HUMAN	0.132915	0.457	0.376	0.0243453
g1718.t1|CHSTB-RAT	0.219396	0.436	0.355	0.0278164
g29976.t1|SPIR2-HUMAN	-0.315084	0.407	0.446	0.028037
g23249.t1	0.158297	0.314	0.243	0.0285234
g18951.t1|LICH-HUMAN	0.237563	0.258	0.192	0.0287842
g14866.t1|NPYR-DROME	-0.0514334	0.014	0.038	0.0344506
g27852.t2|LRP4-HUMAN	0.0483376	0.043	0.012	0.0364359
g26797.t1|OXIR-STRAT	-0.0926412	0.089	0.138	0.0380141
g24126.t1|FOXA2-ORYLA	0.134777	0.068	0.03	0.0395189
g11978.t1|AL14E-BOVIN	-0.0318129	0.002	0.013	0.0399531
g16204.t1|HMCN1-MOUSE	-0.248408	0.388	0.433	0.0412892
g4304.t1|ACVR1-HUMAN	0.0934092	0.147	0.091	0.0422651
g3419.t1|GNA1-DROME	-0.151517	0.114	0.164	0.0526502
g27008.t1|ASAH1-MOUSE	-0.051254	0.016	0.04	0.0543468
g27170.t1|GMPPB-XENTR	0.0789158	0.3	0.22	0.0551695
g3756.t1|AMERL-PONAB	0.0771362	0.111	0.063	0.0697146
g21088.t1|AT2B3-HUMAN	0.0203325	0.245	0.173	0.0720513
g12447.t1|ELK1-RAT	-0.206787	0.343	0.403	0.0731698
g31723.t1|SSRA-HUMAN	-0.196235	0.451	0.5	0.073398
g33643.t1	0.0939504	0.367	0.289	0.0756674
g20083.t1|CP17A-RANDY	-0.0400152	0.001	0.01	0.0782692
g5051.t1|IRS2B-XENLA	-0.109275	0.077	0.123	0.0795431
g27757.t1	-0.158326	0.086	0.13	0.0943232
g15451.t1|FSHR-HORSE	-0.0378777	0.016	0.04	0.095121
g24294.t1|TEST-MOUSE	-0.0745202	0.248	0.328	0.0954942
g1301.t1	0.104224	0.359	0.276	0.110484
g8603.t1|PKHG7-HUMAN	-0.0590611	0.133	0.193	0.121363
g17988.t1|CRYAB-BOVIN	0.171285	0.546	0.476	0.143676
g1624.t1|PTC1-MOUSE	0.222024	0.12	0.075	0.15018
g2385.t1|RPGP2-HUMAN	-0.184189	0.263	0.321	0.150439
g19975.t1|Y1199-DICDI	-0.0344097	0.013	0.035	0.164636
g14799.t1|ACOT1-HUMAN	-0.0287684	0.006	0.021	0.168522
g25532.t1|RECK-HUMAN	-0.0526146	0.037	0.069	0.171114
g33656.t1|GALE-DICDI	0.0452091	0.193	0.131	0.210684
g18200.t1|RIT2-HUMAN	-0.170932	0.413	0.464	0.248982
g30605.t1|CHST3-CHICK	0.031633	0.032	0.008	0.257394
g9063.t1|FLVC2-HUMAN	-0.0811457	0.081	0.124	0.346147
g29481.t1|LENG9-MOUSE	0.0657618	0.167	0.114	0.438354
g46.t1|S2611-HUMAN	0.0464229	0.052	0.022	0.487847
g564.t1|COX1-METSE	0.0305821	0.027	0.006	0.545294
g19496.t1|CRIP1-RAT	-0.376124	0.505	0.509	0.5522
g11353.t1|OTOL1-MOUSE	0.285775	0.276	0.224	0.582353
g26877.t1|HDC-HUMAN	-0.11134	0.78	0.827	0.598283
g5180.t1	0.194262	0.578	0.488	0.651188
g33496.t2|SON-MOUSE	-0.198934	0.243	0.294	0.678758
g10950.t1	-0.0934112	0.312	0.373	0.682018
g14473.t1	0.0911093	0.091	0.052	0.708812
g15775.t1	0.0240724	0.016	0.001	0.892653
g10818.t1|PK1L2-MOUSE	0.0365797	0.028	0.007	1
g25539.t1|CTP5C-RAT	0.0241322	0.016	0.001	1
g18690.t1|TRPA1-HUMAN	0.0326215	0.026	0.006	1
g4324.t1|ARF-CANAL	-0.107891	0.129	0.173	1
g22555.t1|LAMB1-HUMAN	0.267876	0.323	0.273	1
g270.t1|RLGM2-TRYB2	-0.145687	0.35	0.402	1
g8427.t1|TLL1-XENLA	-0.0346817	0.067	0.105	1
g25127.t1|DMTA2-MONAL	-0.0923103	0.04	0.069	1
g33324.t1	-0.0916943	0.027	0.05	1
g24024.t1|ZFN2B-MOUSE	0.131442	0.285	0.225	1
g28828.t1	-0.131064	0.192	0.241	1
g20700.t1|ARRD3-MOUSE	0.0481845	0.175	0.123	1
g1460.t1|RIOK3-MOUSE	-0.108985	0.735	0.757	1
g23621.t1|BTBD2-HUMAN	0.105963	0.342	0.281	1
g27171.t1|GMPPB-DROME	0.0564212	0.367	0.301	1
g11095.t1|GSH1-MOUSE	0.0370561	0.032	0.011	1
g8942.t1|RHBT1-HUMAN	0.0434374	0.16	0.111	1
g17982.t1|CRYAB-BOVIN	0.0864028	0.331	0.267	1
g32882.t1|GRM8-HUMAN	-0.030681	0.02	0.042	1
g23088.t1|MA1B1-MOUSE	0.074449	0.363	0.297	1
g21076.t2|KIBRA-XENTR	0.0843889	0.165	0.117	1
g18947.t1|UBP38-HUMAN	0.0682492	0.14	0.096	1
g26798.t1|OXIR-STRLI	-0.0259923	0.01	0.025	1
g25771.t1|ANTA-HYDVU	0.108113	0.035	0.013	1
g17880.t1|SPY2-MACFA	-0.0497672	0.493	0.562	1
g28009.t1|UBS3A-DROME	0.0400282	0.248	0.188	1
g28716.t1	0.0794687	0.143	0.098	1
g143.t1|P4HTM-MOUSE	0.0340106	0.022	0.005	1
g6653.t1|ADA10-BOVIN	0.11723	0.574	0.512	1
g20832.t1|DMBT1-RABIT	-0.0686121	0.014	0.032	1
g2288.t1	-0.0333582	0.062	0.096	1
g13759.t1|SSRG-HUMAN	-0.115701	0.849	0.844	1
g15129.t1|NLTP-MOUSE	0.0698311	0.185	0.135	1
g16071.t1|ALA7-ARATH	0.068956	0.302	0.243	1
g18017.t1|FUT5-HUMAN	0.0516563	0.165	0.118	1
g32151.t1	0.0396639	0.032	0.012	1
g10594.t1|XBP1-MOUSE	0.10339	0.668	0.612	1
g1450.t1|JUN-CHICK	-0.108714	0.863	0.862	1
g15629.t1|TNR16-CHICK	0.0931493	0.422	0.364	1
g26799.t1|OXIR-STRAT	-0.0343579	0.019	0.038	1
g10915.t1|BCAT1-MOUSE	0.0394501	0.016	0.003	1
g19215.t1	-0.0621801	0.056	0.085	1
g2266.t1	0.048069	0.025	0.008	1
g7086.t1|AT8B2-HUMAN	-0.190361	0.248	0.285	1
g23252.t1|CRCM-HUMAN	0.0527263	0.133	0.093	1
g25137.t1|NPT2A-RABIT	0.0254267	0.053	0.027	1
g11950.t1|SIK2-MOUSE	0.0556975	0.248	0.196	1
g20096.t1	0.0791024	0.183	0.139	1
g5403.t1|B4GN4-HUMAN	0.0097251	0.4	0.327	1
g27456.t1|RAP1-CAEEL	-0.130655	0.805	0.827	1
g29352.t1	0.0161812	0.01	0	1
g14800.t2|UACA-BOVIN	-0.0176965	0.002	0.01	1
g26213.t1|SUPT3-HUMAN	0.0703521	0.143	0.102	1
g17774.t1|RETST-DANRE	0.0325255	0.09	0.057	1
g33146.t1|S22A3-HUMAN	0.0477616	0.034	0.014	1
g26703.t3	0.0918764	0.288	0.235	1
g27364.t1|PANG1-DROME	0.130542	0.356	0.302	1
g2954.t1|CLAT-RAT	-0.141547	0.077	0.107	1
g28253.t1	0.107725	0.168	0.127	1
g2944.t1|TC1DB-XENLA	-0.0332599	0.019	0.037	1
g11363.t1|CBS-HUMAN	0.0548955	0.037	0.017	1
g25021.t1|HRH2-MOUSE	0.0207887	0.015	0.003	1
g19421.t1|TIF1B-RAT	0.0618572	0.111	0.076	1
g28791.t1	0.013767	0.013	0.002	1
g17635.t1|TRPA1-CAEEL	0.0218963	0.05	0.027	1
g24257.t1	0.050356	0.21	0.163	1
g10650.t1|YQK1-SCHPO	-0.0472527	0.084	0.117	1
g14978.t1	0.137766	0.128	0.095	1
g8976.t1	0.0399342	0.071	0.043	1
g23103.t1	-0.0785129	0.109	0.146	1
g24903.t1|NECA-HYDVU	0.0490758	0.039	0.019	1
g12040.t1	0.0218629	0.023	0.008	1
g14470.t1|MMP14-MOUSE	0.024505	0.011	0.001	1
g4856.t1|IP6K1-RAT	0.0750052	0.232	0.184	1
g29567.t1|FUCTA-DROME	-0.213906	0.322	0.352	1
g11996.t2|TM175-DANRE	0.0571628	0.151	0.11	1
g15640.t1|ZIC2B-XENLA	0.162565	0.158	0.122	1
g25773.t1|ANTA-HYDVU	0.0695772	0.024	0.009	1
g32018.t1|STX1A-DROME	0.0500514	0.473	0.407	1
g26570.t1|LAC2-BOTFU	-0.0382935	0.01	0.023	1
g10850.t1	-0.159369	0.099	0.128	1
g4921.t1	0.0199564	0.012	0.002	1
g27266.t1|LRC58-HUMAN	0.0591329	0.256	0.205	1
g1199.t1|BP10-PARLI	0.0190036	0.009	0	1
g18549.t1	0.0111226	0.009	0	1
g20340.t1	0.238051	0.313	0.256	1
g856.t1|ENDUB-DANRE	0.0599029	0.506	0.462	1
g27236.t1|TISB-MOUSE	0.0579195	0.408	0.349	1
g2004.t1|RHOAA-DANRE	0.122676	0.57	0.519	1
g10933.t1|ST38L-HUMAN	0.0362681	0.102	0.07	1
g20690.t1|ARRD3-RAT	-0.137998	0.143	0.175	1
g28136.t1|ANLN-HUMAN	0.0114231	0.222	0.272	1
g23692.t1|NPRL3-MOUSE	0.0987066	0.21	0.168	1
g25321.t1	0.0367295	0.097	0.067	1
g10649.t1|PDE11-DROME	0.036739	0.1	0.069	1
g28166.t1|PFI-PTIFI	-0.0474908	0.041	0.064	1
g2440.t1	0.0227634	0.034	0.017	1
g11355.t1|CO4A2-ASCSU	0.262156	0.327	0.298	1
g12568.t1	-0.00983874	0.491	0.389	1
g13019.t1|PRPX-HORVU	-0.24173	0.17	0.196	1
g32887.t1	0.0627612	0.039	0.02	1
g31801.t1|MYO6-CHICK	0.00705494	0.088	0.059	1
g7896.t1	0.0274025	0.02	0.007	1
g2010.t1|PKHG5-HUMAN	0.0544533	0.085	0.058	1
g28717.t1	0.020104	0.038	0.02	1
g15120.t1|DDAH1-MOUSE	-0.108429	0.175	0.21	1
g32290.t1|TREF1-HUMAN	0.0281105	0.057	0.035	1
g32982.t1|PDIA6-PONAB	-0.12488	0.717	0.736	1
g8909.t1	-0.0319169	0.033	0.052	1
g29257.t1|SGCG-CANLF	0.0624024	0.214	0.173	1
g27920.t1|PRSS8-MOUSE	0.0306161	0.009	0.001	1
g26083.t1|LOX5-MESAU	-0.00404598	0	0.003	1
g24406.t1|FGFR1-HUMAN	-0.113701	0.187	0.221	1
g22557.t1|ZN235-MOUSE	0.0421316	0.381	0.324	1
g21491.t1|TLR1-DROME	0.0177149	0.022	0.009	1
g16879.t1|UBC12-DROME	-0.122249	0.169	0.2	1
g18524.t1	0.0423136	0.074	0.05	1
g15015.t1|HE-PARLI	0.178461	0.224	0.188	1
g1064.t1|TFPI1-MACMU	0.0837701	0.057	0.036	1
g25176.t1|SQSTM-PONAB	0.167207	0.697	0.672	1
g22990.t1|GULP1-DANRE	0.0948492	0.307	0.261	1
g30759.t1|CEL3B-MOUSE	-0.0214885	0.022	0.037	1
g4174.t1|SWP70-CHICK	0.0738447	0.116	0.087	1
g26787.t1	-0.137071	0.08	0.104	1
g29412.t1|ECE1-CAVPO	0.107268	0.295	0.259	1
g10513.t1|MCTS1-MOUSE	0.0338911	0.457	0.401	1
g18373.t1	0.147176	0.118	0.092	1
g25724.t1|FNTA-HUMAN	0.0696347	0.238	0.198	1
g28168.t1|LIN41-DANRE	0.01335	0.006	0	1
g12783.t1|RAB23-HUMAN	0.0478346	0.225	0.185	1
g19768.t2|RASS-DICDI	0.0156583	0.029	0.014	1
g1439.t1	0.0167997	0.017	0.006	1
g292.t1	0.0156165	0.135	0.104	1
g12061.t1|GFPT2-BOVIN	0.0697813	0.46	0.403	1
g8947.t1|CHM1B-CHICK	0.0543159	0.266	0.226	1
g27009.t1|BROX-DANRE	0.0438738	0.221	0.182	1
g5459.t1	-0.00639088	0.001	0.004	1
g1782.t1|GSHB-XENLA	0.0347269	0.086	0.061	1
g15293.t1|GDF8-OREMO	-0.0278971	0.014	0.026	1
g20792.t1|SBSPO-HUMAN	0.278408	0.271	0.324	1
g13225.t1|PRP4-HUMAN	0.0466501	0.136	0.106	1
g8688.t1	0.0461456	0.22	0.182	1
g19288.t1|TUTL-DROME	0.0295062	0.021	0.01	1
g25079.t1	0.288991	0.085	0.062	1
g8591.t1|ANO7-MOUSE	0.0105119	0.005	0	1
g26569.t1|LAC3-BOTFU	-0.0576932	0.033	0.05	1
g1320.t1|SULF1-MOUSE	0.0398397	0.132	0.102	1
g22286.t1|TSN9-SHEEP	-0.138058	0.283	0.307	1
g11692.t1|RIPL1-MOUSE	0.0458	0.191	0.158	1
g4713.t1|MKL2-HUMAN	-0.0961109	0.23	0.258	1
g7964.t1|KCNB1-MOUSE	-0.0585115	0.042	0.06	1
g27959.t2|KCNH1-RAT	0.00745462	0.007	0.001	1
g11021.t1|DFFB-HUMAN	0.0792719	0.117	0.091	1
g1608.t2|VLDLR-HUMAN	-0.139301	0.331	0.353	1
g30222.t1	-0.0574433	0.386	0.416	1
g32753.t1	-0.0424557	0.018	0.03	1
g22221.t1	0.0226864	0.017	0.007	1
g11352.t1|CO4A1-DROME	0.202811	0.401	0.368	1
g8968.t1|NAS4-CAEEL	-0.125835	0.301	0.321	1
g23352.t1	0.0106449	0.009	0.002	1
g27641.t1|AKTS1-MOUSE	0.0351962	0.103	0.078	1
g21095.t1|JADE3-MOUSE	0.0107515	0.104	0.079	1
g31631.t1|LARP6-HUMAN	0.16028	0.548	0.517	1
g29527.t1|SRSF4-MOUSE	0.0484074	0.283	0.244	1
g14502.t1|NUDT9-HUMAN	0.090567	0.458	0.415	1
g8621.t1|PAB4L-HUMAN	0.0215204	0.01	0.003	1
g18525.t1|ZN609-HUMAN	0.0505477	0.26	0.22	1
g4389.t1|CADN-ACRMI	0.00531375	0.005	0	1
g4815.t1|OAT-DROME	0.0519259	0.27	0.231	1
g31735.t1|EAA1-AMBTI	-0.0660291	0.032	0.047	1
g2402.t1|ATS9-HUMAN	-0.00179244	0	0.002	1
g17506.t1|AT12A-HUMAN	-0.00459766	0.013	0.023	1
g3966.t1|LRRK1-HUMAN	0.0303138	0.071	0.051	1
g21488.t1|OPN4B-XENLA	-0.00937347	0.001	0.005	1
g22665.t1|PRSS8-RAT	0.0289694	0.016	0.007	1
g12277.t1|MANEA-HUMAN	-0.0109126	0.121	0.095	1
g25824.t1	0.0533126	0.065	0.046	1
g22348.t1	0.0316434	0.024	0.012	1
g8004.t1|KTNB1-ARATH	-0.0417785	0.047	0.065	1
g30639.t1|NAS13-CAEEL	0.0202348	0.318	0.279	1
g29039.t1|RBL1-MOUSE	0.0275375	0.034	0.02	1
g4318.t1	-0.0189455	0.011	0.02	1
g194.t1|PTRB-MORLA	0.017305	0.027	0.015	1
g14107.t1|RIMK-SERP5	0.0609118	0.283	0.246	1
g7398.t1|PAPSS-URECA	0.106353	0.531	0.504	1
g33240.t1	-0.0164896	0.014	0.024	1
g24307.t1|GRM7-MOUSE	0.00434233	0.006	0.001	1
g28785.t1	-0.104629	0.093	0.114	1
g26250.t1	0.036712	0.073	0.054	1
g28448.t1	0.115265	0.08	0.062	1
g1176.t1|LAMB1-HUMAN	0.00503609	0.004	0	1
g27625.t1|ZIC4-HUMAN	0.00491041	0.004	0	1
g19677.t1|CIAO1-NEMVE	0.0572708	0.113	0.089	1
g28706.t1|ADPGK-MOUSE	0.0168234	0.145	0.117	1
g3974.t1|GNPTG-MOUSE	0.0390482	0.091	0.069	1
g13309.t1|SYIC-HUMAN	-0.0561068	0.095	0.116	1
g7648.t1	0.258491	0.339	0.326	1
g24716.t1|E41L4-DANRE	0.00370771	0.053	0.036	1
g33493.t2|FOXO-DROAN	-0.00843737	0.001	0.004	1
g28498.t1|S22AI-MOUSE	-0.00318364	0.001	0.004	1
g10967.t1	0.0193439	0.02	0.011	1
g1435.t1	0.00829114	0.014	0.006	1
g28784.t1	-0.00615018	0	0.003	1
g13020.t1|PRPX-HORVU	-0.258923	0.169	0.184	1
g33185.t1|PK1L2-HUMAN	0.00856512	0.009	0.003	1
g11204.t1|CFAD-DICDI	0.00766255	0.012	0.004	1
g2273.t1	-0.128722	0.279	0.301	1
g4386.t1	0.0341905	0.034	0.021	1
g20553.t1|LCE-ORYLA	0.00962633	0.019	0.01	1
g1942.t1|NGBR-DANRE	0.0192822	0.137	0.112	1
g11354.t1|MATN1-CHICK	0.129132	0.181	0.159	1
g9365.t1|MMP24-MOUSE	0.0490972	0.13	0.106	1
g18700.t1|ABHD2-MOUSE	0.0164278	0.129	0.103	1
g7128.t1|VIAAT-XENLA	0.00618336	0.004	0	1
g1642.t1|DEFI8-BOVIN	0.0317196	0.05	0.035	1
g15458.t1|SFXN1-SHEEP	-0.00752055	0.01	0.018	1
g10817.t1|SUREJ-STRPU	0.0182345	0.016	0.008	1
g30894.t1|FGFR-HYDVU	-0.0448195	0.03	0.043	1
g30956.t1|LIN41-DANRE	-0.00727509	0.004	0.009	1
g26375.t1|CDO1-DANRE	0.0148594	0.175	0.145	1
g17949.t1|NPHP3-HUMAN	0.00664838	0.009	0.003	1
g25364.t1|CALM-PNECA	0.050143	0.675	0.646	1
g18737.t1|FREM2-MOUSE	-0.00478311	0.006	0.012	1
g23878.t1|NEK9-XENLA	0.0422057	0.036	0.024	1
g26809.t1	0.0740501	0.419	0.38	1
g12822.t1	-0.17135	0.265	0.291	1
g1705.t1|ANR44-HUMAN	-0.0332566	0.138	0.164	1
g2689.t1|TOB1A-XENLA	0.0305741	0.026	0.016	1
g13748.t1	0.00782111	0.007	0.002	1
g5003.t2|GAPR1-MOUSE	0.00839238	0.016	0.008	1
g6779.t1	-0.0337694	0.063	0.081	1
g5758.t1	-0.00598645	0.078	0.059	1
g20613.t1	0.0494197	0.043	0.03	1
g17270.t1|PA2-APIME	0.0109511	0.005	0.001	1
g22916.t1|GDF6A-DANRE	0.00432908	0.017	0.009	1
g28301.t1|MRC1-HUMAN	0.0374866	0.029	0.019	1
g11588.t1	-0.0127258	0.003	0.008	1
g11501.t1	0.0416708	0.21	0.181	1
g5530.t1|DNJC3-BOVIN	-0.123222	0.131	0.149	1
g25927.t1	0.00616229	0.047	0.034	1
g19216.t1|EDEM3-XENLA	0.00335	0.148	0.123	1
g2738.t1|SMHD1-MOUSE	-0.0155136	0.016	0.025	1
g24876.t1	0.0473696	0.027	0.017	1
g14239.t2|DUS9-HUMAN	-0.0031358	0.001	0.004	1
g21702.t1|S26A6-MOUSE	0.00969653	0.009	0.004	1
g14987.t1|SBP1-XENTR	0.00936518	0.043	0.03	1
g5660.t1|CO6A5-HUMAN	-0.00240857	0.004	0.009	1
g16491.t1|CREB-HYDVD	-0.0661158	0.507	0.519	1
g5757.t1|AFG2-YEAST	0.0318515	0.303	0.274	1
g11058.t1|C9MT-KOMPG	-0.110819	0.309	0.323	1
g17891.t1|AB22G-ARATH	-0.0215911	0.119	0.141	1
g7113.t1|MBD5-HUMAN	0.00430277	0.125	0.104	1
g16557.t1|VAB15-CAEEL	-0.0122276	0.005	0.011	1
g9169.t1|CAH2-TRIHK	0.0178317	0.031	0.02	1
g21798.t2|S35D3-HUMAN	-0.00661843	0.005	0.011	1
g22226.t1|PNCA-ECOLI	-0.0318834	0.035	0.047	1
g27534.t1	0.0451555	0.028	0.019	1
g29786.t1|DJC10-HUMAN	-0.112896	0.144	0.16	1
g19927.t1|APOA4-HUMAN	0.0114392	0.008	0.003	1
g1096.t1|UBC-RAT	-0.0628854	0.907	0.896	1
g21056.t1|PDIA4-BOVIN	-0.0672397	0.125	0.143	1
g8798.t1|GVIN1-HUMAN	-0.00881395	0.001	0.004	1
g29497.t1|FNIP1-MOUSE	0.0528142	0.226	0.202	1
g13063.t1	-0.0127679	0.009	0.015	1
g5410.t1	0.108068	0.334	0.306	1
g13544.t2|SDCB1-HUMAN	0.0262116	0.624	0.585	1
g15165.t1|NADK-MOUSE	0.0169727	0.015	0.008	1
g11470.t1|ZSC31-HUMAN	0.10354	0.138	0.121	1
g23304.t2|MASP1-RAT	-0.00240772	0.092	0.074	1
g11714.t1|TRPM3-HUMAN	0.0184102	0.019	0.012	1
g24039.t1|ALG11-MOUSE	-0.00891473	0.125	0.103	1
g32332.t1|LOL2B-DANRE	-0.00439037	0.033	0.044	1
g33581.t2	-0.0178746	0.492	0.523	1
g31060.t1|GALT6-HUMAN	0.00663144	0.207	0.182	1
g28042.t1|ARHB-XENLA	0.159439	0.189	0.173	1
g11528.t1|CO1A2-RAT	0.357302	0.404	0.376	1
g9857.t1|TREC-BACSU	-0.0474312	0.123	0.142	1
g30174.t1|PTHD3-MOUSE	0.00208328	0.026	0.017	1
g11134.t1	-0.426786	0.323	0.327	1
g19310.t1|HYUA-PSESN	0.020284	0.041	0.03	1
g16330.t1|HSP13-HUMAN	-0.0901412	0.194	0.209	1
g23347.t1|DAG1-PIG	0.00728273	0.004	0.001	1
g16493.t1	0.0097513	0.004	0.001	1
g5112.t1|R213A-DANRE	-0.010697	0.007	0.012	1
g5217.t1	-0.000588007	0	0.001	1
g6980.t1	-0.00259563	0	0.001	1
g22025.t1|PDI21-ORYSJ	-0.00364588	0	0.001	1
g25238.t1|MAEL-XENTR	0.0460433	0.277	0.249	1
g13619.t1	0.0122958	0.015	0.009	1
g1743.t1|LAMA4-HUMAN	0.100279	0.137	0.122	1
g947.t2|FGF12-RAT	-0.00665305	0.003	0.007	1
g5947.t1|TM151-CAEBR	0.0902199	0.222	0.203	1
g5731.t1|E2F7-BOVIN	0.0531622	0.197	0.176	1
g32331.t1|OMA1-BOVIN	0.0175191	0.032	0.023	1
g30762.t1|TIAR-HUMAN	0.0118684	0.354	0.32	1
g3220.t1|COMA-CONMA	0.034699	0.028	0.019	1
g18029.t1	0.0693265	0.108	0.093	1
g17730.t1|TM86A-HUMAN	-0.0362964	0.065	0.078	1
g5880.t1	0.00469191	0.002	0	1
g370.t1|EVA1C-PANTR	0.00239236	0.002	0	1
g1473.t1|GDF8-TAUDE	-0.000438292	0.005	0.009	1
g7675.t1|FOXK1-MOUSE	-0.0499888	0.064	0.076	1
g2984.t1	0.0242167	0.213	0.192	1
g20537.t1|BLC-VIBCH	-0.0518271	0.073	0.087	1
g26061.t1|MASP1-HUMAN	0.00465684	0.004	0.001	1
g18982.t1|BRAF-COTJA	0.00465105	0.008	0.004	1
g4402.t1|CADN-ACRMI	0.00236131	0.004	0.001	1
g17848.t1|AP2B-HUMAN	-0.0151068	0.006	0.011	1
g31900.t1|SRCH-HUMAN	0.0109017	0.01	0.005	1
g22058.t1|FBP1-STRPU	0.00287483	0.006	0.003	1
g20685.t1|PRY1-YEAST	0.0596015	0.034	0.025	1
g30630.t1|BP10-PARLI	-0.000398043	0.023	0.015	1
g11994.t1	0.001449	0.002	0.005	1
g2806.t1|ECE1-CAVPO	0.0108998	0.018	0.012	1
g8497.t1|CO1A2-LITCT	0.190944	0.468	0.424	1
g4409.t1|Y1760-MYCTU	-0.161205	0.158	0.176	1
g12992.t1|CHSTB-RAT	-0.00224238	0.011	0.006	1
g12951.t1	-0.00918886	0.018	0.025	1
g30200.t1|SC6A1-RAT	-0.0105685	0.043	0.054	1
g1338.t1|CTXA-CARAL	0.0167738	0.019	0.012	1
g24130.t1|S2611-MOUSE	-0.0582933	0.051	0.061	1
g33450.t1|G3ST1-BOVIN	0.00204694	0.002	0	1
g12259.t1|AGRB3-MOUSE	0.00134752	0.002	0	1
g14746.t1|ATS10-HUMAN	0.00645791	0.006	0.003	1
g22822.t1	0.00228193	0.003	0.001	1
g22734.t1|LAMP1-HUMAN	0.0975495	0.221	0.208	1
g17371.t1|SYCC-CHICK	0.038924	0.406	0.383	1
g8690.t1|CCNT2-MOUSE	0.0130136	0.102	0.088	1
g19973.t1|HE-HEMPU	0.00455243	0.005	0.002	1
g20769.t1|IRX6-HUMAN	-0.0846117	0.448	0.452	1
g2011.t2|PKHG5-HUMAN	-0.01946	0.013	0.019	1
g12639.t1	0.00974445	0.035	0.027	1
g14213.t1	0.0113191	0.042	0.033	1
g21006.t1|ASPG-DIRIM	-0.0515483	0.109	0.091	1
g23916.t1	0.161895	0.349	0.346	1
g9001.t1|AT133-HUMAN	0.00207997	0.047	0.037	1
g29966.t1|H2A-ASTRU	0.00718142	0.038	0.029	1
g6351.t1|KIF17-HUMAN	0.0258089	0.293	0.267	1
g13801.t1|YL662-MIMIV	0.0207198	0.096	0.112	1
g15226.t1|ARX-RAT	0.0013844	0.007	0.004	1
g31098.t1|S35B1-MOUSE	-0.0614243	0.15	0.163	1
g8917.t1|FGF2-CHICK	-0.0025883	0.12	0.105	1
g2068.t1	-0.048463	0.053	0.063	1
g26583.t2|TENS1-HUMAN	0.0132036	0.008	0.004	1
g30826.t1	0.00870277	0.008	0.004	1
g21760.t1|NAS4-CAEEL	0.0312231	0.018	0.012	1
g18303.t1|FBP1-STRPU	0.00128575	0.008	0.004	1
g22197.t1|DCOR-TRYBB	0.000348037	0.012	0.007	1
g1125.t1|PLIN5-HUMAN	-0.0312896	0.514	0.517	1
g11469.t1	0.0180654	0.054	0.044	1
g23186.t1	0.00699822	0.004	0.002	1
g18986.t1|BRAF-HUMAN	0.00365389	0.004	0.002	1
g25080.t1	0.342063	0.117	0.104	1
g12280.t1|EMC2-DANRE	0.0163756	0.258	0.236	1
g28800.t1|CUBN-HUMAN	0.00259672	0.001	0	1
g5035.t1	0.0164832	0.014	0.009	1
g2955.t1	-0.00141763	0.008	0.012	1
g9204.t1|CTR2-CHICK	-0.00852799	0.138	0.157	1
g12458.t1|PLPL2-RAT	0.0019203	0.036	0.028	1
g24008.t1|PRY3-YEAST	-0.00211629	0.001	0.003	1
g32919.t1	-0.00637304	0.001	0.003	1
g17465.t1|GORS2-HUMAN	-0.101327	0.192	0.202	1
g30700.t1|DUS16-HUMAN	-0.0692351	0.611	0.629	1
g23418.t1|RLP24-MOUSE	-0.0448559	0.737	0.732	1
g15913.t1|KCNK9-XENLA	-0.0257083	0.014	0.019	1
g23069.t1	-0.00407223	0.039	0.031	1
g25747.t4|COCA1-HUMAN	-0.0169009	0.017	0.022	1
g27612.t1|HEXDC-HUMAN	-0.0184917	0.053	0.043	1
g12434.t1|ELK1-RAT	0.00326688	0.005	0.003	1
g4469.t1	0.00240216	0.005	0.003	1
g25416.t1|PLOD1-CHICK	0.0189465	0.232	0.255	1
g26573.t1|LAC2-BOTFU	-0.00680177	0.01	0.014	1
g23048.t1|PLPL9-RAT	-0.00460889	0.058	0.067	1
g3337.t1|UBP32-HUMAN	0.0152322	0.014	0.01	1
g28273.t1	-0.00731736	0.214	0.19	1
g8864.t1|STIP1-HUMAN	-0.0474979	0.678	0.681	1
g4024.t1	0.00925473	0.014	0.01	1
g19230.t1|AIF1L-MOUSE	0.043227	0.465	0.431	1
g33141.t1|OCT4-ARATH	0.00896972	0.004	0.002	1
g2762.t1	-0.000834556	0.002	0.004	1
g3099.t1|GRM3-MOUSE	0.000775875	0.006	0.004	1
g10737.t1|PLCX1-ARTBC	-0.00347535	0.002	0.004	1
g13376.t1|ITIH3-RABIT	-0.0521342	0.475	0.482	1
g15980.t1|NAV3-HUMAN	0.000242161	0.067	0.057	1
g26848.t1	0.0632622	0.079	0.069	1
g33278.t1|CC124-DANRE	-0.00839223	0.161	0.146	1
g24323.t1	0.00277216	0.001	0	1
g28068.t1	0.00220675	0.001	0	1
g17372.t1|LAMB2-HUMAN	0.00188387	0.001	0	1
g20826.t1|C163A-CANLF	0.00186279	0.001	0	1
g8735.t1|PK1L2-HUMAN	0.00155735	0.001	0	1
g17469.t1	0.00114841	0.001	0	1
g29616.t3	0.00102553	0.001	0	1
g8745.t2	-0.0098421	0.002	0.004	1
g2328.t1|JUN-SERCA	-0.0196605	0.003	0.005	1
g24398.t1|VGLU1-XENLA	0.00550668	0.009	0.005	1
g18016.t1|FUT3-BOVIN	0.0122789	0.011	0.007	1
g13749.t1|SYNE2-HUMAN	0.0159252	0.012	0.008	1
g1254.t2	0.00613299	0.006	0.004	1
g27455.t1|PLC-STAAE	0.00435828	0.009	0.012	1
g33186.t1|PKD2-ORYLA	0.00258615	0.006	0.004	1
g28986.t1	0.00101823	0.006	0.004	1
g31252.t1|NADA-APLKU	-0.0105231	0.008	0.012	1
g23880.t1|CNPY4-HUMAN	0.0134402	0.004	0.002	1
g7832.t1|GRP1-HUMAN	0.00948987	0.017	0.012	1
g33739.t1|MD12L-MOUSE	-0.00518803	0.084	0.074	1
g30648.t1|NAS4-CAEEL	-0.00810597	0.004	0.002	1
g30081.t1|F214A-HUMAN	0.00507125	0.097	0.086	1
g15185.t1|AMPE-PIG	0.00711618	0.007	0.004	1
g22087.t1|GTPB1-XENLA	0.0190246	0.094	0.084	1
g22655.t1|BAX-RAT	-0.0505227	0.212	0.222	1
g3650.t1|SO4C1-MOUSE	0.00661012	0.002	0.001	1
g5130.t1|PUM2-HUMAN	0.0192551	0.144	0.13	1
g19890.t1	0.00244616	0.023	0.018	1
g12231.t1|EQST-ACTEQ	-0.012964	0.006	0.009	1
g28839.t1|S35F3-HUMAN	0.00568745	0.009	0.006	1
g3411.t1	0.00760189	0.023	0.018	1
g11698.t1|NAS4-CAEEL	0.018786	0.014	0.011	1
g2866.t1	0.0023201	0.021	0.017	1
g18215.t1|SYT15-HUMAN	0.028089	0.024	0.019	1
g32789.t1|FAT4-MOUSE	0.00882861	0.013	0.01	1
g5883.t1|SAL-SILAS	-0.0265654	0.012	0.015	1
g22869.t1	-0.000740621	0.024	0.019	1
g29262.t1|BOLL-MACFA	-0.00282404	0.001	0.003	1
g4403.t1|CADN-ACRMI	-0.00738698	0.001	0.003	1
g22852.t1|TUT4-HUMAN	0.0109353	0.022	0.018	1
g9572.t1|ASPX-HUMAN	-0.0064649	0.004	0.006	1
g10706.t1|FKBP2-CRYNJ	-0.00713079	0.004	0.006	1
g26936.t1|NOTCH-DROME	0.00231837	0.001	0	1
g2790.t1|P52K-HUMAN	0.00105448	0.001	0	1
g15578.t1	0.00093911	0.001	0	1
g30359.t1|RBMS1-HUMAN	0.000919783	0.001	0	1
g25854.t1|OPN3-HUMAN	0.000840451	0.001	0	1
g24777.t1|OTOP2-HUMAN	0.000835007	0.001	0	1
g1858.t1|SOX1B-DANRE	0.000306417	0.001	0	1
g30307.t1	0.013977	0.061	0.054	1
g5988.t1|AMID-ECOLI	0.120484	0.145	0.138	1
g637.t1|GGHA-DICDI	0.00183313	0.008	0.005	1
g18743.t1|FREM2-HUMAN	-0.0123812	0.031	0.036	1
g30647.t1|NAS15-CAEEL	-0.000740131	0.008	0.005	1
g5218.t1|COMA-CONMA	0.069547	0.052	0.059	1
g30584.t1|KSR2-MOUSE	-0.00548624	0.026	0.021	1
g4537.t1|MSH3-HUMAN	0.00309365	0.01	0.007	1
g7264.t1|GMPPA-XENTR	0.0186865	0.12	0.11	1
g8764.t1	0.0111965	0.058	0.051	1
g25581.t1|SYNC-BOVIN	-0.0270696	0.476	0.448	1
g15069.t1|WDR70-XENTR	0.0237848	0.165	0.154	1
g17795.t1|MEP1B-MOUSE	0.00369039	0.002	0.001	1
g8165.t2|FBP1-STRPU	0.00398207	0.002	0.001	1
g14514.t1	-0.00128572	0.002	0.001	1
g21713.t1|S26A6-MOUSE	0.0123931	0.017	0.013	1
g13514.t1|GTPB2-HUMAN	0.03402	0.161	0.15	1
g29169.t1	0.00162571	0.005	0.004	1
g7775.t1|BAX-BOVIN	0.00840394	0.054	0.048	1
g24360.t1|CALUB-DANRE	-0.0156501	0.529	0.528	1
g1696.t1|AGRL2-HUMAN	-0.00496216	0.005	0.007	1
g25362.t1|MEGF6-RAT	-0.00482181	0.008	0.005	1
g33605.t1|INX3-DROME	-0.00711804	0.012	0.009	1
g29308.t1|ACSF4-HUMAN	0.00214771	0.025	0.021	1
g22088.t1|GTPB1-RAT	-0.0101365	0.035	0.03	1
g17212.t1|TRPA1-CAEEL	-0.00364884	0.004	0.006	1
g20637.t1|MEF2A-BOVIN	-0.0852007	0.309	0.314	1
g8465.t1	0.0028104	0.003	0.002	1
g7427.t1	-0.000872976	0	0.001	1
g21247.t1|R213A-DANRE	0.000331786	0	0.001	1
g22137.t1|5HT2A-PIG	-0.000964629	0	0.001	1
g16717.t1|HTPG-RICCN	0.00192612	0.017	0.02	1
g1253.t1	-0.00717547	0.004	0.005	1
g31061.t1|GALT5-DROME	-0.0298397	0.196	0.183	1
g9227.t1|CK054-XENLA	-0.0516087	0.162	0.149	1
g22919.t1|OTOF-DANRE	0.00195705	0.004	0.005	1
g16973.t1|NGB-CANLF	0.00489518	0.004	0.003	1
g13307.t1|SYIC-HUMAN	-0.0491849	0.08	0.085	1
g20117.t1	-0.019042	0.042	0.046	1
g23108.t2|B4GN3-HUMAN	0.000544493	0.007	0.009	1
g32263.t1|PYG-DROME	0.0350501	0.188	0.18	1
g32625.t1|APX1-HYDVD	0.0125311	0.032	0.028	1
g14000.t1|LAMA-DROME	0.0431932	0.063	0.058	1
g20552.t1|VMP-NEMVE	0.00216985	0.011	0.009	1
g30219.t1|FXC2B-XENLA	0.170671	0.264	0.267	1
g15442.t1	0.0867413	0.181	0.177	1
g20857.t1|AGRD1-BOVIN	-0.000983743	0.005	0.004	1
g2061.t1|GPR98-MOUSE	0.000814308	0.006	0.008	1
g7652.t2|KI26A-MOUSE	-0.0585668	0.244	0.227	1
g14694.t1|VPS72-XENLA	-0.0556719	0.243	0.249	1
g604.t1	-0.00528596	0.002	0.003	1
g24037.t1	-0.00217098	0.001	0.002	1
g18285.t1	0.00166336	0.002	0.001	1
g28783.t1	-0.021962	0.098	0.091	1
g26858.t1|DRD1-XENLA	-0.0024788	0.014	0.017	1
g6164.t1|CNTP2-HUMAN	0.00639463	0.011	0.009	1
g23571.t1	-0.0220169	0.194	0.182	1
g21025.t1	-0.00273031	0.017	0.014	1
g19567.t1|SRS10-MOUSE	-0.00455811	0.467	0.446	1
g15375.t1	-0.00684305	0.011	0.009	1
g5483.t1|CTXA-CARAL	-0.000116031	0.005	0.006	1
g11351.t1|CO4A1-BOVIN	0.020799	0.07	0.076	1
g24476.t1|FBP1-STRPU	-0.000312552	0.005	0.006	1
g22319.t2|KDIS-DANRE	-0.17914	0.189	0.184	1
g1063.t1|VKT5-ANEVI	0.0366566	0.038	0.035	1
g6182.t1	0.00863208	0.008	0.006	1
g19275.t1|SIK3-DANRE	0.0205905	0.089	0.083	1
g23371.t1|GAPR1-MOUSE	0.00128007	0.004	0.003	1
g16805.t1|USH2A-HUMAN	0.00235355	0.004	0.003	1
g22086.t1|GTPB1-XENLA	0.00332419	0.005	0.004	1
g8661.t1|ZN624-HUMAN	0.0201254	0.104	0.098	1
g30938.t1|FBXL7-HUMAN	-0.0235909	0.133	0.137	1
g20037.t1	-0.0229023	0.032	0.035	1
g25768.t1|PANK4-PONAB	0.00811587	0.009	0.011	1
g29781.t1|DVL2-XENTR	-0.0112509	0.052	0.048	1
g33633.t1	-0.00612116	0.003	0.004	1
g8972.t1|TMED9-MOUSE	-0.0725571	0.291	0.291	1
g12571.t1|TSN5-BOVIN	0.000884446	0.006	0.007	1
g19984.t1|SKI-XENLA	0.00171484	0.264	0.253	1
g24228.t1|KLH20-XENLA	-0.00888434	0.037	0.034	1
g17667.t1|BIG3-MOUSE	-0.00560952	0.009	0.007	1
g26299.t1|BIRC6-HUMAN	0.00600545	0.033	0.03	1
g18022.t1	0.0156485	0.055	0.058	1
g22680.t1|CNIF3-ARATH	0.00893181	0.088	0.084	1
g29986.t1|SZT2-HUMAN	-0.000760031	0.012	0.011	1
g8682.t1	-0.00204311	0.005	0.006	1
g11880.t1|COOA1-HUMAN	0.0441391	0.059	0.063	1
g15.t1|FNTB-BOVIN	-0.0176029	0.096	0.1	1
g24129.t1|UB2G2-PONAB	-0.0349067	0.204	0.195	1
g13587.t1|PRLHR-RAT	-0.0017216	0.004	0.004	1
g16227.t1|NK2R-CAVPO	0.00115645	0.001	0.001	1
g27351.t1|Y4781-DICDI	-0.00507436	0.16	0.152	1
g14220.t1	-0.00606548	0.004	0.005	1
g24356.t1	-0.147993	0.264	0.255	1
g22132.t1	-0.0133715	0.037	0.035	1
g15679.t1	0.165238	0.369	0.415	1
g7633.t1|PIGL-MOUSE	-0.039855	0.052	0.054	1
g31086.t1	0.00399193	0.006	0.007	1
g3460.t1|NAS4-CAEEL	0.0012468	0.007	0.006	1
g23193.t1|NFH-MOUSE	0.00378405	0.014	0.012	1
g2398.t1|HMCN1-MOUSE	-0.000775299	0.004	0.004	1
g6624.t1	-0.00476351	0.001	0.002	1
g15494.t1|VWDE-HUMAN	0.00040552	0.001	0.002	1
g28994.t1|LAMB1-MOUSE	-0.00166165	0.001	0.002	1
g32935.t1|AGRB3-MOUSE	-0.00403439	0.007	0.008	1
g20774.t1|Y103-SYNY3	-0.114692	0.391	0.37	1
g6659.t1|SAP3-MACFA	0.00354631	0.007	0.008	1
g1539.t1	0.00257655	0.004	0.004	1
g2959.t1	0.00230949	0.027	0.028	1
g2461.t1|PAX2A-DANRE	-0.0106316	0.017	0.016	1
g15095.t1|GGT1-HUMAN	-0.00503267	0.003	0.004	1
g32592.t1|SC5A7-CAEEL	-0.0145906	0.056	0.058	1
g21761.t1|DMRT2-HUMAN	0.00202257	0.003	0.004	1
g22186.t1|ADA1A-ORYLA	-0.0444889	0.082	0.083	1
g24930.t1|RT10-DANRE	-0.0358622	0.359	0.356	1
g18952.t1|ATS3-HUMAN	0.0299699	0.046	0.048	1
g13803.t1|FLAD1-XENLA	-0.00713208	0.059	0.06	1
g2908.t1|S39AA-DANRE	-0.000884462	0.047	0.045	1
g32336.t1|THAP9-HUMAN	0.00702564	0.013	0.012	1
g24677.t1|HHEX-HUMAN	0.0186181	0.075	0.078	1
g25557.t1|OPN3-HUMAN	-0.00727184	0.001	0.001	1
g16500.t1|KLC-DROME	-0.000202464	0.001	0.001	1
g32459.t1	-0.000432923	0.001	0.001	1
g10932.t1|CHIB-TOBAC	-0.000989353	0.001	0.001	1
g2784.t1	0.0101107	0.001	0.001	1
g11398.t1|LRC40-DANRE	-0.0460322	0.126	0.126	1
g6387.t1|MDR1-HUMAN	-0.011517	0.03	0.031	1
g14688.t1|KIF7-DICDI	-0.0791206	0.205	0.2	1
g19422.t1	0.000265768	0.018	0.019	1
g5466.t1|CTXA-CARAL	-0.0118737	0.016	0.017	1
g15668.t1|FBP1-STRPU	0.00251827	0.002	0.002	1
g13448.t1|MYB-XENLA	-0.0623207	0.154	0.153	1
g6850.t1|ZPP-ACRMI	0.0427985	0.13	0.134	1
g15667.t1|P4HA1-RAT	0.00506931	0.02	0.021	1
g26244.t1|IF4G1-HUMAN	-0.00628906	0.002	0.003	1
g6623.t1|ARSI-RAT	-0.00410275	0.002	0.003	1
g18331.t1	0.0447747	0.017	0.017	1
g23858.t1|TERT-CANLF	0.000833738	0.13	0.127	1
g33275.t2|KLH20-PONAB	-0.000485233	0.004	0.004	1
g69.t1|TLL1-DANRE	-0.00416915	0.018	0.018	1
g32199.t1|HEXA-HUMAN	-0.0114248	0.005	0.004	1
g12585.t1|SVEP1-MOUSE	0.00584209	0.017	0.017	1
g33803.t1	0.000680199	0.001	0.001	1
g1461.t1	-0.0160577	0.021	0.02	1
g21270.t1|KPSH1-BOVIN	0.00749495	0.024	0.025	1
g507.t1|SOX2-CHICK	-0.0514155	0.07	0.069	1
g27772.t1|BGB-DROME	0.0325962	0.131	0.131	1
g7978.t1|S35A3-CANLF	-0.0126661	0.079	0.078	1
g27312.t1	0.00430252	0.135	0.136	1
g181.t1|ZNT1-MOUSE	0.173634	0.134	0.141	1
g28083.t2|MCTP1-HUMAN	1.27117e-05	0.005	0.005	1
g21065.t1|DNJB9-PONAB	-0.0572037	0.508	0.496	1
g11446.t1	-0.00397157	0.032	0.032	1
g18299.t1|FBP1-STRPU	0.00165346	0.005	0.005	1
g23600.t1|PK1L1-ORYLA	0.000426978	0.01	0.01	1
g4765.t1|ARSB-RAT	-0.00627264	0.005	0.005	1
g20086.t1|EGL44-CAEEL	-1.41541e-05	0.002	0.002	1
g32988.t1|PNCB-DROME	-0.00677032	0.038	0.038	1
g7149.t1|MFSD6-PIG	0.00125305	0.003	0.003	1
g1834.t1|DNJA1-PONAB	-0.00395674	0.905	0.888	1
g19404.t1|KIF14-HUMAN	0.00359135	0.075	0.075	1
g8051.t1|S2611-BOVIN	0.00346828	0.004	0.004	1
g7203.t1|CABC2-BACT4	0.0729382	0.111	0.115	1
g31085.t1	0.00145008	0.009	0.009	1
g33606.t1|INX3-DROME	6.55473e-05	0.004	0.004	1

## Sheet: SC.12
ID	LogFC	Percent Positive, Head Cells	Percent Positive, Foot Cells	Adjusted P-value
g2198.t1|K1958-HUMAN	-1.74497	0.005	0.478	0
g2771.t1|APCD1-CHICK	-1.90706	0.097	0.679	0
g9819.t1|CSL3-ONCKE	-4.51345	0.031	0.6	0
g16882.t1	-2.58187	0.011	0.446	1.61014e-293
g4917.t1|TLD-DROME	-0.942749	0.008	0.43	7.41553e-287
g9565.t1|DNMT1-PARLI	-2.17284	0.09	0.57	1.23911e-270
g27079.t1	-2.08838	0.005	0.384	5.49111e-259
g1771.t1|TENA-DROME	-2.35285	0.003	0.367	3.9066e-250
g33747.t1|TENX-HUMAN	-2.11464	0.004	0.349	4.22347e-232
g21027.t1|SFRP3-MOUSE	-1.23997	0.006	0.321	9.64435e-206
g15630.t1|KCP4-PINMG	-1.59152	0.002	0.304	2.44605e-204
g3002.t1|DHE3-RAT	1.00555	0.906	0.67	3.08106e-195
g10349.t1	-1.68405	0.015	0.328	1.55738e-192
g18717.t1	-1.13374	0.005	0.282	6.34683e-180
g6567.t1|GLT13-RAT	-1.13865	0.011	0.275	1.01516e-161
g3710.t2|ANTA-HYDVU	-1.31505	0.053	0.372	2.12516e-157
g32158.t1|LOX5-MESAU	-1.201	0.075	0.403	1.29625e-151
g28682.t1|CALM-METSE	1.22688	0.763	0.407	6.67842e-151
g29750.t1|WNT2B-CHICK	1.58866	0.442	0.008	9.57078e-145
g248.t1	-1.23626	0.145	0.5	5.50141e-141
g10680.t1|KCP4-PINMG	-1.43203	0.171	0.532	2.2425e-139
g23421.t1|IABF-STRAW	-0.686861	0.011	0.244	1.29382e-135
g3660.t1	-1.81888	0.349	0.664	1.81169e-135
g6131.t1|CP17A-ICTPU	-0.957656	0.117	0.448	1.58379e-134
g7621.t1|CATL-DROME	0.672881	0.976	0.884	5.12532e-129
g3709.t1	-2.60536	0.365	0.63	5.2167e-124
g6067.t1	-1.09993	0.052	0.322	8.26183e-123
g13938.t1	-0.790403	0.016	0.237	5.27061e-122
g33458.t1|ENPP4-XENTR	-0.712562	0.071	0.361	5.84995e-118
g726.t1	-0.752349	0.002	0.184	5.28051e-116
g14519.t1	1.42569	0.466	0.097	3.59697e-111
g28449.t1|FD4-DROME	-0.540491	0.027	0.252	8.37244e-111
g5455.t1	-0.484995	0.024	0.238	1.00016e-106
g712.t1	-0.580101	0	0.158	7.46046e-103
g24036.t1	-1.02286	0.042	0.275	2.18469e-102
g13250.t1|AHV-ACTSK	-0.677375	0.138	0.428	3.59136e-97
g11696.t1|TPM1-HYDVU	1.60121	0.418	0.082	2.84511e-96
g24191.t1|FA5-BOVIN	0.875905	0.366	0.035	3.81296e-96
g3704.t1|FRIS-LYMST	0.540705	0.99	0.962	1.91391e-95
g8233.t1|USPAL-ARATH	-0.413347	0.001	0.152	5.26485e-95
g21993.t1|MYS-ARGIR	1.3833	0.559	0.247	1.15621e-93
g21994.t1|MYS-ARGIR	1.42587	0.559	0.254	1.30233e-93
g33401.t1	-0.625206	0.078	0.325	6.47594e-93
g26351.t2|CPO-DROME	0.933974	0.365	0.042	1.36497e-92
g22114.t1	-0.813302	0.671	0.862	4.27171e-91
g8637.t1	1.16418	0.502	0.174	4.94828e-88
g15636.t1|FRIS-LYMST	0.759748	0.99	0.974	3.12712e-87
g18565.t1|Y284L-PBCV1	1.01001	0.5	0.172	5.92101e-85
g21995.t1|MYS-PODCA	1.31927	0.523	0.215	9.69264e-84
g24168.t1|RTJK-DROFU	0.746463	0.306	0.017	3.55198e-82
g30822.t1|FBN1-MOUSE	1.12707	0.527	0.221	4.67998e-82
g22112.t1|B3GT6-MOUSE	-0.584832	0.085	0.323	5.773e-82
g31462.t1|ACT-HYDVU	0.465459	0.997	0.957	5.28055e-80
g11330.t1|AHV-ACTSK	-0.666737	0.331	0.626	3.37627e-79
g728.t1	-0.402313	0	0.123	4.65275e-78
g28262.t1|WNT5A-HUMAN	0.869682	0.335	0.044	1.17275e-77
g33661.t1|CPEB1-PONAB	-0.730129	0.629	0.796	4.13837e-77
g3763.t1|DD3-DICDI	1.23571	0.287	0.014	4.60342e-77
g1591.t1|ROR1-HUMAN	0.888835	0.38	0.086	5.4853e-76
g28992.t1|EGL4-CAEEL	0.886705	0.423	0.128	1.2596e-75
g33430.t1|MRLCA-RAT	0.420077	0.975	0.935	1.1223e-74
g25199.t1	-0.665663	0.066	0.273	2.71561e-74
g17314.t1|AGUA-STRAW	1.06243	0.389	0.1	9.96714e-74
g296.t1|ESRP1-RAT	-0.733183	0.088	0.304	1.89853e-73
g4273.t1	0.594404	0.262	0.005	7.79063e-73
g3662.t1	-0.871519	0.147	0.39	9.41949e-73
g3847.t1|DMTA2-XENTR	0.64451	0.414	0.109	1.02183e-72
g9840.t1|CO6A3-CHICK	-0.826129	0.074	0.29	1.20373e-72
g18277.t1|GAPR1-HUMAN	2.01324	0.306	0.042	7.31479e-71
g31235.t1|TPM1-PODCA	0.456371	0.967	0.943	1.24912e-69
g24773.t1|RL4A-ARATH	-0.264739	0.995	1	1.81187e-69
g12471.t1	0.827842	0.513	0.213	1.46203e-68
g30865.t1|PXDN-DROME	0.604226	0.371	0.087	1.84171e-68
g27630.t1|THIO-PLAF7	0.552098	0.951	0.933	4.32514e-68
g8328.t1|RADIL-DANRE	0.977578	0.583	0.329	4.77705e-67
g1279.t1	1.05754	0.384	0.11	1.06891e-66
g28515.t1|CATL-SARPE	0.740819	0.831	0.496	1.68738e-66
g11275.t1|TYB4-RAT	0.378341	0.967	0.695	6.3819e-66
g19781.t1	-0.481122	0.101	0.322	1.511e-65
g19664.t1	0.840035	0.505	0.218	5.66657e-65
g27778.t1|LAMC-DROME	1.69776	0.278	0.03	7.60746e-65
g33315.t1|ZN474-HUMAN	-0.782737	0.191	0.416	2.61457e-64
g10986.t1	-0.625599	0.499	0.724	3.18537e-64
g24851.t1|DD3-DICDI	1.25555	0.339	0.081	4.10058e-64
g710.t1|RTXE-DROME	-0.299609	0.001	0.104	6.31033e-63
g2700.t1|AT1A-HYDVU	0.849115	0.452	0.185	2.58281e-62
g26642.t1|FBN2-MOUSE	1.14732	0.518	0.274	2.83388e-62
g18245.t1|DLLH-BRAFL	-0.381232	0.025	0.17	1.58841e-61
g18779.t1|NPY4R-MOUSE	-0.409123	0.016	0.148	2.63222e-61
g18297.t1|BLC-VIBCH	0.758259	0.382	0.12	6.7721e-61
g24241.t1|EMAL4-XENTR	1.20745	0.266	0.03	5.74811e-60
g17392.t1|SAXO1-MACFA	1.1348	0.255	0.024	7.7087e-60
g19261.t1|SOX14-MOUSE	0.678686	0.334	0.087	2.48491e-58
g1302.t1	0.965111	0.525	0.277	2.63459e-58
g3699.t1	1.18055	0.263	0.035	9.88246e-58
g16165.t1|ZIC4-MOUSE	0.42501	0.232	0.012	1.39203e-57
g11062.t1|GAPR1-HUMAN	0.95829	0.233	0.015	3.05525e-57
g8869.t1	0.470942	0.249	0.024	5.88461e-57
g20991.t1|GST-NOTSL	0.540461	0.242	0.021	1.0727e-56
g28064.t1|WNT3-MOUSE	0.793345	0.22	0.008	1.23862e-56
g15181.t1|PLPP3-BOVIN	-0.473698	0.072	0.255	2.43031e-56
g234.t1|CALM-SCHPO	1.44694	0.44	0.206	3.27031e-56
g4828.t1|OAT-HUMAN	0.636174	0.292	0.057	1.25624e-55
g2330.t1|SVIL-MOUSE	0.607762	0.447	0.189	3.28244e-55
g23588.t1|TRAF4-MOUSE	0.874835	0.211	0.007	3.66336e-54
g7252.t1|LTBP4-HUMAN	0.737233	0.443	0.188	7.93581e-54
g11543.t1|MYPH-ECHGR	-0.650411	0.34	0.598	2.38132e-53
g26334.t1|KTN1-VULVU	-0.428015	0.876	0.916	1.81131e-52
g11056.t1	-0.527206	0.419	0.7	6.26739e-52
g33271.t1	0.506914	0.46	0.195	1.57601e-50
g4083.t1|GGHA-DICDI	0.586579	0.325	0.093	2.45266e-50
g25302.t1|NID2-MOUSE	0.836516	0.414	0.176	7.15423e-50
g20996.t1	0.902045	0.219	0.019	8.93217e-50
g21219.t1|MYPT1-CHICK	-0.884419	0.147	0.345	2.45189e-49
g2621.t1|RSH4A-MOUSE	0.572787	0.458	0.211	1.01605e-48
g556.t1	0.545004	0.282	0.063	1.63126e-48
g25564.t1	0.564828	0.299	0.074	2.61567e-48
g10616.t1|ARHGH-MOUSE	0.650951	0.458	0.227	3.49234e-48
g433.t1|SHAN1-RAT	-0.516435	0.174	0.391	3.62382e-48
g26645.t3|FBN3-HUMAN	0.570077	0.368	0.129	5.19444e-48
g6282.t1	0.834813	0.397	0.17	3.24713e-47
g27221.t1	0.783313	0.24	0.039	1.05239e-46
g24114.t1|OTX2-XENTR	0.384602	0.268	0.054	1.98539e-46
g21983.t1|GDIR1-RAT	0.339354	0.894	0.796	5.42282e-46
g19572.t1|CATZ-RAT	0.466083	0.756	0.565	6.60393e-46
g12478.t1|GAPR1-MOUSE	-0.352637	0.009	0.105	7.97964e-46
g26653.t1	0.585212	0.334	0.104	9.15044e-46
g29418.t1|CRIP1-RAT	0.416871	0.313	0.091	1.28103e-45
g31517.t1|HMCN1-HUMAN	0.619001	0.3	0.087	6.15903e-45
g15603.t1|RDH11-MOUSE	0.507493	0.429	0.188	1.1024e-44
g24483.t1|DCC-MOUSE	0.806815	0.24	0.045	1.62691e-44
g30252.t1	0.697963	0.19	0.012	2.57016e-44
g13470.t1|MLC2-DROME	0.35017	0.935	0.831	3.31056e-44
g24271.t1|TBA1-PARLI	1.41703	0.431	0.226	7.42055e-44
g27334.t1|GLNA-PANAR	1.20888	0.219	0.033	1.9281e-43
g31616.t1	-0.484052	0.074	0.236	4.09977e-43
g17994.t1|TBA-XENLA	-1.49537	0.548	0.628	6.89318e-42
g10458.t1|DOPR4-CAEEL	-0.239092	0.014	0.112	9.42599e-42
g27363.t1|ODP2-HUMAN	0.576401	0.634	0.43	1.21729e-41
g18321.t1	-0.400191	0.392	0.64	1.50753e-41
g31345.t1|RISC-HUMAN	0.472337	0.502	0.271	3.03231e-41
g16770.t1|RS6-BRAFL	-0.189755	0.996	0.999	3.80452e-41
g4015.t1	0.466354	0.292	0.086	1.20871e-40
g8768.t1|HXA9B-TAKRU	0.443008	0.253	0.059	1.64835e-40
g2115.t1|CFA43-HUMAN	-0.502029	0.055	0.194	2.01829e-40
g2914.t1|RALA-HUMAN	0.401336	0.747	0.573	2.40656e-40
g4323.t1	-0.285549	0.032	0.151	3.59169e-40
g9994.t1|RS11-MAGSA	0.517638	0.265	0.069	3.84557e-40
g24147.t1	0.402892	0.251	0.059	1.95979e-39
g23926.t1|PDIA5-MOUSE	-0.669271	0.367	0.533	8.39549e-39
g6418.t1|TGMH-TACTR	0.703274	0.215	0.039	8.69173e-39
g33750.t1	-0.291591	0	0.065	1.13477e-38
g31590.t1|MYSU-RABIT	0.521855	0.527	0.298	1.45895e-38
g29638.t2|TENA-CHICK	0.395435	0.241	0.056	3.40564e-38
g14802.t1	0.527413	0.37	0.152	7.49333e-38
g18417.t1|YCP8-SCHPO	-0.463147	0.238	0.43	1.78014e-37
g12355.t1	0.60751	0.36	0.157	2.0071e-37
g19568.t1	-0.346505	0.204	0.421	1.61883e-36
g17237.t1|B3GN6-MOUSE	0.341941	0.224	0.047	1.95412e-36
g17831.t1|GELS2-LUMTE	-0.260242	0.982	0.983	1.99557e-36
g33477.t1|MYPH-ECHGR	-0.41693	0.536	0.704	2.14292e-36
g4074.t1|EF1G-RABIT	-0.263204	0.931	0.971	3.0528e-36
g10325.t1	0.35503	0.852	0.749	4.17309e-36
g1680.t1|AT5G2-RAT	0.187552	0.994	0.988	6.2881e-36
g21873.t1|FRIS-LYMST	0.780593	0.83	0.752	1.12232e-35
g203.t1|AMT1-CAEEL	0.445763	0.348	0.145	2.22866e-35
g29389.t1|CAS4-EPHMU	0.295281	0.172	0.018	3.57606e-35
g32193.t1	-0.976049	0.297	0.454	3.89649e-35
g18385.t1|GRDN-HUMAN	1.01342	0.252	0.076	4.69754e-35
g8887.t1	0.37945	0.256	0.073	4.81111e-35
g25320.t3|SEPT7-RAT	0.448706	0.661	0.471	5.40671e-35
g5843.t1|TXNIP-RAT	0.587896	0.206	0.039	6.79443e-35
g210.t1	0.459597	0.178	0.023	1.22193e-34
g13693.t1	1.20327	0.343	0.171	2.80931e-34
g23657.t1|SPRE-BOVIN	0.441367	0.322	0.123	3.83035e-34
g2028.t1	0.365962	0.266	0.081	9.18612e-34
g11394.t1|B3GN4-HUMAN	-0.74277	0.237	0.391	2.68099e-33
g33422.t1|SP4-MOUSE	0.51786	0.406	0.207	2.77611e-33
g10034.t1|CEL2A-PIG	-1.00295	0.234	0.386	3.34961e-33
g29454.t1|Y1101-SYNY3	0.29971	0.793	0.618	9.06067e-33
g27082.t1|RIMB2-MOUSE	0.52277	0.228	0.061	1.47426e-32
g26840.t1|ZN703-XENTR	0.338951	0.165	0.019	2.92987e-32
g30442.t1	0.492628	0.26	0.086	3.398e-32
g12470.t1	0.398781	0.354	0.151	7.27168e-32
g6354.t2|UAP1-MOUSE	-0.463367	0.409	0.574	8.02011e-32
g10324.t2|MYPT2-HUMAN	0.351909	0.746	0.578	8.13626e-32
g21411.t1|SYT12-HUMAN	-0.333441	0.071	0.204	8.60301e-32
g11697.t1|NAS4-CAEEL	-0.375287	0.27	0.463	8.8915e-32
g9524.t1|HEXA-PONAB	0.406164	0.655	0.477	1.07215e-31
g23434.t1|S2611-HUMAN	0.26715	0.164	0.019	1.20773e-31
g7828.t1|CD63-HUMAN	0.323291	0.893	0.856	2.40837e-31
g32147.t1	-0.629488	0.176	0.332	3.42394e-31
g13419.t1	0.341977	0.135	0.005	6.60915e-31
g24596.t1|GLRX-RICCO	0.295501	0.825	0.693	7.25356e-31
g30816.t1	0.388299	0.27	0.093	9.35666e-31
g16790.t1|RS17-COTJA	-0.177598	0.989	0.999	1.04238e-30
g20941.t1|LTBP4-MOUSE	0.239576	0.128	0.003	1.05036e-30
g33749.t1|TEN1-CAEEL	-0.228911	0.008	0.078	1.54186e-30
g13655.t1|LOXH1-HUMAN	0.571025	0.224	0.065	1.62227e-30
g20918.t1|OPSL-LIMPO	-0.32408	0.029	0.127	1.72663e-30
g19253.t1|CALB2-RAT	0.559961	0.161	0.02	1.86794e-30
g258.t1|IF2-DESHY	0.397877	0.586	0.408	3.53969e-30
g18384.t1	0.671409	0.185	0.036	4.13151e-30
g29888.t1|FLOT2-DROME	0.322299	0.874	0.795	6.85759e-30
g13218.t2|UMPS-TOBAC	0.480767	0.182	0.035	7.395e-30
g30709.t1|GILT-BOVIN	0.899478	0.421	0.235	8.75066e-30
g32997.t1|EF1A-HYDVU	-0.17201	1	1	1.298e-29
g31502.t1	-0.742029	0.403	0.53	1.8879e-29
g16428.t2|KAP2-BOVIN	-0.577429	0.153	0.297	2.55525e-29
g8868.t1|DAAA-BACLI	0.396524	0.218	0.06	4.31624e-29
g20410.t1|KCA10-CHICK	0.308112	0.131	0.007	4.61652e-29
g24582.t1	-0.878438	0.69	0.78	6.8945e-29
g20911.t1|GATA2-XENLA	-0.192177	0.017	0.098	8.2098e-29
g2417.t1|CML16-ARATH	-0.362197	0.477	0.63	1.47479e-28
g5735.t1|RHG06-MOUSE	0.434394	0.235	0.074	1.94352e-28
g3368.t1	0.371025	0.256	0.089	2.04892e-28
g14184.t1|PCDL-ACRMI	0.358061	0.238	0.076	3.49446e-28
g8325.t1|RL10-DROME	-0.160601	0.993	0.996	4.20137e-28
g14028.t1|TM104-CHICK	0.352052	0.352	0.172	4.78115e-28
g12724.t1|MYSN-DROME	0.254539	0.949	0.812	5.1685e-28
g31427.t1	0.359926	0.453	0.265	5.34349e-28
g19513.t1|RS8-SPOFR	-0.188532	0.979	0.993	6.20679e-28
g20121.t1|TCTP-HYDVU	-0.166107	0.997	0.996	6.98687e-28
g4598.t1|GNMT-RAT	0.353187	0.316	0.138	1.1223e-27
g27595.t1	0.376902	0.165	0.029	1.16062e-27
g26748.t1	0.364994	0.429	0.232	1.19803e-27
g24952.t1|BRAC-HUMAN	0.524251	0.144	0.017	1.38184e-27
g29448.t1|MYPH-ECHGR	0.458197	0.753	0.57	1.81568e-27
g17060.t1|UBE3C-MOUSE	0.374861	0.637	0.477	2.23851e-27
g15841.t1|EF2-CHICK	-0.220316	0.971	0.977	2.66226e-27
g6320.t1|AT1A-HYDVU	0.370392	0.4	0.221	4.38559e-27
g32490.t1	0.315687	0.164	0.029	4.95351e-27
g24542.t1|RGF1C-MACFA	-0.523498	0.281	0.43	7.75194e-27
g12274.t1|FRIZ2-CAEEL	-0.581055	0.088	0.215	1.39246e-26
g8587.t1	0.288597	0.118	0.004	1.87271e-26
g20870.t1	0.351243	0.225	0.073	4.27832e-26
g16771.t1	0.255529	0.161	0.029	4.34035e-26
g23429.t1|RSGI5-CLOTH	-0.187915	0.003	0.056	5.10547e-26
g12464.t1|TNKS-DROME	0.239577	0.142	0.019	8.11009e-26
g12775.t1|RS12-PIG	-0.168432	0.988	0.997	1.36107e-25
g22533.t1|TBA1C-HUMAN	0.480646	0.136	0.016	1.55645e-25
g33531.t1|PROF-HELCR	0.17606	0.995	0.98	1.79043e-25
g20012.t1	0.215235	0.134	0.015	1.9237e-25
g28232.t1	-0.437927	0.463	0.634	2.16479e-25
g1306.t1	0.5243	0.437	0.267	2.25635e-25
g26654.t1|SYPL1-MOUSE	0.301993	0.233	0.077	2.69005e-25
g1276.t1|HMCN1-HUMAN	0.315736	0.145	0.022	3.5833e-25
g4003.t1|PTPR2-RAT	-0.597505	0.409	0.545	5.1685e-25
g82.t1|NAS28-CAEEL	0.230422	0.118	0.007	5.67155e-25
g14685.t1|SPY2-BOVIN	-0.8788	0.302	0.436	6.64358e-25
g24329.t1|LWA-HYDEC	-1.18015	0.168	0.313	7.96202e-25
g2616.t1|Y381-RICFE	0.243314	0.172	0.038	8.8155e-25
g13548.t1|AT1B1-CHICK	0.347895	0.313	0.149	1.22681e-24
g13932.t1	0.336467	0.109	0.004	1.40698e-24
g22220.t1	0.360661	0.155	0.03	1.99005e-24
g9118.t1	-0.192343	0.021	0.1	2.67516e-24
g25018.t1|PDCD4-CHICK	-0.379478	0.388	0.547	3.48629e-24
g25556.t1|A30BL-HUMAN	0.162561	0.115	0.007	3.68345e-24
g14055.t1	0.318221	0.162	0.035	4.94038e-24
g30386.t1|VENT1-XENTR	0.184634	0.104	0.002	5.08876e-24
g5840.t1	0.402191	0.562	0.391	5.29197e-24
g26563.t1|RAC1-RAT	0.231397	0.921	0.864	6.1162e-24
g32238.t1	-0.247008	0.08	0.203	8.79288e-24
g7738.t1	-1.11514	0.235	0.377	9.70213e-24
g11515.t1|HSP70-HYDVU	0.473333	0.423	0.248	9.8741e-24
g12732.t1|CAR11-MOUSE	-0.311141	0.2	0.363	1.18225e-23
g33457.t1	-0.190689	0.015	0.084	2.05831e-23
g20605.t1|RL17-PODCA	-0.168294	0.982	0.994	2.09273e-23
g27138.t1|NCF2-BOVIN	0.227469	0.128	0.015	2.16546e-23
g18444.t1|GGT1-RAT	0.493756	0.204	0.069	2.28701e-23
g11295.t1|G3ST1-HUMAN	0.263739	0.118	0.011	3.65458e-23
g5157.t1|AMPP1-ASPNC	-0.183003	0.033	0.12	4.05952e-23
g12853.t1|AT1A-HYDVU	0.26948	0.194	0.058	5.73572e-23
g1742.t1|OPN4-PHOSU	-0.0967696	0.009	0.067	5.86411e-23
g16066.t1|ANPRA-MOUSE	0.246545	0.104	0.004	6.15186e-23
g29159.t1|AFAD-HUMAN	0.406152	0.744	0.61	8.33494e-23
g15773.t2	0.745809	0.258	0.114	8.44154e-23
g12949.t1|GIMA7-HUMAN	0.347173	0.301	0.142	8.61471e-23
g28086.t1|RAA1C-ARATH	0.384837	0.569	0.431	2.08582e-22
g31005.t1	0.23384	0.115	0.011	5.06139e-22
g15468.t1|MPC2-PONAB	0.360024	0.342	0.18	5.49798e-22
g16030.t1|GRDP2-ARATH	0.260415	0.175	0.048	7.19212e-22
g4061.t1|PRY1-YEAST	0.252064	0.105	0.006	8.9738e-22
g10512.t1|AMT1-CAEEL	0.244514	0.216	0.075	1.11707e-21
g10121.t1|DRD2L-DROME	-0.126973	0.013	0.077	1.18528e-21
g17066.t1	0.233347	0.105	0.006	1.45871e-21
g28700.t1|MPRG-HUMAN	0.224492	0.139	0.026	1.47042e-21
g3626.t1	0.382653	0.226	0.088	1.78692e-21
g10485.t1	0.269183	0.312	0.151	2.05088e-21
g13247.t1|AHV-ACTSK	-0.191004	0.032	0.114	2.39415e-21
g24016.t1|GCSH-BARBK	0.30384	0.693	0.554	2.75697e-21
g10300.t1|B4GN4-HUMAN	0.200467	0.108	0.009	3.0567e-21
g29010.t1	0.222381	0.105	0.007	4.2005e-21
g32552.t1|SPD2A-DANRE	0.307145	0.159	0.04	5.38342e-21
g6753.t1|TBB4B-MOUSE	1.13803	0.392	0.255	5.41644e-21
g13421.t1	0.246049	0.209	0.073	7.94829e-21
g1889.t1|RL26-LITLI	-0.157508	0.988	0.992	8.68796e-21
g12768.t1|KGP1-HUMAN	0.312555	0.476	0.316	2.34774e-20
g21033.t1|FA65A-HUMAN	0.2042	0.133	0.025	2.38208e-20
g4222.t1|CASP3-MESAU	0.193705	0.133	0.025	3.07999e-20
g31685.t1|CFAD-DICDI	0.383644	0.801	0.649	4.06676e-20
g20802.t1|RLA2-CRYST	-0.135291	0.988	0.993	4.42321e-20
g24605.t1|DEN6A-CHICK	0.437041	0.657	0.542	4.67193e-20
g23859.t1|VILI-CHICK	0.222953	0.103	0.008	4.70321e-20
g33757.t1	0.247246	0.214	0.081	5.66656e-20
g11313.t1	-0.807688	0.238	0.373	9.1471e-20
g9693.t1|CAS4-EPHMU	0.198834	0.096	0.005	9.9325e-20
g745.t1	-0.61385	0.395	0.501	1.43354e-19
g29899.t1|CMK1-CAEBR	0.197021	0.139	0.03	1.56962e-19
g21780.t1|ACT-HYDVU	0.155681	1	0.996	1.91023e-19
g12884.t1|MANF-BOVIN	-0.256995	0.904	0.93	2.01873e-19
g24911.t1	-0.234645	0.064	0.164	2.0546e-19
g17363.t1|FAT4-MOUSE	0.257587	0.17	0.05	2.23604e-19
g245.t1|NDRG3-BOVIN	0.241509	0.258	0.112	2.44562e-19
g33421.t1|AKT3-HUMAN	0.33463	0.549	0.388	2.61661e-19
g21316.t1	0.196212	0.098	0.007	3.33874e-19
g24771.t1|KAPCA-HUMAN	-0.68433	0.498	0.578	3.37173e-19
g20686.t1	0.27376	0.248	0.106	4.24427e-19
g2714.t1	-0.254837	0.038	0.12	4.50838e-19
g2834.t2|GXCDD-DICDI	0.281302	0.255	0.115	5.46131e-19
g13996.t1|PRLD1-BOVIN	0.313069	0.514	0.36	5.46154e-19
g17998.t1|CRYAB-BOVIN	0.229019	0.951	0.922	6.13938e-19
g9879.t1|MTH2-DROYA	-0.0934519	0.012	0.069	6.15376e-19
g26272.t1|RS16-HETFO	-0.151941	0.985	0.991	7.3843e-19
g8295.t1|RL3-DROME	-0.163296	0.965	0.975	9.63729e-19
g33373.t1|WNT7B-HUMAN	0.965675	0.085	0.002	1.01549e-18
g371.t1|ST17A-RABIT	0.304022	0.717	0.596	1.08993e-18
g17572.t1	0.18211	0.092	0.005	1.13984e-18
g17298.t1|KAP1-MOUSE	-0.641905	0.396	0.493	1.39447e-18
g15894.t1|DUT-RHILW	0.321289	0.246	0.11	1.44314e-18
g14229.t1|GREM2-HUMAN	0.169721	0.133	0.027	1.52813e-18
g13058.t1|SODC-CAMDR	0.563128	0.374	0.221	1.94864e-18
g8639.t3|SRBS2-MOUSE	0.2858	0.265	0.121	2.02491e-18
g2489.t1|NHP6-CRYNJ	-0.479994	0.281	0.399	2.17812e-18
g26984.t1	-0.088482	0.004	0.047	2.73589e-18
g844.t1	-0.24724	0.018	0.081	2.74626e-18
g6327.t1	0.661584	0.095	0.008	2.80609e-18
g23011.t1|SPAT6-HUMAN	0.283361	0.193	0.071	5.40317e-18
g22280.t1|MOS1T-DROMA	0.17431	0.103	0.012	8.78573e-18
g32565.t1|ADDA-HUMAN	0.21645	0.255	0.118	9.36619e-18
g24239.t1|GAPR1-HUMAN	0.241137	0.085	0.004	1.25103e-17
g18534.t1|CGAT1-MOUSE	0.241879	0.267	0.124	1.46576e-17
g6750.t1|TBB-PARLI	-0.25348	0.951	0.978	1.51471e-17
g25376.t1|CATL-DROME	0.604139	0.632	0.453	2.0501e-17
g23416.t1|MCL1-FELCA	0.297477	0.596	0.449	3.24447e-17
g14938.t1|AXIN1-HUMAN	0.241047	0.209	0.084	3.66266e-17
g18449.t1|PHLB2-HUMAN	-0.560495	0.397	0.486	3.67474e-17
g33728.t1|AMPD2-HUMAN	0.0469874	0.339	0.529	4.88738e-17
g33686.t1	0.166577	0.134	0.032	5.63475e-17
g24664.t1|NOX3-HUMAN	-0.167932	0.027	0.095	6.1664e-17
g29540.t1|GGT1-RAT	0.423353	0.518	0.36	6.36935e-17
g12418.t1|DNJB4-PONAB	0.332599	0.8	0.724	6.46717e-17
g8319.t1|RL18-DROME	-0.133181	0.98	0.989	6.48113e-17
g2036.t1|RL27-HIPCM	-0.143962	0.987	0.99	8.03975e-17
g3486.t1|CHIT1-HUMAN	0.311228	0.408	0.256	1.13661e-16
g33220.t1|CSRP2-HUMAN	-0.31114	0.381	0.508	1.44439e-16
g15655.t1|FEZF2-BOVIN	0.151098	0.083	0.004	1.60393e-16
g19862.t1	-0.225105	0.054	0.141	1.65825e-16
g13657.t1|HMU-HALWD	0.173264	0.084	0.005	1.68678e-16
g24647.t1	0.234983	0.227	0.1	1.93576e-16
g17050.t1	-0.359954	0.217	0.339	2.25421e-16
g20465.t1|CSK21-MOUSE	0.353728	0.441	0.301	2.39987e-16
g5147.t1	0.194972	0.138	0.037	2.78272e-16
g6875.t1|VATG-MANSE	0.195806	0.901	0.834	2.82464e-16
g11299.t1|SOX4-MOUSE	-0.174367	0.029	0.097	3.1188e-16
g19454.t1|CALM5-ARATH	-0.18953	0.051	0.136	3.8198e-16
g27891.t1|FZD4-RAT	0.282472	0.278	0.143	4.39716e-16
g18519.t1|EFHD2-HUMAN	0.233135	0.819	0.729	6.16297e-16
g14850.t1	0.240329	0.188	0.072	6.88147e-16
g3489.t1|RFT2-SALSA	0.291041	0.303	0.168	7.65101e-16
g13547.t1|PRIC1-AEDAE	0.215876	0.209	0.088	7.70512e-16
g11745.t1|MYPT1-CHICK	0.370634	0.502	0.365	8.16277e-16
g27981.t1|MGA-HUMAN	0.238141	0.439	0.271	9.0987e-16
g28229.t1|PTGR1-BOVIN	0.258616	0.785	0.721	9.30964e-16
g22738.t1|FMO2-PONAB	0.313418	0.35	0.21	9.52881e-16
g625.t1|RS4-ICTPU	-0.145407	0.984	0.993	1.00356e-15
g33732.t1|TSN6-MOUSE	-0.275567	0.094	0.194	1.37805e-15
g1275.t1|PROP-HUMAN	0.193333	0.115	0.025	1.46859e-15
g2110.t1|RL23-DROME	-0.128768	0.983	0.99	1.93981e-15
g15219.t1|PCP-BOVIN	0.257228	0.332	0.194	2.24196e-15
g20432.t1	-0.413132	0.16	0.265	2.55406e-15
g11589.t1	-0.286348	0.17	0.284	2.56824e-15
g25169.t1|RL12-RAT	-0.152524	0.97	0.981	3.34309e-15
g12126.t1|RASLC-BOVIN	-0.129837	0.273	0.446	4.77164e-15
g10790.t1|MYLK-SHEEP	0.204527	0.22	0.097	4.80871e-15
g13529.t1	0.15026	0.081	0.006	5.25188e-15
g24119.t1|NEB1-RAT	0.245073	0.256	0.128	5.48427e-15
g20919.t1|RL9-ICTPU	-0.156766	0.975	0.981	5.63421e-15
g17348.t1|MOM5-CAEEL	-0.134648	0.037	0.11	5.9606e-15
g1132.t1	0.202572	0.158	0.054	6.16604e-15
g5995.t1|MKNK1-MOUSE	0.181992	0.13	0.035	6.4361e-15
g29473.t1|RHCG-CHICK	0.434894	0.19	0.079	7.66946e-15
g26902.t1|NOTUM-MOUSE	0.211334	0.101	0.018	8.62522e-15
g1973.t2|KI26A-MOUSE	0.330711	0.269	0.142	9.27334e-15
g25774.t1|IP6K1-RAT	0.285843	0.347	0.208	1.0708e-14
g29383.t1|OPSO-RUTRU	0.170201	0.107	0.021	1.09804e-14
g13220.t1|MYCBP-MOUSE	0.188452	0.111	0.024	1.21805e-14
g5786.t1|CHSS1-MOUSE	-0.394055	0.183	0.291	1.56814e-14
g23309.t1|MCU-DANRE	0.253862	0.614	0.483	1.61542e-14
g5411.t1	-0.38103	0.586	0.673	1.61546e-14
g16299.t1|ST1B1-MOUSE	0.229892	0.243	0.119	1.74617e-14
g29487.t1|ABR-BOVIN	0.28119	0.315	0.18	1.82025e-14
g19531.t1	1.70779	0.122	0.033	1.97861e-14
g8337.t1|GILT-HUMAN	0.419471	0.134	0.042	2.02769e-14
g5013.t1|F221A-RAT	0.175924	0.116	0.027	2.08901e-14
g10040.t1|CELR1-HUMAN	0.145936	0.073	0.004	2.0965e-14
g5224.t1|ADRB2-BOVIN	0.154996	0.077	0.005	2.14929e-14
g11020.t1|ARC1A-RAT	0.19147	0.874	0.799	3.24091e-14
g27119.t1	1.09523	0.45	0.354	3.26719e-14
g28842.t1|RL30-BRABE	-0.152841	0.975	0.981	3.62064e-14
g22300.t2|RASLC-DANRE	0.12619	0.072	0.004	3.67761e-14
g33754.t1|Y1388-SYNY3	0.319741	0.617	0.518	3.78303e-14
g12567.t1|SOX2-CHICK	0.25858	0.091	0.013	3.83302e-14
g24891.t1|TLCD2-DANRE	0.234022	0.27	0.143	4.59021e-14
g8915.t1	0.166649	0.149	0.05	4.61185e-14
g6403.t1	0.130636	0.07	0.003	4.83926e-14
g5178.t1|RAD50-PLAF7	0.170312	0.093	0.015	5.50576e-14
g12120.t1|MMP7-RAT	-0.221823	0.049	0.126	6.22086e-14
g16569.t1|SNRK-HUMAN	0.229042	0.193	0.082	6.36127e-14
g17442.t1	0.287258	0.143	0.048	6.52517e-14
g12466.t1|LMIP-RAT	0.51645	0.143	0.048	7.24935e-14
g28786.t1|RB22A-MOUSE	0.27294	0.494	0.36	1.09793e-13
g20783.t1	-0.176907	0.034	0.101	1.10501e-13
g13857.t1|PKD2-ORYLA	0.17346	0.116	0.029	1.15079e-13
g4303.t1|ARHGG-HUMAN	0.25086	0.34	0.204	1.34217e-13
g23100.t1|ASPP-AEDAE	0.294289	0.711	0.585	1.34779e-13
g4556.t1|EEA1-MOUSE	0.170945	0.922	0.89	1.39425e-13
g9739.t1|NAGAB-HUMAN	0.269191	0.403	0.261	1.75198e-13
g28847.t1|TBA3-RAT	0.229944	0.813	0.725	1.78512e-13
g15462.t1|CYTA-MOUSE	0.152928	0.077	0.007	2.00681e-13
g30117.t2|SPTCS-HUMAN	0.255832	0.408	0.275	2.12204e-13
g4541.t1|CAR11-ARATH	0.267889	0.379	0.247	2.21159e-13
g19401.t1|NUCB2-RAT	-0.25595	0.78	0.822	2.31816e-13
g6256.t1	-0.195964	0.021	0.076	3.99495e-13
g11575.t2|CHDH-MOUSE	-0.140335	0.051	0.128	4.05309e-13
g2274.t1	-0.220448	0.038	0.105	4.98497e-13
g5308.t1|MYO7A-MOUSE	0.11267	0.106	0.024	5.27791e-13
g17216.t1|VIPA-SALTI	0.224741	0.289	0.159	5.28819e-13
g18475.t1|FORF-DICDI	0.128995	0.08	0.01	5.35191e-13
g4715.t1	-0.337425	0.595	0.677	6.66842e-13
g13939.t1|MGST3-MOUSE	0.240613	0.515	0.369	1.00915e-12
g31954.t1|NKX25-XENLA	-0.0669947	0.001	0.027	1.03472e-12
g25855.t1|PIGL-HUMAN	0.188572	0.196	0.088	1.04436e-12
g24409.t1|F16P1-RABIT	0.26241	0.618	0.492	1.05732e-12
g4298.t1	-0.159286	0.962	0.969	1.3617e-12
g3893.t1|ASPGB-ARATH	-0.543172	0.201	0.304	1.41747e-12
g27219.t1|SMTN-HUMAN	0.244787	0.145	0.052	1.45526e-12
g12059.t1|RL15-NEUCR	-0.158039	0.964	0.978	1.80945e-12
g7938.t1|MOT14-HUMAN	0.433117	0.096	0.021	1.86619e-12
g23270.t1|FSHR-CAIMO	0.149153	0.085	0.013	2.11873e-12
g5301.t1|FLNA-DROME	0.103784	0.081	0.012	2.48142e-12
g33251.t1|PRB1-ARATH	0.163491	0.111	0.029	3.07215e-12
g1844.t1|RL13-DANRE	-0.128417	0.973	0.979	3.15023e-12
g30406.t1	0.128093	0.103	0.024	3.42487e-12
g31719.t1	1.32692	0.139	0.052	3.5291e-12
g33708.t1	0.169354	0.113	0.031	4.49905e-12
g12223.t1|MYLIP-RAT	0.329125	0.412	0.295	5.89308e-12
g16517.t1|CAN5-MOUSE	0.289633	0.497	0.38	6.99875e-12
g5309.t1|MYO7A-HUMAN	0.140418	0.111	0.03	7.10501e-12
g14048.t1|DAPK2-HUMAN	0.185443	0.31	0.175	7.41732e-12
g22934.t1	0.58917	0.271	0.161	7.72851e-12
g19012.t1|YQK1-SCHPO	-0.33529	0.31	0.424	7.7794e-12
g12044.t1	0.129083	0.102	0.024	8.38645e-12
g18011.t1|RAS3-DROME	0.285012	0.345	0.223	8.51862e-12
g31949.t1	0.20347	0.137	0.048	8.94821e-12
g2189.t1	-0.133179	0.014	0.059	9.45864e-12
g10742.t1	-0.280513	0.147	0.244	1.04828e-11
g24221.t1|MESH-DROME	0.13114	0.088	0.017	1.34384e-11
g13720.t1	-0.172465	0.031	0.09	1.37697e-11
g33328.t1	-0.491878	0.082	0.163	1.45231e-11
g6807.t1	-0.218267	0.067	0.145	1.45244e-11
g10961.t1|GAPR1-MOUSE	-0.0624291	0.003	0.032	1.48745e-11
g5882.t1|SAL-SILAS	-0.562714	0.356	0.447	1.61598e-11
g24855.t1|RHO1-DROME	0.148903	0.955	0.927	1.64102e-11
g20349.t1|Y2028-MYCBO	0.282949	0.609	0.492	1.99933e-11
g27863.t1|OX2R-PIG	-0.0721645	0.007	0.043	2.07136e-11
g21120.t2|RB6I2-MOUSE	0.245059	0.438	0.306	2.23734e-11
g13698.t1|OPN4A-GADMO	-0.113125	0.076	0.162	2.33442e-11
g24146.t1|THSD1-HUMAN	0.0946493	0.064	0.004	2.71064e-11
g29926.t1|GRN-HUMAN	0.231933	0.672	0.516	2.76844e-11
g87.t1|GFPT2-RAT	0.602216	0.498	0.43	3.0743e-11
g16698.t1|BRAC-CHICK	0.240223	0.067	0.006	3.26489e-11
g25100.t1|CCNI-MOUSE	0.373315	0.405	0.291	3.68438e-11
g16431.t1|ATS9-HUMAN	0.135398	0.072	0.009	3.73744e-11
g16436.t1|SYQ-BOVIN	0.232392	0.536	0.408	3.90445e-11
g18551.t1	0.124835	0.068	0.007	4.34145e-11
g15364.t1|YVC1-YEAST	0.0977614	0.055	0.001	4.75835e-11
g13418.t1|RS27A-DROME	-0.148633	0.968	0.981	4.82264e-11
g4475.t1	0.503498	0.498	0.415	4.90907e-11
g14753.t1|SPTCA-DROME	0.22628	0.311	0.188	4.99704e-11
g15345.t1|CTL4-XENLA	-0.36361	0.214	0.31	5.02749e-11
g2012.t1	0.283022	0.4	0.279	5.06384e-11
g13212.t1|TLL2-HUMAN	0.362513	0.246	0.14	5.22847e-11
g14054.t1	0.111511	0.073	0.01	5.41385e-11
g3553.t1|PHNX-SYNFM	0.769453	0.36	0.261	5.81179e-11
g11573.t1|CHDH-RAT	-0.208248	0.116	0.21	5.86524e-11
g8466.t1	-0.342313	0.316	0.424	6.13667e-11
g7524.t1|CERS6-HUMAN	0.165766	0.216	0.109	8.34162e-11
g10536.t1|MITF-MOUSE	0.218315	0.366	0.24	8.35997e-11
g6940.t1|ERAP2-BOVIN	0.108112	0.06	0.004	8.70105e-11
g4159.t1	0.181191	0.156	0.065	9.22713e-11
g3156.t1|UBE2H-MOUSE	0.317082	0.56	0.441	9.31081e-11
g17979.t1|CRYAB-BOVIN	0.236349	0.704	0.604	1.11257e-10
g17466.t1|RL11-DROME	-0.16527	0.957	0.965	1.18309e-10
g26950.t1|LCTA-LATTR	0.195004	0.241	0.13	1.204e-10
g27211.t1|GIT2-HUMAN	0.291284	0.238	0.131	1.27261e-10
g12999.t1|CALM-METSE	0.152799	0.929	0.88	1.47861e-10
g21570.t1|USF2-HUMAN	0.204002	0.615	0.5	1.50931e-10
g33087.t1|AGRIN-HUMAN	-0.124899	0.019	0.067	1.68165e-10
g2830.t1|WHITE-DROME	0.215816	0.22	0.114	1.81605e-10
g11366.t1|CBS-HUMAN	0.300209	0.339	0.221	2.06628e-10
g16673.t1	0.248013	0.481	0.365	2.0876e-10
g22677.t2|CNTN4-RAT	0.183796	0.272	0.159	2.44262e-10
g33286.t1|ARP19-XENTR	0.266585	0.55	0.434	2.46994e-10
g30409.t1|CASR-RAT	-0.0831664	0.012	0.052	2.50618e-10
g28374.t1	0.239608	0.318	0.199	2.63717e-10
g9643.t1|MPPB-BOVIN	0.17624	0.764	0.678	5.03414e-10
g9689.t1|ISCU-MOUSE	0.215431	0.695	0.587	5.52741e-10
g5933.t1|PH4H-DROME	0.105404	0.077	0.014	5.78567e-10
g19036.t1|RS15A-RAT	-0.14482	0.943	0.966	7.06114e-10
g1136.t1|RDH11-HUMAN	0.225521	0.487	0.367	7.18533e-10
g2196.t1|RS18-BRABE	-0.111076	0.986	0.991	7.21144e-10
g22081.t1	0.219914	0.154	0.067	8.03491e-10
g11287.t2|DCX-MOUSE	-0.07784	0.006	0.039	9.83888e-10
g30276.t1|WDR1A-XENLA	0.213988	0.625	0.515	9.85106e-10
g4330.t1|CROCC-MOUSE	0.242489	0.222	0.121	1.02065e-09
g11175.t1	0.166537	0.227	0.123	1.07551e-09
g11658.t1|GLC7B-CAEEL	0.214276	0.501	0.386	1.09256e-09
g21529.t1|CDC42-CAEEL	0.176594	0.893	0.851	1.10357e-09
g2192.t1|LMX1A-HUMAN	-0.111371	0.029	0.083	1.1215e-09
g28950.t1	0.229267	0.572	0.474	1.13292e-09
g22130.t1	0.0908891	0.058	0.004	1.15074e-09
g19961.t1|RLA1-DROME	-0.116205	0.972	0.984	1.44458e-09
g29837.t1	-0.365066	0.251	0.343	1.62494e-09
g23152.t1	0.166327	0.174	0.082	1.65887e-09
g12885.t1|HEM0-MOUSE	-0.345535	0.294	0.381	1.68307e-09
g6526.t1|SRC2-XENLA	-0.169677	0.03	0.083	1.89129e-09
g28899.t1|COASY-HUMAN	0.202554	0.4	0.278	1.89947e-09
g6539.t1|NEK10-MOUSE	-0.144806	0.057	0.123	1.99833e-09
g14402.t1|S2536-DANRE	0.180721	0.123	0.045	2.2433e-09
g4679.t1|RIMK-SYNPX	0.159346	0.239	0.133	2.81219e-09
g24321.t1|KAD2-DANRE	0.142626	0.85	0.806	2.92429e-09
g17202.t1|TRAF5-MOUSE	0.302048	0.442	0.317	3.24921e-09
g25167.t1|NHRF1-RAT	-0.417666	0.562	0.61	3.34344e-09
g24681.t1|CNDP2-HUMAN	-0.308861	0.453	0.531	3.36357e-09
g29161.t1|NANO1-DANRE	0.177685	0.071	0.012	3.52081e-09
g555.t1	0.0948399	0.076	0.015	3.58494e-09
g21591.t1|CAPZB-RAT	0.214546	0.589	0.477	3.8257e-09
g12777.t1|MTUS1-MOUSE	0.256778	0.473	0.362	3.97726e-09
g16547.t1|RL8-XENTR	-0.131719	0.959	0.979	4.02527e-09
g26461.t1|SYNG1-MACFA	0.0991738	0.067	0.011	4.14279e-09
g25893.t1	0.239354	0.2	0.106	4.32904e-09
g25336.t1	0.225789	0.307	0.198	4.68315e-09
g13987.t1|SYEP-MOUSE	0.205404	0.581	0.475	4.92927e-09
g31632.t1|HES1B-XENLA	0.258607	0.239	0.136	4.95784e-09
g25119.t1|PP2C2-CAEEL	0.122708	0.173	0.081	5.31981e-09
g18477.t1|FORF-DICDI	0.087979	0.075	0.015	5.42626e-09
g9527.t1|PLSI-BOVIN	0.113801	0.08	0.019	5.86443e-09
g6622.t1|TRIM2-BOVIN	0.176864	0.26	0.155	6.55012e-09
g929.t1|STOX1-HUMAN	0.160836	0.159	0.073	6.61642e-09
g3250.t1	0.122148	0.077	0.017	6.85097e-09
g31684.t1|PGK-CAEEL	0.22076	0.726	0.648	7.17791e-09
g32471.t1|ALDH2-HUMAN	0.219916	0.595	0.491	7.19021e-09
g6340.t1|PTEN-HUMAN	0.148175	0.107	0.036	7.47665e-09
g21683.t2|CSP1-ARATH	-0.189184	0.789	0.847	7.6246e-09
g24866.t1|DYRK2-MOUSE	0.182797	0.429	0.309	8.9884e-09
g9117.t1	0.252441	0.165	0.08	9.10948e-09
g18103.t1|AT5F1-BOVIN	0.151369	0.893	0.842	9.64144e-09
g32117.t1	0.0751548	0.05	0.003	9.66843e-09
g29090.t1	0.125489	0.085	0.021	9.68985e-09
g1084.t1|CSK2B-XENLA	0.183167	0.335	0.22	1.02488e-08
g4599.t1|DCC-HUMAN	0.171268	0.176	0.086	1.04269e-08
g595.t1|PRDX4-BOVIN	-0.265814	0.255	0.352	1.05565e-08
g5619.t1|VATL-RAT	0.13568	0.968	0.971	1.07096e-08
g26687.t1|AQP9-HUMAN	0.106257	0.052	0.004	1.08738e-08
g20867.t1|HMCN1-HUMAN	0.106067	0.078	0.018	1.1828e-08
g10788.t1|KALRN-HUMAN	0.175326	0.208	0.112	1.21259e-08
g7355.t1	0.18433	0.577	0.444	1.47775e-08
g7356.t1|MILK2-RAT	0.237102	0.479	0.375	1.54005e-08
g6116.t1|NALP7-HUMAN	0.0706287	0.051	0.004	1.58649e-08
g28712.t1|FLOT1-DROME	0.211728	0.581	0.478	1.70237e-08
g20122.t1|PCY1B-RAT	0.203782	0.386	0.272	1.84384e-08
g6628.t1|CLCN3-PONAB	0.175155	0.195	0.102	1.88413e-08
g15493.t1|OFUT2-MOUSE	0.185154	0.299	0.188	1.96773e-08
g33081.t1|CISY-GLOMM	0.198358	0.696	0.616	2.00433e-08
g10565.t1|ICMT-RAT	0.109345	0.994	0.99	2.01391e-08
g1667.t1|CI172-HUMAN	0.231871	0.259	0.159	2.25092e-08
g25494.t1|GGT1-PIG	0.397771	0.264	0.176	2.3036e-08
g10230.t1|ZAN-HUMAN	0.0847113	0.073	0.015	2.32092e-08
g8709.t1|SEPT2-CHICK	0.168151	0.226	0.127	2.33866e-08
g9631.t1|FP-ACRMI	0.210645	0.484	0.368	2.41892e-08
g22636.t1	0.250013	0.427	0.305	2.97173e-08
g32582.t1|SHRM4-MOUSE	-0.286449	0.429	0.518	3.05603e-08
g13109.t1	0.108918	0.113	0.041	3.30792e-08
g14217.t1	0.189818	0.766	0.676	3.3261e-08
g24373.t1|DCDC1-HUMAN	0.151129	0.171	0.083	3.44308e-08
g14919.t1|RS9-RAT	-0.102732	0.978	0.989	3.70777e-08
g22317.t1|RERG-BOVIN	-0.384083	0.203	0.286	3.92893e-08
g6625.t1|TSN11-HUMAN	0.196691	0.457	0.339	4.08144e-08
g13175.t1	-0.0463062	0.001	0.019	4.21402e-08
g3432.t1	0.156119	0.422	0.283	4.26132e-08
g26884.t1|MCTP1-HUMAN	-0.268939	0.346	0.44	4.35308e-08
g8819.t1	0.130875	0.135	0.058	4.59141e-08
g24810.t3|FCHO2-DANRE	0.166951	0.292	0.185	4.89101e-08
g31434.t1|OPSD1-MIZYE	-0.101349	0.054	0.117	5.29696e-08
g26549.t1	0.144065	0.106	0.038	5.59348e-08
g6586.t1|PCCA-HUMAN	-0.211383	0.699	0.729	5.7384e-08
g2102.t1|B3GN7-HUMAN	0.16776	0.326	0.21	5.76854e-08
g18928.t1|ECE1-CAVPO	0.111437	0.118	0.045	6.43084e-08
g14199.t1	0.232263	0.521	0.418	6.86365e-08
g22615.t1|FUT5-GORGO	-0.445351	0.351	0.408	6.86776e-08
g11444.t1|ZSWM4-HUMAN	0.165414	0.157	0.074	7.04502e-08
g10543.t1|RL10A-RAT	-0.161272	0.927	0.953	7.05984e-08
g13918.t1|NCAM1-BOVIN	0.18916	0.767	0.708	7.15229e-08
g28306.t1|F134C-MOUSE	0.155422	0.211	0.117	7.20396e-08
g3641.t3|DMD-CHICK	-0.279387	0.158	0.242	7.75399e-08
g7126.t1|AGAP1-HUMAN	0.167147	0.281	0.176	8.06355e-08
g1513.t1|RS14-PODCA	-0.116874	0.964	0.981	8.26424e-08
g18872.t2|RHG07-BOVIN	0.201658	0.456	0.338	8.49038e-08
g3976.t1	-0.278538	0.129	0.209	8.54071e-08
g6959.t1|NNTM-HUMAN	0.245117	0.524	0.42	9.32473e-08
g27993.t1|ATP5J-RAT	0.156608	0.795	0.729	9.91743e-08
g22718.t1|IPP2-RABIT	0.162966	0.493	0.378	1.17069e-07
g5175.t1|ISCA1-DROME	0.158866	0.292	0.187	1.21399e-07
g26393.t1	0.21891	0.559	0.441	1.23108e-07
g21580.t1|SDHB-CHICK	0.180673	0.685	0.593	1.23403e-07
g27954.t1	0.106893	0.1	0.035	1.28018e-07
g24029.t1|NDUS3-GORGO	0.196594	0.474	0.368	1.36081e-07
g21255.t1|BETL-LISMN	0.0864502	0.108	0.039	1.46546e-07
g33439.t1|PAO-MAIZE	-0.108349	0.007	0.036	1.56731e-07
g30462.t1	0.484604	0.119	0.05	1.76352e-07
g25710.t1	-0.512482	0.209	0.298	1.93544e-07
g17707.t1|NP1L1-PONAB	-0.175008	0.811	0.836	2.09234e-07
g239.t1|NDRG3-RAT	0.14394	0.252	0.152	2.13769e-07
g11723.t1|NAS14-CAEEL	0.200698	0.186	0.308	2.20319e-07
g26125.t1|ARPC2-MOUSE	0.179296	0.548	0.443	2.20509e-07
g22258.t1|DAG1-MOUSE	0.19336	0.579	0.451	2.28719e-07
g12180.t1|GSH0-RAT	0.121309	0.104	0.038	2.39271e-07
g11988.t2|LRRX1-DICDI	0.163194	0.118	0.049	2.65868e-07
g30305.t1|NPC2-DROME	0.562559	0.383	0.306	2.79479e-07
g9056.t1|ADD-ENTFA	-0.301804	0.214	0.299	2.81611e-07
g33497.t2|CO5A2-MOUSE	-0.305245	0.228	0.314	2.98984e-07
g32469.t1|ATPA-PONAB	0.123781	0.916	0.871	3.11941e-07
g21976.t1|DIRA1-HUMAN	0.175417	0.175	0.092	3.20828e-07
g30367.t1	0.165655	0.466	0.348	3.22326e-07
g12291.t1|HMCN1-HUMAN	0.359005	0.265	0.178	3.37182e-07
g32795.t1	0.121252	0.12	0.05	3.43066e-07
g16562.t1	-0.0780277	0.008	0.038	3.44284e-07
g14525.t1|TTC28-HUMAN	0.220219	0.18	0.097	3.65971e-07
g2356.t1|ANO7-MOUSE	-0.249301	0.119	0.193	4.14902e-07
g29956.t1|ITB1-SHEEP	0.158919	0.346	0.244	4.49192e-07
g6973.t1|COX5B-HUMAN	0.168247	0.826	0.759	4.71941e-07
g20872.t1|NDUB8-BOVIN	0.167327	0.432	0.319	4.76296e-07
g14262.t1	0.0939059	0.048	0.004	4.99473e-07
g29683.t1|SC61B-PONAB	-0.214831	0.774	0.811	5.19093e-07
g7129.t1|VIAAT-XENLA	0.131527	0.102	0.038	5.78243e-07
g22325.t1|RL44-CANTR	-0.104602	0.982	0.989	5.78685e-07
g25703.t1|PIGE-DROME	0.17162	0.358	0.249	5.86887e-07
g2608.t1|RASLC-DANRE	0.408932	0.222	0.142	6.22196e-07
g21855.t1	0.0692064	0.049	0.005	6.80151e-07
g20801.t1|NDUA8-BOVIN	0.173708	0.628	0.53	7.01978e-07
g30343.t1|CD5R1-BOVIN	0.0974099	0.069	0.017	7.20994e-07
g15708.t1	0.0653941	0.04	0.001	7.28127e-07
g21406.t1	0.14848	0.266	0.163	7.55836e-07
g15582.t1|WNT11-XENLA	0.223285	0.057	0.01	8.03781e-07
g7395.t1|SPTB2-MOUSE	0.165303	0.237	0.143	8.08254e-07
g9795.t1	0.0828089	0.058	0.011	8.14402e-07
g1970.t1|TAOK3-CHICK	0.112639	0.13	0.058	8.22495e-07
g6120.t1|KIF28-MOUSE	0.356827	0.182	0.103	8.82103e-07
g18074.t1|MRCKA-MOUSE	0.171214	0.441	0.333	8.84418e-07
g23080.t1|CIP4-DANRE	0.133921	0.345	0.234	9.00836e-07
g20342.t1|G3P2-DANRE	0.133176	0.888	0.822	9.029e-07
g5564.t1|SCE3-SCHPO	-0.211549	0.493	0.572	9.09465e-07
g10792.t1|PP1R7-MOUSE	0.158053	0.325	0.221	9.67273e-07
g10648.t1|BGAL-PONAB	0.222443	0.11	0.046	1.04636e-06
g32585.t1|CR3L1-MOUSE	-0.348468	0.462	0.521	1.08768e-06
g18439.t1	0.251536	0.108	0.044	1.11196e-06
g196.t1|RLA0-DANRE	-0.111581	0.977	0.989	1.117e-06
g29946.t1|HSP70-HYDVU	0.21233	0.765	0.687	1.13611e-06
g11952.t1|FADD-DROME	0.147723	0.136	0.065	1.14744e-06
g21559.t1|PFD2-HUMAN	0.189064	0.588	0.481	1.16133e-06
g29124.t1|SH3K1-HUMAN	0.16079	0.582	0.473	1.1653e-06
g18421.t1|RSSA-HYDVD	-0.151585	0.917	0.942	1.20024e-06
g18064.t1|ESTD-BOVIN	0.168698	0.373	0.268	1.20579e-06
g24495.t2	0.0679902	0.039	0.001	1.30535e-06
g21921.t1|PIPNA-BOVIN	0.139405	0.763	0.653	1.50923e-06
g24123.t1|NEB1-HUMAN	0.0805517	0.156	0.077	1.54775e-06
g30357.t1|NACA-ORENI	-0.13425	0.913	0.925	1.57272e-06
g26970.t1|E13C-TOBAC	-0.737018	0.393	0.414	1.63815e-06
g33714.t2|RHG20-HUMAN	0.184186	0.231	0.141	1.65204e-06
g14428.t1|ACK1-BOVIN	-0.0802374	0.012	0.044	1.82683e-06
g22649.t1|KPCD-MOUSE	0.133711	0.356	0.243	1.83475e-06
g449.t1|TMOD3-MOUSE	0.144186	0.582	0.432	1.85731e-06
g4081.t1|PR3CB-DANRE	0.576693	0.244	0.167	1.95156e-06
g21899.t1|RL27A-XENLA	-0.107166	0.981	0.988	2.04013e-06
g32566.t1|ADDA-PONAB	0.11562	0.113	0.047	2.05626e-06
g33806.t1|RAN-BRUMA	-0.166405	0.731	0.777	2.13653e-06
g27996.t1|RS25-BRABE	-0.0946522	0.987	0.994	2.32828e-06
g33573.t1|B4GT5-MOUSE	0.178126	0.394	0.289	2.37455e-06
g25533.t1|CNTP2-HUMAN	0.2272	0.39	0.282	2.45965e-06
g9829.t1|ITA9-MOUSE	0.18497	0.391	0.288	2.53081e-06
g20384.t1	0.186471	0.601	0.489	2.55154e-06
g29032.t1|NDUB7-DICDI	0.174822	0.551	0.451	2.62269e-06
g8395.t1|RS23-ICTPU	-0.0935608	0.987	0.998	2.78427e-06
g19345.t1|ARHGC-MOUSE	0.148329	0.209	0.122	2.79311e-06
g14572.t1|AMT3-CAEEL	-0.107245	0.973	0.988	2.87707e-06
g5302.t1	0.0678586	0.037	0.001	2.98888e-06
g7753.t1|PKN2-DANRE	0.10251	0.086	0.029	3.02122e-06
g22241.t1|AEN-RAT	-0.217786	0.595	0.656	3.06443e-06
g4550.t1|SODC2-MAIZE	0.158672	0.776	0.694	3.0877e-06
g14795.t1|TSP4B-DANRE	0.30112	0.119	0.054	3.10779e-06
g33797.t1|CLCN3-RAT	0.155387	0.269	0.174	3.4714e-06
g27300.t1|PK3CD-MOUSE	0.179642	0.486	0.379	3.51372e-06
g4509.t1|OPTN-DANRE	0.20372	0.669	0.57	3.56707e-06
g24936.t1|PSD10-DICDI	0.146749	0.157	0.08	3.64007e-06
g30537.t1|ERO1B-HUMAN	-0.381977	0.442	0.504	3.64415e-06
g19963.t1|CAP-HYDVD	0.161388	0.833	0.79	4.13584e-06
g18764.t1|F186A-HUMAN	-0.235948	0.348	0.426	4.36458e-06
g4308.t2|KALRN-MOUSE	0.190768	0.215	0.13	4.60245e-06
g29635.t1|PAO-MAIZE	0.162799	0.267	0.174	4.95735e-06
g13674.t1|TM55B-HUMAN	0.166749	0.293	0.197	5.11518e-06
g24690.t1|RS10-SPOFR	-0.146245	0.906	0.934	5.19473e-06
g19546.t1|AASS-MOUSE	0.222453	0.187	0.109	5.30327e-06
g14550.t1|CTRO-HUMAN	0.172438	0.211	0.127	5.33897e-06
g8590.t1|ANO4-BOVIN	0.117724	0.068	0.019	5.74203e-06
g10581.t1|H2A-ONCMY	0.19394	0.314	0.213	6.02184e-06
g23047.t1|PLPL9-MOUSE	-0.27464	0.215	0.298	6.24477e-06
g1623.t1	0.131863	0.121	0.055	6.44896e-06
g23012.t1|CYPH-CATRO	0.122857	0.973	0.953	6.50131e-06
g12598.t1|RL31-CYAPA	-0.137971	0.962	0.966	7.33937e-06
g10819.t1|PKD2-ORYLA	0.0753423	0.046	0.006	7.5894e-06
g18097.t1|SI1L1-MOUSE	0.11279	0.314	0.212	7.9697e-06
g26988.t1|ANPRA-HUMAN	0.190534	0.329	0.234	8.6823e-06
g23109.t1	0.308757	0.228	0.15	9.17837e-06
g8550.t1|ASIC3-HUMAN	-0.155706	0.077	0.138	9.41676e-06
g900.t1|BTG1-CHICK	-0.245808	0.377	0.454	9.67378e-06
g17908.t1|FBN3-HUMAN	0.0714364	0.074	0.022	9.92977e-06
g9184.t2|KAPR2-DROME	-0.0385838	0.005	0.027	9.95608e-06
g9564.t1|QCR8-RAT	0.173199	0.632	0.544	1.02665e-05
g16639.t1|DUS15-MOUSE	0.154142	0.165	0.09	1.04873e-05
g30365.t1|NOG1-HUMAN	-0.188368	0.709	0.764	1.05544e-05
g33693.t1|LBP-HUMAN	0.188331	0.082	0.028	1.08211e-05
g12024.t1|RL36-IXOSC	-0.0902589	0.985	0.996	1.08608e-05
g21786.t1|HACD2-MOUSE	0.191821	0.404	0.306	1.19951e-05
g4000.t1|APT-YARLI	0.142687	0.105	0.044	1.24727e-05
g6799.t1|SYYC-CHICK	0.190117	0.42	0.319	1.25345e-05
g32764.t1|JAZF1-MOUSE	0.13022	0.151	0.078	1.29056e-05
g6287.t1	0.0837528	0.132	0.063	1.42834e-05
g18366.t1|SERIC-NEMVE	0.14248	0.202	0.119	1.43544e-05
g4480.t1|DNAJ1-CHLAE	0.101863	0.987	0.978	1.4408e-05
g9772.t2|CLPX-MOUSE	0.154855	0.253	0.162	1.55331e-05
g25397.t1|AB22G-ARATH	-0.0825587	0.028	0.069	1.56882e-05
g30298.t1|AGRIN-CHICK	-0.357313	0.357	0.424	1.59078e-05
g360.t1|IOV7-CHICK	-0.144481	0.058	0.112	1.60169e-05
g4332.t1	0.121668	0.308	0.208	1.71047e-05
g21794.t1|PSMD7-DROME	0.157463	0.634	0.527	1.94136e-05
g3107.t1	0.1937	0.443	0.347	1.95451e-05
g30922.t2|ABLM1-HUMAN	0.105272	0.148	0.076	1.98828e-05
g17523.t1	0.152093	0.649	0.553	2.03686e-05
g9166.t1|CAH2-TRIHK	0.108619	0.129	0.062	2.12022e-05
g31493.t1|PHAX-MOUSE	0.122682	0.224	0.139	2.15348e-05
g19747.t1|AL3A1-MOUSE	-0.404483	0.225	0.295	2.17749e-05
g17688.t1	0.0516537	0.04	0.004	2.24768e-05
g24547.t1|H33-TRIPS	0.266663	0.789	0.715	2.28849e-05
g10519.t1|PRIC2-HUMAN	-0.254203	0.448	0.505	2.34307e-05
g864.t1|ASM-BOVIN	0.191326	0.288	0.198	2.36316e-05
g9522.t1	0.118001	0.136	0.068	2.63604e-05
g30294.t1|TNIK-MOUSE	0.138882	0.217	0.132	2.64049e-05
g25767.t1|FRIH-TREBE	0.498901	0.514	0.471	2.77037e-05
g18842.t1|WLS-MOUSE	0.109993	0.111	0.05	3.06995e-05
g11765.t1|GSC-DROME	0.118922	0.06	0.015	3.0761e-05
g1216.t1|RAB7-EPICO	0.138347	0.534	0.422	3.23088e-05
g29969.t1|ACER3-HUMAN	0.0951612	0.152	0.08	3.41723e-05
g21831.t1|RL6-CHILA	-0.110255	0.956	0.969	3.44959e-05
g15133.t1|PRRT1-RAT	0.164011	0.551	0.451	3.53015e-05
g16533.t1|SELS-RAT	0.141916	0.404	0.301	3.57573e-05
g11167.t1	-0.0383358	0.004	0.025	3.5792e-05
g4555.t1|ATG12-HUMAN	0.141873	0.296	0.204	3.62771e-05
g21910.t1	0.07352	0.042	0.005	3.69866e-05
g7319.t1|GRM5-HUMAN	0.0571049	0.054	0.012	3.70112e-05
g17687.t1|KIF3B-MOUSE	0.0630634	0.031	0	3.70646e-05
g13697.t1|CDD-DICDI	0.150282	0.321	0.229	3.99494e-05
g15447.t1|THIL-DANRE	0.163115	0.328	0.233	4.00974e-05
g33115.t1|1433Z-BOMMO	0.112331	0.879	0.859	4.01034e-05
g30421.t1	-0.281408	0.243	0.323	4.0327e-05
g11399.t1|FSTL1-BOVIN	0.455409	0.364	0.292	4.09514e-05
g6635.t1|ZER1-HUMAN	0.0815506	0.069	0.021	4.48342e-05
g7502.t1|CY24B-BISBI	0.0689124	0.04	0.004	4.53518e-05
g15359.t1|ZIC3-HUMAN	0.379257	0.153	0.089	4.56894e-05
g3121.t1|PLS2-BOVIN	0.141231	0.293	0.203	4.83664e-05
g14720.t1|LIPA1-HUMAN	0.157105	0.423	0.319	4.87114e-05
g3528.t1|GBLP-HYDVU	-0.126234	0.819	0.875	4.95502e-05
g6295.t1|SH319-MOUSE	0.116589	0.242	0.156	5.13499e-05
g1140.t3|RET-RAT	0.065843	0.054	0.012	5.39064e-05
g22585.t1|DUS7-MOUSE	0.210078	0.606	0.531	5.40283e-05
g4506.t1|UK114-HUMAN	0.174589	0.435	0.33	5.45087e-05
g14435.t1|ADA1A-ORYLA	0.09583	0.053	0.012	5.45405e-05
g4585.t1|RAB4B-DANRE	0.135245	0.244	0.157	5.56225e-05
g16834.t1|MDHC-HUMAN	-0.138728	0.826	0.855	5.57904e-05
g2903.t1|MGT4B-DANRE	0.108219	0.272	0.181	5.84972e-05
g12787.t1|ANX12-HYDVU	0.115976	0.948	0.933	6.23997e-05
g25044.t1	0.236087	0.415	0.31	7.0513e-05
g18807.t1|RL37A-YEAST	-0.127044	0.936	0.952	7.69453e-05
g7262.t1|CTNB-URECA	0.167388	0.416	0.322	7.84247e-05
g32981.t1|RL7-CHICK	-0.0873333	0.986	0.994	7.9676e-05
g12461.t1|SURF4-DROME	-0.228784	0.48	0.553	8.19303e-05
g11271.t1|VWA3B-HUMAN	0.156327	0.188	0.112	8.504e-05
g12236.t1	-0.203177	0.599	0.649	8.65415e-05
g7119.t1|3BP5-HUMAN	0.251641	0.248	0.169	8.81534e-05
g8346.t1|PM34-HUMAN	0.127433	0.251	0.167	9.06531e-05
g10289.t1|PURA-MOUSE	0.149431	0.768	0.694	9.97143e-05
g30952.t1|RS15-PODAS	-0.0907309	0.99	0.997	0.000101842
g30893.t1|PPA2-ARATH	0.208287	0.431	0.336	0.00010499
g13194.t2|RN150-MOUSE	0.155104	0.887	0.818	0.00011195
g31668.t1|E41L3-MOUSE	0.162075	0.342	0.25	0.000114341
g10482.t1|PAK3-RAT	0.122309	0.509	0.394	0.000117916
g12046.t1|DPYS-RAT	0.0682512	0.048	0.01	0.000119123
g15457.t1|ATX3-RAT	0.152909	0.198	0.121	0.000122578
g13140.t1|IFT46-DANRE	0.0871426	0.078	0.028	0.000122681
g29921.t2|ZFYV9-HUMAN	0.193482	0.383	0.288	0.000123823
g24862.t1|HEXP-LEIMA	-0.153984	0.801	0.815	0.000126551
g24983.t1|ZBED4-HUMAN	0.18512	0.137	0.073	0.000137771
g22716.t1|RL35A-PONAB	-0.182727	0.779	0.808	0.000137806
g5127.t1	-0.0441628	0.006	0.028	0.000138776
g24589.t1|GNAQ-MIZYE	0.180803	0.461	0.368	0.000142381
g10687.t1|ACADM-BOVIN	0.146271	0.483	0.379	0.000143176
g7393.t1|SPTCB-DROME	0.138789	0.247	0.162	0.000143225
g10794.t1|SIM12-MOUSE	0.162039	0.359	0.267	0.000151739
g24643.t3	0.141841	0.194	0.119	0.000154822
g16171.t1|GPR1-MACMU	-0.0708332	0.041	0.086	0.000157099
g13459.t1|ABRAL-SALSA	0.156562	0.565	0.469	0.000162846
g13532.t1|MACF1-HUMAN	0.179625	0.341	0.25	0.000168057
g32361.t2|OAZ2-MOUSE	0.182066	0.365	0.27	0.000170446
g7754.t1|PKN1-RAT	0.147922	0.353	0.259	0.000171662
g15241.t1|GALR2-HUMAN	-0.193449	0.123	0.189	0.000184091
g31283.t1|SYT11-HUMAN	-0.103948	0.047	0.094	0.000186927
g18312.t1|ZNFX1-HUMAN	0.147543	0.375	0.278	0.000191986
g10077.t1|STAC3-HUMAN	0.121785	0.248	0.164	0.000232404
g2943.t1|CSRP2-RAT	-0.131023	0.235	0.323	0.000243921
g22426.t1|LASP1-PONAB	0.153648	0.768	0.687	0.000251597
g27398.t1	0.147092	0.232	0.151	0.000253889
g3972.t1|PMM-SOYBN	0.107853	0.231	0.151	0.000262361
g1824.t1|NEK7-MOUSE	0.146695	0.215	0.138	0.000267087
g682.t1|OPN4-PHOSU	-0.0660911	0.023	0.058	0.000277239
g5416.t1|LGR5-MOUSE	0.141534	0.039	0.005	0.000277918
g22723.t1|FUD1B-XENLA	0.0936404	0.284	0.196	0.000284335
g23612.t1|IF4H-MOUSE	-0.166501	0.584	0.655	0.000297755
g20079.t1	-0.0674375	0.255	0.339	0.000301086
g24822.t1|CALR-RABIT	-0.142157	0.992	0.999	0.000311269
g17198.t3|KCC2D-CAEBR	0.167785	0.287	0.202	0.000311925
g30573.t1|HLDE-SHESA	0.0885533	0.076	0.028	0.0003139
g15357.t1|ANK3-MOUSE	0.0557736	0.035	0.004	0.000318429
g21752.t1|MMSA-RAT	0.163212	0.558	0.448	0.000324478
g2492.t1|SH24A-MOUSE	0.12375	0.252	0.168	0.000329729
g2581.t1|GPI8-HUMAN	0.133753	0.266	0.183	0.00033209
g10056.t1|VP302-LYCMC	-0.0584922	0.013	0.041	0.000332917
g9814.t1	0.111193	0.195	0.121	0.000349716
g16788.t1	0.0636796	0.085	0.034	0.000359303
g29539.t1|SDS3-MOUSE	0.138709	0.325	0.233	0.000386218
g11780.t1|SP4-MOUSE	-0.117803	0.038	0.08	0.000389827
g18302.t1|GRM8-HUMAN	0.111036	0.197	0.121	0.000395077
g11471.t1|CALM-PLAFA	0.37037	0.225	0.155	0.000401248
g23847.t1|CYTSA-XENTR	0.144224	0.284	0.198	0.000416122
g27977.t1|HS12A-HUMAN	-0.304801	0.434	0.482	0.000443448
g28121.t1|MYLIP-HUMAN	0.142647	0.348	0.258	0.000446276
g32595.t1|TM199-PONAB	0.121896	0.179	0.108	0.000450636
g8769.t1|PIRL-SOLLC	0.12833	0.297	0.206	0.000462614
g31440.t1|NPYR-DROME	-0.0543301	0.008	0.03	0.000469529
g27807.t1|GBRB1-MOUSE	0.158144	0.108	0.051	0.000478437
g17878.t1	-0.113838	0.11	0.179	0.000558704
g14507.t1|SEP2B-XENLA	0.166961	0.371	0.283	0.000592703
g10361.t1	0.156504	0.394	0.304	0.000594218
g14383.t1	0.269394	0.197	0.131	0.000595104
g29538.t1|RL23A-RAT	-0.110419	0.928	0.94	0.000600723
g10912.t1|BCAT-NEMVE	-0.123297	0.052	0.098	0.000607306
g4335.t1|CATL-DROME	0.276198	0.565	0.492	0.000665691
g22314.t1|NPAL2-HUMAN	0.0773447	0.142	0.078	0.000709769
g14912.t1	0.3848	0.123	0.069	0.000715049
g24744.t1|DEP1B-MACFA	-0.103227	0.051	0.097	0.000748342
g18376.t1|KYNU-NEMVE	-0.0670756	0.008	0.031	0.00076769
g15393.t1|EPN2-HUMAN	0.144633	0.553	0.456	0.000782868
g11474.t2|TRPV6-HUMAN	-0.18067	0.175	0.246	0.000788138
g19915.t1|DOK1-HUMAN	0.130892	0.372	0.282	0.000829625
g23720.t1|FOS-CYPCA	-0.174327	0.743	0.795	0.000832821
g26866.t1|ZNF28-HUMAN	0.135414	0.311	0.225	0.000848707
g28741.t1|H2AY-CHICK	0.117058	0.855	0.803	0.000849511
g30854.t1|TACC3-XENLA	0.0911159	0.172	0.102	0.000877457
g1656.t1|NXNL2-MOUSE	0.162721	0.358	0.274	0.000937706
g19264.t1|MNB-DROME	0.135178	0.225	0.148	0.000942895
g240.t1|THTM-HUMAN	0.0865983	0.248	0.167	0.000954598
g14182.t1|PCDL-ACRMI	0.0447268	0.026	0	0.00100539
g30448.t1|LRP1B-HUMAN	-0.0728936	0.043	0.087	0.0010066
g14888.t1|SUCB1-HUMAN	0.0645747	0.116	0.058	0.00102418
g28957.t1|CHI1-THECC	0.245701	0.203	0.137	0.0010317
g31895.t2	-0.124962	0.017	0.046	0.00103589
g11070.t1|SPD2A-HUMAN	0.0988328	0.151	0.087	0.00108183
g19355.t1	-0.0784977	0.027	0.063	0.00112297
g20614.t1	-0.105007	0.071	0.122	0.00112501
g4938.t1|DIAP2-HUMAN	0.165838	0.312	0.229	0.0011533
g14018.t1|POSTN-HUMAN	-0.0578587	0.023	0.056	0.00122931
g3745.t1|RAS2-HYDVU	0.157852	0.383	0.291	0.00128609
g32373.t1|CY1-HUMAN	0.135945	0.702	0.628	0.00131151
g32436.t1	0.111192	0.147	0.083	0.00140917
g31842.t1	0.0361787	0.029	0.002	0.00140944
g1532.t1|ABCA2-HUMAN	0.0371844	0.034	0.004	0.00141325
g17452.t1	0.140731	0.133	0.074	0.00141902
g15707.t1	-0.0847449	0.085	0.143	0.00146667
g5621.t1|PITX1-XENLA	0.059734	0.031	0.003	0.0014955
g4778.t1|KAT3-DANRE	0.159381	0.123	0.066	0.00150146
g18522.t1|UBA5-BRAFL	-0.217022	0.141	0.203	0.00159041
g27596.t1	-0.0943476	0.037	0.076	0.0016716
g20575.t1|BRAP-HUMAN	0.127114	0.828	0.79	0.00167602
g6466.t1|ABR-BOVIN	0.137906	0.058	0.019	0.00168301
g1972.t1	0.104542	0.155	0.089	0.00170492
g28744.t1|BMP2K-HUMAN	0.10911	0.218	0.142	0.00170633
g3248.t1|RAB8A-RAT	0.170852	0.689	0.628	0.00172335
g22859.t1|TUT4-MOUSE	0.130767	0.276	0.193	0.00173963
g14427.t1|TRAK1-HUMAN	0.130084	0.316	0.231	0.00181539
g7895.t1|CTRC-MOUSE	0.290095	0.442	0.349	0.00183288
g13228.t2|CBPA2-RAT	0.21838	0.085	0.038	0.00192185
g598.t1|PARP4-HUMAN	0.123883	0.27	0.189	0.00193168
g29647.t1	0.0983684	0.117	0.061	0.00202962
g6735.t1|RMD1-HUMAN	0.139324	0.589	0.517	0.00205073
g6213.t1|ECI2-HUMAN	0.112642	0.353	0.26	0.0020589
g5525.t1|ERG-HUMAN	0.0493017	0.028	0.002	0.00211715
g8784.t1|MOT10-DANRE	0.147532	0.106	0.054	0.00217032
g15052.t1	0.0471239	0.03	0.003	0.00223284
g16642.t1|DUS22-HUMAN	0.106865	0.08	0.035	0.00238215
g23931.t1|NCK1-HUMAN	0.0752505	0.107	0.053	0.00242222
g22713.t3	-0.248825	0.292	0.351	0.00249187
g16168.t1|GRP78-CHICK	-0.219322	0.83	0.879	0.00252925
g894.t1|ACSA-HUMAN	0.145429	0.308	0.226	0.00264059
g4670.t1	-0.0664967	0.111	0.174	0.00267921
g24349.t1	0.328746	0.25	0.182	0.00268882
g6446.t1|UBE2C-HUMAN	-0.20777	0.173	0.239	0.00269896
g7108.t1|FUCTA-DROME	-0.244226	0.072	0.119	0.00270599
g4606.t1|PJVK-HUMAN	0.112494	0.292	0.209	0.00273197
g18365.t1|PABP1-MOUSE	-0.128933	0.922	0.919	0.00285473
g12335.t1|RL5-STYCL	-0.0902521	0.912	0.936	0.00286269
g21759.t1|CCY1B-XENLA	0.133361	0.243	0.167	0.00293129
g2786.t1	-0.120986	0.03	0.066	0.00299558
g312.t1|RL13A-MACFA	-0.0912001	0.976	0.991	0.00308919
g29832.t1|UB2L3-MOUSE	0.114618	0.89	0.825	0.00311479
g5586.t1|ACOC-HUMAN	0.151818	0.286	0.207	0.0032545
g15938.t2|VPP1-MOUSE	0.114544	0.438	0.35	0.00343484
g26466.t1|PPBT-CHICK	0.211548	0.124	0.071	0.00349389
g25046.t1|UBE2A-MOUSE	0.133205	0.395	0.314	0.00351796
g10739.t1|HSBP1-HUMAN	0.146767	0.44	0.351	0.00357722
g8484.t1|CRYAB-RAT	0.216278	0.413	0.331	0.00360787
g15384.t1	-0.225919	0.229	0.293	0.00364356
g6161.t1|UCRI-LAGLA	0.124276	0.729	0.663	0.00371332
g24560.t1|MYO15-HUMAN	0.054045	0.033	0.004	0.00371995
g1208.t1|TM175-DANRE	-0.0548399	0.002	0.016	0.00374784
g26982.t1	-0.0342054	0.003	0.018	0.00377411
g24305.t1|PASK-MOUSE	0.0980692	0.127	0.07	0.0037987
g30707.t1|ANXA7-BOVIN	0.122377	0.835	0.777	0.00385246
g7977.t1|MMP24-MOUSE	0.545326	0.448	0.403	0.00386734
g32509.t1|KN14I-ORYSJ	0.111453	0.109	0.057	0.00390922
g1781.t1|PSB5-RAT	0.131069	0.501	0.409	0.00394964
g9237.t1|COX5A-MACPM	0.126896	0.797	0.727	0.00405573
g7609.t1|CATL-DROME	0.349615	0.413	0.352	0.00408617
g15071.t1|MIC60-HUMAN	0.104919	0.23	0.156	0.00412276
g893.t1|RAB9A-RAT	0.0874472	0.221	0.146	0.00413737
g5723.t1|ROCK2-HUMAN	0.09892	0.234	0.159	0.00420332
g21274.t1|MYPT2-MOUSE	0.145242	0.474	0.388	0.00445224
g1752.t1|VANG1-HUMAN	0.0955029	0.163	0.098	0.00446386
g33570.t1|OLA1-DANRE	0.143007	0.558	0.489	0.00452883
g12323.t1	0.113145	0.143	0.083	0.00453445
g6824.t1|EF1B-XENLA	-0.147064	0.782	0.82	0.00483779
g29440.t1|TPPC3-RAT	0.103647	0.287	0.206	0.00497094
g27164.t1|FLNA-HUMAN	0.160032	0.292	0.213	0.00498642
g29887.t1|TM2D1-HUMAN	0.112168	0.244	0.171	0.00501417
g29030.t1|MTPN-RAT	0.210528	0.304	0.228	0.00505966
g31371.t1|DNJ6B-XENLA	0.101987	0.362	0.27	0.00511135
g29478.t1|YJBM-BACSU	0.246256	0.232	0.167	0.00526785
g22433.t1	0.107284	0.632	0.561	0.00531045
g2020.t1|RNKB-CERCA	0.0912284	0.571	0.477	0.00534324
g2319.t1|AF1L2-BOVIN	0.0786018	0.16	0.097	0.00578192
g30530.t1|RETST-DANRE	0.0671914	0.207	0.135	0.00594134
g14398.t1|KMT5B-BOVIN	0.085677	0.168	0.102	0.00617806
g28647.t1|ARMC4-HUMAN	0.0429297	0.028	0.003	0.0062246
g31636.t1|TPM1-PODCA	0.0655342	0.125	0.068	0.00642722
g9640.t1|KLDC2-HUMAN	0.0614784	0.066	0.026	0.00644934
g19857.t1|ATP5L-MOUSE	0.111563	0.827	0.775	0.00672207
g1756.t1|TM147-DANRE	0.132735	0.51	0.422	0.0069724
g10515.t2|RSBNL-XENTR	0.0882082	0.083	0.038	0.00757291
g13437.t1	0.148142	0.031	0.004	0.00764696
g238.t1|US6NL-MOUSE	0.121391	0.513	0.423	0.00765465
g23471.t1|SPT6H-HUMAN	0.0514089	0.045	0.012	0.00772908
g18917.t2|PTPRO-HUMAN	0.0509509	0.066	0.026	0.00780004
g32839.t1|MDHM-PONAB	0.137549	0.66	0.591	0.00849501
g7166.t1	0.134505	0.256	0.182	0.00879704
g21979.t1|UNK-CANLF	0.10682	0.3	0.219	0.0088554
g31922.t1|INX4-DROME	-0.0669295	0.955	0.966	0.00890723
g4170.t1|CLIP1-HUMAN	-0.190071	0.267	0.334	0.00892955
g26784.t1|VMPA3-LOXIN	-0.115513	0.03	0.064	0.00906109
g6036.t2|KLF11-HUMAN	0.0427828	0.033	0.005	0.00926809
g12601.t1|UROM-RAT	0.110352	0.37	0.283	0.00931195
g1025.t1	0.0773965	0.168	0.105	0.00943629
g6732.t1|SECG-DICDI	0.0409907	0.022	0	0.00969138
g10750.t1|G3ST3-MOUSE	0.0491826	0.033	0.005	0.00981374
g10517.t1|NAS15-CAEEL	0.445906	0.252	0.194	0.00998832
g7051.t1|GOLP3-RAT	0.145766	0.528	0.452	0.0100256
g16028.t1|PDE2A-BOVIN	-0.0871552	0.053	0.095	0.0103642
g12048.t1|RS11-RAT	-0.0719625	0.986	0.99	0.0105437
g29456.t1|I5P1-HUMAN	0.0718796	0.132	0.075	0.0106842
g7197.t1|UN45A-RAT	0.101769	0.198	0.13	0.0107742
g12407.t1|CHCH7-BOVIN	0.165429	0.457	0.383	0.0107954
g32834.t1|ALDOA-RAT	-0.117142	0.702	0.731	0.0110519
g31221.t1|MARE3-HUMAN	0.132964	0.457	0.364	0.0111267
g12710.t1|RAB12-MOUSE	0.122974	0.641	0.538	0.0112464
g25065.t1	0.0952663	0.057	0.02	0.0114802
g29234.t2|SH3R1-XENLA	0.116801	0.227	0.153	0.0117557
g7871.t1	-0.496889	0.126	0.182	0.0119434
g1347.t1	0.0770945	0.114	0.062	0.0120529
g21548.t1	0.132623	0.323	0.243	0.0132752
g25162.t1	0.0915254	0.113	0.061	0.0132891
g33729.t1|HEM3-DESRM	-0.183001	0.108	0.159	0.0135094
g20543.t1	-0.0442661	0.012	0.035	0.0138828
g24115.t1|NBEL1-HUMAN	0.0687081	0.078	0.035	0.0145404
g23178.t1|PTPRS-MOUSE	0.0328724	0.065	0.026	0.0145444
g5849.t1	0.112594	0.365	0.279	0.0149949
g22683.t1|WASH7-HUMAN	0.0344648	0.044	0.012	0.0150498
g22780.t1|SC5A8-XENLA	-0.0760828	0.044	0.083	0.0152233
g2789.t1	-0.138426	0.041	0.077	0.0158222
g21055.t1|PDIA4-BOVIN	-0.208515	0.202	0.267	0.0158746
g12563.t1|CAPZA-DROME	0.0903668	0.424	0.338	0.0161201
g32898.t1|AATM-RAT	-0.159749	0.31	0.378	0.0161264
g4334.t1|CATL-DROME	0.244541	0.488	0.412	0.0170489
g16037.t1	-0.17704	0.38	0.431	0.0171053
g22100.t1|DESI1-RAT	0.0584778	0.117	0.064	0.0178182
g16319.t1|GSTM3-MACFU	0.175516	0.619	0.553	0.0179609
g15010.t1|SESQ1-RAT	0.125428	0.211	0.143	0.0180114
g24945.t1|COG2-MOUSE	0.0966014	0.4	0.316	0.0182483
g6652.t1|ADA10-HUMAN	0.161247	0.72	0.658	0.0186613
g21275.t1|PEPL1-MOUSE	0.150183	0.432	0.354	0.0191491
g2609.t1|WRN-XENLA	0.0824919	0.154	0.094	0.0197496
g24679.t1|VIPB-SALTI	0.0803536	0.279	0.197	0.0199563
g25412.t2|NOTC1-DANRE	0.149787	0.474	0.388	0.0200073
g16568.t1|DEFM-HUMAN	-0.187071	0.219	0.28	0.0201434
g12896.t1|DAG1-BOVIN	0.0491407	0.049	0.016	0.0204241
g14971.t1|CL065-DANRE	0.132195	0.382	0.306	0.0207012
g31638.t1|IQGA1-HUMAN	0.134826	0.566	0.492	0.0210579
g7196.t1|NDK-CHICK	-0.0859643	0.966	0.979	0.0211861
g7752.t1|PKN2-HUMAN	0.0428672	0.046	0.014	0.0213716
g33634.t2	0.0888261	0.09	0.045	0.0213935
g12549.t2|YTDC1-MOUSE	0.115291	0.414	0.33	0.0222827
g15042.t1|UN93A-XENLA	0.110272	0.078	0.036	0.0228047
g24772.t1|S30BP-HUMAN	0.109446	0.392	0.306	0.0231959
g24375.t1|TOP3B-HUMAN	0.101065	0.192	0.127	0.0232442
g804.t1|MARH4-HUMAN	0.0780382	0.081	0.038	0.0232485
g11728.t1|RS13-XENLA	-0.0850681	0.967	0.974	0.0236077
g23866.t1|STK-HYDVU	0.149465	0.42	0.345	0.0236942
g24776.t1	0.141255	0.478	0.407	0.0242037
g3899.t1|SRSF7-HUMAN	0.132915	0.457	0.376	0.0243453
g31304.t1|SDHA-PIG	0.103126	0.407	0.322	0.0253806
g25964.t1	0.0516627	0.039	0.01	0.0253808
g7520.t1	0.110131	0.225	0.156	0.0255357
g27338.t1|GLNA-PANAR	-0.141844	0.84	0.843	0.0255455
g30599.t1|MP2K2-XENLA	0.0723666	0.131	0.076	0.0255712
g15528.t1|UBR3-MOUSE	0.0601245	0.057	0.021	0.0257581
g18250.t1|ASNS-CHICK	-0.15332	0.333	0.411	0.0259306
g19675.t1|AOSL-PLEHO	-0.145021	0.041	0.077	0.0260168
g31029.t1|CCDCX-ANOGA	0.226202	0.535	0.456	0.0265399
g1718.t1|CHSTB-RAT	0.219396	0.436	0.355	0.0278164
g29976.t1|SPIR2-HUMAN	-0.315084	0.407	0.446	0.028037
g18951.t1|LICH-HUMAN	0.237563	0.258	0.192	0.0287842
g26677.t1|AQP9-RAT	-0.0349177	0.004	0.019	0.0288008
g22105.t1|SEPT9-HUMAN	0.135721	0.573	0.49	0.0289695
g33599.t1|ARP2-XENTR	0.132326	0.648	0.577	0.0294899
g32362.t1|M3K9-MOUSE	0.0734655	0.165	0.105	0.030265
g15835.t1|FADD-BOVIN	0.068441	0.139	0.083	0.03067
g26468.t1|PPBT-CHICK	0.0789111	0.051	0.018	0.0322396
g14471.t1|RN185-MOUSE	0.121686	0.321	0.242	0.032307
g15911.t1|MIC27-BOVIN	0.0849273	0.267	0.194	0.0333253
g12465.t1|CAPR1-BOVIN	-0.150211	0.619	0.668	0.034229
g14866.t1|NPYR-DROME	-0.0514334	0.014	0.038	0.0344506
g6728.t1|TPMT-PSEA7	0.0574448	0.048	0.016	0.03514
g30286.t1|HOGA1-DANRE	0.108283	0.255	0.183	0.0353202
g20417.t1|IST1-PONAB	0.118138	0.463	0.384	0.0358388
g27341.t1|STK25-MOUSE	0.0705231	0.275	0.201	0.0363178
g27852.t2|LRP4-HUMAN	0.0483376	0.043	0.012	0.0364359
g26797.t1|OXIR-STRAT	-0.0926412	0.089	0.138	0.0380141
g21116.t1|PFD6-MOUSE	0.143748	0.625	0.554	0.038679
g24126.t1|FOXA2-ORYLA	0.134777	0.068	0.03	0.0395189
g13750.t1|PEN2-DROME	0.106751	0.272	0.199	0.0400022
g16204.t1|HMCN1-MOUSE	-0.248408	0.388	0.433	0.0412892
g11268.t1|AT8A2-HUMAN	0.0589874	0.065	0.027	0.0434708
g15985.t1|LONF3-HUMAN	0.157167	0.202	0.14	0.0438868
g26445.t1|RL19-DROME	-0.0589642	0.993	0.997	0.045786
g16632.t1	-0.0342646	0.02	0.048	0.0462667
g25534.t1|CNTP4-MOUSE	0.0412767	0.035	0.008	0.0464387
g22253.t1	0.0684342	0.233	0.159	0.04735
g3621.t1	0.0558672	0.061	0.025	0.0474188
g9899.t1|KKCC2-RAT	0.15432	0.192	0.131	0.0474194
g19186.t1	-0.0174632	0	0.009	0.0494412
g31588.t1	0.167492	0.142	0.09	0.0494849
g17555.t1|SYAP1-MOUSE	0.0971615	0.421	0.338	0.0497086
g15321.t1|SAM13-MOUSE	0.0423605	0.093	0.048	0.0498752
g3419.t1|GNA1-DROME	-0.151517	0.114	0.164	0.0526502
g8024.t1|RTC5-ZYGRC	0.0777235	0.493	0.406	0.0540393
g19989.t1|ARHGA-HUMAN	0.06167	0.063	0.027	0.0541326
g27008.t1|ASAH1-MOUSE	-0.051254	0.016	0.04	0.0543468
g14540.t1|PGDH-CAVPO	0.136191	0.418	0.342	0.0547351
g27170.t1|GMPPB-XENTR	0.0789158	0.3	0.22	0.0551695
g31214.t1|ATP7B-RAT	0.0859769	0.192	0.129	0.0562354
g16070.t1|ASPG1-DROME	0.0868754	0.295	0.218	0.0563585
g30761.t1|TCRG1-MOUSE	0.126759	0.416	0.337	0.056839
g13145.t1|VP302-LYCMC	-0.150555	0.255	0.32	0.0577101
g24867.t1|UBE2N-PONAB	0.0843847	0.654	0.572	0.0580086
g14820.t1	0.104454	0.098	0.052	0.0593365
g12731.t1|CAR11-MOUSE	-0.0935834	0.041	0.076	0.0605381
g20636.t1|NDUS7-BOVIN	0.123753	0.499	0.421	0.0663827
g3134.t1|SSDH-RAT	0.058961	0.06	0.025	0.0666861
g11565.t1|Y1101-SYNY3	0.111122	0.266	0.196	0.0680399
g31224.t1	0.133443	0.274	0.204	0.068206
g3756.t1|AMERL-PONAB	0.0771362	0.111	0.063	0.0697146
g14954.t1|KC1D-XENLA	0.0930575	0.359	0.281	0.0700232
g14877.t1	0.101545	0.828	0.781	0.0708043
g12447.t1|ELK1-RAT	-0.206787	0.343	0.403	0.0731698
g31723.t1|SSRA-HUMAN	-0.196235	0.451	0.5	0.073398
g20093.t1|RS30-ORYLA	-0.0807483	0.974	0.98	0.0740354
g7494.t1|RADI-BOVIN	-0.0916995	0.934	0.924	0.0773788
g26558.t1|GLO2-DANRE	0.117842	0.279	0.211	0.0778184
g20083.t1|CP17A-RANDY	-0.0400152	0.001	0.01	0.0782692
g14139.t1	0.10339	0.128	0.077	0.0804192
g5078.t1|GVIN1-MOUSE	-0.031804	0.047	0.086	0.0805905
g9651.t1|SLMAP-HUMAN	0.0673941	0.283	0.208	0.0826538
g24937.t1|TAF13-PONAB	0.153739	0.416	0.339	0.0877593
g33762.t1|MPCP-MOUSE	0.102233	0.849	0.802	0.0887358
g33444.t1	-0.154428	0.538	0.604	0.0889407
g29618.t1|ATPB-HUMAN	0.109915	0.821	0.814	0.0903091
g10591.t1|AP5M1-RAT	0.0531561	0.075	0.035	0.09067
g33541.t1	0.029118	0.02	0.001	0.0923946
g7653.t1	0.110355	0.233	0.167	0.0927681
g15451.t1|FSHR-HORSE	-0.0378777	0.016	0.04	0.095121
g24294.t1|TEST-MOUSE	-0.0745202	0.248	0.328	0.0954942
g12100.t1|DDC-RAT	0.0305616	0.04	0.012	0.0973507
g594.t1|MMSA-ARATH	0.121953	0.311	0.237	0.0985357
g847.t1|FUCO2-PONAB	0.194762	0.338	0.27	0.102446
g31213.t1|EAA2-RAT	0.33948	0.211	0.161	0.103969
g29677.t1|DJB11-BOVIN	0.116064	0.446	0.371	0.105142
g224.t1	-0.246579	0.462	0.504	0.105162
g28890.t1|RL34-DANRE	-0.10534	0.96	0.973	0.107347
g17406.t3|RFX3-XENTR	-0.298423	0.222	0.266	0.107965
g948.t1|SC24C-HUMAN	-0.265011	0.327	0.376	0.109335
g33100.t1|HTK16-HYDVU	0.087038	0.177	0.12	0.111214
g9144.t1|MAT1-MOUSE	0.0821479	0.45	0.363	0.111663
g23171.t1|GDIA-BOVIN	0.0902317	0.347	0.27	0.112054
g21201.t1|CSDC2-RAT	0.122366	0.573	0.481	0.11256
g10678.t1|IFT81-MOUSE	0.130326	0.159	0.105	0.112859
g31834.t1|EBP2-MOUSE	-0.128448	0.314	0.385	0.114605
g20416.t1|GFI1B-CHICK	0.0420664	0.102	0.056	0.114935
g15406.t1|ASX-DROME	0.118422	0.199	0.138	0.116844
g29870.t1|ZN436-MOUSE	0.091435	0.256	0.186	0.117389
g23183.t2	-0.105438	0.045	0.081	0.120317
g18691.t1|ANK1-MOUSE	0.0627939	0.055	0.022	0.121239
g22608.t1|MPPD1-HUMAN	0.122614	0.442	0.368	0.123001
g9929.t1	0.0396589	0.064	0.028	0.13253
g25731.t1|MVP-STRPU	0.0559065	0.215	0.151	0.134245
g32499.t1|DOPR4-CAEEL	-0.142869	0.089	0.134	0.140682
g31647.t1|IQGA1-HUMAN	0.159633	0.556	0.48	0.141231
g17988.t1|CRYAB-BOVIN	0.171285	0.546	0.476	0.143676
g21209.t1	0.0875804	0.13	0.08	0.146509
g29609.t1	0.31662	0.232	0.179	0.146815
g3622.t1	0.0586972	0.049	0.019	0.148179
g1624.t1|PTC1-MOUSE	0.222024	0.12	0.075	0.15018
g2385.t1|RPGP2-HUMAN	-0.184189	0.263	0.321	0.150439
g23611.t1|TXD17-PONAB	0.129463	0.294	0.227	0.153843
g8785.t1|ADAS-HUMAN	0.0913409	0.587	0.493	0.159803
g24768.t1|HMCN1-MOUSE	-0.119188	0.048	0.083	0.162493
g23343.t1|GCY-ARBPU	0.0426342	0.035	0.01	0.162588
g19975.t1|Y1199-DICDI	-0.0344097	0.013	0.035	0.164636
g6292.t1|FKB2B-RHIO9	-0.168565	0.121	0.169	0.16635
g13509.t1|TBCB-BOVIN	0.0631446	0.312	0.236	0.169764
g25532.t1|RECK-HUMAN	-0.0526146	0.037	0.069	0.171114
g9167.t1|CAH2-TRIHK	0.115505	0.082	0.043	0.173264
g9100.t1|ACLY-MOUSE	-0.110469	0.062	0.101	0.17637
g19118.t2|LRMP-DANRE	0.0485284	0.034	0.009	0.177496
g23433.t1|PSA4-MOUSE	0.090826	0.526	0.445	0.179192
g27169.t1|TKTL2-MOUSE	0.102892	0.25	0.186	0.185019
g11093.t1|ASAP1-MOUSE	0.0912065	0.113	0.066	0.188119
g9666.t1|PSA5-MOUSE	0.0789132	0.531	0.444	0.193634
g15029.t1|1433-DICDI	0.0705454	0.132	0.082	0.194042
g10380.t1|CDN1C-MOUSE	0.122387	0.421	0.347	0.197486
g24973.t1	0.0316005	0.045	0.016	0.197787
g552.t1	0.0313771	0.023	0.003	0.198218
g21206.t1|K0556-MOUSE	0.0744402	0.073	0.036	0.203803
g8261.t1|NMD3-MOUSE	-0.167027	0.377	0.431	0.209206
g33656.t1|GALE-DICDI	0.0452091	0.193	0.131	0.210684
g19632.t1|CLR4-SCHPO	-0.0859013	0.059	0.097	0.220191
g4035.t1|ARD1-UROFA	0.0801228	0.217	0.153	0.220954
g11559.t1|NDUF4-PONAB	0.0753561	0.119	0.072	0.222352
g32341.t1|ENAH-HUMAN	0.109696	0.322	0.252	0.222795
g3659.t1|TIAR-HUMAN	0.0998015	0.769	0.725	0.229409
g20571.t1|TMED-NEMVE	-0.208583	0.592	0.616	0.231402
g8528.t1|HS902-HUMAN	0.111174	0.867	0.824	0.242425
g2575.t1|NR1AA-DANRE	0.0680862	0.264	0.195	0.248848
g18200.t1|RIT2-HUMAN	-0.170932	0.413	0.464	0.248982
g21685.t1|KLF8-HUMAN	0.118268	0.393	0.32	0.251809
g30605.t1|CHST3-CHICK	0.031633	0.032	0.008	0.257394
g1715.t1|ELOV4-HUMAN	-0.107108	0.02	0.044	0.26167
g30412.t1|CASR-RAT	-0.0501739	0.024	0.05	0.262033
g33393.t1	0.1037	0.469	0.396	0.266839
g8415.t1	0.0866675	0.284	0.215	0.28159
g24600.t1|RNF41-PONAB	0.0343198	0.095	0.052	0.286171
g26767.t1|GPX5-PIG	0.161806	0.328	0.258	0.291498
g28134.t1|ENPP7-RAT	0.0432152	0.13	0.081	0.294148
g2021.t1|TYB-CAEEL	0.108388	0.691	0.607	0.295008
g2357.t1|LOXH1-MOUSE	0.078573	0.075	0.038	0.299834
g3089.t1|ISY1-HUMAN	0.0479222	0.213	0.151	0.301151
g30708.t1|PP2AB-BOVIN	0.106015	0.617	0.545	0.31046
g9912.t1|TBL2-MOUSE	-0.186689	0.572	0.598	0.32154
g6880.t1|DLL1-XENLA	-0.291508	0.293	0.332	0.322715
g7761.t1|JARD2-HUMAN	0.0374257	0.044	0.016	0.328717
g23467.t1|CBPD-HUMAN	-0.131177	0.133	0.181	0.328903
g30496.t1|MMAA-MOUSE	0.0882322	0.143	0.092	0.329599
g6228.t1|NAS6-CAEEL	0.227374	0.057	0.025	0.337703
g18852.t1|SHOC2-NEMVE	0.0947991	0.213	0.154	0.340077
g16651.t1|CHM1A-MOUSE	0.0800442	0.149	0.097	0.342085
g30505.t1|RS27L-BOVIN	-0.0723737	0.975	0.985	0.345862
g9063.t1|FLVC2-HUMAN	-0.0811457	0.081	0.124	0.346147
g22798.t1|TU92-POLAB	-0.371213	0.356	0.381	0.346162
g33318.t1|TCP4-DROME	0.0936566	0.316	0.244	0.350434
g15343.t1	0.0359297	0.02	0.002	0.356334
g21804.t1|PGBM-HUMAN	0.176785	0.083	0.046	0.372865
g15094.t1|MAPK5-HUMAN	0.0982357	0.462	0.386	0.376459
g7204.t2|CLAP1-XENTR	-0.180289	0.138	0.185	0.378377
g19978.t1|LPP-RAT	0.11444	0.41	0.333	0.387647
g4608.t1|ABCBA-HUMAN	0.079498	0.469	0.389	0.392621
g3100.t2|INX3-DROME	-0.0198543	0.004	0.018	0.399706
g13722.t1	0.218458	0.231	0.174	0.401439
g32926.t1	0.051886	0.029	0.007	0.401928
g29003.t1|DDX3X-HUMAN	0.0899999	0.218	0.158	0.407853
g5986.t1|PCM1-XENLA	0.101834	0.209	0.151	0.41239
g942.t1|IF172-DANRE	0.0641893	0.047	0.019	0.4192
g17042.t1|AGRG4-HUMAN	0.0303466	0.019	0.002	0.426431
g29481.t1|LENG9-MOUSE	0.0657618	0.167	0.114	0.438354
g20906.t1|SH319-HUMAN	0.1117	0.286	0.22	0.446914
g11680.t1|ARSB-RAT	0.0348883	0.038	0.012	0.44935
g20897.t1|RAB10-PONAB	0.0869391	0.76	0.708	0.464376
g26817.t1|IKKB-HUMAN	0.0718503	0.22	0.159	0.467495
g8146.t1|TEP1-HUMAN	0.0533765	0.235	0.169	0.485356
g8393.t1|SND1-BOVIN	-0.206508	0.488	0.534	0.486949
g46.t1|S2611-HUMAN	0.0464229	0.052	0.022	0.487847
g16536.t1|PIN4-DANRE	0.083861	0.279	0.214	0.488364
g6960.t1|HMGT-ONCMY	-0.11635	0.768	0.788	0.49402
g13730.t1|NCAH-DROME	0.0642575	0.142	0.091	0.526322
g19496.t1|CRIP1-RAT	-0.376124	0.505	0.509	0.5522
g6640.t1	0.0282778	0.017	0.001	0.575147
g4644.t1|SPTC2-MOUSE	0.0990782	0.536	0.46	0.577248
g11353.t1|OTOL1-MOUSE	0.285775	0.276	0.224	0.582353
g10022.t1|UBL7-MOUSE	0.0820193	0.124	0.078	0.58853
g26877.t1|HDC-HUMAN	-0.11134	0.78	0.827	0.598283
g6294.t1|DNMBP-HUMAN	0.0747674	0.183	0.129	0.611298
g15400.t1|SMI20-HUMAN	0.0774252	0.147	0.097	0.617265
g25991.t1|LSM4-MOUSE	0.0786074	0.15	0.1	0.619434
g33139.t1	0.0591828	0.048	0.019	0.623879
g24671.t1|QCR6-HUMAN	0.0946565	0.794	0.741	0.627813
g849.t1|FUCO-BRAFL	0.0541832	0.273	0.205	0.648562
g5180.t1	0.194262	0.578	0.488	0.651188
g7406.t1|RTBS-DROME	-0.169671	0.559	0.601	0.654925
g17589.t1|PKHA1-MOUSE	0.0527021	0.224	0.165	0.674224
g33496.t2|SON-MOUSE	-0.198934	0.243	0.294	0.678758
g10950.t1	-0.0934112	0.312	0.373	0.682018
g20504.t1|LIN41-CHICK	0.0722282	0.211	0.153	0.694167
g7046.t1	0.035485	0.033	0.01	0.699907
g14473.t1	0.0911093	0.091	0.052	0.708812
g15906.t1|ETFA-HUMAN	0.0714247	0.223	0.164	0.742109
g2193.t1	0.0510846	0.076	0.04	0.745574
g33437.t1|PHB2-XENTR	0.124979	0.437	0.369	0.74995
g13905.t1|YH24-CAEEL	0.0897007	0.475	0.402	0.768763
g9425.t2|KCNC1-HUMAN	0.0370119	0.018	0.002	0.784588
g29050.t1|VPS54-DROME	0.0658558	0.189	0.134	0.792154
g33784.t1|DPM1-MOUSE	0.0661513	0.27	0.204	0.793876
g421.t1|RS7-RAT	-0.0817632	0.929	0.935	0.80734
g4294.t1|C1TC-RAT	0.059952	0.176	0.123	0.861951
g9880.t1|PPM1A-BOVIN	0.0874009	0.817	0.765	0.889187
g31055.t1|SNX4-MOUSE	0.0770168	0.285	0.219	0.890084
g15775.t1	0.0240724	0.016	0.001	0.892653
g13370.t1|DNLI4-CHICK	0.0378116	0.071	0.036	0.897879
g26886.t1|RPGR-MOUSE	0.188436	0.9	0.883	0.906924
g9623.t1|AR8BA-DANRE	0.0670055	0.287	0.221	0.92371
g10540.t1|RS3-PIG	-0.0953786	0.912	0.921	0.930783
g8547.t1|STIM2-MOUSE	0.0768269	0.076	0.042	0.946776
g14472.t1|NUDT9-MOUSE	0.0434861	0.02	0.003	0.978053
g7747.t1|SUCO-MOUSE	0.106246	0.204	0.15	1
g3230.t1|FUT11-DANRE	0.0385748	0.031	0.009	1
g10818.t1|PK1L2-MOUSE	0.0365797	0.028	0.007	1
g27787.t1|GSH0-RAT	-0.138943	0.817	0.832	1
g5726.t1|ROCK2-HUMAN	0.0871286	0.33	0.261	1
g28383.t1|CP1A1-ORYLA	-0.0567242	0.052	0.086	1
g10047.t1|RL21A-SCHPO	-0.111846	0.811	0.826	1
g20377.t1	-0.27468	0.469	0.489	1
g21045.t1|BL1S1-MOUSE	0.0679301	0.192	0.137	1
g10622.t1|B4GN4-MOUSE	0.062997	0.088	0.05	1
g18690.t1|TRPA1-HUMAN	0.0326215	0.026	0.006	1
g4007.t1|AVL9-HUMAN	0.0344296	0.06	0.029	1
g17675.t1|SCOC-BRUMA	0.0688943	0.211	0.154	1
g19832.t1	-0.152604	0.056	0.089	1
g10725.t1|ZNT2-MOUSE	0.0620053	0.234	0.174	1
g4324.t1|ARF-CANAL	-0.107891	0.129	0.173	1
g21627.t1|TPIS-XENTR	0.101391	0.489	0.417	1
g33078.t1|RN146-MOUSE	-0.166559	0.32	0.368	1
g949.t1|PKD2-BOVIN	0.158722	0.32	0.263	1
g9730.t1|NAL12-MOUSE	0.0349876	0.03	0.009	1
g27679.t1|LRCH3-HUMAN	0.0456337	0.05	0.022	1
g11030.t1	-0.0178742	0.001	0.009	1
g26427.t1|GRM3-MOUSE	0.378251	0.493	0.439	1
g25017.t1|KCMF1-HUMAN	0.0985652	0.474	0.401	1
g14826.t1	0.0562656	0.042	0.017	1
g1694.t1|CISD3-MOUSE	0.0912915	0.302	0.239	1
g19123.t1|PRC2C-MOUSE	-0.122189	0.743	0.761	1
g9653.t1|FGD6-MOUSE	0.0509361	0.101	0.061	1
g14484.t1	0.0326806	0.033	0.011	1
g28118.t1	-0.0166478	0.002	0.011	1
g270.t1|RLGM2-TRYB2	-0.145687	0.35	0.402	1
g8427.t1|TLL1-XENLA	-0.0346817	0.067	0.105	1
g5519.t1|MRP1-CHICK	0.179871	0.166	0.121	1
g21094.t1|MCAT-HUMAN	0.0938969	0.258	0.198	1
g30873.t1	0.0481262	0.106	0.065	1
g23559.t1|ABR-MOUSE	0.103686	0.188	0.136	1
g14668.t1|DCT2B-XENLA	0.0578667	0.126	0.082	1
g25127.t1|DMTA2-MONAL	-0.0923103	0.04	0.069	1
g537.t1	0.0310791	0.019	0.003	1
g15019.t1|TM7S3-HUMAN	0.0413395	0.038	0.014	1
g17428.t1|PDIP3-MOUSE	0.0872919	0.256	0.195	1
g6547.t1	0.0318646	0.091	0.053	1
g14033.t1|TM104-CHICK	0.0450975	0.06	0.029	1
g6025.t1|CALX-RAT	0.0711214	0.725	0.665	1
g24640.t1|KI21A-MOUSE	0.115018	0.356	0.291	1
g11829.t1|ADDH-SCHPO	-0.0486503	0.108	0.154	1
g11395.t1|GPC6-MOUSE	-0.185644	0.595	0.627	1
g33324.t1	-0.0916943	0.027	0.05	1
g3071.t1	0.0502161	0.16	0.11	1
g17283.t1|RNPS1-PONAB	-0.132728	0.485	0.53	1
g7216.t1|RHG23-HUMAN	-0.122411	0.232	0.287	1
g16211.t1|RL18A-DANRE	-0.101999	0.927	0.93	1
g14821.t1	0.10584	0.118	0.077	1
g24024.t1|ZFN2B-MOUSE	0.131442	0.285	0.225	1
g19687.t1|ATG9A-PONAB	0.0823523	0.124	0.081	1
g4299.t1|MALT1-HUMAN	0.0603917	0.136	0.09	1
g32128.t1|FOSL-DROER	0.114277	0.301	0.24	1
g28828.t1	-0.131064	0.192	0.241	1
g20700.t1|ARRD3-MOUSE	0.0481845	0.175	0.123	1
g15584.t1	0.306742	0.203	0.161	1
g9677.t1	0.0485443	0.122	0.079	1
g26951.t1|EXOS2-BOVIN	0.0576861	0.136	0.09	1
g1460.t1|RIOK3-MOUSE	-0.108985	0.735	0.757	1
g16119.t1|RS5-PODCA	-0.0588428	0.992	0.996	1
g23621.t1|BTBD2-HUMAN	0.105963	0.342	0.281	1
g18523.t1|UGDH-RAT	0.13307	0.514	0.454	1
g28283.t1|EIF3I-NEMVE	-0.115713	0.525	0.578	1
g27419.t1|HUTU-MOUSE	0.0527555	0.123	0.08	1
g33333.t1|EI2BA-PONAB	0.0771567	0.28	0.218	1
g21195.t1|THUM1-BOVIN	-0.106494	0.114	0.156	1
g11799.t2|KCNG2-CHICK	0.0233914	0.013	0	1
g31778.t1|ARSB-RAT	0.0365483	0.044	0.019	1
g4540.t1	0.0407683	0.069	0.036	1
g27171.t1|GMPPB-DROME	0.0564212	0.367	0.301	1
g17636.t1|ANK1-HUMAN	0.0895644	0.203	0.149	1
g20790.t1	-0.0245446	0.005	0.017	1
g33059.t1|AVR2A-BOVIN	0.135369	0.416	0.356	1
g22576.t1|TBK1-XENLA	0.0863088	0.125	0.083	1
g33330.t1	-0.238186	0.049	0.08	1
g11095.t1|GSH1-MOUSE	0.0370561	0.032	0.011	1
g10345.t1|PRRT1-RAT	0.0281997	0.031	0.01	1
g30334.t1|MUC5A-HUMAN	0.030759	0.032	0.011	1
g10953.t1|BAFB-XENLA	0.110885	0.56	0.501	1
g8942.t1|RHBT1-HUMAN	0.0434374	0.16	0.111	1
g23284.t1|CACB2-RABIT	0.191316	0.389	0.332	1
g27172.t1|MED20-XENLA	0.0766871	0.153	0.106	1
g33136.t1	0.0377803	0.132	0.088	1
g27095.t1	0.0370702	0.025	0.006	1
g29626.t1|CUL1-PONAB	0.0717211	0.343	0.276	1
g1971.t1|YK66-SCHPO	-0.059218	0.035	0.061	1
g26121.t1|THIM-MOUSE	0.0771504	0.473	0.394	1
g32278.t1|NOVA1-MACFA	0.102087	0.573	0.507	1
g25253.t1|COX42-THUOB	0.0836548	0.837	0.788	1
g25073.t1|KDM8-SALSA	0.0939615	0.198	0.146	1
g22571.t1|NAPEP-BOVIN	0.112523	0.928	0.938	1
g4976.t1|CUBN-HUMAN	0.322037	0.117	0.081	1
g17982.t1|CRYAB-BOVIN	0.0864028	0.331	0.267	1
g32882.t1|GRM8-HUMAN	-0.030681	0.02	0.042	1
g23173.t1|ALG2-HUMAN	0.0546814	0.126	0.083	1
g15396.t1|TRM7-HUMAN	-0.13998	0.304	0.349	1
g23088.t1|MA1B1-MOUSE	0.074449	0.363	0.297	1
g834.t1|ETFD-MOUSE	0.089783	0.179	0.131	1
g21408.t1|LCAP-MOUSE	0.0564413	0.098	0.06	1
g14851.t1|PSMD8-PONAB	0.0695916	0.43	0.368	1
g431.t1	0.0876151	0.263	0.202	1
g19686.t1|ZNFX1-MOUSE	0.0931269	0.21	0.159	1
g848.t1|FUCO-RAT	0.0553529	0.101	0.063	1
g21076.t2|KIBRA-XENTR	0.0843889	0.165	0.117	1
g26429.t1|TDRD3-CHICK	0.0991236	0.339	0.273	1
g29942.t1|ENY2-XENTR	0.0638875	0.164	0.115	1
g22691.t1|TF3C1-HUMAN	0.0451913	0.082	0.048	1
g2112.t1|ICEF1-RAT	0.242995	0.357	0.303	1
g30001.t1|DPY30-HUMAN	0.0841144	0.554	0.5	1
g4669.t1|RBMX-DANRE	0.0903657	0.551	0.482	1
g3448.t1|SPRTN-XENTR	0.0852621	0.163	0.116	1
g26798.t1|OXIR-STRLI	-0.0259923	0.01	0.025	1
g31447.t1|LRC26-MOUSE	0.0444666	0.101	0.063	1
g25771.t1|ANTA-HYDVU	0.108113	0.035	0.013	1
g27978.t1|BUD31-BRABE	0.0610524	0.438	0.366	1
g26104.t1|USPAL-ARATH	0.0588916	0.439	0.37	1
g27449.t1|6PGL-HUMAN	0.093435	0.245	0.189	1
g3625.t1	0.0428084	0.042	0.018	1
g7057.t1|NDUA5-BOVIN	0.0954582	0.57	0.511	1
g19274.t1|MYO5A-MOUSE	0.0651323	0.13	0.087	1
g7726.t1|DYNA-DICDI	0.0459972	0.152	0.105	1
g20082.t1|VPS4A-RAT	0.0611265	0.468	0.396	1
g1215.t1|KMT2E-HUMAN	0.0117208	0.188	0.135	1
g25730.t1|MVP-STRPU	0.0498249	0.18	0.129	1
g30207.t1|NEC1-RAT	0.0727026	0.159	0.112	1
g8032.t1|PRP31-XENTR	0.102459	0.408	0.344	1
g24337.t1|KBP-CHICK	0.0632039	0.2	0.148	1
g24997.t1|CNNM2-RAT	0.199644	0.177	0.13	1
g14377.t1	-0.0377403	0.042	0.071	1
g20727.t1|TTC28-HUMAN	0.0701301	0.093	0.058	1
g28009.t1|UBS3A-DROME	0.0400282	0.248	0.188	1
g31242.t1|NADA-APLCA	0.159163	0.148	0.106	1
g24686.t1|F173B-HUMAN	0.0511438	0.175	0.126	1
g14752.t1|SPTN1-HUMAN	0.0602347	0.063	0.034	1
g26777.t1|CN159-MOUSE	0.0165985	0.014	0.001	1
g33280.t1|MP2K2-CHICK	0.0555241	0.221	0.167	1
g28716.t1	0.0794687	0.143	0.098	1
g31408.t1|BCAP-HUMAN	0.0958576	0.072	0.042	1
g22635.t1|IVD-CAEEL	0.0564728	0.12	0.079	1
g11703.t1|RWDD4-HUMAN	-0.171125	0.345	0.389	1
g25033.t1|PGDH-BOVIN	-0.041449	0.034	0.059	1
g19444.t1|NDUS8-MOUSE	0.0671082	0.595	0.522	1
g2980.t1	0.0256631	0.031	0.011	1
g143.t1|P4HTM-MOUSE	0.0340106	0.022	0.005	1
g21012.t1	-0.0447713	0.017	0.035	1
g16157.t1	-0.461185	0.469	0.458	1
g6653.t1|ADA10-BOVIN	0.11723	0.574	0.512	1
g20832.t1|DMBT1-RABIT	-0.0686121	0.014	0.032	1
g26219.t1|PRLD1-CHICK	0.020825	0.059	0.03	1
g28421.t1	0.0725728	0.187	0.136	1
g10068.t1|USPAL-ARATH	0.0684555	0.224	0.172	1
g28793.t1|TEP1-HUMAN	0.0266327	0.048	0.022	1
g14936.t1|LC7L3-MOUSE	0.0798865	0.568	0.5	1
g25415.t1|CCKAR-CAVPO	0.0267909	0.022	0.005	1
g698.t1|ARGLA-DANRE	0.0928272	0.389	0.322	1
g19818.t1|PGDH-HUMAN	-0.102567	0.126	0.171	1
g24513.t1|GSH1-MOUSE	0.0767791	0.135	0.093	1
g31385.t1|AUR1-SCHPO	0.0720004	0.389	0.326	1
g6856.t1|SPG20-BOVIN	0.0885359	0.264	0.206	1
g7860.t1|ITA9-HUMAN	0.104366	0.394	0.331	1
g17284.t1|LENG8-DANRE	0.0914823	0.359	0.294	1
g2288.t1	-0.0333582	0.062	0.096	1
g8281.t1|NOSIP-XENTR	0.0845978	0.415	0.347	1
g13759.t1|SSRG-HUMAN	-0.115701	0.849	0.844	1
g15129.t1|NLTP-MOUSE	0.0698311	0.185	0.135	1
g16071.t1|ALA7-ARATH	0.068956	0.302	0.243	1
g24018.t1|VPS35-MOUSE	0.0742569	0.274	0.216	1
g14257.t1|HEAT1-HUMAN	-0.0703631	0.09	0.128	1
g19249.t1	0.0561026	0.019	0.004	1
g33128.t1|ZRAB2-PIG	0.0456688	0.1	0.063	1
g24122.t1|SAM14-MOUSE	0.0174126	0.019	0.004	1
g4295.t1|PTN21-HUMAN	0.0319521	0.028	0.009	1
g15108.t1|SAX-LITCT	0.0231404	0.015	0.002	1
g32151.t1	0.0396639	0.032	0.012	1
g16634.t1|VP9D1-MOUSE	0.0641624	0.144	0.1	1
g8268.t1|LIAS-BOVIN	0.0319658	0.124	0.082	1
g31531.t1|MY18A-HUMAN	0.0396425	0.093	0.058	1
g19870.t1|CALM-SOLLC	0.032326	0.017	0.003	1
g7503.t2|HXK2-DROME	0.0719828	0.34	0.275	1
g8514.t1|ZMAT2-MOUSE	0.0769181	0.476	0.421	1
g5846.t1|ALPL-ARATH	0.0642762	0.103	0.066	1
g12891.t1|PDCL3-RAT	0.0949788	0.496	0.426	1
g15070.t1|COQ3-RAT	0.0430026	0.065	0.035	1
g21690.t1|PTBP3-HUMAN	0.0985927	0.804	0.758	1
g27472.t1|ATPG-BOVIN	0.0564864	0.836	0.808	1
g32867.t3|KI13A-MOUSE	0.0869222	0.225	0.173	1
g10117.t1	0.087317	0.197	0.15	1
g4671.t1|RHG05-MOUSE	0.0700887	0.162	0.116	1
g14286.t1|DYST-HUMAN	0.0743464	0.271	0.213	1
g4714.t1|TSR3-HUMAN	0.0758139	0.167	0.12	1
g24508.t1|S2535-DANRE	0.0330996	0.058	0.03	1
g12971.t1	0.167703	0.445	0.385	1
g10209.t1|OPN4A-GADMO	0.0392974	0.018	0.004	1
g16835.t1|KAD7-HUMAN	-0.0561405	0.028	0.05	1
g11781.t1|TAB1-HUMAN	0.0376104	0.082	0.049	1
g33397.t1|ASGL1-RAT	0.0513216	0.308	0.244	1
g984.t1|RBM42-XENLA	0.0566944	0.446	0.376	1
g27058.t1|INP4A-MOUSE	0.0414997	0.158	0.112	1
g23312.t1|LDB3-MOUSE	-0.100035	0.898	0.886	1
g15737.t1|HS3S1-HUMAN	0.0710611	0.16	0.115	1
g10594.t1|XBP1-MOUSE	0.10339	0.668	0.612	1
g11569.t1|FAT4-MOUSE	0.0225816	0.015	0.002	1
g19918.t1|RL32-RAT	-0.0487607	0.983	0.981	1
g18249.t1|MTAP-XENTR	0.0783113	0.235	0.183	1
g30248.t1	0.0786446	0.337	0.277	1
g12790.t1|CNOT2-HUMAN	0.0622721	0.149	0.105	1
g18959.t1|LRBA-MOUSE	0.0543587	0.071	0.041	1
g29856.t1|PCY2-HUMAN	0.106592	0.476	0.413	1
g11984.t1|FAD1-MOUSE	-0.0439682	0.049	0.078	1
g28308.t1	0.0472965	0.13	0.089	1
g25961.t1|ZC11A-MOUSE	0.072662	0.171	0.125	1
g26917.t1|AHNK-HUMAN	0.0391345	0.068	0.038	1
g23098.t2|HPS5-MOUSE	0.0393782	0.066	0.037	1
g18488.t1|FORF-DICDI	0.137113	0.178	0.137	1
g6068.t1|DLDH-PIG	0.0843181	0.614	0.571	1
g15629.t1|TNR16-CHICK	0.0931493	0.422	0.364	1
g5737.t1|TXND-THEPA	-0.110181	0.151	0.194	1
g25866.t1|TPM1-PODCA	-0.159969	0.825	0.823	1
g26287.t1|2A5D-RABIT	0.0716908	0.385	0.317	1
g5405.t1|SODM-MACFA	0.0979868	0.668	0.607	1
g5004.t1|RTXE-DROME	0.0859782	0.19	0.143	1
g18811.t1|ASF1B-MOUSE	0.0694942	0.134	0.093	1
g12581.t1|SYAC-HUMAN	-0.16679	0.306	0.349	1
g26799.t1|OXIR-STRAT	-0.0343579	0.019	0.038	1
g10915.t1|BCAT1-MOUSE	0.0394501	0.016	0.003	1
g12963.t1|ALR-MOUSE	0.0550728	0.142	0.1	1
g3346.t1	0.0335441	0.028	0.01	1
g19291.t1|ACE-RAT	0.0213156	0.028	0.01	1
g30198.t1|FEN1-AEDAE	0.0351735	0.055	0.028	1
g29299.t1|LMAN1-MOUSE	0.0744224	0.162	0.119	1
g10316.t1|ABCE1-MOUSE	-0.096582	0.588	0.629	1
g23498.t1|TI10A-XENLA	0.0624835	0.142	0.1	1
g21637.t1	0.0398103	0.129	0.089	1
g14725.t1|CYBP-BOVIN	-0.119316	0.667	0.697	1
g23911.t1|GRAN-MOUSE	0.0835824	0.454	0.393	1
g2266.t1	0.048069	0.025	0.008	1
g20648.t1|AB17C-CHICK	0.0300386	0.11	0.074	1
g4618.t1|ZNF84-HUMAN	0.0258522	0.044	0.02	1
g26882.t1|RGS10-BOVIN	0.0519339	0.122	0.083	1
g28642.t1|FUT10-XENLA	-0.0510884	0.012	0.027	1
g30768.t1	0.0140502	0.011	0	1
g16162.t1|VPS52-RAT	0.0415624	0.042	0.019	1
g7086.t1|AT8B2-HUMAN	-0.190361	0.248	0.285	1
g23252.t1|CRCM-HUMAN	0.0527263	0.133	0.093	1
g6284.t1	0.0282768	0.042	0.019	1
g25137.t1|NPT2A-RABIT	0.0254267	0.053	0.027	1
g24674.t1|QORX-HUMAN	0.0408836	0.194	0.146	1
g3846.t1|TALD3-CHICK	0.072479	0.121	0.082	1
g23140.t1|ODO1-HUMAN	0.0893464	0.206	0.159	1
g30425.t1|HIF1A-CHICK	0.137829	0.528	0.471	1
g30941.t1|SYT11-HUMAN	-0.0663381	0.055	0.084	1
g26855.t1|TECR-HUMAN	0.0893641	0.573	0.503	1
g21417.t1|RBG3-ARATH	0.0673008	0.263	0.209	1
g4930.t1	0.0846288	0.428	0.368	1
g26550.t1|MEGF6-MOUSE	0.0382499	0.029	0.011	1
g11950.t1|SIK2-MOUSE	0.0556975	0.248	0.196	1
g20096.t1	0.0791024	0.183	0.139	1
g30478.t1|SMAD4-PIG	0.0310624	0.03	0.012	1
g5276.t1|SRPRA-MOUSE	-0.123523	0.519	0.558	1
g5403.t1|B4GN4-HUMAN	0.0097251	0.4	0.327	1
g24698.t1|COG1-MOUSE	0.0277091	0.09	0.057	1
g9794.t1	0.0801034	0.601	0.534	1
g27456.t1|RAP1-CAEEL	-0.130655	0.805	0.827	1
g15360.t1|ATF6B-HUMAN	0.0506907	0.17	0.125	1
g30577.t1|NDUA6-BOVIN	0.0616975	0.503	0.437	1
g11206.t2|GEFY-DICDI	0.0339973	0.039	0.018	1
g7038.t1|PIAS2-RAT	0.0302189	0.064	0.036	1
g1766.t1|CAB39-MOUSE	0.0852776	0.186	0.142	1
g29352.t1	0.0161812	0.01	0	1
g12806.t1|PHB2-XENTR	0.0601223	0.341	0.28	1
g2105.t1|UPP-MOUSE	0.0772612	0.405	0.343	1
g142.t1|P4HTM-HUMAN	0.0208932	0.014	0.002	1
g463.t1|FABG-THEMA	0.03857	0.323	0.262	1
g2481.t1|MED8-DANRE	0.0529194	0.103	0.068	1
g15365.t1	0.0614086	0.169	0.124	1
g23274.t1	0.083166	0.49	0.43	1
g17774.t1|RETST-DANRE	0.0325255	0.09	0.057	1
g6375.t1|RGS2-BOVIN	0.0298686	0.025	0.008	1
g33146.t1|S22A3-HUMAN	0.0477616	0.034	0.014	1
g10410.t1|SCRIB-DANRE	0.0906102	0.361	0.306	1
g1519.t1|KTNA1-STRPU	0.0563595	0.199	0.152	1
g26703.t3	0.0918764	0.288	0.235	1
g6840.t1|HSP70-HYDVU	0.0800486	0.909	0.909	1
g5528.t1	0.0437787	0.312	0.254	1
g32869.t1|LRRC9-MOUSE	0.0710116	0.124	0.088	1
g27364.t1|PANG1-DROME	0.130542	0.356	0.302	1
g5153.t1|ARHGI-HUMAN	0.0941317	0.161	0.12	1
g10255.t1|GABR2-MOUSE	-0.0278504	0.006	0.017	1
g20428.t1|VMO1-CHICK	0.050512	0.012	0.001	1
g8468.t1|PA2A2-HELSU	0.0437817	0.113	0.075	1
g17796.t1|NAS13-CAEEL	0.0969544	0.032	0.013	1
g12560.t1|CAZA2-ECHTE	0.032765	0.051	0.027	1
g2954.t1|CLAT-RAT	-0.141547	0.077	0.107	1
g3050.t1|SAMC-DROME	0.0299798	0.034	0.014	1
g28253.t1	0.107725	0.168	0.127	1
g6018.t1	0.0873822	0.266	0.213	1
g2944.t1|TC1DB-XENLA	-0.0332599	0.019	0.037	1
g3247.t1|TMOD1-BOVIN	0.0928937	0.539	0.476	1
g15789.t1|FGFR1-XENLA	0.0137089	0.01	0	1
g18019.t1|PUR9-HUMAN	0.0572023	0.107	0.072	1
g25860.t1|KTAP2-IXOSC	-0.146008	0.529	0.556	1
g11861.t1|CDK9-CHICK	0.0461958	0.245	0.191	1
g31925.t1|FAAA-BOVIN	0.0524139	0.145	0.104	1
g21241.t1|TF3C6-MOUSE	0.0259645	0.179	0.132	1
g29803.t1|6PGD-HUMAN	0.0765825	0.263	0.212	1
g2666.t1|TFE2-RAT	0.0456504	0.186	0.141	1
g3900.t1|SRSF7-HUMAN	0.0917354	0.768	0.725	1
g2699.t1|AT1A-HYDVU	0.0403063	0.037	0.017	1
g24335.t1|GA2L1-HUMAN	0.0917009	0.169	0.126	1
g15774.t1|P2RX4-RAT	-0.0326968	0.017	0.034	1
g11363.t1|CBS-HUMAN	0.0548955	0.037	0.017	1
g28307.t1|YPT1-NEUCR	0.0730236	0.156	0.115	1
g13365.t1|DNLI4-PONAB	0.06319	0.193	0.147	1
g9641.t1|RTCB-BOVIN	0.0501933	0.123	0.086	1
g15830.t1|PDIA3-PONAB	-0.0902778	0.72	0.764	1
g24624.t1	0.0645973	0.224	0.175	1
g13516.t1|AUHM-HUMAN	0.0876373	0.402	0.344	1
g8301.t1	0.0358079	0.017	0.004	1
g27315.t1|COPD-MOUSE	-0.141288	0.591	0.617	1
g12877.t1	0.0372467	0.044	0.022	1
g3328.t1|LTBP1-MOUSE	0.0276521	0.028	0.011	1
g32438.t1|ARHG7-RAT	0.0449669	0.129	0.089	1
g887.t1|RT31-MOUSE	0.0284559	0.095	0.062	1
g24823.t1|PLK1-RAT	0.0389329	0.05	0.027	1
g12532.t2|EP15R-HUMAN	0.0500424	0.346	0.289	1
g12747.t1|CAR11-HUMAN	-0.0606405	0.151	0.196	1
g16327.t1|BPNT1-HUMAN	0.0575998	0.137	0.098	1
g8029.t1|LIPT-MOUSE	0.0434184	0.063	0.036	1
g19421.t1|TIF1B-RAT	0.0618572	0.111	0.076	1
g28791.t1	0.013767	0.013	0.002	1
g130.t1|LTAA-AERJA	0.0245779	0.08	0.05	1
g18573.t1|HYD-DROME	0.0514278	0.158	0.116	1
g5987.t1	0.0336662	0.058	0.033	1
g21805.t1|ATS9-HUMAN	0.145593	0.073	0.046	1
g17635.t1|TRPA1-CAEEL	0.0218963	0.05	0.027	1
g31730.t1|SPG7-MOUSE	0.0534067	0.099	0.066	1
g21990.t1|CCD40-HUMAN	0.0681788	0.069	0.042	1
g28675.t1|NELFE-MOUSE	0.0659342	0.195	0.15	1
g30254.t1|ODPA-CAEEL	0.0678081	0.553	0.489	1
g24257.t1	0.050356	0.21	0.163	1
g18167.t1|MYO3A-HUMAN	0.0201967	0.063	0.036	1
g10650.t1|YQK1-SCHPO	-0.0472527	0.084	0.117	1
g14978.t1	0.137766	0.128	0.095	1
g14876.t1|AGM1-PIG	0.0519505	0.137	0.098	1
g23103.t1	-0.0785129	0.109	0.146	1
g23946.t1|DNJB9-MOUSE	0.0450674	0.245	0.192	1
g24909.t1|DERL2-PONAB	0.0401699	0.236	0.186	1
g25588.t1|RPR1A-CHICK	0.0693058	0.232	0.184	1
g29662.t1|CE164-HUMAN	0.0115331	0.136	0.097	1
g6173.t1|PCKGM-MOUSE	-0.127096	0.853	0.848	1
g15272.t1|XPF-CRIGR	0.0398975	0.072	0.044	1
g22539.t1|S61A2-MOUSE	-0.146384	0.683	0.701	1
g31249.t1|NADA-APLKU	0.0124562	0.015	0.003	1
g13103.t1|AT1A-HYDVU	0.0234094	0.022	0.007	1
g16861.t1|Y2R2-DROME	0.0457609	0.111	0.076	1
g19754.t1|RPTOR-HUMAN	0.033315	0.025	0.009	1
g22562.t1|ABCD1-HUMAN	-0.0558176	0.075	0.105	1
g29711.t1|DPH7-HUMAN	0.0586198	0.275	0.222	1
g29971.t1|PRS10-MOUSE	0.0456164	0.329	0.266	1
g32246.t1	0.0271565	0.033	0.014	1
g8459.t1|HECW1-HUMAN	0.0546145	0.078	0.049	1
g29480.t1|YJBM-BACSU	-0.0321245	0.007	0.019	1
g24152.t1|SPAT5-MOUSE	-0.06735	0.961	0.957	1
g6992.t1|SPS1-DROME	0.0538774	0.318	0.267	1
g5239.t1	-0.00395598	0	0.004	1
g12069.t1	-0.0120665	0	0.004	1
g4662.t1|PSDE-DROME	0.0546446	0.327	0.272	1
g18937.t1|PWP1-BOVIN	-0.0943546	0.307	0.353	1
g13733.t1|IWS1-RAT	0.0373611	0.03	0.012	1
g3668.t1|STX17-HUMAN	0.0629392	0.142	0.104	1
g10789.t1|TITIN-HUMAN	0.0362788	0.06	0.035	1
g10312.t1	0.128717	0.079	0.051	1
g22187.t1|LYPA1-RABIT	0.0604038	0.273	0.221	1
g18960.t1|TM258-MOUSE	-0.104884	0.8	0.803	1
g19501.t1|Y1388-SYNY3	0.0703739	0.821	0.785	1
g24812.t1|PPR21-HUMAN	-0.0571168	0.072	0.102	1
g24903.t1|NECA-HYDVU	0.0490758	0.039	0.019	1
g10365.t1|RBL2A-PONAB	0.0600741	0.237	0.189	1
g9957.t1|TF3C3-HUMAN	0.0387023	0.294	0.238	1
g6953.t1|STRUM-MOUSE	0.0404423	0.085	0.055	1
g19252.t1|Y1101-SYNY3	0.0955581	0.36	0.301	1
g12040.t1	0.0218629	0.023	0.008	1
g18880.t1|RPN1-PONAB	-0.105875	0.402	0.442	1
g30489.t1|DC1I2-MOUSE	0.0384133	0.337	0.279	1
g25126.t1|PA2B-BUNFA	-0.0699315	0.183	0.229	1
g31626.t1	0.467528	0.662	0.616	1
g13371.t1	0.0900272	0.684	0.663	1
g14470.t1|MMP14-MOUSE	0.024505	0.011	0.001	1
g32596.t1	0.0263672	0.078	0.049	1
g4856.t1|IP6K1-RAT	0.0750052	0.232	0.184	1
g1952.t1|MA1A2-MOUSE	0.0706103	0.55	0.488	1
g26482.t1|BTAF1-HUMAN	-0.102849	0.115	0.149	1
g29567.t1|FUCTA-DROME	-0.213906	0.322	0.352	1
g18438.t1|BCOR-HUMAN	0.0428352	0.161	0.12	1
g10721.t1	0.0194657	0.297	0.24	1
g11996.t2|TM175-DANRE	0.0571628	0.151	0.11	1
g29455.t1|ZRAN1-HUMAN	0.0879214	0.236	0.192	1
g21670.t1|ZFAN6-PONAB	0.0603586	0.89	0.88	1
g30446.t1|FBP1-STRPU	-0.0501831	0.109	0.145	1
g15640.t1|ZIC2B-XENLA	0.162565	0.158	0.122	1
g1207.t1|TM175-DANRE	-0.0960003	0.112	0.149	1
g30230.t1|OPLA-HUMAN	0.0327244	0.107	0.074	1
g30863.t1|CHMP3-XENTR	0.0340542	0.108	0.074	1
g5799.t1|RNF4-HUMAN	0.0475091	0.12	0.085	1
g15644.t1|CYP5-CAEEL	0.151507	0.833	0.78	1
g8219.t1|MOB1B-MOUSE	0.0308317	0.062	0.036	1
g3412.t1	-0.0132533	0.113	0.152	1
g25773.t1|ANTA-HYDVU	0.0695772	0.024	0.009	1
g33091.t1	0.0516634	0.075	0.047	1
g3130.t1|TM9S2-MOUSE	0.030413	0.168	0.126	1
g15146.t1|UBP48-CHICK	0.0565925	0.22	0.175	1
g13533.t1|DDX43-HUMAN	-0.0954666	0.15	0.19	1
g21784.t1	-0.0396978	0.015	0.03	1
g27986.t1|MCLN1-MOUSE	0.0671527	0.143	0.105	1
g19276.t1|ETFB-HUMAN	0.0687943	0.562	0.492	1
g20461.t1|RMP-HUMAN	0.0641056	0.19	0.145	1
g14878.t1|EPN4-HUMAN	0.0766277	0.296	0.245	1
g32018.t1|STX1A-DROME	0.0500514	0.473	0.407	1
g27365.t1|RNLS-MOUSE	0.0337511	0.081	0.052	1
g32877.t1|BMP7-MOUSE	-0.0390146	0.065	0.095	1
g26570.t1|LAC2-BOTFU	-0.0382935	0.01	0.023	1
g12219.t1|CCD22-NEMVE	0.0715044	0.256	0.205	1
g23366.t1|NALD2-MOUSE	-0.0129644	0.005	0.014	1
g13800.t1|GBB1-DANRE	0.0476024	0.139	0.102	1
g19163.t1|ODBB-BOVIN	0.00831941	0.104	0.071	1
g16796.t1|DMXL1-HUMAN	0.0254442	0.192	0.147	1
g11305.t1|PCBP3-HUMAN	0.0386638	0.508	0.448	1
g29409.t1|HTXA-PSEST	0.0598668	0.06	0.035	1
g10850.t1	-0.159369	0.099	0.128	1
g1014.t1|TGS1-RAT	0.0372025	0.07	0.043	1
g21130.t1|TRABD-MOUSE	0.0352128	0.187	0.144	1
g30211.t1|FURIN-MOUSE	0.041824	0.164	0.123	1
g15443.t1|MIC10-MOUSE	0.0449466	0.133	0.097	1
g4822.t1|NFYC-PONAB	0.0364211	0.042	0.021	1
g19322.t1|RRAGB-RAT	0.0795393	0.182	0.141	1
g4921.t1	0.0199564	0.012	0.002	1
g15982.t1|OARD1-MOUSE	0.0270474	0.259	0.207	1
g27266.t1|LRC58-HUMAN	0.0591329	0.256	0.205	1
g1199.t1|BP10-PARLI	0.0190036	0.009	0	1
g5527.t1|LSM1-HUMAN	0.0424235	0.272	0.221	1
g33410.t1|LAR4B-MOUSE	0.0655816	0.15	0.113	1
g17602.t1|PWP2B-HUMAN	0.0370519	0.103	0.071	1
g29425.t1|RTJK-DROFU	0.0896543	0.185	0.145	1
g19886.t1|SYTL3-MOUSE	-0.112199	0.368	0.408	1
g4615.t1|CHI1-RHIOL	0.163302	0.19	0.156	1
g25066.t1|INF2-MOUSE	0.0436795	0.036	0.018	1
g23499.t1|GXN-ACRMI	-0.0820438	0.183	0.227	1
g15842.t1|MSRB-METBF	0.0369795	0.068	0.042	1
g27340.t1|RAP2B-RAT	0.0783536	0.417	0.362	1
g7672.t1|PKHL1-HUMAN	0.0283762	0.018	0.005	1
g20340.t1	0.238051	0.313	0.256	1
g29421.t1|CRK-XENLA	0.0309116	0.081	0.052	1
g7743.t1|HCDH-PIG	0.0874528	0.563	0.511	1
g856.t1|ENDUB-DANRE	0.0599029	0.506	0.462	1
g14256.t1|HEAT1-HUMAN	-0.0417609	0.036	0.058	1
g21531.t1|PRS7-MACFA	0.0546867	0.185	0.143	1
g27236.t1|TISB-MOUSE	0.0579195	0.408	0.349	1
g3958.t1|LRRK2-MOUSE	0.0288388	0.023	0.008	1
g23260.t1|LITAF-CHICK	0.03567	0.105	0.073	1
g27175.t1	0.024989	0.021	0.007	1
g2004.t1|RHOAA-DANRE	0.122676	0.57	0.519	1
g27345.t1|CASP3-SAIBB	-0.161826	0.113	0.143	1
g23224.t1|MVD1-MOUSE	0.0457469	0.128	0.092	1
g22558.t1|ZRC1-YEAST	0.0356957	0.113	0.08	1
g10933.t1|ST38L-HUMAN	0.0362681	0.102	0.07	1
g15320.t1|TM38B-DANRE	0.0449236	0.093	0.064	1
g20690.t1|ARRD3-RAT	-0.137998	0.143	0.175	1
g22695.t1	0.120138	0.103	0.074	1
g3892.t1|GABT-HUMAN	0.0670872	0.084	0.056	1
g5752.t1|NUP88-RAT	0.0442978	0.17	0.131	1
g597.t1|PARP4-HUMAN	0.030972	0.097	0.066	1
g9903.t1|RBM19-HUMAN	-0.103655	0.273	0.318	1
g17041.t2|SGS4-DROME	0.0329777	0.012	0.002	1
g24049.t1|COCA1-CHICK	0.0132063	0.008	0	1
g7637.t1|PKHM1-MOUSE	0.0316715	0.031	0.014	1
g865.t1|RB15B-MOUSE	0.0268246	0.185	0.143	1
g30372.t1|TTC19-RAT	0.0711748	0.221	0.176	1
g19892.t1|ANK3-HUMAN	0.0154916	0.169	0.127	1
g4561.t1|PLRG1-HUMAN	0.051975	0.534	0.474	1
g18446.t1|KAT7-HUMAN	0.0346607	0.449	0.376	1
g2690.t1|MCMD2-HUMAN	0.0226784	0.019	0.006	1
g32356.t1|LYST-BOVIN	0.0383607	0.034	0.016	1
g32691.t1|ANM7-BOVIN	0.0428351	0.24	0.192	1
g13142.t1|VATA-MANSE	0.0700871	0.494	0.435	1
g28984.t1|CBX5-MOUSE	-0.136718	0.562	0.585	1
g14873.t1	0.0178271	0.022	0.008	1
g16546.t1|CE162-DANRE	0.0323074	0.081	0.053	1
g33758.t1|PQBP1-BOVIN	0.0599864	0.355	0.299	1
g32577.t1|CA2D1-HUMAN	0.0468528	0.166	0.126	1
g10420.t1|SCRIB-HUMAN	0.03211	0.104	0.073	1
g20715.t1	-0.0768954	0.133	0.17	1
g14867.t1|MIOX-DANRE	0.052798	0.079	0.051	1
g1304.t1	0.0335789	0.314	0.26	1
g12183.t1|CNDP2-MOUSE	0.0599693	0.15	0.113	1
g18152.t1|UB2E2-HUMAN	0.0723117	0.362	0.313	1
g5316.t1|COG3-MOUSE	0.0837225	0.217	0.174	1
g11272.t1	0.0354419	0.036	0.018	1
g12316.t2|RBM39-PONAB	0.0351226	0.308	0.255	1
g31999.t1|I4E3B-XENLA	0.0699238	0.144	0.108	1
g22277.t1|STING-NEMVE	0.0569602	0.161	0.122	1
g22612.t1|AR1-XENLA	0.0383063	0.106	0.074	1
g33217.t1	0.0162177	0.013	0.003	1
g3473.t3|SCAM1-RAT	0.0607706	0.137	0.102	1
g530.t1|GUS-DROME	-0.140763	0.302	0.335	1
g430.t1|MTHFS-RABIT	0.0379899	0.068	0.043	1
g10804.t1|GCH1-CAEEL	0.0485408	0.084	0.056	1
g3713.t2|HMCN2-HUMAN	0.0166096	0.012	0.002	1
g29728.t1|CSPP1-MOUSE	0.0538303	0.109	0.077	1
g12264.t1|CLCA-MOUSE	0.075451	0.293	0.243	1
g29286.t1|SETX-HUMAN	0.0797389	0.164	0.128	1
g23435.t1|S2611-HUMAN	-0.0861996	0.029	0.048	1
g10145.t1|RUSD4-HUMAN	0.0497173	0.11	0.079	1
g15355.t2|MUT7-HUMAN	0.0373087	0.085	0.057	1
g23692.t1|NPRL3-MOUSE	0.0987066	0.21	0.168	1
g25321.t1	0.0367295	0.097	0.067	1
g1484.t1|TDRKH-HUMAN	0.0376944	0.125	0.09	1
g7982.t1|D39U1-BOVIN	0.066491	0.229	0.186	1
g33018.t1|H2AZ-CHICK	-0.0837344	0.104	0.136	1
g5354.t1|G6PT3-DANRE	0.0379881	0.063	0.039	1
g5152.t1|ARG28-HUMAN	0.0474185	0.136	0.101	1
g9989.t1|HCD2-HUMAN	0.0699036	0.347	0.297	1
g10649.t1|PDE11-DROME	0.036739	0.1	0.069	1
g3688.t1|PSME4-HUMAN	0.0255658	0.023	0.009	1
g4548.t1|IDE-HUMAN	0.0274862	0.034	0.017	1
g13984.t1|SYEP-DROME	0.0232023	0.041	0.021	1
g14889.t1|TOM40-XENLA	0.0717175	0.515	0.469	1
g16799.t2	0.0154001	0.047	0.026	1
g7399.t1	0.0585331	0.128	0.094	1
g30527.t1|CC167-XENTR	0.0446485	0.125	0.091	1
g5967.t1|UBCD1-DROME	0.0654086	0.817	0.785	1
g28166.t1|PFI-PTIFI	-0.0474908	0.041	0.064	1
g2440.t1	0.0227634	0.034	0.017	1
g15605.t1|DHX37-HUMAN	-0.0436509	0.067	0.094	1
g9540.t1|1433G-BOVIN	0.0626199	0.863	0.801	1
g11355.t1|CO4A2-ASCSU	0.262156	0.327	0.298	1
g19347.t1|DCAF8-XENTR	0.0374757	0.07	0.044	1
g3024.t1	-0.0301486	0.01	0.022	1
g941.t1	0.0462665	0.161	0.122	1
g6754.t1	0.126355	0.503	0.456	1
g28832.t1|SDC3-CHICK	-0.0827595	0.815	0.802	1
g15251.t1|IF2P-HUMAN	-0.0708637	0.146	0.182	1
g10253.t1|STK31-MOUSE	-0.0116151	0.027	0.045	1
g18695.t1|Y381-RICFE	0.0222742	0.016	0.004	1
g28217.t1|PP1R8-MOUSE	0.058563	0.16	0.124	1
g28989.t1|SF3B1-HUMAN	0.04722	0.16	0.121	1
g8117.t1	0.0279882	0.029	0.013	1
g13188.t2	0.0746292	0.065	0.042	1
g4502.t1|CELF2-RAT	0.0775507	0.768	0.733	1
g12568.t1	-0.00983874	0.491	0.389	1
g2754.t1|NPHP3-DANRE	0.0144579	0.01	0.001	1
g24514.t1|DYDC1-HUMAN	-0.147921	0.114	0.143	1
g4397.t1|CADN-ACRMI	0.0157304	0.01	0.001	1
g13478.t1|MFSD6-MOUSE	0.0138439	0.01	0.001	1
g18841.t1|DMAP1-MOUSE	0.0317118	0.15	0.112	1
g16715.t1|UBQL1-RAT	0.0774994	0.489	0.433	1
g19210.t1|TAF7-CRIGR	0.0267259	0.235	0.188	1
g9280.t1	0.0972125	0.143	0.111	1
g17540.t1|AVR2A-CHICK	0.0267291	0.232	0.187	1
g13019.t1|PRPX-HORVU	-0.24173	0.17	0.196	1
g6139.t1|TSP2-MOUSE	0.0791824	0.033	0.016	1
g7730.t1|GCP6-MOUSE	0.0135954	0.098	0.067	1
g32887.t1	0.0627612	0.039	0.02	1
g30036.t1|LTV1-MOUSE	0.0675765	0.691	0.64	1
g3455.t1|TAF6-HUMAN	0.0425936	0.157	0.119	1
g17483.t1|INP5E-PANTR	0.0639739	0.337	0.283	1
g11725.t3|TRA2B-RAT	0.0642579	0.486	0.433	1
g12402.t1|TIPIN-DANRE	0.0623449	0.092	0.064	1
g3849.t1	0.0265567	0.042	0.023	1
g17485.t1|RUVB2-XENLA	-0.102712	0.218	0.26	1
g21046.t1|PSME3-CHICK	0.0407955	0.471	0.413	1
g20027.t1|KLC4-RAT	0.0152221	0.014	0.004	1
g16215.t1|PTPRF-MOUSE	0.0410046	0.048	0.027	1
g31801.t1|MYO6-CHICK	0.00705494	0.088	0.059	1
g24625.t1|STAR7-MOUSE	0.0397692	0.057	0.035	1
g23912.t1|STRAA-HUMAN	0.0581136	0.109	0.078	1
g17177.t1|TM175-MOUSE	-0.0214081	0.009	0.02	1
g33642.t1|HYPK-MACFA	0.0638562	0.634	0.581	1
g7205.t1|CLA1B-XENLA	0.00471272	0.102	0.072	1
g21787.t1	0.0771813	0.668	0.632	1
g6220.t1|SPAN-STRPU	0.0453571	0.016	0.004	1
g14904.t1|SYT11-HUMAN	-0.0632717	0.07	0.097	1
g12890.t1|HGNAT-HUMAN	0.0190345	0.1	0.07	1
g16437.t1|CHM4B-XENTR	0.0600489	0.574	0.521	1
g1560.t1|THEGL-MOUSE	-0.117205	0.05	0.073	1
g17935.t1|NDUS1-BOVIN	0.0487172	0.223	0.181	1
g19325.t1|BMS1-SCHPO	-0.0724816	0.161	0.197	1
g28263.t1|RECQ5-HUMAN	-0.0673941	0.094	0.124	1
g16901.t1|GDIA-BOVIN	0.0541086	0.196	0.155	1
g19577.t1|CATZ-RAT	0.173359	0.333	0.3	1
g2010.t1|PKHG5-HUMAN	0.0544533	0.085	0.058	1
g33001.t1|PFKAL-BOVIN	-0.0772594	0.124	0.155	1
g8659.t1|MARF1-MOUSE	0.00798977	0.104	0.074	1
g27389.t1|THAP9-HUMAN	0.0443028	0.045	0.026	1
g15469.t1|PTRD1-BOVIN	0.0445342	0.044	0.025	1
g29182.t1|DEAF1-MOUSE	0.0242826	0.03	0.014	1
g12788.t1|ANX12-HYDVU	0.0251955	0.251	0.205	1
g10305.t1|ARMC1-MOUSE	0.0324985	0.153	0.116	1
g236.t1|LIP1-PSYIM	-0.0647773	0.145	0.182	1
g28991.t1|SF3B1-XENLA	0.0315682	0.289	0.238	1
g12603.t1|TSN5-BOVIN	0.00468857	0.179	0.137	1
g11924.t1|WAP53-MESAU	0.0411134	0.107	0.077	1
g10840.t1	0.0278676	0.035	0.018	1
g28717.t1	0.020104	0.038	0.02	1
g19208.t1|SE1BA-DANRE	0.031926	0.218	0.174	1
g28463.t1|CA2D3-RAT	0.00818497	0.007	0	1
g29570.t1|TPPC2-XENTR	0.0579532	0.132	0.099	1
g7872.t1|OIT3-MOUSE	-0.0221337	0.008	0.019	1
g2774.t1|PSA7L-MOUSE	0.0752312	0.594	0.545	1
g15120.t1|DDAH1-MOUSE	-0.108429	0.175	0.21	1
g15244.t1|RIBC2-HUMAN	-0.00561392	0.119	0.155	1
g9107.t1|KIF28-MOUSE	0.0385644	0.136	0.102	1
g14731.t1|VATB-MANSE	0.0814168	0.647	0.616	1
g3780.t1	-0.109039	0.121	0.152	1
g4435.t1|NECB-HYDVU	-0.15815	0.771	0.788	1
g185.t1|M2OM-BOVIN	-0.093745	0.164	0.198	1
g8582.t1|TMM19-XENTR	0.0724155	0.099	0.071	1
g23713.t1|PH4H-RAT	0.0759403	0.135	0.101	1
g7521.t1|SMC6-XENLA	0.0195202	0.063	0.04	1
g18380.t1|SURF1-HUMAN	0.0444983	0.073	0.048	1
g7394.t1|SPTB2-MOUSE	0.0168199	0.024	0.01	1
g7500.t1|SAP18-DROME	0.0388213	0.174	0.136	1
g25278.t1|USH1C-MOUSE	0.0192397	0.024	0.01	1
g32982.t1|PDIA6-PONAB	-0.12488	0.717	0.736	1
g8941.t1|DHSO-BOVIN	-0.15394	0.335	0.367	1
g19742.t1|ALDH-CRAPL	0.0154557	0.012	0.003	1
g33503.t1|AK1A1-MOUSE	0.0365292	0.439	0.383	1
g31366.t1|S43A3-HUMAN	0.0158711	0.012	0.003	1
g7831.t1	0.0362973	0.109	0.079	1
g20081.t1|PDI21-ARATH	0.0596875	0.855	0.846	1
g8909.t1	-0.0319169	0.033	0.052	1
g30476.t1	0.0263101	0.098	0.068	1
g33794.t1|MYPH-ECHGR	-0.0555547	0.617	0.673	1
g29257.t1|SGCG-CANLF	0.0624024	0.214	0.173	1
g27920.t1|PRSS8-MOUSE	0.0306161	0.009	0.001	1
g4400.t1	0.0155674	0.009	0.001	1
g3383.t1|BACE2-MOUSE	0.0177634	0.009	0.001	1
g24253.t1|EF1D-MACFA	-0.0895987	0.744	0.741	1
g27435.t1|BAP31-HUMAN	0.0353123	0.39	0.34	1
g26973.t1	0.0348832	0.027	0.012	1
g5984.t1	0.0596426	0.096	0.068	1
g31022.t1|CCD43-MOUSE	0.0571972	0.117	0.087	1
g20655.t2|NEDD4-MOUSE	0.029921	0.197	0.156	1
g23117.t1|LYAG-RAT	0.11957	0.093	0.068	1
g12419.t1	0.017841	0.448	0.395	1
g17154.t1|DPP2-RAT	0.163566	0.176	0.145	1
g6000.t1|CAH2-TRIHK	0.0100224	0.007	0	1
g24406.t1|FGFR1-HUMAN	-0.113701	0.187	0.221	1
g21126.t1|VIP1-BOVIN	0.0228106	0.083	0.056	1
g13278.t1|CNIH1-PONAB	0.00767589	0.061	0.039	1
g30424.t1|ARFP2-BOVIN	0.0676111	0.471	0.412	1
g33392.t1|RAB5C-CHICK	0.0583865	0.447	0.387	1
g14551.t1|LIS1-NEMVE	0.0545391	0.573	0.519	1
g31460.t1|NPHP3-HUMAN	0.0223793	0.027	0.012	1
g22557.t1|ZN235-MOUSE	0.0421316	0.381	0.324	1
g3244.t1|NPHP3-XENTR	0.0488181	0.093	0.066	1
g7718.t1	0.0643352	0.308	0.259	1
g27421.t1|SPF45-HUMAN	0.0550909	0.383	0.335	1
g30304.t1|MCPI-MELCP	0.330735	0.421	0.523	1
g26621.t1|RS26-ANOGA	-0.0377739	0.963	0.975	1
g22678.t1|EEA1-MOUSE	0.023465	0.225	0.183	1
g26530.t1|AIM2-YEAST	0.0355011	0.188	0.149	1
g4975.t1|CUBN-RAT	0.0362691	0.018	0.006	1
g25706.t1|2ABA-RAT	0.0465714	0.321	0.272	1
g23437.t1|YS51-CAEEL	-0.26925	0.702	0.594	1
g15808.t1|TRF6A-XENLA	-0.0157125	0.018	0.032	1
g26033.t1|DGC14-HUMAN	0.0473906	0.104	0.075	1
g32227.t1	0.0184886	0.167	0.13	1
g19183.t1|PRAX-HUMAN	0.0402008	0.03	0.015	1
g9538.t1|SF3B5-HUMAN	0.0718113	0.374	0.325	1
g28187.t1|DIDO1-MOUSE	0.0392138	0.106	0.076	1
g29021.t1|CC067-MOUSE	0.0434632	0.077	0.052	1
g14071.t1|LTBP1-MOUSE	0.0118145	0.012	0.003	1
g5614.t1|TADBP-XENTR	0.0690922	0.355	0.305	1
g10362.t1	0.0761264	0.343	0.295	1
g1406.t1|TT39B-XENTR	0.109581	0.179	0.145	1
g6397.t1|CA043-MOUSE	0.0419578	0.229	0.186	1
g31324.t1|TPC2-DANRE	-0.0774252	0.139	0.171	1
g18524.t1	0.0423136	0.074	0.05	1
g9544.t1|ZNFX1-MOUSE	0.0828209	0.088	0.063	1
g8307.t1|NH2L1-XENTR	-0.0457783	0.47	0.521	1
g33197.t1|NBR1-HUMAN	0.0976459	0.61	0.573	1
g15015.t1|HE-PARLI	0.178461	0.224	0.188	1
g16073.t1	0.0507458	0.098	0.071	1
g2499.t1|RSRC2-XENLA	0.0481409	0.391	0.337	1
g21432.t1|RS24-TAKRU	-0.0842488	0.518	0.545	1
g1919.t1|P5CR-METAC	0.0458011	0.383	0.324	1
g4563.t1|R113A-HUMAN	0.0269465	0.1	0.072	1
g7099.t2|CLUA1-DANRE	0.0148699	0.25	0.205	1
g7649.t1|MLP-ACRMI	0.0511813	0.013	0.004	1
g14696.t1|TBD2B-MOUSE	0.0390785	0.051	0.031	1
g11789.t1|ADPRH-HUMAN	0.0712949	0.225	0.186	1
g11008.t1|MCCB-MOUSE	0.0297404	0.232	0.189	1
g25176.t1|SQSTM-PONAB	0.167207	0.697	0.672	1
g17846.t1|VPS51-XENTR	0.0487544	0.488	0.444	1
g33246.t1|DOT1L-HUMAN	0.0100183	0.082	0.057	1
g23914.t1	0.0288358	0.067	0.044	1
g8936.t1|EXC6B-MOUSE	0.0181474	0.024	0.011	1
g15124.t1|PP1B-XENTR	0.054178	0.434	0.38	1
g20641.t1|KC1G3-RAT	0.0560784	0.299	0.252	1
g8335.t1|WIPI3-CHICK	0.034462	0.12	0.089	1
g22990.t1|GULP1-DANRE	0.0948492	0.307	0.261	1
g30759.t1|CEL3B-MOUSE	-0.0214885	0.022	0.037	1
g1645.t2|KTNB1-STRPU	0.0272362	0.121	0.09	1
g29646.t1	0.0325564	0.077	0.052	1
g7009.t1|SASH1-MOUSE	0.0410764	0.476	0.422	1
g4411.t1|SSPA-DICDI	0.0295241	0.203	0.166	1
g6305.t1|FAHD1-DICDI	0.0283358	0.211	0.17	1
g26105.t1	0.0132207	0.006	0	1
g7666.t1|PKHL1-MOUSE	0.00904381	0.006	0	1
[truncated: 3,596 more rows]

## Sheet: F12vF0
ID	log2FC	log2CPM	SwissProt Hit ID	SwissProt Hit Description	False Discovery Rate
g1000	0.638856	0.782966	sp|P21329|RTJK_DROFU		0.0786361
g10002	-0.349369	2.86682	sp|Q9H611|PIF1_HUMAN	DNA-dependent ATPase and 5'-3' DNA helicase required for the maintenance of both mitochondrial and nuclear genome stability. Efficiently unwinds G-quadruplex (G4) DNA structures and forked RNA-DNA hybrids. Resolves G4 structures, preventing replication pausing and double-strand breaks (DSBs) at G4 motifs. Involved in the maintenance of telomeric DNA. Inhibits telomere elongation, de novo telomere…	0.178763
g10003	0.0922626	1.14819	sp|A5WFR0|PIF1_PSYWF	DNA-dependent ATPase and 5'-3' DNA helicase that efficiently unwinds G-quadruplex (G4) DNA structures. May be involved in resolving commom issues that arise during DNA replication, recombination, and repair.	0.853921
g10005	0.054443	2.32636			0.860052
g10014	0.108998	8.66037	sp|P55199|ELL_HUMAN	Elongation factor component of the super elongation complex (SEC), a complex required to increase the catalytic rate of RNA polymerase II transcription by suppressing transient pausing by the polymerase at multiple sites along the DNA. Elongation factor component of the little elongation complex (LEC), a complex required to regulate small nuclear RNA (snRNA) gene transcription by RNA polymerase I…	0.242494
g10016	0.0192713	1.72964			0.960902
g10017	0.24562	4.47718	sp|Q2KIA2|TR112_BOVIN	Acts as an activator of both rRNA/tRNA and protein methyltransferases. Together with methyltransferase BUD23, methylates the N(7) position of a guanine in 18S rRNA. The heterodimer with HEMK2/N6AMT1 catalyzes N5-methylation of ETF1 on 'Gln-185', using S-adenosyl L-methionine as methyl donor. The heterodimer with ALKBH8 catalyzes the methylation of 5-carboxymethyl uridine to 5-methylcarboxymethyl …	0.0484416
g10018	0.101291	10.4273	sp|Q4I963|COFI_GIBZE	Controls reversibly actin polymerization and depolymerization in a pH-sensitive manner. It has the ability to bind G- and F-actin in a 1:1 ratio of cofilin to actin. Binding to F-actin is regulated by tropomyosin. It is the major component of intranuclear and cytoplasmic actin rods. Required for accumulation of actin at the cell division site via depolymerizing actin at the cell ends. In associat…	0.535721
g1002	0.608609	1.99143	sp|Q9D3W5|LRC71_MOUSE		0.00711228
g10020	-0.0227981	1.58413	sp|P70057|KCNQ1_XENLA	Potassium channel that plays an important role in a number of tissues, including heart, inner ear, stomach and colon (By similarity). Associates with KCNE beta subunits that modulates current kinetics (By similarity). Induces a voltage-dependent by rapidly activating and slowly deactivating potassium-selective outward current (By similarity). Promotes also a delayed voltage activated potassium cu…	0.934972
g10022	0.355405	5.65126	sp|Q91W67|UBL7_MOUSE		0.000716514
g10027	-0.247094	3.31393	sp|P0C6Y7|PRDM9_RAT	Histone methyltransferase that specifically trimethylates 'Lys-4' of histone H3 during meiotic prophase and is essential for proper meiotic progression. Does not have the ability to mono- and dimethylate 'Lys-4' of histone H3. H3 'Lys-4' methylation represents a specific tag for epigenetic transcriptional activation. Plays a central role in the transcriptional activation of genes during early mei…	0.139044
g10028	-1.399	1.4904			0.000898306
g10029	0.0236317	3.95422	sp|Q6ZMW2|ZN782_HUMAN	May be involved in transcriptional regulation.	0.866199
g1003	0.130901	2.54042			0.557212
g10030	-0.159259	3.90039	sp|Q8JI28|TLL1_XENLA	Protease which processes procollagen C-propeptides, such as chordin. Required for the embryonic development. Predominant protease, which in the development, influences dorsal-ventral patterning and skeletogenesis.	0.248331
g10031	-1.67218	1.68189			7.17889e-06
g10032	0.104184	3.94248	sp|Q05B58|CCD53_BOVIN	Acts at least in part as component of the WASH core complex whose assembly at the surface of endosomes seems to inhibit WASH nucleation-promoting factor (NPF) activity in recruiting and activating the Arp2/3 complex to induce actin polymerization, and which is involved in regulation of the fission of tubules that serve as transport intermediates during endosome sorting.	0.52184
g10033	-0.403272	4.86461			0.00409567
g10034	0.62701	6.23307	sp|P08419|CEL2A_PIG	Acts upon elastin.	3.65721e-07
g10035	0.386941	3.44312	sp|Q7M3E1|CTRC_BOVIN	Has chymotrypsin-type protease activity and hypocalcemic activity.	0.0124007
g10037	-0.0237899	4.89629	sp|Q90YM8|CYFP1_DANRE	Involved in formation of membrane ruffles and lamellipodia protrusions and in axon outgrowth. Binds to F-actin but not to RNA (By similarity).	0.860077
g10038	0.0745165	2.25368	sp|Q299G2|CYFIP_DROPS	Plays a role in guidance and morphology of central and peripheral axons and in synaptic morphology. Also required for formation of cell membrane protrusions and for bristle development (By similarity).	0.756541
g10039	-0.114471	4.8061	sp|Q5SQX6|CYFP2_MOUSE	Part of the WAVE1 complex that regulates actin filament reorganization via its interaction with the Arp2/3 complex (By similarity). Involved in T-cell adhesion and p53-dependent induction of apoptosis (By similarity). Does not bind RNA. As component of the WAVE1 complex, required for BDNF-NTRK2 endocytic trafficking and signaling from early endosomes (PubMed:27605705).	0.365805
g1004	-0.294639	5.70142	sp|Q0II91|DJC21_BOVIN	May act as a co-chaperone for HSP70. May play a role in ribosomal RNA (rRNA) biogenesis, possibly in the maturation of the 60S subunit. Binds the precursor 45S rRNA.	0.0266081
g10040	-0.803336	2.63573	sp|Q9NYQ6|CELR1_HUMAN	Receptor that may have an important role in cell/cell signaling during nervous system formation.	0.000273614
g10041	0.0906245	4.50287	sp|Q90YM8|CYFP1_DANRE	Involved in formation of membrane ruffles and lamellipodia protrusions and in axon outgrowth. Binds to F-actin but not to RNA (By similarity).	0.462757
g10042	-0.282931	4.89764	sp|Q8K2L8|TPC12_MOUSE	Component of the TRAPP complex, which is involved in endoplasmic reticulum to Golgi apparatus trafficking at a very early stage. Also plays a role in chromosome congression, kinetochore assembly and stability and controls the recruitment of CENPE to the kinetochores.	0.00670744
g10044	0.23149	8.68803			0.0820102
g10045	0.580472	3.8432	sp|P61765|STXB1_RAT	Participates in the regulation of synaptic vesicle docking and fusion through interaction with GTP-binding proteins (PubMed:21689256). Essential for neurotransmission and binds syntaxin, a component of the synaptic vesicle fusion machinery probably in a 1:1 ratio. Can interact with syntaxins 1, 2, and 3 but not syntaxin 4. May play a role in determining the specificity of intracellular fusion rea…	0.000452777
g10047	0.747616	10.3835	sp|Q9UUC1|RL21A_SCHPO		7.17365e-08
g10048	-0.355685	2.75012	sp|Q4R5Z4|INT9_MACFA	Component of the Integrator (INT) complex, a complex involved in the small nuclear RNAs (snRNA) U1 and U2 transcription and in their 3'-box-dependent processing. The Integrator complex is associated with the C-terminal domain (CTD) of RNA polymerase II largest subunit (POLR2A) and is recruited to the U1 and U2 snRNAs genes. Mediates recruitment of cytoplasmic dynein to the nuclear envelope, proba…	0.0519099
g10049	-0.630269	3.02446			0.00223433
g10050	-0.13497	3.82442	sp|A7SBF0|INT9_NEMVE	Component of the Integrator complex, a complex involved in the small nuclear RNAs (snRNA) U1 and U2 transcription and in their 3'-box-dependent processing.	0.329606
g10051	-0.0640051	3.02535	sp|A1L2P5|HXD3_XENLA	Sequence-specific transcription factor which is part of a developmental regulatory system that provides cells with specific positional identities on the anterior-posterior axis.	0.749412
g10056	6.96635	2.76414	sp|P0CJ14|VP302_LYCMC		4.52926e-14
g10057	-0.223516	2.55414	sp|P31596|EAA2_RAT	Sodium-dependent, high-affinity amino acid transporter that mediates the uptake of L-glutamate and also L-aspartate and D-aspartate (PubMed:1448170, PubMed:7913472). Functions as a symporter that transports one amino acid molecule together with two or three Na(+) ions and one proton, in parallel with the counter-transport of one K(+) ion (PubMed:1448170). Mediates Cl(-) flux that is not coupled t…	0.293328
g1006	0.188921	0.5255			0.782528
g10061	1.2474	0.571005	sp|P21328|RTJK_DROME		0.245363
g10065	-0.00704761	2.55236	sp|O57321|EAA1_AMBTI	Sodium-dependent, high-affinity amino acid transporter that mediates the uptake of L-glutamate and also L-aspartate and D-aspartate (PubMed:9425012, PubMed:17008380). Functions as a symporter that transports one amino acid molecule together with two or three Na(+) ions and one proton, in parallel with the counter-transport of one K(+) ion (PubMed:17008380). Plays a redundant role in the rapid rem…	0.976703
g10066	0.998277	1.37768	sp|Q95135|EAA3_BOVIN	Sodium-dependent, high-affinity amino acid transporter that mediates the uptake of L-glutamate and also L-aspartate and D-aspartate. Can also transport L-cysteine (By similarity). Functions as a symporter that transports one amino acid molecule together with two or three Na(+) ions and one proton, in parallel with the counter-transport of one K(+) ion. Mediates Cl(-) flux that is not coupled to a…	0.000240666
g10068	0.847188	2.88689	sp|Q8LGG8|USPAL_ARATH		1.13766e-06
g10069	0.179859	0.81996			0.70025
g1007	0.350465	6.74547	sp|Q09328|MGT5A_HUMAN	Catalyzes the addition of N-acetylglucosamine (GlcNAc) in beta 1-6 linkage to the alpha-linked mannose of biantennary N-linked oligosaccharides (PubMed:10395745, PubMed:30140003). Catalyzes an important step in the biosynthesis of branched, complex-type N-glycans, such as those found on EGFR, TGFR (TGF-beta receptor) and CDH2 (PubMed:10395745, PubMed:22614033, PubMed:30140003). Via its role in th…	0.00087179
g10070	0.283934	5.60797	sp|Q6XUX0|DUSTY_CHICK	May act as a positive regulator of ERK phosphorylation downstream of fibroblast growth factor-receptor activation. May induce both caspase-dependent apoptosis and caspase-independent cell death.	0.00470609
g10074	0.749861	0.910019			0.0370743
g10076	0.0262899	3.00048	sp|Q6XUX2|DUSTY_RAT	Acts as a positive regulator of ERK phosphorylation downstream of fibroblast growth factor-receptor activation. Involved in the regulation of both caspase-dependent apoptosis and caspase-independent cell death. In the skin, it plays a predominant role in suppressing caspase-dependent apoptosis in response to UV stress in a range of dermal cell types.	0.915956
g10077	-0.445915	5.00871	sp|Q96MF2|STAC3_HUMAN	Required for normal excitation-contraction coupling in skeletal muscle and for normal muscle contraction in response to membrane depolarization. Required for normal Ca(2+) release from the sarcplasmic reticulum, which ultimately leads to muscle contraction. Probably functions via its effects on muscle calcium channels (PubMed:23736855, PubMed:29078335). Increases CACNA1S channel activity, in addi…	0.00220877
g10078	0.292767	3.80538	sp|Q9H1Y0|ATG5_HUMAN	Involved in autophagic vesicle formation. Conjugation with ATG12, through a ubiquitin-like conjugating system involving ATG7 as an E1-like activating enzyme and ATG10 as an E2-like conjugating enzyme, is essential for its function. The ATG12-ATG5 conjugate acts as an E3-like enzyme which is required for lipidation of ATG8 family proteins and their association to the vesicle membranes. Involved in…	0.0467846
g10081	0.453019	3.77086	sp|Q4R6U7|RM30_MACFA		0.0110757
g10082	-0.0219077	3.63848	sp|Q9GZQ3|COMD5_HUMAN	May modulate activity of cullin-RING E3 ubiquitin ligase (CRL) complexes (PubMed:21778237). Negatively regulates cell proliferation. Negatively regulates cell cycle G2/M phase transition probably by transactivating p21/CDKN1A through the p53/TP53-independent signaling pathway. Involved in kidney proximal tubule morphogenesis (By similarity). Down-regulates activation of NF-kappa-B (PubMed:1579996…	0.916602
g10083	0.0551439	3.99914	sp|Q9BSV6|SEN34_HUMAN	Constitutes one of the two catalytic subunit of the tRNA-splicing endonuclease complex, a complex responsible for identification and cleavage of the splice sites in pre-tRNA. It cleaves pre-tRNA at the 5'- and 3'-splice sites to release the intron. The products are an intron and two tRNA half-molecules bearing 2',3'-cyclic phosphate and 5'-OH termini. There are no conserved sequences at the splic…	0.755933
g10084	0.142797	7.44622	sp|P27448|MARK3_HUMAN	Serine/threonine-protein kinase (PubMed:23666762). Involved in the specific phosphorylation of microtubule-associated proteins for MAP2 and MAP4. Phosphorylates the microtubule-associated protein MAPT/TAU (PubMed:23666762). Phosphorylates CDC25C on 'Ser-216'. Regulates localization and activity of some histone deacetylases by mediating phosphorylation of HDAC7, promoting subsequent interaction be…	0.123513
g10086	1.03765	4.70452			4.86256e-11
g10088	-0.811646	4.73396	sp|Q9HAV4|XPO5_HUMAN	Mediates the nuclear export of proteins bearing a double-stranded RNA binding domain (dsRBD) and double-stranded RNAs (cargos). XPO5 in the nucleus binds cooperatively to the RNA and to the GTPase Ran in its active GTP-bound form. Proteins containing dsRBDs can associate with this trimeric complex through the RNA. Docking of this complex to the nuclear pore complex (NPC) is mediated through bindi…	0.000108238
g10089	-0.831027	3.31997	sp|Q924C1|XPO5_MOUSE	Mediates the nuclear export of proteins bearing a double-stranded RNA binding domain (dsRBD) and double-stranded RNAs (cargos). XPO5 in the nucleus binds cooperatively to the RNA and to the GTPase Ran in its active GTP-bound form. Proteins containing dsRBDs can associate with this trimeric complex through the RNA. Docking of this complex to the nuclear pore complex (NPC) is mediated through bindi…	0.000146685
g10091	-0.255481	3.96244	sp|Q8VIB2|DAXX_RAT	Transcription corepressor known to repress transcriptional potential of several sumoylated transcription factors. Down-regulates basal and activated transcription. Its transcription repressor activity is modulated by recruiting it to subnuclear compartments like the nucleolus or PML/POD/ND10 nuclear bodies through interactions with MCSR1 and PML, respectively. Seems to regulate transcription in P…	0.109002
g10093	0.199565	4.20229	sp|Q8WZA0|LZIC_HUMAN		0.112272
g10095	-0.21518	3.97849	sp|Q8BGQ1|SPE39_MOUSE	Proposed to be involved in endosomal maturation implicating in part VPS33B. In epithelial cells, the VPS33B:VIPAS39 complex may play a role in the apical RAB11A-dependent recycling pathway and in the maintenance of the apical-basolateral polarity (PubMed:20190753). May play a role in lysosomal trafficking, probably via association with the core HOPS complex in a discrete population of endosomes; …	0.141721
g10096	-0.372458	2.93354	sp|F6RIX4|MCM9_XENTR	Component of the MCM8-MCM9 complex, a complex involved in homologous recombination repair following DNA interstrand cross-links and plays a key role during gametogenesis. The MCM8-MCM9 complex probably acts as a hexameric helicase required to process aberrant forks into homologous recombination substrates and to orchestrate homologous recombination with resection, fork stabilization and fork rest…	0.0184643
g10100	0.647384	1.63844	sp|Q6DJF8|MET23_XENLA	Probable methyltransferase.	0.0440831
g10102	0.00460256	4.60448	sp|Q6P7K5|EMC10_XENTR		0.982089
g10106	0.126698	4.29866	sp|Q96PZ7|CSMD1_HUMAN	Potential suppressor of squamous cell carcinomas.	0.301335
g10107	0.0192254	3.31958	sp|O60232|SSA27_HUMAN	Might play a role in mitosis. Antigenic molecule. Could be a centromere-associated protein. May induce anti-centromere antibodies.	0.910823
g1011	0.614917	3.65218	sp|Q8IYS1|P20D2_HUMAN		0.000682186
g10114	-0.188517	1.98246			0.445375
g10117	0.360998	6.48739			9.00755e-05
g10118	-0.394223	3.06588	sp|Q9NW15|ANO10_HUMAN	Does not exhibit calcium-activated chloride channel (CaCC) activity. Can inhibit the activity of ANO1.	0.0229886
g10119	0.0245009	3.737	sp|Q6AZT2|SPAST_XENLA	ATP-dependent microtubule severing protein that specifically recognizes and cuts microtubules that are polyglutamylated. Preferentially recognizes and acts on microtubules decorated with short polyglutamate tails: severing activity increases as the number of glutamates per tubulin rises from one to eight, but decreases beyond this glutamylation threshold. Microtubule severing promotes reorganizat…	0.882769
g1012	0.453969	5.83906	sp|A3KG59|P20D2_MOUSE		8.1138e-05
g10121	-0.678442	3.89643	sp|Q8IS44|DRD2L_DROME	Receptor for dopamine. The activity of this receptor is mediated by G proteins which inhibit adenylyl cyclase.	0.000311693
g10122	-0.820757	1.26247			0.00724661
g10123	-0.00487852	4.19465	sp|Q5BLE8|RETST_DANRE	Catalyzes the saturation of all-trans-retinol to all-trans-13,14-dihydroretinol. In addition, saturates the 7-8 double bond of all-trans-retinol to produce all-trans-7,8-dihydroretinol. Can also use vitamin A2 (all-trans-3,4-didehydroretinol) as a substrate, to produce all-trans-13,14-dihydro-3,4-didehydroretinol or all-trans-7,8-dihydro-3,4-didehydroretinol. May play a role in vitamin A metaboli…	0.976703
g10124	0.744899	4.51352	sp|P29540|T2EB_XENLA	Recruits TFIIH to the initiation complex and stimulates the RNA polymerase II C-terminal domain kinase and DNA-dependent ATPase activities of TFIIH. Both TFIIH and TFIIE are required for promoter clearance by RNA polymerase.	1.39403e-06
g10126	0.288984	2.6948			0.148603
g10127	-0.260472	5.46588	sp|Q91287|FGFR3_PLEWA	Tyrosine-protein kinase that acts as cell-surface receptor for fibroblast growth factors and plays an essential role in the regulation of cell proliferation, differentiation and apoptosis. Plays an essential role in the regulation of chondrocyte differentiation, proliferation and apoptosis, and is required for normal skeleton development. Regulates both osteogenesis and postnatal bone mineralizat…	0.00790535
g1013	0.514695	4.3928	sp|Q501L1|P20D2_XENTR		4.25074e-05
g10131	0.751787	5.6651	sp|Q9CY57|CHTOP_MOUSE	Plays an important role in the ligand-dependent activation of estrogen receptor target genes (By similarity). May play a role in the silencing of fetal globin genes (PubMed:20688955). Recruits the 5FMC complex to ZNF148, leading to desumoylation of ZNF148 and subsequent transactivation of ZNF148 target genes (PubMed:22872859). Required for the tumorigenicity of glioblastoma cells. Binds to 5-hydr…	1.7836e-06
g10133	-0.31602	3.5382	sp|Q9VB25|KL98A_DROME	Plus end-directed motor protein involved in asymmetric cell division of sensory organ precursor (SOP) cells by playing a role in the asymmetric localization of Sara-expressing endosomes to the pIIa daughter cell but not to the pIIb cell. Targets Sara-expressing endosomes to the central spindle which is symmetrically arranged in early cell division. During late cytokinesis, central spindle asymmet…	0.0919767
g10134	-0.722194	5.17937			0.00034127
g10136	0.116343	3.00324	sp|Q91287|FGFR3_PLEWA	Tyrosine-protein kinase that acts as cell-surface receptor for fibroblast growth factors and plays an essential role in the regulation of cell proliferation, differentiation and apoptosis. Plays an essential role in the regulation of chondrocyte differentiation, proliferation and apoptosis, and is required for normal skeleton development. Regulates both osteogenesis and postnatal bone mineralizat…	0.5425
g10139	0.171951	3.32194			0.467344
g1014	0.833894	2.90722	sp|P85107|TGS1_RAT	Catalyzes the 2 serial methylation steps for the conversion of the 7-monomethylguanosine (m(7)G) caps of snRNAs and snoRNAs to a 2,2,7-trimethylguanosine (m(2,2,7)G) cap structure. The enzyme is specific for guanine, and N7 methylation must precede N2 methylation. Hypermethylation of the m7G cap of U snRNAs leads to their concentration in nuclear foci, their colocalization with coilin and the for…	0.000972455
g10140	-0.807736	3.96644	sp|Q6TCH4|PAQR6_HUMAN	Plasma membrane progesterone (P4) receptor coupled to G proteins (PubMed:23763432, PubMed:23161870). Seems to act through a G(s) mediated pathway (PubMed:23161870). Involved in neurosteroid inhibition of apoptosis (PubMed:23161870). May be involved in regulating rapid P4 signaling in the nervous system (PubMed:23763432). Also binds dehydroepiandrosterone (DHEA), pregnanolone, pregnenolone and all…	2.95198e-06
g10141	-0.0215548	3.60161	sp|Q9BXW6|OSBL1_HUMAN	Binds phospholipids; exhibits strong binding to phosphatidic acid and weak binding to phosphatidylinositol 3-phosphate (By similarity). Stabilizes GTP-bound RAB7A on late endosomes/lysosomes and alters functional properties of late endocytic compartments via its interaction with RAB7A (PubMed:16176980). Binds 25-hydroxycholesterol and cholesterol (PubMed:17428193).	0.923131
g10142	-0.0129769	3.31764	sp|Q9H0R3|TM222_HUMAN		0.957705
g10144	-0.124789	5.0441	sp|Q9H0R3|TM222_HUMAN		0.265103
g10145	0.898195	4.57722	sp|Q96CM3|RUSD4_HUMAN	Catalyzes uridine to pseudouridine isomerization (pseudouridylation) of different mitochondrial RNA substrates. Acts on position 1397 in 16S mitochondrial ribosomal RNA (16S mt-rRNA). This modification is required for the assembly of 16S mt-rRNA into a functional mitochondrial ribosome (PubMed:27974379). Acts on position 39 in mitochondrial tRNA(Phe) (PubMed:28082677). As a component of a functio…	3.57339e-08
g10146	-0.414275	3.04304	sp|Q3U0J8|TBD2B_MOUSE	May act as a GTPase-activating protein.	0.0311429
g10147	-0.612674	2.41632			0.00724661
g10148	-0.264169	4.33428	sp|Q9BYX2|TBD2A_HUMAN	Acts as GTPase-activating protein for RAB7A. Signal effector acting as a linker between RAC1 and RAB7A, leading to RAB7A inactivation and subsequent inhibition of cadherin degradation and reduced cell-cell adhesion.	0.0255834
g1015	1.06095	3.05821	sp|A3KG59|P20D2_MOUSE		3.65176e-05
g10150	0.124981	3.93641	sp|Q9R0M5|TPK1_MOUSE	Catalyzes the phosphorylation of thiamine to thiamine pyrophosphate. Can also catalyze the phosphorylation of pyrithiamine to pyrithiamine pyrophosphate.	0.460916
g10157	-0.949335	1.63756	sp|Q9JLI7|SPAG6_MOUSE	Important for structural integrity of the central apparatus in the sperm tail and for flagellar motility.	0.0479337
g10161	0.426249	1.02619			0.238671
g10162	0.315374	4.54122	sp|Q9JLI7|SPAG6_MOUSE	Important for structural integrity of the central apparatus in the sperm tail and for flagellar motility.	0.0516825
g10164	-0.0518459	1.96974			0.852156
g10165	1.32165	8.75369	sp|P30754|CAFF_RIFPA	Fibril-forming collagen.	2.00646e-10
g10166	1.08392	9.45319	sp|B8V7R6|COA_ACRMI		3.1858e-10
g10167	-0.423506	4.93453			0.050226
g10168	-0.330261	3.57343	sp|Q66GT5|PTPM1_MOUSE	Lipid phosphatase which dephosphorylates phosphatidylglycerophosphate (PGP) to phosphatidylglycerol (PG) (PubMed:21641550, PubMed:21730175). PGP is an essential intermediate in the biosynthetic pathway of cardiolipin, a mitochondrial-specific phospholipid regulating the membrane integrity and activities of the organelle (PubMed:21641550). Has also been shown to display phosphatase activity toward…	0.057256
g1017	-0.044125	3.48339	sp|B8VIW9|FP_ACRMI		0.800027
g10170	0.932167	4.79185	sp|Q4V7W3|HEXIM_XENLA	Probable transcriptional regulator which functions as a general RNA polymerase II transcription inhibitor.	2.11797e-08
g10171	-0.0927941	3.52789	sp|Q6IQX7|CHSS2_MOUSE	Has both beta-1,3-glucuronic acid and beta-1,4-N-acetylgalactosamine transferase activity. Transfers glucuronic acid (GlcUA) from UDP-GlcUA and N-acetylgalactosamine (GalNAc) from UDP-GalNAc to the non-reducing end of the elongating chondroitin polymer (By similarity). Isoform 2 may facilitate PRKN transport into the mitochondria. In collaboration with PRKN, isoform 2 may enhance cell viability a…	0.660736
g10174	0.41943	3.88656	sp|Q8IZ52|CHSS2_HUMAN	Has both beta-1,3-glucuronic acid and beta-1,4-N-acetylgalactosamine transferase activity. Transfers glucuronic acid (GlcUA) from UDP-GlcUA and N-acetylgalactosamine (GalNAc) from UDP-GalNAc to the non-reducing end of the elongating chondroitin polymer. Isoform 2 may facilitate PRKN transport into the mitochondria. In collaboration with PRKN, isoform 2 may enhance cell viability and protect cells…	0.00330488
g10175	0.175015	3.71128	sp|Q5RDU7|YPEL5_PONAB	Component of the CTLH E3 ubiquitin-protein ligase complex that selectively accepts ubiquitin from UBE2H and mediates ubiquitination and subsequent proteasomal degradation of the transcription factor HBP1 (By similarity). Required for normal cell proliferation (By similarity).	0.314614
g10176	-0.13839	0.991916	sp|Q9Y6W3|CAN7_HUMAN	Calcium-regulated non-lysosomal thiol-protease.	0.76839
g10179	0.313844	4.00026	sp|Q9R1S8|CAN7_MOUSE	Calcium-regulated non-lysosomal thiol-protease.	0.0252061
g1018	-1.23769	1.07534	sp|Q9X5V3|ATCU_RHILV	Involved in copper efflux.	0.00572946
g10182	-0.240756	4.94728	sp|Q9R1S8|CAN7_MOUSE	Calcium-regulated non-lysosomal thiol-protease.	0.0253324
g10184	-0.907459	1.92484			0.00155719
g10186	0.191016	2.03881	sp|O14718|OPSX_HUMAN	May play a role in rpe physiology either by detecting light directly or by monitoring the concentration of retinoids or other photoreceptor-derived compounds.	0.413115
g10198	0.114306	5.76318			0.191474
g102	0.8299	5.26575	sp|P97765|WBP2_MOUSE	Acts as transcriptional coactivator of estrogen and progesterone receptors (ESR1 and PGR) upon hormone activation. In presence of estrogen, binds to ESR1-responsive promoters. Required for YAP1 coactivation function on PGR activity. Synergizes with WBP2 in enhancing PGR activity (By similarity). Modulates expression of post-synaptic scaffolding proteins via regulation of ESR1, ESR2 and PGR (PubMe…	5.81282e-06
g10205	-0.186413	4.04034	sp|Q9UBN7|HDAC6_HUMAN	Responsible for the deacetylation of lysine residues on the N-terminal part of the core histones (H2A, H2B, H3 and H4). Histone deacetylation gives a tag for epigenetic repression and plays an important role in transcriptional regulation, cell cycle progression and developmental events. Histone deacetylases act via the formation of large multiprotein complexes (By similarity). Plays a central rol…	0.208356
g10206	-0.212016	2.03352	sp|Q00808|HETE1_PODAS	Responsible for vegetative incompatibility through specific interactions with different alleles of the unlinked gene, het-c.	0.431758
g10207	1.78311	0.930106			1.6885e-05
g10208	0.166383	2.70269			0.643706
g10209	-0.106525	1.46903	sp|Q804X9|OPN4A_GADMO	Photoreceptor implicated in non-image-forming responses to light.	0.76432
g1021	-1.49562	8.00159	sp|Q9JJI8|RL38_MOUSE		0.0176793
g10210	-0.475477	3.75908	sp|Q2KJ97|NCDN_BOVIN	Probably involved in signal transduction, in the nervous system, via increasing cell surface localization of GRM5 and positively regulating its signaling. Required for the spatial learning process. Acts as a negative regulator of Ca(2+)-calmodulin-dependent protein kinase 2 (CaMK2) phosphorylation. May play a role in modulating melanin-concentrating hormone-mediated functions via its interaction …	0.0339595
g10211	-0.408634	3.33451			0.0162744
g10212	-0.289755	3.45514	sp|Q32NR9|FRITZ_XENLA	Probable effector of the planar cell polarity signaling pathway which regulates the septin cytoskeleton in both ciliogenesis and collective cell movements including covergent extension during gastrulation. Controls cell shape but not polarization during convergent extension (PubMed:20671153). Proposed to function as core component of the CPLANE (ciliogenesis and planar polarity effectors) complex…	0.071644
g10216	-3.62687	2.69548			7.80254e-12
g10217	-0.518487	3.48847	sp|Q9NBX4|RTXE_DROME		0.0030599
g10221	-0.919852	3.6536	sp|Q9H270|VPS11_HUMAN	Plays a role in vesicle-mediated protein trafficking to lysosomal compartments including the endocytic membrane transport and autophagic pathways. Believed to act as a core component of the putative HOPS and CORVET endosomal tethering complexes which are proposed to be involved in the Rab5-to-Rab7 endosome conversion probably implicating MON1A/B, and via binding SNAREs and SNARE complexes to medi…	5.55246e-07
g10222	-0.126185	3.1856	sp|Q91W86|VPS11_MOUSE	Plays a role in vesicle-mediated protein trafficking to lysosomal compartments including the endocytic membrane transport and autophagic pathways. Believed to act as a core component of the putative HOPS and CORVET endosomal tethering complexes which are proposed to be involved in the Rab5-to-Rab7 endosome conversion probably implicating MON1A/B, and via binding SNAREs and SNARE complexes to medi…	0.463448
g10223	-0.289621	0.820881			0.435089
g10224	-0.655089	2.39073	sp|Q91W86|VPS11_MOUSE	Plays a role in vesicle-mediated protein trafficking to lysosomal compartments including the endocytic membrane transport and autophagic pathways. Believed to act as a core component of the putative HOPS and CORVET endosomal tethering complexes which are proposed to be involved in the Rab5-to-Rab7 endosome conversion probably implicating MON1A/B, and via binding SNAREs and SNARE complexes to medi…	0.0052297
g10225	-0.242301	3.32279	sp|Q91W86|VPS11_MOUSE	Plays a role in vesicle-mediated protein trafficking to lysosomal compartments including the endocytic membrane transport and autophagic pathways. Believed to act as a core component of the putative HOPS and CORVET endosomal tethering complexes which are proposed to be involved in the Rab5-to-Rab7 endosome conversion probably implicating MON1A/B, and via binding SNAREs and SNARE complexes to medi…	0.153941
g10230	-1.75492	8.22165	sp|Q9Y493|ZAN_HUMAN	Binds in a species-specific manner to the zona pellucida of the egg. May be involved in gamete recognition and/or signaling.	9.52874e-08
g10231	-2.54039	5.99154			3.7726e-08
g10232	-3.07091	2.20053			1.73759e-11
g10234	-0.136373	0.809903			0.74151
g10235	0.192255	6.13509	sp|P23253|TCNA_TRYCR	Developmentally regulated neuraminidase implicated in parasite invasion of cells.	0.401088
g10236	0.426175	4.00964	sp|Q14246|AGRE1_HUMAN	Orphan receptor involved in cell adhesion and probably in cell-cell interactions specifically involving cells of the immune system. May play a role in regulatory T-cells (Treg) development.	0.0296963
g10239	0.104316	7.83571	sp|Q8CG19|LTBP1_MOUSE	Key regulator of transforming growth factor beta (TGFB1, TGFB2 and TGFB3) that controls TGF-beta activation by maintaining it in a latent state during storage in extracellular space. Associates specifically via disulfide bonds with the Latency-associated peptide (LAP), which is the regulatory chain of TGF-beta, and regulates integrin-dependent activation of TGF-beta. Outcompeted by LRRC32/GARP fo…	0.365407
g10240	0.151552	7.48695	sp|Q96WV6|YHU2_SCHPO		0.512829
g10244	-1.21003	3.02831	sp|Q14766|LTBP1_HUMAN	Key regulator of transforming growth factor beta (TGFB1, TGFB2 and TGFB3) that controls TGF-beta activation by maintaining it in a latent state during storage in extracellular space (PubMed:2022183, PubMed:8617200, PubMed:8939931). Associates specifically via disulfide bonds with the Latency-associated peptide (LAP), which is the regulatory chain of TGF-beta, and regulates integrin-dependent acti…	0.000109953
g10245	-1.50616	0.576646	sp|P0CT40|TF29_SCHPO		0.0440806
g10249	0.457545	7.41618	sp|Q96WV6|YHU2_SCHPO		0.0157279
g1025	-0.686698	4.38392			2.6773e-06
g10253	-0.720574	6.15373	sp|Q99MW1|STK31_MOUSE		2.09455e-06
g10255	-0.819352	1.89094	sp|Q80T41|GABR2_MOUSE	Component of a heterodimeric G-protein coupled receptor for GABA, formed by GABBR1 and GABBR2 (PubMed:10075644). Within the heterodimeric GABA receptor, only GABBR1 seems to bind agonists, while GABBR2 mediates coupling to G proteins (By similarity). Ligand binding causes a conformation change that triggers signaling via guanine nucleotide-binding proteins (G proteins) and modulates the activity …	0.00659785
g10256	-0.255991	3.14555	sp|Q9HCU4|CELR2_HUMAN	Receptor that may have an important role in cell/cell signaling during nervous system formation.	0.152953
g1026	-0.439402	3.96389	sp|Q9UHW5|GPN3_HUMAN	Small GTPase required for proper localization of RNA polymerase II (RNAPII). May act at an RNAP assembly step prior to nuclear import.	0.00699496
g10262	0.651904	7.30928	sp|P56101|DNJC5_TETCF	May have an important role in presynaptic function. May be involved in calcium-dependent neurotransmitter release at nerve endings.	3.17553e-08
g1027	-0.749124	1.84787	sp|Q9Y3C4|TPRKB_HUMAN	Component of the EKC/KEOPS complex that is required for the formation of a threonylcarbamoyl group on adenosine at position 37 (t(6)A37) in tRNAs that read codons beginning with adenine (PubMed:22912744, PubMed:28805828). The complex is probably involved in the transfer of the threonylcarbamoyl moiety of threonylcarbamoyl-AMP (TC-AMP) to the N6 group of A37 (PubMed:22912744, PubMed:28805828). TPR…	0.114158
g10270	0.364008	1.3368			0.172994
g10271	-0.403278	2.02467	sp|Q9S7T7|SCC11_ARATH	Involved in chromosome condensation, pairing and segregation during meiosis. Responsible for cohesion between replicated sister chromatids.	0.0954833
g10273	-0.125418	5.96445	sp|Q6AXJ7|F199X_DANRE		0.352626
g10276	0.283403	3.49513	sp|Q8BJL1|FBX30_MOUSE	Substrate-recognition component of the SCF (SKP1-CUL1-F-box protein)-type E3 ubiquitin ligase complex. Required for muscle atrophy following denervation.	0.121766
g1028	0.171482	2.88159	sp|Q28CA0|PITC1_XENTR	Phosphatidylinositol transfer proteins mediate the monomeric transport of lipids by shielding a lipid from the aqueous environment and binding the lipid in a hydrophobic cavity.	0.401497
g10288	-1.68698	1.83834	sp|Q5SVZ6|ZMYM1_HUMAN		3.67808e-06
g10289	0.623766	8.62951	sp|P42669|PURA_MOUSE	This is a probable transcription activator that specifically binds the purine-rich single strand of the PUR element located upstream of the c-Myc gene. May play a role in the initiation of DNA replication and in recombination.	1.19225e-07
g1029	0.327717	2.97844	sp|Q8BHA3|DTD2_MOUSE	Deacylates mischarged D-aminoacyl-tRNAs. Probably acts by rejecting L-amino acids from its binding site rather than specific recognition of D-amino acids. Catalyzes the hydrolysis of D-tyrosyl-tRNA(Tyr), has no activity on correctly charged L-tyrosyl-tRNA(Tyr). By recycling D-aminoacyl-tRNA to D-amino acids and free tRNA molecules, this enzyme counteracts the toxicity associated with the formatio…	0.0392538
g10292	-0.674918	3.2868	sp|Q64487|PTPRD_MOUSE	Can bidirectionally induce pre- and post-synaptic differentiation of neurons by mediating interaction with IL1RAP and IL1RAPL1 trans-synaptically (PubMed:25908590). Involved in pre-synaptic differentiation through interaction with SLITRK2 (PubMed:25989451).	0.00626587
g10293	0.593678	3.10381			0.00113153
g10295	0.548081	3.10033	sp|Q96HJ3|CCD34_HUMAN		0.00323074
g10296	-0.622848	2.43302	sp|Q9W6B4|TIMP3_SCYTO	Complexes with metalloproteinases (such as collagenases) and irreversibly inactivates them by binding to their catalytic zinc cofactor. May form part of a tissue-specific acute response to remodeling stimuli (By similarity).	0.00782602
g10298	0.379805	2.85737	sp|Q76KP1|B4GN4_HUMAN	Transfers N-acetylgalactosamine (GalNAc) from UDP-GalNAc to N-acetylglucosamine-beta-benzyl with a beta-1,4-linkage to form N,N'-diacetyllactosediamine, GalNAc-beta-1,4-GlcNAc structures in N-linked glycans and probably O-linked glycans.	0.0471297
g103	-0.671889	2.34379	sp|P29322|EPHA8_HUMAN	Receptor tyrosine kinase which binds promiscuously GPI-anchored ephrin-A family ligands residing on adjacent cells, leading to contact-dependent bidirectional signaling into neighboring cells. The signaling pathway downstream of the receptor is referred to as forward signaling while the signaling pathway downstream of the ephrin ligand is referred to as reverse signaling. The GPI-anchored ephrin-…	0.0253128
g10300	1.64727	0.647919	sp|Q76KP1|B4GN4_HUMAN	Transfers N-acetylgalactosamine (GalNAc) from UDP-GalNAc to N-acetylglucosamine-beta-benzyl with a beta-1,4-linkage to form N,N'-diacetyllactosediamine, GalNAc-beta-1,4-GlcNAc structures in N-linked glycans and probably O-linked glycans.	0.000118359
g10301	0.293229	7.12185	sp|Q8VHC8|MA2B1_CAVPO	Necessary for the catabolism of N-linked carbohydrates released during glycoprotein turnover.	0.000528168
g10303	-0.124551	4.11249	sp|P0C026|NUD24_ARATH	Probably mediates the hydrolysis of some nucleoside diphosphate derivatives.	0.331116
g10304	-1.08512	4.60865			2.97438e-07
g10305	0.469869	5.78791	sp|Q9D7A8|ARMC1_MOUSE		0.000106673
g10306	1.25556	0.529037			0.0170629
g10308	0.377995	0.576204			0.361041
g10309	-0.0776945	5.62616	sp|Q92968|PEX13_HUMAN	Component of the peroxisomal translocation machinery with PEX14 and PEX17. Functions as a docking factor for the predominantly cytoplasmic PTS1 receptor (PAS10/PEX5). Involved in the import of PTS1 and PTS2 proteins.	0.610796
g1031	0.440398	3.10961	sp|Q9D1C9|RRP7A_MOUSE		0.039327
g10310	0.241514	3.02112	sp|Q95SX7|RTBS_DROME		0.1416
g10312	-0.552448	4.81382			0.000126481
g10313	0.0857843	4.30166			0.558632
g10316	0.482998	9.22096	sp|P61222|ABCE1_MOUSE	Antagonizes the binding of 2-5A (5'-phosphorylated 2',5'-linked oligoadenylates) by RNase L through direct interaction with RNase L and therefore inhibits its endoribonuclease activity. May play a central role in the regulation of mRNA turnover. Antagonizes the anti-viral effect of the interferon-regulated 2-5A/RNase L pathway (By similarity).	1.70046e-05
g10317	-0.164806	5.52523	sp|Q8NI36|WDR36_HUMAN	Involved in the nucleolar processing of SSU 18S rRNA. Involved in T-cell activation and highly coregulated with IL2.	0.128459
g1032	-0.15189	1.55818			0.659128
g10320	-0.00157927	5.81201	sp|Q8NI36|WDR36_HUMAN	Involved in the nucleolar processing of SSU 18S rRNA. Involved in T-cell activation and highly coregulated with IL2.	0.988519
g10321	0.428411	2.12625	sp|Q8NA54|IQUB_HUMAN	May play roles in cilia formation and/or maintenance.	0.092243
g10322	0.097345	2.52112	sp|Q9NBX4|RTXE_DROME		0.700328
g10323	-0.11354	3.57189			0.576106
g10324	0.420889	8.27929	sp|Q8BG95|MYPT2_MOUSE	Regulates myosin phosphatase activity. Augments Ca(2+) sensitivity of the contractile apparatus (By similarity).	5.7261e-05
g10325	0.753015	7.54301			4.28537e-08
g10327	-0.37054	5.76294	sp|P21675|TAF1_HUMAN	Largest component and core scaffold of the TFIID basal transcription factor complex (PubMed:25412659, PubMed:27007846). Contains novel N- and C-terminal Ser/Thr kinase domains which can autophosphorylate or transphosphorylate other transcription factors. Phosphorylates TP53 on 'Thr-55' which leads to MDM2-mediated degradation of TP53. Phosphorylates GTF2A1 and GTF2F1 on Ser residues. Possesses DN…	0.027533
g10328	-0.295666	3.46947	sp|Q60544|TAF1_MESAU	Largest component and core scaffold of the TFIID basal transcription factor complex. Contains novel N- and C-terminal Ser/Thr kinase domains which can autophosphorylate or transphosphorylate other transcription factors. Phosphorylates TP53 on 'Thr-55' which leads to MDM2-mediated degradation of TP53. Phosphorylates GTF2A1 and GTF2F1 on Ser residues. Possesses DNA-binding activity (By similarity).…	0.075962
g10329	-0.279977	4.53176	sp|Q8IZX4|TAF1L_HUMAN	May act as a functional substitute for TAF1/TAFII250 during male meiosis, when sex chromosomes are transcriptionally silenced.	0.0580589
g1033	-0.402793	1.46683	sp|Q9ULU4|PKCB1_HUMAN	May act as a transcriptional corepressor for KDM5D. Required for KDM5D-mediated down-regulation of diverse metastasis-associated genes; the function seems to involve the recognition of the dual histone signature H3K4me1-H3K14ac. Suppresses prostate cancer cell invasion.	0.256727
g10330	0.305248	3.94707	sp|Q58DN4|PPME1_BOVIN	Demethylates proteins that have been reversibly carboxymethylated. Demethylates PPP2CB (in vitro) and PPP2CA. Binding to PPP2CA displaces the manganese ion and inactivates the enzyme (By similarity).	0.0197027
g10331	0.400307	4.69667	sp|Q6AYU1|MO4L1_RAT	Component of the NuA4 histone acetyltransferase complex which is involved in transcriptional activation of select genes principally by acetylation of nucleosomal histones H4 and H2A. This modification may both alter nucleosome - DNA interactions and promote interaction of the modified histones with other proteins which positively regulate transcription. This complex may be required for the activa…	0.00390226
g10332	-0.13509	6.44604	sp|J9VXM5|CHS3_CRYNH	Appears to be responsible for the synthesis of the majority of the chitin found in the cell wall periphery.	0.101243
g10336	0.645097	4.37584	sp|Q6DRF9|WDR55_DANRE	Nucleolar protein that acts as a modulator of rRNA synthesis. Plays a central role during organogenesis (By similarity).	2.69642e-06
g10337	0.583544	2.29998	sp|Q17QK8|SPRE_BOVIN	Catalyzes the final one or two reductions in tetra-hydrobiopterin biosynthesis to form 5,6,7,8-tetrahydrobiopterin.	0.0124618
g10338	0.566492	4.60673	sp|A2AVA0|SVEP1_MOUSE	May play a role in the cell attachment process.	0.000841519
g1034	-0.0359489	1.79232	sp|Q9ULU4|PKCB1_HUMAN	May act as a transcriptional corepressor for KDM5D. Required for KDM5D-mediated down-regulation of diverse metastasis-associated genes; the function seems to involve the recognition of the dual histone signature H3K4me1-H3K14ac. Suppresses prostate cancer cell invasion.	0.897135
g10340	0.618268	1.04226			0.056331
g10344	0.181617	7.76749	sp|Q4LDE5|SVEP1_HUMAN	May play a role in the cell attachment process.	0.133936
g10345	0.453697	3.56872	sp|Q6MG82|PRRT1_RAT		0.0036067
g10348	-2.56582	3.27273			2.83673e-07
g10349	-3.86083	4.63383			3.8443e-11
g10351	-0.0299715	5.36162	sp|Q9QUN9|DKK3_MOUSE	Antagonizes canonical Wnt signaling by inhibiting LRP5/6 interaction with Wnt and by forming a ternary complex with the transmembrane protein KREMEN that promotes internalization of LRP5/6. DKKs play an important role in vertebrate development, where they locally inhibit Wnt regulated processes such as antero-posterior axial patterning, limb development, somitogenesis and eye formation. In the ad…	0.853938
g10357	-1.6079	3.70832	sp|Q9U3I4|EMRE_CAEEL	Essential regulatory subunit of the mitochondrial calcium uniporter (mcu-1) channel, a protein that mediates calcium uptake into mitochondria.	2.554e-08
g10358	0.194668	3.22549			0.461037
g10359	0.374979	3.02303	sp|Q38931|FKB62_ARATH	PPIases accelerate the folding of proteins. It catalyzes the cis-trans isomerization of proline imidic peptide bonds in oligopeptides (By similarity). Co-chaperone that positively modulates thermotolerance by interacting with HSP90.1 and increasing the HSFA2-mediated accumulation of chaperones of the small-HSPs family.	0.0606713
g1036	-1.65086	5.87646			1.05063e-09
g10360	-0.14572	1.71443			0.583852
g10361	0.385039	6.62114			8.54068e-05
g10362	-3.5187	8.57644			1.85952e-11
g10363	-1.6435	7.32082	sp|Q1D823|AGLZ_MYXXD	Required for adventurous-gliding motility (A motility), in response to environmental signals sensed by the frz chemosensory system. Forms ordered clusters that span the cell length and that remain stationary relative to the surface across which the cells move, serving as anchor points (focal, transient adhesion sites) that allow the bacterium to move forward. Clusters disassemble at the lagging c…	0.00177681
g10364	-2.16479	5.4086			3.46331e-08
g10365	0.301328	4.50523	sp|Q5R573|RBL2A_PONAB	Plays an essential role in male fertility, sperm intra-flagellar transport, and tail assembly. Binds, in a GTP-regulated manner, to a specific set of effector proteins including key proteins involved in cilia development and function and delivers them into the growing sperm tail.	0.0218884
g10366	0.302477	5.13937	sp|Q2T9N1|F1142_BOVIN		0.0319671
g10367	-0.208379	3.54205	sp|Q8CH40|NUDT6_MOUSE	May contribute to the regulation of cell proliferation.	0.229835
g10368	-0.373569	5.16624			0.0184273
g10369	-0.396517	3.77978	sp|Q24799|MYPH_ECHGR		0.020125
g1037	-3.0601	1.98651			6.75798e-11
g10370	-0.367087	2.38609	sp|Q96Q05|TPPC9_HUMAN	Functions as an activator of NF-kappa-B through increased phosphorylation of the IKK complex. May function in neuronal cells differentiation. May play a role in vesicular transport from endoplasmic reticulum to Golgi.	0.137444
g10377	-0.367905	3.04385	sp|Q32PH0|TPPC9_BOVIN	Functions as an activator of NF-kappa-B through increased phosphorylation of the IKK complex. May function in neuronal cells differentiation. May play a role in vesicular transport from endoplasmic reticulum to Golgi.	0.0479122
g10378	-0.148238	4.69824	sp|P79942|NOCT_XENLA	Component of the circadian clock or downstream effector of clock function. Exhibits a high amplitude circadian rhythm with maximal levels in early evening. In constant darkness or constant light, the amplitude of the rhythm decreases.	0.408845
g10379	-0.208439	2.29541	sp|Q8IRC7|AWH_DROME	Probable transcription factor. Required for the establishment of a subset of imaginal tissues: the abdominal histoblasts and the salivary gland imaginal rings.	0.364919
g10380	0.458743	5.00403	sp|P49919|CDN1C_MOUSE	Potent tight-binding inhibitor of several G1 cyclin/CDK complexes (cyclin E-CDK2, cyclin D2-CDK4, and cyclin A-CDK2) and, to lesser extent, of the mitotic cyclin B-CDC2. Negative regulator of cell proliferation. May play a role in maintenance of the non-proliferative state throughout life.	0.00122115
g10382	-0.595093	10.218			0.168772
g10385	0.368332	2.32279	sp|Q80SU7|GVIN1_MOUSE		0.134502
g10387	0.104669	6.5251	sp|Q8CIF6|SIDT2_MOUSE	Mediates the translocation of RNA and DNA across the lysosomal membrane during RNA and DNA autophagy (RDA), a process in which RNA and DNA is directly imported into lysosomes in an ATP-dependent manner, and degraded (PubMed:27046251, PubMed:27846365, PubMed:28724756). Involved in the uptake of single-stranded oligonucleotides by living cells, a process called gymnosis (PubMed:28277980). In vitro,…	0.374768
g10391	-0.0437121	4.39489	sp|P57716|NICA_MOUSE	Essential subunit of the gamma-secretase complex, an endoprotease complex that catalyzes the intramembrane cleavage of integral membrane proteins such as Notch receptors and APP (amyloid-beta precursor protein). The gamma-secretase complex plays a role in Notch and Wnt signaling cascades and regulation of downstream processes via its role in processing key regulatory proteins, and by regulating c…	0.725623
g10392	0.00992259	5.17995	sp|O35264|PA1B2_RAT	Inactivates PAF by removing the acetyl group at the sn-2 position. This is a catalytic subunit.	0.940815
g10394	-0.731111	1.03075			0.0251447
g10399	0.169091	4.49413	sp|O54698|S29A1_RAT	Mediates both influx and efflux of nucleosides across the membrane (equilibrative transporter). It is sensitive (ES) to low concentrations of the inhibitor nitrobenzylmercaptopurine riboside (NBMPR) and is sodium-independent. It has a higher affinity for adenosine. Resistant to dipyridamole and dilazep inhibition (anticancer chemotherapeutics drugs).	0.383238
g104	-0.807754	1.82944	sp|Q91V09|WDR13_MOUSE		0.0112089
g1040	-0.364011	0.682699			0.428577
g1041	-2.27982	2.97063			1.37152e-08
g10410	-0.371531	7.57041	sp|Q4H4B6|SCRIB_DANRE	Scaffold protein involved in different aspects of polarized cells differentiation regulating epithelial and neuronal morphogenesis. Regulates the caudal migration of the nVII motor neurons. Required for convergent extension movements during gastrulation.	0.0134189
g10411	0.493073	2.17987			0.123501
g10412	0.329534	2.09747	sp|P56380|AP4A_MOUSE	Asymmetrically hydrolyzes Ap4A to yield AMP and ATP. Plays a major role in maintaining homeostasis (By similarity).	0.190031
g10413	-0.296236	2.12964	sp|Q1L8G7|GATD1_DANRE		0.368194
g10419	-0.561307	0.852371			0.151809
g1042	-3.11956	1.97922			9.94728e-09
g10420	-0.413696	6.68304	sp|Q14160|SCRIB_HUMAN	Scaffold protein involved in different aspects of polarized cells differentiation regulating epithelial and neuronal morphogenesis. Most probably functions in the establishment of apico-basal cell polarity. May function in cell proliferation regulating progression from G1 to S phase and as a positive regulator of apoptosis for instance during acinar morphogenesis of the mammary epithelium. May al…	9.69822e-05
g10424	-0.0028981	5.43725	sp|A6QM06|SCAP_BOVIN	Escort protein required for cholesterol as well as lipid homeostasis. Regulates export of the SCAP/SREBF complex from the ER upon low cholesterol. Formation of a ternary complex with INSIG at high sterol concentrations leads to masking of an ER-export signal in SCAP and retention of the complex in the ER. Low sterol concentrations trigger release of INSIG, a conformational change in the SSC domai…	0.980488
g10427	0.219891	1.49139			0.481238
g10428	-1.21288	2.85932			1.85292e-07
g10437	-0.387124	4.89142	sp|G3V9H8|RET_RAT	Receptor tyrosine-protein kinase involved in numerous cellular mechanisms including cell proliferation, neuronal navigation, cell migration, and cell differentiation upon binding with glial cell derived neurotrophic factor family ligands. Phosphorylates PTK2/FAK1. Regulates both cell death/survival balance and positional information. Required for the molecular mechanisms orchestration during inte…	0.00350215
g10440	-0.296988	3.26055	sp|G3V9H8|RET_RAT	Receptor tyrosine-protein kinase involved in numerous cellular mechanisms including cell proliferation, neuronal navigation, cell migration, and cell differentiation upon binding with glial cell derived neurotrophic factor family ligands. Phosphorylates PTK2/FAK1. Regulates both cell death/survival balance and positional information. Required for the molecular mechanisms orchestration during inte…	0.124808
g10458	3.63518	0.3937	sp|Q18775|DOPR4_CAEEL	Receptor for dopamine. The activity of this receptor is mediated by G proteins which activate adenylyl cyclase. In terms of antagonist responses, would be classed with the D1-like dopamine receptor group.	3.36772e-07
g1046	-2.53237	0.492774			1.67784e-05
g10464	0.547208	2.08316	sp|Q3MV19|TRF6A_XENLA	E3 ubiquitin-protein ligase that mediates ubiquitination of proteins. Adapter protein that seems to play a role in signal transduction.	0.0150505
g10475	-1.25168	1.96633			3.65176e-05
g10482	0.588027	8.24925	sp|Q62829|PAK3_RAT	Serine/threonine protein kinase that plays a role in a variety of different signaling pathways including cytoskeleton regulation, cell migration, or cell cycle regulation. Plays a role in dendrite spine morphogenesis as well as synapse formation and plasticity. Acts as downstream effector of the small GTPases CDC42 and RAC1. Activation by the binding of active CDC42 and RAC1 results in a conforma…	1.23769e-07
g10483	0.0743668	1.12547	sp|Q5XXP2|OPN4_PHOSU	Photoreceptor required for regulation of circadian rhythm. Contributes to pupillar reflex and other non-image forming responses to light. May be able to isomerize covalently bound all-trans retinal back to 11-cis retinal (By similarity).	0.852981
g10484	0.114474	3.60492	sp|Q6DF08|UXS1_XENTR	Catalyzes the NAD-dependent decarboxylation of UDP-glucuronic acid to UDP-xylose. Necessary for the biosynthesis of the core tetrasaccharide in glycosaminoglycan biosynthesis (By similarity).	0.441045
g10485	0.917599	4.11957			3.16054e-08
g10487	0.0148342	1.76667			0.969397
g10491	0.188575	5.99031			0.140835
g10493	-0.0944782	5.98301	sp|Q6DGP4|NFI1L_DANRE	May play a role in Golgi structure maintenance.	0.507797
g10494	0.48018	4.20022	sp|A7RWC9|ITPA_NEMVE	Pyrophosphatase that hydrolyzes non-canonical purine nucleotides such as inosine triphosphate (ITP), deoxyinosine triphosphate (dITP) or xanthosine 5'-triphosphate (XTP) to their respective monophosphate derivatives. The enzyme does not distinguish between the deoxy- and ribose forms. Probably excludes non-canonical purines from RNA and DNA precursor pools, thus preventing their incorporation int…	0.00129553
g10498	0.0618848	1.69589	sp|O93603|TRFR_CHICK	Receptor for thyrotropin-releasing hormone. This receptor is mediated by G proteins which activate a phosphatidylinositol-calcium second messenger system.	0.808867
g10499	-0.637101	9.46721			0.000150148
g105	-0.00739496	2.86748	sp|Q6DKP5|WDR13_PANTR		0.970837
g1050	-0.551872	1.47056			0.067628
g10500	-0.140284	6.18449			0.209224
g10501	-0.281358	2.52143	sp|Q6DGL2|KBRS2_DANRE	Atypical Ras-like protein that acts as a potent regulator of NF-kappa-B activity by preventing the degradation of NF-kappa-B inhibitor beta (NFKBIB) by most signals, explaining why NFKBIB is more resistant to degradation.	0.243316
g10502	0.271073	4.34247			0.108219
g10506	0.166495	3.53819			0.328098
g10509	0.192888	5.6256	sp|B0K020|CISD1_RAT	Plays a key role in regulating maximal capacity for electron transport and oxidative phosphorylation. May be involved in Fe-S cluster shuttling and/or in redox reactions.	0.200684
g10511	-0.338991	3.37558	sp|Q8CFV2|F149A_MOUSE		0.0497099
g10512	0.854306	5.97683	sp|P54145|AMT1_CAEEL	Involved in the uptake of ammonia.	5.7775e-09
g10513	0.728513	6.29776	sp|Q9DB27|MCTS1_MOUSE	Anti-oncogene that plays a role in cell cycle regulation; decreases cell doubling time and anchorage-dependent growth; shortens the duration of G1 transit time and G1/S transition. When constitutively expressed, increases CDK4 and CDK6 kinases activity and CCND1/cyclin D1 protein level, as well as G1 cyclin/CDK complex formation. Involved in translation initiation; promotes recruitment of aminoac…	2.42457e-08
g10514	0.200637	8.81588	sp|Q6PFL8|THYN1_DANRE	Specifically binds 5-hydroxymethylcytosine (5hmC), suggesting that it acts as a specific reader of 5hmC.	0.0662506
g10515	0.0240049	3.84468	sp|Q28DE6|RSBNL_XENTR	Lysine-specific demethylase that specifically demethylates methylated lysine residues of proteins.	0.879195
g10516	-0.379875	4.44745	sp|Q4FZV0|MANBA_RAT	Exoglycosidase that cleaves the single beta-linked mannose residue from the non-reducing end of all N-linked glycoprotein oligosaccharides.	0.013703
g10517	0.901629	5.45891	sp|P55115|NAS15_CAEEL	Metalloprotease.	2.67913e-08
g10519	1.00837	7.05397	sp|Q7Z3G6|PRIC2_HUMAN		2.05952e-10
g10520	-0.0883307	2.70861	sp|Q8CH62|ORAV1_MOUSE	The complex LTO1:YAE1 functions as a target specific adapter that probably recruits apo-ABCE1 to the cytosolic iron-sulfur protein assembly (CIA) complex machinery. May be required for biogenesis of the large ribosomal subunit and initiation of translation. May play a role in the regulation of proline metabolism and ROS production.	0.639829
g10525	-0.264107	4.58653	sp|Q9Y2L1|RRP44_HUMAN	Putative catalytic component of the RNA exosome complex which has 3'->5' exoribonuclease activity and participates in a multitude of cellular RNA processing and degradation events. In the nucleus, the RNA exosome complex is involved in proper maturation of stable RNA species such as rRNA, snRNA and snoRNA, in the elimination of RNA processing by-products and non-coding 'pervasive' transcripts, su…	0.0430253
g10527	-0.389326	6.24527	sp|Q9CSH3|RRP44_MOUSE	Putative catalytic component of the RNA exosome complex which has 3'->5' exoribonuclease activity and participates in a multitude of cellular RNA processing and degradation events. In the nucleus, the RNA exosome complex is involved in proper maturation of stable RNA species such as rRNA, snRNA and snoRNA, in the elimination of RNA processing by-products and non-coding 'pervasive' transcripts, su…	0.00254089
g10529	-1.25245	5.95114			3.78819e-07
g1053	-0.06887	2.59031			0.755966
g10530	0.120745	1.09221	sp|Q17RP2|TIGD6_HUMAN		0.79372
g10534	0.370109	4.49116	sp|O57478|HEMH_XENLA	Catalyzes the ferrous insertion into protoporphyrin IX.	0.00273127
g10535	-0.514801	4.85353	sp|Q9WVG9|MS3L1_MOUSE	Has a role in chromatin remodeling and transcriptional regulation. Has a role in X inactivation. Component of the MSL complex which is responsible for the majority of histone H4 acetylation at 'Lys-16' which is implicated in the formation of higher-order chromatin structure. Specifically recognizes histone H4 monomethylated at 'Lys-20' (H4K20Me1) in a DNA-dependent manner and is proposed to be in…	0.000160251
g10536	-0.569834	6.12422	sp|Q08874|MITF_MOUSE	Transcription factor that regulates the expression of genes with essential roles in cell differentiation, proliferation and survival. Binds to M-boxes (5'-TCATGTG-3') and symmetrical DNA sequences (E-boxes) (5'-CACGTG-3') found in the promoters of target genes, such as BCL2 and tyrosinase (TYR) (PubMed:23207919). Plays an important role in melanocyte development by regulating the expression of ty…	2.37975e-05
g10537	-0.0783017	2.99507	sp|Q8VC42|MIC1_MOUSE	Componement of the CCZ1-MON1 RAB7A guanine exchange factor (GEF). Acts as a positive regulator of CCZ1-MON1A/B function necessary for endosomal/autophagic flux and efficient RAB7A localization.	0.780953
g10540	0.651111	10.8726	sp|Q0Z8U2|RS3_PIG	Involved in translation as a component of the 40S small ribosomal subunit. Has endonuclease activity and plays a role in repair of damaged DNA. Cleaves phosphodiester bonds of DNAs containing altered bases with broad specificity and cleaves supercoiled DNA more efficiently than relaxed DNA. Displays high binding affinity for 7,8-dihydro-8-oxoguanine (8-oxoG), a common DNA lesion caused by reactiv…	2.14678e-07
g10541	0.112419	1.05504			0.795077
g10543	0.469563	10.6866	sp|P62907|RL10A_RAT	Component of the large ribosomal subunit.	1.90155e-05
g10545	0.603916	1.66765			0.0185046
g10546	0.240921	4.59285	sp|O18883|TXND9_BOVIN	Significantly diminishes the chaperonin TCP1 complex ATPase activity, thus negatively impacts protein folding, including that of actin or tubulin.	0.0382333
g10550	0.80145	0.824309			0.562545
g10556	0.225574	8.80275	sp|P49010|HEXC_BOMMO	Active during metamorphosis to degrade chitin.	0.0254097
g10560	-1.19669	3.49213	sp|Q9D7M8|RPB4_MOUSE	DNA-dependent RNA polymerase catalyzes the transcription of DNA into RNA using the four ribonucleoside triphosphates as substrates. Component of RNA polymerase II which synthesizes mRNA precursors and many functional non-coding RNAs. Pol II is the central component of the basal RNA polymerase II transcription machinery. It is composed of mobile elements that move relative to each other. RPB4 is p…	0.00366719
g10565	0.810472	12.5486	sp|Q9WVM4|ICMT_RAT	Catalyzes the post-translational methylation of isoprenylated C-terminal cysteine residues.	1.05721e-08
g10568	0.0764939	5.26805	sp|Q9W590|LSG1_DROME	GTPase required for the nuclear export of the 60S ribosomal subunit. Probably acts by mediating the release of Nmd3 from the 60S ribosomal subunit after export into the cytoplasm. Regulator of body size; acts in serotonergic neurons to regulate insulin signaling and thus exerts global growth control.	0.479061
g10569	-0.501998	4.15111			0.0247273
g10572	-2.87459	2.42312			4.03762e-10
g10574	-0.148826	4.12268	sp|A7RR04|EFGM_NEMVE	Mitochondrial GTPase that catalyzes the GTP-dependent ribosomal translocation step during translation elongation. During this step, the ribosome changes from the pre-translocational (PRE) to the post-translocational (POST) state as the newly formed A-site-bound peptidyl-tRNA and P-site-bound deacylated tRNA move to the P and E sites, respectively. Catalyzes the coordinated movement of the two tRN…	0.373588
g10575	-0.241698	5.53141	sp|A7RR04|EFGM_NEMVE	Mitochondrial GTPase that catalyzes the GTP-dependent ribosomal translocation step during translation elongation. During this step, the ribosome changes from the pre-translocational (PRE) to the post-translocational (POST) state as the newly formed A-site-bound peptidyl-tRNA and P-site-bound deacylated tRNA move to the P and E sites, respectively. Catalyzes the coordinated movement of the two tRN…	0.0554071
g10576	-0.250987	2.01785			0.484045
g10578	-0.335749	0.836852	sp|Q804T6|DIX1A_DANRE	Functions as a positive effector of the Wnt signaling pathway regulating antero-posterior neural patterning.	0.498247
g10580	-0.0839184	4.67605	sp|H2LBU8|YAP1_ORYLA	Transcriptional regulator which can act both as a coactivator and a corepressor and is the critical downstream regulatory target in the Hippo signaling pathway that plays a pivotal role in organ size control and tumor suppression by restricting proliferation and promoting apoptosis (By similarity). Plays a key role in tissue tension and 3D tissue shape by regulating cortical actomyosin network fo…	0.455838
g10581	2.43693	7.57938	sp|P02264|H2A_ONCMY	Core component of nucleosome. Nucleosomes wrap and compact DNA into chromatin, limiting DNA accessibility to the cellular machineries which require DNA as a template. Histones thereby play a central role in transcription regulation, DNA repair, DNA replication and chromosomal stability. DNA accessibility is regulated via a complex set of post-translational modifications of histones, also called h…	2.15858e-17
g10585	1.39791	3.82369	sp|Q8IZJ1|UNC5B_HUMAN	Receptor for netrin required for axon guidance. Mediates axon repulsion of neuronal growth cones in the developing nervous system upon ligand binding. Axon repulsion in growth cones may be caused by its association with DCC that may trigger signaling for repulsion (By similarity). Functions as netrin receptor that negatively regulates vascular branching during angiogenesis. Mediates retraction of…	4.58674e-07
g10588	-0.0917037	3.3069	sp|Q9V785|3BP5H_DROME		0.683858
g1059	0.489566	2.65979	sp|P61214|ARL4A_RAT	Small GTP-binding protein which cycles between an inactive GDP-bound and an active GTP-bound form, and the rate of cycling is regulated by guanine nucleotide exchange factors (GEF) and GTPase-activating proteins (GAP). GTP-binding protein that does not act as an allosteric activator of the cholera toxin catalytic subunit. Recruits CYTH1, CYTH2, CYTH3 and CYTH4 to the plasma membrane in GDP-bound …	0.0115027
g10590	0.0343353	8.92252	sp|P39447|ZO1_MOUSE	Tjp1, TjpP2, and Tjp3 are closely related scaffolding proteins that link tight junction (TJ) transmembrane proteins such as claudins, junctional adhesion molecules, and occludin to the actin cytoskeleton (By similarity). The tight junction acts to limit movement of substances through the paracellular space and as a boundary between the compositionally distinct apical and basolateral plasma membra…	0.848806
g10591	-0.631936	4.25509	sp|Q499N2|AP5M1_RAT	As part of AP-5, a probable fifth adaptor protein complex it may be involved in endosomal transport.	2.43157e-05
g10592	0.494359	4.72914	sp|Q5ZI51|ARHL2_CHICK	ADP-ribose glycohydrolase that preferentially hydrolyzes the scissile alpha-O-linkage attached to the anomeric C1'' position of ADP-ribose and acts on different substrates, such as proteins ADP-ribosylated on serine, free poly(ADP-ribose) and O-acetyl-ADP-D-ribose. Specifically acts as a serine mono-ADP-ribosylhydrolase by mediating the removal of mono-ADP-ribose attached to serine residues on pr…	7.54662e-05
g10594	0.782716	6.24046	sp|O35426|XBP1_MOUSE	Functions as a transcription factor during endoplasmic reticulum stress by regulating the unfolded protein response (UPR). Required for cardiac myogenesis and hepatogenesis during embryonic development and the development of secretory tissues such as exocrine pancreas and salivary gland (PubMed:10425189, PubMed:10652269, PubMed:16362047, PubMed:17612490). Involved in differentiation of B lymphocy…	2.90665e-08
g10598	-0.118877	3.97615	sp|P09760|FER_RAT	Tyrosine-protein kinase that acts downstream of cell surface receptors for growth factors and plays a role in the regulation of the actin cytoskeleton, microtubule assembly, lamellipodia formation, cell adhesion, cell migration and chemotaxis. Acts downstream of EGFR, KIT, PDGFRA and PDGFRB. Acts downstream of EGFR to promote activation of NF-kappa-B and cell proliferation. May play a role in the…	0.352252
g106	-0.393306	2.60715	sp|Q9LS45|PCR5_ARATH	May be involved in heavy metals transport.	0.128568
g10604	0.137314	10.7536	sp|P49715|CEBPA_HUMAN	Transcription factor that coordinates proliferation arrest and the differentiation of myeloid progenitors, adipocytes, hepatocytes, and cells of the lung and the placenta. Binds directly to the consensus DNA sequence 5'-T[TG]NNGNAA[TG]-3' acting as an activator on distinct target genes (PubMed:11242107). During early embryogenesis, plays essential and redundant functions with CEBPB. Essential for…	0.222104
g10605	-0.949883	2.82496	sp|P35072|TCB1_CAEBR	Probably essential for transposable element Tcb1 transposition. The insertion of Tcb1 is the main cause of spontaneous mutations.	1.33138e-05
g10606	0.0453444	4.93285	sp|O15381|NVL_HUMAN	Participates in the assembly of the telomerase holoenzyme and effecting of telomerase activity via its interaction with TERT (PubMed:22226966). Involved in both early and late stages of the pre-rRNA processing pathways (PubMed:26166824). Spatiotemporally regulates 60S ribosomal subunit biogenesis in the nucleolus (PubMed:15469983, PubMed:16782053, PubMed:29107693, PubMed:26456651). Catalyzes the …	0.746867
g10609	-1.11706	1.37813			0.0145023
g10616	-0.646309	6.62928	sp|Q80U35|ARHGH_MOUSE	Acts as guanine nucleotide exchange factor (GEF) for RhoA GTPases.	0.000376401
g1062	0.426435	0.301435			0.343221
g10620	-0.286153	1.21452			0.533111
g10621	-0.321935	2.66708	sp|A1L1R5|PTPC1_DANRE	May play roles in cilia formation and/or maintenance.	0.0844667
g10622	0.65952	3.70437	sp|Q766D5|B4GN4_MOUSE	Transfers N-acetylgalactosamine (GalNAc) from UDP-GalNAc to N-acetylglucosamine-beta-benzyl with a beta-1,4-linkage to form N,N'-diacetyllactosediamine, GalNAc-beta-1,4-GlcNAc structures in N-linked glycans and probably O-linked glycans.	0.000595534
g1063	0.613195	3.45189	sp|P0DN09|VKT5_ANEVI	Dual-function toxin that inhibits both the serine protease trypsin (Kd=30 nM) and voltage-gated potassium channels Kv1.2/KCNA2 (IC(50)=2800 nM).	0.0246635
g10637	0.475571	3.71539	sp|Q766D5|B4GN4_MOUSE	Transfers N-acetylgalactosamine (GalNAc) from UDP-GalNAc to N-acetylglucosamine-beta-benzyl with a beta-1,4-linkage to form N,N'-diacetyllactosediamine, GalNAc-beta-1,4-GlcNAc structures in N-linked glycans and probably O-linked glycans.	0.00417856
g1064	-0.0193913	5.88972	sp|Q28864|TFPI1_MACMU	Inhibits factor X (X(a)) directly and, in a Xa-dependent way, inhibits VIIa/tissue factor activity, presumably by forming a quaternary Xa/LACI/VIIa/TF complex. It possesses an antithrombotic action and also the ability to associate with lipoproteins in plasma.	0.936477
g10640	-0.37587	4.26375	sp|Q7T0P7|ATP23_XENLA		0.0752792
g10641	-0.022746	6.47718	sp|Q6DIN3|MBTD1_XENTR	Putative Polycomb group (PcG) protein. PcG proteins maintain the transcriptionally repressive state of genes, probably via a modification of chromatin, rendering it heritably changed in its expressibility. Specifically binds to monomethylated and dimethylated 'Lys-20' on histone H4 (By similarity).	0.842348
g10645	0.105552	6.18507	sp|Q6DIN3|MBTD1_XENTR	Putative Polycomb group (PcG) protein. PcG proteins maintain the transcriptionally repressive state of genes, probably via a modification of chromatin, rendering it heritably changed in its expressibility. Specifically binds to monomethylated and dimethylated 'Lys-20' on histone H4 (By similarity).	0.298092
g10646	0.0350259	5.77781	sp|A6QLT2|MTMR2_BOVIN	Phosphatase that acts on lipids with a phosphoinositol headgroup. Has phosphatase activity towards phosphatidylinositol 3-phosphate and phosphatidylinositol 3,5-bisphosphate (By similarity). Binds phosphatidylinositol 4-phosphate, phosphatidylinositol 5-phosphate, phosphatidylinositol 3,5-bisphosphate and phosphatidylinositol 3,4,5-trisphosphate. Stabilizes SBF2/MTMR13 at the membranes. Specifica…	0.711212
g10648	-0.0427974	3.2237	sp|Q5R7P4|BGAL_PONAB	Cleaves beta-linked terminal galactosyl residues from gangliosides, glycoproteins, and glycosaminoglycans.	0.80766
g10649	-0.491356	4.82058	sp|Q9VJ79|PDE11_DROME	Plays a role in signal transduction by regulating the intracellular concentration of cyclic nucleotides cAMP and cGMP. Catalyzes the hydrolysis of both cAMP and cGMP to 5'-AMP and 5'-GMP, respectively.	2.5103e-05
g10650	0.75862	4.42906	sp|Q7LL04|YQK1_SCHPO		3.77334e-07
g10652	-0.742426	0.662466			0.0937407
g10654	-0.332888	3.05482			0.0804983
g1066	-0.366001	4.45442	sp|Q9D0F6|RFC5_MOUSE	The elongation of primed DNA templates by DNA polymerase delta and epsilon requires the action of the accessory proteins proliferating cell nuclear antigen (PCNA) and activator 1.	0.0280685
g10666	-0.327546	1.21062			0.322653
g1067	0.329595	2.66032			0.123402
g10676	-0.622376	1.54397	sp|A2AJ76|HMCN2_MOUSE		0.0192772
g10677	-0.949447	2.31846	sp|Q8VIG3|RSPH1_MOUSE	The specific expression during male germ cell development and its characteristic localization suggest that it may play an important role in male meiosis. It is necessary for proper building of the axonemal central pair and radial spokes (By similarity).	0.000137503
g10678	-0.57994	3.65814	sp|O35594|IFT81_MOUSE	Component of the intraflagellar transport (IFT) complex B: together with IFT74, forms a tubulin-binding module that specifically mediates transport of tubulin within the cilium. Binds tubulin via its CH (calponin-homology)-like region. Required for ciliogenesis. Required for proper regulation of SHH signaling.	0.00131062
g10680	3.29926	8.58937	sp|H2A0N9|KCP4_PINMG		5.65327e-17
g10681	0.271555	2.65483	sp|P0CJ14|VP302_LYCMC		0.186783
g10687	0.52796	5.83473	sp|Q3SZB4|ACADM_BOVIN	Acyl-CoA dehydrogenase specific for acyl chain lengths of 4 to 16 that catalyzes the initial step of fatty acid beta-oxidation. Utilizes the electron transfer flavoprotein (ETF) as an electron acceptor to transfer electrons to the main mitochondrial respiratory chain via ETF-ubiquinone oxidoreductase (ETF dehydrogenase).	3.81661e-05
g10688	-0.442083	3.77456	sp|Q5EBP3|ARMC5_MOUSE	Involved in fetal development, T-cell function and adrenal gland growth homeostasis (PubMed:28169274). Negatively regulates adrenal cells survival. Plays a role in steroidogenesis, modulates steroidogenic enzymes expression and cortisol production (By similarity).	0.00480485
g10689	-0.370341	1.92743	sp|Q94420|MEL26_CAEEL	Probable substrate-specific adapter of an E3 ubiquitin-protein ligase complex which mediates the ubiquitination and subsequent proteasomal degradation of target proteins (PubMed:14528312, PubMed:13679922, PubMed:23918937). Controls degradation of microtubule severing protein mei-1 after meiosis (PubMed:14528312). Controls degradation of ppfr-1, the regulatory subunit of PP4 complex, after meiosis…	0.218695
g10690	0.592458	6.34711	sp|Q91ZQ0|VMP1_RAT	Stress-induced protein that, when overexpressed, promotes formation of intracellular vacuoles followed by cell death (PubMed:11785947). May be involved in the cytoplasmic vacuolization of acinar cells during the early stage of acute pancreatitis (PubMed:12649568, PubMed:15367889). Involved in cell-cell adhesion (By similarity). Plays an essential role in formation of cell junctions (By similarity…	1.27e-06
g10693	0.564116	2.037			0.0323623
g10694	-0.281011	1.42778	sp|P79282|FUT8_PIG	Catalyzes the addition of fucose in alpha 1-6 linkage to the first GlcNAc residue, next to the peptide chains in N-glycans.	0.397445
g10696	-0.291465	5.34483	sp|Q5ZLD7|VPS53_CHICK	Acts as component of the GARP complex that is involved in retrograde transport from early and late endosomes to the trans-Golgi network (TGN). Acts as component of the EARP complex that is involved in endocytic recycling.	0.0137712
g10697	0.116352	6.40939			0.308994
g10699	-0.353663	6.18609	sp|Q9DBG3|AP2B1_MOUSE	Component of the adaptor protein complex 2 (AP-2). Adaptor protein complexes function in protein transport via transport vesicles in different membrane traffic pathways. Adaptor protein complexes are vesicle coat components and appear to be involved in cargo selection and vesicle formation. AP-2 is involved in clathrin-dependent endocytosis in which cargo proteins are incorporated into vesicles s…	0.0163917
g107	0.504239	4.27031	sp|P97765|WBP2_MOUSE	Acts as transcriptional coactivator of estrogen and progesterone receptors (ESR1 and PGR) upon hormone activation. In presence of estrogen, binds to ESR1-responsive promoters. Required for YAP1 coactivation function on PGR activity. Synergizes with WBP2 in enhancing PGR activity (By similarity). Modulates expression of post-synaptic scaffolding proteins via regulation of ESR1, ESR2 and PGR (PubMe…	0.00253848
g10700	-0.0402827	3.52002	sp|Q0VH32|MNT_XENLA	Binds DNA as a heterodimer with MAX and represses transcription. Binds to the canonical E box sequence 5'-CACGTG-3' and, with higher affinity, to 5'-CACGCG-3' (By similarity).	0.822685
g10703	0.246012	0.948283	sp|E9Q5R7|NAL12_MOUSE	Plays an essential role as an potent mitigator of inflammation (PubMed:26521018, PubMed:30559449). Primarily expressed in dendritic cells and macrophages, inhibits both canonical and non-canonical NF-kappa-B and ERK activation pathways (PubMed:30559449). Functions as a negative regulator of NOD2 by targeting it to degradation via the proteasome pathway (PubMed:30559449). In turn, promotes bacteri…	0.441932
g10704	0.242496	8.00635	sp|Q9DBG3|AP2B1_MOUSE	Component of the adaptor protein complex 2 (AP-2). Adaptor protein complexes function in protein transport via transport vesicles in different membrane traffic pathways. Adaptor protein complexes are vesicle coat components and appear to be involved in cargo selection and vesicle formation. AP-2 is involved in clathrin-dependent endocytosis in which cargo proteins are incorporated into vesicles s…	0.0242803
g10705	-0.206471	9.06295	sp|Q99PV0|PRP8_MOUSE	Plays role in pre-mRNA splicing as core component of precatalytic, catalytic and postcatalytic spliceosomal complexes, both of the predominant U2-type spliceosome and the minor U12-type spliceosome. Functions as a scaffold that mediates the ordered assembly of spliceosomal proteins and snRNAs. Required for the assembly of the U4/U6-U5 tri-snRNP complex, a building block of the spliceosome. Functi…	0.0762576
g10706	-0.447944	5.31953	sp|P0CP96|FKBP2_CRYNJ	PPIases accelerate the folding of proteins. It catalyzes the cis-trans isomerization of proline imidic peptide bonds in oligopeptides (By similarity).	6.16831e-05
g10708	0.44925	4.36083	sp|B9KL80|RL1_RHOSK	Binds directly to 23S rRNA. The L1 stalk is quite mobile in the ribosome, and is involved in E site tRNA release.	0.00112031
g10709	0.564309	4.21262			0.000169345
g1071	-0.089823	5.42914	sp|A7S4N4|SERIC_NEMVE	Enhances the incorporation of serine into phosphatidylserine and sphingolipids.	0.459597
g10710	0.34496	6.68988	sp|Q9TVC1|VATH_PIG	Subunit of the peripheral V1 complex of vacuolar ATPase. Subunit H activates the ATPase activity of the enzyme and couples ATPase activity to proton flow. Vacuolar ATPase is responsible for acidifying a variety of intracellular compartments in eukaryotic cells, thus providing most of the energy required for transport processes in the vacuolar system. Involved in the endocytosis mediated by clathr…	0.000475104
g10711	-0.901076	6.36844			1.9643e-06
g10713	-0.57714	2.00568	sp|Q7T0Y4|DRC1_XENLA	Component of the nexin-dynein regulatory complex (N-DRC) a key regulator of ciliary/flagellar motility which maintains the alignment and integrity of the distal axoneme and regulates microtubule sliding in motile axonemes. Plays a critical role in the assembly of N-DRC and also stabilizes the assembly of multiple inner dynein arms and radial spokes. Coassembles with CCDC65/DRC2 to form a central …	0.0648584
g10718	-0.381265	3.19716			0.0689276
g1072	-0.1063	3.41315	sp|Q8WW35|TC1D2_HUMAN	Required for proper retrograde ciliary transport.	0.594917
g10720	0.27583	4.14551	sp|Q9Z1A5|ULA1_RAT	Regulatory subunit of the dimeric UBA3-NAE1 E1 enzyme. E1 activates NEDD8 by first adenylating its C-terminal glycine residue with ATP, thereafter linking this residue to the side chain of the catalytic cysteine, yielding a NEDD8-UBA3 thioester and free AMP. E1 finally transfers NEDD8 to the catalytic cysteine of UBE2M. Necessary for cell cycle progression through the S-M checkpoint. Overexpressi…	0.111965
g10721	1.29625	3.1453			2.50928e-07
g10722	-0.853081	6.12675	sp|P78316|NOP14_HUMAN	Involved in nucleolar processing of pre-18S ribosomal RNA. Has a role in the nuclear export of 40S pre-ribosomal subunit to the cytoplasm (By similarity).	1.69638e-06
g10723	-0.0984911	3.781	sp|P78316|NOP14_HUMAN	Involved in nucleolar processing of pre-18S ribosomal RNA. Has a role in the nuclear export of 40S pre-ribosomal subunit to the cytoplasm (By similarity).	0.620837
g10724	0.242542	3.52183			0.122188
g10725	0.364123	5.0424	sp|Q2HJ10|ZNT2_MOUSE		0.00272903
g1073	-0.356485	6.25328	sp|Q9Y6X9|MORC2_HUMAN	Essential for epigenetic silencing by the HUSH (human silencing hub) complex. Recruited by HUSH to target site in heterochromatin, the ATPase activity and homodimerization are critical for HUSH-mediated silencing (PubMed:28581500, PubMed:29440755). Represses germ cell-related genes and L1 retrotransposons in collaboration with SETDB1 and the HUSH complex, the silencing is dependent of repressive …	0.00590203
g10736	0.268573	5.38014	sp|P57709|AT2C1_BOVIN	This magnesium-dependent enzyme catalyzes the hydrolysis of ATP coupled with the transport of calcium.	0.00596533
g10737	0.876217	6.69522	sp|D4AK17|PLCX1_ARTBC		2.63918e-09
g10738	0.456323	10.368	sp|O93477|SAHHB_XENLA	Adenosylhomocysteine is a competitive inhibitor of S-adenosyl-L-methionine-dependent methyl transferase reactions; therefore adenosylhomocysteinase may play a key role in the control of methylations via regulation of the intracellular concentration of adenosylhomocysteine.	0.00361412
g10739	1.30798	4.91554	sp|O75506|HSBP1_HUMAN	Negative regulator of the heat shock response. Negatively affects HSF1 DNA-binding activity. May have a role in the suppression of the activation of the stress response during the aging process.	3.23632e-09
g1074	-0.61555	3.81542	sp|Q9Y6X9|MORC2_HUMAN	Essential for epigenetic silencing by the HUSH (human silencing hub) complex. Recruited by HUSH to target site in heterochromatin, the ATPase activity and homodimerization are critical for HUSH-mediated silencing (PubMed:28581500, PubMed:29440755). Represses germ cell-related genes and L1 retrotransposons in collaboration with SETDB1 and the HUSH complex, the silencing is dependent of repressive …	0.000328965
g10740	-0.422624	5.09093	sp|P41154|HSF_XENLA	DNA-binding protein that specifically binds heat shock promoter elements (HSE) and activates transcription.	0.000319578
g10742	-1.09298	1.82712			0.000268543
g10745	-0.82155	1.30473	sp|Q10235|ALP11_SCHPO	Required for microtubule function and cell polarity. Involved in the proper folding of alpha-tubulin.	0.010883
g1075	0.030016	1.22172			0.945684
g10750	-0.941306	1.99277	sp|P61315|G3ST3_MOUSE	Transfers a sulfate to position 3 of non-reducing beta-galactosyl residues in N-glycans and core2-branched O-glycans. Has high activity towards Gal-beta-1,4-GlcNAc, Gal-beta-1,4(Fuc-alpha-1,3)GlcNAc and lower activity towards Gal-beta-1,3(Fuc-alpha-1,4)GlcNAc (By similarity).	0.000554357
g10762	-1.14131	0.56666			0.0203092
g10766	0.457749	1.14177	sp|Q8BMT9|HHAT_MOUSE	Catalyzes N-terminal palmitoylation of SHH; which is required for SHH signaling during limb development. May bind GTP.	0.169647
g10767	-0.268839	4.41628	sp|Q9SZW4|HMA2_ARATH	Plays an important role in zinc transport and homeostasis. Could also be involved in cadmium detoxification.	0.024114
g1077	-0.0464181	1.68291	sp|F4HRJ4|M3K3A_ARATH		0.878785
g10774	-0.610299	3.57939	sp|Q9BT88|SYT11_HUMAN	May be involved in Ca(2+)-dependent exocytosis of secretory vesicles through Ca(2+) and phospholipid binding to the C2 domain or may serve as Ca(2+) sensors in the process of vesicular trafficking and exocytosis.	0.00202149
g10775	-0.388447	1.08157			0.188571
g10778	-0.362713	8.7376	sp|Q9HC84|MUC5B_HUMAN	Gel-forming mucin that is thought to contribute to the lubricating and viscoelastic properties of whole saliva and cervical mucus.	0.0564892
g10779	0.758259	0.601255	sp|Q5EA92|AL14E_BOVIN	Through its interaction with ARL14 and MYO1E, may connect MHC class II-containing cytoplasmic vesicles to the actin network and hence controls the movement of these vesicles along the actin cytoskeleton in dendritic cells.	0.199405
g1078	-0.968925	2.17067	sp|F4HRJ4|M3K3A_ARATH		0.000147816
g10782	-0.278797	3.51082	sp|Q60700|M3K12_MOUSE	Protein kinase which is part of a non-canonical MAPK signaling pathway (PubMed:7983011, PubMed:8663324, PubMed:28111074). Activated by APOE, enhances the AP-1-mediated transcription of APP, via a MAP kinase signal transduction pathway composed of MAP2K7 and MAPK1/ERK2 and MAPK3/ERK1 (PubMed:28111074). May be an activator of the JNK/SAPK pathway.	0.0468085
g10786	-0.611872	1.171			0.0786546
g10787	0.175074	4.4547	sp|D3ZHA0|FLNC_RAT	Muscle-specific filamin, which plays a central role in muscle cells, probably by functioning as a large actin-cross-linking protein. May be involved in reorganizing the actin cytoskeleton in response to signaling events, and may also display structural functions at the Z lines in muscle cells. Critical for normal myogenesis and for maintaining the structural integrity of the muscle fibers.	0.106391
g10788	-2.34925	7.79317	sp|O60229|KALRN_HUMAN	Promotes the exchange of GDP by GTP. Activates specific Rho GTPase family members, thereby inducing various signaling mechanisms that regulate neuronal shape, growth, and plasticity, through their effects on the actin cytoskeleton. Induces lamellipodia independent of its GEF activity.	4.40288e-09
g10789	-2.65315	6.32092	sp|Q8WZ42|TITIN_HUMAN	Key component in the assembly and functioning of vertebrate striated muscles. By providing connections at the level of individual microfilaments, it contributes to the fine balance of forces between the two halves of the sarcomere. The size and extensibility of the cross-links are the main determinants of sarcomere extensibility properties of muscle. In non-muscle cells, seems to play a role in c…	1.80522e-08
g10790	-1.73605	5.17987	sp|O02827|MYLK_SHEEP	Calcium/calmodulin-dependent myosin light chain kinase implicated in smooth muscle contraction via phosphorylation of myosin light chains (MLC). Also regulates actin-myosin interaction through a non-kinase activity. Phosphorylates PTK2B/PYK2 and myosin light-chains. Involved in the inflammatory response (e.g. apoptosis, vascular permeability, leukocyte diapedesis), cell motility and morphology, a…	3.96e-08
g10791	-0.13821	2.88665			0.511476
g10792	-0.326735	4.72065	sp|Q3UM45|PP1R7_MOUSE	Regulatory subunit of protein phosphatase 1.	0.0857336
g10793	-0.385327	3.9225	sp|Q08D99|TM41A_BOVIN		0.0302357
g10794	0.938664	2.59626	sp|Q78RX3|SIM12_MOUSE		0.000245027
g10796	-0.218259	3.80375	sp|Q84PB3|IF4G1_ORYSJ	Plays a role in the accumulation of a sobemovirus (RYMV) during viral infection.	0.359103
g10797	1.64895	1.84366			2.582e-05
g1080	-0.593286	0.446553			0.172296
g10800	0.315237	3.90835	sp|Q2TBU3|GOSR1_BOVIN	Involved in transport from the ER to the Golgi apparatus as well as in intra-Golgi transport. It belongs to a super-family of proteins called t-SNAREs or soluble NSF (N-ethylmaleimide-sensitive factor) attachment protein receptor. May play a protective role against hydrogen peroxide induced cytotoxicity under glutathione depleted conditions in neuronal cells by regulating the intracellular ROS le…	0.0658615
g10804	-0.788201	3.01185	sp|Q19980|GCH1_CAEEL	Involved in serotonin and dopamine biosynthesis that affects movement, mating behavior, foraging behavior, and cell migration.	5.91884e-05
g10806	-0.125996	4.43197	sp|Q8C811|S35E2_MOUSE	Putative transporter.	0.404683
g10810	0.452508	11.3976	sp|Q8N8R7|AL14E_HUMAN	Through its interaction with ARL14 and MYO1E, may connect MHC class II-containing cytoplasmic vesicles to the actin network and hence controls the movement of these vesicles along the actin cytoskeleton in dendritic cells.	5.34632e-05
g10811	-0.402873	2.27776			0.528552
g10813	0.250074	5.75034	sp|P08579|RU2B_HUMAN	Involved in pre-mRNA splicing as component of the spliceosome (PubMed:11991638, PubMed:28502770, PubMed:28781166, PubMed:28076346). Associated with sn-RNP U2, where it contributes to the binding of stem loop IV of U2 snRNA (PubMed:9716128).	0.0174962
g10815	-0.452793	0.992466			0.199666
g10817	-1.45927	4.2449	sp|Q26627|SUREJ_STRPU	Receptor for the egg jelly ligands inducing the acrosome reaction. Could be a regulator of sperm ion channels.	4.61768e-09
g10818	-1.06469	2.78624	sp|Q7TN88|PK1L2_MOUSE	May function as an ion-channel regulator. May function as a G-protein-coupled receptor (By similarity).	1.17102e-05
g10819	-1.00301	2.95771	sp|H2LRU7|PKD2_ORYLA	Component of a heteromeric calcium-permeable ion channel formed by PKD1 and PKD2 that is activated by interaction between PKD1 and a Wnt family member, such as WNT3A and WNT9B. Can also form a functional, homotetrameric ion channel (By similarity). Functions as non-selective, voltage-gated cation channel. Required for normal oscillation of Ca(2+) levels within cilia; these oscillations of the int…	1.22621e-05
g10820	-0.07461	0.854179			0.862188
g10821	-0.868675	3.77357			6.5106e-05
g10822	-1.0429	2.44448			2.91335e-05
g10823	-1.01944	2.78201	sp|Q7TN88|PK1L2_MOUSE	May function as an ion-channel regulator. May function as a G-protein-coupled receptor (By similarity).	5.68203e-06
g10827	-0.795009	3.10813	sp|Q7Z442|PK1L2_HUMAN	May function as an ion-channel regulator. May function as a G-protein-coupled receptor.	0.000175709
g1083	-0.194514	1.80996	sp|A6H8T2|CASC1_DANRE		0.597871
g1084	0.558511	6.36349	sp|P28021|CSK2B_XENLA	Participates in Wnt signaling. Plays a complex role in regulating the basal catalytic activity of the alpha subunit (By similarity).	8.40316e-06
g10840	-5.49027	0.454398			1.0258e-06
g10843	0.475674	4.43725			0.00130114
g10844	0.407605	1.5171			0.18483
g10847	-0.147024	2.51597	sp|G3V9H8|RET_RAT	Receptor tyrosine-protein kinase involved in numerous cellular mechanisms including cell proliferation, neuronal navigation, cell migration, and cell differentiation upon binding with glial cell derived neurotrophic factor family ligands. Phosphorylates PTK2/FAK1. Regulates both cell death/survival balance and positional information. Required for the molecular mechanisms orchestration during inte…	0.472667
g10848	-0.891736	1.76004			0.00370894
g10850	0.158293	3.0796			0.532053
g10852	-0.633489	4.2163	sp|Q9NRR4|RNC_HUMAN	Ribonuclease III double-stranded (ds) RNA-specific endoribonuclease that is involved in the initial step of microRNA (miRNA) biogenesis. Component of the microprocessor complex that is required to process primary miRNA transcripts (pri-miRNAs) to release precursor miRNA (pre-miRNA) in the nucleus. Within the microprocessor complex, DROSHA cleaves the 3' and 5' strands of a stem-loop in pri-miRNAs…	0.000713643
g10853	-1.10474	2.24921	sp|Q5HZJ0|RNC_MOUSE	Ribonuclease III double-stranded (ds) RNA-specific endoribonuclease that is involved in the initial step of microRNA (miRNA) biogenesis. Component of the microprocessor complex that is required to process primary miRNA transcripts (pri-miRNAs) to release precursor miRNA (pre-miRNA) in the nucleus. Within the microprocessor complex, DROSHA cleaves the 3' and 5' strands of a stem-loop in pri-miRNAs…	0.000531783
g10854	0.602818	4.19386	sp|Q4QQY7|TGT_XENLA	Catalytic subunit of the queuine tRNA-ribosyltransferase (TGT) that catalyzes the base-exchange of a guanine (G) residue with queuine (Q) at position 34 (anticodon wobble position) in tRNAs with GU(N) anticodons (tRNA-Asp, -Asn, -His and -Tyr), resulting in the hypermodified nucleoside queuosine (7-(((4,5-cis-dihydroxy-2-cyclopenten-1-yl)amino)methyl)-7-deazaguanosine). Catalysis occurs through a…	9.02968e-05
g1086	-1.1698	3.14241	sp|Q640L5|CCD18_MOUSE		2.51668e-05
g10862	0.676235	2.47905			0.29855
g10863	0.943458	1.5425			0.00228762
g10867	-1.97665	1.51057	sp|A0A0R4I9Y1|R213B_DANRE	Has both E3 ubiquitin-protein ligase and ATPase activities.	1.19366e-06
g10869	-0.447082	0.711888	sp|Q7Z442|PK1L2_HUMAN	May function as an ion-channel regulator. May function as a G-protein-coupled receptor.	0.234786
g10876	-0.207013	2.02706	sp|Q0EEE2|PTHD3_MOUSE	May play a role in sperm development or sperm function.	0.496283
g10877	0.370854	4.98311	sp|P41565|IDHG1_RAT	Regulatory subunit which plays a role in the allosteric regulation of the enzyme catalyzing the decarboxylation of isocitrate (ICT) into alpha-ketoglutarate. The heterodimer composed of the alpha (IDH3A) and beta (IDH3B) subunits and the heterodimer composed of the alpha (IDH3A) and gamma (IDH3G) subunits, have considerable basal activity but the full activity of the heterotetramer (containing tw…	0.00283651
g10878	-1.31081	1.96045	sp|Q4UMH6|Y381_RICFE		0.000203807
g10882	-0.871652	1.65828			0.00501047
g10886	0.156035	3.32012	sp|A8MTA8|F166B_HUMAN		0.403402
g10887	-1.13113	3.30579	sp|Q9Z336|DYLT1_RAT	Acts as one of several non-catalytic accessory components of the cytoplasmic dynein 1 complex that are thought to be involved in linking dynein to cargos and to adapter proteins that regulate dynein function. Cytoplasmic dynein 1 acts as a motor for the intracellular retrograde motility of vesicles and organelles along microtubules. Binds to transport cargos and is involved in apical cargo transp…	0.000337882
g1089	-0.0332492	1.33445	sp|Q60547|SYCP3_MESAU	Component of the synaptonemal complexes (SCS), formed between homologous chromosomes during meiotic prophase (PubMed:7876343). Required for centromere pairing during meiosis in male germ cells. Required for normal meiosis during spermatogenesis and male fertility. Plays a lesser role in female fertility. Required for efficient phosphorylation of HORMAD1 and HORMAD2.	0.918127
g10897	-0.608584	3.21453	sp|Q61555|FBN2_MOUSE	Fibrillin-2: Fibrillins are structural components of 10-12 nm extracellular calcium-binding microfibrils, which occur either in association with elastin or in elastin-free bundles. Fibrillin-2-containing microfibrils regulate the early process of elastic fiber assembly. Regulates osteoblast maturation by controlling TGF-beta bioavailability and calibrating TGF-beta and BMP levels, respectively (P…	0.0142009
g109	0.0206652	0.872893			0.962902
g1090	0.19416	4.6964	sp|Q9BY11|PACN1_HUMAN	Plays a role in the reorganization of the microtubule cytoskeleton via its interaction with MAPT; this decreases microtubule stability and inhibits MAPT-induced microtubule polymerization. Plays a role in cellular transport processes by recruiting DNM1, DNM2 and DNM3 to membranes. Plays a role in the reorganization of the actin cytoskeleton and in neuron morphogenesis via its interaction with COB…	0.0442882
g10912	0.209061	4.36578	sp|A7SLW1|BCAT_NEMVE	Catalyzes the first reaction in the catabolism of the essential branched chain amino acids leucine, isoleucine, and valine.	0.151631
g10915	0.568476	5.08787	sp|P24288|BCAT1_MOUSE	Catalyzes the first reaction in the catabolism of the essential branched chain amino acids leucine, isoleucine, and valine.	3.05394e-06
g10925	-1.11423	4.2348			3.75415e-07
g10926	-3.91005	1.2426			6.19784e-08
g1093	0.397738	5.66701	sp|Q9XSJ0|UCHL5_BOVIN	Protease that specifically cleaves 'Lys-48'-linked polyubiquitin chains. Deubiquitinating enzyme associated with the 19S regulatory subunit of the 26S proteasome. Putative regulatory component of the INO80 complex; however is inactive in the INO80 complex and is activated by a transient interaction of the INO80 complex with the proteasome via ADRM1 (By similarity).	5.21005e-05
g10931	-1.45195	2.34789	sp|P29027|CHI2_RHIOL	Probably involved in the apical growth and branching of fungal hyphae.	7.66685e-06
g10932	-1.65234	3.38911	sp|P29061|CHIB_TOBAC	This protein functions as a defense against chitin containing fungal pathogens.	2.91798e-07
g10933	0.714084	5.61366	sp|Q9Y2H1|ST38L_HUMAN	Involved in the regulation of structural processes in differentiating and mature neuronal cells.	9.47291e-08
g10935	-0.302485	2.71568	sp|Q9W0Y8|SCN60_DROME	Mediates the voltage-dependent sodium ion permeability of excitable membranes. Plays a role in processing of olfactory information during the olfactory avoidance response.	0.12292
g10938	-0.423172	1.21847	sp|Q9R053|SCNBA_MOUSE	This protein mediates the voltage-dependent sodium ion permeability of excitable membranes. Assuming opened or closed conformations in response to the voltage difference across the membrane, the protein forms a sodium-selective channel through which sodium ions may pass in accordance with their electrochemical gradient. It is a tetrodotoxin-resistant sodium channel isoform. Also involved, with th…	0.218438
g10943	-0.540014	1.03265	sp|Q05973|SCN1_HETBL	Mediates the voltage-dependent sodium ion permeability of excitable membranes. Assuming opened or closed conformations in response to the voltage difference across the membrane, the protein forms a sodium-selective channel through which Na(+) ions may pass in accordance with their electrochemical gradient.	0.17402
g10944	-0.0427804	3.15996	sp|Q9PSX7|RHOC_CHICK	Regulates a signal transduction pathway linking plasma membrane receptors to the assembly of focal adhesions and actin stress fibers. Serves as a microtubule-dependent signal that is required for the myosin contractile ring formation during cell cycle cytokinesis. Regulates apical junction formation in bronchial epithelial cells (By similarity).	0.854318
g10945	-0.336959	0.964033	sp|Q9NBX4|RTXE_DROME		0.328641
g1095	-0.541461	3.01899	sp|Q9WUP7|UCHL5_MOUSE	Protease that specifically cleaves 'Lys-48'-linked polyubiquitin chains. Deubiquitinating enzyme associated with the 19S regulatory subunit of the 26S proteasome. Putative regulatory component of the INO80 complex; however is inactive in the INO80 complex and is activated by a transient interaction of the INO80 complex with the proteasome via ADRM1 (By similarity).	0.0153984
g10950	0.548048	3.78494			0.00489928
g10953	0.750581	4.70044	sp|Q66KV4|BAFB_XENLA	Plays fundamental roles in nuclear assembly, chromatin organization, gene expression and gonad development. May potently compress chromatin structure and be involved in membrane recruitment and chromatin decondensation during nuclear assembly. Contains 2 non-specific dsDNA-binding sites which may promote DNA cross-bridging (By similarity).	0.000452838
g10954	0.282226	4.01169	sp|Q9CQ71|RFA3_MOUSE	As part of the heterotrimeric replication protein A complex (RPA/RP-A), binds and stabilizes single-stranded DNA intermediates, that form during DNA replication or upon DNA stress. It prevents their reannealing and in parallel, recruits and activates different proteins and complexes involved in DNA metabolism. Thereby, it plays an essential role both in DNA replication and the cellular response t…	0.113051
g10955	0.861504	5.66009	sp|B3EWZ3|CADN_ACRMI		3.04201e-07
g1096	0.849801	11.2581	sp|Q63429|UBC_RAT	Ubiquitin: Exists either covalently attached to another protein, or free (unanchored). When covalently bound, it is conjugated to target proteins via an isopeptide bond either as a monomer (monoubiquitin), a polymer linked via different Lys residues of the ubiquitin (polyubiquitin chains) or a linear polymer linked via the initiator Met of the ubiquitin (linear polyubiquitin chains). Polyubiquiti…	3.61729e-09
g10961	3.92278	2.5601	sp|Q9CYL5|GAPR1_MOUSE		1.05806e-10
g10962	-2.18058	0.50368			6.62835e-05
g10965	-0.43201	4.52458	sp|Q5HZM1|EIF1A_XENLA	May play a role into cellular response to oxidative stress. May decrease cell proliferation (By similarity).	0.000707526
g10967	1.5243	7.28618			1.49792e-12
g1097	6.09779	-0.359927			8.94094e-06
g10974	-0.504372	3.844	sp|Q7M6Z4|KIF27_MOUSE	Plays an essential role in motile ciliogenesis.	0.00176898
g10976	0.0567904	4.49512	sp|Q5XJX0|JGN1A_DANRE	Endoplasmic reticulum transmembrane protein involved in vesicle-mediated transport, which is required for neutrophil function.	0.68016
g10980	0.349026	2.53898	sp|Q9H8X2|IPPK_HUMAN	Phosphorylates Ins(1,3,4,5,6)P5 at position 2 to form Ins(1,2,3,4,5,6)P6 (InsP6 or phytate). InsP6 is involved in many processes such as mRNA export, non-homologous end-joining, endocytosis, ion channel regulation. It also protects cells from TNF-alpha-induced apoptosis.	0.216762
g10982	-0.276301	5.57077	sp|Q05086|UBE3A_HUMAN	E3 ubiquitin-protein ligase which accepts ubiquitin from an E2 ubiquitin-conjugating enzyme in the form of a thioester and transfers it to its substrates (PubMed:10373495, PubMed:16772533, PubMed:19204938, PubMed:19233847, PubMed:19325566, PubMed:19591933, PubMed:22645313, PubMed:24273172, PubMed:24728990). Several substrates have been identified including the ARNTL/BMAL1, ARC, RAD23A and RAD23B,…	0.0617408
g10986	0.680283	11.3266			6.71172e-08
g10987	0.486697	2.70368	sp|P35546|RET_MOUSE	Receptor tyrosine-protein kinase involved in numerous cellular mechanisms including cell proliferation, neuronal navigation, cell migration, and cell differentiation upon binding with glial cell derived neurotrophic factor family ligands. Phosphorylates PTK2/FAK1. Regulates both cell death/survival balance and positional information. Required for the molecular mechanisms orchestration during inte…	0.0139332
g1099	-0.212257	3.58603	sp|Q9JHX4|CASP8_RAT	Most upstream protease of the activation cascade of caspases responsible for the TNFRSF6/FAS mediated and TNFRSF1A induced cell death. Binding to the adapter molecule FADD recruits it to either receptor. The resulting aggregate called death-inducing signaling complex (DISC) performs CASP8 proteolytic activation. The active dimeric enzyme is then liberated from the DISC and free to activate downst…	0.440163
g10995	-0.751327	3.07227	sp|D2IYS2|TORSO_BOMMO	Probable receptor tyrosine kinase. During postembryonic development, involved in the initiation of metamorphosis probably by inducing the production of ecdysone in response to prothoracicotropic hormone (PTTH) (By similarity). Binding to PTTH stimulates activation of canonical MAPK signaling leading to ERK phosphorylation (PubMed:19965758, PubMed:26928300).	0.000367984
g10998	-1.42743	0.47707			0.00524045
g1100	-0.2704	2.37046	sp|O89110|CASP8_MOUSE	Most upstream protease of the activation cascade of caspases responsible for the TNFRSF6/FAS mediated and TNFRSF1A induced cell death. Binding to the adapter molecule FADD recruits it to either receptor. The resulting aggregate called death-inducing signaling complex (DISC) performs CASP8 proteolytic activation. The active dimeric enzyme is then liberated from the DISC and free to activate downst…	0.350444
g11003	0.425377	3.54663	sp|P25472|GUND_CLOCE	The biological conversion of cellulose to glucose generally requires three types of hydrolytic enzymes: (1) Endoglucanases which cut internal beta-1,4-glucosidic bonds; (2) Exocellobiohydrolases that cut the disaccharide cellobiose from the non-reducing end of the cellulose polymer chain; (3) Beta-1,4-glucosidases which hydrolyze the cellobiose and other short cello-oligosaccharides to glucose.	0.0109405
g11005	-0.469894	3.50168	sp|Q6NT16|S18B1_HUMAN		0.0197039
g11008	0.64955	6.70323	sp|Q3ULD5|MCCB_MOUSE	Carboxyltransferase subunit of the 3-methylcrotonyl-CoA carboxylase, an enzyme that catalyzes the conversion of 3-methylcrotonyl-CoA to 3-methylglutaconyl-CoA, a critical step for leucine and isovaleric acid catabolism.	1.14335e-07
g1101	-0.475734	0.456312	sp|P21329|RTJK_DROFU		0.367984
g11016	-0.0248635	2.39162			0.926327
g11017	-0.409445	2.86417	sp|P47736|RPGP1_HUMAN	GTPase activator for the nuclear Ras-related regulatory protein RAP-1A (KREV-1), converting it to the putatively inactive GDP-bound state.	0.0216581
g11018	0.0898484	6.17199	sp|Q9Y6N7|ROBO1_HUMAN	Receptor for SLIT1 and SLIT2 that mediates cellular responses to molecular guidance cues in cellular migration, including axonal navigation at the ventral midline of the neural tube and projection of axons to different regions during neuronal development (PubMed:10102268, PubMed:24560577). Interaction with the intracellular domain of FLRT3 mediates axon attraction towards cells expressing NTN1 (P…	0.478159
g11019	-0.0695308	2.96802	sp|Q9MZD1|S17A5_SHEEP	Primary solute translocator for anionic substances; particularly it is a free sialic acid transporter in the lysosomes (Probable). Receptor for CM101, a polysaccharide produced by group B Streptococcus with antipathoangiogenic properties.	0.724098
g11020	0.569746	9.56908	sp|Q99PD4|ARC1A_RAT	Probably functions as component of the Arp2/3 complex which is involved in regulation of actin polymerization and together with an activating nucleation-promoting factor (NPF) mediates the formation of branched actin networks (By similarity). In addition to its role in the cytoplasmic cytoskeleton, the Arp2/3 complex also promotes actin polymerization in the nucleus, thereby regulating gene trans…	5.52586e-05
g11021	1.06689	3.88428	sp|O76075|DFFB_HUMAN	Nuclease that induces DNA fragmentation and chromatin condensation during apoptosis. Degrades naked DNA and induces apoptotic morphology.	3.95277e-08
g11022	0.16734	4.81751	sp|Q9H6U8|ALG9_HUMAN	Catalyzes the transfer of mannose from Dol-P-Man to lipid-linked oligosaccharides.	0.173892
g11023	-0.430836	4.17646	sp|B2GUZ1|UBP4_RAT	Deubiquitinating enzyme that removes conjugated ubiquitin from target proteins. Deubiquitinates PDPK1. Deubiquitinates TRIM21. Deubiquitinates receptor ADORA2A which increases the amount of functional receptor at the cell surface. May regulate mRNA splicing through deubiquitination of the U4 spliceosomal protein PRPF3. This may prevent its recognition by the U5 component PRPF8 thereby destabilizi…	0.00253829
g11024	0.541444	4.2122			5.47397e-05
g11025	0.041439	3.99583			0.787294
g11028	-0.676953	0.626132			0.092243
g11029	-0.122467	3.27728			0.514224
g11030	-0.349547	5.68562			0.00348459
g11039	-2.66707	2.16554			2.32127e-08
g11040	0.371011	4.90015	sp|Q5R8I6|TBC23_PONAB	Putative Rab GTPase-activating protein which plays a role in vesicular trafficking. Involved in endosome-to-Golgi trafficking. Acts as a bridging protein by binding simultaneously to golgins, including GOLGA1 and GOLGA4, located at the trans-Golgi, and to the WASH complex, located on endosome-derived vesicles. Together with WDR11 complex facilitates the golgin-mediated capture of vesicles generat…	0.00109053
g11041	-0.405693	4.57169	sp|Q6PBU5|GRT1A_DANRE	May act as a GTPase-activating protein for Rab family protein(s).	0.00614024
g11042	0.249983	3.8001	sp|P50591|TNF10_HUMAN	Cytokine that binds to TNFRSF10A/TRAILR1, TNFRSF10B/TRAILR2, TNFRSF10C/TRAILR3, TNFRSF10D/TRAILR4 and possibly also to TNFRSF11B/OPG (PubMed:26457518, PubMed:10549288). Induces apoptosis. Its activity may be modulated by binding to the decoy receptors TNFRSF10C/TRAILR3, TNFRSF10D/TRAILR4 and TNFRSF11B/OPG that cannot induce apoptosis.	0.0798027
g11045	-0.30322	2.31491	sp|Q80TQ2|CYLD_MOUSE	Deubiquitinase that specifically cleaves 'Lys-63'- and linear 'Met-1'-linked polyubiquitin chains and is involved in NF-kappa-B activation and TNF-alpha-induced necroptosis (PubMed:17548520, PubMed:28701375, PubMed:29291351). Plays an important role in the regulation of pathways leading to NF-kappa-B activation (PubMed:16713561). Contributes to the regulation of cell survival, proliferation and d…	0.145061
g11048	1.02163	1.55393	sp|Q64077|NK2R_CAVPO	This is a receptor for the tachykinin neuropeptide substance K (neurokinin A). It is associated with G proteins that activate a phosphatidylinositol-calcium second messenger system.	0.0372217
g11056	0.658319	7.72702			1.7629e-06
g11058	0.422646	8.16437	sp|C4R7Z3|C9MT_KOMPG	Catalyzes methylation of the sphingoid base component of glucosylceramides (GluCers) at the C9-position. Sphingolipid C9-methylation requires 4,8-desaturated ceramides as substrates. Glucosylceramides play important roles in growth, differentiation and pathogenicity. The methyl group at the C9-position distinguishes fungal glucosylceramides from those of plants and animals, and may thus play a ro…	0.000223013
g11059	-0.0875777	5.55984	sp|Q9BQI7|PSD2_HUMAN		0.441762
g1106	-0.223817	4.61141	sp|P55210|CASP7_HUMAN	Involved in the activation cascade of caspases responsible for apoptosis execution. Cleaves and activates sterol regulatory element binding proteins (SREBPs). Proteolytically cleaves poly(ADP-ribose) polymerase (PARP) at a '216-Asp-|-Gly-217' bond. Overexpression promotes programmed cell death.	0.0242887
g11061	-1.49153	7.35871			2.01599e-05
g11062	0.776781	3.72578	sp|Q9H4G4|GAPR1_HUMAN		0.000115066
g11063	-0.145547	4.2413	sp|Q2PFD7|PSD3_MOUSE	Guanine nucleotide exchange factor for ARF6.	0.265975
g11064	0.147081	4.15567	sp|Q9BXC9|BBS2_HUMAN	The BBSome complex is thought to function as a coat complex required for sorting of specific membrane proteins to the primary cilia. The BBSome complex is required for ciliogenesis but is dispensable for centriolar satellite function. This ciliogenic function is mediated in part by the Rab8 GDP/GTP exchange factor, which localizes to the basal body and contacts the BBSome. Rab8(GTP) enters the pr…	0.33304
g11068	-0.317112	2.01582	sp|Q9BXC9|BBS2_HUMAN	The BBSome complex is thought to function as a coat complex required for sorting of specific membrane proteins to the primary cilia. The BBSome complex is required for ciliogenesis but is dispensable for centriolar satellite function. This ciliogenic function is mediated in part by the Rab8 GDP/GTP exchange factor, which localizes to the basal body and contacts the BBSome. Rab8(GTP) enters the pr…	0.237072
g11069	0.416085	3.03261	sp|Q9VAI0|GNA1_DROME		0.0391479
g11070	0.765425	3.68435	sp|Q5TCZ1|SPD2A_HUMAN	Adapter protein involved in invadopodia and podosome formation, extracellular matrix degradation and invasiveness of some cancer cells. Binds matrix metalloproteinases (ADAMs), NADPH oxidases (NOXs) and phosphoinositides. Acts as an organizer protein that allows NOX1- or NOX3-dependent reactive oxygen species (ROS) generation and ROS localization. In association with ADAM12, mediates the neurotox…	9.39067e-06
g11071	0.330936	2.8267			0.10282
g11091	-0.0529387	4.61004	sp|Q92519|TRIB2_HUMAN	Interacts with MAPK kinases and regulates activation of MAP kinases. Does not display kinase activity (By similarity).	0.763099
g11092	0.162799	6.3939	sp|O97902|ASAP1_BOVIN	Possesses phosphatidylinositol 4,5-bisphosphate-dependent GTPase-activating protein activity for ARF1 (ADP ribosylation factor 1) and ARF5 and a lesser activity towards ARF6. May coordinate membrane trafficking with cell growth or actin cytoskeleton remodeling by binding to both SRC and PIP2. Plays a role in ciliogenesis (By similarity). May function as a signal transduction protein involved in t…	0.171742
g11093	-0.372369	4.0255	sp|Q9QWY8|ASAP1_MOUSE	May function as a signal transduction protein involved in the differentiation of fibroblasts into adipocytes and possibly other cell types. Plays a role in ciliogenesis (By similarity). Posseses phosphatidylinositol 4,5-bisphosphate-dependent GTPase-activating protein activity for ARF1 (ADP ribosylation factor 1) and ARF5 and a lesser activity towards ARF6. May coordinate membrane trafficking wit…	0.0113837
g11094	0.0176704	3.34523	sp|Q9MYS6|KCNQ1_RABIT	Potassium channel that plays an important role in a number of tissues, including heart, inner ear, stomach and colon (By similarity). Associates with KCNE beta subunits that modulates current kinetics (By similarity). Induces a voltage-dependent by rapidly activating and slowly deactivating potassium-selective outward current (By similarity). Promotes also a delayed voltage activated potassium cu…	0.92877
g11095	-0.160242	7.99351	sp|P97494|GSH1_MOUSE		0.141004
g111	0.429695	1.48995			0.110584
g11102	-0.676104	1.60021			0.0177557
g11103	0.337481	0.684899			0.370149
g11105	0.488591	1.93588	sp|D4A7U2|CARTF_RAT	Acts as a transcriptional activator that mediates the calcium- and neuron-selective induction of BDNF exon III transcription. Binds to the consensus calcium-response element CaRE1 5'-CTATTTCGAG-3' sequence.	0.122791
g11106	-0.236819	4.63628			0.192779
g11111	-0.675975	2.04035	sp|Q3EAQ5|PTR36_ARATH		0.00527599
g11117	0.0823058	5.34885	sp|O05218|YWRD_BACSU	Overexpressed protein with an N-terminal His tag has been reported not to hydrolyze glutathione; it is not clear if the construct is processed to 2 subunits (PubMed:14762019).	0.518622
g11119	-0.992314	6.40503			9.31089e-08
g11120	-0.151362	3.74132			0.584963
g11122	-0.186443	5.75746	sp|P00534|ERBB_ALV		0.134273
g11131	-1.42339	2.47084	sp|Q03380|COMI_DICDI	May have a role in cell motility. It has high affinity for both G-actin and F-actin. Binds to vesicle membranes via mannose residues and, by way of its interaction with actin, links these membranes to the cytoskeleton.	0.000643052
g11132	-0.881865	0.518405	sp|Q03380|COMI_DICDI	May have a role in cell motility. It has high affinity for both G-actin and F-actin. Binds to vesicle membranes via mannose residues and, by way of its interaction with actin, links these membranes to the cytoskeleton.	0.10054
g11134	1.85297	10.2406			4.52926e-14
g11135	-0.867633	7.65576			0.0883145
g11136	-0.213646	3.13942	sp|Q7Z769|S35E3_HUMAN	Putative transporter.	0.254222
g11137	0.839049	2.64005	sp|Q17RP2|TIGD6_HUMAN		0.000646741
g11138	-0.528093	2.14526	sp|Q24352|GBRAL_DROME	GABA, an inhibitory neurotransmitter, mediates neuronal inhibition by binding to the GABA receptor and opening an integral chloride channel. May combine with the ligand-gated ion channel subunit Lcch3 to form cation-selective GABA-gated ion channels.	0.0524599
g11145	0.137249	4.12628	sp|Q94900|GLUCL_DROME	Glutamate-gated chloride channel subunit. Glutamate binding triggers a rapidly reversible current, while the anti-helmintic drug ivermectin triggers a permanently open channel configuration.	0.451435
g11147	1.89556	2.13276	sp|P69141|H2A_STRPU	Core component of nucleosome. Nucleosomes wrap and compact DNA into chromatin, limiting DNA accessibility to the cellular machineries which require DNA as a template. Histones thereby play a central role in transcription regulation, DNA repair, DNA replication and chromosomal stability. DNA accessibility is regulated via a complex set of post-translational modifications of histones, also called h…	1.24108e-08
g11148	-0.0356401	3.52942	sp|Q9P2K2|TXD16_HUMAN		0.837415
g1115	-0.276548	3.29138	sp|P35546|RET_MOUSE	Receptor tyrosine-protein kinase involved in numerous cellular mechanisms including cell proliferation, neuronal navigation, cell migration, and cell differentiation upon binding with glial cell derived neurotrophic factor family ligands. Phosphorylates PTK2/FAK1. Regulates both cell death/survival balance and positional information. Required for the molecular mechanisms orchestration during inte…	0.0820363
g11150	0.257506	7.02147	sp|Q8CJG0|AGO2_MOUSE	Required for RNA-mediated gene silencing (RNAi) by the RNA-induced silencing complex (RISC). The 'minimal RISC' appears to include AGO2 bound to a short guide RNA such as a microRNA (miRNA) or short interfering RNA (siRNA). These guide RNAs direct RISC to complementary mRNAs that are targets for RISC-mediated gene silencing. The precise mechanism of gene silencing depends on the degree of complem…	0.0136187
g11153	-1.38935	2.4504	sp|O77503|AGO2_RABIT	Required for RNA-mediated gene silencing (RNAi) by the RNA-induced silencing complex (RISC). The 'minimal RISC' appears to include AGO2 bound to a short guide RNA such as a microRNA (miRNA) or short interfering RNA (siRNA). These guide RNAs direct RISC to complementary mRNAs that are targets for RISC-mediated gene silencing. The precise mechanism of gene silencing depends on the degree of complem…	0.00026415
g11156	0.368998	7.86609	sp|Q32P51|RA1L2_HUMAN	Involved in the packaging of pre-mRNA into hnRNP particles, transport of poly(A) mRNA from the nucleus to the cytoplasm and may modulate splice site selection.	0.000427767
g11157	0.219414	4.5344	sp|Q5XJS5|THOC6_DANRE	Acts as component of the THO subcomplex of the TREX complex which is thought to couple mRNA transcription, processing and nuclear export, and which specifically associates with spliced mRNA and not with unspliced pre-mRNA. TREX is recruited to spliced mRNAs by a transcription-independent mechanism, binds to mRNA upstream of the exon-junction complex (EJC) and is recruited in a splicing- and cap-d…	0.0541054
g1116	-0.0655686	1.97055	sp|P33497|RYK_AVIR3		0.799424
g11167	0.393305	1.18935			0.240518
g11168	0.585839	4.08994	sp|A4IF69|NHLC2_BOVIN	Required for normal embryonic development.	0.000126481
g11169	0.287936	4.1239	sp|Q5ZI67|NHLC2_CHICK	Required for normal embryonic development.	0.0331001
g1117	-1.11564	1.29326			0.00063719
g11170	0.041093	4.96651	sp|Q66T02|PKHG5_MOUSE	Guanine nucleotide exchange factor that activates RHOA and maybe the NF-kappa-B signaling pathway. Involved in the control of neuronal cell differentiation. Plays a role in angiogenesis through regulation of endothelial cells chemotaxis.	0.816736
g11175	-1.97166	2.16582			4.59646e-08
g1118	-1.11448	1.05909	sp|Q8NDA2|HMCN2_HUMAN		0.00165449
g11184	0.01931	4.9136	sp|Q9UBH6|XPR1_HUMAN	Plays a role in phosphate homeostasis. Mediates phosphate export from the cell (PubMed:23791524, PubMed:25938945). Binds inositol hexakisphosphate (Ins6P) and similar inositol polyphosphates, such as 5-diphospho-inositol pentakisphosphate (5-InsP7); these are important intracellular signaling molecules (PubMed:27080106).	0.871098
g11187	-2.16419	5.23906			2.37585e-13
g1119	-0.923069	1.80189			0.00129383
g11192	0.339038	5.06953	sp|A7SBN6|ZGPAT_NEMVE	Transcription repressor.	0.0058868
g11194	0.157601	2.00341	sp|Q5IS35|TPC_MACFA	Mitochondrial transporter mediating uptake of thiamine pyrophosphate (ThPP) into mitochondria.	0.468126
g11195	0.130815	4.7529	sp|Q5ZM96|QTRT2_CHICK	Non-catalytic subunit of the queuine tRNA-ribosyltransferase (TGT) that catalyzes the base-exchange of a guanine (G) residue with queuine (Q) at position 34 (anticodon wobble position) in tRNAs with GU(N) anticodons (tRNA-Asp, -Asn, -His and -Tyr), resulting in the hypermodified nucleoside queuosine (7-(((4,5-cis-dihydroxy-2-cyclopenten-1-yl)amino)methyl)-7-deazaguanosine).	0.410826
g11196	0.329385	3.25054	sp|Q8TAC1|RFESD_HUMAN		0.0534488
g11197	-0.928395	3.41093			2.95474e-05
g11199	-0.879404	2.38206	sp|Q9ESV0|DDX24_MOUSE	ATP-dependent RNA helicase.	0.000337413
g112	0.361913	4.67367	sp|Q24488|ROR1_DROME	Tyrosine-protein kinase receptor that functions during early stages of neuronal development.	0.00427527
g1120	0.15149	2.8612	sp|Q3UM18|LSG1_MOUSE	GTPase required for the XPO1/CRM1-mediated nuclear export of the 60S ribosomal subunit. Probably acts by mediating the release of NMD3 from the 60S ribosomal subunit after export into the cytoplasm (By similarity).	0.490419
g11201	0.131065	1.07888			0.703733
g11203	-0.519764	5.38203	sp|Q5RDL2|DDX24_PONAB	ATP-dependent RNA helicase.	0.00126493
g11204	-0.699505	4.56295	sp|Q54TR1|CFAD_DICDI	Inhibitor that slows proliferation of secreting cells (also known as chalone). Requires aprA for activity.	6.15301e-07
g11206	-0.182882	3.7679	sp|Q552M5|GEFY_DICDI	Promotes the exchange of Ras-bound GDP by GTP.	0.208055
g1121	0.189529	5.17552	sp|Q9CYC6|DCP2_MOUSE	Decapping metalloenzyme that catalyzes the cleavage of the cap structure on mRNAs (PubMed:21070968). Removes the 7-methyl guanine cap structure from mRNA molecules, yielding a 5'-phosphorylated mRNA fragment and 7m-GDP (PubMed:21070968). Necessary for the degradation of mRNAs, both in normal mRNA turnover and in nonsense-mediated mRNA decay (By similarity). Plays a role in replication-dependent h…	0.0403675
g11210	0.193773	5.79824	sp|Q14DH7|ACSS3_MOUSE	Catalyzes the synthesis of acetyl-CoA from short-chain fatty acids (By similarity). Propionate is the preferred substrate but can also utilize acetate and butyrate with a much lower affinity (By similarity).	0.121243
g11212	-0.0949041	4.32705	sp|Q8BUV8|GP107_MOUSE	Has been proposed to act as a receptor for neuronostatin, a peptide derived from the somatostatin/SST precursor (By similarity). Involved in blood sugar regulation through the induction of glucagon in response to low glucose (By similarity).	0.628043
g11214	-1.93943	1.2243			3.72338e-06
g11218	0.116746	5.55212	sp|Q5R513|MPPA_PONAB	Substrate recognition and binding subunit of the essential mitochondrial processing protease (MPP), which is required for maturation of the majority of mitochondrial precursor proteins (By similarity). Most MPP cleavage sites follow an arginine at position -2 (By similarity).	0.299534
g11219	-0.288699	5.82345	sp|Q6NWD4|TIM50_DANRE	Essential component of the TIM23 complex, a complex that mediates the translocation of transit peptide-containing proteins across the mitochondrial inner membrane.	0.00415958
g1122	0.00121808	0.893678			0.997606
g11220	0.60924	10.9702	sp|Q91XA9|CHIA_MOUSE	Degrades chitin and chitotriose. May participate in the defense against nematodes, fungi and other pathogens. Plays a role in T-helper cell type 2 (Th2) immune response. Contributes to the response to IL-13 and inflammation in response to IL-13. Stimulates chemokine production by pulmonary epithelial cells. Protects lung epithelial cells against apoptosis and promotes phosphorylation of AKT1. Its…	1.73038e-06
g11221	0.742629	11.289	sp|Q13231|CHIT1_HUMAN	Degrades chitin, chitotriose and chitobiose. May participate in the defense against nematodes and other pathogens. Isoform 3 has no enzymatic activity.	1.03842e-08
g11222	0.38383	4.55887	sp|Q6RY07|CHIA_RAT	Degrades chitin and chitotriose. May participate in the defense against nematodes, fungi and other pathogens. Plays a role in T-helper cell type 2 (Th2) immune response. Contributes to the response to IL-13 and inflammation in response to IL-13. Stimulates chemokine production by pulmonary epithelial cells. Protects lung epithelial cells against apoptosis and promotes phosphorylation of AKT1. Its…	0.0151437
g11224	-0.838248	4.73536			2.39836e-05
g11226	-1.76288	1.53966	sp|U3JAG9|CP131_DANRE	Cilium-specific protein required for the regulation of cilium/flagellum formation (PubMed:19254375). Involved in centriole duplication (By similarity). May play a role in melanosome trafficking (PubMed:24550735).	2.26533e-07
g11228	-0.52822	2.58831	sp|U3JAG9|CP131_DANRE	Cilium-specific protein required for the regulation of cilium/flagellum formation (PubMed:19254375). Involved in centriole duplication (By similarity). May play a role in melanosome trafficking (PubMed:24550735).	0.0794304
g11229	-1.00268	1.43957	sp|U3JAG9|CP131_DANRE	Cilium-specific protein required for the regulation of cilium/flagellum formation (PubMed:19254375). Involved in centriole duplication (By similarity). May play a role in melanosome trafficking (PubMed:24550735).	0.010875
g11230	-0.470106	3.29291	sp|P21328|RTJK_DROME		0.068686
g11231	-0.392227	3.42758	sp|U3JAG9|CP131_DANRE	Cilium-specific protein required for the regulation of cilium/flagellum formation (PubMed:19254375). Involved in centriole duplication (By similarity). May play a role in melanosome trafficking (PubMed:24550735).	0.107928
g11232	0.293467	3.54813			0.10421
g11234	0.0394425	6.9009	sp|Q8K0V4|CNOT3_MOUSE	Component of the CCR4-NOT complex which is one of the major cellular mRNA deadenylases and is linked to various cellular processes including bulk mRNA degradation, miRNA-mediated repression, translational repression during translational initiation and general transcription regulation. Additional complex functions may be a consequence of its influence on mRNA expression. May be involved in metabol…	0.651464
g11236	-0.135222	4.52823	sp|Q8K596|NAC2_MOUSE	Mediates the electrogenic exchange of Ca(2+) against Na(+) ions across the cell membrane, and thereby contributes to the regulation of cytoplasmic Ca(2+) levels and Ca(2+)-dependent cellular processes. Contributes to cellular Ca(2+) homeostasis in excitable cells. Contributes to the rapid decrease of cytoplasmic Ca(2+) levels back to baseline after neuronal activation, and thereby contributes to …	0.28227
g1125	0.375006	7.18057	sp|Q00G26|PLIN5_HUMAN	Lipid droplet-associated protein that maintains the balance between lipogenesis and lipolysis and also regulates fatty acid oxidation in oxidative tissues. Recruits mitochondria to the surface of lipid droplets and is involved in lipid droplet homeostasis by regulating both the storage of fatty acids in the form of triglycerides and the release of fatty acids for mitochondrial fatty acid oxidatio…	0.00873692
g11258	0.0394848	2.97813	sp|Q68EX9|CHID1_XENLA		0.868915
g11259	-0.0693579	2.825	sp|Q7Z4G4|TRM11_HUMAN	Catalytic subunit of an S-adenosyl-L-methionine-dependent tRNA methyltransferase complex that mediates the methylation of the guanosine nucleotide at position 10 (m2G10) in tRNAs.	0.759585
g11260	-0.0113985	2.28081	sp|Q6YJI5|TRM11_CHICK	Catalytic subunit of an S-adenosyl-L-methionine-dependent tRNA methyltransferase complex that mediates the methylation of the guanosine nucleotide at position 10 (m2G10) in tRNAs.	0.967251
g11261	-1.49275	7.621			2.19595e-05
g11266	-0.0109223	5.66528	sp|Q9NTI2|AT8A2_HUMAN	Catalytic component of a P4-ATPase flippase complex which catalyzes the hydrolysis of ATP coupled to the transport of aminophospholipids from the outer to the inner leaflet of various membranes and ensures the maintenance of asymmetric distribution of phospholipids. Phospholipid translocation seems also to be implicated in vesicle formation and in uptake of lipid signaling molecules. Reconstitute…	0.927795
g11267	-0.671327	3.01284	sp|Q9NTI2|AT8A2_HUMAN	Catalytic component of a P4-ATPase flippase complex which catalyzes the hydrolysis of ATP coupled to the transport of aminophospholipids from the outer to the inner leaflet of various membranes and ensures the maintenance of asymmetric distribution of phospholipids. Phospholipid translocation seems also to be implicated in vesicle formation and in uptake of lipid signaling molecules. Reconstitute…	0.00142074
g11268	-1.04114	2.58446	sp|Q9NTI2|AT8A2_HUMAN	Catalytic component of a P4-ATPase flippase complex which catalyzes the hydrolysis of ATP coupled to the transport of aminophospholipids from the outer to the inner leaflet of various membranes and ensures the maintenance of asymmetric distribution of phospholipids. Phospholipid translocation seems also to be implicated in vesicle formation and in uptake of lipid signaling molecules. Reconstitute…	1.89296e-05
g11269	0.577293	2.24583	sp|Q6NYV5|SP30L_DANRE	Functions as transcription repressor, probably via its interaction with histone deacetylase complexes (PubMed:22821512). Required for normal expression of numerous target genes (PubMed:22821512). Involved in the functional recruitment of the class 1 Sin3-histone deacetylase complex (HDAC) to the nucleolus. Binds DNA, apparently without sequence-specificity, and bends bound double-stranded DNA. Bi…	0.00305368
g1127	0.335169	2.60157	sp|Q9NXR5|ANR10_HUMAN		0.112232
g11270	-0.115392	6.82916	sp|P58797|NXF1_COTJA	Involved in the nuclear export of mRNA from the nucleus to the cytoplasm.	0.309372
g11271	-0.624884	2.79114	sp|Q502W6|VWA3B_HUMAN		0.0162296
g11272	-1.16909	0.985124			0.0042715
g11273	-0.539724	1.43704	sp|Q8CG64|FKRP_MOUSE	Catalyzes the transfer of CDP-ribitol to ribitol 5-phosphate previously attached by FKTN/fukutin of to the phosphorylated O-mannosyl trisaccharide (N-acetylgalactosamine-beta-3-N-acetylglucosamine-beta-4-(phosphate-6-)mannose), a carbohydrate structure present in alpha-dystroglycan (DAG1) (By similarity). This constitutes the second step in the formation of the ribose 5-phosphate tandem repeat wh…	0.0749652
g11274	0.38297	4.49242	sp|Q96AG4|LRC59_HUMAN	Required for nuclear import of FGF1, but not that of FGF2. Might regulate nuclear import of exogenous FGF1 by facilitating interaction with the nuclear import machinery and by transporting cytosolic FGF1 to, and possibly through, the nuclear pores.	0.0115309
g11275	-2.56762	8.26883	sp|P62329|TYB4_RAT	Plays an important role in the organization of the cytoskeleton. Binds to and sequesters actin monomers (G actin) and therefore inhibits actin polymerization (By similarity).	6.45279e-06
g11276	0.289408	2.21315	sp|Q9NP78|ABCB9_HUMAN	ATP-dependent low-affinity peptide transporter which translocates a broad spectrum of peptides from the cytosol to the lysosomal lumen. Displays a broad peptide length specificity from 6-mer up to at least 59-mer peptides with an optimum of 23-mers. Favors positively charged, aromatic or hydrophobic residues in the N- and C-terminal positions whereas negatively charged residues as well as asparag…	0.213028
g11277	-0.672096	4.99617	sp|Q8WXW3|PIBF1_HUMAN	Plays a role in ciliogenesis.	0.000228025
g11284	-0.747224	2.73941	sp|Q8WXW3|PIBF1_HUMAN	Plays a role in ciliogenesis.	0.00429574
g11287	-0.75872	6.02751	sp|O88809|DCX_MOUSE	Microtubule-associated protein required for initial steps of neuronal dispersion and cortex lamination during cerebral cortex development. May act by competing with the putative neuronal protein kinase DCLK1 in binding to a target protein. May in that way participate in a signaling pathway that is crucial for neuronal interaction before and during migration, possibly as part of a calcium ion-depe…	2.18651e-06
g11288	0.0202018	6.30975	sp|Q9C098|DCLK3_HUMAN		0.881765
g11289	-0.0165551	3.51665			0.93778
g11293	-0.283297	3.75909	sp|Q8N6Q8|MET25_HUMAN	Putative methyltransferase.	0.108169
g11295	-0.357066	4.12107	sp|Q99999|G3ST1_HUMAN	Catalyzes the sulfation of membrane glycolipids. Seems to prefer beta-glycosides at the non-reducing termini of sugar chains attached to a lipid moiety. Catalyzes the synthesis of galactosylceramide sulfate (sulfatide), a major lipid component of the myelin sheath and of monogalactosylalkylacylglycerol sulfate (seminolipid), present in spermatocytes (By similarity). Also acts on lactosylceramide,…	0.0162023
g11296	0.0903314	4.69308	sp|Q96SW2|CRBN_HUMAN	Substrate recognition component of a DCX (DDB1-CUL4-X-box) E3 protein ligase complex that mediates the ubiquitination and subsequent proteasomal degradation of target proteins, such as MEIS2. Normal degradation of key regulatory proteins is required for normal limb outgrowth and expression of the fibroblast growth factor FGF8. May play a role in memory and learning by regulating the assembly and …	0.542012
g11297	0.488882	1.1491	sp|Q0IIF7|UBP14_BOVIN	Proteasome-associated deubiquitinase which releases ubiquitin from the proteasome targeted ubiquitinated proteins. Ensures the regeneration of ubiquitin at the proteasome. Is a reversibly associated subunit of the proteasome and a large fraction of proteasome-free protein exists within the cell. Required for the degradation of the chemokine receptor CXCR4 which is critical for CXCL12-induced cell…	0.442727
g11298	0.482381	5.79457	sp|P40826|UBP14_RABIT	Proteasome-associated deubiquitinase which releases ubiquitin from the proteasome targeted ubiquitinated proteins. Ensures the regeneration of ubiquitin at the proteasome. Is a reversibly associated subunit of the proteasome and a large fraction of proteasome-free protein exists within the cell. Required for the degradation of the chemokine receptor CXCR4 which is critical for CXCL12-induced cell…	2.19574e-05
g11299	0.447913	4.81355	sp|Q06831|SOX4_MOUSE	Transcriptional activator that binds with high affinity to the T-cell enhancer motif 5'-AACAAAG-3' motif.	0.000336243
g11300	-1.12729	2.49839	sp|B4LVU6|PDE6_DROVI	Has a role regulating cGMP transport in Malpighian tubule principal cells.	0.000213777
g11301	-0.879906	0.417684	sp|Q7T1N4|ASIC1_OPSTA	Proton-gated sodium channel; it is activated by a drop of the extracellular pH and then becomes rapidly desensitized. Generates a biphasic current with a fast inactivating and a slow sustained phase. Has high selectivity for sodium ions and can also transport lithium ions with high efficiency. Can also transport potassium ions, but with lower efficiency. It is nearly impermeable to the larger rub…	0.0639361
g11302	-0.196759	1.47966	sp|P55926|ASIC1_RAT	Proton-gated sodium channel; it is activated by a drop of the extracellular pH and then becomes rapidly desensitized. Generates a biphasic current with a fast inactivating and a slow sustained phase. Has high selectivity for sodium ions and can also transport lithium ions with high efficiency. Can also transport potassium ions, but with lower efficiency. It is nearly impermeable to the larger rub…	0.447215
g11303	-0.0389038	5.10717	sp|Q6NXK8|ASIC1_MOUSE	Proton-gated sodium channel; it is activated by a drop of the extracellular pH and then becomes rapidly desensitized. Generates a biphasic current with a fast inactivating and a slow sustained phase. Has high selectivity for sodium ions and can also transport lithium ions with high efficiency. Can also transport potassium ions, but with lower efficiency. It is nearly impermeable to the larger rub…	0.757497
g11305	0.484979	7.19672	sp|P57721|PCBP3_HUMAN	Single-stranded nucleic acid binding protein that binds preferentially to oligo dC.	3.09954e-05
g11309	-0.432128	3.1773	sp|Q91628|ORC2_XENLA	Component of the origin recognition complex (ORC) that binds origins of replication. DNA-binding is ATP-dependent, however specific DNA sequences that define origins of replication have not been identified so far. ORC is required to assemble the pre-replication complex necessary to initiate DNA replication.	0.0189184
g11310	0.111747	9.61169			0.392876
g11311	-0.00565207	8.87454			0.977209
g11313	1.25318	4.93662			4.51595e-10
g11314	1.45917	1.64803			2.9484e-06
g11315	0.0395995	4.24935	sp|Q496Z0|ELP2_RAT	Regulates the ligand-dependent activation of STAT3.	0.795337
g11318	-0.897965	0.781907	sp|Q7K4B3|ELP2_DROME	Acts as subunit of the RNA polymerase II elongator complex, which is a histone acetyltransferase component of the RNA polymerase II (Pol II) holoenzyme and is involved in transcriptional elongation (By similarity). Involved in the regulation of the STAT pathway.	0.0450997
g1132	0.638195	3.52015			0.000313121
g11327	0.131122	3.36867	sp|Q8BHY3|ANO1_MOUSE	Calcium-activated chloride channel (CaCC) which plays an important role in transepithelial anion transport and smooth muscle contraction (PubMed:28561733, PubMed:29236691, PubMed:29236684). Required for the normal functioning of the interstitial cells of Cajal (ICCs) which generate electrical pacemaker activity in gastrointestinal smooth muscles. Acts as a major contributor to basal and stimulate…	0.516495
g11330	0.751971	4.66885	sp|Q9KWN0|AHV_ACTSK		5.63876e-05
g11334	-0.909755	0.748723			0.0301799
g11338	-1.85652	0.81589			0.142542
g1134	-0.00880453	0.609899	sp|Q8TC12|RDH11_HUMAN	Retinol dehydrogenase with a clear preference for NADP. Displays high activity towards 9-cis, 11-cis and all-trans-retinol, and to a lesser extent on 13-cis-retinol (PubMed:12226107, PubMed:12036956, PubMed:29410696). Exhibits a low reductive activity towards unsaturated medium-chain aldehydes such as cis -6-nonenal and no activity toward nonanal or 4-hydroxy-nonenal (PubMed:15865448). Has no deh…	0.986179
g11342	0.822527	0.924122			0.0597705
g11343	-0.897138	2.59185			0.000246962
g11344	0.0278565	3.4885	sp|A5WFR0|PIF1_PSYWF	DNA-dependent ATPase and 5'-3' DNA helicase that efficiently unwinds G-quadruplex (G4) DNA structures. May be involved in resolving commom issues that arise during DNA replication, recombination, and repair.	0.904712
g11345	0.588882	2.08922			0.0166863
g11347	0.357872	4.53862	sp|Q7RTR2|NLRC3_HUMAN	Negative regulator of the innate immune response (PubMed:15705585, PubMed:22863753, PubMed:25277106). Attenuates signaling pathways activated by Toll-like receptors (TLRs) and the DNA sensor STING/TMEM173 in response to pathogen-associated molecular patterns, such as intracellular poly(dA:dT), but not poly(I:C), or in response to DNA virus infection, including that of Herpes simplex virus 1 (HSV1…	0.241311
g1135	0.27094	3.97139	sp|Q8TC12|RDH11_HUMAN	Retinol dehydrogenase with a clear preference for NADP. Displays high activity towards 9-cis, 11-cis and all-trans-retinol, and to a lesser extent on 13-cis-retinol (PubMed:12226107, PubMed:12036956, PubMed:29410696). Exhibits a low reductive activity towards unsaturated medium-chain aldehydes such as cis -6-nonenal and no activity toward nonanal or 4-hydroxy-nonenal (PubMed:15865448). Has no deh…	0.0212183
g11351	1.65219	7.27983	sp|Q7SIB2|CO4A1_BOVIN	Type IV collagen is the major structural component of glomerular basement membranes (GBM), forming a 'chicken-wire' meshwork together with laminins, proteoglycans and entactin/nidogen.	3.99901e-13
g11352	2.05186	9.7327	sp|P08120|CO4A1_DROME	Collagen type IV is specific for basement membranes.	6.02598e-15
g11353	1.88833	7.29615	sp|Q4ZJM7|OTOL1_MOUSE	Collagen-like protein specifically expressed in the inner ear, which provides an organic scaffold for otoconia, a calcium carbonate structure in the saccule and utricle of the ear (PubMed:21655225, PubMed:24748133, PubMed:29076638). Acts as a scaffold for biomineralization: sequesters calcium and forms interconnecting fibrils between otoconia that are incorporated into the calcium crystal structu…	6.15459e-15
g11354	1.52084	6.61531	sp|P05099|MATN1_CHICK	Cartilage matrix protein is a major component of the extracellular matrix of non-articular cartilage. It binds to collagen.	2.27723e-13
g11355	1.87089	9.8651	sp|P27393|CO4A2_ASCSU	Collagen type IV is specific for basement membranes.	9.70209e-13
g11358	1.1868	3.13677			3.54221e-07
g1136	0.270121	6.39281	sp|Q8TC12|RDH11_HUMAN	Retinol dehydrogenase with a clear preference for NADP. Displays high activity towards 9-cis, 11-cis and all-trans-retinol, and to a lesser extent on 13-cis-retinol (PubMed:12226107, PubMed:12036956, PubMed:29410696). Exhibits a low reductive activity towards unsaturated medium-chain aldehydes such as cis -6-nonenal and no activity toward nonanal or 4-hydroxy-nonenal (PubMed:15865448). Has no deh…	0.00337443
g11361	0.219582	1.14849	sp|Q7TNH6|NPHP3_MOUSE	Required for normal ciliary development and function. Inhibits disheveled-1-induced canonical Wnt-signaling activity and may also play a role in the control of non-canonical Wnt signaling that regulates planar cell polarity. Probably acts as a molecular switch between different Wnt signaling pathways. Required for proper convergent extension cell movements.	0.580395
g11363	1.80748	2.96555	sp|P35520|CBS_HUMAN	Hydro-lyase catalyzing the first step of the transsulfuration pathway, where the hydroxyl group of L-serine is displaced by L-homocysteine in a beta-replacement reaction to form L-cystathionine, the precursor of L-cysteine. This catabolic route allows the elimination of L-methionine and the toxic metabolite L-homocysteine (PubMed:23981774, PubMed:20506325, PubMed:23974653). Also involved in the p…	1.36301e-10
g11366	0.32664	7.86667	sp|P35520|CBS_HUMAN	Hydro-lyase catalyzing the first step of the transsulfuration pathway, where the hydroxyl group of L-serine is displaced by L-homocysteine in a beta-replacement reaction to form L-cystathionine, the precursor of L-cysteine. This catabolic route allows the elimination of L-methionine and the toxic metabolite L-homocysteine (PubMed:23981774, PubMed:20506325, PubMed:23974653). Also involved in the p…	0.00159398
g11367	0.15335	6.76159	sp|P22682|CBL_MOUSE	Adapter protein that functions as a negative regulator of many signaling pathways that are triggered by activation of cell surface receptors. Acts as an E3 ubiquitin-protein ligase, which accepts ubiquitin from specific E2 ubiquitin-conjugating enzymes, and then transfers it to substrates promoting their degradation by the proteasome. Recognizes activated receptor tyrosine kinases, including KIT,…	0.103438
g11369	0.778678	3.93856			3.14347e-05
g11370	-7.93748	3.15926	sp|O95373|IPO7_HUMAN	Functions in nuclear protein import, either by acting as autonomous nuclear transport receptor or as an adapter-like protein in association with the importin-beta subunit KPNB1. Acting autonomously, is thought to serve itself as receptor for nuclear localization signals (NLS) and to promote translocation of import substrates through the nuclear pore complex (NPC) by an energy requiring, Ran-depen…	3.40615e-13
g11371	-0.493497	2.57774	sp|P52486|UBCD4_DROME	Catalyzes the covalent attachment of ubiquitin to other proteins.	0.0385088
g11372	0.488222	4.44793	sp|P52486|UBCD4_DROME	Catalyzes the covalent attachment of ubiquitin to other proteins.	6.96321e-05
g11373	0.333001	4.44099	sp|Q54CS8|PEX6_DICDI	Required for biogenesis of peroxisomes.	0.00524127
g1138	0.385286	4.0538	sp|Q96NR8|RDH12_HUMAN	Retinoids dehydrogenase/reductase with a clear preference for NADP. Displays high activity towards 9-cis, 11-cis and all-trans-retinal. Shows very weak activity towards 13-cis-retinol (PubMed:15865448, PubMed:12226107). Also exhibits activity, albeit with lower affinity than for retinaldehydes, towards lipid peroxidation products (C9 aldehydes) such as 4-hydroxynonenal and trans-2-nonenal (PubMed…	0.00233553
g1139	-0.446873	1.27216			0.218399
g11390	0.787087	0.524935			0.0644097
g11391	1.05576	3.57125	sp|Q3ZKN0|S27A1_BOVIN	Mediates the ATP-dependent import of long-chain fatty acids (LCFA) into the cell by mediating their translocation at the plasma membrane. Has also an acyl-CoA ligase activity for long-chain and very-long-chain fatty acids. May act directly as a bona fide transporter, or alternatively, in a cytoplasmic or membrane-associated multimeric protein complex to trap and draw fatty acids towards accumulat…	2.62908e-08
g11392	-0.37691	0.762044	sp|O96024|B3GT4_HUMAN	Involved in GM1/GD1B/GA1 ganglioside biosynthesis.	0.251388
g11394	0.741815	4.03512	sp|Q9C0J1|B3GN4_HUMAN	Beta-1,3-N-acetylglucosaminyltransferase involved in the synthesis of poly-N-acetyllactosamine. Has activity for type 2 oligosaccharides.	6.38796e-05
g11395	0.514754	6.21363	sp|Q9R087|GPC6_MOUSE	Cell surface proteoglycan that bears heparan sulfate. Putative cell surface coreceptor for growth factors, extracellular matrix proteins, proteases and anti-proteases. Enhances migration and invasion of cancer cells through WNT5A signaling (By similarity).	3.36037e-05
g11396	0.288667	4.60057			0.0767899
g11397	0.610905	9.47219	sp|P79384|PCCB_PIG		1.22263e-07
g11398	0.27037	4.97884	sp|Q7SXW3|LRC40_DANRE		0.0203435
g11399	0.562484	4.91936	sp|Q58D84|FSTL1_BOVIN	May modulate the action of some growth factors on cell proliferation and differentiation. Binds heparin (By similarity).	3.07954e-05
g1140	-0.715176	2.41155	sp|G3V9H8|RET_RAT	Receptor tyrosine-protein kinase involved in numerous cellular mechanisms including cell proliferation, neuronal navigation, cell migration, and cell differentiation upon binding with glial cell derived neurotrophic factor family ligands. Phosphorylates PTK2/FAK1. Regulates both cell death/survival balance and positional information. Required for the molecular mechanisms orchestration during inte…	0.00502146
g11400	-0.0333094	5.80782	sp|Q9Y2G3|AT11B_HUMAN	Catalytic component of a P4-ATPase flippase complex which catalyzes the hydrolysis of ATP coupled to the transport of aminophospholipids from the outer to the inner leaflet of various membranes and ensures the maintenance of asymmetric distribution of phospholipids. Phospholipid translocation seems also to be implicated in vesicle formation and in uptake of lipid signaling molecules (Probable). I…	0.744591
g11402	0.257373	6.55483			0.0480437
g11403	-0.0728271	5.38202			0.717298
g11404	-1.75043	0.706489			0.000183561
g11406	0.371565	5.02692	sp|P29183|LIPP_HORSE		0.00499803
g11408	0.107249	3.72858	sp|Q9Z254|GIPC1_RAT	May be involved in G protein-linked signaling.	0.480807
g1141	-1.41595	2.06065	sp|D2IYS2|TORSO_BOMMO	Probable receptor tyrosine kinase. During postembryonic development, involved in the initiation of metamorphosis probably by inducing the production of ecdysone in response to prothoracicotropic hormone (PTTH) (By similarity). Binding to PTTH stimulates activation of canonical MAPK signaling leading to ERK phosphorylation (PubMed:19965758, PubMed:26928300).	0.000392693
g11431	-0.215125	4.81502	sp|P23468|PTPRD_HUMAN	Can bidirectionally induce pre- and post-synaptic differentiation of neurons by mediating interaction with IL1RAP and IL1RAPL1 trans-synaptically. Involved in pre-synaptic differentiation through interaction with SLITRK2.	0.0522383
g11432	0.270905	5.33441	sp|Q64487|PTPRD_MOUSE	Can bidirectionally induce pre- and post-synaptic differentiation of neurons by mediating interaction with IL1RAP and IL1RAPL1 trans-synaptically (PubMed:25908590). Involved in pre-synaptic differentiation through interaction with SLITRK2 (PubMed:25989451).	0.0119701
g11433	0.484289	1.50559			0.192591
g11434	-0.417485	4.59209	sp|P62489|RPB7_RAT	DNA-dependent RNA polymerase catalyzes the transcription of DNA into RNA using the four ribonucleoside triphosphates as substrates. Component of RNA polymerase II which synthesizes mRNA precursors and many functional non-coding RNAs. Pol II is the central component of the basal RNA polymerase II transcription machinery. It is composed of mobile elements that move relative to each other. RPB7 is p…	0.0513722
g11435	0.0260992	2.16485	sp|Q96PM5|ZN363_HUMAN	Mediates E3-dependent ubiquitination and proteasomal degradation of target proteins, including p53/TP53, P73, HDAC1 and CDKN1B. Preferentially acts on tetrameric p53/TP53. Monoubiquitinates the translesion DNA polymerase POLH. Contributes to the regulation of the cell cycle progression. Increases AR transcription factor activity.	0.928902
g11436	1.34479	0.832212	sp|Q95SX7|RTBS_DROME		0.00184456
g11437	0.124964	3.64502	sp|Q96PM5|ZN363_HUMAN	Mediates E3-dependent ubiquitination and proteasomal degradation of target proteins, including p53/TP53, P73, HDAC1 and CDKN1B. Preferentially acts on tetrameric p53/TP53. Monoubiquitinates the translesion DNA polymerase POLH. Contributes to the regulation of the cell cycle progression. Increases AR transcription factor activity.	0.505248
g11438	-0.198364	1.26031	sp|Q95SX7|RTBS_DROME		0.612186
g11439	-0.41574	0.690243			0.386268
g1144	-0.566259	3.9683	sp|Q9JHU4|DYHC1_MOUSE	Cytoplasmic dynein 1 acts as a motor for the intracellular retrograde motility of vesicles and organelles along microtubules. Dynein has ATPase activity; the force-producing power stroke is thought to occur on release of ADP. Plays a role in mitotic spindle assembly and metaphase plate congression.	0.0019605
g11440	-1.53592	1.31481	sp|Q95SX7|RTBS_DROME		1.66935e-05
g11441	-0.424374	4.54452	sp|Q61083|M3K2_MOUSE	Component of a protein kinase signal transduction cascade. Regulates the JNK and ERK5 pathways by phosphorylating and activating MAP2K5 and MAP2K7. Plays a role in caveolae kiss-and-run dynamics (By similarity).	0.00206843
g11443	0.147999	3.84212	sp|O93602|ATF2_CHICK	Transcriptional activator which regulates the transcription of various genes, including those involved in anti-apoptosis, cell growth, and DNA damage response. Dependent on its binding partner, binds to CRE (cAMP response element) consensus sequences (5'-TGACGTCA-3') or to AP-1 (activator protein 1) consensus sequences (5'-TGACTCA-3') (By similarity).	0.295186
g11444	-1.15797	6.15855	sp|Q9H7M6|ZSWM4_HUMAN		2.44685e-07
g11446	-1.12502	6.14249			5.35617e-10
g11453	-2.23625	0.222639			0.00281381
g11455	0.92134	1.14803			0.00626308
g11458	0.353027	1.5296			0.252642
g1146	-0.359552	1.34576	sp|Q498D6|FGFR4_RAT	Tyrosine-protein kinase that acts as cell-surface receptor for fibroblast growth factors and plays a role in the regulation of cell proliferation, differentiation and migration, and in regulation of lipid metabolism, bile acid biosynthesis, glucose uptake, vitamin D metabolism and phosphate homeostasis. Required for normal down-regulation of the expression of CYP7A1, the rate-limiting enzyme in b…	0.286173
g11464	0.525848	1.22656	sp|O14735|CDIPT_HUMAN	Catalyzes the biosynthesis of phosphatidylinositol (PtdIns) as well as PtdIns:inositol exchange reaction. May thus act to reduce an excessive cellular PtdIns content. The exchange activity is due to the reverse reaction of PtdIns synthase and is dependent on CMP, which is tightly bound to the enzyme.	0.0981751
g11465	-0.611623	6.48899	sp|Q5ZKU4|INT2_CHICK	Component of the Integrator complex, a complex involved in the small nuclear RNAs (snRNA) U1 and U2 transcription and in their 3'-box-dependent processing.	1.48221e-06
g11466	-0.460309	5.04442	sp|P07314|GGT1_RAT	Cleaves the gamma-glutamyl bond of extracellular glutathione (gamma-Glu-Cys-Gly), glutathione conjugates, and other gamma-glutamyl compounds. The metabolism of glutathione releases free glutamate and the dipeptide cysteinyl-glycine, which is hydrolyzed to cysteine and glycine by dipeptidases. In the presence of high concentrations of dipeptides and some amino acids, can also catalyze a transpepti…	0.000463145
g11468	0.356632	2.01373	sp|Q8IYT8|ULK2_HUMAN	Serine/threonine-protein kinase involved in autophagy in response to starvation. Acts upstream of phosphatidylinositol 3-kinase PIK3C3 to regulate the formation of autophagophores, the precursors of autophagosomes. Part of regulatory feedback loops in autophagy: acts both as a downstream effector and a negative regulator of mammalian target of rapamycin complex 1 (mTORC1) via interaction with RPT…	0.134318
g11469	0.338897	4.83233			0.00384307
g11470	0.651117	5.82101	sp|Q96LW9|ZSC31_HUMAN	May function as a transcription factor. May be involved in the development of multiple embryonic organs.	5.02967e-06
g11471	0.330662	4.06244	sp|P24044|CALM_PLAFA	Calmodulin mediates the control of a large number of enzymes, ion channels and other proteins by Ca(2+). Among the enzymes to be stimulated by the calmodulin-Ca(2+) complex are a number of protein kinases and phosphatases.	0.0553581
g11472	0.549322	2.76709	sp|Q9Y3E5|PTH2_HUMAN	The natural substrate for this enzyme may be peptidyl-tRNAs which drop off the ribosome during protein synthesis.	0.0135083
g11473	-0.0804853	2.78178	sp|Q9DBR7|MYPT1_MOUSE	Key regulator of protein phosphatase 1C (PPP1C). Mediates binding to myosin. As part of the PPP1C complex, involved in dephosphorylation of PLK1. Capable of inhibiting HIF1AN-dependent suppression of HIF1A activity (By similarity).	0.690026
g11474	0.510029	5.42622	sp|Q9H1D0|TRPV6_HUMAN	Calcium selective cation channel that mediates Ca(2+) uptake in various tissues, including the intestine (PubMed:11097838, PubMed:11278579, PubMed:11248124 PubMed:15184369, PubMed:23612980, PubMed:29258289). Important for normal Ca(2+) ion homeostasis in the body, including bone and skin (By similarity). The channel is activated by low internal calcium level, probably including intracellular calc…	1.90834e-05
g11475	-0.285259	1.26726			0.442504
g11480	-0.333429	1.25943			0.321312
g11481	-3.54467	0.845095			2.62684e-05
g11482	0.494433	0.821155	sp|Q80WQ9|ZBED4_MOUSE		0.371212
g11483	-0.978286	2.00185			0.00118201
g11487	-1.11798	2.77789			2.58928e-07
g11492	-0.323304	3.34048	sp|P16157|ANK1_HUMAN	Attaches integral membrane proteins to cytoskeletal elements; binds to the erythrocyte membrane protein band 4.2, to Na-K ATPase, to the lymphocyte membrane protein GP85, and to the cytoskeletal proteins fodrin, tubulin, vimentin and desmin. Erythrocyte ankyrins also link spectrin (beta chain) to the cytoplasmic domain of the erythrocytes anion exchange protein; they retain most or all of these b…	0.0424058
g11494	0.449089	2.13327	sp|Q7M3K2|PELET_DROME	P-element transposase that specifically mediates transposition of P-elements. Mediates both; precise and imprecise excision.	0.062067
g11496	-0.0771421	4.82809	sp|Q505D1|ANR28_MOUSE	Putative regulatory subunit of protein phosphatase 6 (PP6) that may be involved in the recognition of phosphoprotein substrates. Involved in the PP6-mediated dephosphorylation of NFKBIE opposing its degradation in response to TNF-alpha. Selectively inhibits the phosphatase activity of PPP1C. Targets PPP1C to modulate HNRPK phosphorylation (By similarity).	0.663109
g11497	0.243576	4.22032	sp|Q7ZXE9|TES_XENLA	Scaffold protein that may play a role in cell adhesion, cell spreading and in the reorganization of the actin cytoskeleton. May inhibit cell growth (By similarity). Regulates cranial neural crest migration. Acts together with prickle1 to control axial elongation.	0.0890184
g11498	-0.203618	5.02409	sp|P34743|BTG1_CHICK	Anti-proliferative protein.	0.153741
g115	-1.17086	0.323959			0.0567996
g11500	-0.0956521	3.75539	sp|Q8VCD5|MED17_MOUSE	Component of the Mediator complex, a coactivator involved in the regulated transcription of nearly all RNA polymerase II-dependent genes. Mediator functions as a bridge to convey information from gene-specific regulatory proteins to the basal RNA polymerase II transcription machinery. Mediator is recruited to promoters by direct interactions with regulatory proteins and serves as a scaffold for t…	0.562576
g11501	1.00156	2.82053			0.00011592
g11502	-0.332745	3.34182	sp|Q9QYP2|CELR2_RAT	Receptor that may have an important role in cell/cell signaling during nervous system formation.	0.0664912
g11503	0.220925	6.28079	sp|Q58A65|JIP4_MOUSE	The JNK-interacting protein (JIP) group of scaffold proteins selectively mediates JNK signaling by aggregating specific components of the MAPK cascade to form a functional JNK signaling module (PubMed:12391307, PubMed:15767678). Regulates lysosomal positioning by acting as an adapter protein which links PIP4P1-positive lysosomes to the dynein-dynactin complex (By similarity).	0.0206973
g11504	-0.522218	3.71837	sp|P16157|ANK1_HUMAN	Attaches integral membrane proteins to cytoskeletal elements; binds to the erythrocyte membrane protein band 4.2, to Na-K ATPase, to the lymphocyte membrane protein GP85, and to the cytoskeletal proteins fodrin, tubulin, vimentin and desmin. Erythrocyte ankyrins also link spectrin (beta chain) to the cytoplasmic domain of the erythrocytes anion exchange protein; they retain most or all of these b…	0.00293637
g11505	0.408237	2.19518			0.0412472
g11506	0.143969	2.49509			0.394195
g11509	-0.146116	4.19642	sp|O62852|TRPC5_RABIT	Thought to form a receptor-activated non-selective calcium permeant cation channel. Probably is operated by a phosphatidylinositol second messenger system activated by receptor tyrosine kinases or G-protein coupled receptors. Has also been shown to be calcium-selective. May also be activated by intracellular calcium store depletion.	0.281528
g1151	0.243288	0.862875	sp|Q91147|FGFR2_NOTVI	Tyrosine-protein kinase that acts as cell-surface receptor for fibroblast growth factors and plays an essential role in the regulation of cell proliferation, differentiation, migration and apoptosis, and in the regulation of embryonic development. Required for normal embryonic patterning, limb bud development, lung morphogenesis, osteogenesis and skin development. Plays an essential role in the r…	0.510108
g11511	-0.118456	5.37379	sp|P28568|GTR3_CHICK	Facilitative glucose transporter that can also mediate the uptake of various other monosaccharides across the cell membrane. Mediates the uptake of glucose, 2-deoxyglucose, galactose, mannose, xylose and fucose, and probably also dehydroascorbate. Does not mediate fructose transport.	0.25928
g11515	-1.07704	1.9554	sp|Q05944|HSP70_HYDVU		0.000492979
g11516	-0.272043	2.32375	sp|Q86SS6|SYT9_HUMAN	May be involved in Ca(2+)-dependent exocytosis of secretory vesicles through Ca(2+) and phospholipid binding to the C2 domain or may serve as Ca(2+) sensors in the process of vesicular trafficking and exocytosis.	0.295596
g11517	0.517066	8.99708	sp|P97855|G3BP1_MOUSE	ATP- and magnesium-dependent helicase that plays an essential role in innate immunity. Participates in the DNA-triggered cGAS/STING pathway by promoting the DNA binding and activation of CGAS. Enhances also DDX58-induced type I interferon production probably by helping DDX58 at sensing pathogenic RNA. In addition, plays an essential role in stress granule formation. Unwinds preferentially partial…	9.0221e-07
g11518	-0.342489	2.55061	sp|Q2HJF1|RM53_BOVIN		0.172032
g11519	0.442886	7.93981	sp|A2AVA0|SVEP1_MOUSE	May play a role in the cell attachment process.	0.000857645
g11521	-0.437143	2.88106	sp|Q149N8|SHPRH_HUMAN	E3 ubiquitin-protein ligase involved in DNA repair. Upon genotoxic stress, accepts ubiquitin from the UBE2N-UBE2V2 E2 complex and transfers it to 'Lys-164' of PCNA which had been monoubiquitinated by UBE2A/B-RAD18, promoting the formation of non-canonical poly-ubiquitin chains linked through 'Lys-63'.	0.0602527
g11525	-0.683168	2.47844	sp|Q7TPQ3|SHPRH_MOUSE	E3 ubiquitin-protein ligase involved in DNA repair. Upon genotoxic stress, accepts ubiquitin from the UBE2N-UBE2V2 E2 complex and transfers it to 'Lys-164' of PCNA which had been monoubiquitinated by UBE2A/B-RAD18, promoting the formation of non-canonical poly-ubiquitin chains linked through 'Lys-63'.	0.00401116
g11527	-0.992297	3.58092	sp|Q149N8|SHPRH_HUMAN	E3 ubiquitin-protein ligase involved in DNA repair. Upon genotoxic stress, accepts ubiquitin from the UBE2N-UBE2V2 E2 complex and transfers it to 'Lys-164' of PCNA which had been monoubiquitinated by UBE2A/B-RAD18, promoting the formation of non-canonical poly-ubiquitin chains linked through 'Lys-63'.	2.10632e-06
g11528	1.34376	10.6211	sp|P02466|CO1A2_RAT	Type I collagen is a member of group I collagen (fibrillar forming collagen).	2.75956e-12
g11529	-0.0117512	3.97653	sp|P23610|F8I2_HUMAN	Not known. Possible housekeeping role.	0.958582
g11536	-1.2779	1.27529	sp|P23610|F8I2_HUMAN	Not known. Possible housekeeping role.	0.00588025
g11539	0.0305881	3.10716	sp|Q5RCY3|EMP1_PONAB		0.891542
g11542	-0.347006	0.474266			0.501663
g11543	0.338939	8.65487	sp|Q24799|MYPH_ECHGR		0.00353013
g11544	-0.988965	0.453894			0.0561327
g11545	-0.100287	5.06698	sp|Q60813|ADM1A_MOUSE	May be involved in sperm-egg fusion.	0.467518
g11546	-0.15462	7.90608	sp|Q61072|ADAM9_MOUSE	Cleaves and releases a number of molecules with important roles in tumorigenesis and angiogenesis, such as TEK, KDR, EPHB4, CD40, VCAM1 and CDH5 (PubMed:19273593). May mediate cell-cell, cell-matrix interactions and regulate the motility of cells via interactions with integrins (PubMed:10825303).	0.18946
g11549	-0.731839	0.340534			0.124042
g1155	-0.480423	6.67589	sp|Q86HQ2|ABCG8_DICDI		0.00357818
g11550	0.0116452	5.37296	sp|F8RKV9|VM39_DRYCN	Snake venom zinc metalloproteinase that may impair hemostasis in the prey.	0.930612
g11551	-0.60316	3.55441			0.00156044
g11552	0.405482	5.04578	sp|Q9NBX4|RTXE_DROME		0.00232342
g11553	0.128421	4.99944	sp|P07996|TSP1_HUMAN	Adhesive glycoprotein that mediates cell-to-cell and cell-to-matrix interactions. Binds heparin. May play a role in dentinogenesis and/or maintenance of dentin and dental pulp (By similarity). Ligand for CD36 mediating antiangiogenic properties. Plays a role in ER stress response, via its interaction with the activating transcription factor 6 alpha (ATF6) which produces adaptive ER stress respons…	0.325147
g11554	0.693946	2.11251	sp|Q5EA92|AL14E_BOVIN	Through its interaction with ARL14 and MYO1E, may connect MHC class II-containing cytoplasmic vesicles to the actin network and hence controls the movement of these vesicles along the actin cytoskeleton in dendritic cells.	0.00404309
g11555	-0.537265	4.97994	sp|Q6GPQ6|EDF1_XENLA	Probable transcriptional coactivator.	0.0875581
g11556	-0.0390387	5.56168	sp|Q08603|PGTB2_RAT	Catalyzes the transfer of a geranylgeranyl moiety from geranylgeranyl diphosphate to both cysteines of Rab proteins with the C-terminal sequence -XXCC, -XCXC and -CCXX, such as RAB1A, RAB3A, RAB5A and RAB7A.	0.746284
g11558	-0.386679	1.95044	sp|Q6DHJ1|TYW3_DANRE	Probable S-adenosyl-L-methionine-dependent methyltransferase that acts as a component of the wybutosine biosynthesis pathway. Wybutosine is a hyper modified guanosine with a tricyclic base found at the 3'-position adjacent to the anticodon of eukaryotic phenylalanine tRNA (By similarity).	0.0891538
g11559	0.618013	3.21551	sp|Q5R4R9|NDUF4_PONAB	May be involved in cell proliferation and survival of hormone-dependent tumor cells. Involved in the assembly of mitochondrial NADH:ubiquinone oxidoreductase complex (complex I) (By similarity).	0.000246937
g1156	0.871498	1.61169	sp|Q3B8D5|KATL2_XENLA	Severs microtubules in vitro in an ATP-dependent manner. This activity may promote rapid reorganization of cellular microtubule arrays.	0.00153401
g11560	0.0785232	4.80362	sp|Q9D9V3|ECHD1_MOUSE	Decarboxylases ethylmalonyl-CoA decarboxylase, a potentially toxic metabolite, to form butyryl-CoA, suggesting it might be involved in metabolite proofreading. Also has methylmalonyl-CoA decarboxylase activity at lower level.	0.535828
g11561	-0.193656	1.90058	sp|Q66I61|CX056_DANRE		0.488412
g11563	0.0313081	1.29661	sp|A0JNN3|MED31_BOVIN	Component of the Mediator complex, a coactivator involved in the regulated transcription of nearly all RNA polymerase II-dependent genes. Mediator functions as a bridge to convey information from gene-specific regulatory proteins to the basal RNA polymerase II transcription machinery. Mediator is recruited to promoters by direct interactions with regulatory proteins and serves as a scaffold for t…	0.961429
g11564	0.512382	3.73575	sp|Q5XGI5|WDR83_XENTR	Molecular scaffold protein for various multimeric protein complexes. Acts as a module in the assembly of a multicomponent scaffold for the ERK pathway, linking ERK responses to specific agonists. Also involved in response to hypoxia by acting as a negative regulator of HIF1A/HIF-1-alpha (By similarity).	0.000726024
g11565	-0.772201	3.72137	sp|P72745|Y1101_SYNY3		0.000505417
g11566	-0.851926	1.89864			0.00232085
g11567	-0.439495	4.87116	sp|P32780|TF2H1_HUMAN	Component of the general transcription and DNA repair factor IIH (TFIIH) core complex, which is involved in general and transcription-coupled nucleotide excision repair (NER) of damaged DNA and, when complexed to CAK, in RNA transcription by RNA polymerase II. In NER, TFIIH acts by opening DNA around the lesion to allow the excision of the damaged oligonucleotide and its replacement by a new DNA …	0.000208632
g11569	-1.28048	8.08827	sp|Q2PZL6|FAT4_MOUSE	Cadherins are cell-cell interaction molecules. FAT4 plays a role in the maintenance of planar cell polarity as well as in inhibition of YAP1-mediated neuroprogenitor cell proliferation and differentiation.	2.00237e-10
g11571	0.0649547	8.64475			0.669665
g11572	-0.212341	10.6238	sp|Q60467|CO5A1_CRILO	Type V collagen is a member of group I collagen (fibrillar forming collagen). It is a minor connective tissue component of nearly ubiquitous distribution. Type V collagen binds to DNA, heparan sulfate, thrombospondin, heparin, and insulin (By similarity).	0.214195
g11573	0.404802	4.24216	sp|Q6UPE0|CHDH_RAT		0.00995138
g11575	0.720528	4.57745	sp|Q8BJ64|CHDH_MOUSE		2.28606e-06
g11576	0.0656139	4.01138	sp|P0C2X9|AL4A1_RAT	Irreversible conversion of delta-1-pyrroline-5-carboxylate (P5C), derived either from proline or ornithine, to glutamate. This is a necessary step in the pathway interconnecting the urea and tricarboxylic acid cycles. The preferred substrate is glutamic gamma-semialdehyde, other substrates include succinic, glutaric and adipic semialdehydes (By similarity).	0.697687
g11577	-0.148682	5.76995	sp|Q54RA2|AL4A1_DICDI	Irreversible conversion of delta-1-pyrroline-5-carboxylate (P5C), derived either from proline or ornithine, to glutamate. This is a necessary step in the pathway interconnecting the urea and tricarboxylic acid cycles (By similarity).	0.279967
g11578	0.326639	6.66701	sp|Q9NQX5|NPDC1_HUMAN	Suppresses oncogenic transformation in neural and non-neural cells and down-regulates neural cell proliferation. Might be involved in transcriptional regulation (By similarity).	0.00151683
g11581	-0.20806	4.07282	sp|B9EJR8|DAAF5_MOUSE	Cytoplasmic protein involved in the delivery of the dynein machinery to the motile cilium. It is required for the assembly of the axonemal dynein inner and outer arms, two structures attached to the peripheral outer doublet A microtubule of the axoneme, that play a crucial role in cilium motility.	0.139049
g11587	-1.85856	1.0073	sp|Q86Y56|DAAF5_HUMAN	Cytoplasmic protein involved in the delivery of the dynein machinery to the motile cilium. It is required for the assembly of the axonemal dynein inner and outer arms, two structures attached to the peripheral outer doublet A microtubule of the axoneme, that play a crucial role in cilium motility.	9.52384e-05
g11588	0.146261	1.55803			0.731839
g11589	-0.315623	4.39599			0.0114197
g11590	-0.191674	3.99606	sp|Q5ZKK5|ODFP2_CHICK	Seems to be a major component of sperm tail outer dense fibers (ODF). ODFs are filamentous structures located on the outside of the axoneme in the midpiece and principal piece of the mammalian sperm tail and may help to maintain the passive elastic structures and elastic recoil of the sperm tail (By similarity).	0.296241
g11591	0.510271	4.66944	sp|A0MSJ1|CRA1B_DANRE	May play a role during the calcification of cartilage and the transition of cartilage to bone (By similarity). Together with col27a1a, plays a role in development of the notochord and axial skeleton.	0.000329567
g11593	0.741724	3.28651	sp|Q64739|COBA2_MOUSE	May play an important role in fibrillogenesis by controlling lateral growth of collagen II fibrils.	0.000273788
g11594	1.13229	3.7374	sp|O75884|RBBP9_HUMAN	May play a role in the transformation process due to its capacity to confer resistance to the growth-inhibitory effects of TGF-beta1 through interaction with retinoblastoma and the subsequent displacement of E2F-1.	9.45051e-09
g11595	0.116131	3.72838	sp|Q91VB4|HPS3_MOUSE	Involved in early stages of melanosome biogenesis and maturation.	0.628308
g11596	0.263521	4.14425			0.173148
g11597	-0.206509	0.572984	sp|Q6PAR5|GAPD1_MOUSE	Acts both as a GTPase-activating protein (GAP) and a guanine nucleotide exchange factor (GEF), and participates in various processes such as endocytosis, insulin receptor internalization or LC2A4/GLUT4 trafficking. Acts as a GEF for the Ras-related protein RAB31 by exchanging bound GDP for free GTP, leading to regulate LC2A4/GLUT4 trafficking. In the absence of insulin, it maintains RAB31 in an a…	0.672239
g11602	0.0410212	4.71041	sp|Q6PAR5|GAPD1_MOUSE	Acts both as a GTPase-activating protein (GAP) and a guanine nucleotide exchange factor (GEF), and participates in various processes such as endocytosis, insulin receptor internalization or LC2A4/GLUT4 trafficking. Acts as a GEF for the Ras-related protein RAB31 by exchanging bound GDP for free GTP, leading to regulate LC2A4/GLUT4 trafficking. In the absence of insulin, it maintains RAB31 in an a…	0.77549
g11603	0.45113	5.82084	sp|Q6UPE0|CHDH_RAT		0.000160251
g11604	0.223433	4.61342			0.159836
g11607	0.0263009	4.28052	sp|Q3TQI7|CI078_MOUSE	Involved in the regulation of telomeric heterochromatin assembly and control of telomere length.	0.870532
g1161	0.306424	2.55856			0.157099
g11610	0.176749	1.18255	sp|P21328|RTJK_DROME		0.65599
g11611	0.295067	5.76041	sp|C6KFA3|AGRG6_DANRE	G-protein coupled receptor which is activated by type IV collagen, a major constituent of the basement membrane. Couples to G(i)-proteins as well as G(s)-proteins (PubMed:25118328). Essential for normal differentiation of promyelinating Schwann cells and for normal myelination of axons (PubMed:19745155). Plays also a role in inner ear development (PubMed:24067352).	0.00653165
g11612	-0.315583	2.8757	sp|Q8IZF6|AGRG4_HUMAN	Orphan receptor.	0.155138
g11632	-0.135317	4.95871	sp|Q9R160|ADA24_MOUSE	Plasma membrane protease present on mature sperm that may be involved in sperm function during epididymal maturation and/or fertilization.	0.331894
g11633	-0.735716	3.44223	sp|Q96RW7|HMCN1_HUMAN	Promotes cleavage furrow maturation during cytokinesis in preimplantation embryos. May play a role in the architecture of adhesive and flexible epithelial cell junctions. May play a role during myocardial remodeling by imparting an effect on cardiac fibroblast migration.	0.000985397
g11634	-0.437269	6.18919	sp|Q61824|ADA12_MOUSE	Involved in skeletal muscle regeneration, specifically at the onset of cell fusion. Also involved in macrophage-derived giant cells (MGC) and osteoclast formation from mononuclear precursors.	0.00501312
g11635	-0.531262	2.42611	sp|Q13443|ADAM9_HUMAN	Cleaves and releases a number of molecules with important roles in tumorigenesis and angiogenesis, such as TEK, KDR, EPHB4, CD40, VCAM1 and CDH5. May mediate cell-cell, cell-matrix interactions and regulate the motility of cells via interactions with integrins.	0.0258866
g11636	-0.483793	1.4413			0.180698
g11658	0.366952	6.68036	sp|P48727|GLC7B_CAEEL	Serine/threonine-protein phosphatase essential for chromosomal dynamics during meiosis and mitosis. Antagonizes the function of air-2 in the regulation of chromosome cohesion. Dephosphorylates histone H3 at 'Ser-10'. Also involved in the activation of chloride channel clh-3 during cell swelling and meiotic maturation. Essential for embryogenesis.	0.000298727
g11659	-1.08577	2.13786	sp|Q9NQG7|HPS4_HUMAN	Component of the BLOC-3 complex, a complex that acts as a guanine exchange factor (GEF) for RAB32 and RAB38, promotes the exchange of GDP to GTP, converting them from an inactive GDP-bound form into an active GTP-bound form. The BLOC-3 complex plays an important role in the control of melanin production and melanosome biogenesis and promotes the membrane localization of RAB32 and RAB38 (PubMed:23…	0.000580595
g11669	0.078581	4.62072	sp|A6QLC7|TPC11_BOVIN	Involved in endoplasmic reticulum to Golgi apparatus trafficking at a very early stage.	0.577006
g11670	0.114692	6.48863	sp|Q4FAT7|BGLR_PIG	Plays an important role in the degradation of dermatan and keratan sulfates.	0.279865
g11673	-0.293926	5.76931	sp|Q7T0Q5|NOL10_XENLA		0.00637789
g11674	0.0313245	5.45003	sp|P97852|DHB4_RAT	Bifunctional enzyme acting on the peroxisomal beta-oxidation pathway for fatty acids. Catalyzes the formation of 3-ketoacyl-CoA intermediates from both straight-chain and 2-methyl-branched-chain fatty acids.	0.780082
g11678	0.0745532	5.79116	sp|P51659|DHB4_HUMAN	Bifunctional enzyme acting on the peroxisomal beta-oxidation pathway for fatty acids. Catalyzes the formation of 3-ketoacyl-CoA intermediates from both straight-chain and 2-methyl-branched-chain fatty acids.	0.421504
g11680	0.245998	3.89709	sp|P50430|ARSB_RAT	Removes sulfate groups from chondroitin-4-sulfate (C4S) and regulates its degradation (PubMed:24311516). In the central nervous system, is a regulator of neurite outgrowth and neuronal plasticity, acting through the control of sulfate glycosaminoglycans and neurocan levels (PubMed:24311516). Involved in the regulation of cell adhesion, cell migration and invasion in colonic epithelium (By similar…	0.118028
g11682	0.139411	2.34017	sp|P50430|ARSB_RAT	Removes sulfate groups from chondroitin-4-sulfate (C4S) and regulates its degradation (PubMed:24311516). In the central nervous system, is a regulator of neurite outgrowth and neuronal plasticity, acting through the control of sulfate glycosaminoglycans and neurocan levels (PubMed:24311516). Involved in the regulation of cell adhesion, cell migration and invasion in colonic epithelium (By similar…	0.633375
g11683	0.460125	1.04407	sp|Q5FYB0|ARSJ_HUMAN		0.188037
g11688	0.295898	2.04314	sp|P21328|RTJK_DROME		0.28453
g11692	0.612767	4.8158	sp|Q9JJC6|RIPL1_MOUSE	Neuroprotective protein, which acts by sequestring GAPDH in the cytosol and prevent the apoptotic function of GAPDH in the nucleus (By similarity). Competes with SIAH1 for binding GAPDH (By similarity). Does not regulate lysosomal morphology and distribution (By similarity). Plays a role in the regulation of cell shape and polarity (PubMed:23264467). Plays a role in cellular protein transport, in…	4.98231e-06
g11693	0.625395	2.75353	sp|Q9M0A7|GGP1_ARATH	Involved in glucosinolate biosynthesis. Hydrolyzes the gamma-glutamyl peptide bond of several glutathione (GSH) conjugates to produce Cys-Gly conjugates related to glucosinolates. The gamma-Glu-Cys-Gly-GSH conjugates are the sulfur-donating molecule in glucosinolate biosynthesis (PubMed:19483696, PubMed:21712415). Converts phenylacetohydroximoyl-GSH to benzylglucosinolate (PubMed:19483696). Can u…	0.00344251
g11694	0.137262	9.63427	sp|P39921|TPM1_HYDVU	Tropomyosin, in association with the troponin complex, plays a central role in the calcium dependent regulation of muscle contraction.	0.401988
g11696	0.544096	7.09048	sp|P39921|TPM1_HYDVU	Tropomyosin, in association with the troponin complex, plays a central role in the calcium dependent regulation of muscle contraction.	4.55021e-06
g11697	0.384761	5.91496	sp|P55112|NAS4_CAEEL	Metalloprotease (By similarity). May be involved in digestion.	9.85108e-05
g11698	1.69078	1.74238	sp|P55112|NAS4_CAEEL	Metalloprotease (By similarity). May be involved in digestion.	0.00341324
g11699	-0.608839	5.36938	sp|P70403|CASP_MOUSE	May be involved in intra-Golgi retrograde transport.	9.96213e-06
g1170	0.0228884	3.67459	sp|A0JMA9|KATL2_XENTR	Severs microtubules in vitro in an ATP-dependent manner. This activity may promote rapid reorganization of cellular microtubule arrays.	0.898296
g11702	-1.57153	2.95418	sp|Q13948|CASP_HUMAN	May be involved in intra-Golgi retrograde transport.	2.24745e-08
g11703	-0.648608	4.98518	sp|Q6NW29|RWDD4_HUMAN		1.10546e-05
g11704	-0.62463	2.56899	sp|Q8CIN9|RFFL_RAT	E3 ubiquitin-protein ligase that regulates several biological processes through the ubiquitin-mediated proteasomal degradation of various target proteins. Mediates 'Lys-48'-linked polyubiquitination of PRR5L and its subsequent proteasomal degradation thereby indirectly regulating cell migration through the mTORC2 complex. Also ubiquitinates the caspases CASP8 and CASP10, promoting their proteasom…	0.00233377
g11708	0.875022	3.03869	sp|Q99KR6|RNF34_MOUSE	E3 ubiquitin-protein ligase that regulates several biological processes through the ubiquitin-mediated proteasomal degradation of various target proteins. Ubiquitinates the caspases CASP8 and CASP10, promoting their proteasomal degradation, to negatively regulate cell death downstream of death domain receptors in the extrinsic pathway of apoptosis. May mediate 'Lys-48'-linked polyubiquitination o…	5.48564e-05
g1171	0.354627	6.78833	sp|Q9R1P4|PSA1_MOUSE	Component of the 20S core proteasome complex involved in the proteolytic degradation of most intracellular proteins. This complex plays numerous essential roles within the cell by associating with different regulatory particles. Associated with two 19S regulatory particles, forms the 26S proteasome and thus participates in the ATP-dependent degradation of ubiquitinated proteins. The 26S proteasom…	0.00039006
g11711	-0.256968	1.33723			0.491633
g11714	-0.267365	5.0245	sp|Q9HCF6|TRPM3_HUMAN	Calcium channel mediating constitutive calcium ion entry. Its activity is increased by reduction in extracellular osmolarity, by store depletion and muscarinic receptor activation.	0.0166181
g11717	-0.155114	3.77944	sp|P55011|S12A2_HUMAN	Electrically silent transporter system. Mediates sodium and chloride reabsorption. Plays a vital role in the regulation of ionic balance and cell volume.	0.281896
g11718	-0.126381	2.22917			0.69682
g11723	0.964421	6.04187	sp|Q19269|NAS14_CAEEL	Metalloprotease.	1.23062e-09
g11725	0.773136	8.72734	sp|P62997|TRA2B_RAT	Sequence-specific RNA-binding protein which participates in the control of pre-mRNA splicing. Can either activate or suppress exon inclusion. Acts additively with RBMX to promote exon 7 inclusion of the survival motor neuron SMN2. Activates the splicing of MAPT/Tau exon 10. Alters pre-mRNA splicing patterns by antagonizing the effects of splicing regulators, like RBMX. Binds to the AG-rich SE2 do…	9.09656e-08
g11726	0.486863	5.62636	sp|Q96KC8|DNJC1_HUMAN	May modulate protein synthesis.	1.05083e-05
g11727	-2.07402	2.4265	sp|Q61712|DNJC1_MOUSE	May modulate protein synthesis.	3.48495e-08
g11728	0.676994	10.0837	sp|P49393|RS13_XENLA		2.72072e-06
g11729	-0.0526105	3.69245	sp|P17220|PSA2_RAT	Component of the 20S core proteasome complex involved in the proteolytic degradation of most intracellular proteins. This complex plays numerous essential roles within the cell by associating with different regulatory particles. Associated with two 19S regulatory particles, forms the 26S proteasome and thus participates in the ATP-dependent degradation of ubiquitinated proteins. The 26S proteasom…	0.785335
g1173	0.130947	4.70754	sp|C0HBB2|GLMP_SALSA		0.345047
g11730	0.0791494	6.30582	sp|P25787|PSA2_HUMAN	Component of the 20S core proteasome complex involved in the proteolytic degradation of most intracellular proteins. This complex plays numerous essential roles within the cell by associating with different regulatory particles. Associated with two 19S regulatory particles, forms the 26S proteasome and thus participates in the ATP-dependent degradation of ubiquitinated proteins. The 26S proteasom…	0.612186
g11731	0.319233	1.94037	sp|Q05722|CO9A1_MOUSE	Structural component of hyaline cartilage and vitreous of the eye.	0.175814
g11732	-5.28063	2.51071			5.55874e-12
g11733	1.05973	1.42011	sp|P42297|YXIE_BACSU		0.00156227
g11734	-0.357439	4.79256	sp|P69341|PARN_BOVIN	3'-exoribonuclease that has a preference for poly(A) tails of mRNAs, thereby efficiently degrading poly(A) tails. Exonucleolytic degradation of the poly(A) tail is often the first step in the decay of eukaryotic mRNAs and is also used to silence certain maternal mRNAs translationally during oocyte maturation and early embryonic development. Involved in nonsense-mediated mRNA decay, a critical pro…	0.050167
g11737	-2.03109	0.50383	sp|E7FDW8|TRD7B_DANRE	Component of specific cytoplasmic RNA granules involved in post-transcriptional regulation of specific genes: probably acts by binding to specific mRNAs and regulating their translation. Probably required during spermatogenesis (By similarity).	8.14264e-05
g11739	-0.12232	3.73046	sp|Q8NAT2|TDRD5_HUMAN	Required during spermiogenesis to participate in the repression transposable elements and prevent their mobilization, which is essential for the germline integrity. Probably acts via the piRNA metabolic process, which mediates the repression of transposable elements during meiosis by forming complexes composed of piRNAs and Piwi proteins and govern the methylation and subsequent repression of tra…	0.53902
g1174	-0.566382	3.54926	sp|O15230|LAMA5_HUMAN	Binding to cells via a high affinity receptor, laminin is thought to mediate the attachment, migration and organization of cells into tissues during embryonic development by interacting with other extracellular matrix components.	0.00461851
g11740	-0.435083	3.18796	sp|Q9DE14|ATR_XENLA	Serine/threonine protein kinase which activates checkpoint signaling upon genotoxic stresses such as ionizing radiation (IR), ultraviolet light (UV), or DNA replication stalling, thereby acting as a DNA damage sensor. Recognizes the substrate consensus sequence [ST]-Q. Phosphorylates BRCA1, CHEK1, MCM2, RAD17, RPA2, SMC1 and p53/TP53, which collectively inhibit DNA replication and mitosis and pro…	0.0235679
g11742	-0.222521	3.63613	sp|Q9DE14|ATR_XENLA	Serine/threonine protein kinase which activates checkpoint signaling upon genotoxic stresses such as ionizing radiation (IR), ultraviolet light (UV), or DNA replication stalling, thereby acting as a DNA damage sensor. Recognizes the substrate consensus sequence [ST]-Q. Phosphorylates BRCA1, CHEK1, MCM2, RAD17, RPA2, SMC1 and p53/TP53, which collectively inhibit DNA replication and mitosis and pro…	0.279679
g11744	0.0544528	4.44561			0.718115
g11745	-1.30097	4.75904	sp|Q90623|MYPT1_CHICK	Regulates myosin phosphatase activity.	5.21811e-10
g11746	-0.2317	0.416962			0.651317
g11748	-0.0246492	7.26886	sp|Q20191|NAS13_CAEEL	Metalloprotease.	0.837677
g11749	-0.0118982	7.20214	sp|P49696|SYVC_TAKRU		0.921326
g1175	-0.201933	1.69181	sp|A6QNK1|G3ST1_BOVIN	Catalyzes the sulfation of membrane glycolipids. Seems to prefer beta-glycosides at the non-reducing termini of sugar chains attached to a lipid moiety. Catalyzes the synthesis of HSO3-3-galactosylceramide (sulfatide), a major lipid component of the myelin sheath and of HSO3-3-monogalactosylalkylacylglycerol (seminolipid), present in spermatocytes. Also acts on lactosylceramide, galactosyl 1-alky…	0.368792
g11750	0.00596645	6.67855	sp|P49696|SYVC_TAKRU		0.958667
g11752	-0.795643	3.38062			2.75745e-05
g11753	0.596913	1.79974			0.0872276
g11755	-0.954064	6.74103			9.81509e-08
g11757	-0.523757	2.30603			0.0816716
g11758	-0.139858	2.34096	sp|Q29IM7|CASP8_DROPS	Effector of the programmed cell death (PCD) activators rpr, grim and W. May play an apoptotic role in the germline as well as soma. Role in immune response, required to resist Gram-negative bacterial infections by regulating DptA. Fadd interacts with Dredd, Fadd promotes cleavage of Dredd and is necessary and sufficient for enhancing Dredd-induced apoptosis.	0.625073
g1176	-0.395194	6.49009	sp|P07942|LAMB1_HUMAN	Binding to cells via a high affinity receptor, laminin is thought to mediate the attachment, migration and organization of cells into tissues during embryonic development by interacting with other extracellular matrix components. Involved in the organization of the laminar architecture of cerebral cortex. It is probably required for the integrity of the basement membrane/glia limitans that serves…	0.000323926
g11761	-0.0626425	4.86805	sp|Q9JHX4|CASP8_RAT	Most upstream protease of the activation cascade of caspases responsible for the TNFRSF6/FAS mediated and TNFRSF1A induced cell death. Binding to the adapter molecule FADD recruits it to either receptor. The resulting aggregate called death-inducing signaling complex (DISC) performs CASP8 proteolytic activation. The active dimeric enzyme is then liberated from the DISC and free to activate downst…	0.572076
g11763	0.432161	2.34562	sp|F6XZJ7|SAM15_MOUSE		0.0390668
g11764	-0.562832	2.41377	sp|Q6P2Z3|FOXI1_XENTR	Transcription factor. Essential for ventral specification of the early cephalic (head) ectoderm during gastrulation, playing a role in the 'non-neural' versus 'neural' cell fate choice. Binds to DNA via the target sequence 5'-[AG]TAAA[CT]A-3', with 5'-ATAAACA-3' being the preferred binding site (By similarity).	0.00486867
g11765	-0.915608	4.63124	sp|P54366|GSC_DROME	Appears to regulate regional development of specific tissues. Can rescue axis polarity in UV-radiated Xenopus embryos.	9.86673e-05
g11766	0.0177925	4.25549	sp|O43916|CHST1_HUMAN	Sulfotransferase that utilizes 3'-phospho-5'-adenylyl sulfate (PAPS) as sulfonate donor to catalyze the transfer of sulfate to position 6 of galactose (Gal) residues of keratan. Has a preference for sulfating keratan sulfate, but it also transfers sulfate to the unsulfated polymer. The sulfotransferase activity on sialyl LacNAc structures is much higher than the corresponding desialylated substra…	0.913476
g11767	-0.0151913	4.45923	sp|Q7ZUS1|VRK1_DANRE	Serine/threonine kinase involved in Golgi disassembly during the cell cycle.	0.92504
g1177	-0.0247556	8.15893	sp|Q00174|LAMA_DROME	Binding to cells via a high affinity receptor, laminin is thought to mediate the attachment, migration and organization of cells into tissues during embryonic development by interacting with other extracellular matrix components. Activates presynaptic signaling involving integrin alpha-PS3/beta-nu and Fak to suppress neuromuscular junction (NMJ) growth during larval development and during low cra…	0.84814
g11774	-0.676009	1.35222	sp|Q7ZU45|TTC25_DANRE	Required for the docking of the outer dynein arm to cilia, hence plays an essential role in cilia motility.	0.0784094
g11779	-0.624523	4.59295	sp|Q7ZU45|TTC25_DANRE	Required for the docking of the outer dynein arm to cilia, hence plays an essential role in cilia motility.	0.000139056
g11780	1.77409	4.39909	sp|Q62445|SP4_MOUSE	Binds to GT and GC boxes promoters elements. Probable transcriptional activator. Required for normal male reproductive behavior.	2.77105e-13
g11781	0.389002	5.07822	sp|Q15750|TAB1_HUMAN	May be an important signaling intermediate between TGFB receptors and MAP3K7/TAK1. May play an important role in mammalian embryogenesis.	0.000565279
g11785	0.665401	4.11387	sp|Q8CF89|TAB1_MOUSE	May be an important signaling intermediate between TGFB receptors and MAP3K7/TAK1. May play an important role in mammalian embryogenesis.	3.46047e-06
g11786	0.0846851	4.1733	sp|P61315|G3ST3_MOUSE	Transfers a sulfate to position 3 of non-reducing beta-galactosyl residues in N-glycans and core2-branched O-glycans. Has high activity towards Gal-beta-1,4-GlcNAc, Gal-beta-1,4(Fuc-alpha-1,3)GlcNAc and lower activity towards Gal-beta-1,3(Fuc-alpha-1,4)GlcNAc (By similarity).	0.649511
g11787	0.624953	3.83562	sp|Q9NSI2|F207A_HUMAN		0.00209239
g11789	0.717251	3.42406	sp|P54922|ADPRH_HUMAN	Specifically acts as a arginine mono-ADP-ribosylhydrolase by mediating the removal of mono-ADP-ribose attached to arginine residues on proteins.	2.40569e-05
g1179	-0.558284	3.71462	sp|Q8TF46|DI3L1_HUMAN	Putative cytoplasm-specific catalytic component of the RNA exosome complex which has 3'->5' exoribonuclease activity and participates in a multitude of cellular RNA processing and degradation events. In the cytoplasm, the RNA exosome complex is involved in general mRNA turnover and specifically degrades inherently unstable mRNAs containing AU-rich elements (AREs) within their 3' untranslated regi…	0.00126966
g11790	-0.0495548	1.77568	sp|Q5I0M0|SETMR_RAT	Histone methyltransferase that methylates 'Lys-4' and 'Lys-36' of histone H3, 2 specific tags for epigenetic transcriptional activation. Specifically mediates dimethylation of H3 'Lys-36'.	0.877887
g11791	0.244714	3.6903	sp|Q8BG94|COMD7_MOUSE	May modulate activity of cullin-RING E3 ubiquitin ligase (CRL) complexes. Associates with the NF-kappa-B complex and suppresses its transcriptional activity.	0.0849722
g11792	0.897343	5.07664	sp|Q4R5C7|SRP14_MACFA	Signal-recognition-particle assembly has a crucial role in targeting secretory proteins to the rough endoplasmic reticulum membrane. SRP9 together with SRP14 and the Alu portion of the SRP RNA, constitutes the elongation arrest domain of SRP. The complex of SRP9 and SRP14 is required for SRP RNA binding (By similarity).	6.82242e-07
g11794	0.412536	6.75284	sp|Q9NBX4|RTXE_DROME		5.45229e-05
g11798	-0.0919614	2.24401	sp|Q8TD10|MIPO1_HUMAN		0.656423
g11799	-0.0108053	5.05431	sp|O73606|KCNG2_CHICK	Potassium channel subunit. Modulates channel activity (By similarity).	0.934972
g118	-0.034033	3.69919	sp|Q9Z139|ROR1_MOUSE	Has very low kinase activity in vitro and is unlikely to function as a tyrosine kinase in vivo (By similarity). Receptor for ligand WNT5A which activate downstream NFkB signaling pathway and may result in the inhibition of WNT3A-mediated signaling (By similarity). In inner ear, crucial for spiral ganglion neurons to innervate auditory hair cells (PubMed:27162350).	0.847375
g1180	0.0414708	3.45569	sp|Q5T1V6|DDX59_HUMAN		0.776896
g11801	-0.120515	3.35866			0.528837
g11803	-0.44516	2.87796	sp|Q8L7C8|RWA1_ARATH	Probable O-acetyltransferase involved in the acetylation of xylan during secondary wall biosynthesis.	0.0398714
g11805	-0.107158	3.46324			0.553121
g11808	-1.27425	1.77001	sp|Q6GMK6|TSN9_DANRE		4.12097e-05
g11809	-0.400766	2.63166	sp|Q26499|IM23_SCHHA		0.0380263
g1181	-0.268512	2.72481	sp|Q7ZTY7|USE1_DANRE	SNARE that may be involved in targeting and fusion of Golgi-derived retrograde transport vesicles with the ER.	0.166657
g11811	-0.0580935	5.78424	sp|P53041|PPP5_HUMAN	Serine/threonine-protein phosphatase that dephosphorylates a myriad of proteins involved in different signaling pathways including the kinases CSNK1E, ASK1/MAP3K5, PRKDC and RAF1, the nuclear receptors NR3C1, PPARG, ESR1 and ESR2, SMAD proteins and TAU/MAPT. Implicated in wide ranging cellular processes, including apoptosis, differentiation, DNA damage response, cell survival, regulation of ion c…	0.550656
g11812	-0.520891	1.24821	sp|Q8IV42|PSTK_HUMAN	Specifically phosphorylates seryl-tRNA(Sec) to O-phosphoseryl-tRNA(Sec), an activated intermediate for selenocysteine biosynthesis.	0.112816
g11816	0.685419	2.06874	sp|Q1LU86|F92A1_DANRE	May play a role in ciliogenesis.	0.00810338
g11819	0.161267	3.79062	sp|Q8K211|COPT1_MOUSE	High-affinity, saturable copper transporter involved in dietary copper uptake.	0.331131
g1182	-0.167558	0.511184	sp|Q2TBK4|HAUS1_BOVIN	Contributes to mitotic spindle assembly, maintenance of centrosome integrity and completion of cytokinesis as part of the HAUS augmin-like complex.	0.742752
g11820	-0.302177	0.819277	sp|Q04202|TCB2_CAEBR	Probably essential for transposable element Tcb2 transposition.	0.4092
g11821	0.433376	1.85453	sp|Q1LU86|F92A1_DANRE	May play a role in ciliogenesis.	0.11539
g11829	0.745699	6.26004	sp|Q7LKY2|ADDH_SCHPO		1.86722e-07
g11831	-0.533442	2.91829	sp|Q9Y253|POLH_HUMAN	DNA polymerase specifically involved in the DNA repair by translesion synthesis (TLS) (PubMed:10385124, PubMed:11743006, PubMed:24449906). Due to low processivity on both damaged and normal DNA, cooperates with the heterotetrameric (REV3L, REV7, POLD2 and POLD3) POLZ complex for complete bypass of DNA lesions. Inserts one or 2 nucleotide(s) opposite the lesion, the primer is further extended by t…	0.0198438
g11833	0.473967	1.4552			0.131143
g11839	0.481232	2.568	sp|Q9JJN0|POLH_MOUSE	DNA polymerase specifically involved in the DNA repair by translesion synthesis (TLS) (PubMed:10871396). Due to low processivity on both damaged and normal DNA, cooperates with the heterotetrameric (REV3L, REV7, POLD2 and POLD3) POLZ complex for complete bypass of DNA lesions. Inserts one or 2 nucleotide(s) opposite the lesion, the primer is further extended by the tetrameric POLZ complex. In the…	0.0129753
g11845	0.219269	5.12946	sp|P29350|PTN6_HUMAN	Modulates signaling by tyrosine phosphorylated cell surface receptors such as KIT and the EGF receptor/EGFR. The SH2 regions may interact with other cellular components to modulate its own phosphatase activity against interacting substrates. Together with MTUS1, induces UBE2V2 expression upon angiotensin II stimulation. Plays a key role in hematopoiesis.	0.0467902
g11852	-0.249051	5.51057	sp|Q2TBV5|TF2H2_BOVIN	Component of the general transcription and DNA repair factor IIH (TFIIH) core complex, which is involved in general and transcription-coupled nucleotide excision repair (NER) of damaged DNA and, when complexed to CAK, in RNA transcription by RNA polymerase II. In NER, TFIIH acts by opening DNA around the lesion to allow the excision of the damaged oligonucleotide and its replacement by a new DNA …	0.028127
g11853	-1.44188	4.9603	sp|Q26636|CATL_SARPE	Important for the overall degradation of proteins in lysosomes. Required for differentiation of imaginal disks.	1.88699e-07
g11855	-1.46574	0.82623			0.00160932
g11859	-0.0214384	1.16523	sp|A6H639|TCTE1_MOUSE	Component of the nexin-dynein regulatory complex (N-DRC) a key regulator of ciliary/flagellar motility which maintains the alignment and integrity of the distal axoneme and regulates microtubule sliding in motile axonemes. May play a role in the assembly of N-DRC (By similarity). Required for sperm motility (PubMed:28630322).	0.950406
g11861	0.600814	5.65465	sp|Q5ZKN1|CDK9_CHICK	Member of the cyclin-dependent kinase pair (CDK9/cyclin-T) complex, also called positive transcription elongation factor b (P-TEFb), which facilitates the transition from abortive to production elongation by phosphorylating the CTD (C-terminal domain) of the large subunit of RNA polymerase II (RNAP II), SUPT5H and RDBP. The CDK9/cyclin-K complex has also a kinase activity toward CTD of RNAP II an…	2.19964e-07
g11865	-0.424431	1.44227			0.251335
g11868	-0.0529109	2.49244			0.830129
g11869	-0.5826	0.865137			0.211488
g11870	0.119981	1.08248	sp|Q9NBX4|RTXE_DROME		0.74121
g11872	-0.309185	9.69288	sp|Q8AYA3|SLB2_DEIAC	Agglucetin specifically causes platelet aggregation and surface exposure of integrin alpha-IIb/beta-3 with a GPIb-(GP1BA-) dependent manner in washed platelets. It binds to human platelets in a saturable manner, and its binding is specifically blocked by anti-GP Ib mAb. It regulates endothelial cell survival and promotes angiogenesis by activating integrin alpha-v/beta-3 signaling through FAK/pho…	0.0222427
g11873	-0.537092	3.29285	sp|A7S4N4|SERIC_NEMVE	Enhances the incorporation of serine into phosphatidylserine and sphingolipids.	0.000772869
g11874	0.137641	1.54768			0.690474
g11878	-0.977331	3.60971			7.80951e-06
g11879	-0.173481	1.87526			0.650477
g11880	1.8984	5.03369	sp|Q17RW2|COOA1_HUMAN	May participate in regulating type I collagen fibrillogenesis at specific anatomical locations during fetal development.	1.05758e-14
g11886	0.622197	2.64603			0.00381885
g11890	-0.0713575	2.17899	sp|B0FPE9|NLRP3_MACMU	As the sensor component of the NLRP3 inflammasome, plays a crucial role in innate immunity and inflammation. In response to pathogens and other damage-associated signals, initiates the formation of the inflammasome polymeric complex, made of NLRP3, PYCARD and CASP1 (or possibly CASP4/CASP11). Recruitment of proCASP1 to the inflammasome promotes its activation and CASP1-catalyzed IL1B and IL18 mat…	0.869405
g11893	0.246547	1.04385			0.445486
g11894	-0.358492	3.30284	sp|Q9ESJ4|SPN90_MOUSE	Has an important role in stress fiber formation induced by active diaphanous protein homolog 1 (DRF1) (By similarity). Induces microspike formation, in vivo. In vitro, stimulates N-WASP-induced ARP2/3 complex activation in the absence of CDC42. May play an important role in the maintenance of sarcomere and/or in the assembly of myofibrils into sarcomeres. Implicated in regulation of actin polymer…	0.0434239
g11897	0.560469	5.32821	sp|P48809|RB27C_DROME	This protein is a component of ribonucleosomes. Could be needed to organize a concentration gradient of a dorsalizing morphogen (Dm) originating in the germinal vesicle.	1.66777e-05
g11898	0.675253	7.39537	sp|P48809|RB27C_DROME	This protein is a component of ribonucleosomes. Could be needed to organize a concentration gradient of a dorsalizing morphogen (Dm) originating in the germinal vesicle.	4.18548e-07
g11902	-0.851052	2.06561	sp|D3YXG0|HMCN1_MOUSE	Promotes cleavage furrow maturation during cytokinesis in preimplantation embryos (PubMed:21215633). May play a role in the architecture of adhesive and flexible epithelial cell junctions (PubMed:17015624). May play a role during myocardial remodeling by imparting an effect on cardiac fibroblast migration (PubMed:24951538).	0.00229725
g11903	-0.144302	5.74498	sp|Q09575|YRD6_CAEEL		0.419415
g11904	0.939053	1.45334			0.0262244
g11905	-0.474533	0.785096			0.306184
g11908	-0.150395	1.10696	sp|P34457|YMD3_CAEEL		0.680106
g11915	-0.344231	2.8246	sp|Q9WVR3|SHIP2_RAT	Phosphatidylinositol (PtdIns) phosphatase that specifically hydrolyzes the 5-phosphate of phosphatidylinositol-3,4,5-trisphosphate (PtdIns(3,4,5)P3) to produce PtdIns(3,4)P2, thereby negatively regulating the PI3K (phosphoinositide 3-kinase) pathways. Plays a central role in regulation of PI3K-dependent insulin signaling, although the precise molecular mechanisms and signaling pathways remain unc…	0.029583
g11916	0.226242	5.55808	sp|Q8NHP1|ARK74_HUMAN	Can reduce the dialdehyde protein-binding form of aflatoxin B1 (AFB1) to the non-binding AFB1 dialcohol. May be involved in protection of liver against the toxic and carcinogenic effects of AFB1, a potent hepatocarcinogen (By similarity).	0.0311262
g11917	-0.813797	3.16918	sp|Q5XII5|WAP53_RAT	RNA chaperone that plays a key role in telomere maintenance and RNA localization to Cajal bodies. Specifically recognizes and binds the Cajal body box (CAB box) present in both small Cajal body RNAs (scaRNAs) and telomerase RNA template component (TERC). Essential component of the telomerase holoenzyme complex, a ribonucleoprotein complex essential for the replication of chromosome termini that e…	0.000718572
g11920	-0.365002	2.35689	sp|Q60525|WAP53_MESAU	RNA chaperone that plays a key role in telomere maintenance and RNA localization to Cajal bodies. Specifically recognizes and binds the Cajal body box (CAB box) present in both small Cajal body RNAs (scaRNAs) and telomerase RNA template component (TERC). Essential component of the telomerase holoenzyme complex, a ribonucleoprotein complex essential for the replication of chromosome termini that e…	0.160411
g11924	-0.282149	4.41823	sp|Q60525|WAP53_MESAU	RNA chaperone that plays a key role in telomere maintenance and RNA localization to Cajal bodies. Specifically recognizes and binds the Cajal body box (CAB box) present in both small Cajal body RNAs (scaRNAs) and telomerase RNA template component (TERC). Essential component of the telomerase holoenzyme complex, a ribonucleoprotein complex essential for the replication of chromosome termini that e…	0.0480871
g11925	-0.000586268	5.60187	sp|Q9BUZ4|TRAF4_HUMAN	Adapter protein and signal transducer that links members of the tumor necrosis factor receptor (TNFR) family to different signaling pathways. Plays a role in the activation of NF-kappa-B and JNK, and in the regulation of cell survival and apoptosis. Regulates activation of NF-kappa-B in response to signaling through Toll-like receptors. Required for normal skeleton development, and for normal dev…	0.996672
g11927	0.177115	3.74234			0.32777
g11928	-0.0153328	6.55899	sp|A4FUD3|U5S1_BOVIN	Required for pre-mRNA splicing as component of the spliceosome, including pre-catalytic, catalytic and post-catalytic spliceosomal complexes. Component of the U5 snRNP and the U4/U6-U5 tri-snRNP complex, a building block of the spliceosome.	0.900714
g11929	0.896464	4.36833	sp|Q8WMY2|FPPS_BOVIN	Key enzyme in isoprenoid biosynthesis which catalyzes the formation of farnesyl diphosphate (FPP), a precursor for several classes of essential metabolites including sterols, dolichols, carotenoids, and ubiquinones. FPP also serves as substrate for protein farnesylation and geranylgeranylation. Catalyzes the sequential condensation of isopentenyl pyrophosphate with the allylic pyrophosphates, dim…	7.10985e-08
g1193	0.038784	4.80769	sp|Q15650|TRIP4_HUMAN	Transcription coactivator which associates with nuclear receptors, transcriptional coactivators including EP300, CREBBP and NCOA1, and basal transcription factors like TBP and TFIIA to facilitate nuclear receptors-mediated transcription. May thereby play an important role in establishing distinct coactivator complexes under different cellular conditions. Plays a role in thyroid hormone receptor a…	0.792734
g11930	-0.237724	5.31406	sp|Q8IVB4|SL9A9_HUMAN	May act in electroneutral exchange of protons for Na(+) across membranes. Involved in the effusion of Golgi luminal H(+) in exchange for cytosolic cations. Involved in organelle ion homeostasis by contributing to the maintenance of the unique acidic pH values of the Golgi and post-Golgi compartments in the cell.	0.060106
g11933	-0.274558	4.68492	sp|Q9QXX8|NUFP1_MOUSE	Binds RNA.	0.0223683
g11940	-0.466794	4.68525	sp|Q641W3|NUFP1_RAT	Binds RNA.	0.000305809
g11941	-0.212827	7.05323	sp|O15042|SR140_HUMAN		0.0689007
g11942	0.434635	2.22234	sp|Q6PBI8|TM177_DANRE	Plays a role in the early steps of cytochrome c oxidase subunit II (MT-CO2/COX2) maturation and is required for the stabilization of COX20 and the newly synthesized MT-CO2/COX2 protein.	0.140115
g11943	0.0273975	2.37118			0.911068
g11944	-0.530309	1.45677	sp|Q8C4U2|TM145_MOUSE		0.0909209
g11946	-0.174211	5.88862			0.0892586
g11948	-0.555126	4.53846	sp|Q02370|NDUA2_BOVIN	Accessory subunit of the mitochondrial membrane respiratory chain NADH dehydrogenase (Complex I), that is believed not to be involved in catalysis. Complex I functions in the transfer of electrons from NADH to the respiratory chain. The immediate electron acceptor for the enzyme is believed to be ubiquinone.	0.112019
g11949	0.0502408	1.37344			0.881314
g11950	-0.0400078	7.50325	sp|Q8CFH6|SIK2_MOUSE	Phosphorylates 'Ser-789' of IRS1 in insulin-stimulated adipocytes, potentially modulating the efficiency of insulin signal transduction. Inhibits CREB activity by phosphorylating and inhibiting activity of TORCs, the CREB-specific coactivators, like CRTC2/TORC2 and CRTC3/TORC3 in response to cAMP signaling (PubMed:29211348).	0.732737
g11952	-0.639617	3.34789	sp|Q9V3B4|FADD_DROME	Component of the IMD signaling pathway and is required for the host defense against Gram-negative bacteria. Interacts with Dredd, promotes cleavage of Dredd and is necessary and sufficient for enhancing Dredd-induced apoptosis.	9.02793e-05
g11956	-0.991094	7.08929	sp|Q5THJ4|VP13D_HUMAN	Functions in promoting mitochondrial clearance by mitochondrial autophagy (mitophagy), also possibly by positively regulating mitochondrial fission (PubMed:29307555, PubMed:29604224). Mitophagy plays an important role in regulating cell health and mitochondrial size and homeostasis.	8.16857e-06
g11957	-0.11678	5.19371			0.302302
g11963	-0.677594	1.31452	sp|P20241|NRG_DROME	The long isoform may play a role in neural and glial cell adhesion in the developing embryo. The short isoform may be a more general cell adhesion molecule involved in other tissues and imaginal disk morphogenesis. Vital for embryonic development. Essential for septate junctions. Septate junctions, which are the equivalent of vertebrates tight junctions, are characterized by regular arrays of tra…	0.0155601
g11965	-0.673901	2.84004	sp|O55005|ROBO1_RAT	Receptor for SLIT1 and SLIT2 that mediates cellular responses to molecular guidance cues in cellular migration, including axonal navigation at the ventral midline of the neural tube and projection of axons to different regions during neuronal development. Interaction with the intracellular domain of FLRT3 mediates axon attraction towards cells expressing NTN1 (By similarity). In axon growth cones…	0.00105365
g11969	-0.296971	3.81094	sp|D3YXG0|HMCN1_MOUSE	Promotes cleavage furrow maturation during cytokinesis in preimplantation embryos (PubMed:21215633). May play a role in the architecture of adhesive and flexible epithelial cell junctions (PubMed:17015624). May play a role during myocardial remodeling by imparting an effect on cardiac fibroblast migration (PubMed:24951538).	0.0454968
g1197	0.267374	2.9435			0.100108
g11970	0.650379	5.0885	sp|Q6NUB2|CW15A_XENLA	Involved in pre-mRNA splicing as component of the spliceosome.	6.86056e-06
g11971	-0.0285358	2.56671	sp|Q6NZE7|F122B_MOUSE		0.912376
g11974	-1.91685	5.41031	sp|P12036|NFH_HUMAN	Neurofilaments usually contain three intermediate filament proteins: L, M, and H which are involved in the maintenance of neuronal caliber. NF-H has an important function in mature axons that is not subserved by the two smaller NF proteins.	2.41605e-06
g11977	0.31566	4.30658			0.0177633
g11978	0.919913	1.61874	sp|Q5EA92|AL14E_BOVIN	Through its interaction with ARL14 and MYO1E, may connect MHC class II-containing cytoplasmic vesicles to the actin network and hence controls the movement of these vesicles along the actin cytoskeleton in dendritic cells.	0.0118058
g11979	-0.207193	1.00053			0.57424
g11980	-0.622984	1.78831			0.0991552
g11981	-0.0479759	2.80804	sp|Q9NYG2|ZDHC3_HUMAN	Palmitoyltransferase with broad specificity (PubMed:21926431, PubMed:23034182). Palmitoylates GABA receptors on their gamma subunit (GABRG1, GABRG2 and GABRG3), which regulates synaptic clustering and/or cell surface stability (By similarity). Palmitoylates glutamate receptors GRIA1 and GRIA2, which leads to their retention in Golgi. May also palmitoylate DLG4, DNAJC5 and SNAP25 (By similarity).	0.830967
g11982	0.425547	5.00365	sp|Q9R062|GLYG_MOUSE	Self-glucosylates, via an inter-subunit mechanism, to form an oligosaccharide primer that serves as substrate for glycogen synthase.	0.0013139
g11984	-0.883593	2.84747	sp|Q8R123|FAD1_MOUSE	Catalyzes the adenylation of flavin mononucleotide (FMN) to form flavin adenine dinucleotide (FAD) coenzyme.	0.000162261
g11985	0.117269	4.14327	sp|Q711G3|IAH1_RAT	Probable lipase.	0.443808
g11988	-0.690303	7.27003	sp|Q54G05|LRRX1_DICDI		0.00278823
g1199	1.2447	6.99695	sp|P42674|BP10_PARLI	Could be involved in the differentiation of ectodermal lineages and subsequent patterning of the embryo.	2.5898e-05
g11994	1.57582	4.40207			2.15242e-11
g11995	-0.375532	1.80022			0.13928
g11996	0.989536	5.38152	sp|A5PN43|TM175_DANRE	Organelle-specific potassium channel specifically responsible for potassium conductance in endosomes and lysosomes. Forms a potassium-permeable leak-like channel.	3.91613e-08
g11999	-0.835527	0.925573			0.0379659
g12	0.762907	1.90663			0.0376228
g12003	-1.07015	3.94034	sp|Q7TNH6|NPHP3_MOUSE	Required for normal ciliary development and function. Inhibits disheveled-1-induced canonical Wnt-signaling activity and may also play a role in the control of non-canonical Wnt signaling that regulates planar cell polarity. Probably acts as a molecular switch between different Wnt signaling pathways. Required for proper convergent extension cell movements.	0.00212945
g12005	0.469759	0.480385	sp|O08726|GALR2_RAT	Receptor for the hormone galanin, GALP and spexin-1. The activity of this receptor is mediated by G proteins that activate the phospholipase C/protein kinase C pathway (via G(q)) and that inhibit adenylyl cyclase (via G(i)).	0.354322
g1201	-0.200962	3.14866	sp|Q8C1W1|VASH1_MOUSE	Tyrosine carboxypeptidase that removes the C-terminal tyrosine residue of alpha-tubulin, thereby regulating microtubule dynamics and function (PubMed:29146868). Acts as an angiogenesis inhibitor: inhibits migration, proliferation and network formation by endothelial cells as well as angiogenesis (PubMed:19204325). This inhibitory effect is selective to endothelial cells as it does not affect the …	0.425198
g1202	0.265893	1.9208			0.362447
g12023	0.106097	5.61767	sp|Q641A1|GLD2A_XENLA	Cytoplasmic poly(A) RNA polymerase that adds successive AMP monomers to the 3'-end of specific RNAs, forming a poly(A) tail. In contrast to the canonical nuclear poly(A) RNA polymerase, it only adds poly(A) to selected cytoplasmic mRNAs during oocyte maturation. Plays a central role during oocyte maturation by mediating polyadenylation of dormant mRNAs, which contain 5'AAUAAA-3' sequence in their…	0.293774
g12024	1.25676	9.37071	sp|Q4PM12|RL36_IXOSC	Component of the large ribosomal subunit.	9.12437e-09
g12029	0.51152	1.99645	sp|P11680|PROP_MOUSE	A positive regulator of the alternate pathway of complement. It binds to and stabilizes the C3- and C5-convertase enzyme complexes.	0.114177
g12030	0.253225	6.53755	sp|Q920M9|SIAH1_RAT	E3 ubiquitin-protein ligase that mediates ubiquitination and subsequent proteasomal degradation of target proteins. E3 ubiquitin ligases accept ubiquitin from an E2 ubiquitin-conjugating enzyme in the form of a thioester and then directly transfers the ubiquitin to targeted substrates. Mediates E3 ubiquitin ligase activity either through direct binding to substrates or by functioning as the essen…	0.00986765
g12032	-0.203461	3.66814	sp|Q9P2E2|KIF17_HUMAN	Transports vesicles containing N-methyl-D-aspartate (NMDA) receptor 2B along microtubules.	0.176092
g12033	0.103828	6.19919	sp|A7S7F2|BYST_NEMVE	Required for processing of 20S pre-rRNA precursor and biogenesis of 40S ribosomal subunits.	0.228916
g12034	-0.708487	2.69726	sp|Q8N8Q8|COX18_HUMAN	Mitochondrial membrane insertase required for the translocation of the C-terminus of cytochrome c oxidase subunit II (MT-CO2/COX2) across the mitochondrial inner membrane. Plays a role in MT-CO2/COX2 maturation following the COX20-mediated stabilization of newly synthesized MT-CO2/COX2 protein and before the action of the metallochaperones SCO1/2. Essential for the assembly and stability of the m…	0.00322811
g12035	-1.428	3.63665			6.98657e-07
g12036	0.0862984	2.0963	sp|Q5R7D0|COX18_PONAB	Mitochondrial membrane insertase required for the translocation of the C-terminus of cytochrome c oxidase subunit II (MT-CO2/COX2) across the mitochondrial inner membrane. Plays a role in MT-CO2/COX2 maturation following the COX20-mediated stabilization of newly synthesized MT-CO2/COX2 protein and before the action of the metallochaperones SCO1/2. Essential for the assembly and stability of the m…	0.755602
g12037	-1.423	1.13233	sp|A7S7F2|BYST_NEMVE	Required for processing of 20S pre-rRNA precursor and biogenesis of 40S ribosomal subunits.	6.59297e-05
g12038	0.193854	10.6634			0.135811
g12039	-0.656823	3.0193	sp|Q505D9|TRI67_MOUSE		0.000197234
g12040	0.0968726	2.23424			0.786841
g12043	0.161238	6.42829	sp|P26990|ARF6_CHICK	GTP-binding protein involved in protein trafficking; regulates endocytic recycling and cytoskeleton remodeling. May contribute to the regulation of dendritic branching, filopodia extension and dendritic spine development (By similarity).	0.118922
g12044	-0.324156	2.81714			0.0730831
g12046	0.612063	5.98975	sp|Q63150|DPYS_RAT	Catalyzes the second step of the reductive pyrimidine degradation, the reversible hydrolytic ring opening of dihydropyrimidines. Can catalyze the ring opening of 5,6-dihydrouracil to N-carbamyl-alanine and of 5,6-dihydrothymine to N-carbamyl-amino isobutyrate.	1.12304e-06
g12048	0.778671	10.309	sp|P62282|RS11_RAT		1.95626e-05
g12050	-2.15137	0.682012	sp|Q3ZCU0|YK006_HUMAN		0.112245
g12054	-0.0417491	5.71317	sp|Q6NZZ4|TM107_DANRE	May play a role in cilia formation and embryonic patterning.	0.773252
g12056	-0.429946	5.56919			0.0285662
g12057	0.68081	7.58431	sp|Q60HC3|HNRPF_MACFA	Component of the heterogeneous nuclear ribonucleoprotein (hnRNP) complexes which provide the substrate for the processing events that pre-mRNAs undergo before becoming functional, translatable mRNAs in the cytoplasm. Plays a role in the regulation of alternative splicing events. Binds G-rich sequences in pre-mRNAs and keeps target RNA in an unfolded state (By similarity).	1.41055e-07
g12058	0.869543	6.97587	sp|Q5ZM16|RBM22_CHICK	Required for pre-mRNA splicing as component of the activated spliceosome. Involved in the first step of pre-mRNA splicing. Binds directly to the internal stem-loop (ISL) domain of the U6 snRNA and to the pre-mRNA intron near the 5' splice site during the activation and catalytic phases of the spliceosome cycle.	2.38273e-09
g12059	0.875738	10.7245	sp|Q8X034|RL15_NEUCR		3.15693e-09
g12061	1.17551	7.95472	sp|Q08DQ2|GFPT2_BOVIN	Controls the flux of glucose into the hexosamine pathway. Most likely involved in regulating the availability of precursors for N- and O-linked glycosylation of proteins (By similarity).	6.52632e-12
g12065	0.365748	3.78617	sp|Q63035|NLRP6_RAT	As the sensor component of the NLRP6 inflammasome, plays a crucial role in innate immunity and inflammation. In response to yet unidentified signals, initiates the formation of the inflammasome polymeric complex, made of NLRP6, PYCARD and CASP1. Recruitment of proCASP1 to the inflammasome promotes its activation and CASP1-catalyzed IL1B and IL18 maturation and secretion in the extracellular milie…	0.128013
g12068	-0.152178	5.39606	sp|D3YXG0|HMCN1_MOUSE	Promotes cleavage furrow maturation during cytokinesis in preimplantation embryos (PubMed:21215633). May play a role in the architecture of adhesive and flexible epithelial cell junctions (PubMed:17015624). May play a role during myocardial remodeling by imparting an effect on cardiac fibroblast migration (PubMed:24951538).	0.224489
g12069	-0.521809	3.94111			0.00105828
g1207	0.473971	4.80102	sp|A5PN43|TM175_DANRE	Organelle-specific potassium channel specifically responsible for potassium conductance in endosomes and lysosomes. Forms a potassium-permeable leak-like channel.	0.000109338
g12071	-0.0378284	7.82886	sp|Q9EQU5|SET_MOUSE	Multitasking protein, involved in apoptosis, transcription, nucleosome assembly and histone chaperoning. Isoform 2 anti-apoptotic activity is mediated by inhibition of the GZMA-activated DNase, NME1. In the course of cytotoxic T-lymphocyte (CTL)-induced apoptosis, GZMA cleaves SET, disrupting its binding to NME1 and releasing NME1 inhibition. Isoform 1 and isoform 2 are potent inhibitors of prote…	0.697933
g12073	-1.50379	5.67372	sp|A2AN08|UBR4_MOUSE	E3 ubiquitin-protein ligase which is a component of the N-end rule pathway. Recognizes and binds to proteins bearing specific N-terminal residues that are destabilizing according to the N-end rule, leading to their ubiquitination and subsequent degradation. Together with clathrin, forms meshwork structures involved in membrane morphogenesis and cytoskeletal organization. Regulates integrin-mediat…	1.10116e-09
g12074	-1.32538	6.1159	sp|Q2TL32|UBR4_RAT	E3 ubiquitin-protein ligase which is a component of the N-end rule pathway. Recognizes and binds to proteins bearing specific N-terminal residues that are destabilizing according to the N-end rule, leading to their ubiquitination and subsequent degradation. Together with clathrin, forms meshwork structures involved in membrane morphogenesis and cytoskeletal organization. Regulates integrin-mediat…	1.13766e-06
g12075	-1.59589	5.34035	sp|Q5T4S7|UBR4_HUMAN	E3 ubiquitin-protein ligase which is a component of the N-end rule pathway. Recognizes and binds to proteins bearing specific N-terminal residues that are destabilizing according to the N-end rule, leading to their ubiquitination and subsequent degradation. Together with clathrin, forms meshwork structures involved in membrane morphogenesis and cytoskeletal organization. Regulates integrin-mediat…	3.72872e-07
g12076	-1.04063	3.82094	sp|A2AN08|UBR4_MOUSE	E3 ubiquitin-protein ligase which is a component of the N-end rule pathway. Recognizes and binds to proteins bearing specific N-terminal residues that are destabilizing according to the N-end rule, leading to their ubiquitination and subsequent degradation. Together with clathrin, forms meshwork structures involved in membrane morphogenesis and cytoskeletal organization. Regulates integrin-mediat…	2.96044e-05
g12077	0.0927177	8.59218	sp|Q5T4S7|UBR4_HUMAN	E3 ubiquitin-protein ligase which is a component of the N-end rule pathway. Recognizes and binds to proteins bearing specific N-terminal residues that are destabilizing according to the N-end rule, leading to their ubiquitination and subsequent degradation. Together with clathrin, forms meshwork structures involved in membrane morphogenesis and cytoskeletal organization. Regulates integrin-mediat…	0.513627
g12078	-0.0992099	4.01001	sp|Q9VE04|RM55_DROME	Involved in mitochondrial biogenesis and G2/M phase cell cycle progression.	0.747401
g1208	0.623428	2.94307	sp|A5PN43|TM175_DANRE	Organelle-specific potassium channel specifically responsible for potassium conductance in endosomes and lysosomes. Forms a potassium-permeable leak-like channel.	0.00152193
g12084	0.193838	3.87126	sp|P91119|PDE5_CAEEL	Redundantly with pde-1, plays a role in the AFD thermosensory neurons to regulate microvilli receptive ending morphology, possibly by regulating cGMP levels.	0.195708
g12085	0.620428	1.62769	sp|A8Y1P7|BRE4_CAEBR	Catalyzes the transfer of galactose onto proteins or lipids. Required for susceptibility to pore-forming crystal toxins in conjunction with bre-1, bre-2 and bre-3 (By similarity).	0.0290892
g12086	0.310091	5.39291			0.00626308
g12087	-0.0390383	4.01284	sp|Q8IYG6|LRC56_HUMAN	Required for the assembly of dynein arms.	0.802956
g12091	0.612129	9.12924	sp|Q96AE4|FUBP1_HUMAN	Regulates MYC expression by binding to a single-stranded far-upstream element (FUSE) upstream of the MYC promoter. May act both as activator and repressor of transcription.	2.51566e-06
g12092	0.0850338	3.76692	sp|P0DKB4|T3HPD_SACKO	Catalyzes the dehydration of trans-3-hydroxy-L-proline to delta-1-pyrroline-2-carboxylate (Pyr2C).	0.61119
g12093	0.0269926	4.01716	sp|Q8JZK9|HMCS1_MOUSE	This enzyme condenses acetyl-CoA with acetoacetyl-CoA to form HMG-CoA, which is the substrate for HMG-CoA reductase.	0.853301
g12094	0.652741	5.27094	sp|O18994|GPX5_PIG	May constitute a glutathione peroxidase-like protective system against peroxide damage in sperm membrane lipids. Since the purified porcine enzyme has very little activity towards hydrogen peroxide or organic hydroperoxides the protective effect is not likely to be exerted by its enzymatic activity. Instead, may protect sperm from premature acrosome reaction in the epididymis by binding to lipid …	2.93449e-06
g12095	-0.282585	6.7211	sp|Q767L0|ABCF1_PIG	Required for efficient Cap- and IRES-mediated mRNA translation initiation. Not involved in the ribosome biogenesis (By similarity).	0.0139575
g12096	0.376589	4.78558	sp|P14173|DDC_RAT	Catalyzes the decarboxylation of L-3,4-dihydroxyphenylalanine (DOPA) to dopamine, L-5-hydroxytryptophan to serotonin and L-tryptophan to tryptamine.	0.00173415
g12098	-0.206373	4.07412	sp|Q05910|ADAM8_MOUSE	Possible involvement in extravasation of leukocytes.	0.282582
g12099	0.352035	3.64534			0.0369111
g12100	0.347601	7.17574	sp|P14173|DDC_RAT	Catalyzes the decarboxylation of L-3,4-dihydroxyphenylalanine (DOPA) to dopamine, L-5-hydroxytryptophan to serotonin and L-tryptophan to tryptamine.	0.00013436
g12109	0.896216	2.01936			0.00329983
g12119	-2.19241	2.80268	sp|Q6NZ07|NCLN_DANRE	Antagonizes Nodal signaling and subsequent organization of axial structures during mesodermal patterning. Ectopic expression results in cyclopia, due to a defect in mesendoderm patterning.	9.4239e-11
g1212	-1.3563	4.13905			1.8895e-05
g12120	0.671456	8.01098	sp|P50280|MMP7_RAT	Degrades casein, gelatins of types I, III, IV, and V, and fibronectin. Activates procollagenase (By similarity).	1.36687e-06
g12122	0.336872	7.45764	sp|Q9GLE4|MMP14_BOVIN	Endopeptidase that degrades various components of the extracellular matrix such as collagen. Activates progelatinase A. Essential for pericellular collagenolysis and modeling of skeletal and extraskeletal connective tissues during development. May be involved in actin cytoskeleton reorganization by cleaving PTK7. Acts as a positive regulator of cell growth and migration via activation of MMP15 in…	0.00603847
g12126	1.17329	5.5928	sp|Q08E00|RASLC_BOVIN		2.51534e-07
g12128	-0.530621	1.05869	sp|Q2PZL6|FAT4_MOUSE	Cadherins are cell-cell interaction molecules. FAT4 plays a role in the maintenance of planar cell polarity as well as in inhibition of YAP1-mediated neuroprogenitor cell proliferation and differentiation.	0.116173
g12131	0.502678	1.01418			0.214281
g12134	0.501866	1.41292			0.122393
g12137	0.280749	7.09547	sp|Q5F480|ITPK1_CHICK	Kinase that can phosphorylate various inositol polyphosphate such as Ins(3,4,5,6)P4 or Ins(1,3,4)P3. Phosphorylates Ins(3,4,5,6)P4 at position 1 to form Ins(1,3,4,5,6)P5. This reaction is thought to have regulatory importance, since Ins(3,4,5,6)P4 is an inhibitor of plasma membrane Ca(2+)-activated Cl(-) channels, while Ins(1,3,4,5,6)P5 is not. Also phosphorylates Ins(1,3,4)P3 on O-5 and O-6 to f…	0.025182
g12139	-0.217418	3.28787			0.26237
g1214	-1.24191	1.95145			0.00432911
g12143	0.13421	3.0023			0.543382
g12144	-0.117409	3.25213	sp|Q6AXY4|DPOD2_RAT	As a component of the trimeric and tetrameric DNA polymerase delta complexes (Pol-delta3 and Pol-delta4, respectively), plays a role in high fidelity genome replication, including in lagging strand synthesis, and repair. Pol-delta3 and Pol-delta4 are characterized by the absence or the presence of POLD4. They exhibit differences in catalytic activity. Most notably, Pol-delta3 shows higher proofre…	0.514417
g12147	-0.552822	3.08684	sp|P49004|DPOD2_BOVIN	As a component of the trimeric and tetrameric DNA polymerase delta complexes (Pol-delta3 and Pol-delta4, respectively), plays a role in high fidelity genome replication, including in lagging strand synthesis, and repair. Pol-delta3 and Pol-delta4 are characterized by the absence or the presence of POLD4. They exhibit differences in catalytic activity. Most notably, Pol-delta3 shows higher proofre…	0.0139213
g12148	-0.0440549	6.49124	sp|Q63850|NUP62_MOUSE	Essential component of the nuclear pore complex. The N-terminal is probably involved in nucleocytoplasmic transport. The C-terminal is involved in protein-protein interaction probably via coiled-coil formation, promotes its association with centrosomes and may function in anchorage of p62 to the pore complex. Plays a role in mitotic cell cycle progression by regulating centrosome segregation, cen…	0.770051
g12149	0.618559	5.63004	sp|P26369|U2AF2_MOUSE	Plays a role in pre-mRNA splicing and 3'-end processing. By recruiting PRPF19 and the PRP19C/Prp19 complex/NTC/Nineteen complex to the RNA polymerase II C-terminal domain (CTD), and thereby pre-mRNA, may couple transcription to splicing. Required for the export of mRNA out of the nucleus, even if the mRNA is encoded by an intron-less gene. Positively regulates pre-mRNA 3'-end processing by recrui…	1.63431e-06
g1215	-0.59865	5.66075	sp|Q8IZD2|KMT2E_HUMAN	Associates with chromatin regions downstream of transcriptional start sites of active genes and thus regulates gene transcription (PubMed:23629655, PubMed:24130829, PubMed:23798402). Chromatin interaction is mediated via the binding to tri-methylated histone H3 at 'Lys-4' (H3K4me3) (PubMed:24130829, PubMed:23798402). Key regulator of hematopoiesis involved in terminal myeloid differentiation and …	4.86637e-05
g12150	-0.158114	6.02744	sp|Q24562|U2AF2_DROME	Necessary for the splicing of pre-mRNA. Binds to the polypyrimidine tract of introns early during spliceosome assembly (By similarity).	0.37912
g12151	0.606952	2.42146			0.00624126
g12154	0.0843123	5.40148	sp|O75154|RFIP3_HUMAN	Acts as a regulator of endocytic traffic by participating in membrane delivery. Required for the abcission step in cytokinesis, possibly by acting as an 'address tag' delivering recycling endosome membranes to the cleavage furrow during late cytokinesis. Also required for the structural integrity of the endosomal recycling compartment during interphase. May play a role in breast cancer cell motil…	0.435073
g12156	-0.602964	0.939996			0.0954833
g12158	-0.8828	1.00305	sp|P54394|DING_BACSU	3'-5' exonuclease.	0.011306
g1216	0.386636	8.23831	sp|H9BW96|RAB7_EPICO	Key regulator in endo-lysosomal trafficking. Governs early-to-late endosomal maturation, microtubule minus-end as well as plus-end directed endosomal migration and positioning, and endosome-lysosome transport through different protein-protein interaction cascades. Plays important roles in microbial pathogen infection and survival, as well as in participating in the life cycle of viruses (By simil…	0.00128816
g12161	-0.27648	2.42757	sp|Q8NDA2|HMCN2_HUMAN		0.234102
g12162	0.762075	0.996422			0.0213883
g12164	-1.08008	0.917876	sp|Q80SU7|GVIN1_MOUSE		0.0298714
g12166	0.227915	2.28832	sp|C6FG12|NLRC5_ICTPU	Probable regulator of the NF-kappa-B and type I interferon signaling pathways. May also regulate the type II interferon signaling pathway. Plays a role in homeostatic control of innate immunity and in antiviral defense mechanisms (By similarity).	0.571914
g12178	-0.362526	4.42523	sp|P81274|GPSM2_HUMAN	Plays an important role in mitotic spindle pole organization via its interaction with NUMA1 (PubMed:11781568, PubMed:15632202, PubMed:21816348). Required for cortical dynein-dynactin complex recruitment during metaphase (PubMed:22327364). Plays a role in metaphase spindle orientation (PubMed:22327364). Plays also an important role in asymmetric cell divisions (PubMed:21816348). Has guanine nucleo…	0.0121194
g12179	-0.667932	0.195777			0.177936
g1218	0.815288	0.77937			0.0390197
g12180	-0.636991	3.51365	sp|P48508|GSH0_RAT		0.000438904
g12181	0.287108	3.98329	sp|A2BIG9|LSMD1_DANRE	Auxillary component of the N-terminal acetyltransferase C (NatC) complex which catalyzes acetylation of N-terminal methionine residues.	0.0308406
g12183	0.457601	5.49744	sp|Q9D1A2|CNDP2_MOUSE	Hydrolyzes a variety of dipeptides including L-carnosine but has a strong preference for Cys-Gly. Catalyzes the production of N-lactoyl-amino acids from lactate and amino acids by reverse proteolysis.	1.33201e-05
g12187	0.593361	4.48665	sp|Q9D1A2|CNDP2_MOUSE	Hydrolyzes a variety of dipeptides including L-carnosine but has a strong preference for Cys-Gly. Catalyzes the production of N-lactoyl-amino acids from lactate and amino acids by reverse proteolysis.	1.06288e-05
g12189	-1.30368	5.11266	sp|Q8ILR9|YPF17_PLAF7		2.77473e-07
g12199	-0.124021	3.63899			0.42474
g12200	-0.610957	5.53452	sp|Q4R945|TTK_MACFA	Phosphorylates proteins on serine, threonine, and tyrosine. Probably associated with cell proliferation. Essential for chromosome alignment by enhancing AURKB activity (via direct CDCA8 phosphorylation) at the centromere, and for the mitotic checkpoint (By similarity).	0.000101605
g12201	-1.03141	1.15767	sp|Q810N6|ANR45_MOUSE		0.00350288
g12202	0.314735	3.41501	sp|A5PK45|GT251_BOVIN	Beta-galactosyltransferase that transfers beta-galactose to hydroxylysine residues of type I collagen. By acting on collagen glycosylation, facilitates the formation of collagen triple helix. Also involved in the biosynthesis of collagen type IV.	0.0244996
g12203	0.168968	6.65097	sp|P13834|GYS1_RABIT	Transfers the glycosyl residue from UDP-Glc to the non-reducing end of alpha-1,4-glucan.	0.0695835
g12205	-0.312713	2.92513			0.0844927
g12207	0.749387	2.95725	sp|P21328|RTJK_DROME		0.000885147
g12208	-0.94865	1.22825			0.0214635
g1221	-0.344201	0.965285			0.325711
g12211	-0.513048	3.09926	sp|Q9GKR6|CAYP2_MACFA		0.00826173
g12213	-0.259377	4.16233	sp|B3EWZ3|CADN_ACRMI		0.0884655
g12214	-0.909402	3.6223	sp|B0V2N1|PTPRS_MOUSE	Cell surface receptor that binds to glycosaminoglycans, including chondroitin sulfate proteoglycans and heparan sulfate proteoglycans (PubMed:19833921, PubMed:21454754, PubMed:22406547). Binding to chondroitin sulfate and heparan sulfate proteoglycans has opposite effects on PTPRS oligomerization and regulation of neurite outgrowth (PubMed:21454754). Contributes to the inhibition of neurite and a…	1.0234e-05
g12215	0.116202	2.11045	sp|O43826|G6PT1_HUMAN	Inorganic phosphate and glucose-6-phosphate antiporter of the endoplasmic reticulum. Transports cytoplasmic glucose-6-phosphate into the lumen of the endoplasmic reticulum and translocates inorganic phosphate into the opposite direction. Forms with glucose-6-phosphatase the complex responsible for glucose production through glycogenolysis and gluconeogenesis. Hence, it plays a central role in hom…	0.693781
g12217	0.124204	5.58441	sp|Q24276|CDC37_DROME	Co-chaperone that binds to numerous kinases and promotes their interaction with the Hsp90 complex, resulting in stabilization and promotion of their activity. Required for cytokinesis and chromosome segregation in mitosis and male meiosis.	0.220984
g12218	0.315178	4.81844	sp|O57476|CDC37_CHICK	Co-chaperone that binds to numerous kinases and promotes their interaction with the Hsp90 complex, resulting in stabilization and promotion of their activity.	0.0381035
g12219	-0.642932	4.8939	sp|A7RNG8|CCD22_NEMVE		4.10738e-06
g12220	0.766135	2.40432	sp|Q5M843|OGFD3_RAT		0.00120002
g12221	0.814254	1.76198			0.00763414
g12223	-0.355228	7.94929	sp|D3ZDI6|MYLIP_RAT	E3 ubiquitin-protein ligase that mediates ubiquitination and subsequent proteasomal degradation of myosin regulatory light chain (MRLC), LDLR, VLDLR and LRP8. Activity depends on E2 enzymes of the UBE2D family. Proteasomal degradation of MRLC leads to inhibit neurite outgrowth in presence of NGF by counteracting the stabilization of MRLC by saposin-like protein (CNPY2/MSAP) and reducing CNPY2-sti…	0.000321374
g12231	-0.737583	7.56979	sp|P81439|EQST_ACTEQ	Potent inhibitor of papain-like cysteine proteinases.	1.10008e-07
g12232	-0.381065	4.58949	sp|P33402|GCYA2_HUMAN	Has guanylyl cyclase on binding to the beta-1 subunit.; Isoform 2 acts as a negative regulator of guanylyl cyclase activity as it forms non-functional heterodimers with the beta subunits.	0.0678904
g12235	0.215479	1.78109	sp|Q04202|TCB2_CAEBR	Probably essential for transposable element Tcb2 transposition.	0.493895
g12236	0.170647	4.24566			0.560069
g12237	0.576144	3.25848			0.015445
g12239	-0.682061	3.51517	sp|B3EWZ3|CADN_ACRMI		0.000223498
g12245	-0.854919	1.70317			0.00451654
g12254	-0.767306	4.23883	sp|B3EWZ3|CADN_ACRMI		5.22528e-05
g12259	-1.25719	3.67484	sp|Q80ZF8|AGRB3_MOUSE	Receptor that plays a role in the regulation of synaptogenesis and dendritic spine formation at least partly via interaction with ELMO1 and RAC1 activity (PubMed:23628982). Promotes myoblast fusion through ELMO/DOCK1 (By similarity).	2.25773e-08
g12262	0.327607	1.80543			0.242851
g12264	0.777691	7.18229	sp|O08585|CLCA_MOUSE	Clathrin is the major protein of the polyhedral coat of coated pits and vesicles. Acts as component of the TACC3/ch-TOG/clathrin complex proposed to contribute to stabilization of kinetochore fibers of the mitotic spindle by acting as inter-microtubule bridge (By similarity).	6.36398e-09
g12265	-1.11051	1.93825	sp|O60469|DSCAM_HUMAN	Cell adhesion molecule that plays a role in neuronal self-avoidance. Promotes repulsion between specific neuronal processes of either the same cell or the same subtype of cells. Mediates within retinal amacrine and ganglion cell subtypes both isoneuronal self-avoidance for creating an orderly dendritic arborization and heteroneuronal self-avoidance to maintain the mosaic spacing between amacrine …	0.000159685
g12273	0.287084	3.99894	sp|Q9Y3C6|PPIL1_HUMAN	Involved in pre-mRNA splicing as component of the spliceosome (PubMed:11991638, PubMed:28502770, PubMed:28076346). PPIases accelerate the folding of proteins. It catalyzes the cis-trans isomerization of proline imidic peptide bonds in oligopeptides (PubMed:16595688).	0.0778498
g12274	0.509585	4.39703	sp|G5ECQ2|FRIZ2_CAEEL	Receptor for Wnt proteins (PubMed:19855022, PubMed:20711352). Most frizzled receptors are coupled to the beta-catenin canonical signaling pathway, which leads to the activation of disheveled proteins, inhibition of gsk-3 kinase, nuclear accumulation of beta-catenin and activation of Wnt target genes. A second signaling pathway involving PKC and calcium fluxes has been seen for some family members…	0.00433083
g12275	-0.402325	1.61714	sp|Q2M3R5|S35G1_HUMAN	May play a role in intracellular calcium sensing and homeostasis. May act as a negative regulator of plasma membrane calcium-transporting ATPases preventing calcium efflux from the cell.	0.113486
g12276	0.728125	5.05933	sp|Q5M8Y1|SPCS2_XENTR	Microsomal signal peptidase is a membrane-bound endoproteinase that removes signal peptides from nascent proteins as they are translocated into the lumen of the endoplasmic reticulum.	0.00304443
g12277	0.520525	4.3536	sp|Q5SRI9|MANEA_HUMAN		0.000526912
g12279	-2.02952	0.731843	sp|Q6DD38|TRIAB_XENLA	Involved in the modulation of the mitochondrial apoptotic pathway by ensuring the accumulation of cardiolipin (CL) in mitochondrial membranes. The triap1:prelid1 complex probably functions as a phosphatidic acid (PA) transporter across the mitochondrion intermembrane space to provide PA for cardiolipin CL synthesis in the inner membrane. Likewise, the triap1:prelid3a complex mediates the transfer…	0.000160276
g1228	-0.10574	3.56113	sp|Q96RW7|HMCN1_HUMAN	Promotes cleavage furrow maturation during cytokinesis in preimplantation embryos. May play a role in the architecture of adhesive and flexible epithelial cell junctions. May play a role during myocardial remodeling by imparting an effect on cardiac fibroblast migration.	0.527668
g12280	0.562471	4.45064	sp|Q6TGY8|EMC2_DANRE		4.35056e-05
g12281	0.0271129	2.75205	sp|P29052|TF2B_DROME	General factor that plays a major role in the activation of eukaryotic genes transcribed by RNA polymerase II.	0.895091
g1229	0.351479	2.02034	sp|D3YXG0|HMCN1_MOUSE	Promotes cleavage furrow maturation during cytokinesis in preimplantation embryos (PubMed:21215633). May play a role in the architecture of adhesive and flexible epithelial cell junctions (PubMed:17015624). May play a role during myocardial remodeling by imparting an effect on cardiac fibroblast migration (PubMed:24951538).	0.177519
g12290	0.159784	3.06299	sp|Q5R886|TF2B_PONAB	General transcription factor that plays a role in transcription initiation by RNA polymerase II (Pol II). Involved in the pre-initiation complex (PIC) formation and Pol II recruitment at promoter DNA. Together with the TATA box-bound TBP forms the core initiation complex and provides a bridge between TBP and the Pol II-TFIIF complex. Released from the PIC early following the onset of transcriptio…	0.412113
g12291	0.650548	5.11511	sp|Q96RW7|HMCN1_HUMAN	Promotes cleavage furrow maturation during cytokinesis in preimplantation embryos. May play a role in the architecture of adhesive and flexible epithelial cell junctions. May play a role during myocardial remodeling by imparting an effect on cardiac fibroblast migration.	1.31489e-07
g1230	0.893889	1.50914	sp|D3YXG0|HMCN1_MOUSE	Promotes cleavage furrow maturation during cytokinesis in preimplantation embryos (PubMed:21215633). May play a role in the architecture of adhesive and flexible epithelial cell junctions (PubMed:17015624). May play a role during myocardial remodeling by imparting an effect on cardiac fibroblast migration (PubMed:24951538).	0.00186125
g1231	-0.0965635	2.05965	sp|D3YXG0|HMCN1_MOUSE	Promotes cleavage furrow maturation during cytokinesis in preimplantation embryos (PubMed:21215633). May play a role in the architecture of adhesive and flexible epithelial cell junctions (PubMed:17015624). May play a role during myocardial remodeling by imparting an effect on cardiac fibroblast migration (PubMed:24951538).	0.707483
g12316	0.488546	6.41334	sp|Q5RC80|RBM39_PONAB	Transcriptional coactivator for steroid nuclear receptors ESR1/ER-alpha and ESR2/ER-beta, and JUN/AP-1 (By similarity). May be involved in pre-mRNA splicing process.	1.0366e-05
g12319	-0.0953307	2.65152	sp|Q9HCK4|ROBO2_HUMAN	Receptor for SLIT2, and probably SLIT1, which are thought to act as molecular guidance cue in cellular migration, including axonal navigation at the ventral midline of the neural tube and projection of axons to different regions during neuronal development.	0.69682
g12322	0.320084	5.06155	sp|P40240|CD9_MOUSE	Integral membrane protein associated with integrins, which regulates different processes, such as sperm-egg fusion, platelet activation and aggregation, and cell adhesion (PubMed:10700183, PubMed:10634790, PubMed:10634791, PubMed:14715942). Present at the cell surface of oocytes and plays a key role in sperm-egg fusion, possibly by organizing multiprotein complexes and the morphology of the membr…	0.0223189
g12323	-0.720442	3.07478			0.000398135
g12326	-0.332649	1.31379	sp|Q95LP5|AXDN1_MACFA		0.284379
g12331	-0.2053	4.95141	sp|Q68F67|DEN1A_XENLA	Guanine nucleotide exchange factor (GEF) regulating clathrin-mediated endocytosis through RAB35 activation. Promotes the exchange of GDP to GTP, converting inactive GDP-bound RAB35 into its active GTP-bound form. Regulates clathrin-mediated endocytosis of synaptic vesicles and mediates exit from early endosomes. Binds phosphatidylinositol-phosphates (PtdInsPs), with some preference for PtdIns(3)P.	0.0793959
g12332	0.337791	5.57463			0.00401707
g12333	-0.192134	1.78875	sp|P26186|MGMT_CRIGR	Involved in the cellular defense against the biological effects of O6-methylguanine (O6-MeG) and O4-methylthymine (O4-MeT) in DNA. Repairs the methylated nucleobase in DNA by stoichiometrically transferring the methyl group to a cysteine residue in the enzyme. This is a suicide reaction: the enzyme is irreversibly inactivated.	0.576392
g12334	0.439748	4.36392	sp|Q5E9Z7|RPC4_BOVIN	DNA-dependent RNA polymerase catalyzes the transcription of DNA into RNA using the four ribonucleoside triphosphates as substrates. Specific peripheric component of RNA polymerase III which synthesizes small RNAs, such as 5S rRNA and tRNAs. Plays a key role in sensing and limiting infection by intracellular bacteria and DNA viruses. Acts as nuclear and cytosolic DNA sensor involved in innate immu…	0.00284901
g12335	0.77261	11.3673	sp|Q26481|RL5_STYCL	Component of the ribosome, a large ribonucleoprotein complex responsible for the synthesis of proteins in the cell. The small ribosomal subunit (SSU) binds messenger RNAs (mRNAs) and translates the encoded message by selecting cognate aminoacyl-transfer RNA (tRNA) molecules. The large subunit (LSU) contains the ribosomal catalytic site termed the peptidyl transferase center (PTC), which catalyzes…	2.32437e-09
g12340	-0.36965	5.26887	sp|Q76JQ2|FLCN_RAT	May be a tumor suppressor (PubMed:14769940). May be involved in energy and/or nutrient sensing through the AMPK and mTOR signaling pathways. May regulate phosphorylation of RPS6KB1 (By similarity).	0.00194819
g12341	-0.228867	4.31678	sp|Q5REW9|ANR27_PONAB	May be a guanine exchange factor (GEF) for Rab21, Rab32 and Rab38 and regulate endosome dynamics. May regulate the participation of VAMP7 in membrane fusion events; in vitro inhibits VAMP7-mediated SNARE complex formation by trapping VAMP7 in a closed, fusogenically inactive conformation (By similarity). Involved in peripheral melanosomal distribution of TYRP1 in melanocytes; the function, which …	0.0978362
g12344	-0.653098	0.638467			0.0951667
g12346	0.372601	1.3284	sp|P07199|CENPB_HUMAN	Interacts with centromeric heterochromatin in chromosomes and binds to a specific 17 bp subset of alphoid satellite DNA, called the CENP-B box (PubMed:11726497). May organize arrays of centromere satellite DNA into a higher-order structure which then directs centromere formation and kinetochore assembly in mammalian chromosomes (Probable).	0.230578
g12347	0.455507	3.44138			0.0117467
g12348	-0.0553164	2.90921	sp|Q6DGN6|SPT2_DANRE	Histone chaperone that stabilizes pre-existing histone tetramers and regulates replication-independent histone exchange on chromatin. Required for normal chromatin refolding in the coding region of transcribed genes, and for the suppression of spurious transcription. Binds DNA and histones and promotes nucleosome assembly (in vitro). Facilitates formation of tetrameric histone complexes containin…	0.798008
g12350	0.0396506	1.83601	sp|Q9NBX4|RTXE_DROME		0.883177
g12354	0.43969	3.90946			0.00659785
g12355	-1.48728	6.83878			5.36694e-08
g12356	-0.112795	6.66881	sp|Q6ZQ03|FNBP4_MOUSE		0.422976
g12357	0.17723	4.60099	sp|Q9BXB5|OSB10_HUMAN	Probable lipid transporter involved in lipid countertransport between the endoplasmic reticulum and the plasma membrane. Its ability to bind phosphatidylserine, suggests that it specifically exchanges phosphatidylserine with phosphatidylinositol 4-phosphate (PI4P), delivering phosphatidylserine to the plasma membrane in exchange for PI4P (PubMed:23934110) (Probable). Plays a role in negative regu…	0.130344
g12359	2.3949	0.346773	sp|P21328|RTJK_DROME		0.00249933
g12362	-0.163364	4.59257	sp|Q9BXB4|OSB11_HUMAN	Plays a role in regulating ADIPOQ and FABP4 levels in differentiating adipocytes and is also involved in regulation of adipocyte triglyceride storage (PubMed:23028956). Weakly binds 25-hydroxycholesterol (PubMed:17428193).	0.146949
g12363	-0.200977	2.34288			0.350055
g12364	0.0763664	0.772657	sp|A2RUV0|NOTC1_XENTR	Functions as a receptor for membrane-bound ligands Jagged-1 (JAG1), Jagged-2 (JAG2) and Delta-1 (DLL1) to regulate cell-fate determination. Upon ligand activation through the released notch intracellular domain (NICD) it forms a transcriptional activator complex with RBPJ/RBPSUH and activates genes of the enhancer of split locus. Affects the implementation of differentiation, proliferation and ap…	0.831082
g12369	0.199928	4.83947	sp|Q9WUH1|TM115_MOUSE	May play a role in retrograde transport of proteins from the Golgi to the endoplasmic reticulum. May indirectly play a role in protein glycosylation in the Golgi.	0.101503
g12370	0.536086	4.30218	sp|P53356|HTK16_HYDVU	May be involved in signal transduction.	0.000332508
g12371	0.62044	2.51673	sp|Q640R7|RAP1B_XENTR	Probable GTP-binding protein that possesses GTPase activity. May play a role in endothelial cell polarity and endothelial barrier function (By similarity).	0.00121722
g12372	-0.150917	5.27414	sp|Q09930|DIRA_CAEEL	Displays low GTPase activity and exists predominantly in the GTP-bound form (By similarity). Together with epac-1, may regulate acetylcholine release at the neuromuscular junctions probably downstream of G-protein gsa-1 and adenylate cyclase acy-1 (PubMed:22897658).	0.156992
g12374	0.185257	4.26618	sp|Q01887|RYK_MOUSE	May be a coreceptor along with FZD8 of Wnt proteins, such as WNT1, WNT3, WNT3A and WNT5A. Involved in neuron differentiation, axon guidance, corpus callosum establishment and neurite outgrowth. In response to WNT3 stimulation, receptor C-terminal cleavage occurs in its transmembrane region and allows the C-terminal intracellular product to translocate from the cytoplasm to the nucleus where it pl…	0.129677
g12375	-0.00479769	2.48071	sp|Q5F2N2|FUT11_ORYLA	Probable fucosyltransferase.	0.983413
g12378	0.45896	2.883	sp|Q5F2N2|FUT11_ORYLA	Probable fucosyltransferase.	0.0159752
g12379	0.207832	2.92127	sp|P35442|TSP2_HUMAN	Adhesive glycoprotein that mediates cell-to-cell and cell-to-matrix interactions. Ligand for CD36 mediating antiangiogenic properties.	0.260344
g12380	-0.0071657	2.35941			0.977538
g12382	0.360066	1.67019	sp|D3YXG0|HMCN1_MOUSE	Promotes cleavage furrow maturation during cytokinesis in preimplantation embryos (PubMed:21215633). May play a role in the architecture of adhesive and flexible epithelial cell junctions (PubMed:17015624). May play a role during myocardial remodeling by imparting an effect on cardiac fibroblast migration (PubMed:24951538).	0.114702
g12385	-0.0518778	4.23503	sp|Q86X83|COMD2_HUMAN	May modulate activity of cullin-RING E3 ubiquitin ligase (CRL) complexes (PubMed:21778237). May down-regulate activation of NF-kappa-B (PubMed:15799966).	0.779682
g12387	-0.113426	4.13683	sp|Q6DF40|LTOR2_XENTR	Regulator of the TOR pathway, a signaling cascade that promotes cell growth in response to growth factors, energy levels, and amino acids. As part of the Ragulator complex, may activate the TOR signaling cascade in response to amino acids. Adapter protein that may regulate the MAP kinase cascade (By similarity).	0.560223
g12390	-0.301121	1.03802			0.378111
g12395	0.0258609	5.19966	sp|Q8C428|TMC7_MOUSE	Probable ion channel.	0.858121
g12396	0.836308	9.90383	sp|Q8T5Z4|RS19_BRABE		9.09598e-06
g12398	0.409296	4.10244	sp|Q6DUZ9|TSSC1_GEKJA		0.00619737
g12399	0.541072	4.85657	sp|Q921G8|GCP2_MOUSE	Gamma-tubulin complex is necessary for microtubule nucleation at the centrosome.	3.64378e-06
g1240	0.0217959	2.71766	sp|Q96RW7|HMCN1_HUMAN	Promotes cleavage furrow maturation during cytokinesis in preimplantation embryos. May play a role in the architecture of adhesive and flexible epithelial cell junctions. May play a role during myocardial remodeling by imparting an effect on cardiac fibroblast migration.	0.927469
g12400	-0.381425	0.912953			0.386648
g12401	-0.205101	4.49986			0.125707
g12402	0.77382	2.93961	sp|Q6DBR4|TIPIN_DANRE	Plays an important role in the control of DNA replication and the maintenance of replication fork stability. Important for cell survival after DNA damage or replication stress. May be required fin the replication checkpoint induced by hydroxyurea or ultraviolet light (By similarity).	8.78682e-05
g12403	0.146886	2.44816	sp|Q9QXY9|PEX3_MOUSE	Involved in peroxisome biosynthesis and integrity. Assembles membrane vesicles before the matrix proteins are translocated. As a docking factor for PEX19, is necessary for the import of peroxisomal membrane proteins in the peroxisomes.	0.597833
g12405	0.507223	2.5204	sp|A6H7C2|PEX3_BOVIN	Involved in peroxisome biosynthesis and integrity. Assembles membrane vesicles before the matrix proteins are translocated. As a docking factor for PEX19, is necessary for the import of peroxisomal membrane proteins in the peroxisomes (By similarity).	0.034919
g12406	-0.0163145	4.78376	sp|Q66PG1|LARG2_DANRE	Bifunctional glycosyltransferase with both xylosyltransferase and beta-1,3-glucuronyltransferase activities involved in the biosynthesis of the phosphorylated O-mannosyl trisaccharide (N-acetylgalactosamine-beta-3-N-acetylglucosamine-beta-4-(phosphate-6-)mannose), a carbohydrate structure present in alpha-dystroglycan (DAG1). Phosphorylated O-mannosyl trisaccharid is required for binding laminin …	0.897919
g12407	-1.92752	2.30015	sp|Q17Q91|CHCH7_BOVIN		2.47015e-06
g12409	-0.16305	3.46669	sp|Q5W5X9|TTC23_HUMAN		0.35846
g12411	-0.0260478	5.63443	sp|Q9DBQ9|SWT1_MOUSE		0.869284
g12412	-0.149469	4.77103	sp|B7ZMP1|XPP3_MOUSE	Catalyzes the removal of a penultimate prolyl residue from the N-termini of peptides, such as Leu-Pro-Ala. Also shows low activity towards peptides with Ala or Ser at the P1 position. Promotes TNFRSF1B-mediated phosphorylation of MAPK8/JNK1 and MAPK9/JNK2, suggesting a function as an adapter protein for TNFRSF1B; the effect is independent of XPNPEP3 peptidase activity. May inhibit apoptotic cell …	0.209047
g12413	-0.0839722	2.86023	sp|Q7F2E4|CSB_ORYSJ	Essential factor involved in transcription-coupled nucleotide excision repair (TCR) which allows RNA polymerase II-blocking lesions to be rapidly removed from the transcribed strand of active genes. Upon DNA-binding, it locally modifies DNA conformation by wrapping the DNA around itself, thereby modifying the interface between stalled RNA polymerase II and DNA. It is required for transcription-co…	0.675831
g12417	-0.38389	2.72497	sp|Q03468|ERCC6_HUMAN	Essential factor involved in transcription-coupled nucleotide excision repair which allows RNA polymerase II-blocking lesions to be rapidly removed from the transcribed strand of active genes. Upon DNA-binding, it locally modifies DNA conformation by wrapping the DNA around itself, thereby modifying the interface between stalled RNA polymerase II and DNA. It is required for transcription-coupled …	0.031905
g12418	0.792575	3.09149	sp|Q5R8J8|DNJB4_PONAB	Probable chaperone. Stimulates ATP hydrolysis and the folding of unfolded proteins mediated by HSPA1A/B (in vitro).	0.000608294
g12419	-1.01531	3.83299			0.006168
g12420	0.270276	2.5982	sp|Q7ZWY2|PIHD1_XENLA	Involved in the assembly of C/D box small nucleolar ribonucleoprotein (snoRNP) particles. Recruits the SWI/SNF complex to the core promoter of rRNA genes and enhances pre-rRNA transcription. Mediates interaction of TELO2 with the R2TP complex which is necessary for the stability of MTOR and SMG1. Positively regulates the assembly and activity of the mTORC1 complex.	0.169698
g12421	-0.840318	1.54214			0.011537
g12422	-0.48334	1.60999	sp|Q7ZWY2|PIHD1_XENLA	Involved in the assembly of C/D box small nucleolar ribonucleoprotein (snoRNP) particles. Recruits the SWI/SNF complex to the core promoter of rRNA genes and enhances pre-rRNA transcription. Mediates interaction of TELO2 with the R2TP complex which is necessary for the stability of MTOR and SMG1. Positively regulates the assembly and activity of the mTORC1 complex.	0.0639225
g12425	0.424621	1.48691	sp|Q8BUH1|TXN4B_MOUSE	Essential role in pre-mRNA splicing. Required in cell cycle progression for S/G(2) transition (By similarity).	0.353582
g12432	0.076711	0.782133			0.865926
g12434	3.72294	1.95094	sp|A4GTP4|ELK1_RAT	Transcription factor that binds to purine-rich DNA sequences. Forms a ternary complex with SRF and the ETS and SRF motifs of the serum response element (SRE) on the promoter region of immediate early genes such as FOS and IER2 (By similarity) (PubMed:17156131). Induces target gene transcription upon JNK-signaling pathway stimulation (PubMed:17156131).	9.02465e-12
g12437	0.215356	0.106267			0.753004
g12439	3.64976	0.277299	sp|P41969|ELK1_MOUSE	Transcription factor that binds to purine-rich DNA sequences. Forms a ternary complex with SRF and the ETS and SRF motifs of the serum response element (SRE) on the promoter region of immediate early genes such as FOS and IER2 (By similarity). Induces target gene transcription upon JNK-signaling pathway stimulation (By similarity).	3.96173e-06
g12440	3.10294	2.93478			3.55111e-09
g12441	-0.181927	1.60394			0.534102
g12447	0.747459	5.21182	sp|A4GTP4|ELK1_RAT	Transcription factor that binds to purine-rich DNA sequences. Forms a ternary complex with SRF and the ETS and SRF motifs of the serum response element (SRE) on the promoter region of immediate early genes such as FOS and IER2 (By similarity) (PubMed:17156131). Induces target gene transcription upon JNK-signaling pathway stimulation (PubMed:17156131).	4.22999e-07
g12448	-0.65237	3.08439	sp|O88879|APAF_MOUSE	Oligomeric Apaf-1 mediates the cytochrome c-dependent autocatalytic activation of pro-caspase-9 (Apaf-3), leading to the activation of caspase-3 and apoptosis. This activation requires ATP (By similarity).	0.00126966
g12449	-0.103459	2.5283			0.626533
g12453	-0.101702	4.81861	sp|O88879|APAF_MOUSE	Oligomeric Apaf-1 mediates the cytochrome c-dependent autocatalytic activation of pro-caspase-9 (Apaf-3), leading to the activation of caspase-3 and apoptosis. This activation requires ATP (By similarity).	0.406967
g12455	-4.11801	1.74077			1.5263e-07
g12458	0.959182	2.21978	sp|P0C548|PLPL2_RAT	Catalyzes the initial step in triglyceride hydrolysis in adipocyte and non-adipocyte lipid droplets. Also has acylglycerol transacylase activity. May act coordinately with LIPE/HLS within the lipolytic cascade. Regulates adiposome size and may be involved in the degradation of adiposomes. May play an important role in energy homeostasis. May play a role in the response of the organism to starvati…	2.558e-05
g12459	-0.0681374	4.23925	sp|Q16658|FSCN1_HUMAN	Actin-binding protein that contains 2 major actin binding sites (PubMed:21685497, PubMed:23184945). Organizes filamentous actin into parallel bundles (PubMed:20393565, PubMed:21685497, PubMed:23184945). Plays a role in the organization of actin filament bundles and the formation of microspikes, membrane ruffles, and stress fibers (PubMed:22155786). Important for the formation of a diverse set of …	0.620369
g12460	0.317917	3.5573	sp|P97292|HRH2_MOUSE	The H2 subclass of histamine receptors mediates gastric acid secretion. The activity of this receptor is mediated by G proteins which activate adenylyl cyclase.	0.10076
g12461	0.475168	7.78048	sp|O18405|SURF4_DROME		1.72315e-06
g12462	1.23181	9.51056	sp|P08935|CYT_BITAR	Inhibits various C1 cysteine proteases including cathepsin L, papain and cathepsin B. This protein has no toxic activity and its function in the venom is unknown. It may play a role as housekeeping or regulatory protein (By similarity).	4.77219e-08
g12463	-1.96008	5.69476			1.49298e-10
g12464	0.124983	1.06392	sp|Q9VBP3|TNKS_DROME	Stimulates proteasome activity, probably by ADP-ribosylation of PI31 (PubMed:23622245). Modulates 26S proteasome assembly (PubMed:23622245).	0.765163
g12465	0.255003	9.56852	sp|Q1LZB6|CAPR1_BOVIN	May regulate the transport and translation of mRNAs of proteins involved in synaptic plasticity in neurons and cell proliferation and migration in multiple cell types. Binds directly and selectively to MYC and CCND2 RNAs. In neuronal cells, directly binds to several mRNAs associated with RNA granules, including BDNF, CAMK2A, CREB1, MAP2, NTRK2 mRNAs, as well as to GRIN1 and KPNB1 mRNAs, but not t…	0.00599918
g12466	0.818109	4.12948	sp|P54825|LMIP_RAT	Present in the thicker 16-17 nm junctions of mammalian lens fiber cells, where it may contribute to cell junctional organization. Acts as a receptor for calmodulin. May play an important role in both lens development and cataractogenesis.	9.20493e-05
g12468	-0.614208	5.91724	sp|Q5SRE5|NU188_HUMAN	May function as a component of the nuclear pore complex (NPC).	3.07359e-06
g12469	0.0726949	6.2987			0.702042
g12470	-4.17714	2.46927			1.43799e-08
g12471	0.817194	7.36312			1.52024e-08
g12474	0.288655	2.30017			0.304745
g12475	0.1435	6.94116	sp|Q60HG7|CGL_MACFA	Catalyzes the last step in the trans-sulfuration pathway from methionine to cysteine. Has broad substrate specificity. Converts cystathionine to cysteine, ammonia and 2-oxobutanoate. Converts two cysteine molecules to lanthionine and hydrogen sulfide. Can also accept homocysteine as substrate. Specificity depends on the levels of the endogenous substrates. Generates the endogenous signaling molec…	0.20595
g12478	1.61488	0.420254	sp|Q9CYL5|GAPR1_MOUSE		0.000347565
g12479	0.168939	2.62269	sp|Q9SWW5|PCS1_WHEAT	Involved in the synthesis of phytochelatins (PC) and homophytochelatins (hPC), the heavy-metal-binding peptides of plants.	0.420601
g12487	-0.764431	1.13183			0.0344079
g12492	-3.76334	2.26797			2.26741e-12
g12494	-0.221939	0.836251			0.638284
g12495	0.13007	2.5728	sp|P10394|POL4_DROME		0.553516
g12499	0.12513	2.32347	sp|P42674|BP10_PARLI	Could be involved in the differentiation of ectodermal lineages and subsequent patterning of the embryo.	0.566984
g12506	0.0441263	3.16372	sp|P55115|NAS15_CAEEL	Metalloprotease.	0.800123
g12509	0.0363746	1.89008	sp|Q8N0Z3|SPICE_HUMAN	Regulator required for centriole duplication, for proper bipolar spindle formation and chromosome congression in mitosis.	0.890859
g12510	-0.0509297	2.84523	sp|Q16739|CEGT_HUMAN	Catalyzes at the cytosolic surface of the Golgi, the initial step of the glucosylceramide-based glycosphingolipid/GSL synthetic pathway, the transfer of glucose from UDP-glucose to ceramide to produce glucosylceramide/GlcCer (PubMed:8643456, PubMed:1532799). Glucosylceramide is the core component of glycosphingolipids/GSLs, amphipathic molecules consisting of a ceramide lipid moiety embedded in t…	0.824995
g12516	-1.05878	2.46254	sp|Q32P44|EMAL3_HUMAN	May modify the assembly dynamics of microtubules, such that microtubules are slightly longer, but more dynamic.	6.66357e-05
g12517	-0.449631	3.47338			0.0379185
g12518	0.111084	5.19632	sp|Q5PQ71|ISOC2_XENLA		0.276739
g12522	0.793368	7.40135	sp|P52819|RL22_CAEEL		0.00509443
g12523	0.348873	3.81227	sp|Q9QYK7|RNF11_MOUSE	Essential component of a ubiquitin-editing protein complex, comprising also TNFAIP3, ITCH and TAX1BP1, that ensures the transient nature of inflammatory signaling pathways. Promotes the association of TNFAIP3 to RIPK1 after TNF stimulation. TNFAIP3 deubiquitinates 'Lys-63' polyubiquitin chains on RIPK1 and catalyzes the formation of 'Lys-48'-polyubiquitin chains. This leads to RIPK1 proteasomal d…	0.0336348
g12524	0.556569	5.47031	sp|O08795|GLU2B_MOUSE	Regulatory subunit of glucosidase II that cleaves sequentially the 2 innermost alpha-1,3-linked glucose residues from the Glc(2)Man(9)GlcNAc(2) oligosaccharide precursor of immature glycoproteins (PubMed:27462106, PubMed:9148925). Required for efficient PKD1/Polycystin-1 biogenesis and trafficking to the plasma membrane of the primary cilia (PubMed:21685914).	3.14347e-05
g12526	0.541613	6.82641	sp|P14314|GLU2B_HUMAN	Regulatory subunit of glucosidase II that cleaves sequentially the 2 innermost alpha-1,3-linked glucose residues from the Glc(2)Man(9)GlcNAc(2) oligosaccharide precursor of immature glycoproteins (PubMed:10929008). Required for efficient PKD1/Polycystin-1 biogenesis and trafficking to the plasma membrane of the primary cilia (By similarity).	6.01431e-07
g12529	-0.0524574	5.80325	sp|Q2KHZ9|GCDH_BOVIN	Catalyzes the oxidative decarboxylation of glutaryl-CoA to crotonyl-CoA and CO(2) in the degradative pathway of L-lysine, L-hydroxylysine, and L-tryptophan metabolism. It uses electron transfer flavoprotein as its electron acceptor (By similarity).	0.573644
g1253	3.5753	2.39119			3.20991e-10
g12532	-0.203354	7.11707	sp|Q9UBC2|EP15R_HUMAN	Seems to be a constitutive component of clathrin-coated pits that is required for receptor-mediated endocytosis. Involved in endocytosis of integrin beta-1 (ITGB1) and transferrin receptor (TFR); internalization of ITGB1 as DAB2-dependent cargo but not TFR seems to require association with DAB2.	0.0157112
g12533	0.614993	3.28305	sp|Q9WTP7|KAD3_MOUSE	Involved in maintaining the homeostasis of cellular nucleotides by catalyzing the interconversion of nucleoside phosphates. Has GTP:AMP phosphotransferase and ITP:AMP phosphotransferase activities.	0.000269275
g12535	0.213685	3.64754	sp|Q8IY84|NIM1_HUMAN		0.191327
g12537	0.0996812	3.55439	sp|Q6NRD0|A13CA_XENLA	Acts as a molecular chaperone for G protein-coupled receptors, regulating their biogenesis and exit from the ER.	0.513759
g12538	-0.165945	2.69558	sp|Q96K19|RN170_HUMAN	E3 ubiquitin-protein ligase that plays an essential role in stimulus-induced inositol 1,4,5-trisphosphate receptor type 1 (ITPR1) ubiquitination and degradation via the endoplasmic reticulum-associated degradation (ERAD) pathway. Also involved in ITPR1 turnover in resting cells.	0.42967
g1254	0.920495	0.000253122			0.191731
g12540	0.0936826	1.6808			0.824525
g12541	-0.314551	6.15064			0.00493688
g12542	-1.38416	1.40336			2.07912e-05
g12543	0.0024508	6.30965	sp|Q4R4T9|RANB3_MACFA	Acts as a cofactor for XPO1/CRM1-mediated nuclear export, perhaps as export complex scaffolding protein. Bound to XPO1/CRM1, stabilizes the XPO1/CRM1-cargo interaction. In the absence of Ran-bound GTP prevents binding of XPO1/CRM1 to the nuclear pore complex. Binds to CHC1/RCC1 and increases the guanine nucleotide exchange activity of CHC1/RCC1. Recruits XPO1/CRM1 to CHC1/RCC1 in a Ran-dependent …	0.981405
g12544	-0.185585	5.52056	sp|P53395|ODB2_MOUSE	The branched-chain alpha-keto dehydrogenase complex catalyzes the overall conversion of alpha-keto acids to acyl-CoA and CO(2). It contains multiple copies of three enzymatic components: branched-chain alpha-keto acid decarboxylase (E1), lipoamide acyltransferase (E2) and lipoamide dehydrogenase (E3). Within this complex, the catalytic function of this enzyme is to accept, and to transfer to coen…	0.0569885
g12545	-2.18142	3.43131	sp|Q23571|ODB2_CAEEL	The branched-chain alpha-keto dehydrogenase complex catalyzes the overall conversion of alpha-keto acids to acyl-CoA and CO(2) (By similarity). It contains multiple copies of three enzymatic components: branched-chain alpha-keto acid decarboxylase (E1), lipoamide acyltransferase (E2) and lipoamide dehydrogenase (E3) (By similarity). Within this complex, the catalytic function of this enzyme is to…	1.02781e-06
g12546	0.304447	4.61828	sp|Q5F3Z7|CTSL2_CHICK	Probable phosphatase.	0.0206228
g12549	-0.726984	5.87074	sp|Q96MU7|YTDC1_HUMAN	Regulator of alternative splicing that specifically recognizes and binds N6-methyladenosine (m6A)-containing RNAs (PubMed:26318451, PubMed:26876937, PubMed:25242552, PubMed:28984244). M6A is a modification present at internal sites of mRNAs and some non-coding RNAs and plays a role in the efficiency of mRNA splicing, processing and stability (PubMed:26318451, PubMed:25242552). Acts as a key regul…	3.49957e-07
[truncated: 13,702 more rows]

## Sheet: F12vF8
ID	log2FC	log2CPM	SwissProt Hit ID	SwissProt Hit Description	False Discovery Rate
g1000	0.270119	0.782966	sp|P21329|RTJK_DROFU		0.502657
[truncated: 14,914 more rows]

## Sheet: F12vFi12c0
ID	log2FC	log2CPM	SwissProt Hit ID	SwissProt Hit Description	False Discovery Rate
g1000	0.461255	0.854244	sp|P21329|RTJK_DROFU		0.513877
[truncated: 15,268 more rows]

## Sheet: F3vF0
ID	log2FC	log2CPM	SwissProt Hit ID	SwissProt Hit Description	False Discovery Rate
[truncated: 14,915 more rows]

[truncated: 29 more sheets: F8vF0, F8vF3, F8vFi8c0, Fi12vFi0, Fi8vFi0, H0vF0, H12vF12, H12vH0, H12vH8, H12vHi12c0, H3vF3, H3vH0, H8vF8, H8vH0, H8vH3, H8vHi8c0, Hi0vFi0, Hi12vFi12, Hi12vFi12c0, Hi12vFi12c8 …]
