# Supplementary material for: Generic injuries are sufficient to induce ectopic Wnt organizers in Hydra
Source: eLife. 2021 Mar 29;10:e60562. doi: 10.7554/eLife.60562 (PMC8049744; doi:10.7554/eLife.60562)
Supplement: Supplementary file 3. — Excel workbook containing the full results tables generated by HOMER and chromVAR. The HOMER results contain transcription factor binding motif (TFBM) enrichment statistics for peaks that show an increase in accessibility from 0 to 3 hr post amputation (hpa) relative to peaks that did not show an increase in accessibility from 0 to 3 hpa. The chromVAR results contain the variability scores for all TFBMs considered in the analysis. [file elife-60562-supp3.xlsx]

## Sheet: 3hpa HOMER Enrichment
Motif Name	Consensus	P-value	Log P-value	q-value (Benjamini)	# of Target Sequences with Motif(of 2183)	% of Target Sequences with Motif	# of Background Sequences with Motif(of 32333)	% of Background Sequences with Motif
Atf1(bZIP)/K562-ATF1-ChIP-Seq(GSE31477)/Homer	GATGACGTCA	1e-76	-176.1	0	1305	0.5978	12942.9	0.4003
Atf7(bZIP)/3T3L1-Atf7-ChIP-Seq(GSE56872)/Homer	NGRTGACGTCAY	1e-54	-126	0	792	0.3628	6979.9	0.2159
Atf2(bZIP)/3T3L1-Atf2-ChIP-Seq(GSE56872)/Homer	NRRTGACGTCAT	1e-46	-107.6	0	567	0.2597	4584.7	0.1418
c-Jun-CRE(bZIP)/K562-cJun-ChIP-Seq(GSE31477)/Homer	ATGACGTCATCY	1e-31	-71.8	0	425	0.1947	3526.6	0.1091
JunD(bZIP)/K562-JunD-ChIP-Seq/Homer	ATGACGTCATCN	1e-18	-41.51	0	187	0.0857	1379.9	0.0427
CRE(bZIP)/Promoter/Homer	CSGTGACGTCAC	1e-15	-36.63	0	294	0.1347	2661.4	0.0823
Atf4(bZIP)/MEF-Atf4-ChIP-Seq(GSE35681)/Homer	MTGATGCAAT	1e-15	-35.25	0	675	0.3092	7562.1	0.2339
Chop(bZIP)/MEF-Chop-ChIP-Seq(GSE35681)/Homer	ATTGCATCAT	1e-12	-29.07	0	482	0.2208	5211	0.1612
ETS1(ETS)/Jurkat-ETS1-ChIP-Seq(GSE17954)/Homer	ACAGGAAGTG	1e-07	-16.49	0	401	0.1837	4612.9	0.1427
Atf3(bZIP)/GBM-ATF3-ChIP-Seq(GSE33912)/Homer	DATGASTCATHN	1e-06	-16	0	503	0.2304	6011.7	0.1859
Elk4(ETS)/Hela-Elk4-ChIP-Seq(GSE31477)/Homer	NRYTTCCGGY	1e-06	-15.59	0	478	0.219	5691	0.176
AP-1(bZIP)/ThioMac-PU.1-ChIP-Seq(GSE21512)/Homer	VTGACTCATC	1e-06	-14.92	0	502	0.23	6051.3	0.1872
Mef2d(MADS)/Retina-Mef2d-ChIP-Seq(GSE61391)/Homer	GCTATTTTTAGC	1e-06	-14.68	0	639	0.2927	7961.1	0.2462
Hoxb4(Homeobox)/ES-Hoxb4-ChIP-Seq(GSE34014)/Homer	TGATTRATGGCY	1e-05	-13.76	0	315	0.1443	3588.5	0.111
ERG(ETS)/VCaP-ERG-ChIP-Seq(GSE14097)/Homer	ACAGGAAGTG	1e-05	-13.75	0	515	0.2359	6291.3	0.1946
Fra1(bZIP)/BT549-Fra1-ChIP-Seq(GSE46166)/Homer	NNATGASTCATH	1e-05	-13.69	0	484	0.2217	5868.3	0.1815
BATF(bZIP)/Th17-BATF-ChIP-Seq(GSE39756)/Homer	DATGASTCAT	1e-05	-13.33	0	524	0.24	6438.2	0.1991
GABPA(ETS)/Jurkat-GABPa-ChIP-Seq(GSE17954)/Homer	RACCGGAAGT	1e-05	-12.46	0.0001	370	0.1695	4381.6	0.1355
Mef2c(MADS)/GM12878-Mef2c-ChIP-Seq(GSE32465)/Homer	DCYAAAAATAGM	1e-05	-11.98	0.0001	1273	0.5831	17344.1	0.5364
EWS:FLI1-fusion(ETS)/SK_N_MC-EWS:FLI1-ChIP-Seq(SRA014231)/Homer	VACAGGAAAT	1e-05	-11.68	0.0001	251	0.115	2834.6	0.0877
Fra2(bZIP)/Striatum-Fra2-ChIP-Seq(GSE43429)/Homer	GGATGACTCATC	0.0001	-11.23	0.0002	318	0.1457	3742.3	0.1157
ETV1(ETS)/GIST48-ETV1-ChIP-Seq(GSE22441)/Homer	AACCGGAAGT	0.0001	-10.64	0.0004	529	0.2423	6668.1	0.2062
EHF(ETS)/LoVo-EHF-ChIP-Seq(GSE49402)/Homer	AVCAGGAAGT	0.0001	-10.44	0.0004	625	0.2863	8030.7	0.2484
Mef2a(MADS)/HL1-Mef2a.biotin-ChIP-Seq(GSE21529)/Homer	CYAAAAATAG	0.0001	-10.31	0.0005	899	0.4118	11967.6	0.3701
Fli1(ETS)/CD8-FLI-ChIP-Seq(GSE20898)/Homer	NRYTTCCGGH	0.0001	-10.25	0.0005	598	0.2739	7662	0.237
Tgif1(Homeobox)/mES-Tgif1-ChIP-Seq(GSE55404)/Homer	YTGWCADY	0.0001	-9.877	0.0007	1675	0.7673	23626.8	0.7307
Pdx1(Homeobox)/Islet-Pdx1-ChIP-Seq(SRA008281)/Homer	YCATYAATCA	0.0001	-9.802	0.0007	1419	0.65	19714	0.6097
PU.1(ETS)/ThioMac-PU.1-ChIP-Seq(GSE21512)/Homer	AGAGGAAGTG	0.0001	-9.714	0.0007	164	0.0751	1785.4	0.0552
HOXA2(Homeobox)/mES-Hoxa2-ChIP-Seq(Donaldson_et_al.)/Homer	GYCATCMATCAT	0.0001	-9.693	0.0007	168	0.077	1837.7	0.0568
CEBP:AP1(bZIP)/ThioMac-CEBPb-ChIP-Seq(GSE21512)/Homer	DRTGTTGCAA	0.001	-8.902	0.0015	1131	0.5181	15485.6	0.4789
Etv2(ETS)/ES-ER71-ChIP-Seq(GSE59402)/Homer(0.967)	NNAYTTCCTGHN	0.001	-8.851	0.0015	311	0.1425	3772	0.1167
Tgif2(Homeobox)/mES-Tgif2-ChIP-Seq(GSE55404)/Homer	TGTCANYT	0.001	-8.729	0.0017	1658	0.7595	23453.1	0.7253
Fosl2(bZIP)/3T3L1-Fosl2-ChIP-Seq(GSE56872)/Homer	NATGASTCABNN	0.001	-8.419	0.0022	166	0.076	1861.8	0.0576
Mef2b(MADS)/HEK293-Mef2b.V5-ChIP-Seq(GSE67450)/Homer	GCTATTTTTGGM	0.001	-7.89	0.0037	1455	0.6665	20425	0.6317
Elk1(ETS)/Hela-Elk1-ChIP-Seq(GSE31477)/Homer	HACTTCCGGY	0.001	-7.799	0.0039	347	0.159	4326.2	0.1338
Srebp1a(bHLH)/HepG2-Srebp1a-ChIP-Seq(GSE31477)/Homer	RTCACSCCAY	0.001	-7.554	0.0048	75	0.0344	742.3	0.023
EWS:ERG-fusion(ETS)/CADO_ES1-EWS:ERG-ChIP-Seq(SRA014231)/Homer	ATTTCCTGTN	0.001	-7.36	0.0057	385	0.1764	4881.5	0.151
Jun-AP1(bZIP)/K562-cJun-ChIP-Seq(GSE31477)/Homer	GATGASTCATCN	0.01	-6.846	0.0093	95	0.0435	1011.5	0.0313
Cux2(Homeobox)/Liver-Cux2-ChIP-Seq(GSE35985)/Homer	HNRAATCAAT	0.01	-6.809	0.0094	1113	0.5098	15419.5	0.4769
Tcf4(HMG)/Hct116-Tcf4-ChIP-Seq(SRA012054)/Homer	ASATCAAAGGVA	0.01	-6.519	0.0122	513	0.235	6744.3	0.2086
ELF5(ETS)/T47D-ELF5-ChIP-Seq(GSE30407)/Homer	ACVAGGAAGT	0.01	-6.504	0.0122	440	0.2016	5714.9	0.1767
MafF(bZIP)/HepG2-MafF-ChIP-Seq(GSE31477)/Homer	HWWGTCAGCAWWTTT	0.01	-6.48	0.0122	527	0.2414	6946.9	0.2149
Reverb(NR),DR2/RAW-Reverba.biotin-ChIP-Seq(GSE45914)/Homer	GTRGGTCASTGGGTCA	0.01	-6.417	0.0126	28	0.0128	222.1	0.0069
Olig2(bHLH)/Neuron-Olig2-ChIP-Seq(GSE30882)/Homer	RCCATMTGTT	0.01	-6.412	0.0126	1017	0.4659	14045.5	0.4344
SPDEF(ETS)/VCaP-SPDEF-ChIP-Seq(SRA014231)/Homer	ASWTCCTGBT	0.01	-6.066	0.0171	407	0.1864	5285.9	0.1635
Lhx2(Homeobox)/HFSC-Lhx2-ChIP-Seq(GSE48068)/Homer	TAATTAGN	0.01	-5.989	0.0181	1733	0.7939	24851.3	0.7686
CEBP(bZIP)/ThioMac-CEBPb-ChIP-Seq(GSE21512)/Homer	ATTGCGCAAC	0.01	-5.501	0.0288	1332	0.6102	18821.6	0.5821
ETS(ETS)/Promoter/Homer	AACCGGAAGT	0.01	-5.424	0.0305	161	0.0738	1935	0.0598
Ets1-distal(ETS)/CD4+-PolII-ChIP-Seq(Barski_et_al.)/Homer	MACAGGAAGT	0.01	-5.375	0.0314	114	0.0522	1313.1	0.0406
ZNF711(Zf)/SHSY5Y-ZNF711-ChIP-Seq(GSE20673)/Homer	AGGCCTAG	0.01	-5.2	0.0366	278	0.1273	3550.8	0.1098
EBF1(EBF)/Near-E2A-ChIP-Seq(GSE21512)/Homer	GTCCCCWGGGGA	0.01	-5.184	0.0366	75	0.0344	816.7	0.0253
Lhx3(Homeobox)/Neuron-Lhx3-ChIP-Seq(GSE31456)/Homer	ADBTAATTAR	0.01	-5.139	0.0375	2007	0.9194	29215.8	0.9036
HIF-1a(bHLH)/MCF7-HIF1a-ChIP-Seq(GSE28352)/Homer	TACGTGCV	0.01	-5.127	0.0375	282	0.1292	3611.6	0.1117
Arnt:Ahr(bHLH)/MCF7-Arnt-ChIP-Seq(Lo_et_al.)/Homer	TBGCACGCAA	0.01	-5.073	0.0385	601	0.2753	8138.3	0.2517
GATA3(Zf),DR8/iTreg-Gata3-ChIP-Seq(GSE20898)/Homer	AGATSTNDNNDSAGATAASN	0.01	-4.973	0.0418	127	0.0582	1504.4	0.0465
Lhx1(Homeobox)/EmbryoCarcinoma-Lhx1-ChIP-Seq(GSE70957)/Homer	NNYTAATTAR	0.01	-4.871	0.0455	1868	0.8557	27048.4	0.8365
Foxh1(Forkhead)/hESC-FOXH1-ChIP-Seq(GSE29422)/Homer	NNTGTGGATTSS	0.01	-4.845	0.0458	778	0.3564	10725.6	0.3317
Meis1(Homeobox)/MastCells-Meis1-ChIP-Seq(GSE48085)/Homer	VGCTGWCAVB	0.01	-4.727	0.0507	629	0.2881	8579.3	0.2653
HNF6(Homeobox)/Liver-Hnf6-ChIP-Seq(ERP000394)/Homer	NTATYGATCH	0.01	-4.71	0.0507	1217	0.5575	17202.6	0.532
Isl1(Homeobox)/Neuron-Isl1-ChIP-Seq(GSE31456)/Homer	CTAATKGV	0.01	-4.676	0.0515	1777	0.814	25660.6	0.7936
KLF14(Zf)/HEK293-KLF14.GFP-ChIP-Seq(GSE58341)/Homer	RGKGGGCGKGGC	0.01	-4.644	0.0523	258	0.1182	3314	0.1025
MITF(bHLH)/MastCells-MITF-ChIP-Seq(GSE48085)/Homer	RTCATGTGAC	0.1	-4.585	0.0546	486	0.2226	6540.9	0.2023
Pax7(Paired,Homeobox),longest/Myoblast-Pax7-ChIP-Seq(GSE25064)/Homer	NTAATTDGCYAATTANNWWD	0.1	-4.485	0.0594	250	0.1145	3215.8	0.0995
Maz(Zf)/HepG2-Maz-ChIP-Seq(GSE31477)/Homer	GGGGGGGG	0.1	-4.237	0.075	270	0.1237	3514.5	0.1087
AMYB(HTH)/Testes-AMYB-ChIP-Seq(GSE44588)/Homer	TGGCAGTTGG	0.1	-4.231	0.075	1219	0.5584	17295	0.5349
Gata2(Zf)/K562-GATA2-ChIP-Seq(GSE18829)/Homer	BBCTTATCTS	0.1	-4.214	0.075	819	0.3752	11401.1	0.3526
Atoh1(bHLH)/Cerebellum-Atoh1-ChIP-Seq(GSE22111)/Homer	VNRVCAGCTGGY	0.1	-4.182	0.0756	349	0.1599	4631.6	0.1432
Sox2(HMG)/mES-Sox2-ChIP-Seq(GSE11431)/Homer	BCCATTGTTC	0.1	-4.127	0.0788	910	0.4169	12745.3	0.3942
Gata1(Zf)/K562-GATA1-ChIP-Seq(GSE18829)/Homer	SAGATAAGRV	0.1	-4.106	0.0793	711	0.3257	9841.9	0.3044
Srebp2(bHLH)/HepG2-Srebp2-ChIP-Seq(GSE31477)/Homer	CGGTCACSCCAC	0.1	-3.986	0.0881	37	0.0169	378.5	0.0117
SpiB(ETS)/OCILY3-SPIB-ChIP-Seq(GSE56857)/Homer	AAAGRGGAAGTG	0.1	-3.983	0.0881	109	0.0499	1315.7	0.0407
Sox6(HMG)/Myotubes-Sox6-ChIP-Seq(GSE32627)/Homer	CCATTGTTNY	0.1	-3.971	0.0881	1604	0.7348	23104.3	0.7146
Unknown(Homeobox)/Limb-p300-ChIP-Seq/Homer	SSCMATWAAA	0.1	-3.893	0.0927	1406	0.6441	20133.5	0.6227
Tlx?(NR)/NPC-H3K4me1-ChIP-Seq(GSE16256)/Homer	CTGGCAGSCTGCCA	0.1	-3.875	0.0931	43	0.0197	456.5	0.0141
Pax7(Paired,Homeobox)/Myoblast-Pax7-ChIP-Seq(GSE25064)/Homer	TAATCAATTA	0.1	-3.803	0.0987	521	0.2387	7129.3	0.2205
Egr1(Zf)/K562-Egr1-ChIP-Seq(GSE32465)/Homer	TGCGTGGGYG	0.1	-3.784	0.0993	107	0.049	1299.7	0.0402
Bach2(bZIP)/OCILy7-Bach2-ChIP-Seq(GSE44420)/Homer	TGCTGAGTCA	0.1	-3.751	0.1013	80	0.0366	940.9	0.0291
TATA-Box(TBP)/Promoter/Homer	CCTTTTAWAGSC	0.1	-3.716	0.1036	1561	0.7151	22488.7	0.6955
HIF-1b(HLH)/T47D-HIF1b-ChIP-Seq(GSE59937)/Homer	RTACGTGC	0.1	-3.559	0.1196	940	0.4306	13266.9	0.4103
ELF1(ETS)/Jurkat-ELF1-ChIP-Seq(SRA014231)/Homer	AVCCGGAAGT	0.1	-3.49	0.1266	223	0.1022	2919.8	0.0903
KLF5(Zf)/LoVo-KLF5-ChIP-Seq(GSE49402)/Homer	DGGGYGKGGC	0.1	-3.487	0.1266	155	0.071	1973.6	0.061
AP-2gamma(AP2)/MCF7-TFAP2C-ChIP-Seq(GSE21234)/Homer	SCCTSAGGSCAW	0.1	-3.486	0.1266	107	0.049	1316.4	0.0407
p53(p53)/mES-cMyc-ChIP-Seq(GSE11431)/Homer	ACATGCCCGGGCAT	0.1	-3.468	0.1266	3	0.0014	10.7	0.0003
Tbet(T-box)/CD8-Tbet-ChIP-Seq(GSE33802)/Homer	AGGTGTGAAM	0.1	-3.461	0.1266	850	0.3894	11959.8	0.3699
ZNF675(Zf)/HEK293-ZNF675.GFP-ChIP-Seq(GSE58341)/Homer	ARGAGGMCAAAATGW	0.1	-3.335	0.1391	86	0.0394	1042	0.0322
Tbx5(T-box)/HL1-Tbx5.biotin-ChIP-Seq(GSE21529)/Homer	AGGTGTCA	0.1	-3.33	0.1391	1182	0.5415	16877.7	0.522
Gata4(Zf)/Heart-Gata4-ChIP-Seq(GSE35151)/Homer	NBWGATAAGR	0.1	-3.22	0.1525	1284	0.5882	18411.4	0.5694
Stat3(Stat)/mES-Stat3-ChIP-Seq(GSE11431)/Homer	CTTCCGGGAA	0.1	-3.173	0.158	197	0.0902	2582.2	0.0799
NeuroD1(bHLH)/Islet-NeuroD1-ChIP-Seq(GSE30298)/Homer	GCCATCTGTT	0.1	-3.088	0.1701	248	0.1136	3308.6	0.1023
Gfi1b(Zf)/HPC7-Gfi1b-ChIP-Seq(GSE22178)/Homer	MAATCACTGC	0.1	-3.022	0.1796	366	0.1677	4997	0.1545
Gata6(Zf)/HUG1N-GATA6-ChIP-Seq(GSE51936)/Homer	YCTTATCTBN	0.1	-3.015	0.1796	1268	0.5809	18206.9	0.5631
GATA(Zf),IR4/iTreg-Gata3-ChIP-Seq(GSE20898)/Homer	NAGATWNBNATCTNN	0.1	-2.991	0.1813	147	0.0673	1899.4	0.0587
Sox3(HMG)/NPC-Sox3-ChIP-Seq(GSE33059)/Homer	CCWTTGTY	0.1	-2.96	0.1849	1398	0.6404	20154.6	0.6233
Tcf3(HMG)/mES-Tcf3-ChIP-Seq(GSE11724)/Homer	ASWTCAAAGG	0.1	-2.954	0.1849	290	0.1328	3918.8	0.1212
PRDM14(Zf)/H1-PRDM14-ChIP-Seq(GSE22767)/Homer	RGGTCTCTAACY	0.1	-2.879	0.1963	168	0.077	2201.3	0.0681
RUNX-AML(Runt)/CD4+-PolII-ChIP-Seq(Barski_et_al.)/Homer	GCTGTGGTTW	0.1	-2.807	0.2089	348	0.1594	4764.1	0.1473
HOXA9(Homeobox)/HSC-Hoxa9-ChIP-Seq(GSE33509)/Homer	GGCCATAAATCA	0.1	-2.757	0.2172	1216	0.557	17478	0.5406
ZNF16(Zf)/HEK293-ZNF16.GFP-ChIP-Seq(GSE58341)/Homer	MACCTTCYATGGCTCCCTAKTGCCY	0.1	-2.729	0.2212	1	0.0005	1.3	0
ETS:E-box(ETS,bHLH)/HPC7-Scl-ChIP-Seq(GSE22178)/Homer	AGGAARCAGCTG	0.1	-2.678	0.2303	23	0.0105	242.7	0.0075
MYB(HTH)/ERMYB-Myb-ChIPSeq(GSE22095)/Homer	GGCVGTTR	0.1	-2.618	0.2422	1510	0.6917	21888.6	0.677
STAT4(Stat)/CD4-Stat4-ChIP-Seq(GSE22104)/Homer	NYTTCCWGGAAR	0.1	-2.613	0.2422	798	0.3656	11333	0.3505
RXR(NR),DR1/3T3L1-RXR-ChIP-Seq(GSE13511)/Homer	TAGGGCAAAGGTCA	0.1	-2.589	0.2445	226	0.1035	3047.4	0.0942
Ap4(bHLH)/AML-Tfap4-ChIP-Seq(GSE45738)/Homer	NAHCAGCTGD	0.1	-2.587	0.2445	341	0.1562	4691.7	0.1451
STAT5(Stat)/mCD4+-Stat5-ChIP-Seq(GSE12346)/Homer	RTTTCTNAGAAA	0.1	-2.545	0.2504	245	0.1122	3322.2	0.1027
PRDM1(Zf)/Hela-PRDM1-ChIP-Seq(GSE31477)/Homer	ACTTTCACTTTC	0.1	-2.406	0.2851	463	0.2121	6478.9	0.2004
NFAT:AP1(RHD,bZIP)/Jurkat-NFATC1-ChIP-Seq(Jolma_et_al.)/Homer	SARTGGAAAAWRTGAGTCAB	0.1	-2.394	0.2857	133	0.0609	1752.3	0.0542
Usf2(bHLH)/C2C12-Usf2-ChIP-Seq(GSE36030)/Homer	GTCACGTGGT	0.1	-2.354	0.2948	249	0.1141	3401.4	0.1052
Nr5a2(NR)/Pancreas-LRH1-ChIP-Seq(GSE34295)/Homer	BTCAAGGTCA	0.1	-2.337	0.297	199	0.0912	2690.1	0.0832
PPARE(NR),DR1/3T3L1-Pparg-ChIP-Seq(GSE13511)/Homer	TGACCTTTGCCCCA	1	-2.281	0.3112	230	0.1054	3138.7	0.0971
GFY-Staf(?,Zf)/Promoter/Homer	RACTACAATTCCCAGAAKGC	1	-2.259	0.3151	12	0.0055	117.6	0.0036
Rbpj1(?)/Panc1-Rbpj1-ChIP-Seq(GSE47459)/Homer	HTTTCCCASG	1	-2.257	0.3151	449	0.2057	6298.7	0.1948
KLF3(Zf)/MEF-Klf3-ChIP-Seq(GSE44748)/Homer	NRGCCCCRCCCHBNN	1	-2.256	0.3151	45	0.0206	546.8	0.0169
RAR:RXR(NR),DR5/ES-RAR-ChIP-Seq(GSE56893)/Homer	AGGTCAAGGTCA	1	-2.214	0.321	30	0.0137	348	0.0108
Myf5(bHLH)/GM-Myf5-ChIP-Seq(GSE24852)/Homer	BAACAGCTGT	1	-2.184	0.328	188	0.0861	2551	0.0789
Brachyury(T-box)/Mesoendoderm-Brachyury-ChIP-exo(GSE54963)/Homer	ANTTMRCASBNNNGTGYKAAN	1	-2.167	0.3307	244	0.1118	3352.7	0.1037
PRDM9(Zf)/Testis-DMC1-ChIP-Seq(GSE35498)/Homer	ADGGYAGYAGCATCT	1	-2.134	0.3387	153	0.0701	2058.9	0.0637
ZFX(Zf)/mES-Zfx-ChIP-Seq(GSE11431)/Homer	AGGCCTRG	1	-2.131	0.3387	172	0.0788	2328.7	0.072
Sox9(HMG)/Limb-SOX9-ChIP-Seq(GSE73225)/Homer	AGGVNCCTTTGT	1	-2.111	0.3407	588	0.2694	8347.5	0.2582
Stat3+il21(Stat)/CD4-Stat3-ChIP-Seq(GSE19198)/Homer	SVYTTCCNGGAARB	1	-2.111	0.3407	341	0.1562	4756.8	0.1471
ZNF165(Zf)/WHIM12-ZNF165-ChIP-Seq(GSE65937)/Homer	AAGGKGRCGCAGGCA	1	-2.075	0.3475	11	0.005	109.9	0.0034
CArG(MADS)/PUER-Srf-ChIP-Seq(Sullivan_et_al.)/Homer	CCATATATGGNM	1	-2.064	0.3481	266	0.1219	3681.4	0.1139
BMYB(HTH)/Hela-BMYB-ChIP-Seq(GSE27030)/Homer	NHAACBGYYV	1	-2.05	0.3503	1464	0.6706	21305.2	0.6589
Oct2(POU,Homeobox)/Bcell-Oct2-ChIP-Seq(GSE21512)/Homer	ATATGCAAAT	1	-2.04	0.3508	682	0.3124	9736.7	0.3011
IRF1(IRF)/PBMC-IRF1-ChIP-Seq(GSE43036)/Homer	GAAAGTGAAAGT	1	-2.032	0.3511	156	0.0715	2111.7	0.0653
DMRT1(DM)/Testis-DMRT1-ChIP-Seq(GSE64892)/Homer	TWGHWACAWTGTWDC	1	-2.031	0.3511	559	0.2561	7938.8	0.2455
Znf263(Zf)/K562-Znf263-ChIP-Seq(GSE31477)/Homer	CVGTSCTCCC	1	-2.01	0.3531	255	0.1168	3530.8	0.1092
PAX5(Paired,Homeobox),condensed/GM12878-PAX5-ChIP-Seq(GSE32465)/Homer	GTCACGCTCSCTGM	1	-2.007	0.3531	28	0.0128	330.6	0.0102
SF1(NR)/H295R-Nr5a1-ChIP-Seq(GSE44220)/Homer	CAAGGHCANV	1	-2.002	0.3531	112	0.0513	1491.9	0.0461
IRF:BATF(IRF:bZIP)/pDC-Irf8-ChIP-Seq(GSE66899)/Homer	CTTTCANTATGACTV	1	-1.972	0.3581	205	0.0939	2817	0.0871
Tcf21(bHLH)/ArterySmoothMuscle-Tcf21-ChIP-Seq(GSE61369)/Homer	NAACAGCTGG	1	-1.945	0.365	280	0.1283	3899.6	0.1206
AP-2alpha(AP2)/Hela-AP2alpha-ChIP-Seq(GSE31477)/Homer	ATGCCCTGAGGC	1	-1.931	0.3677	73	0.0334	950.7	0.0294
PU.1-IRF(ETS:IRF)/Bcell-PU.1-ChIP-Seq(GSE21512)/Homer	MGGAAGTGAAAC	1	-1.861	0.391	594	0.2721	8482.7	0.2624
THRa(NR)/C17.2-THRa-ChIP-Seq(GSE38347)/Homer	GGTCANYTGAGGWCA	1	-1.854	0.391	66	0.0302	858.8	0.0266
RUNX2(Runt)/PCa-RUNX2-ChIP-Seq(GSE33889)/Homer	NWAACCACADNN	1	-1.838	0.3944	431	0.1974	6106.8	0.1889
DMRT6(DM)/Testis-DMRT6-ChIP-Seq(GSE60440)/Homer	YDGHTACAWTGTADC	1	-1.836	0.3944	385	0.1764	5437.3	0.1682
VDR(NR),DR3/GM10855-VDR+vitD-ChIP-Seq(GSE22484)/Homer	ARAGGTCANWGAGTTCANNN	1	-1.813	0.3983	83	0.038	1099.5	0.034
GATA(Zf),IR3/iTreg-Gata3-ChIP-Seq(GSE20898)/Homer	NNNNNBAGATAWYATCTVHN	1	-1.792	0.4036	234	0.1072	3257.9	0.1008
Six2(Homeobox)/NephronProgenitor-Six2-ChIP-Seq(GSE39837)/Homer	GWAAYHTGAKMC	1	-1.758	0.4148	1041	0.4769	15085.8	0.4666
GLI3(Zf)/Limb-GLI3-ChIP-Chip(GSE11077)/Homer	CGTGGGTGGTCC	1	-1.749	0.4153	11	0.005	117.7	0.0036
CEBP:CEBP(bZIP)/MEF-Chop-ChIP-Seq(GSE35681)/Homer	NTNATGCAAYMNNHTGMAAY	1	-1.717	0.426	235	0.1077	3282.9	0.1015
Pbx3(Homeobox)/GM12878-PBX3-ChIP-Seq(GSE32465)/Homer	SCTGTCAMTCAN	1	-1.7	0.43	88	0.0403	1179.8	0.0365
GSC(Homeobox)/FrogEmbryos-GSC-ChIP-Seq(DRA000576)/Homer	RGGATTAR	1	-1.653	0.4478	1351	0.6189	19708.2	0.6095
STAT1(Stat)/HelaS3-STAT1-ChIP-Seq(GSE12782)/Homer	NATTTCCNGGAAAT	1	-1.651	0.4478	296	0.1356	4175.7	0.1291
RUNX(Runt)/HPC7-Runx1-ChIP-Seq(GSE22178)/Homer	SAAACCACAG	1	-1.651	0.4478	379	0.1736	5382.7	0.1665
MafK(bZIP)/C2C12-MafK-ChIP-Seq(GSE36030)/Homer	GCTGASTCAGCA	1	-1.65	0.4478	60	0.0275	789.5	0.0244
Klf9(Zf)/GBM-Klf9-ChIP-Seq(GSE62211)/Homer	GCCACRCCCACY	1	-1.643	0.4478	32	0.0147	401.1	0.0124
ISRE(IRF)/ThioMac-LPS-Expression(GSE23622)/Homer	AGTTTCASTTTC	1	-1.635	0.4478	75	0.0344	1001.8	0.031
HOXB13(Homeobox)/ProstateTumor-HOXB13-ChIP-Seq(GSE56288)/Homer	TTTTATKRGG	1	-1.631	0.4478	1738	0.7962	25492.4	0.7884
Pknox1(Homeobox)/ES-Prep1-ChIP-Seq(GSE63282)/Homer	SCTGTCAVTCAV	1	-1.597	0.4511	105	0.0481	1430.5	0.0442
Oct4:Sox17(POU,Homeobox,HMG)/F9-Sox17-ChIP-Seq(GSE44553)/Homer	CCATTGTATGCAAAT	1	-1.58	0.4558	346	0.1585	4914.9	0.152
FOXP1(Forkhead)/H9-FOXP1-ChIP-Seq(GSE31006)/Homer	NYYTGTTTACHN	1	-1.563	0.4605	1071	0.4906	15576.1	0.4817
NFY(CCAAT)/Promoter/Homer	RGCCAATSRG	1	-1.563	0.4605	685	0.3138	9881.5	0.3056
NF-E2(bZIP)/K562-NFE2-ChIP-Seq(GSE31477)/Homer	GATGACTCAGCA	1	-1.542	0.4641	21	0.0096	256.7	0.0079
GATA3(Zf)/iTreg-Gata3-ChIP-Seq(GSE20898)/Homer	AGATAASR	1	-1.541	0.4641	1671	0.7655	24507.6	0.758
Ascl1(bHLH)/NeuralTubes-Ascl1-ChIP-Seq(GSE55840)/Homer	NNVVCAGCTGBN	1	-1.527	0.4654	302	0.1383	4283.5	0.1325
Cdx2(Homeobox)/mES-Cdx2-ChIP-Seq(GSE14586)/Homer	GYMATAAAAH	1	-1.518	0.4666	1704	0.7806	25006.5	0.7734
Nur77(NR)/K562-NR4A1-ChIP-Seq(GSE31363)/Homer	TGACCTTTNCNT	1	-1.516	0.4666	189	0.0866	2646.2	0.0818
ZNF415(Zf)/HEK293-ZNF415.GFP-ChIP-Seq(GSE58341)/Homer	GRTGMTRGAGCC	1	-1.481	0.478	108	0.0495	1485.4	0.0459
E2A(bHLH)/proBcell-E2A-ChIP-Seq(GSE21978)/Homer	DNRCAGCTGY	1	-1.46	0.4848	238	0.109	3364	0.104
COUP-TFII(NR)/Artia-Nr2f2-ChIP-Seq(GSE46497)/Homer	AGRGGTCA	1	-1.452	0.4857	480	0.2199	6897.7	0.2133
FOXA1:AR(Forkhead,NR)/LNCAP-AR-ChIP-Seq(GSE27824)/Homer	AGTAAACAAAAAAGAACAND	1	-1.443	0.4869	223	0.1022	3149.7	0.0974
E2F6(E2F)/Hela-E2F6-ChIP-Seq(GSE31477)/Homer	GGCGGGAARN	1	-1.435	0.488	85	0.0389	1161.1	0.0359
IRF2(IRF)/Erythroblas-IRF2-ChIP-Seq(GSE36985)/Homer	GAAASYGAAASY	1	-1.431	0.488	121	0.0554	1677.2	0.0519
Six1(Homeobox)/Myoblast-Six1-ChIP-Chip(GSE20150)/Homer	GKVTCADRTTWC	1	-1.389	0.5049	257	0.1177	3652.6	0.113
Esrrb(NR)/mES-Esrrb-ChIP-Seq(GSE11431)/Homer	KTGACCTTGA	1	-1.387	0.5049	227	0.104	3216.7	0.0995
IRF4(IRF)/GM12878-IRF4-ChIP-Seq(GSE32465)/Homer	ACTGAAACCA	1	-1.333	0.5272	460	0.2107	6630.6	0.2051
NF1-halfsite(CTF)/LNCaP-NF1-ChIP-Seq(Unpublished)/Homer	YTGCCAAG	1	-1.314	0.5344	556	0.2547	8044.3	0.2488
Hoxc9(Homeobox)/Ainv15-Hoxc9-ChIP-Seq(GSE21812)/Homer	GGCCATAAATCA	1	-1.313	0.5344	1099	0.5034	16057.6	0.4966
Nanog(Homeobox)/mES-Nanog-ChIP-Seq(GSE11724)/Homer	RGCCATTAAC	1	-1.309	0.5344	2035	0.9322	30023	0.9285
GFX(?)/Promoter/Homer	ATTCTCGCGAGA	1	-1.285	0.54	5	0.0023	52.7	0.0016
ZNF317(Zf)/HEK293-ZNF317.GFP-ChIP-Seq(GSE58341)/Homer	GTCWGCTGTYYCTCT	1	-1.244	0.5596	27	0.0124	354.8	0.011
ZNF467(Zf)/HEK293-ZNF467.GFP-ChIP-Seq(GSE58341)/Homer	TGGGGAAGGGCM	1	-1.241	0.5596	141	0.0646	1990.6	0.0616
c-Myc(bHLH)/mES-cMyc-ChIP-Seq(GSE11431)/Homer	VVCCACGTGG	1	-1.163	0.6001	133	0.0609	1885.7	0.0583
CRX(Homeobox)/Retina-Crx-ChIP-Seq(GSE20012)/Homer	GCTAATCC	1	-1.141	0.6094	1745	0.7994	25706.7	0.795
Bach1(bZIP)/K562-Bach1-ChIP-Seq(GSE31477)/Homer	AWWNTGCTGAGTCAT	1	-1.124	0.6165	30	0.0137	404.6	0.0125
PAX3:FKHR-fusion(Paired,Homeobox)/Rh4-PAX3:FKHR-ChIP-Seq(GSE19063)/Homer	ACCRTGACTAATTNN	1	-1.12	0.6165	393	0.18	5696	0.1762
ZNF669(Zf)/HEK293-ZNF669.GFP-ChIP-Seq(GSE58341)/Homer	GARTGGTCATCGCCC	1	-1.098	0.6259	19	0.0087	250	0.0077
RUNX1(Runt)/Jurkat-RUNX1-ChIP-Seq(GSE29180)/Homer	AAACCACARM	1	-1.092	0.6259	557	0.2552	8116.5	0.251
ZNF143|STAF(Zf)/CUTLL-ZNF143-ChIP-Seq(GSE29600)/Homer	ATTTCCCAGVAKSCY	1	-1.083	0.6281	54	0.0247	751.9	0.0233
NPAS2(bHLH)/Liver-NPAS2-ChIP-Seq(GSE39860)/Homer	KCCACGTGAC	1	-1.071	0.6319	416	0.1906	6046.6	0.187
NFkB-p65(RHD)/GM12787-p65-ChIP-Seq(GSE19485)/Homer	WGGGGATTTCCC	1	-1.062	0.6345	135	0.0618	1929	0.0597
Sox10(HMG)/SciaticNerve-Sox3-ChIP-Seq(GSE35132)/Homer	CCWTTGTYYB	1	-1.057	0.6345	1139	0.5218	16727.3	0.5173
Sox15(HMG)/CPA-Sox15-ChIP-Seq(GSE62909)/Homer	RAACAATGGN	1	-1.056	0.6345	1140	0.5222	16742.7	0.5178
SCL(bHLH)/HPC7-Scl-ChIP-Seq(GSE13511)/Homer	AVCAGCTG	1	-1.045	0.6348	1166	0.5341	17131.7	0.5298
LXRE(NR),DR4/RAW-LXRb.biotin-ChIP-Seq(GSE21512)/Homer	RGGTTACTANAGGTCA	1	-1.033	0.6387	21	0.0096	282.5	0.0087
ERE(NR),IR3/MCF7-ERa-ChIP-Seq(Unpublished)/Homer	VAGGTCACNSTGACC	1	-1.011	0.6497	45	0.0206	628.6	0.0194
bZIP:IRF(bZIP,IRF)/Th17-BatF-ChIP-Seq(GSE39756)/Homer	NAGTTTCABTHTGACTNW	1	-0.9848	0.6632	584	0.2675	8545.7	0.2643
NF1(CTF)/LNCAP-NF1-ChIP-Seq(Unpublished)/Homer	CYTGGCABNSTGCCAR	1	-0.9798	0.6632	34	0.0156	472.3	0.0146
MyoG(bHLH)/C2C12-MyoG-ChIP-Seq(GSE36024)/Homer	AACAGCTG	1	-0.9747	0.6632	215	0.0985	3115.5	0.0964
Eomes(T-box)/H9-Eomes-ChIP-Seq(GSE26097)/Homer	ATTAACACCT	1	-0.9718	0.6632	1474	0.6752	21723.8	0.6719
EKLF(Zf)/Erythrocyte-Klf1-ChIP-Seq(GSE20478)/Homer	NWGGGTGTGGCY	1	-0.9616	0.6645	16	0.0073	215.7	0.0067
MafA(bZIP)/Islet-MafA-ChIP-Seq(GSE30298)/Homer	TGCTGACTCA	1	-0.942	0.6741	267	0.1223	3886.7	0.1202
Rfx5(HTH)/GM12878-Rfx5-ChIP-Seq(GSE31477)/Homer	SCCTAGCAACAG	1	-0.941	0.6741	177	0.0811	2564.7	0.0793
PU.1:IRF8(ETS:IRF)/pDC-Irf8-ChIP-Seq(GSE66899)/Homer	GGAAGTGAAAST	1	-0.9011	0.695	97	0.0444	1398.1	0.0432
Oct6(POU,Homeobox)/NPC-Pou3f1-ChIP-Seq(GSE35496)/Homer	WATGCAAATGAG	1	-0.8889	0.7	718	0.3289	10555.2	0.3264
OCT4-SOX2-TCF-NANOG(POU,Homeobox,HMG)/mES-Oct4-ChIP-Seq(GSE11431)/Homer	ATTTGCATAACAATG	1	-0.8833	0.7003	690	0.3161	10143.4	0.3137
ZNF528(Zf)/HEK293-ZNF528.GFP-ChIP-Seq(GSE58341)/Homer	AGAAATGACTTCCCT	1	-0.881	0.7003	2	0.0009	21.7	0.0007
RARg(NR)/ES-RARg-ChIP-Seq(GSE30538)/Homer	AGGTCAAGGTCA	1	-0.875	0.7003	7	0.0032	91.9	0.0028
GRHL2(CP2)/HBE-GRHL2-ChIP-Seq(GSE46194)/Homer	AAACYKGTTWDACMRGTTTB	1	-0.8741	0.7003	293	0.1342	4285.1	0.1325
ZBTB18(Zf)/HEK293-ZBTB18.GFP-ChIP-Seq(GSE58341)/Homer	AACATCTGGA	1	-0.8425	0.7148	157	0.0719	2289.5	0.0708
Tcf12(bHLH)/GM12878-Tcf12-ChIP-Seq(GSE32465)/Homer	VCAGCTGYTG	1	-0.8414	0.7148	183	0.0838	2672.2	0.0826
FXR(NR),IR1/Liver-FXR-ChIP-Seq(Chong_et_al.)/Homer	AGGTCANTGACCTB	1	-0.827	0.7188	72	0.033	1042.3	0.0322
TCFL2(HMG)/K562-TCF7L2-ChIP-Seq(GSE29196)/Homer	ACWTCAAAGG	1	-0.8241	0.7188	86	0.0394	1248.8	0.0386
ZNF189(Zf)/HEK293-ZNF189.GFP-ChIP-Seq(GSE58341)/Homer	TGGAACAGMA	1	-0.8196	0.7188	244	0.1118	3576.1	0.1106
Klf4(Zf)/mES-Klf4-ChIP-Seq(GSE11431)/Homer	GCCACACCCA	1	-0.7947	0.7315	32	0.0147	459.7	0.0142
HRE(HSF)/Striatum-HSF1-ChIP-Seq(GSE38000)/Homer	TTCTAGAABNTTCTA	1	-0.7837	0.7361	132	0.0605	1932.5	0.0598
Nkx2.1(Homeobox)/LungAC-Nkx2.1-ChIP-Seq(GSE43252)/Homer	RSCACTYRAG	1	-0.7692	0.7432	1276	0.5845	18860.4	0.5833
Phox2a(Homeobox)/Neuron-Phox2a-ChIP-Seq(GSE31456)/Homer	YTAATYNRATTA	1	-0.7685	0.7432	1474	0.6752	21794.4	0.674
RBPJ:Ebox(?,bHLH)/Panc1-Rbpj1-ChIP-Seq(GSE47459)/Homer	GGGRAARRGRMCAGMTG	1	-0.7625	0.7432	46	0.0211	668.2	0.0207
ZNF322(Zf)/HEK293-ZNF322.GFP-ChIP-Seq(GSE58341)/Homer	GAGCCTGGTACTGWGCCTGR	1	-0.7506	0.7463	10	0.0046	140	0.0043
NF1:FOXA1(CTF,Forkhead)/LNCAP-FOXA1-ChIP-Seq(GSE27824)/Homer	WNTGTTTRYTTTGGCA	1	-0.7355	0.7541	59	0.027	863.2	0.0267
HIF2a(bHLH)/785_O-HIF2a-ChIP-Seq(GSE34871)/Homer	GCACGTACCC	1	-0.7283	0.756	312	0.1429	4605.9	0.1424
CDX4(Homeobox)/ZebrafishEmbryos-Cdx4.Myc-ChIP-Seq(GSE48254)/Homer	NGYCATAAAWCH	1	-0.7282	0.756	1755	0.8039	25973.9	0.8033
NFkB-p65-Rel(RHD)/ThioMac-LPS-Expression(GSE23622)/Homer	GGAAATTCCC	1	-0.7115	0.7616	19	0.0087	275	0.0085
Nkx3.1(Homeobox)/LNCaP-Nkx3.1-ChIP-Seq(GSE28264)/Homer	AAGCACTTAA	1	-0.7083	0.7616	1360	0.623	20129.9	0.6226
CTCF-SatelliteElement(Zf?)/CD4+-CTCF-ChIP-Seq(Barski_et_al.)/Homer	TGCAGTTCCMVNWRTGGCCA	1	-0.68	0.7787	3	0.0014	40.5	0.0013
Foxa2(Forkhead)/Liver-Foxa2-ChIP-Seq(GSE25694)/Homer	CYTGTTTACWYW	1	-0.6603	0.7905	1300	0.5955	19261.8	0.5957
RAR:RXR(NR),DR5/ES-RAR-ChIP-Seq(GSE56893)/Homer	RGGTCADNNAGAGGTCAV	1	-0.6487	0.7961	4	0.0018	56.8	0.0018
Ronin(THAP)/ES-Thap11-ChIP-Seq(GSE51522)/Homer	RACTACAACTCCCAGVAKGC	1	-0.6465	0.7961	2	0.0009	26.8	0.0008
Tbox:Smad(T-box,MAD)/ESCd5-Smad2_3-ChIP-Seq(GSE29422)/Homer	AGGTGHCAGACA	1	-0.6409	0.7961	37	0.0169	549.2	0.017
Zic(Zf)/Cerebellum-ZIC1.2-ChIP-Seq(GSE60731)/Homer	CCTGCTGAGH	1	-0.6256	0.8036	196	0.0898	2915.8	0.0902
Brn1(POU,Homeobox)/NPC-Brn1-ChIP-Seq(GSE35496)/Homer	TATGCWAATBAV	1	-0.6165	0.8073	585	0.268	8689.2	0.2687
Otx2(Homeobox)/EpiLC-Otx2-ChIP-Seq(GSE56098)/Homer	NYTAATCCYB	1	-0.6112	0.808	920	0.4214	13656.1	0.4223
MyoD(bHLH)/Myotube-MyoD-ChIP-Seq(GSE21614)/Homer	RRCAGCTGYTSY	1	-0.6072	0.808	159	0.0728	2370.9	0.0733
Pax7(Paired,Homeobox),long/Myoblast-Pax7-ChIP-Seq(GSE25064)/Homer	TAATCHGATTAC	1	-0.6066	0.808	175	0.0802	2608.4	0.0807
Pitx1(Homeobox)/Chicken-Pitx1-ChIP-Seq(GSE38910)/Homer	TAATCCCN	1	-0.603	0.808	2031	0.9304	30093.9	0.9307
Brn2(POU,Homeobox)/NPC-Brn2-ChIP-Seq(GSE35496)/Homer	ATGAATATTC	1	-0.5805	0.8185	215	0.0985	3210.8	0.0993
ZNF264(Zf)/HEK293-ZNF264.GFP-ChIP-Seq(GSE58341)/Homer	RGGGCACTAACY	1	-0.5556	0.8354	253	0.1159	3783.7	0.117
Pitx1:Ebox(Homeobox,bHLH)/Hindlimb-Pitx1-ChIP-Seq(GSE41591)/Homer	YTAATTRAWWCCAGATGT	1	-0.554	0.8354	358	0.164	5345.9	0.1653
STAT6(Stat)/Macrophage-Stat6-ChIP-Seq(GSE38377)/Homer	TTCCKNAGAA	1	-0.5419	0.8396	414	0.1896	6182.6	0.1912
Unknown-ESC-element(?)/mES-Nanog-ChIP-Seq(GSE11724)/Homer	CACAGCAGGGGG	1	-0.5352	0.8416	49	0.0224	743.4	0.023
Pit1+1bp(Homeobox)/GCrat-Pit1-ChIP-Seq(GSE58009)/Homer	ATGCATAATTCA	1	-0.5287	0.8434	1142	0.5231	16985.4	0.5253
Ptf1a(bHLH)/Panc1-Ptf1a-ChIP-Seq(GSE47459)/Homer	ACAGCTGTTN	1	-0.5244	0.8434	609	0.279	9086.3	0.281
Pit1(Homeobox)/GCrat-Pit1-ChIP-Seq(GSE58009)/Homer	ATGMATATDC	1	-0.5178	0.8454	1637	0.7499	24311	0.7519
CLOCK(bHLH)/Liver-Clock-ChIP-Seq(GSE39860)/Homer	GHCACGTG	1	-0.5108	0.8477	303	0.1388	4543.4	0.1405
RORgt(NR)/EL4-RORgt.Flag-ChIP-Seq(GSE56019)/Homer	AAYTAGGTCA	1	-0.5054	0.8486	77	0.0353	1169.2	0.0362
OCT:OCT(POU,Homeobox)/NPC-Brn1-ChIP-Seq(GSE35496)/Homer	ATGAATATTCATGAG	1	-0.4845	0.863	17	0.0078	265.2	0.0082
Sox4(HMG)/proB-Sox4-ChIP-Seq(GSE50066)/Homer	YCTTTGTTCC	1	-0.4687	0.873	654	0.2996	9782.5	0.3025
GATA:SCL(Zf,bHLH)/Ter119-SCL-ChIP-Seq(GSE18720)/Homer	CRGCTGBNGNSNNSAGATAA	1	-0.4607	0.8763	41	0.0188	634.4	0.0196
PAX5(Paired,Homeobox)/GM12878-PAX5-ChIP-Seq(GSE32465)/Homer	GCAGCCAAGCRTGACH	1	-0.4586	0.8763	95	0.0435	1450.9	0.0449
KLF10(Zf)/HEK293-KLF10.GFP-ChIP-Seq(GSE58341)/Homer	GGGGGTGTGTCC	1	-0.452	0.8766	103	0.0472	1572.7	0.0486
ZNF692(Zf)/HEK293-ZNF692.GFP-ChIP-Seq(GSE58341)/Homer	GTGGGCCCCA	1	-0.4488	0.8766	6	0.0027	97	0.003
GFY(?)/Promoter/Homer	ACTACAATTCCC	1	-0.4449	0.8766	11	0.005	176.5	0.0055
Oct4(POU,Homeobox)/mES-Oct4-ChIP-Seq(GSE11431)/Homer	ATTTGCATAW	1	-0.4295	0.8855	948	0.4343	14167.1	0.4382
X-box(HTH)/NPC-H3K4me1-ChIP-Seq(GSE16256)/Homer	GGTTGCCATGGCAA	1	-0.4022	0.9064	78	0.0357	1207.7	0.0374
ETS:RUNX(ETS,Runt)/Jurkat-RUNX1-ChIP-Seq(GSE17954)/Homer	RCAGGATGTGGT	1	-0.3939	0.9102	9	0.0041	149.8	0.0046
PBX1(Homeobox)/MCF7-PBX1-ChIP-Seq(GSE28007)/Homer	GSCTGTCACTCA	1	-0.3876	0.9123	13	0.006	213.9	0.0066
Foxo3(Forkhead)/U2OS-Foxo3-ChIP-Seq(E-MTAB-2701)/Homer	DGTAAACA	1	-0.3805	0.915	1437	0.6583	21432.1	0.6628
ZBTB33(Zf)/GM12878-ZBTB33-ChIP-Seq(GSE32465)/Homer	GGVTCTCGCGAGAAC	1	-0.3722	0.9189	10	0.0046	167.6	0.0052
STAT6(Stat)/CD4-Stat6-ChIP-Seq(GSE22104)/Homer	ABTTCYYRRGAA	1	-0.3665	0.9205	562	0.2574	8471.8	0.262
HRE(HSF)/HepG2-HSF1-ChIP-Seq(GSE31477)/Homer	BSTTCTRGAABVTTCYAGAA	1	-0.3659	0.9205	39	0.0179	620.5	0.0192
CHR(?)/Hela-CellCycle-Expression/Homer	SRGTTTCAAA	1	-0.363	0.9205	1388	0.6358	20720	0.6408
FoxL2(Forkhead)/Ovary-FoxL2-ChIP-Seq(GSE60858)/Homer	WWTRTAAACAVG	1	-0.3601	0.9205	1724	0.7897	25671.8	0.794
USF1(bHLH)/GM12878-Usf1-ChIP-Seq(GSE32465)/Homer	SGTCACGTGR	1	-0.3547	0.9205	216	0.0989	3304.8	0.1022
Egr2(Zf)/Thymocytes-Egr2-ChIP-Seq(GSE34254)/Homer	NGCGTGGGCGGR	1	-0.3525	0.9205	10	0.0046	169.2	0.0052
Nkx6.1(Homeobox)/Islet-Nkx6.1-ChIP-Seq(GSE40975)/Homer	GKTAATGR	1	-0.3518	0.9205	2096	0.9601	31106.5	0.9621
Nr5a2(NR)/mES-Nr5a2-ChIP-Seq(GSE19019)/Homer	BTCAAGGTCA	1	-0.3439	0.9205	119	0.0545	1845.4	0.0571
Smad3(MAD)/NPC-Smad3-ChIP-Seq(GSE36673)/Homer	TWGTCTGV	1	-0.3432	0.9205	933	0.4274	14001.9	0.433
Sp1(Zf)/Promoter/Homer	GGCCCCGCCCCC	1	-0.3214	0.9295	4	0.0018	74	0.0023
HNF4a(NR),DR1/HepG2-HNF4a-ChIP-Seq(GSE25021)/Homer	CARRGKBCAAAGTYCA	1	-0.309	0.9375	147	0.0673	2282	0.0706
Smad4(MAD)/ESC-SMAD4-ChIP-Seq(GSE29422)/Homer	VBSYGTCTGG	1	-0.3081	0.9375	394	0.1805	5998.4	0.1855
HEB(bHLH)/mES-Heb-ChIP-Seq(GSE53233)/Homer	VCAGCTGBNN	1	-0.306	0.9375	348	0.1594	5310.1	0.1642
GATA3(Zf),DR4/iTreg-Gata3-ChIP-Seq(GSE20898)/Homer	AGATGKDGAGATAAG	1	-0.3024	0.9375	137	0.0628	2133.6	0.066
Foxo1(Forkhead)/RAW-Foxo1-ChIP-Seq(Fan_et_al.)/Homer	CTGTTTAC	1	-0.3007	0.9375	1491	0.683	22282.1	0.6891
FOXM1(Forkhead)/MCF7-FOXM1-ChIP-Seq(GSE72977)/Homer	TRTTTACTTW	1	-0.2993	0.9375	1619	0.7416	24166.4	0.7474
EBF(EBF)/proBcell-EBF-ChIP-Seq(GSE21978)/Homer	DGTCCCYRGGGA	1	-0.2987	0.9375	10	0.0046	175.8	0.0054
AR-halfsite(NR)/LNCaP-AR-ChIP-Seq(GSE27824)/Homer	CCAGGAACAG	1	-0.2921	0.9375	936	0.4288	14084.6	0.4356
OCT:OCT(POU,Homeobox,IR1)/NPC-Brn2-ChIP-Seq(GSE35496)/Homer	ATGAATWATTCATGA	1	-0.2738	0.9421	43	0.0197	702.8	0.0217
Nkx2.2(Homeobox)/NPC-Nkx2.2-ChIP-Seq(GSE61673)/Homer	BTBRAGTGSN	1	-0.2706	0.9421	781	0.3578	11799.8	0.3649
Pax8(Paired,Homeobox)/Thyroid-Pax8-ChIP-Seq(GSE26938)/Homer	GTCATGCHTGRCTGS	1	-0.2694	0.9421	35	0.016	578.4	0.0179
Bcl6(Zf)/Liver-Bcl6-ChIP-Seq(GSE31578)/Homer	NNNCTTTCCAGGAAA	1	-0.2688	0.9421	636	0.2913	9641.5	0.2982
ZNF519(Zf)/HEK293-ZNF519.GFP-ChIP-Seq(GSE58341)/Homer	GAGSCCGAGC	1	-0.2649	0.9421	8	0.0037	147	0.0045
FOXA1(Forkhead)/MCF7-FOXA1-ChIP-Seq(GSE26831)/Homer	WAAGTAAACA	1	-0.2615	0.9421	1731	0.7929	25835.8	0.799
BMAL1(bHLH)/Liver-Bmal1-ChIP-Seq(GSE39860)/Homer	GNCACGTG	1	-0.2607	0.9421	741	0.3394	11212.2	0.3468
Nrf2(bZIP)/Lymphoblast-Nrf2-ChIP-Seq(GSE37589)/Homer	HTGCTGAGTCAT	1	-0.2449	0.945	14	0.0064	248.4	0.0077
n-Myc(bHLH)/mES-nMyc-ChIP-Seq(GSE11431)/Homer	VRCCACGTGG	1	-0.2439	0.945	256	0.1173	3963.4	0.1226
CTCF(Zf)/CD4+-CTCF-ChIP-Seq(Barski_et_al.)/Homer	AYAGTGCCMYCTRGTGGCCA	1	-0.2364	0.9463	5	0.0023	98.1	0.003
NPAS(bHLH)/Liver-NPAS-ChIP-Seq(GSE39860)/Homer	NVCACGTG	1	-0.2284	0.9504	845	0.3871	12788.6	0.3955
TEAD4(TEA)/Tropoblast-Tead4-ChIP-Seq(GSE37350)/Homer	CCWGGAATGY	1	-0.2283	0.9504	343	0.1571	5285	0.1635
Erra(NR)/HepG2-Erra-ChIP-Seq(GSE31477)/Homer	CAAAGGTCAG	1	-0.2274	0.9504	519	0.2377	7927.1	0.2452
bHLHE40(bHLH)/HepG2-BHLHE40-ChIP-Seq(GSE31477)/Homer	KCACGTGMCN	1	-0.2273	0.9504	211	0.0967	3292.4	0.1018
FOXA1(Forkhead)/LNCAP-FOXA1-ChIP-Seq(GSE27824)/Homer	WAAGTAAACA	1	-0.2238	0.9504	1805	0.8268	26943.6	0.8333
TEAD2(TEA)/Py2T-Tead2-ChIP-Seq(GSE55709)/Homer	CCWGGAATGY	1	-0.1853	0.9747	211	0.0967	3319.7	0.1027
ZSCAN22(Zf)/HEK293-ZSCAN22.GFP-ChIP-Seq(GSE58341)/Homer	SMCAGTCWGAKGGAGGAGGC	1	-0.1783	0.9781	3	0.0014	68.5	0.0021
Bapx1(Homeobox)/VertebralCol-Bapx1-ChIP-Seq(GSE36672)/Homer	TTRAGTGSYK	1	-0.1763	0.9781	1161	0.5318	17529.2	0.5421
Rfx2(HTH)/LoVo-RFX2-ChIP-Seq(GSE49402)/Homer	GTTGCCATGGCAACM	1	-0.1751	0.9781	47	0.0215	795.6	0.0246
p53(p53)/Saos-p53-ChIP-Seq(GSE15780)/Homer	RRCATGYCYRGRCATGYYYN	1	-0.1686	0.9781	34	0.0156	590.3	0.0183
Hnf1(Homeobox)/Liver-Foxa2-Chip-Seq(GSE25694)/Homer	GGTTAAWCATTAA	1	-0.157	0.9853	759	0.3477	11585.1	0.3583
Smad2(MAD)/ES-SMAD2-ChIP-Seq(GSE29422)/Homer	CTGTCTGG	1	-0.1487	0.99	383	0.1754	5957.3	0.1842
NFkB-p50,p52(RHD)/Monocyte-p50-ChIP-Chip(Schreiber_et_al.)/Homer	GGGGGAATCCCC	1	-0.1443	0.991	7	0.0032	147.1	0.0046
E-box(bHLH)/Promoter/Homer	SSGGTCACGTGA	1	-0.1385	0.9934	34	0.0156	601.7	0.0186
E2F1(E2F)/Hela-E2F1-ChIP-Seq(GSE22478)/Homer	CWGGCGGGAA	1	-0.1367	0.9934	46	0.0211	795.7	0.0246
HOXD13(Homeobox)/Chicken-Hoxd13-ChIP-Seq(GSE38910)/Homer	NCYAATAAAA	1	-0.126	0.999	1915	0.8772	28618.5	0.8851
NFAT(RHD)/Jurkat-NFATC1-ChIP-Seq(Jolma_et_al.)/Homer	ATTTTCCATT	1	-0.1253	0.999	794	0.3637	12150.5	0.3758
Zfp809(Zf)/ES-Zfp809-ChIP-Seq(GSE70799)/Homer	GGGGCTYGKCTGGGA	1	-0.1167	1	7	0.0032	153.4	0.0047
ZNF136(Zf)/HEK293-ZNF136.GFP-ChIP-Seq(GSE58341)/Homer	YTKGATAHAGTATTCTWGGTNGGCA	1	-0.1122	1	187	0.0857	3012.6	0.0932
ZBTB12(Zf)/HEK293-ZBTB12.GFP-ChIP-Seq(GSE58341)/Homer	NGNTCTAGAACCNGV	1	-0.1092	1	104	0.0476	1728.1	0.0534
TR4(NR),DR1/Hela-TR4-ChIP-Seq(GSE24685)/Homer	GAGGTCAAAGGTCA	1	-0.1084	1	13	0.006	262.7	0.0081
FOXK2(Forkhead)/U2OS-FOXK2-ChIP-Seq(E-MTAB-2204)/Homer	SCHTGTTTACAT	1	-0.1047	1	1022	0.4682	15574.9	0.4817
Tbx20(T-box)/Heart-Tbx20-ChIP-Seq(GSE29636)/Homer	GGTGYTGACAGS	1	-0.09496	1	76	0.0348	1298.3	0.0402
ZNF416(Zf)/HEK293-ZNF416.GFP-ChIP-Seq(GSE58341)/Homer	WDNCTGGGCA	1	-0.08336	1	162	0.0742	2657.3	0.0822
ARE(NR)/LNCAP-AR-ChIP-Seq(GSE27824)/Homer	RGRACASNSTGTYCYB	1	-0.07981	1	45	0.0206	811.1	0.0251
Max(bHLH)/K562-Max-ChIP-Seq(GSE31477)/Homer	RCCACGTGGYYN	1	-0.07738	1	277	0.1269	4437.1	0.1372
T1ISRE(IRF)/ThioMac-Ifnb-Expression/Homer	ACTTTCGTTTCT	1	-0.07223	1	18	0.0082	364.8	0.0113
Mouse_Recombination_Hotspot(Zf)/Testis-DMC1-ChIP-Seq(GSE24438)/Homer	ACTYKNATTCGTGNTACTTC	1	-0.07165	1	83	0.038	1430.7	0.0442
PR(NR)/T47D-PR-ChIP-Seq(GSE31130)/Homer	VAGRACAKNCTGTBC	1	-0.07043	1	1017	0.4659	15571.9	0.4816
THRb(NR)/Liver-NR1A2-ChIP-Seq(GSE52613)/Homer	TRAGGTCA	1	-0.06386	1	1190	0.5451	18147.4	0.5613
RFX(HTH)/K562-RFX3-ChIP-Seq(SRA012198)/Homer	CGGTTGCCATGGCAAC	1	-0.06268	1	30	0.0137	576	0.0178
c-Myc(bHLH)/LNCAP-cMyc-ChIP-Seq(Unpublished)/Homer	VCCACGTG	1	-0.06134	1	248	0.1136	4019.1	0.1243
TEAD(TEA)/Fibroblast-PU.1-ChIP-Seq(Unpublished)/Homer	YCWGGAATGY	1	-0.05952	1	413	0.1892	6545.6	0.2024
PGR(NR)/EndoStromal-PGR-ChIP-Seq(GSE69539)/Homer	AAGAACATWHTGTTC	1	-0.05346	1	238	0.109	3880.7	0.12
GRE(NR),IR3/A549-GR-ChIP-Seq(GSE32465)/Homer	NRGVACABNVTGTYCY	1	-0.04493	1	28	0.0128	557	0.0172
ZNF382(Zf)/HEK293-ZNF382.GFP-ChIP-Seq(GSE58341)/Homer	GNCTGTASTRNTGBCTCHTT	1	-0.04403	1	4	0.0018	118.4	0.0037
Nkx2.5(Homeobox)/HL1-Nkx2.5.biotin-ChIP-Seq(GSE21529)/Homer	RRSCACTYAA	1	-0.03345	1	1033	0.4732	15929.6	0.4927
BORIS(Zf)/K562-CTCFL-ChIP-Seq(GSE32465)/Homer	CNNBRGCGCCCCCTGSTGGC	1	-0.02597	1	2	0.0009	82.2	0.0025
p63(p53)/Keratinocyte-p63-ChIP-Seq(GSE17611)/Homer	NNDRCATGYCYNRRCATGYH	1	-0.02551	1	90	0.0412	1614.9	0.0499
ZNF41(Zf)/HEK293-ZNF41.GFP-ChIP-Seq(GSE58341)/Homer	CCTCATGGTGYCYTWYTCCCTTGTG	1	-0.02516	1	3	0.0014	107.7	0.0033
Fox:Ebox(Forkhead,bHLH)/Panc1-Foxa2-ChIP-Seq(GSE47459)/Homer	NNNVCTGWGYAAACASN	1	-0.02225	1	948	0.4343	14727.6	0.4555
Tcfcp2l1(CP2)/mES-Tcfcp2l1-ChIP-Seq(GSE11431)/Homer	NRAACCRGTTYRAACCRGYT	1	-0.01788	1	31	0.0142	647.1	0.02
Rfx1(HTH)/NPC-H3K4me1-ChIP-Seq(GSE16256)/Homer	KGTTGCCATGGCAA	1	-0.01717	1	79	0.0362	1459.7	0.0451
PAX6(Paired,Homeobox)/Forebrain-Pax6-ChIP-Seq(GSE66961)/Homer	NGTGTTCAVTSAAGCGKAAA	1	-0.01678	1	56	0.0257	1078.8	0.0334
E2F4(E2F)/K562-E2F4-ChIP-Seq(GSE31477)/Homer	GGCGGGAAAH	1	-0.01604	1	232	0.1063	3906.8	0.1208
GRE(NR),IR3/RAW264.7-GRE-ChIP-Seq(Unpublished)/Homer	VAGRACAKWCTGTYC	1	-0.01435	1	84	0.0385	1552.8	0.048
E2A(bHLH),near_PU.1/Bcell-PU.1-ChIP-Seq(GSE21512)/Homer	NVCACCTGBN	1	-0.009377	1	187	0.0857	3242.7	0.1003
E2F(E2F)/Hela-CellCycle-Expression/Homer	TTSGCGCGAAAA	1	-0.004583	1	33	0.0151	736.2	0.0228
YY1(Zf)/Promoter/Homer	CAAGATGGCGGC	1	-0.002579	1	39	0.0179	866.9	0.0268
E2F7(E2F)/Hela-E2F7-ChIP-Seq(GSE32673)/Homer	VDTTTCCCGCCA	1	-0.001312	1	23	0.0105	592.3	0.0183
NRF(NRF)/Promoter/Homer	STGCGCATGCGC	1	-0.000244	1	57	0.0261	1281.7	0.0396
NRF1(NRF)/MCF7-NRF1-ChIP-Seq(Unpublished)/Homer	CTGCGCATGCGC	1	-1.9e-05	1	31	0.0142	874.8	0.0271
EBNA1(EBV-virus)/Raji-EBNA1-ChIP-Seq(GSE30709)/Homer	GGYAGCAYDTGCTDCCCNNN	1	0	1	0	0	18.9	0.0006
REST-NRSF(Zf)/Jurkat-NRSF-ChIP-Seq/Homer	GGMGCTGTCCATGGTGCTGA	1	0	1	0	0	1.8	0.0001
ZFP3(Zf)/HEK293-ZFP3.GFP-ChIP-Seq(GSE58341)/Homer	GGGTTTTGAAGGATGARTAGGAGTT	1	0	1	0	0	2.6	0.0001

## Sheet: chromVAR Variability Scores
long name	name	variability	bootstrap_lower_bound	bootstrap_upper_bound	p_value	p_value_adj
AP-1(bZIP)/ThioMac-PU.1-ChIP-Seq(GSE21512)/Homer	AP-1(bZIP)	2.34937	1.91553	2.64425	8.91094e-24	1.78219e-23
Atf7(bZIP)/3T3L1-Atf7-ChIP-Seq(GSE56872)/Homer	Atf7(bZIP)	5.19569	3.83911	6.09785	1.1e-175	3.52e-174
bZIP:IRF(bZIP,IRF)/Th17-BatF-ChIP-Seq(GSE39756)/Homer	bZIP:IRF(bZIP,IRF)	2.07186	1.70507	2.33281	3.15272e-16	3.88027e-16
Chop(bZIP)/MEF-Chop-ChIP-Seq(GSE35681)/Homer	Chop(bZIP)	2.85259	2.22288	3.33709	6.44083e-41	4.12213e-40
CRX(Homeobox)/Retina-Crx-ChIP-Seq(GSE20012)/Homer	CRX(Homeobox)	2.40046	1.95914	2.73191	2.57112e-25	5.48506e-25
E2F7(E2F)/Hela-E2F7-ChIP-Seq(GSE32673)/Homer	E2F7(E2F)	2.74186	2.30912	3.05969	8.99818e-37	4.79903e-36
E2A(bHLH),near_PU.1/Bcell-PU.1-ChIP-Seq(GSE21512)/Homer	E2A(bHLH),near_PU.1	2.02283	1.61918	2.32942	4.86487e-15	5.55985e-15
Egr2(Zf)/Thymocytes-Egr2-ChIP-Seq(GSE34254)/Homer	Egr2(Zf)	2.62657	2.05348	3.06818	1.11665e-32	4.46662e-32
ELF1(ETS)/Jurkat-ELF1-ChIP-Seq(SRA014231)/Homer	ELF1(ETS)	3.33617	2.70234	3.78112	1.96221e-61	3.13953e-60
FOXM1(Forkhead)/MCF7-FOXM1-ChIP-Seq(GSE72977)/Homer	FOXM1(Forkhead)	2.17638	1.56162	2.65534	6.58473e-19	9.16136e-19
GATA3(Zf),DR4/iTreg-Gata3-ChIP-Seq(GSE20898)/Homer	GATA3(Zf),DR4	2.25122	1.80106	2.54852	5.99537e-21	9.5926e-21
GATA(Zf),IR3/iTreg-Gata3-ChIP-Seq(GSE20898)/Homer	GATA(Zf),IR3	2.16441	1.67248	2.49837	1.36614e-18	1.82152e-18
HEB(bHLH)/mES-Heb-ChIP-Seq(GSE53233)/Homer	HEB(bHLH)	2.00283	1.50378	2.41462	1.44205e-14	1.44205e-14
Isl1(Homeobox)/Neuron-Isl1-ChIP-Seq(GSE31456)/Homer	Isl1(Homeobox)	2.44459	1.96655	2.78	1.10463e-26	2.71909e-26
Lhx2(Homeobox)/HFSC-Lhx2-ChIP-Seq(GSE48068)/Homer	Lhx2(Homeobox)	2.2347	1.70001	2.66907	1.72571e-20	2.62966e-20
NF1(CTF)/LNCAP-NF1-ChIP-Seq(Unpublished)/Homer	NF1(CTF)	2.01612	1.60237	2.28952	7.01762e-15	7.74358e-15
p53(p53)/mES-cMyc-ChIP-Seq(GSE11431)/Homer	p53(p53)	2.87876	2.37654	3.17571	6.29219e-42	5.03375e-41
PBX1(Homeobox)/MCF7-PBX1-ChIP-Seq(GSE28007)/Homer	PBX1(Homeobox)	2.03476	1.60282	2.35071	2.52317e-15	2.99042e-15
Phox2a(Homeobox)/Neuron-Phox2a-ChIP-Seq(GSE31456)/Homer	Phox2a(Homeobox)	2.09307	1.72014	2.36914	9.352e-17	1.19706e-16
Pit1+1bp(Homeobox)/GCrat-Pit1-ChIP-Seq(GSE58009)/Homer	Pit1+1bp(Homeobox)	2.00893	1.62041	2.27504	1.03704e-14	1.07049e-14
Rfx5(HTH)/GM12878-Rfx5-ChIP-Seq(GSE31477)/Homer	Rfx5(HTH)	2.0153	1.57325	2.35728	7.33672e-15	7.82583e-15
RORgt(NR)/EL4-RORgt.Flag-ChIP-Seq(GSE56019)/Homer	RORgt(NR)	2.25646	1.67606	2.65631	4.2785e-21	7.2059e-21
Smad4(MAD)/ESC-SMAD4-ChIP-Seq(GSE29422)/Homer	Smad4(MAD)	2.5061	1.97568	2.9143	1.20604e-28	4.28814e-28
Sox2(HMG)/mES-Sox2-ChIP-Seq(GSE11431)/Homer	Sox2(HMG)	2.46617	2.04303	2.78679	2.30365e-27	6.14307e-27
Srebp1a(bHLH)/HepG2-Srebp1a-ChIP-Seq(GSE31477)/Homer	Srebp1a(bHLH)	2.21576	1.56182	2.63451	5.71965e-20	8.31949e-20
STAT6(Stat)/CD4-Stat6-ChIP-Seq(GSE22104)/Homer	STAT6(Stat)	2.50188	1.81359	3.03908	1.65153e-28	5.25621e-28
TCFL2(HMG)/K562-TCF7L2-ChIP-Seq(GSE29196)/Homer	TCFL2(HMG)	2.73095	2.09786	3.15351	2.24512e-36	1.02634e-35
TEAD4(TEA)/Tropoblast-Tead4-ChIP-Seq(GSE37350)/Homer	TEAD4(TEA)	2.34725	1.82816	2.66581	1.02948e-23	1.93784e-23
YY1(Zf)/Promoter/Homer	YY1(Zf)	2.2884	1.75116	2.8326	5.33038e-22	9.47623e-22
ZBTB18(Zf)/HEK293-ZBTB18.GFP-ChIP-Seq(GSE58341)/Homer	ZBTB18(Zf)	2.50068	1.94079	2.9483	1.80682e-28	5.25621e-28
ZNF41(Zf)/HEK293-ZNF41.GFP-ChIP-Seq(GSE58341)/Homer	ZNF41(Zf)	3.19829	2.61487	3.57388	3.46177e-55	3.69255e-54
ZNF528(Zf)/HEK293-ZNF528.GFP-ChIP-Seq(GSE58341)/Homer	ZNF528(Zf)	2.42342	1.98409	2.73782	5.05082e-26	1.15447e-25
