# Supplementary material for: Generic injuries are sufficient to induce ectopic Wnt organizers in Hydra
Source: eLife. 2021 Mar 29;10:e60562. doi: 10.7554/eLife.60562 (PMC8049744; doi:10.7554/eLife.60562)
Supplement: Supplementary file 4. — Excel worksheet containing the sequences of all primers used in this study. [file elife-60562-supp4.xlsx]

## Sheet: Sheet1
Ad1	AATGATACGGCGACCACCGAGATCTACACTCGTCGGCAGCGTCAGATGTG	Buenrostro et al. 2013
Ad2.1	CAAGCAGAAGACGGCATACGAGATTCGCCTTAGTCTCGTGGGCTCGGAGATGT	Buenrostro et al. 2013
Ad2.2	CAAGCAGAAGACGGCATACGAGATCTAGTACGGTCTCGTGGGCTCGGAGATGT	Buenrostro et al. 2013
Ad2.3	CAAGCAGAAGACGGCATACGAGATTTCTGCCTGTCTCGTGGGCTCGGAGATGT	Buenrostro et al. 2013
Ad2.4	CAAGCAGAAGACGGCATACGAGATGCTCAGGAGTCTCGTGGGCTCGGAGATGT	Buenrostro et al. 2013
Ad2.5	CAAGCAGAAGACGGCATACGAGATAGGAGTCCGTCTCGTGGGCTCGGAGATGT	Buenrostro et al. 2013
Ad2.6	CAAGCAGAAGACGGCATACGAGATCATGCCTAGTCTCGTGGGCTCGGAGATGT	Buenrostro et al. 2013
Ad2.7	CAAGCAGAAGACGGCATACGAGATGTAGAGAGGTCTCGTGGGCTCGGAGATGT	Buenrostro et al. 2013
Ad2.8	CAAGCAGAAGACGGCATACGAGATCCTCTCTGGTCTCGTGGGCTCGGAGATGT	Buenrostro et al. 2013
Ad2.9	CAAGCAGAAGACGGCATACGAGATAGCGTAGCGTCTCGTGGGCTCGGAGATGT	Buenrostro et al. 2013
Ad2.10	CAAGCAGAAGACGGCATACGAGATCAGCCTCGGTCTCGTGGGCTCGGAGATGT	Buenrostro et al. 2013
Ad2.11	CAAGCAGAAGACGGCATACGAGATTGCCTCTTGTCTCGTGGGCTCGGAGATGT	Buenrostro et al. 2013
Ad2.12	CAAGCAGAAGACGGCATACGAGATTCCTCTACGTCTCGTGGGCTCGGAGATGT	Buenrostro et al. 2013
Wnt9/10c_qPCR_F	TCCAACATCGTCACCTCTGT	This study
Wnt9/10c_qPCR_R	CCATTTGCCAACGAGCATCC	This study
Wntless_qPCR_F	GGGATTTCAGGATTCTTTATACTTGG	This study
Wntless_qPCR_R	TCGATACCAAACCCAATCTTGAG	This study
Actin_qPCR_F	CGCCCTCGTAGTTGATAATGG	This study
Actin_qPCR_R	AATCCTTCTGTCCCATACCAA	This study
RP49_qPCR_F	GCCAAACTGGAGAAAACCTAAAG	This study
RP49_qPCR_R	TCAGGCATAAGATGACGTGTC	This study
Bra1_qPCR_F	AGACATTGATGGAGTTGCGC	This study
Bra1_qPCR_R	TCCAAACTGACGTGCACATG	This study
Wnt3_qPCR_F	GAGTTGACGGTTGCGAACTT	This study
Wnt3_qPCR_R	ACAGGTGTATTCAGGCGTCA	This study
